# Supplementary material for: Diverse alternative back-splicing and alternative splicing landscape of circular RNAs
Source: Genome Res. 2016 Sep;26(9):1277–87. doi: 10.1101/gr.202895.115 (PMC5052039; doi:10.1101/gr.202895.115)
Supplement: Supplemental Material [file supp_gr.202895.115_Supplemental_Table_S2.xlsx]

## Sheet: Table Legend
Supplemental Table S2. List of alternative back-splicing in highly expressed circRNAs from the examined cell lines.
Alternative 5' and 3' back-splice sites were detected from the examined 13 cell lines, listed with their genomic location, strand information, common 3'/5' back-splice sites with supported total junction read number, index of relevant alternative 5'/3' back-splice site with supported junction read number, PCU (Percent Circularized-site Usage, Methods) and RPM (mapped back-splice junction Reads Pe…

## Sheet: A549_A5BS
Chrom:Start-End	Strand	Common 3' back-splice site	Total junction reads of common 3' back-splice site	Index of alternative 5' back-splice site	Junction reads of this alternative 5' back-splice site	PCU (alternative 5' back-splice site)	RPM (junction reads of circRNA)
chr10:100154728-100160014	-	chr10:100160014	9	1	6	0.666667	0.0200375
chr10:100155147-100160014	-	chr10:100160014	9	2	3	0.333333	0.0100188
chr10:101571292-101572901	+	chr10:101571292	29	1	25	0.862069	0.0834896
chr10:101571292-101590608	+	chr10:101571292	29	2	4	0.137931	0.0133583
chr10:101590063-101591888	+	chr10:101590063	31	1	18	0.580645	0.0601125
chr10:101590063-101596047	+	chr10:101590063	31	2	7	0.225806	0.0233771
chr10:101590063-101606884	+	chr10:101590063	31	3	4	0.129032	0.0133583
chr10:101590063-101601850	+	chr10:101590063	31	4	2	0.064516	0.00667917
chr10:101591367-101606884	+	chr10:101591367	27	1	19	0.703704	0.0634521
chr10:101591367-101601850	+	chr10:101591367	27	2	8	0.296296	0.0267167
chr10:102697158-102710510	+	chr10:102697158	13	1	9	0.692308	0.0300563
chr10:102697158-102698493	+	chr10:102697158	13	2	3	0.230769	0.0100188
chr10:102697158-102703885	+	chr10:102697158	13	3	1	0.076923	0.00333959
chr10:103190101-103221815	+	chr10:103190101	5	1	3	0.6	0.0100188
chr10:103190101-103239214	+	chr10:103190101	5	2	2	0.4	0.00667917
chr10:103432671-103433430	-	chr10:103433430	15	1	7	0.466667	0.0233771
chr10:103384501-103433430	-	chr10:103433430	15	2	4	0.266667	0.0133583
chr10:103427642-103433430	-	chr10:103433430	15	3	4	0.266667	0.0133583
chr10:103427642-103436193	-	chr10:103436193	220	1	160	0.727273	0.534334
chr10:103432671-103436193	-	chr10:103436193	220	2	47	0.213636	0.156961
chr10:103384501-103436193	-	chr10:103436193	220	3	13	0.059091	0.0434146
chr10:103557736-103567658	-	chr10:103567658	9	1	5	0.555556	0.0166979
chr10:103552595-103567658	-	chr10:103567658	9	2	3	0.333333	0.0100188
chr10:103565801-103567658	-	chr10:103567658	9	3	1	0.111111	0.00333959
chr10:103557736-103573363	-	chr10:103573363	3	1	2	0.666667	0.00667917
chr10:103572786-103573363	-	chr10:103573363	3	2	1	0.333333	0.00333959
chr10:103699619-103717489	-	chr10:103717489	47	1	26	0.553191	0.0868292
chr10:103716353-103717489	-	chr10:103717489	47	2	15	0.319149	0.0500938
chr10:103649168-103717489	-	chr10:103717489	47	3	6	0.12766	0.0200375
chr10:103783233-103799882	-	chr10:103799882	8	1	5	0.625	0.0166979
chr10:103699619-103799882	-	chr10:103799882	8	2	3	0.375	0.0100188
chr10:104018685-104019873	+	chr10:104018685	8	1	6	0.75	0.0200375
chr10:104018685-104103939	+	chr10:104018685	8	2	2	0.25	0.00667917
chr10:104119940-104120152	+	chr10:104119940	35	1	32	0.914286	0.106867
chr10:104119940-104125356	+	chr10:104119940	35	2	2	0.057143	0.00667917
chr10:104119940-104136897	+	chr10:104119940	35	3	1	0.028571	0.00333959
chr10:104122231-104130617	+	chr10:104122231	7	1	4	0.571429	0.0133583
chr10:104122231-104122421	+	chr10:104122231	7	2	3	0.428571	0.0100188
chr10:104352338-104353822	+	chr10:104352338	4	1	2	0.5	0.00667917
chr10:104352338-104359301	+	chr10:104352338	4	2	2	0.5	0.00667917
chr10:1044942-1060252	+	chr10:1044942	14	1	8	0.571429	0.0267167
chr10:1044942-1053068	+	chr10:1044942	14	2	4	0.285714	0.0133583
chr10:1044942-1051847	+	chr10:1044942	14	3	2	0.142857	0.00667917
chr10:104850367-104855737	-	chr10:104855737	2	1	1	0.5	0.00333959
chr10:104851320-104855737	-	chr10:104855737	2	2	1	0.5	0.00333959
chr10:105187085-105194732	+	chr10:105187085	3	1	2	0.666667	0.00667917
chr10:105187085-105198565	+	chr10:105187085	3	2	1	0.333333	0.00333959
chr10:1118055-1132297	+	chr10:1118055	59	1	22	0.372881	0.0734709
chr10:1118055-1126416	+	chr10:1118055	59	2	16	0.271186	0.0534334
chr10:1118055-1142186	+	chr10:1118055	59	3	14	0.237288	0.0467542
chr10:1118055-1139436	+	chr10:1118055	59	4	7	0.118644	0.0233771
chr10:111860382-111879322	+	chr10:111860382	5	1	3	0.6	0.0100188
chr10:111860382-111882050	+	chr10:111860382	5	2	2	0.4	0.00667917
chr10:1130342-1142186	+	chr10:1130342	83	1	68	0.819277	0.227092
chr10:1130342-1151207	+	chr10:1130342	83	2	11	0.13253	0.0367354
chr10:1130342-1132297	+	chr10:1130342	83	3	4	0.048193	0.0133583
chr10:114724314-114799885	+	chr10:114724314	25	1	18	0.72	0.0601125
chr10:114724314-114849299	+	chr10:114724314	25	2	7	0.28	0.0233771
chr10:11789347-11791591	+	chr10:11789347	4	1	2	0.5	0.00667917
chr10:11789347-11797607	+	chr10:11789347	4	2	2	0.5	0.00667917
chr10:118661275-118681027	-	chr10:118681027	4	1	2	0.5	0.00667917
chr10:118674885-118681027	-	chr10:118681027	4	2	2	0.5	0.00667917
chr10:12039670-12042008	-	chr10:12042008	4	1	3	0.75	0.0100188
chr10:12009339-12042008	-	chr10:12042008	4	2	1	0.25	0.00333959
chr10:12039670-12056183	-	chr10:12056183	33	1	29	0.878788	0.096848
chr10:12021055-12056183	-	chr10:12056183	33	2	2	0.060606	0.00667917
chr10:11997230-12056183	-	chr10:12056183	33	3	1	0.030303	0.00333959
chr10:12006007-12056183	-	chr10:12056183	33	4	1	0.030303	0.00333959
chr10:12123470-12133683	+	chr10:12123470	188	1	52	0.276596	0.173658
chr10:12123470-12136270	+	chr10:12123470	188	2	50	0.265957	0.166979
chr10:12123470-12143180	+	chr10:12123470	188	3	31	0.164894	0.103527
chr10:12123470-12162266	+	chr10:12123470	188	4	29	0.154255	0.096848
chr10:12123470-12131254	+	chr10:12123470	188	5	9	0.047872	0.0300563
chr10:12123470-12155063	+	chr10:12123470	188	6	8	0.042553	0.0267167
chr10:12123470-12126750	+	chr10:12123470	188	7	6	0.031915	0.0200375
chr10:12123470-12129728	+	chr10:12123470	188	8	3	0.015957	0.0100188
chr10:12129533-12136270	+	chr10:12129533	3	1	2	0.666667	0.00667917
chr10:12129533-12139995	+	chr10:12129533	3	2	1	0.333333	0.00333959
chr10:121602765-121609088	-	chr10:121609088	3	1	2	0.666667	0.00667917
chr10:121596407-121609088	-	chr10:121609088	3	2	1	0.333333	0.00333959
chr10:122618154-122630858	+	chr10:122618154	6	1	5	0.833333	0.0166979
chr10:122618154-122633435	+	chr10:122618154	6	2	1	0.166667	0.00333959
chr10:123629520-123683844	-	chr10:123683844	35	1	14	0.4	0.0467542
chr10:123600596-123683844	-	chr10:123683844	35	2	8	0.228571	0.0267167
chr10:123549683-123683844	-	chr10:123683844	35	3	5	0.142857	0.0166979
chr10:123658355-123683844	-	chr10:123683844	35	4	4	0.114286	0.0133583
chr10:123596232-123683844	-	chr10:123683844	35	5	3	0.085714	0.0100188
chr10:123670420-123683844	-	chr10:123683844	35	6	1	0.028571	0.00333959
chr10:123892123-123903221	+	chr10:123892123	12	1	10	0.833333	0.0333959
chr10:123892123-123892249	+	chr10:123892123	12	2	2	0.166667	0.00667917
chr10:125780771-125806240	-	chr10:125806240	11	1	7	0.636364	0.0233771
chr10:125798030-125806240	-	chr10:125806240	11	2	4	0.363636	0.0133583
chr10:126185529-126205840	+	chr10:126185529	16	1	9	0.5625	0.0300563
chr10:126185529-126186697	+	chr10:126185529	16	2	7	0.4375	0.0233771
chr10:126395204-126395456	-	chr10:126395456	41	1	17	0.414634	0.056773
chr10:126370175-126395456	-	chr10:126395456	41	2	15	0.365854	0.0500938
chr10:126384726-126395456	-	chr10:126395456	41	3	9	0.219512	0.0300563
chr10:126631025-126631876	+	chr10:126631025	88	1	36	0.409091	0.120225
chr10:126631025-126650977	+	chr10:126631025	88	2	31	0.352273	0.103527
chr10:126631025-126655350	+	chr10:126631025	88	3	15	0.170455	0.0500938
chr10:126631025-126662967	+	chr10:126631025	88	4	6	0.068182	0.0200375
chr10:127540861-127569640	-	chr10:127569640	6	1	3	0.5	0.0100188
chr10:127555558-127569640	-	chr10:127569640	6	2	3	0.5	0.0100188
chr10:128768965-128798571	+	chr10:128768965	20	1	16	0.8	0.0534334
chr10:128768965-128788867	+	chr10:128768965	20	2	3	0.15	0.0100188
chr10:128768965-128810638	+	chr10:128768965	20	3	1	0.05	0.00333959
chr10:128829913-128851079	+	chr10:128829913	4	1	3	0.75	0.0100188
chr10:128829913-128841428	+	chr10:128829913	4	2	1	0.25	0.00333959
chr10:128859931-128908618	+	chr10:128859931	32	1	18	0.5625	0.0601125
chr10:128859931-128926028	+	chr10:128859931	32	2	8	0.25	0.0267167
chr10:128859931-128904565	+	chr10:128859931	32	3	5	0.15625	0.0166979
chr10:128859931-129055693	+	chr10:128859931	32	4	1	0.03125	0.00333959
chr10:128904494-128908618	+	chr10:128904494	15	1	13	0.866667	0.0434146
chr10:128904494-129046373	+	chr10:128904494	15	2	2	0.133333	0.00667917
chr10:13214375-13214765	+	chr10:13214375	18	1	14	0.777778	0.0467542
chr10:13214375-13217681	+	chr10:13214375	18	2	2	0.111111	0.00667917
chr10:13214375-13231080	+	chr10:13214375	18	3	2	0.111111	0.00667917
chr10:135106002-135107273	-	chr10:135107273	7	1	6	0.857143	0.0200375
chr10:135101632-135107273	-	chr10:135107273	7	2	1	0.142857	0.00333959
chr10:135209216-135216277	+	chr10:135209216	13	1	12	0.923077	0.040075
chr10:135209216-135212019	+	chr10:135209216	13	2	1	0.076923	0.00333959
chr10:15858833-15889942	-	chr10:15889942	23	1	10	0.434783	0.0333959
chr10:15875628-15889942	-	chr10:15889942	23	2	9	0.391304	0.0300563
chr10:15863654-15889942	-	chr10:15889942	23	3	3	0.130435	0.0100188
chr10:15883424-15889942	-	chr10:15889942	23	4	1	0.043478	0.00333959
chr10:17645558-17646046	-	chr10:17646046	3	1	2	0.666667	0.00667917
chr10:17636203-17646046	-	chr10:17646046	3	2	1	0.333333	0.00333959
chr10:22002700-22016857	+	chr10:22002700	54	1	48	0.888889	0.1603
chr10:22002700-22002879	+	chr10:22002700	54	2	6	0.111111	0.0200375
chr10:22193450-22209892	-	chr10:22209892	5	1	4	0.8	0.0133583
chr10:22171210-22209892	-	chr10:22209892	5	2	1	0.2	0.00333959
chr10:225933-267296	+	chr10:225933	18	1	12	0.666667	0.040075
chr10:225933-255988	+	chr10:225933	18	2	4	0.222222	0.0133583
chr10:225933-226068	+	chr10:225933	18	3	2	0.111111	0.00667917
chr10:22880557-22898646	-	chr10:22898646	7	1	6	0.857143	0.0200375
chr10:22896855-22898646	-	chr10:22898646	7	2	1	0.142857	0.00333959
chr10:26993605-26994323	+	chr10:26993605	7	1	6	0.857143	0.0200375
chr10:26993605-26998697	+	chr10:26993605	7	2	1	0.142857	0.00333959
chr10:27403449-27410377	-	chr10:27410377	2	1	1	0.5	0.00333959
chr10:27406504-27410377	-	chr10:27410377	2	2	1	0.5	0.00333959
chr10:27420787-27425314	-	chr10:27425314	2	1	1	0.5	0.00333959
chr10:27423759-27425314	-	chr10:27425314	2	2	1	0.5	0.00333959
chr10:27458872-27462188	+	chr10:27458872	20	1	16	0.8	0.0534334
chr10:27458872-27460012	+	chr10:27458872	20	2	4	0.2	0.0133583
chr10:28872327-28884970	+	chr10:28872327	5	1	3	0.6	0.0100188
chr10:28872327-28879761	+	chr10:28872327	5	2	2	0.4	0.00667917
chr10:3143556-3151672	+	chr10:3143556	4	1	3	0.75	0.0100188
chr10:3143556-3143746	+	chr10:3143556	4	2	1	0.25	0.00333959
chr10:3160973-3162236	+	chr10:3160973	54	1	53	0.981481	0.176998
chr10:3160973-3175506	+	chr10:3160973	54	2	1	0.018519	0.00333959
chr10:31661946-31676195	+	chr10:31661946	24	1	20	0.833333	0.0667917
chr10:31661946-31676727	+	chr10:31661946	24	2	3	0.125	0.0100188
chr10:31661946-31791437	+	chr10:31661946	24	3	1	0.041667	0.00333959
chr10:3174571-3175506	+	chr10:3174571	7	1	4	0.571429	0.0133583
chr10:3174571-3178030	+	chr10:3174571	7	2	3	0.428571	0.0100188
chr10:33481208-33486637	-	chr10:33486637	9	1	5	0.555556	0.0166979
chr10:33474555-33486637	-	chr10:33486637	9	2	4	0.444444	0.0133583
chr10:34620044-34630744	-	chr10:34630744	27	1	22	0.814815	0.0734709
chr10:34558584-34630744	-	chr10:34630744	27	2	4	0.148148	0.0133583
chr10:34420390-34630744	-	chr10:34630744	27	3	1	0.037037	0.00333959
chr10:34558584-34637043	-	chr10:34637043	6	1	5	0.833333	0.0166979
chr10:34606034-34637043	-	chr10:34637043	6	2	1	0.166667	0.00333959
chr10:34620044-34649187	-	chr10:34649187	91	1	37	0.406593	0.123565
chr10:34630554-34649187	-	chr10:34649187	91	2	32	0.351648	0.106867
chr10:34636892-34649187	-	chr10:34649187	91	3	8	0.087912	0.0267167
chr10:34648074-34649187	-	chr10:34649187	91	4	8	0.087912	0.0267167
chr10:34573062-34649187	-	chr10:34649187	91	5	4	0.043956	0.0133583
chr10:34558584-34649187	-	chr10:34649187	91	6	1	0.010989	0.00333959
chr10:34606034-34649187	-	chr10:34649187	91	7	1	0.010989	0.00333959
chr10:34661425-34673182	-	chr10:34673182	37	1	16	0.432432	0.0534334
chr10:34636892-34673182	-	chr10:34673182	37	2	9	0.243243	0.0300563
chr10:34648074-34673182	-	chr10:34673182	37	3	6	0.162162	0.0200375
chr10:34663801-34673182	-	chr10:34673182	37	4	4	0.108108	0.0133583
chr10:34606034-34673182	-	chr10:34673182	37	5	1	0.027027	0.00333959
chr10:34620044-34673182	-	chr10:34673182	37	6	1	0.027027	0.00333959
chr10:34739244-34806087	-	chr10:34806087	11	1	5	0.454545	0.0166979
chr10:34759012-34806087	-	chr10:34806087	11	2	4	0.363636	0.0133583
chr10:34606034-34806087	-	chr10:34806087	11	3	1	0.090909	0.00333959
chr10:34671467-34806087	-	chr10:34806087	11	4	1	0.090909	0.00333959
chr10:34985245-34985347	-	chr10:34985347	7	1	5	0.714286	0.0166979
chr10:34805906-34985347	-	chr10:34985347	7	2	2	0.285714	0.00667917
chr10:35805450-35819171	+	chr10:35805450	55	1	50	0.909091	0.166979
chr10:35805450-35842113	+	chr10:35805450	55	2	4	0.072727	0.0133583
chr10:35805450-35814927	+	chr10:35805450	55	3	1	0.018182	0.00333959
chr10:372945-375541	-	chr10:375541	3	1	2	0.666667	0.00667917
chr10:355970-375541	-	chr10:375541	3	2	1	0.333333	0.00333959
chr10:46120030-46122553	-	chr10:46122553	2	1	1	0.5	0.00333959
chr10:46121398-46122553	-	chr10:46122553	2	2	1	0.5	0.00333959
chr10:4872866-4951798	+	chr10:4872866	279	1	64	0.229391	0.213733
chr10:4872866-4950612	+	chr10:4872866	279	2	56	0.200717	0.187017
chr10:4872866-4889852	+	chr10:4872866	279	3	35	0.125448	0.116885
chr10:4872866-4889491	+	chr10:4872866	279	4	25	0.089606	0.0834896
chr10:4872866-4932115	+	chr10:4872866	279	5	25	0.089606	0.0834896
chr10:4872866-4975522	+	chr10:4872866	279	6	25	0.089606	0.0834896
chr10:4872866-4884696	+	chr10:4872866	279	7	22	0.078853	0.0734709
chr10:4872866-4915499	+	chr10:4872866	279	8	17	0.060932	0.056773
chr10:4872866-4878001	+	chr10:4872866	279	9	8	0.028674	0.0267167
chr10:4872866-5014941	+	chr10:4872866	279	10	2	0.007168	0.00667917
chr10:4950542-4951798	+	chr10:4950542	13	1	9	0.692308	0.0300563
chr10:4950542-4975522	+	chr10:4950542	13	2	4	0.307692	0.0133583
chr10:49609654-49613024	+	chr10:49609654	9	1	5	0.555556	0.0166979
chr10:49609654-49618211	+	chr10:49609654	9	2	4	0.444444	0.0133583
chr10:5014392-5144842	+	chr10:5014392	5	1	3	0.6	0.0100188
chr10:5014392-5014941	+	chr10:5014392	5	2	2	0.4	0.00667917
chr10:52193235-52350007	-	chr10:52350007	7	1	3	0.428571	0.0100188
chr10:52279590-52350007	-	chr10:52350007	7	2	3	0.428571	0.0100188
chr10:52220432-52350007	-	chr10:52350007	7	3	1	0.142857	0.00333959
chr10:518378-532470	-	chr10:532470	37	1	28	0.756757	0.0935084
chr10:486810-532470	-	chr10:532470	37	2	5	0.135135	0.0166979
chr10:468763-532470	-	chr10:532470	37	3	4	0.108108	0.0133583
chr10:5762506-5769086	+	chr10:5762506	8	1	6	0.75	0.0200375
chr10:5762506-5766496	+	chr10:5762506	8	2	1	0.125	0.00333959
chr10:5762506-5773166	+	chr10:5762506	8	3	1	0.125	0.00333959
chr10:5827104-5842668	-	chr10:5842668	34	1	24	0.705882	0.08015
chr10:5815804-5842668	-	chr10:5842668	34	2	6	0.176471	0.0200375
chr10:5836847-5842668	-	chr10:5842668	34	3	4	0.117647	0.0133583
chr10:5950887-5951257	+	chr10:5950887	4	1	3	0.75	0.0100188
chr10:5950887-5953091	+	chr10:5950887	4	2	1	0.25	0.00333959
chr10:5998341-6002530	-	chr10:6002530	4	1	3	0.75	0.0100188
chr10:6001716-6002530	-	chr10:6002530	4	2	1	0.25	0.00333959
chr10:6255585-6257280	+	chr10:6255585	3	1	2	0.666667	0.00667917
chr10:6255585-6265983	+	chr10:6255585	3	2	1	0.333333	0.00333959
chr10:64966354-64968995	-	chr10:64968995	5	1	3	0.6	0.0100188
chr10:64954045-64968995	-	chr10:64968995	5	2	1	0.2	0.00333959
chr10:64957170-64968995	-	chr10:64968995	5	3	1	0.2	0.00333959
chr10:69714351-69773943	-	chr10:69773943	59	1	29	0.491525	0.096848
chr10:69726439-69773943	-	chr10:69773943	59	2	19	0.322034	0.0634521
chr10:69748419-69773943	-	chr10:69773943	59	3	7	0.118644	0.0233771
chr10:69747799-69773943	-	chr10:69773943	59	4	4	0.067797	0.0133583
chr10:69785302-69804320	-	chr10:69804320	69	1	47	0.681159	0.156961
chr10:69726439-69804320	-	chr10:69804320	69	2	13	0.188406	0.0434146
chr10:69750660-69804320	-	chr10:69804320	69	3	4	0.057971	0.0133583
chr10:69797849-69804320	-	chr10:69804320	69	4	4	0.057971	0.0133583
chr10:69747799-69804320	-	chr10:69804320	69	5	1	0.014493	0.00333959
chr10:70218860-70229920	-	chr10:70229920	11	1	8	0.727273	0.0267167
chr10:70196767-70229920	-	chr10:70229920	11	2	2	0.181818	0.00667917
chr10:70227879-70229920	-	chr10:70229920	11	3	1	0.090909	0.00333959
chr10:70497601-70502326	+	chr10:70497601	49	1	48	0.979592	0.1603
chr10:70497601-70500418	+	chr10:70497601	49	2	1	0.020408	0.00333959
chr10:71243446-71244971	+	chr10:71243446	142	1	109	0.767606	0.364015
chr10:71243446-71258152	+	chr10:71243446	142	2	29	0.204225	0.096848
chr10:71243446-71264241	+	chr10:71243446	142	3	4	0.028169	0.0133583
chr10:71255349-71258152	+	chr10:71255349	3	1	2	0.666667	0.00667917
chr10:71255349-71265996	+	chr10:71255349	3	2	1	0.333333	0.00333959
chr10:72285678-72291210	+	chr10:72285678	7	1	5	0.714286	0.0166979
chr10:72285678-72301290	+	chr10:72285678	7	2	2	0.285714	0.00667917
chr10:72604229-72610967	+	chr10:72604229	6	1	2	0.333333	0.00667917
chr10:72604229-72619256	+	chr10:72604229	6	2	2	0.333333	0.00667917
chr10:72604229-72628190	+	chr10:72604229	6	3	2	0.333333	0.00667917
chr10:7262372-7269899	-	chr10:7269899	29	1	25	0.862069	0.0834896
chr10:7230585-7269899	-	chr10:7269899	29	2	4	0.137931	0.0133583
chr10:7318853-7327916	-	chr10:7327916	128	1	72	0.5625	0.24045
chr10:7285519-7327916	-	chr10:7327916	128	2	52	0.40625	0.173658
chr10:7269816-7327916	-	chr10:7327916	128	3	2	0.015625	0.00667917
chr10:7290509-7327916	-	chr10:7327916	128	4	1	0.007812	0.00333959
chr10:7325865-7327916	-	chr10:7327916	128	5	1	0.007812	0.00333959
chr10:7318853-7423911	-	chr10:7423911	3	1	2	0.666667	0.00667917
chr10:7290509-7423911	-	chr10:7423911	3	2	1	0.333333	0.00333959
chr10:74310936-74326552	-	chr10:74326552	16	1	12	0.75	0.040075
chr10:74267912-74326552	-	chr10:74326552	16	2	4	0.25	0.0133583
chr10:74934444-74953351	+	chr10:74934444	3	1	1	0.333333	0.00333959
chr10:74934444-74968544	+	chr10:74934444	3	2	1	0.333333	0.00333959
chr10:74934444-74970196	+	chr10:74934444	3	3	1	0.333333	0.00333959
chr10:75156276-75160615	-	chr10:75160615	53	1	48	0.90566	0.1603
chr10:75148069-75160615	-	chr10:75160615	53	2	5	0.09434	0.0166979
chr10:75296026-75299351	-	chr10:75299351	14	1	10	0.714286	0.0333959
chr10:75289437-75299351	-	chr10:75299351	14	2	4	0.285714	0.0133583
chr10:75302560-75302889	-	chr10:75302889	17	1	14	0.823529	0.0467542
chr10:75299201-75302889	-	chr10:75302889	17	2	3	0.176471	0.0100188
chr10:75331178-75336119	-	chr10:75336119	9	1	6	0.666667	0.0200375
chr10:75335269-75336119	-	chr10:75336119	9	2	3	0.333333	0.0100188
chr10:75830427-75834661	+	chr10:75830427	6	1	4	0.666667	0.0133583
chr10:75830427-75832610	+	chr10:75830427	6	2	1	0.166667	0.00333959
chr10:75830427-75860855	+	chr10:75830427	6	3	1	0.166667	0.00333959
chr10:76910271-76928416	+	chr10:76910271	18	1	11	0.611111	0.0367354
chr10:76910271-76924498	+	chr10:76910271	18	2	5	0.277778	0.0166979
chr10:76910271-76910864	+	chr10:76910271	18	3	2	0.111111	0.00667917
chr10:76978820-76979114	+	chr10:76978820	2	1	1	0.5	0.00333959
chr10:76978820-76980728	+	chr10:76978820	2	2	1	0.5	0.00333959
chr10:80878671-80976031	+	chr10:80878671	30	1	12	0.4	0.040075
chr10:80878671-80899534	+	chr10:80878671	30	2	10	0.333333	0.0333959
chr10:80878671-80921890	+	chr10:80878671	30	3	8	0.266667	0.0267167
chr10:80961340-80976031	+	chr10:80961340	21	1	17	0.809524	0.056773
chr10:80961340-81037082	+	chr10:80961340	21	2	3	0.142857	0.0100188
chr10:80961340-80968206	+	chr10:80961340	21	3	1	0.047619	0.00333959
chr10:82228302-82249070	+	chr10:82228302	27	1	23	0.851852	0.0768105
chr10:82228302-82264534	+	chr10:82228302	27	2	4	0.148148	0.0133583
chr10:86130769-86133571	+	chr10:86130769	9	1	7	0.777778	0.0233771
chr10:86130769-86185649	+	chr10:86130769	9	2	2	0.222222	0.00667917
chr10:86177526-86185649	+	chr10:86177526	147	1	107	0.727891	0.357336
chr10:86177526-86198463	+	chr10:86177526	147	2	29	0.197279	0.096848
chr10:86177526-86237420	+	chr10:86177526	147	3	6	0.040816	0.0200375
chr10:86177526-86223772	+	chr10:86177526	147	4	5	0.034014	0.0166979
chr10:88211723-88221044	-	chr10:88221044	6	1	5	0.833333	0.0166979
chr10:88212976-88221044	-	chr10:88221044	6	2	1	0.166667	0.00333959
chr10:88230748-88233730	-	chr10:88233730	27	1	10	0.37037	0.0333959
chr10:88203031-88233730	-	chr10:88233730	27	2	6	0.222222	0.0200375
chr10:88211723-88233730	-	chr10:88233730	27	3	5	0.185185	0.0166979
chr10:88231964-88233730	-	chr10:88233730	27	4	5	0.185185	0.0166979
chr10:88220932-88233730	-	chr10:88233730	27	5	1	0.037037	0.00333959
chr10:875324-890995	-	chr10:890995	14	1	11	0.785714	0.0367354
chr10:882342-890995	-	chr10:890995	14	2	3	0.214286	0.0100188
chr10:89530708-89536184	-	chr10:89536184	14	1	8	0.571429	0.0267167
chr10:89527429-89536184	-	chr10:89536184	14	2	6	0.428571	0.0200375
chr10:909682-910210	-	chr10:910210	22	1	19	0.863636	0.0634521
chr10:875324-910210	-	chr10:910210	22	2	3	0.136364	0.0100188
chr10:930386-931700	-	chr10:931700	172	1	96	0.55814	0.3206
chr10:909682-931700	-	chr10:931700	172	2	37	0.215116	0.123565
chr10:888871-931700	-	chr10:931700	172	3	18	0.104651	0.0601125
chr10:910062-931700	-	chr10:931700	172	4	9	0.052326	0.0300563
chr10:875324-931700	-	chr10:931700	172	5	7	0.040698	0.0233771
chr10:915952-931700	-	chr10:931700	172	6	5	0.02907	0.0166979
chr10:93579026-93602148	+	chr10:93579026	4	1	3	0.75	0.0100188
chr10:93579026-93582119	+	chr10:93579026	4	2	1	0.25	0.00333959
chr10:93608139-93611093	+	chr10:93608139	21	1	20	0.952381	0.0667917
chr10:93608139-93609351	+	chr10:93608139	21	2	1	0.047619	0.00333959
chr10:93754291-93768032	+	chr10:93754291	12	1	8	0.666667	0.0267167
chr10:93754291-93757508	+	chr10:93754291	12	2	4	0.333333	0.0133583
chr10:93756125-93757508	+	chr10:93756125	15	1	12	0.8	0.040075
chr10:93756125-93778692	+	chr10:93756125	15	2	3	0.2	0.0100188
chr10:94653105-94659401	+	chr10:94653105	10	1	3	0.3	0.0100188
chr10:94653105-94669388	+	chr10:94653105	10	2	3	0.3	0.0100188
chr10:94653105-94679807	+	chr10:94653105	10	3	3	0.3	0.0100188
chr10:94653105-94715471	+	chr10:94653105	10	4	1	0.1	0.00333959
chr10:96201652-96234540	+	chr10:96201652	6	1	4	0.666667	0.0133583
chr10:96201652-96253204	+	chr10:96201652	6	2	2	0.333333	0.00667917
chr10:98667021-98711953	+	chr10:98667021	3	1	2	0.666667	0.00667917
chr10:98667021-98667504	+	chr10:98667021	3	2	1	0.333333	0.00333959
chr10:99236439-99238146	-	chr10:99238146	14	1	13	0.928571	0.0434146
chr10:99237103-99238146	-	chr10:99238146	14	2	1	0.071429	0.00333959
chr10:99416041-99416731	+	chr10:99416041	23	1	19	0.826087	0.0634521
chr10:99416041-99422725	+	chr10:99416041	23	2	4	0.173913	0.0133583
chr10:99967857-99969656	+	chr10:99967857	5	1	4	0.8	0.0133583
chr10:99967857-99991444	+	chr10:99967857	5	2	1	0.2	0.00333959
chr1:100524221-100527505	+	chr1:100524221	2	1	1	0.5	0.00333959
chr1:100524221-100534142	+	chr1:100524221	2	2	1	0.5	0.00333959
chr1:101379218-101379362	+	chr1:101379218	10	1	7	0.7	0.0233771
chr1:101379218-101387397	+	chr1:101379218	10	2	3	0.3	0.0100188
chr1:10177516-10195244	+	chr1:10177516	2	1	1	0.5	0.00333959
chr1:10177516-10197263	+	chr1:10177516	2	2	1	0.5	0.00333959
chr1:10463127-10464336	+	chr1:10463127	61	1	56	0.918033	0.187017
chr1:10463127-10468197	+	chr1:10463127	61	2	5	0.081967	0.0166979
chr1:108690900-108703915	-	chr1:108703915	3	1	2	0.666667	0.00667917
chr1:108686164-108703915	-	chr1:108703915	3	2	1	0.333333	0.00333959
chr11:9983503-10024236	-	chr11:10024236	4	1	3	0.75	0.0100188
chr11:10011043-10024236	-	chr11:10024236	4	2	1	0.25	0.00333959
chr11:102056748-102076805	+	chr11:102056748	19	1	10	0.526316	0.0333959
chr11:102056748-102080295	+	chr11:102056748	19	2	9	0.473684	0.0300563
chr11:103151076-103339433	+	chr11:103151076	6	1	4	0.666667	0.0133583
chr11:103151076-103158334	+	chr11:103151076	6	2	2	0.333333	0.00667917
chr1:110551655-110553979	+	chr1:110551655	3	1	2	0.666667	0.00667917
chr1:110551655-110561089	+	chr1:110551655	3	2	1	0.333333	0.00333959
chr11:107916996-107923528	+	chr11:107916996	3	1	2	0.666667	0.00667917
chr11:107916996-107940916	+	chr11:107916996	3	2	1	0.333333	0.00333959
chr11:108186549-108188248	+	chr11:108186549	9	1	5	0.555556	0.0166979
chr11:108186549-108206688	+	chr11:108186549	9	2	4	0.444444	0.0133583
chr1:11133990-11137005	-	chr1:11137005	6	1	4	0.666667	0.0133583
chr1:11130956-11137005	-	chr1:11137005	6	2	2	0.333333	0.00667917
chr11:115099832-115111140	-	chr11:115111140	6	1	4	0.666667	0.0133583
chr11:115080293-115111140	-	chr11:115111140	6	2	2	0.333333	0.00667917
chr11:117052131-117053522	+	chr11:117052131	4	1	2	0.5	0.00667917
chr11:117052131-117061456	+	chr11:117052131	4	2	2	0.5	0.00667917
chr11:118368650-118372572	+	chr11:118368650	4	1	3	0.75	0.0100188
chr11:118368650-118370135	+	chr11:118368650	4	2	1	0.25	0.00333959
chr11:118427620-118430579	-	chr11:118430579	8	1	5	0.625	0.0166979
chr11:118422500-118430579	-	chr11:118430579	8	2	3	0.375	0.0100188
chr11:119142444-119145663	+	chr11:119142444	5	1	2	0.4	0.00667917
chr11:119142444-119158656	+	chr11:119142444	5	2	2	0.4	0.00667917
chr11:119142444-119155810	+	chr11:119142444	5	3	1	0.2	0.00333959
chr11:120276826-120278532	+	chr11:120276826	82	1	47	0.573171	0.156961
chr11:120276826-120280159	+	chr11:120276826	82	2	21	0.256098	0.0701313
chr11:120276826-120302620	+	chr11:120276826	82	3	14	0.170732	0.0467542
chr11:120291461-120298956	+	chr11:120291461	4	1	3	0.75	0.0100188
chr11:120291461-120348235	+	chr11:120291461	4	2	1	0.25	0.00333959
chr11:120916382-120930794	+	chr11:120916382	13	1	6	0.461538	0.0200375
chr11:120916382-120924441	+	chr11:120916382	13	2	4	0.307692	0.0133583
chr11:120916382-120926017	+	chr11:120916382	13	3	3	0.230769	0.0100188
chr11:122646926-122647918	+	chr11:122646926	72	1	55	0.763889	0.183677
chr11:122646926-122653930	+	chr11:122646926	72	2	8	0.111111	0.0267167
chr11:122646926-122650403	+	chr11:122646926	72	3	3	0.041667	0.0100188
chr11:122646926-122660016	+	chr11:122646926	72	4	3	0.041667	0.0100188
chr11:122646926-122669742	+	chr11:122646926	72	5	3	0.041667	0.0100188
chr11:122665409-122669742	+	chr11:122665409	8	1	4	0.5	0.0133583
chr11:122665409-122672040	+	chr11:122665409	8	2	4	0.5	0.0133583
chr11:123464789-123465546	+	chr11:123464789	35	1	33	0.942857	0.110206
chr11:123464789-123474249	+	chr11:123464789	35	2	2	0.057143	0.00667917
chr11:125875653-125893432	-	chr11:125893432	7	1	4	0.571429	0.0133583
chr11:125871613-125893432	-	chr11:125893432	7	2	3	0.428571	0.0100188
chr11:126275990-126279306	+	chr11:126275990	8	1	6	0.75	0.0200375
chr11:126275990-126283543	+	chr11:126275990	8	2	2	0.25	0.00667917
chr11:128354717-128360471	-	chr11:128360471	30	1	16	0.533333	0.0534334
chr11:128350085-128360471	-	chr11:128360471	30	2	14	0.466667	0.0467542
chr11:12883796-12886447	+	chr11:12883796	9	1	8	0.888889	0.0267167
chr11:12883796-12904672	+	chr11:12883796	9	2	1	0.111111	0.00333959
chr11:128993340-128994789	-	chr11:128994789	37	1	27	0.72973	0.0901688
chr11:128963515-128994789	-	chr11:128994789	37	2	8	0.216216	0.0267167
chr11:128932174-128994789	-	chr11:128994789	37	3	2	0.054054	0.00667917
chr11:128993340-129034322	-	chr11:129034322	9	1	5	0.555556	0.0166979
chr11:129034213-129034322	-	chr11:129034322	9	2	3	0.333333	0.0100188
chr11:128910822-129034322	-	chr11:129034322	9	3	1	0.111111	0.00333959
chr11:130108338-130109791	-	chr11:130109791	5	1	4	0.8	0.0133583
chr11:130106687-130109791	-	chr11:130109791	5	2	1	0.2	0.00333959
chr1:113140592-113153625	-	chr1:113153625	3	1	2	0.666667	0.00667917
chr1:113153462-113153625	-	chr1:113153625	3	2	1	0.333333	0.00333959
chr1:113098489-113159517	-	chr1:113159517	4	1	3	0.75	0.0100188
chr1:113153462-113159517	-	chr1:113159517	4	2	1	0.25	0.00333959
chr1:113459799-113471974	-	chr1:113471974	4	1	2	0.5	0.00667917
chr1:113464611-113471974	-	chr1:113471974	4	2	2	0.5	0.00667917
chr1:113633939-113662145	+	chr1:113633939	5	1	2	0.4	0.00667917
chr1:113633939-113638987	+	chr1:113633939	5	2	1	0.2	0.00333959
chr1:113633939-113641407	+	chr1:113633939	5	3	1	0.2	0.00333959
chr1:113633939-113650379	+	chr1:113633939	5	4	1	0.2	0.00333959
chr1:113655100-113662145	+	chr1:113655100	10	1	9	0.9	0.0300563
chr1:113655100-113659058	+	chr1:113655100	10	2	1	0.1	0.00333959
chr11:16863093-16877461	-	chr11:16877461	2	1	1	0.5	0.00333959
chr11:16872737-16877461	-	chr11:16877461	2	2	1	0.5	0.00333959
chr11:16876435-16892729	-	chr11:16892729	14	1	9	0.642857	0.0300563
chr11:16863093-16892729	-	chr11:16892729	14	2	5	0.357143	0.0166979
chr1:117944807-117963271	+	chr1:117944807	61	1	46	0.754098	0.153621
chr1:117944807-117957453	+	chr1:117944807	61	2	8	0.131148	0.0267167
chr1:117944807-117984947	+	chr1:117944807	61	3	7	0.114754	0.0233771
chr1:118003110-118045592	+	chr1:118003110	14	1	13	0.928571	0.0434146
chr1:118003110-118009049	+	chr1:118003110	14	2	1	0.071429	0.00333959
chr11:18528403-18531212	-	chr11:18531212	18	1	12	0.666667	0.040075
chr11:18524032-18531212	-	chr11:18531212	18	2	6	0.333333	0.0200375
chr11:18536224-18541150	-	chr11:18541150	15	1	14	0.933333	0.0467542
chr11:18528403-18541150	-	chr11:18541150	15	2	1	0.066667	0.00333959
chr11:18591760-18600355	-	chr11:18600355	8	1	6	0.75	0.0200375
chr11:18586438-18600355	-	chr11:18600355	8	2	2	0.25	0.00667917
chr11:19164524-19173867	+	chr11:19164524	2	1	1	0.5	0.00333959
chr11:19164524-19187932	+	chr11:19164524	2	2	1	0.5	0.00333959
chr11:20083852-20104725	+	chr11:20083852	6	1	4	0.666667	0.0133583
chr11:20083852-20089944	+	chr11:20083852	6	2	2	0.333333	0.00667917
chr1:1192371-1203372	-	chr1:1203372	12	1	10	0.833333	0.0333959
chr1:1191424-1203372	-	chr1:1203372	12	2	2	0.166667	0.00667917
chr11:20424464-20429578	+	chr11:20424464	3	1	2	0.666667	0.00667917
chr11:20424464-20448411	+	chr11:20424464	3	2	1	0.333333	0.00333959
chr1:12335881-12338095	+	chr1:12335881	14	1	13	0.928571	0.0434146
chr1:12335881-12339707	+	chr1:12335881	14	2	1	0.071429	0.00333959
chr1:12378128-12393423	+	chr1:12378128	5	1	3	0.6	0.0100188
chr1:12378128-12382803	+	chr1:12378128	5	2	1	0.2	0.00333959
chr1:12378128-12383837	+	chr1:12378128	5	3	1	0.2	0.00333959
chr1:12638745-12639440	-	chr1:12639440	123	1	117	0.95122	0.390731
chr1:12632755-12639440	-	chr1:12639440	123	2	6	0.04878	0.0200375
chr1:12638745-12640694	-	chr1:12640694	7	1	5	0.714286	0.0166979
chr1:12632755-12640694	-	chr1:12640694	7	2	2	0.285714	0.00667917
chr11:27412640-27434407	-	chr11:27434407	21	1	20	0.952381	0.0667917
chr11:27395097-27434407	-	chr11:27434407	21	2	1	0.047619	0.00333959
chr11:28080472-28084063	-	chr11:28084063	9	1	5	0.555556	0.0166979
chr11:28056933-28084063	-	chr11:28084063	9	2	4	0.444444	0.0133583
chr11:28250417-28252532	+	chr11:28250417	11	1	7	0.636364	0.0233771
chr11:28250417-28318478	+	chr11:28250417	11	2	4	0.363636	0.0133583
chr11:2997253-3000467	-	chr11:3000467	10	1	7	0.7	0.0233771
chr11:2972488-3000467	-	chr11:3000467	10	2	2	0.2	0.00667917
chr11:2991032-3000467	-	chr11:3000467	10	3	1	0.1	0.00333959
chr11:32948702-32956981	+	chr11:32948702	38	1	19	0.5	0.0634521
chr11:32948702-32949669	+	chr11:32948702	38	2	16	0.421053	0.0534334
chr11:32948702-32977667	+	chr11:32948702	38	3	1	0.026316	0.00333959
chr11:32948702-32979632	+	chr11:32948702	38	4	1	0.026316	0.00333959
chr11:32948702-32996889	+	chr11:32948702	38	5	1	0.026316	0.00333959
chr11:33307958-33309057	+	chr11:33307958	704	1	699	0.992898	2.33437
chr11:33307958-33350179	+	chr11:33307958	704	2	5	0.007102	0.0166979
chr11:33581294-33605047	+	chr11:33581294	33	1	32	0.969697	0.106867
chr11:33581294-33631512	+	chr11:33581294	33	2	1	0.030303	0.00333959
chr11:34093272-34098189	+	chr11:34093272	24	1	17	0.708333	0.056773
chr11:34093272-34101312	+	chr11:34093272	24	2	6	0.25	0.0200375
chr11:34093272-34104588	+	chr11:34093272	24	3	1	0.041667	0.00333959
chr11:34101174-34107960	+	chr11:34101174	10	1	5	0.5	0.0166979
chr11:34101174-34111003	+	chr11:34101174	10	2	5	0.5	0.0166979
chr11:34129757-34149146	+	chr11:34129757	9	1	6	0.666667	0.0200375
chr11:34129757-34140050	+	chr11:34129757	9	2	3	0.333333	0.0100188
chr11:34952950-35006275	+	chr11:34952950	5	1	3	0.6	0.0100188
chr11:34952950-34999729	+	chr11:34952950	5	2	2	0.4	0.00667917
chr11:34978930-34999729	+	chr11:34978930	11	1	8	0.727273	0.0267167
chr11:34978930-35006275	+	chr11:34978930	11	2	3	0.272727	0.0100188
chr11:35208378-35211612	+	chr11:35208378	6	1	5	0.833333	0.0166979
chr11:35208378-35243279	+	chr11:35208378	6	2	1	0.166667	0.00333959
chr11:3712576-3714605	-	chr11:3714605	15	1	12	0.8	0.040075
chr11:3697738-3714605	-	chr11:3714605	15	2	3	0.2	0.0100188
chr11:3697738-3716836	-	chr11:3716836	6	1	5	0.833333	0.0166979
chr11:3712576-3716836	-	chr11:3716836	6	2	1	0.166667	0.00333959
chr11:3752620-3774638	-	chr11:3774638	49	1	39	0.795918	0.130244
chr11:3756420-3774638	-	chr11:3774638	49	2	9	0.183673	0.0300563
chr11:3723692-3774638	-	chr11:3774638	49	3	1	0.020408	0.00333959
chr11:3789810-3789974	-	chr11:3789974	89	1	79	0.88764	0.263827
chr11:3784131-3789974	-	chr11:3789974	89	2	10	0.11236	0.0333959
chr11:3789810-3797251	-	chr11:3797251	44	1	29	0.659091	0.096848
chr11:3784131-3797251	-	chr11:3797251	44	2	6	0.136364	0.0200375
chr11:3794861-3797251	-	chr11:3797251	44	3	5	0.113636	0.0166979
chr11:3792977-3797251	-	chr11:3797251	44	4	2	0.045455	0.00667917
chr11:3797111-3797251	-	chr11:3797251	44	5	2	0.045455	0.00667917
chr11:3784131-3803375	-	chr11:3803375	3	1	2	0.666667	0.00667917
chr11:3797111-3803375	-	chr11:3803375	3	2	1	0.333333	0.00333959
chr1:14042035-14068652	+	chr1:14042035	6	1	4	0.666667	0.0133583
chr1:14042035-14075982	+	chr1:14042035	6	2	2	0.333333	0.00667917
chr1:14057494-14068652	+	chr1:14057494	18	1	17	0.944444	0.056773
chr1:14057494-14075982	+	chr1:14057494	18	2	1	0.055556	0.00333959
chr11:4091255-4091433	+	chr11:4091255	11	1	8	0.727273	0.0267167
chr11:4091255-4107773	+	chr11:4091255	11	2	3	0.272727	0.0100188
chr11:4128664-4133292	+	chr11:4128664	3	1	2	0.666667	0.00667917
chr11:4128664-4130933	+	chr11:4128664	3	2	1	0.333333	0.00333959
chr11:43425547-43429127	+	chr11:43425547	3	1	1	0.333333	0.00333959
chr11:43425547-43436326	+	chr11:43425547	3	2	1	0.333333	0.00333959
chr11:43425547-43472815	+	chr11:43425547	3	3	1	0.333333	0.00333959
chr11:44129232-44135851	+	chr11:44129232	45	1	23	0.511111	0.0768105
chr11:44129232-44151688	+	chr11:44129232	45	2	11	0.244444	0.0367354
chr11:44129232-44193292	+	chr11:44129232	45	3	11	0.244444	0.0367354
chr1:145646114-145663367	+	chr1:145646114	6	1	4	0.666667	0.0133583
chr1:145646114-145684678	+	chr1:145646114	6	2	1	0.166667	0.00333959
chr1:145646114-145687091	+	chr1:145646114	6	3	1	0.166667	0.00333959
chr11:460186-473977	+	chr11:460186	6	1	3	0.5	0.0100188
chr11:460186-479152	+	chr11:460186	6	2	3	0.5	0.0100188
chr11:46515157-46515754	-	chr11:46515754	76	1	74	0.973684	0.247129
chr11:46455023-46515754	-	chr11:46515754	76	2	2	0.026316	0.00667917
chr11:46515157-46529920	-	chr11:46529920	140	1	134	0.957143	0.447504
chr11:46529740-46529920	-	chr11:46529920	140	2	6	0.042857	0.0200375
chr11:46515157-46534363	-	chr11:46534363	61	1	54	0.885246	0.180338
chr11:46529740-46534363	-	chr11:46534363	61	2	7	0.114754	0.0233771
chr11:46515157-46570050	-	chr11:46570050	30	1	14	0.466667	0.0467542
chr11:46568662-46570050	-	chr11:46570050	30	2	9	0.3	0.0300563
chr11:46565524-46570050	-	chr11:46570050	30	3	4	0.133333	0.0133583
chr11:46563494-46570050	-	chr11:46570050	30	4	3	0.1	0.0100188
chr1:147120047-147131890	-	chr1:147131890	5	1	3	0.6	0.0100188
chr1:147121945-147131890	-	chr1:147131890	5	2	2	0.4	0.00667917
chr11:47187818-47189802	-	chr11:47189802	8	1	7	0.875	0.0233771
chr11:47189459-47189802	-	chr11:47189802	8	2	1	0.125	0.00333959
chr11:47237886-47260472	+	chr11:47237886	4	1	3	0.75	0.0100188
chr11:47237886-47254510	+	chr11:47237886	4	2	1	0.25	0.00333959
chr11:47504246-47510576	-	chr11:47510576	18	1	5	0.277778	0.0166979
chr11:47505940-47510576	-	chr11:47510576	18	2	5	0.277778	0.0166979
chr11:47493742-47510576	-	chr11:47510576	18	3	4	0.222222	0.0133583
chr11:47505004-47510576	-	chr11:47510576	18	4	2	0.111111	0.00667917
chr11:47508301-47510576	-	chr11:47510576	18	5	2	0.111111	0.00667917
chr11:47647225-47648679	-	chr11:47648679	7	1	6	0.857143	0.0200375
chr11:47644252-47648679	-	chr11:47648679	7	2	1	0.142857	0.00333959
chr11:47745579-47786914	-	chr11:47786914	3	1	2	0.666667	0.00667917
chr11:47786821-47786914	-	chr11:47786914	3	2	1	0.333333	0.00333959
chr11:47857202-47859175	-	chr11:47859175	28	1	20	0.714286	0.0667917
chr11:47843275-47859175	-	chr11:47859175	28	2	8	0.285714	0.0267167
chr1:150390071-150390201	+	chr1:150390071	2	1	1	0.5	0.00333959
chr1:150390071-150418877	+	chr1:150390071	2	2	1	0.5	0.00333959
chr1:150464886-150469384	+	chr1:150464886	25	1	21	0.84	0.0701313
chr1:150464886-150470223	+	chr1:150464886	25	2	4	0.16	0.0133583
chr1:150921597-150922001	+	chr1:150921597	9	1	5	0.555556	0.0166979
chr1:150921597-150931823	+	chr1:150921597	9	2	4	0.444444	0.0133583
chr1:150997086-150999803	+	chr1:150997086	18	1	10	0.555556	0.0333959
chr1:150997086-151001420	+	chr1:150997086	18	2	5	0.277778	0.0166979
chr1:150997086-150998149	+	chr1:150997086	18	3	3	0.166667	0.0100188
chr1:151196720-151205179	+	chr1:151196720	5	1	4	0.8	0.0133583
chr1:151196720-151215043	+	chr1:151196720	5	2	1	0.2	0.00333959
chr1:151276016-151278839	-	chr1:151278839	7	1	5	0.714286	0.0166979
chr1:151278611-151278839	-	chr1:151278839	7	2	2	0.285714	0.00667917
chr1:151266493-151297393	-	chr1:151297393	2	1	1	0.5	0.00333959
chr1:151274319-151297393	-	chr1:151297393	2	2	1	0.5	0.00333959
chr1:151400298-151414681	-	chr1:151414681	25	1	15	0.6	0.0500938
chr1:151395872-151414681	-	chr1:151414681	25	2	10	0.4	0.0333959
chr1:151611363-151611595	+	chr1:151611363	68	1	33	0.485294	0.110206
chr1:151611363-151641111	+	chr1:151611363	68	2	27	0.397059	0.0901688
chr1:151611363-151655921	+	chr1:151611363	68	3	7	0.102941	0.0233771
chr1:151611363-151633338	+	chr1:151611363	68	4	1	0.014706	0.00333959
chr1:151630710-151641111	+	chr1:151630710	13	1	11	0.846154	0.0367354
chr1:151630710-151655921	+	chr1:151630710	13	2	1	0.076923	0.00333959
chr1:151630710-151665959	+	chr1:151630710	13	3	1	0.076923	0.00333959
chr1:153723570-153730239	+	chr1:153723570	32	1	28	0.875	0.0935084
chr1:153723570-153724884	+	chr1:153723570	32	2	4	0.125	0.0133583
chr1:153909963-153910339	-	chr1:153910339	4	1	3	0.75	0.0100188
chr1:153904679-153910339	-	chr1:153910339	4	2	1	0.25	0.00333959
chr1:154221714-154224129	+	chr1:154221714	12	1	11	0.916667	0.0367354
chr1:154221714-154229910	+	chr1:154221714	12	2	1	0.083333	0.00333959
chr1:154223516-154224129	+	chr1:154223516	17	1	11	0.647059	0.0367354
chr1:154223516-154229910	+	chr1:154223516	17	2	6	0.352941	0.0200375
chr1:154569280-154575102	-	chr1:154575102	4	1	2	0.5	0.00667917
chr1:154573516-154575102	-	chr1:154575102	4	2	2	0.5	0.00667917
chr1:155408117-155408859	-	chr1:155408859	13	1	12	0.923077	0.040075
chr1:155385534-155408859	-	chr1:155408859	13	2	1	0.076923	0.00333959
chr1:155385534-155429689	-	chr1:155429689	9	1	8	0.888889	0.0267167
chr1:155365249-155429689	-	chr1:155429689	9	2	1	0.111111	0.00333959
chr1:155447676-155491409	-	chr1:155491409	9	1	8	0.888889	0.0267167
chr1:155490890-155491409	-	chr1:155491409	9	2	1	0.111111	0.00333959
chr1:155644800-155649303	-	chr1:155649303	46	1	41	0.891304	0.136923
chr1:155646338-155649303	-	chr1:155649303	46	2	5	0.108696	0.0166979
chr1:155679563-155691409	+	chr1:155679563	19	1	9	0.473684	0.0300563
chr1:155679563-155686919	+	chr1:155679563	19	2	6	0.315789	0.0200375
chr1:155679563-155701206	+	chr1:155679563	19	3	4	0.210526	0.0133583
chr1:155631097-155747611	-	chr1:155747611	2	1	1	0.5	0.00333959
chr1:155740857-155747611	-	chr1:155747611	2	2	1	0.5	0.00333959
chr1:155895422-155896947	-	chr1:155896947	15	1	7	0.466667	0.0233771
chr1:155896466-155896947	-	chr1:155896947	15	2	7	0.466667	0.0233771
chr1:155893417-155896947	-	chr1:155896947	15	3	1	0.066667	0.00333959
chr1:156303337-156304709	-	chr1:156304709	124	1	117	0.943548	0.390731
chr1:156290629-156304709	-	chr1:156304709	124	2	5	0.040323	0.0166979
chr1:156294762-156304709	-	chr1:156304709	124	3	2	0.016129	0.00667917
chr1:156286956-156305679	-	chr1:156305679	8	1	4	0.5	0.0133583
chr1:156288658-156305679	-	chr1:156305679	8	2	4	0.5	0.0133583
chr1:156954130-156955965	-	chr1:156955965	10	1	7	0.7	0.0233771
chr1:156937778-156955965	-	chr1:156955965	10	2	3	0.3	0.0100188
chr11:57563048-57569668	+	chr11:57563048	6	1	4	0.666667	0.0133583
chr11:57563048-57564464	+	chr11:57563048	6	2	2	0.333333	0.00667917
chr1:15860731-15874923	+	chr1:15860731	5	1	3	0.6	0.0100188
chr1:15860731-15873366	+	chr1:15860731	5	2	1	0.2	0.00333959
chr1:15860731-15893764	+	chr1:15860731	5	3	1	0.2	0.00333959
chr1:15956819-15970145	+	chr1:15956819	10	1	6	0.6	0.0200375
chr1:15956819-15978390	+	chr1:15956819	10	2	4	0.4	0.0133583
chr1:160293220-160302347	-	chr1:160302347	32	1	30	0.9375	0.100188
chr1:160276952-160302347	-	chr1:160302347	32	2	2	0.0625	0.00667917
chr11:61096834-61097546	-	chr11:61097546	40	1	24	0.6	0.08015
chr11:61094250-61097546	-	chr11:61097546	40	2	15	0.375	0.0500938
chr11:61089066-61097546	-	chr11:61097546	40	3	1	0.025	0.00333959
chr11:61188861-61196762	-	chr11:61196762	4	1	3	0.75	0.0100188
chr11:61183137-61196762	-	chr11:61196762	4	2	1	0.25	0.00333959
chr1:161293403-161298287	+	chr1:161293403	14	1	7	0.5	0.0233771
chr1:161293403-161310445	+	chr1:161293403	14	2	7	0.5	0.0233771
chr11:61574135-61578547	-	chr11:61578547	17	1	16	0.941176	0.0534334
chr11:61578222-61578547	-	chr11:61578547	17	2	1	0.058824	0.00333959
chr11:61630443-61631258	+	chr11:61630443	19	1	15	0.789474	0.0500938
chr11:61630443-61630850	+	chr11:61630443	19	2	2	0.105263	0.00667917
chr11:61630443-61632749	+	chr11:61630443	19	3	2	0.105263	0.00667917
chr11:62406454-62407203	-	chr11:62407203	25	1	23	0.92	0.0768105
chr11:62400036-62407203	-	chr11:62407203	25	2	2	0.08	0.00667917
chr1:162535801-162567648	+	chr1:162535801	10	1	7	0.7	0.0233771
chr1:162535801-162536138	+	chr1:162535801	10	2	2	0.2	0.00667917
chr1:162535801-162551249	+	chr1:162535801	10	3	1	0.1	0.00333959
chr11:62622359-62622688	-	chr11:62622688	4	1	3	0.75	0.0100188
chr11:62621272-62622688	-	chr11:62622688	4	2	1	0.25	0.00333959
chr11:63960549-63967765	+	chr11:63960549	11	1	6	0.545455	0.0200375
chr11:63960549-63965446	+	chr11:63960549	11	2	5	0.454545	0.0166979
chr11:64695273-64698061	+	chr11:64695273	5	1	3	0.6	0.0100188
chr11:64695273-64695630	+	chr11:64695273	5	2	2	0.4	0.00667917
chr1:165859440-165860559	+	chr1:165859440	78	1	68	0.871795	0.227092
chr1:165859440-165865569	+	chr1:165859440	78	2	10	0.128205	0.0333959
chr11:66006274-66006748	+	chr11:66006274	109	1	108	0.990826	0.360675
chr11:66006274-66010502	+	chr11:66006274	109	2	1	0.009174	0.00333959
chr1:16632297-16641930	-	chr1:16641930	10	1	8	0.8	0.0267167
chr1:16621277-16641930	-	chr1:16641930	10	2	2	0.2	0.00667917
chr11:66526513-66595835	+	chr11:66526513	7	1	5	0.714286	0.0166979
chr11:66526513-66583670	+	chr11:66526513	7	2	2	0.285714	0.00667917
chr11:66571465-66595835	+	chr11:66571465	16	1	13	0.8125	0.0434146
chr11:66571465-66590145	+	chr11:66571465	16	2	3	0.1875	0.0100188
chr11:66583523-66595835	+	chr11:66583523	25	1	21	0.84	0.0701313
chr11:66583523-66590145	+	chr11:66583523	25	2	4	0.16	0.0133583
chr11:66589113-66595835	+	chr11:66589113	57	1	33	0.578947	0.110206
chr11:66589113-66590145	+	chr11:66589113	57	2	24	0.421053	0.08015
chr1:167988782-167992285	+	chr1:167988782	41	1	38	0.926829	0.126904
chr1:167988782-168014465	+	chr1:167988782	41	2	3	0.073171	0.0100188
chr1:168007608-168014465	+	chr1:168007608	12	1	11	0.916667	0.0367354
chr1:168007608-168037701	+	chr1:168007608	12	2	1	0.083333	0.00333959
chr11:68115314-68125315	+	chr11:68115314	17	1	8	0.470588	0.0267167
chr11:68115314-68133170	+	chr11:68115314	17	2	7	0.411765	0.0233771
chr11:68115314-68131411	+	chr11:68115314	17	3	2	0.117647	0.00667917
chr11:68125117-68133170	+	chr11:68125117	11	1	8	0.727273	0.0267167
chr11:68125117-68183995	+	chr11:68125117	11	2	3	0.272727	0.0100188
chr11:68190956-68193655	+	chr11:68190956	11	1	8	0.727273	0.0267167
chr11:68190956-68207384	+	chr11:68190956	11	2	3	0.272727	0.0100188
chr1:168204338-168208398	+	chr1:168204338	4	1	3	0.75	0.0100188
chr1:168204338-168204420	+	chr1:168204338	4	2	1	0.25	0.00333959
chr1:168260397-168269721	+	chr1:168260397	2	1	1	0.5	0.00333959
chr1:168260397-168274434	+	chr1:168260397	2	2	1	0.5	0.00333959
chr11:68272612-68363686	+	chr11:68272612	6	1	3	0.5	0.0100188
chr11:68272612-68287119	+	chr11:68272612	6	2	2	0.333333	0.00667917
chr11:68272612-68312492	+	chr11:68272612	6	3	1	0.166667	0.00333959
chr11:68286968-68315672	+	chr11:68286968	12	1	7	0.583333	0.0233771
chr11:68286968-68326147	+	chr11:68286968	12	2	4	0.333333	0.0133583
chr11:68286968-68318654	+	chr11:68286968	12	3	1	0.083333	0.00333959
chr11:68305126-68305359	+	chr11:68305126	2	1	1	0.5	0.00333959
chr11:68305126-68315672	+	chr11:68305126	2	2	1	0.5	0.00333959
chr11:68350510-68363686	+	chr11:68350510	3	1	2	0.666667	0.00667917
chr11:68350510-68370960	+	chr11:68350510	3	2	1	0.333333	0.00333959
chr11:68529002-68529155	-	chr11:68529155	41	1	21	0.512195	0.0701313
chr11:68527036-68529155	-	chr11:68529155	41	2	12	0.292683	0.040075
chr11:68527692-68529155	-	chr11:68529155	41	3	8	0.195122	0.0267167
chr11:68571467-68580044	-	chr11:68580044	8	1	7	0.875	0.0233771
chr11:68548107-68580044	-	chr11:68580044	8	2	1	0.125	0.00333959
chr11:70118278-70194526	+	chr11:70118278	6	1	5	0.833333	0.0166979
chr11:70118278-70224301	+	chr11:70118278	6	2	1	0.166667	0.00333959
chr11:70176278-70194526	+	chr11:70176278	17	1	13	0.764706	0.0434146
chr11:70176278-70181800	+	chr11:70176278	17	2	4	0.235294	0.0133583
chr11:70200406-70202360	+	chr11:70200406	33	1	19	0.575758	0.0634521
chr11:70200406-70208594	+	chr11:70200406	33	2	14	0.424242	0.0467542
chr11:70251370-70253697	+	chr11:70251370	21	1	18	0.857143	0.0601125
chr11:70251370-70260758	+	chr11:70251370	21	2	3	0.142857	0.0100188
chr11:70644547-70653276	-	chr11:70653276	7	1	5	0.714286	0.0166979
chr11:70505932-70653276	-	chr11:70653276	7	2	1	0.142857	0.00333959
chr11:70544792-70653276	-	chr11:70653276	7	3	1	0.142857	0.00333959
chr11:70858165-70935842	-	chr11:70935842	11	1	5	0.454545	0.0166979
chr11:70935742-70935842	-	chr11:70935842	11	2	4	0.363636	0.0133583
chr11:70820986-70935842	-	chr11:70935842	11	3	2	0.181818	0.00667917
chr1:171491315-171492661	+	chr1:171491315	8	1	5	0.625	0.0166979
chr1:171491315-171494104	+	chr1:171491315	8	2	3	0.375	0.0100188
chr1:171537385-171544267	+	chr1:171537385	24	1	17	0.708333	0.056773
chr1:171537385-171540560	+	chr1:171537385	24	2	7	0.291667	0.0233771
chr11:71693806-71701763	+	chr11:71693806	47	1	34	0.723404	0.113546
chr11:71693806-71698157	+	chr11:71693806	47	2	13	0.276596	0.0434146
chr1:1721833-1722035	-	chr1:1722035	7	1	6	0.857143	0.0200375
chr1:1720491-1722035	-	chr1:1722035	7	2	1	0.142857	0.00333959
chr1:172520651-172560211	+	chr1:172520651	14	1	10	0.714286	0.0333959
chr1:172520651-172539870	+	chr1:172520651	14	2	2	0.142857	0.00667917
chr1:172520651-172548407	+	chr1:172520651	14	3	2	0.142857	0.00667917
chr1:1735857-1737977	-	chr1:1737977	281	1	275	0.978648	0.918386
chr1:1724683-1737977	-	chr1:1737977	281	2	6	0.021352	0.0200375
chr11:73849764-73850873	-	chr11:73850873	28	1	14	0.5	0.0467542
chr11:73843888-73850873	-	chr11:73850873	28	2	13	0.464286	0.0434146
chr11:73785297-73850873	-	chr11:73850873	28	3	1	0.035714	0.00333959
chr1:173961892-173962273	-	chr1:173962273	29	1	24	0.827586	0.08015
chr1:173915613-173962273	-	chr1:173962273	29	2	4	0.137931	0.0133583
chr1:173949946-173962273	-	chr1:173962273	29	3	1	0.034483	0.00333959
chr11:73984589-73997436	-	chr11:73997436	7	1	6	0.857143	0.0200375
chr11:73996853-73997436	-	chr11:73997436	7	2	1	0.142857	0.00333959
chr11:73988029-74013637	-	chr11:74013637	7	1	5	0.714286	0.0166979
chr11:74000123-74013637	-	chr11:74013637	7	2	2	0.285714	0.00667917
chr11:74554394-74563127	-	chr11:74563127	12	1	8	0.666667	0.0267167
chr11:74559159-74563127	-	chr11:74563127	12	2	4	0.333333	0.0133583
chr1:1735857-1749314	-	chr1:1749314	65	1	39	0.6	0.130244
chr1:1737913-1749314	-	chr1:1749314	65	2	11	0.169231	0.0367354
chr1:1720491-1749314	-	chr1:1749314	65	3	10	0.153846	0.0333959
chr1:1747194-1749314	-	chr1:1749314	65	4	5	0.076923	0.0166979
chr1:1747194-1756938	-	chr1:1756938	74	1	66	0.891892	0.220413
chr1:1735857-1756938	-	chr1:1756938	74	2	7	0.094595	0.0233771
chr1:1718760-1756938	-	chr1:1756938	74	3	1	0.013514	0.00333959
chr1:176085759-176105683	-	chr1:176105683	18	1	9	0.5	0.0300563
chr1:176050287-176105683	-	chr1:176105683	18	2	8	0.444444	0.0267167
chr1:176012321-176105683	-	chr1:176105683	18	3	1	0.055556	0.00333959
chr1:176145045-176153828	-	chr1:176153828	25	1	18	0.72	0.0601125
chr1:176118141-176153828	-	chr1:176153828	25	2	6	0.24	0.0200375
chr1:176132950-176153828	-	chr1:176153828	25	3	1	0.04	0.00333959
chr11:76207258-76227356	+	chr11:76207258	2	1	1	0.5	0.00333959
chr11:76207258-76239510	+	chr11:76207258	2	2	1	0.5	0.00333959
chr11:76224429-76239510	+	chr11:76224429	13	1	8	0.615385	0.0267167
chr11:76224429-76227356	+	chr11:76224429	13	2	4	0.307692	0.0133583
chr11:76224429-76248994	+	chr11:76224429	13	3	1	0.076923	0.00333959
chr11:76696686-76709865	+	chr11:76696686	10	1	9	0.9	0.0300563
chr11:76696686-76701618	+	chr11:76696686	10	2	1	0.1	0.00333959
chr1:1747194-1770677	-	chr1:1770677	87	1	48	0.551724	0.1603
chr1:1735857-1770677	-	chr1:1770677	87	2	19	0.218391	0.0634521
chr1:1756835-1770677	-	chr1:1770677	87	3	16	0.183908	0.0534334
chr1:1718373-1770677	-	chr1:1770677	87	4	2	0.022989	0.00667917
chr1:1737913-1770677	-	chr1:1770677	87	5	2	0.022989	0.00667917
chr11:77336007-77336863	-	chr11:77336863	24	1	13	0.541667	0.0434146
chr11:77330650-77336863	-	chr11:77336863	24	2	11	0.458333	0.0367354
chr11:77336007-77340944	-	chr11:77340944	19	1	10	0.526316	0.0333959
chr11:77330650-77340944	-	chr11:77340944	19	2	7	0.368421	0.0233771
chr11:77333544-77340944	-	chr11:77340944	19	3	2	0.105263	0.00667917
chr11:77402203-77404656	-	chr11:77404656	76	1	36	0.473684	0.120225
chr11:77394754-77404656	-	chr11:77404656	76	2	24	0.315789	0.08015
chr11:77396149-77404656	-	chr11:77404656	76	3	16	0.210526	0.0534334
chr11:77824931-77825438	-	chr11:77825438	3	1	2	0.666667	0.00667917
chr11:77823695-77825438	-	chr11:77825438	3	2	1	0.333333	0.00333959
chr11:77830227-77832220	-	chr11:77832220	9	1	6	0.666667	0.0200375
chr11:77815025-77832220	-	chr11:77832220	9	2	2	0.222222	0.00667917
chr11:77824931-77832220	-	chr11:77832220	9	3	1	0.111111	0.00333959
chr11:77815025-77835260	-	chr11:77835260	2	1	1	0.5	0.00333959
chr11:77830227-77835260	-	chr11:77835260	2	2	1	0.5	0.00333959
chr11:77830227-77838482	-	chr11:77838482	9	1	6	0.666667	0.0200375
chr11:77823695-77838482	-	chr11:77838482	9	2	3	0.333333	0.0100188
chr11:77910640-77911280	+	chr11:77910640	5	1	4	0.8	0.0133583
chr11:77910640-77911854	+	chr11:77910640	5	2	1	0.2	0.00333959
chr11:78176921-78204241	-	chr11:78204241	21	1	16	0.761905	0.0534334
chr11:78180292-78204241	-	chr11:78204241	21	2	4	0.190476	0.0133583
chr11:78204108-78204241	-	chr11:78204241	21	3	1	0.047619	0.00333959
chr1:178252698-178269253	+	chr1:178252698	51	1	42	0.823529	0.140263
chr1:178252698-178423783	+	chr1:178252698	51	2	9	0.176471	0.0300563
chr11:78277177-78282489	-	chr11:78282489	10	1	3	0.3	0.0100188
chr11:78180292-78282489	-	chr11:78282489	10	2	2	0.2	0.00667917
chr11:78270584-78282489	-	chr11:78282489	10	3	2	0.2	0.00667917
chr11:78176921-78282489	-	chr11:78282489	10	4	1	0.1	0.00333959
chr11:78239887-78282489	-	chr11:78282489	10	5	1	0.1	0.00333959
chr11:78279677-78282489	-	chr11:78282489	10	6	1	0.1	0.00333959
chr1:179081443-179091002	-	chr1:179091002	23	1	12	0.521739	0.040075
chr1:179089324-179091002	-	chr1:179091002	23	2	11	0.478261	0.0367354
chr1:179100445-179100616	-	chr1:179100616	9	1	8	0.888889	0.0267167
chr1:179087721-179100616	-	chr1:179100616	9	2	1	0.111111	0.00333959
chr1:179306971-179312078	+	chr1:179306971	4	1	3	0.75	0.0100188
chr1:179306971-179319566	+	chr1:179306971	4	2	1	0.25	0.00333959
chr1:179310162-179312078	+	chr1:179310162	10	1	7	0.7	0.0233771
chr1:179310162-179319566	+	chr1:179310162	10	2	3	0.3	0.0100188
chr1:179316734-179319566	+	chr1:179316734	25	1	18	0.72	0.0601125
chr1:179316734-179318077	+	chr1:179316734	25	2	7	0.28	0.0233771
chr1:179972308-179975702	+	chr1:179972308	4	1	2	0.5	0.00667917
chr1:179972308-179993717	+	chr1:179972308	4	2	2	0.5	0.00667917
chr1:180772523-180780624	+	chr1:180772523	18	1	12	0.666667	0.040075
chr1:180772523-180794480	+	chr1:180772523	18	2	6	0.333333	0.0200375
chr1:180793888-180794480	+	chr1:180793888	4	1	2	0.5	0.00667917
chr1:180793888-180843078	+	chr1:180793888	4	2	2	0.5	0.00667917
chr1:180804009-180849433	+	chr1:180804009	4	1	3	0.75	0.0100188
chr1:180804009-180843078	+	chr1:180804009	4	2	1	0.25	0.00333959
chr1:180953812-180962561	-	chr1:180962561	40	1	38	0.95	0.126904
chr1:180957374-180962561	-	chr1:180962561	40	2	2	0.05	0.00667917
chr1:180953812-180974599	-	chr1:180974599	22	1	15	0.681818	0.0500938
chr1:180971741-180974599	-	chr1:180974599	22	2	7	0.318182	0.0233771
chr11:82917099-82947551	+	chr11:82917099	18	1	13	0.722222	0.0434146
chr11:82917099-82922472	+	chr11:82917099	18	2	5	0.277778	0.0166979
chr1:184703664-184718726	-	chr1:184718726	9	1	6	0.666667	0.0200375
chr1:184701970-184718726	-	chr1:184718726	9	2	2	0.222222	0.00667917
chr1:184688295-184718726	-	chr1:184718726	9	3	1	0.111111	0.00333959
chr11:85373432-85374645	-	chr11:85374645	2	1	1	0.5	0.00333959
chr11:85374567-85374645	-	chr11:85374645	2	2	1	0.5	0.00333959
chr11:85685750-85692271	-	chr11:85692271	16	1	10	0.625	0.0333959
chr11:85687665-85692271	-	chr11:85692271	16	2	6	0.375	0.0200375
chr11:85685750-85695016	-	chr11:85695016	66	1	58	0.878788	0.193696
chr11:85692787-85695016	-	chr11:85695016	66	2	4	0.060606	0.0133583
chr11:85687665-85695016	-	chr11:85695016	66	3	3	0.045455	0.0100188
chr11:85692171-85695016	-	chr11:85695016	66	4	1	0.015152	0.00333959
chr11:85707868-85714494	-	chr11:85714494	62	1	56	0.903226	0.187017
chr11:85685750-85714494	-	chr11:85714494	62	2	6	0.096774	0.0200375
chr11:85707868-85718626	-	chr11:85718626	6	1	4	0.666667	0.0133583
chr11:85701292-85718626	-	chr11:85718626	6	2	2	0.333333	0.00667917
chr11:85707868-85742653	-	chr11:85742653	206	1	142	0.68932	0.474221
chr11:85685750-85742653	-	chr11:85742653	206	2	30	0.145631	0.100188
chr11:85718584-85742653	-	chr11:85742653	206	3	12	0.058252	0.040075
chr11:85733409-85742653	-	chr11:85742653	206	4	12	0.058252	0.040075
chr11:85701292-85742653	-	chr11:85742653	206	5	4	0.019417	0.0133583
chr11:85711685-85742653	-	chr11:85742653	206	6	4	0.019417	0.0133583
chr11:85722072-85742653	-	chr11:85742653	206	7	2	0.009709	0.00667917
chr1:186359842-186360923	+	chr1:186359842	6	1	5	0.833333	0.0166979
chr1:186359842-186363147	+	chr1:186359842	6	2	1	0.166667	0.00333959
chr1:186862142-186880521	+	chr1:186862142	7	1	5	0.714286	0.0166979
chr1:186862142-186863343	+	chr1:186862142	7	2	1	0.142857	0.00333959
chr1:186862142-186934725	+	chr1:186862142	7	3	1	0.142857	0.00333959
chr11:9225206-9229179	-	chr11:9229179	7	1	6	0.857143	0.0200375
chr11:9199678-9229179	-	chr11:9229179	7	2	1	0.142857	0.00333959
chr1:19238456-19247615	-	chr1:19247615	2	1	1	0.5	0.00333959
chr1:19243396-19247615	-	chr1:19247615	2	2	1	0.5	0.00333959
chr1:193104520-193104719	+	chr1:193104520	3	1	2	0.666667	0.00667917
chr1:193104520-193107303	+	chr1:193104520	3	2	1	0.333333	0.00333959
chr11:93429485-93436085	+	chr11:93429485	9	1	5	0.555556	0.0166979
chr11:93429485-93433352	+	chr11:93429485	9	2	4	0.444444	0.0133583
chr11:9424836-9435958	+	chr11:9424836	7	1	4	0.571429	0.0133583
chr11:9424836-9431633	+	chr11:9424836	7	2	3	0.428571	0.0100188
chr11:9430032-9430186	+	chr11:9430032	3	1	2	0.666667	0.00667917
chr11:9430032-9438695	+	chr11:9430032	3	2	1	0.333333	0.00333959
chr1:19510304-19511780	-	chr1:19511780	8	1	7	0.875	0.0233771
chr1:19495928-19511780	-	chr1:19511780	8	2	1	0.125	0.00333959
chr1:19510304-19514034	-	chr1:19514034	11	1	7	0.636364	0.0233771
chr1:19513033-19514034	-	chr1:19514034	11	2	3	0.272727	0.0100188
chr1:19503085-19514034	-	chr1:19514034	11	3	1	0.090909	0.00333959
chr1:197552281-197586889	-	chr1:197586889	18	1	9	0.5	0.0300563
chr1:197564337-197586889	-	chr1:197586889	18	2	5	0.277778	0.0166979
chr1:197576202-197586889	-	chr1:197586889	18	3	4	0.222222	0.0133583
chr1:197611840-197627499	-	chr1:197627499	20	1	15	0.75	0.0500938
chr1:197621364-197627499	-	chr1:197627499	20	2	4	0.2	0.0133583
chr1:197576202-197627499	-	chr1:197627499	20	3	1	0.05	0.00333959
chr1:197611840-197643299	-	chr1:197643299	4	1	3	0.75	0.0100188
chr1:197552281-197643299	-	chr1:197643299	4	2	1	0.25	0.00333959
chr1:197552281-197684204	-	chr1:197684204	7	1	2	0.285714	0.00667917
chr1:197564337-197684204	-	chr1:197684204	7	2	2	0.285714	0.00667917
chr1:197641166-197684204	-	chr1:197684204	7	3	2	0.285714	0.00667917
chr1:197621364-197684204	-	chr1:197684204	7	4	1	0.142857	0.00333959
chr11:977094-981299	+	chr11:977094	7	1	6	0.857143	0.0200375
chr11:977094-988689	+	chr11:977094	7	2	1	0.142857	0.00333959
chr11:992502-994245	+	chr11:992502	37	1	34	0.918919	0.113546
chr11:992502-1000598	+	chr11:992502	37	2	3	0.081081	0.0100188
chr1:200776503-200784772	+	chr1:200776503	4	1	3	0.75	0.0100188
chr1:200776503-200801973	+	chr1:200776503	4	2	1	0.25	0.00333959
chr1:201816406-201817722	+	chr1:201816406	33	1	27	0.818182	0.0901688
chr1:201816406-201828122	+	chr1:201816406	33	2	4	0.121212	0.0133583
chr1:201816406-201822225	+	chr1:201816406	33	3	1	0.030303	0.00333959
chr1:201816406-201839986	+	chr1:201816406	33	4	1	0.030303	0.00333959
chr1:201821231-201828122	+	chr1:201821231	36	1	29	0.805556	0.096848
chr1:201821231-201826322	+	chr1:201821231	36	2	7	0.194444	0.0233771
chr1:201826223-201828122	+	chr1:201826223	36	1	29	0.805556	0.096848
chr1:201826223-201840455	+	chr1:201826223	36	2	7	0.194444	0.0233771
chr1:201966446-201966682	+	chr1:201966446	10	1	6	0.6	0.0200375
chr1:201966446-201969143	+	chr1:201966446	10	2	4	0.4	0.0133583
chr1:203786053-203787817	+	chr1:203786053	5	1	4	0.8	0.0133583
chr1:203786053-203809502	+	chr1:203786053	5	2	1	0.2	0.00333959
chr1:204494611-204499945	+	chr1:204494611	7	1	5	0.714286	0.0166979
chr1:204494611-204495562	+	chr1:204494611	7	2	2	0.285714	0.00667917
chr1:205277292-205280953	-	chr1:205280953	7	1	6	0.857143	0.0200375
chr1:205275315-205280953	-	chr1:205280953	7	2	1	0.142857	0.00333959
chr12:100598717-100599522	+	chr12:100598717	12	1	7	0.583333	0.0233771
chr12:100598717-100599535	+	chr12:100598717	12	2	5	0.416667	0.0166979
chr12:100676720-100691953	+	chr12:100676720	12	1	10	0.833333	0.0333959
chr12:100676720-100706431	+	chr12:100676720	12	2	1	0.083333	0.00333959
chr12:100676720-100723097	+	chr12:100676720	12	3	1	0.083333	0.00333959
chr12:102437882-102439897	-	chr12:102439897	9	1	7	0.777778	0.0233771
chr12:102433645-102439897	-	chr12:102439897	9	2	2	0.222222	0.00667917
chr12:104200099-104208899	-	chr12:104208899	7	1	4	0.571429	0.0133583
chr12:104190671-104208899	-	chr12:104208899	7	2	2	0.285714	0.00667917
chr12:104200632-104208899	-	chr12:104208899	7	3	1	0.142857	0.00333959
chr12:104682708-104683320	+	chr12:104682708	18	1	13	0.722222	0.0434146
chr12:104682708-104707095	+	chr12:104682708	18	2	3	0.166667	0.0100188
chr12:104682708-104733051	+	chr12:104682708	18	3	2	0.111111	0.00667917
chr12:104705067-104721449	+	chr12:104705067	31	1	14	0.451613	0.0467542
chr12:104705067-104733051	+	chr12:104705067	31	2	14	0.451613	0.0467542
chr12:104705067-104725419	+	chr12:104705067	31	3	3	0.096774	0.0100188
chr12:104719114-104721449	+	chr12:104719114	21	1	13	0.619048	0.0434146
chr12:104719114-104733051	+	chr12:104719114	21	2	8	0.380952	0.0267167
chr12:105610846-105623001	-	chr12:105623001	19	1	15	0.789474	0.0500938
chr12:105582050-105623001	-	chr12:105623001	19	2	4	0.210526	0.0133583
chr12:107914263-107937916	+	chr12:107914263	23	1	19	0.826087	0.0634521
chr12:107914263-107914413	+	chr12:107914263	23	2	2	0.086957	0.00667917
chr12:107914263-108013941	+	chr12:107914263	23	3	2	0.086957	0.00667917
chr12:108138319-108140201	-	chr12:108140201	36	1	22	0.611111	0.0734709
chr12:108133159-108140201	-	chr12:108140201	36	2	10	0.277778	0.0333959
chr12:108136973-108140201	-	chr12:108140201	36	3	4	0.111111	0.0133583
chr12:108140051-108147886	-	chr12:108147886	2	1	1	0.5	0.00333959
chr12:108145191-108147886	-	chr12:108147886	2	2	1	0.5	0.00333959
chr12:10865809-10868382	-	chr12:10868382	4	1	3	0.75	0.0100188
chr12:10856649-10868382	-	chr12:10868382	4	2	1	0.25	0.00333959
chr12:109072047-109095099	-	chr12:109095099	40	1	26	0.65	0.0868292
chr12:109046047-109095099	-	chr12:109095099	40	2	8	0.2	0.0267167
chr12:109094899-109095099	-	chr12:109095099	40	3	6	0.15	0.0200375
chr12:109609609-109612035	+	chr12:109609609	8	1	4	0.5	0.0133583
chr12:109609609-109639506	+	chr12:109609609	8	2	2	0.25	0.00667917
chr12:109609609-109671652	+	chr12:109609609	8	3	2	0.25	0.00667917
chr12:109660311-109661709	+	chr12:109660311	16	1	11	0.6875	0.0367354
chr12:109660311-109665294	+	chr12:109660311	16	2	5	0.3125	0.0166979
chr12:109919441-109928932	+	chr12:109919441	3	1	2	0.666667	0.00667917
chr12:109919441-109964221	+	chr12:109919441	3	2	1	0.333333	0.00333959
chr1:21076215-21100103	-	chr1:21100103	7	1	4	0.571429	0.0133583
chr1:21097422-21100103	-	chr1:21100103	7	2	2	0.285714	0.00667917
chr1:21074036-21100103	-	chr1:21100103	7	3	1	0.142857	0.00333959
chr12:110426767-110429565	-	chr12:110429565	8	1	7	0.875	0.0233771
chr12:110418756-110429565	-	chr12:110429565	8	2	1	0.125	0.00333959
chr1:21071236-21107033	-	chr1:21107033	12	1	6	0.5	0.0200375
chr1:21083658-21107033	-	chr1:21107033	12	2	4	0.333333	0.0133583
chr1:21091869-21107033	-	chr1:21107033	12	3	2	0.166667	0.00667917
chr12:110729824-110734542	+	chr12:110729824	2	1	1	0.5	0.00333959
chr12:110729824-110760877	+	chr12:110729824	2	2	1	0.5	0.00333959
chr12:110819556-110834257	-	chr12:110834257	69	1	60	0.869565	0.200375
chr12:110820647-110834257	-	chr12:110834257	69	2	6	0.086957	0.0200375
chr12:110832905-110834257	-	chr12:110834257	69	3	3	0.043478	0.0100188
chr12:111064166-111070364	+	chr12:111064166	6	1	4	0.666667	0.0133583
chr12:111064166-111072584	+	chr12:111064166	6	2	2	0.333333	0.00667917
chr12:111923074-111924628	-	chr12:111924628	72	1	41	0.569444	0.136923
chr12:111923068-111924628	-	chr12:111924628	72	2	19	0.263889	0.0634521
chr12:111907911-111924628	-	chr12:111924628	72	3	8	0.111111	0.0267167
chr12:111920590-111924628	-	chr12:111924628	72	4	4	0.055556	0.0133583
chr12:111951160-111957880	-	chr12:111957880	12	1	11	0.916667	0.0367354
chr12:111923074-111957880	-	chr12:111957880	12	2	1	0.083333	0.00333959
chr12:111990083-111990781	-	chr12:111990781	8	1	5	0.625	0.0166979
chr12:111962995-111990781	-	chr12:111990781	8	2	3	0.375	0.0100188
chr12:111991961-111993723	-	chr12:111993723	109	1	58	0.53211	0.193696
chr12:111990083-111993723	-	chr12:111993723	109	2	30	0.275229	0.100188
chr12:111951160-111993723	-	chr12:111993723	109	3	16	0.146789	0.0534334
chr12:111962995-111993723	-	chr12:111993723	109	4	3	0.027523	0.0100188
chr12:111923068-111993723	-	chr12:111993723	109	5	2	0.018349	0.00667917
chr12:11126253-11199787	-	chr12:11199787	24	1	9	0.375	0.0300563
chr12:11180999-11199787	-	chr12:11199787	24	2	9	0.375	0.0300563
chr12:11199618-11199787	-	chr12:11199787	24	3	5	0.208333	0.0166979
chr12:11187380-11199787	-	chr12:11199787	24	4	1	0.041667	0.00333959
chr12:112130500-112130700	+	chr12:112130500	17	1	6	0.352941	0.0200375
chr12:112130500-112147488	+	chr12:112130500	17	2	4	0.235294	0.0133583
chr12:112130500-112159543	+	chr12:112130500	17	3	4	0.235294	0.0133583
chr12:112130500-112171872	+	chr12:112130500	17	4	3	0.176471	0.0100188
chr12:112153624-112165947	+	chr12:112153624	7	1	4	0.571429	0.0133583
chr12:112153624-112171872	+	chr12:112153624	7	2	3	0.428571	0.0100188
chr12:112219721-112221102	+	chr12:112219721	7	1	6	0.857143	0.0200375
chr12:112219721-112223150	+	chr12:112219721	7	2	1	0.142857	0.00333959
chr12:112371689-112381173	-	chr12:112381173	35	1	20	0.571429	0.0667917
chr12:112370389-112381173	-	chr12:112381173	35	2	13	0.371429	0.0434146
chr12:112374963-112381173	-	chr12:112381173	35	3	2	0.057143	0.00667917
chr12:112654095-112657293	-	chr12:112657293	9	1	8	0.888889	0.0267167
chr12:112647818-112657293	-	chr12:112657293	9	2	1	0.111111	0.00333959
chr12:112647818-112666615	-	chr12:112666615	4	1	2	0.5	0.00667917
chr12:112657189-112666615	-	chr12:112666615	4	2	1	0.25	0.00333959
chr12:112664446-112666615	-	chr12:112666615	4	3	1	0.25	0.00333959
chr12:112704715-112717190	-	chr12:112717190	3	1	2	0.666667	0.00667917
chr12:112711458-112717190	-	chr12:112717190	3	2	1	0.333333	0.00333959
chr12:112743867-112757546	-	chr12:112757546	21	1	9	0.428571	0.0300563
chr12:112757028-112757546	-	chr12:112757546	21	2	9	0.428571	0.0300563
chr12:112752260-112757546	-	chr12:112757546	21	3	3	0.142857	0.0100188
chr12:113614644-113618863	-	chr12:113618863	6	1	4	0.666667	0.0133583
chr12:113616781-113618863	-	chr12:113618863	6	2	1	0.166667	0.00333959
chr12:113618733-113618863	-	chr12:113618863	6	3	1	0.166667	0.00333959
chr12:113705647-113707650	+	chr12:113705647	157	1	156	0.993631	0.520975
chr12:113705647-113706677	+	chr12:113705647	157	2	1	0.006369	0.00333959
chr12:113711036-113711473	+	chr12:113711036	7	1	6	0.857143	0.0200375
chr12:113711036-113714840	+	chr12:113711036	7	2	1	0.142857	0.00333959
chr12:116668337-116675510	-	chr12:116675510	171	1	99	0.578947	0.330619
chr12:116674625-116675510	-	chr12:116675510	171	2	35	0.204678	0.116885
chr12:116675272-116675510	-	chr12:116675510	171	3	32	0.187135	0.106867
chr12:116534473-116675510	-	chr12:116675510	171	4	5	0.02924	0.0166979
chr12:117187645-117191865	+	chr12:117187645	4	1	3	0.75	0.0100188
chr12:117187645-117217153	+	chr12:117187645	4	2	1	0.25	0.00333959
chr12:117365827-117402659	+	chr12:117365827	38	1	19	0.5	0.0634521
chr12:117365827-117387511	+	chr12:117365827	38	2	13	0.342105	0.0434146
chr12:117365827-117426674	+	chr12:117365827	38	3	6	0.157895	0.0200375
chr12:117383168-117387511	+	chr12:117383168	14	1	11	0.785714	0.0367354
chr12:117383168-117402659	+	chr12:117383168	14	2	3	0.214286	0.0100188
chr12:117402501-117402659	+	chr12:117402501	27	1	18	0.666667	0.0601125
chr12:117402501-117426674	+	chr12:117402501	27	2	9	0.333333	0.0300563
chr12:118456876-118458790	+	chr12:118456876	12	1	5	0.416667	0.0166979
chr12:118456876-118465835	+	chr12:118456876	12	2	5	0.416667	0.0166979
chr12:118456876-118467630	+	chr12:118456876	12	3	2	0.166667	0.00667917
chr12:118472790-118481182	-	chr12:118481182	2	1	1	0.5	0.00333959
chr12:118480645-118481182	-	chr12:118481182	2	2	1	0.5	0.00333959
chr12:118517150-118533619	-	chr12:118533619	10	1	7	0.7	0.0233771
chr12:118511503-118533619	-	chr12:118533619	10	2	3	0.3	0.0100188
chr12:120260623-120272032	-	chr12:120272032	5	1	4	0.8	0.0133583
chr12:120241009-120272032	-	chr12:120272032	5	2	1	0.2	0.00333959
chr12:120616427-120616753	-	chr12:120616753	8	1	7	0.875	0.0233771
chr12:120615249-120616753	-	chr12:120616753	8	2	1	0.125	0.00333959
chr12:120992520-121001746	+	chr12:120992520	15	1	8	0.533333	0.0267167
chr12:120992520-121009094	+	chr12:120992520	15	2	3	0.2	0.0100188
chr12:120992520-121004783	+	chr12:120992520	15	3	2	0.133333	0.00667917
chr12:120992520-121003332	+	chr12:120992520	15	4	1	0.066667	0.00333959
chr12:120992520-121013491	+	chr12:120992520	15	5	1	0.066667	0.00333959
chr12:120995084-120995485	+	chr12:120995084	51	1	45	0.882353	0.150281
chr12:120995084-120998689	+	chr12:120995084	51	2	6	0.117647	0.0200375
chr12:121220457-121222396	-	chr12:121222396	323	1	319	0.987616	1.06533
chr12:121204065-121222396	-	chr12:121222396	323	2	4	0.012384	0.0133583
chr12:121659715-121660846	+	chr12:121659715	6	1	4	0.666667	0.0133583
chr12:121659715-121661237	+	chr12:121659715	6	2	2	0.333333	0.00667917
chr12:121701608-121708748	-	chr12:121708748	5	1	3	0.6	0.0100188
chr12:121706440-121708748	-	chr12:121708748	5	2	2	0.4	0.00667917
chr12:121853961-121855714	+	chr12:121853961	12	1	11	0.916667	0.0367354
chr12:121853961-121861320	+	chr12:121853961	12	2	1	0.083333	0.00333959
chr1:212139771-212194554	-	chr1:212194554	6	1	3	0.5	0.0100188
chr1:212193463-212194554	-	chr1:212194554	6	2	3	0.5	0.0100188
chr12:122181534-122199644	+	chr12:122181534	73	1	42	0.575342	0.140263
chr12:122181534-122190129	+	chr12:122181534	73	2	21	0.287671	0.0701313
chr12:122181534-122188345	+	chr12:122181534	73	3	9	0.123288	0.0300563
chr12:122181534-122211419	+	chr12:122181534	73	4	1	0.013699	0.00333959
chr12:122186231-122190129	+	chr12:122186231	21	1	11	0.52381	0.0367354
chr12:122186231-122199644	+	chr12:122186231	21	2	8	0.380952	0.0267167
chr12:122186231-122211419	+	chr12:122186231	21	3	2	0.095238	0.00667917
chr1:21220009-21221994	-	chr1:21221994	23	1	22	0.956522	0.0734709
chr1:21219111-21221994	-	chr1:21221994	23	2	1	0.043478	0.00333959
chr12:122380439-122380881	+	chr12:122380439	60	1	43	0.716667	0.143602
chr12:122380439-122386967	+	chr12:122380439	60	2	17	0.283333	0.056773
chr12:122861935-122865105	-	chr12:122865105	5	1	3	0.6	0.0100188
chr12:122837272-122865105	-	chr12:122865105	5	2	2	0.4	0.00667917
chr12:12283716-12303972	-	chr12:12303972	11	1	3	0.272727	0.0100188
chr12:12291258-12303972	-	chr12:12303972	11	2	3	0.272727	0.0100188
chr12:12301875-12303972	-	chr12:12303972	11	3	3	0.272727	0.0100188
chr12:12300299-12303972	-	chr12:12303972	11	4	2	0.181818	0.00667917
chr12:123052807-123061576	+	chr12:123052807	8	1	7	0.875	0.0233771
chr12:123052807-123076000	+	chr12:123052807	8	2	1	0.125	0.00333959
chr12:123068824-123069537	+	chr12:123068824	19	1	9	0.473684	0.0300563
chr12:123068824-123087790	+	chr12:123068824	19	2	4	0.210526	0.0133583
chr12:123068824-123070321	+	chr12:123068824	19	3	3	0.157895	0.0100188
chr12:123068824-123103092	+	chr12:123068824	19	4	3	0.157895	0.0100188
chr12:123102889-123103092	+	chr12:123102889	3	1	2	0.666667	0.00667917
chr12:123102889-123109235	+	chr12:123102889	3	2	1	0.333333	0.00333959
chr12:12332743-12340053	-	chr12:12340053	19	1	10	0.526316	0.0333959
chr12:12336913-12340053	-	chr12:12340053	19	2	5	0.263158	0.0166979
chr12:12274019-12340053	-	chr12:12340053	19	3	3	0.157895	0.0100188
chr12:12273303-12340053	-	chr12:12340053	19	4	1	0.052632	0.00333959
chr12:12332743-12356334	-	chr12:12356334	6	1	4	0.666667	0.0133583
chr12:12339856-12356334	-	chr12:12356334	6	2	2	0.333333	0.00667917
chr12:123983090-123984083	-	chr12:123984083	9	1	6	0.666667	0.0200375
chr12:123968726-123984083	-	chr12:123984083	9	2	3	0.333333	0.0100188
chr12:124101057-124102419	+	chr12:124101057	13	1	10	0.769231	0.0333959
chr12:124101057-124103384	+	chr12:124101057	13	2	3	0.230769	0.0100188
chr12:124904502-124934413	-	chr12:124934413	7	1	4	0.571429	0.0133583
chr12:124922475-124934413	-	chr12:124934413	7	2	3	0.428571	0.0100188
chr12:124934360-124941708	-	chr12:124941708	7	1	5	0.714286	0.0166979
chr12:124911167-124941708	-	chr12:124941708	7	2	2	0.285714	0.00667917
chr12:125292306-125294835	-	chr12:125294835	12	1	11	0.916667	0.0367354
chr12:125284669-125294835	-	chr12:125294835	12	2	1	0.083333	0.00333959
chr12:125292306-125302253	-	chr12:125302253	32	1	22	0.6875	0.0734709
chr12:125296415-125302253	-	chr12:125302253	32	2	8	0.25	0.0267167
chr12:125298747-125302253	-	chr12:125302253	32	3	2	0.0625	0.00667917
chr12:125587224-125591814	+	chr12:125587224	10	1	4	0.4	0.0133583
chr12:125587224-125599103	+	chr12:125587224	10	2	3	0.3	0.0100188
chr12:125587224-125603311	+	chr12:125587224	10	3	3	0.3	0.0100188
chr12:129299319-129299615	-	chr12:129299615	45	1	26	0.577778	0.0868292
chr12:129293332-129299615	-	chr12:129299615	45	2	19	0.422222	0.0634521
chr1:213037066-213058738	+	chr1:213037066	28	1	13	0.464286	0.0434146
chr1:213037066-213046160	+	chr1:213037066	28	2	8	0.285714	0.0267167
chr1:213037066-213062599	+	chr1:213037066	28	3	4	0.142857	0.0133583
chr1:213037066-213037861	+	chr1:213037066	28	4	3	0.107143	0.0100188
chr1:21295966-21307720	-	chr1:21307720	83	1	65	0.783133	0.217073
chr1:21306826-21307720	-	chr1:21307720	83	2	18	0.216867	0.0601125
chr12:131285697-131293249	-	chr12:131293249	2	1	1	0.5	0.00333959
chr12:131291526-131293249	-	chr12:131293249	2	2	1	0.5	0.00333959
chr1:213290658-213303232	+	chr1:213290658	5	1	4	0.8	0.0133583
chr1:213290658-213341316	+	chr1:213290658	5	2	1	0.2	0.00333959
chr1:21327691-21329301	-	chr1:21329301	62	1	34	0.548387	0.113546
chr1:21295966-21329301	-	chr1:21329301	62	2	15	0.241935	0.0500938
chr1:21324093-21329301	-	chr1:21329301	62	3	6	0.096774	0.0200375
chr1:21226189-21329301	-	chr1:21329301	62	4	4	0.064516	0.0133583
chr1:21307540-21329301	-	chr1:21329301	62	5	3	0.048387	0.0100188
chr1:213302869-213349835	+	chr1:213302869	6	1	5	0.833333	0.0166979
chr1:213302869-213341316	+	chr1:213302869	6	2	1	0.166667	0.00333959
chr12:133148873-133151150	+	chr12:133148873	4	1	3	0.75	0.0100188
chr12:133148873-133158852	+	chr12:133148873	4	2	1	0.25	0.00333959
chr12:133291443-133294706	+	chr12:133291443	6	1	4	0.666667	0.0133583
chr12:133291443-133291622	+	chr12:133291443	6	2	2	0.333333	0.00667917
chr12:133372437-133390005	-	chr12:133390005	10	1	5	0.5	0.0166979
chr12:133374925-133390005	-	chr12:133390005	10	2	5	0.5	0.0166979
chr12:133383762-133398897	-	chr12:133398897	38	1	21	0.552632	0.0701313
chr12:133381301-133398897	-	chr12:133398897	38	2	10	0.263158	0.0333959
chr12:133357383-133398897	-	chr12:133398897	38	3	5	0.131579	0.0166979
chr12:133351726-133398897	-	chr12:133398897	38	4	2	0.052632	0.00667917
chr1:21329205-21377487	-	chr1:21377487	16	1	7	0.4375	0.0233771
chr1:21327691-21377487	-	chr1:21377487	16	2	4	0.25	0.0133583
chr1:21220009-21377487	-	chr1:21377487	16	3	3	0.1875	0.0100188
chr1:21276495-21377487	-	chr1:21377487	16	4	1	0.0625	0.00333959
chr1:21377358-21377487	-	chr1:21377487	16	5	1	0.0625	0.00333959
chr12:1399017-1553916	+	chr12:1399017	11	1	6	0.545455	0.0200375
chr12:1399017-1481143	+	chr12:1399017	11	2	5	0.454545	0.0166979
chr1:21377358-21415706	-	chr1:21415706	75	1	63	0.84	0.210394
chr1:21329205-21415706	-	chr1:21415706	75	2	12	0.16	0.040075
chr1:21415630-21437876	-	chr1:21437876	201	1	153	0.761194	0.510957
chr1:21377358-21437876	-	chr1:21437876	201	2	36	0.179104	0.120225
chr1:21329205-21437876	-	chr1:21437876	201	3	12	0.059701	0.040075
chr12:1480998-1553916	+	chr12:1480998	10	1	7	0.7	0.0233771
chr12:1480998-1517413	+	chr12:1480998	10	2	3	0.3	0.0100188
chr1:21553651-21554534	-	chr1:21554534	17	1	13	0.764706	0.0434146
chr1:21548239-21554534	-	chr1:21554534	17	2	4	0.235294	0.0133583
chr12:19406873-19427917	+	chr12:19406873	3	1	2	0.666667	0.00667917
chr12:19406873-19413955	+	chr12:19406873	3	2	1	0.333333	0.00333959
chr12:19615443-19626289	+	chr12:19615443	51	1	45	0.882353	0.150281
chr12:19615443-19653155	+	chr12:19615443	51	2	4	0.078431	0.0133583
chr12:19615443-19615651	+	chr12:19615443	51	3	2	0.039216	0.00667917
chr1:220154719-220180680	-	chr1:220180680	10	1	7	0.7	0.0233771
chr1:220179447-220180680	-	chr1:220180680	10	2	3	0.3	0.0100188
chr1:220276788-220311385	+	chr1:220276788	5	1	4	0.8	0.0133583
chr1:220276788-220287816	+	chr1:220276788	5	2	1	0.2	0.00333959
chr1:22074630-22079612	-	chr1:22079612	4	1	3	0.75	0.0100188
chr1:22073559-22079612	-	chr1:22079612	4	2	1	0.25	0.00333959
chr12:21013950-21054401	+	chr12:21013950	3	1	2	0.666667	0.00667917
chr12:21013950-21229503	+	chr12:21013950	3	2	1	0.333333	0.00333959
chr12:21196267-21207570	+	chr12:21196267	19	1	10	0.526316	0.0333959
chr12:21196267-21229503	+	chr12:21196267	19	2	9	0.473684	0.0300563
chr12:22646156-22659753	-	chr12:22659753	51	1	19	0.372549	0.0634521
chr12:22637630-22659753	-	chr12:22659753	51	2	15	0.294118	0.0500938
chr12:22643056-22659753	-	chr12:22659753	51	3	10	0.196078	0.0333959
chr12:22659644-22659753	-	chr12:22659753	51	4	4	0.078431	0.0133583
chr12:22635490-22659753	-	chr12:22659753	51	5	2	0.039216	0.00667917
chr12:22622642-22659753	-	chr12:22659753	51	6	1	0.019608	0.00333959
chr1:223946971-223959941	+	chr1:223946971	26	1	16	0.615385	0.0534334
chr1:223946971-223949953	+	chr1:223946971	26	2	10	0.384615	0.0333959
chr1:22404921-22413359	+	chr1:22404921	4	1	3	0.75	0.0100188
chr1:22404921-22417994	+	chr1:22404921	4	2	1	0.25	0.00333959
chr1:224455735-224491559	-	chr1:224491559	3	1	2	0.666667	0.00667917
chr1:224424207-224491559	-	chr1:224491559	3	2	1	0.333333	0.00333959
chr1:225742607-225755116	-	chr1:225755116	26	1	22	0.846154	0.0734709
chr1:225718255-225755116	-	chr1:225755116	26	2	3	0.115385	0.0100188
chr1:225706899-225755116	-	chr1:225755116	26	3	1	0.038462	0.00333959
chr12:27132716-27143560	-	chr12:27143560	9	1	5	0.555556	0.0166979
chr12:27135705-27143560	-	chr12:27143560	9	2	4	0.444444	0.0133583
chr12:27149674-27152609	-	chr12:27152609	35	1	16	0.457143	0.0534334
chr12:27143382-27152609	-	chr12:27152609	35	2	12	0.342857	0.040075
chr12:27135705-27152609	-	chr12:27152609	35	3	4	0.114286	0.0133583
chr12:27132716-27152609	-	chr12:27152609	35	4	3	0.085714	0.0100188
chr12:27148169-27156323	-	chr12:27156323	19	1	14	0.736842	0.0467542
chr12:27143382-27156323	-	chr12:27156323	19	2	5	0.263158	0.0166979
chr1:227216357-227223308	-	chr1:227223308	8	1	6	0.75	0.0200375
chr1:227203780-227223308	-	chr1:227223308	8	2	2	0.25	0.00667917
chr12:27521194-27556474	+	chr12:27521194	26	1	8	0.307692	0.0267167
chr12:27521194-27533337	+	chr12:27521194	26	2	7	0.269231	0.0233771
chr12:27521194-27530497	+	chr12:27521194	26	3	4	0.153846	0.0133583
chr12:27521194-27571129	+	chr12:27521194	26	4	4	0.153846	0.0133583
chr12:27521194-27568880	+	chr12:27521194	26	5	2	0.076923	0.00667917
chr12:27521194-27523163	+	chr12:27521194	26	6	1	0.038462	0.00333959
chr12:27867712-27877119	+	chr12:27867712	19	1	12	0.631579	0.040075
chr12:27867712-27878600	+	chr12:27867712	19	2	4	0.210526	0.0133583
chr12:27867712-27888489	+	chr12:27867712	19	3	3	0.157895	0.0100188
chr12:28458581-28544344	+	chr12:28458581	80	1	40	0.5	0.133583
chr12:28458581-28460682	+	chr12:28458581	80	2	36	0.45	0.120225
chr12:28458581-28515448	+	chr12:28458581	80	3	3	0.0375	0.0100188
chr12:28458581-28565871	+	chr12:28458581	80	4	1	0.0125	0.00333959
chr1:229602380-229623360	-	chr1:229623360	9	1	6	0.666667	0.0200375
chr1:229622117-229623360	-	chr1:229623360	9	2	2	0.222222	0.00667917
chr1:229611384-229623360	-	chr1:229623360	9	3	1	0.111111	0.00333959
chr1:229622117-229634053	-	chr1:229634053	14	1	8	0.571429	0.0267167
chr1:229625701-229634053	-	chr1:229634053	14	2	4	0.285714	0.0133583
chr1:229602380-229634053	-	chr1:229634053	14	3	1	0.071429	0.00333959
chr1:229631241-229634053	-	chr1:229634053	14	4	1	0.071429	0.00333959
chr1:229657338-229683448	-	chr1:229683448	2	1	1	0.5	0.00333959
chr1:229665945-229683448	-	chr1:229683448	2	2	1	0.5	0.00333959
chr1:229675202-229685181	-	chr1:229685181	6	1	4	0.666667	0.0133583
chr1:229657338-229685181	-	chr1:229685181	6	2	2	0.333333	0.00667917
chr1:230798886-230810870	+	chr1:230798886	9	1	5	0.555556	0.0166979
chr1:230798886-230800333	+	chr1:230798886	9	2	4	0.444444	0.0133583
chr12:30826923-30837391	-	chr12:30837391	5	1	2	0.4	0.00667917
chr12:30829431-30837391	-	chr12:30837391	5	2	2	0.4	0.00667917
chr12:30818153-30837391	-	chr12:30837391	5	3	1	0.2	0.00333959
chr1:231090078-231097049	-	chr1:231097049	128	1	114	0.890625	0.380713
chr1:231079551-231097049	-	chr1:231097049	128	2	7	0.054688	0.0233771
chr1:231081134-231097049	-	chr1:231097049	128	3	7	0.054688	0.0233771
chr12:31586088-31595859	-	chr12:31595859	16	1	12	0.75	0.040075
chr12:31576530-31595859	-	chr12:31595859	16	2	2	0.125	0.00667917
chr12:31542257-31595859	-	chr12:31595859	16	3	1	0.0625	0.00333959
chr12:31555431-31595859	-	chr12:31595859	16	4	1	0.0625	0.00333959
chr12:31595708-31600703	-	chr12:31600703	28	1	12	0.428571	0.040075
chr12:31586088-31600703	-	chr12:31600703	28	2	9	0.321429	0.0300563
chr12:31566369-31600703	-	chr12:31600703	28	3	6	0.214286	0.0200375
chr12:31555431-31600703	-	chr12:31600703	28	4	1	0.035714	0.00333959
chr12:31604873-31613315	-	chr12:31613315	14	1	8	0.571429	0.0267167
chr12:31600471-31613315	-	chr12:31613315	14	2	4	0.285714	0.0133583
chr12:31566369-31613315	-	chr12:31613315	14	3	2	0.142857	0.00667917
chr12:31604873-31648853	-	chr12:31648853	15	1	14	0.933333	0.0467542
chr12:31595708-31648853	-	chr12:31648853	15	2	1	0.066667	0.00333959
chr12:31648743-31652605	-	chr12:31652605	26	1	20	0.769231	0.0667917
chr12:31600471-31652605	-	chr12:31652605	26	2	3	0.115385	0.0100188
chr12:31604873-31652605	-	chr12:31652605	26	3	2	0.076923	0.00667917
chr12:31613127-31652605	-	chr12:31652605	26	4	1	0.038462	0.00333959
chr12:32866142-32871697	+	chr12:32866142	7	1	6	0.857143	0.0200375
chr12:32866142-32875567	+	chr12:32866142	7	2	1	0.142857	0.00333959
chr1:233190013-233193036	-	chr1:233193036	15	1	14	0.933333	0.0467542
chr1:233150410-233193036	-	chr1:233193036	15	2	1	0.066667	0.00333959
chr1:233225806-233231609	-	chr1:233231609	269	1	254	0.944238	0.848255
chr1:233190013-233231609	-	chr1:233231609	269	2	15	0.055762	0.0500938
chr1:233270758-233297109	-	chr1:233297109	135	1	103	0.762963	0.343977
chr1:233248544-233297109	-	chr1:233297109	135	2	12	0.088889	0.040075
chr1:233248590-233297109	-	chr1:233297109	135	3	12	0.088889	0.040075
chr1:233225806-233297109	-	chr1:233297109	135	4	8	0.059259	0.0267167
chr1:233270758-233314921	-	chr1:233314921	16	1	15	0.9375	0.0500938
chr1:233248544-233314921	-	chr1:233314921	16	2	1	0.0625	0.00333959
chr1:233296028-233336010	-	chr1:233336010	5	1	3	0.6	0.0100188
chr1:233334684-233336010	-	chr1:233336010	5	2	2	0.4	0.00667917
chr1:233334684-233344435	-	chr1:233344435	103	1	49	0.475728	0.16364
chr1:233313547-233344435	-	chr1:233344435	103	2	34	0.330097	0.113546
chr1:233296028-233344435	-	chr1:233344435	103	3	15	0.145631	0.0500938
chr1:233270758-233344435	-	chr1:233344435	103	4	5	0.048544	0.0166979
chr1:233334684-233353930	-	chr1:233353930	9	1	6	0.666667	0.0200375
chr1:233313547-233353930	-	chr1:233353930	9	2	2	0.222222	0.00667917
chr1:233344263-233353930	-	chr1:233353930	9	3	1	0.111111	0.00333959
chr1:233353644-233363117	-	chr1:233363117	50	1	47	0.94	0.156961
chr1:233190013-233363117	-	chr1:233363117	50	2	3	0.06	0.0100188
chr1:233334684-233372726	-	chr1:233372726	167	1	47	0.281437	0.156961
chr1:233372001-233372726	-	chr1:233372726	167	2	37	0.221557	0.123565
chr1:233353644-233372726	-	chr1:233372726	167	3	30	0.179641	0.100188
chr1:233362971-233372726	-	chr1:233372726	167	4	16	0.095808	0.0534334
chr1:233344263-233372726	-	chr1:233372726	167	5	15	0.08982	0.0500938
chr1:233270758-233372726	-	chr1:233372726	167	6	9	0.053892	0.0300563
chr1:233313547-233372726	-	chr1:233372726	167	7	8	0.047904	0.0267167
chr1:233296028-233372726	-	chr1:233372726	167	8	4	0.023952	0.0133583
chr1:233248544-233372726	-	chr1:233372726	167	9	1	0.005988	0.00333959
chr1:233334684-233388534	-	chr1:233388534	24	1	13	0.541667	0.0434146
chr1:233372590-233388534	-	chr1:233388534	24	2	8	0.333333	0.0267167
chr1:233362971-233388534	-	chr1:233388534	24	3	3	0.125	0.0100188
chr1:233334684-233395090	-	chr1:233395090	5	1	4	0.8	0.0133583
chr1:233296028-233395090	-	chr1:233395090	5	2	1	0.2	0.00333959
chr1:233482187-233498039	+	chr1:233482187	12	1	4	0.333333	0.0133583
chr1:233482187-233515456	+	chr1:233482187	12	2	4	0.333333	0.0133583
chr1:233482187-233512273	+	chr1:233482187	12	3	3	0.25	0.0100188
chr1:233482187-233490757	+	chr1:233482187	12	4	1	0.083333	0.00333959
chr1:23356961-23385660	+	chr1:23356961	26	1	15	0.576923	0.0500938
chr1:23356961-23377013	+	chr1:23356961	26	2	11	0.423077	0.0367354
chr1:23370919-23377013	+	chr1:23370919	5	1	4	0.8	0.0133583
chr1:23370919-23385660	+	chr1:23370919	5	2	1	0.2	0.00333959
chr1:234593412-234608557	-	chr1:234608557	7	1	4	0.571429	0.0133583
chr1:234586173-234608557	-	chr1:234608557	7	2	3	0.428571	0.0100188
chr1:235582787-235597595	+	chr1:235582787	11	1	7	0.636364	0.0233771
chr1:235582787-235590554	+	chr1:235582787	11	2	4	0.363636	0.0133583
chr1:235616401-235618996	-	chr1:235618996	4	1	3	0.75	0.0100188
chr1:235617467-235618996	-	chr1:235618996	4	2	1	0.25	0.00333959
chr1:235643369-235658138	-	chr1:235658138	49	1	40	0.816327	0.133583
chr1:235634163-235658138	-	chr1:235658138	49	2	9	0.183673	0.0300563
chr1:236192849-236201553	-	chr1:236201553	6	1	4	0.666667	0.0133583
chr1:236187369-236201553	-	chr1:236201553	6	2	2	0.333333	0.00667917
chr1:24143164-24147083	-	chr1:24147083	11	1	7	0.636364	0.0233771
chr1:24140679-24147083	-	chr1:24147083	11	2	4	0.363636	0.0133583
chr12:42748962-42792796	+	chr12:42748962	3	1	2	0.666667	0.00667917
chr12:42748962-42781337	+	chr12:42748962	3	2	1	0.333333	0.00333959
chr12:42768664-42768876	+	chr12:42768664	8	1	4	0.5	0.0133583
chr12:42768664-42792796	+	chr12:42768664	8	2	4	0.5	0.0133583
chr1:243708811-243736350	-	chr1:243736350	20	1	19	0.95	0.0634521
chr1:243675625-243736350	-	chr1:243736350	20	2	1	0.05	0.00333959
chr1:243776972-243828185	-	chr1:243828185	4	1	3	0.75	0.0100188
chr1:243708811-243828185	-	chr1:243828185	4	2	1	0.25	0.00333959
chr1:243776972-243859018	-	chr1:243859018	7	1	3	0.428571	0.0100188
chr1:243727021-243859018	-	chr1:243859018	7	2	2	0.285714	0.00667917
chr1:243800912-243859018	-	chr1:243859018	7	3	2	0.285714	0.00667917
chr1:243736227-244006584	-	chr1:244006584	25	1	7	0.28	0.0233771
chr1:243776972-244006584	-	chr1:244006584	25	2	7	0.28	0.0233771
chr1:243708811-244006584	-	chr1:244006584	25	3	5	0.2	0.0166979
chr1:243716030-244006584	-	chr1:244006584	25	4	4	0.16	0.0133583
chr1:243800912-244006584	-	chr1:244006584	25	5	2	0.08	0.00667917
chr12:45814853-45816845	+	chr12:45814853	17	1	10	0.588235	0.0333959
chr12:45814853-45815056	+	chr12:45814853	17	2	7	0.411765	0.0233771
chr1:246078831-246093239	-	chr1:246093239	115	1	60	0.521739	0.200375
chr1:246091232-246093239	-	chr1:246093239	115	2	29	0.252174	0.096848
chr1:246021797-246093239	-	chr1:246093239	115	3	24	0.208696	0.08015
chr1:245927342-246093239	-	chr1:246093239	115	4	2	0.017391	0.00667917
chr12:46230371-46233279	+	chr12:46230371	12	1	7	0.583333	0.0233771
chr12:46230371-46254732	+	chr12:46230371	12	2	4	0.333333	0.0133583
chr12:46230371-46246679	+	chr12:46230371	12	3	1	0.083333	0.00333959
chr12:46622935-46637097	-	chr12:46637097	37	1	30	0.810811	0.100188
chr12:46633461-46637097	-	chr12:46637097	37	2	7	0.189189	0.0233771
chr12:46622935-46648719	-	chr12:46648719	13	1	9	0.692308	0.0300563
chr12:46633461-46648719	-	chr12:46648719	13	2	4	0.307692	0.0133583
chr12:47497895-47501947	+	chr12:47497895	41	1	40	0.97561	0.133583
chr12:47497895-47610472	+	chr12:47497895	41	2	1	0.02439	0.00333959
chr12:48477373-48491907	-	chr12:48491907	8	1	4	0.5	0.0133583
chr12:48482583-48491907	-	chr12:48491907	8	2	4	0.5	0.0133583
chr12:50385780-50386438	-	chr12:50386438	81	1	74	0.91358	0.247129
chr12:50384466-50386438	-	chr12:50386438	81	2	7	0.08642	0.0233771
chr12:50384466-50388292	-	chr12:50388292	7	1	4	0.571429	0.0133583
chr12:50385780-50388292	-	chr12:50388292	7	2	3	0.428571	0.0100188
chr12:50821544-50822873	+	chr12:50821544	29	1	7	0.241379	0.0233771
chr12:50821544-50824353	+	chr12:50821544	29	2	7	0.241379	0.0233771
chr12:50821544-50829407	+	chr12:50821544	29	3	6	0.206897	0.0200375
chr12:50821544-50855130	+	chr12:50821544	29	4	5	0.172414	0.0166979
chr12:50821544-50835426	+	chr12:50821544	29	5	4	0.137931	0.0133583
chr12:50821547-50822873	+	chr12:50821547	2	1	1	0.5	0.00333959
chr12:50821547-50824353	+	chr12:50821547	2	2	1	0.5	0.00333959
chr12:51064968-51068412	+	chr12:51064968	22	1	13	0.590909	0.0434146
chr12:51064968-51077031	+	chr12:51064968	22	2	8	0.363636	0.0267167
chr12:51064968-51074546	+	chr12:51064968	22	3	1	0.045455	0.00333959
chr12:51402258-51404549	-	chr12:51404549	136	1	125	0.919118	0.417448
chr12:51382164-51404549	-	chr12:51404549	136	2	6	0.044118	0.0200375
chr12:51375421-51404549	-	chr12:51404549	136	3	5	0.036765	0.0166979
chr12:51442816-51450285	+	chr12:51442816	5	1	3	0.6	0.0100188
chr12:51442816-51451911	+	chr12:51442816	5	2	2	0.4	0.00667917
chr12:51497452-51497986	-	chr12:51497986	10	1	8	0.8	0.0267167
chr12:51495717-51497986	-	chr12:51497986	10	2	2	0.2	0.00667917
chr12:520912-527802	+	chr12:520912	3	1	2	0.666667	0.00667917
chr12:520912-547720	+	chr12:520912	3	2	1	0.333333	0.00333959
chr12:52093353-52188425	+	chr12:52093353	3	1	2	0.666667	0.00667917
chr12:52093353-52100499	+	chr12:52093353	3	2	1	0.333333	0.00333959
chr12:52139686-52145377	+	chr12:52139686	5	1	2	0.4	0.00667917
chr12:52139686-52168146	+	chr12:52139686	5	2	2	0.4	0.00667917
chr12:52139686-52164467	+	chr12:52139686	5	3	1	0.2	0.00333959
chr12:52631292-52635420	+	chr12:52631292	38	1	21	0.552632	0.0701313
chr12:52631292-52632559	+	chr12:52631292	38	2	13	0.342105	0.0434146
chr12:52631292-52636921	+	chr12:52631292	38	3	2	0.052632	0.00667917
chr12:52631292-52641995	+	chr12:52631292	38	4	2	0.052632	0.00667917
chr12:53413693-53428493	+	chr12:53413693	4	1	3	0.75	0.0100188
chr12:53413693-53421972	+	chr12:53413693	4	2	1	0.25	0.00333959
chr12:53421565-53421972	+	chr12:53421565	8	1	4	0.5	0.0133583
chr12:53421565-53431406	+	chr12:53421565	8	2	4	0.5	0.0133583
chr12:53848509-53862616	+	chr12:53848509	4	1	3	0.75	0.0100188
chr12:53848509-53865591	+	chr12:53848509	4	2	1	0.25	0.00333959
chr12:53854798-53865591	+	chr12:53854798	6	1	5	0.833333	0.0166979
chr12:53854798-53862616	+	chr12:53854798	6	2	1	0.166667	0.00333959
chr12:54735989-54739299	+	chr12:54735989	5	1	3	0.6	0.0100188
chr12:54735989-54741835	+	chr12:54735989	5	2	2	0.4	0.00667917
chr12:54737008-54739299	+	chr12:54737008	9	1	7	0.777778	0.0233771
chr12:54737008-54741835	+	chr12:54737008	9	2	2	0.222222	0.00667917
chr12:56182858-56197512	-	chr12:56197512	4	1	3	0.75	0.0100188
chr12:56189808-56197512	-	chr12:56197512	4	2	1	0.25	0.00333959
chr12:56956200-56965639	+	chr12:56956200	97	1	92	0.948454	0.307242
chr12:56956200-56982158	+	chr12:56956200	97	2	3	0.030928	0.0100188
chr12:56956200-56975936	+	chr12:56956200	97	3	2	0.020619	0.00667917
chr12:56962758-56965639	+	chr12:56962758	22	1	15	0.681818	0.0500938
chr12:56962758-56980710	+	chr12:56962758	22	2	4	0.181818	0.0133583
chr12:56962758-56982158	+	chr12:56962758	22	3	3	0.136364	0.0100188
chr12:56998000-56999111	-	chr12:56999111	11	1	6	0.545455	0.0200375
chr12:56997142-56999111	-	chr12:56999111	11	2	5	0.454545	0.0166979
chr12:57059987-57066849	-	chr12:57066849	6	1	3	0.5	0.0100188
chr12:57064058-57066849	-	chr12:57066849	6	2	3	0.5	0.0100188
chr12:57132217-57133147	-	chr12:57133147	3	1	2	0.666667	0.00667917
chr12:57127930-57133147	-	chr12:57133147	3	2	1	0.333333	0.00333959
chr12:57674140-57677839	-	chr12:57677839	11	1	6	0.545455	0.0200375
chr12:57677606-57677839	-	chr12:57677839	11	2	5	0.454545	0.0166979
chr12:57674140-57690334	-	chr12:57690334	4	1	3	0.75	0.0100188
chr12:57660513-57690334	-	chr12:57690334	4	2	1	0.25	0.00333959
chr12:57857447-57857874	+	chr12:57857447	15	1	13	0.866667	0.0434146
chr12:57857447-57860172	+	chr12:57857447	15	2	2	0.133333	0.00667917
chr12:57891939-57892406	+	chr12:57891939	44	1	41	0.931818	0.136923
chr12:57891939-57906747	+	chr12:57891939	44	2	3	0.068182	0.0100188
chr1:26127533-26136311	+	chr1:26127533	7	1	4	0.571429	0.0133583
chr1:26127533-26138026	+	chr1:26127533	7	2	3	0.428571	0.0100188
chr12:62864480-62919882	+	chr12:62864480	4	1	2	0.5	0.00667917
chr12:62864480-62892828	+	chr12:62864480	4	2	1	0.25	0.00333959
chr12:62864480-62895478	+	chr12:62864480	4	3	1	0.25	0.00333959
chr12:64011083-64041145	-	chr12:64041145	2	1	1	0.5	0.00333959
chr12:64038182-64041145	-	chr12:64041145	2	2	1	0.5	0.00333959
chr12:6442234-6443410	-	chr12:6443410	6	1	5	0.833333	0.0166979
chr12:6439432-6443410	-	chr12:6443410	6	2	1	0.166667	0.00333959
chr12:64456696-64458999	+	chr12:64456696	52	1	29	0.557692	0.096848
chr12:64456696-64509673	+	chr12:64456696	52	2	10	0.192308	0.0333959
chr12:64456696-64521980	+	chr12:64456696	52	3	8	0.153846	0.0267167
chr12:64456696-64474150	+	chr12:64456696	52	4	5	0.096154	0.0166979
chr1:26581661-26582356	+	chr1:26581661	2	1	1	0.5	0.00333959
chr1:26581661-26586293	+	chr1:26581661	2	2	1	0.5	0.00333959
chr12:6630963-6631203	+	chr12:6630963	6	1	3	0.5	0.0100188
chr12:6630963-6632512	+	chr12:6630963	6	2	3	0.5	0.0100188
chr12:66909398-66935730	-	chr12:66935730	8	1	5	0.625	0.0166979
chr12:66923610-66935730	-	chr12:66935730	8	2	3	0.375	0.0100188
chr12:6787292-6797392	-	chr12:6797392	3	1	2	0.666667	0.00667917
chr12:6778196-6797392	-	chr12:6797392	3	2	1	0.333333	0.00333959
chr12:69214104-69218431	+	chr12:69214104	46	1	39	0.847826	0.130244
chr12:69214104-69222711	+	chr12:69214104	46	2	7	0.152174	0.0233771
chr12:69983264-69987393	+	chr12:69983264	21	1	18	0.857143	0.0601125
chr12:69983264-69985939	+	chr12:69983264	21	2	3	0.142857	0.0100188
chr12:70671911-70704797	+	chr12:70671911	71	1	58	0.816901	0.193696
chr12:70671911-70724249	+	chr12:70671911	71	2	6	0.084507	0.0200375
chr12:70671911-70713144	+	chr12:70671911	71	3	4	0.056338	0.0133583
chr12:70671911-70679366	+	chr12:70671911	71	4	3	0.042254	0.0100188
chr12:70713077-70724249	+	chr12:70713077	5	1	2	0.4	0.00667917
chr12:70713077-70731293	+	chr12:70713077	5	2	2	0.4	0.00667917
chr12:70713077-70736087	+	chr12:70713077	5	3	1	0.2	0.00333959
chr12:70723202-70724249	+	chr12:70723202	19	1	11	0.578947	0.0367354
chr12:70723202-70740104	+	chr12:70723202	19	2	8	0.421053	0.0267167
chr12:74678804-74715474	-	chr12:74715474	28	1	24	0.857143	0.08015
chr12:74700337-74715474	-	chr12:74715474	28	2	4	0.142857	0.0133583
chr12:77191213-77199219	+	chr12:77191213	5	1	4	0.8	0.0133583
chr12:77191213-77216311	+	chr12:77191213	5	2	1	0.2	0.00333959
chr1:27739065-27755443	-	chr1:27755443	7	1	6	0.857143	0.0200375
chr1:27744769-27755443	-	chr1:27755443	7	2	1	0.142857	0.00333959
chr1:28365349-28369161	-	chr1:28369161	18	1	11	0.611111	0.0367354
chr1:28362054-28369161	-	chr1:28369161	18	2	5	0.277778	0.0166979
chr1:28354299-28369161	-	chr1:28369161	18	3	2	0.111111	0.00667917
chr12:89853414-89861462	-	chr12:89861462	2	1	1	0.5	0.00333959
chr12:89860546-89861462	-	chr12:89861462	2	2	1	0.5	0.00333959
chr12:89885712-89891119	-	chr12:89891119	13	1	12	0.923077	0.040075
chr12:89860546-89891119	-	chr12:89891119	13	2	1	0.076923	0.00333959
chr12:90003713-90049884	-	chr12:90049884	6	1	3	0.5	0.0100188
chr12:90049455-90049884	-	chr12:90049884	6	2	3	0.5	0.0100188
chr1:29010094-29037154	+	chr1:29010094	5	1	3	0.6	0.0100188
chr1:29010094-29029081	+	chr1:29010094	5	2	2	0.4	0.00667917
chr12:95488367-95535315	-	chr12:95535315	8	1	3	0.375	0.0100188
chr12:95498782-95535315	-	chr12:95535315	8	2	3	0.375	0.0100188
chr12:95507426-95535315	-	chr12:95535315	8	3	2	0.25	0.00667917
chr12:95602618-95605043	-	chr12:95605043	423	1	415	0.981087	1.38593
chr12:95566375-95605043	-	chr12:95605043	423	2	8	0.018913	0.0267167
chr12:95645715-95660408	+	chr12:95645715	4	1	2	0.5	0.00667917
chr12:95645715-95690034	+	chr12:95645715	4	2	2	0.5	0.00667917
chr12:95660132-95690034	+	chr12:95660132	31	1	15	0.483871	0.0500938
chr12:95660132-95668665	+	chr12:95660132	31	2	9	0.290323	0.0300563
chr12:95660132-95676420	+	chr12:95660132	31	3	5	0.16129	0.0166979
chr12:95660132-95660408	+	chr12:95660132	31	4	1	0.032258	0.00333959
chr12:95660132-95692719	+	chr12:95660132	31	5	1	0.032258	0.00333959
chr12:96076482-96077487	-	chr12:96077487	46	1	40	0.869565	0.133583
chr12:96059585-96077487	-	chr12:96077487	46	2	6	0.130435	0.0200375
chr12:96104218-96131922	-	chr12:96131922	28	1	13	0.464286	0.0434146
chr12:96131643-96131922	-	chr12:96131922	28	2	11	0.392857	0.0367354
chr12:96076482-96131922	-	chr12:96131922	28	3	4	0.142857	0.0133583
chr12:96076482-96181246	-	chr12:96181246	9	1	8	0.888889	0.0267167
chr12:96059585-96181246	-	chr12:96181246	9	2	1	0.111111	0.00333959
chr12:96717725-96728643	-	chr12:96728643	34	1	30	0.882353	0.100188
chr12:96704829-96728643	-	chr12:96728643	34	2	4	0.117647	0.0133583
chr13:100953713-100962162	+	chr13:100953713	72	1	63	0.875	0.210394
chr13:100953713-101020828	+	chr13:100953713	72	2	6	0.083333	0.0200375
chr13:100953713-100992513	+	chr13:100953713	72	3	2	0.027778	0.00667917
chr13:100953713-100982925	+	chr13:100953713	72	4	1	0.013889	0.00333959
chr13:101936283-101944717	-	chr13:101944717	16	1	9	0.5625	0.0300563
chr13:101910793-101944717	-	chr13:101944717	16	2	6	0.375	0.0200375
chr13:101890105-101944717	-	chr13:101944717	16	3	1	0.0625	0.00333959
chr13:103275226-103280274	+	chr13:103275226	6	1	4	0.666667	0.0133583
chr13:103275226-103279516	+	chr13:103275226	6	2	2	0.333333	0.00667917
chr13:111857635-111885640	+	chr13:111857635	9	1	5	0.555556	0.0166979
chr13:111857635-111870227	+	chr13:111857635	9	2	4	0.444444	0.0133583
chr13:113158345-113181798	-	chr13:113181798	13	1	6	0.461538	0.0200375
chr13:113170753-113181798	-	chr13:113181798	13	2	6	0.461538	0.0200375
chr13:113181255-113181798	-	chr13:113181798	13	3	1	0.076923	0.00333959
chr13:113832487-113854830	-	chr13:113854830	5	1	4	0.8	0.0133583
chr13:113849384-113854830	-	chr13:113854830	5	2	1	0.2	0.00333959
chr13:114149816-114175048	+	chr13:114149816	99	1	44	0.444444	0.146942
chr13:114149816-114164739	+	chr13:114149816	99	2	32	0.323232	0.106867
chr13:114149816-114188555	+	chr13:114149816	99	3	15	0.151515	0.0500938
chr13:114149816-114157903	+	chr13:114149816	99	4	8	0.080808	0.0267167
chr13:114164552-114175048	+	chr13:114164552	53	1	43	0.811321	0.143602
chr13:114164552-114193822	+	chr13:114164552	53	2	10	0.188679	0.0333959
chr1:31452908-31454252	-	chr1:31454252	53	1	29	0.54717	0.096848
chr1:31447497-31454252	-	chr1:31454252	53	2	13	0.245283	0.0434146
chr1:31437520-31454252	-	chr1:31454252	53	3	11	0.207547	0.0367354
chr1:31465236-31479949	-	chr1:31479949	10	1	8	0.8	0.0267167
chr1:31478699-31479949	-	chr1:31479949	10	2	2	0.2	0.00667917
chr1:31532050-31532424	-	chr1:31532424	24	1	20	0.833333	0.0667917
chr1:31501642-31532424	-	chr1:31532424	24	2	4	0.166667	0.0133583
chr1:31764759-31766195	-	chr1:31766195	5	1	4	0.8	0.0133583
chr1:31754220-31766195	-	chr1:31766195	5	2	1	0.2	0.00333959
chr13:20534097-20641530	+	chr13:20534097	7	1	4	0.571429	0.0133583
chr13:20534097-20568059	+	chr13:20534097	7	2	3	0.428571	0.0100188
chr13:20632714-20641530	+	chr13:20632714	10	1	8	0.8	0.0267167
chr13:20632714-20633702	+	chr13:20632714	10	2	2	0.2	0.00667917
chr13:20635192-20641530	+	chr13:20635192	13	1	11	0.846154	0.0367354
chr13:20635192-20657916	+	chr13:20635192	13	2	2	0.153846	0.00667917
chr13:21364600-21418025	-	chr13:21418025	6	1	3	0.5	0.0100188
chr13:21395842-21418025	-	chr13:21418025	6	2	3	0.5	0.0100188
chr13:21729831-21742538	-	chr13:21742538	5	1	3	0.6	0.0100188
chr13:21742126-21742538	-	chr13:21742538	5	2	2	0.4	0.00667917
chr13:21987790-21999817	-	chr13:21999817	5	1	3	0.6	0.0100188
chr13:21974511-21999817	-	chr13:21999817	5	2	2	0.4	0.00667917
chr1:32502510-32504220	+	chr1:32502510	14	1	13	0.928571	0.0434146
chr1:32502510-32505174	+	chr1:32502510	14	2	1	0.071429	0.00333959
chr1:32653554-32655850	+	chr1:32653554	13	1	12	0.923077	0.040075
chr1:32653554-32653725	+	chr1:32653554	13	2	1	0.076923	0.00333959
chr1:32694099-32694417	+	chr1:32694099	18	1	11	0.611111	0.0367354
chr1:32694099-32694809	+	chr1:32694099	18	2	7	0.388889	0.0233771
chr13:28748408-28752072	+	chr13:28748408	55	1	54	0.981818	0.180338
chr13:28748408-28813833	+	chr13:28748408	55	2	1	0.018182	0.00333959
chr13:28830428-28835595	+	chr13:28830428	42	1	29	0.690476	0.096848
chr13:28830428-28855516	+	chr13:28830428	42	2	9	0.214286	0.0300563
chr13:28830428-28841538	+	chr13:28830428	42	3	2	0.047619	0.00667917
chr13:28830428-28846208	+	chr13:28830428	42	4	2	0.047619	0.00667917
chr13:28834583-28835595	+	chr13:28834583	26	1	24	0.923077	0.08015
chr13:28834583-28855516	+	chr13:28834583	26	2	2	0.076923	0.00667917
chr1:33097427-33100393	-	chr1:33100393	4	1	3	0.75	0.0100188
chr1:33099245-33100393	-	chr1:33100393	4	2	1	0.25	0.00333959
chr13:33091993-33101669	-	chr13:33101669	90	1	87	0.966667	0.290544
chr13:33054726-33101669	-	chr13:33101669	90	2	3	0.033333	0.0100188
chr13:33306237-33309467	+	chr13:33306237	38	1	33	0.868421	0.110206
chr13:33306237-33320238	+	chr13:33306237	38	2	5	0.131579	0.0166979
chr1:33413822-33415375	-	chr1:33415375	61	1	47	0.770492	0.156961
chr1:33403997-33415375	-	chr1:33415375	61	2	9	0.147541	0.0300563
chr1:33407852-33415375	-	chr1:33415375	61	3	5	0.081967	0.0166979
chr13:35615069-35633000	+	chr13:35615069	9	1	3	0.333333	0.0100188
chr13:35615069-35619538	+	chr13:35615069	9	2	2	0.222222	0.00667917
chr13:35615069-35644989	+	chr13:35615069	9	3	2	0.222222	0.00667917
chr13:35615069-35685115	+	chr13:35615069	9	4	2	0.222222	0.00667917
chr13:37614541-37625720	-	chr13:37625720	13	1	12	0.923077	0.040075
chr13:37621671-37625720	-	chr13:37625720	13	2	1	0.076923	0.00333959
chr13:41826780-41837620	-	chr13:41837620	13	1	8	0.615385	0.0267167
chr13:41808025-41837620	-	chr13:41837620	13	2	5	0.384615	0.0166979
chr13:42385360-42407667	-	chr13:42407667	42	1	18	0.428571	0.0601125
chr13:42335263-42407667	-	chr13:42407667	42	2	16	0.380952	0.0534334
chr13:42149875-42407667	-	chr13:42407667	42	3	4	0.095238	0.0133583
chr13:42404664-42407667	-	chr13:42407667	42	4	4	0.095238	0.0133583
chr1:35846859-35854683	+	chr1:35846859	23	1	10	0.434783	0.0333959
chr1:35846859-35855699	+	chr1:35846859	23	2	9	0.391304	0.0300563
chr1:35846859-35847359	+	chr1:35846859	23	3	2	0.086957	0.00667917
chr1:35846859-35871069	+	chr1:35846859	23	4	2	0.086957	0.00667917
chr1:35936463-35944813	-	chr1:35944813	11	1	6	0.545455	0.0200375
chr1:35940405-35944813	-	chr1:35944813	11	2	5	0.454545	0.0166979
chr13:61013821-61041513	+	chr13:61013821	19	1	11	0.578947	0.0367354
chr13:61013821-61034674	+	chr13:61013821	19	2	4	0.210526	0.0133583
chr13:61013821-61109367	+	chr13:61013821	19	3	3	0.157895	0.0100188
chr13:61013821-61057980	+	chr13:61013821	19	4	1	0.052632	0.00333959
chr13:73347821-73352518	-	chr13:73352518	4	1	2	0.5	0.00667917
chr13:73352324-73352518	-	chr13:73352518	4	2	2	0.5	0.00667917
chr13:75900332-75936743	-	chr13:75936743	22	1	19	0.863636	0.0634521
chr13:75923305-75936743	-	chr13:75936743	22	2	3	0.136364	0.0100188
chr13:76134888-76143643	+	chr13:76134888	14	1	10	0.714286	0.0333959
chr13:76134888-76169126	+	chr13:76134888	14	2	4	0.285714	0.0133583
chr13:77798585-77807398	-	chr13:77807398	5	1	3	0.6	0.0100188
chr13:77791974-77807398	-	chr13:77807398	5	2	2	0.4	0.00667917
chr13:77791974-77818086	-	chr13:77818086	6	1	3	0.5	0.0100188
chr13:77817193-77818086	-	chr13:77818086	6	2	3	0.5	0.0100188
chr1:38297916-38301416	-	chr1:38301416	3	1	2	0.666667	0.00667917
chr1:38300750-38301416	-	chr1:38301416	3	2	1	0.333333	0.00333959
chr13:95686858-95705438	-	chr13:95705438	4	1	3	0.75	0.0100188
chr13:95695935-95705438	-	chr13:95705438	4	2	1	0.25	0.00333959
chr13:95686858-95735544	-	chr13:95735544	4	1	3	0.75	0.0100188
chr13:95695935-95735544	-	chr13:95735544	4	2	1	0.25	0.00333959
chr13:95829960-95830345	-	chr13:95830345	49	1	35	0.714286	0.116885
chr13:95768175-95830345	-	chr13:95830345	49	2	11	0.22449	0.0367354
chr13:95813442-95830345	-	chr13:95830345	49	3	3	0.061224	0.0100188
chr13:95768175-95840796	-	chr13:95840796	51	1	21	0.411765	0.0701313
chr13:95813442-95840796	-	chr13:95840796	51	2	18	0.352941	0.0601125
chr13:95829960-95840796	-	chr13:95840796	51	3	9	0.176471	0.0300563
chr13:95686858-95840796	-	chr13:95840796	51	4	3	0.058824	0.0100188
chr13:95822785-95847191	-	chr13:95847191	7	1	5	0.714286	0.0166979
chr13:95768175-95847191	-	chr13:95847191	7	2	2	0.285714	0.00667917
chr13:95816631-95860179	-	chr13:95860179	2	1	1	0.5	0.00333959
chr13:95840706-95860179	-	chr13:95860179	2	2	1	0.5	0.00333959
chr13:95858785-95863035	-	chr13:95863035	49	1	39	0.795918	0.130244
chr13:95847089-95863035	-	chr13:95863035	49	2	5	0.102041	0.0166979
chr13:95768175-95863035	-	chr13:95863035	49	3	3	0.061224	0.0100188
chr13:95861687-95863035	-	chr13:95863035	49	4	2	0.040816	0.00667917
chr13:95858785-95900007	-	chr13:95900007	5	1	3	0.6	0.0100188
chr13:95886863-95900007	-	chr13:95900007	5	2	2	0.4	0.00667917
chr13:96282242-96285575	-	chr13:96285575	5	1	4	0.8	0.0133583
chr13:96277021-96285575	-	chr13:96285575	5	2	1	0.2	0.00333959
chr13:96622365-96648389	-	chr13:96648389	2	1	1	0.5	0.00333959
chr13:96636057-96648389	-	chr13:96648389	2	2	1	0.5	0.00333959
chr1:39833819-39838268	+	chr1:39833819	4	1	3	0.75	0.0100188
chr1:39833819-39833986	+	chr1:39833819	4	2	1	0.25	0.00333959
chr13:98865473-98865667	+	chr13:98865473	4	1	3	0.75	0.0100188
chr13:98865473-99030172	+	chr13:98865473	4	2	1	0.25	0.00333959
chr13:99890680-99896878	+	chr13:99890680	81	1	74	0.91358	0.247129
chr13:99890680-99970323	+	chr13:99890680	81	2	7	0.08642	0.0233771
chr1:40654726-40668286	+	chr1:40654726	12	1	10	0.833333	0.0333959
chr1:40654726-40656525	+	chr1:40654726	12	2	2	0.166667	0.00667917
chr1:40733457-40737707	+	chr1:40733457	4	1	3	0.75	0.0100188
chr1:40733457-40747199	+	chr1:40733457	4	2	1	0.25	0.00333959
chr14:102484787-102498804	+	chr14:102484787	12	1	8	0.666667	0.0267167
chr14:102484787-102493044	+	chr14:102484787	12	2	4	0.333333	0.0133583
chr14:102506572-102507010	+	chr14:102506572	356	1	324	0.910112	1.08203
chr14:102506572-102509085	+	chr14:102506572	356	2	32	0.089888	0.106867
chr14:102661274-102676199	+	chr14:102661274	15	1	12	0.8	0.040075
chr14:102661274-102664184	+	chr14:102661274	15	2	3	0.2	0.0100188
chr14:102842986-102931626	+	chr14:102842986	4	1	3	0.75	0.0100188
chr14:102842986-102881130	+	chr14:102842986	4	2	1	0.25	0.00333959
chr14:103336521-103369766	+	chr14:103336521	9	1	6	0.666667	0.0200375
chr14:103336521-103352606	+	chr14:103336521	9	2	3	0.333333	0.0100188
chr14:103449892-103452917	-	chr14:103452917	8	1	6	0.75	0.0200375
chr14:103444462-103452917	-	chr14:103452917	8	2	2	0.25	0.00667917
chr14:103470264-103478525	-	chr14:103478525	24	1	22	0.916667	0.0734709
chr14:103465901-103478525	-	chr14:103478525	24	2	2	0.083333	0.00667917
chr14:103871412-103871604	+	chr14:103871412	9	1	7	0.777778	0.0233771
chr14:103871412-103894777	+	chr14:103871412	9	2	2	0.222222	0.00667917
chr14:103918254-103928798	+	chr14:103918254	4	1	3	0.75	0.0100188
chr14:103918254-103923549	+	chr14:103918254	4	2	1	0.25	0.00333959
chr14:104128452-104129264	+	chr14:104128452	127	1	126	0.992126	0.420788
chr14:104128452-104136620	+	chr14:104128452	127	2	1	0.007874	0.00333959
chr14:105814829-105821514	+	chr14:105814829	18	1	14	0.777778	0.0467542
chr14:105814829-105818804	+	chr14:105814829	18	2	3	0.166667	0.0100188
chr14:105814829-105836237	+	chr14:105814829	18	3	1	0.055556	0.00333959
chr14:105818714-105821514	+	chr14:105818714	32	1	31	0.96875	0.103527
chr14:105818714-105834876	+	chr14:105818714	32	2	1	0.03125	0.00333959
chr14:105905008-105920647	+	chr14:105905008	7	1	4	0.571429	0.0133583
chr14:105905008-105916521	+	chr14:105905008	7	2	2	0.285714	0.00667917
chr14:105905008-105916661	+	chr14:105905008	7	3	1	0.142857	0.00333959
chr1:41463065-41466789	+	chr1:41463065	55	1	54	0.981818	0.180338
chr1:41463065-41467926	+	chr1:41463065	55	2	1	0.018182	0.00333959
chr1:41474465-41475261	+	chr1:41474465	24	1	12	0.5	0.040075
chr1:41474465-41475926	+	chr1:41474465	24	2	12	0.5	0.040075
chr1:41578954-41627104	-	chr1:41627104	5	1	3	0.6	0.0100188
chr1:41536266-41627104	-	chr1:41627104	5	2	2	0.4	0.00667917
chr14:21860308-21860412	-	chr14:21860412	17	1	15	0.882353	0.0500938
chr14:21860309-21860412	-	chr14:21860412	17	2	2	0.117647	0.00667917
chr14:21971315-21972024	-	chr14:21972024	238	1	235	0.987395	0.784803
chr14:21967168-21972024	-	chr14:21972024	238	2	3	0.012605	0.0100188
chr14:23375403-23380612	-	chr14:23380612	137	1	79	0.576642	0.263827
chr14:23378691-23380612	-	chr14:23380612	137	2	58	0.423358	0.193696
chr14:24680620-24681035	-	chr14:24681035	6	1	4	0.666667	0.0133583
chr14:24680616-24681035	-	chr14:24681035	6	2	2	0.333333	0.00667917
chr1:42693553-42776781	-	chr1:42776781	15	1	9	0.6	0.0300563
chr1:42730785-42776781	-	chr1:42776781	15	2	5	0.333333	0.0166979
chr1:42744018-42776781	-	chr1:42776781	15	3	1	0.066667	0.00333959
chr14:31097414-31122794	+	chr14:31097414	4	1	3	0.75	0.0100188
chr14:31097414-31143203	+	chr14:31097414	4	2	1	0.25	0.00333959
chr14:31103152-31122794	+	chr14:31103152	5	1	4	0.8	0.0133583
chr14:31103152-31112611	+	chr14:31103152	5	2	1	0.2	0.00333959
chr14:31404368-31425448	-	chr14:31425448	12	1	10	0.833333	0.0333959
chr14:31424825-31425448	-	chr14:31425448	12	2	2	0.166667	0.00667917
chr14:31590588-31590711	-	chr14:31590711	7	1	4	0.571429	0.0133583
chr14:31585441-31590711	-	chr14:31590711	7	2	3	0.428571	0.0100188
chr14:31602443-31602881	-	chr14:31602881	28	1	18	0.642857	0.0601125
chr14:31585441-31602881	-	chr14:31602881	28	2	4	0.142857	0.0133583
chr14:31596990-31602881	-	chr14:31602881	28	3	4	0.142857	0.0133583
chr14:31581621-31602881	-	chr14:31602881	28	4	2	0.071429	0.00667917
chr14:31596990-31641328	-	chr14:31641328	15	1	9	0.6	0.0300563
chr14:31613316-31641328	-	chr14:31641328	15	2	3	0.2	0.0100188
chr14:31574588-31641328	-	chr14:31641328	15	3	1	0.066667	0.00333959
chr14:31582309-31641328	-	chr14:31641328	15	4	1	0.066667	0.00333959
chr14:31611063-31641328	-	chr14:31641328	15	5	1	0.066667	0.00333959
chr14:31765114-31777226	-	chr14:31777226	3	1	2	0.666667	0.00667917
chr14:31771500-31777226	-	chr14:31777226	3	2	1	0.333333	0.00333959
chr14:32559707-32586493	+	chr14:32559707	22	1	14	0.636364	0.0467542
chr14:32559707-32563592	+	chr14:32559707	22	2	8	0.363636	0.0267167
chr14:36064839-36104804	-	chr14:36104804	3	1	2	0.666667	0.00667917
chr14:36094566-36104804	-	chr14:36104804	3	2	1	0.333333	0.00333959
chr14:36147155-36194359	-	chr14:36194359	4	1	3	0.75	0.0100188
chr14:36133847-36194359	-	chr14:36194359	4	2	1	0.25	0.00333959
chr14:37754522-37838829	+	chr14:37754522	24	1	16	0.666667	0.0534334
chr14:37754522-37777724	+	chr14:37754522	24	2	8	0.333333	0.0267167
chr14:39746137-39796226	+	chr14:39746137	25	1	18	0.72	0.0601125
chr14:39746137-39818181	+	chr14:39746137	25	2	5	0.2	0.0166979
chr14:39746137-39748741	+	chr14:39746137	25	3	2	0.08	0.00667917
chr14:45478115-45501579	+	chr14:45478115	24	1	11	0.458333	0.0367354
chr14:45478115-45523752	+	chr14:45478115	24	2	8	0.333333	0.0267167
chr14:45478115-45537846	+	chr14:45478115	24	3	3	0.125	0.0100188
chr14:45478115-45512994	+	chr14:45478115	24	4	2	0.083333	0.00667917
chr14:45481177-45501579	+	chr14:45481177	3	1	2	0.666667	0.00667917
chr14:45481177-45523752	+	chr14:45481177	3	2	1	0.333333	0.00333959
chr14:45686221-45716580	-	chr14:45716580	4	1	2	0.5	0.00667917
chr14:45715945-45716580	-	chr14:45716580	4	2	2	0.5	0.00667917
chr1:44773981-44785416	-	chr1:44785416	29	1	20	0.689655	0.0667917
chr1:44713610-44785416	-	chr1:44785416	29	2	5	0.172414	0.0166979
chr1:44750506-44785416	-	chr1:44785416	29	3	4	0.137931	0.0133583
chr1:44773981-44804994	-	chr1:44804994	34	1	15	0.441176	0.0500938
chr1:44804716-44804994	-	chr1:44804994	34	2	14	0.411765	0.0467542
chr1:44778840-44804994	-	chr1:44804994	34	3	3	0.088235	0.0100188
chr1:44750506-44804994	-	chr1:44804994	34	4	2	0.058824	0.00667917
chr14:50130032-50141145	-	chr14:50141145	10	1	6	0.6	0.0200375
chr14:50136241-50141145	-	chr14:50141145	10	2	4	0.4	0.0133583
chr14:50616725-50616948	-	chr14:50616948	13	1	11	0.846154	0.0367354
chr14:50600840-50616948	-	chr14:50616948	13	2	2	0.153846	0.00667917
chr14:50586992-50625364	-	chr14:50625364	2	1	1	0.5	0.00333959
chr14:50611887-50625364	-	chr14:50625364	2	2	1	0.5	0.00333959
chr14:50647289-50671127	-	chr14:50671127	5	1	4	0.8	0.0133583
chr14:50666408-50671127	-	chr14:50671127	5	2	1	0.2	0.00333959
chr14:50923233-50930851	-	chr14:50930851	3	1	2	0.666667	0.00667917
chr14:50929382-50930851	-	chr14:50930851	3	2	1	0.333333	0.00333959
chr14:50952295-50952912	-	chr14:50952912	4	1	3	0.75	0.0100188
chr14:50929382-50952912	-	chr14:50952912	4	2	1	0.25	0.00333959
chr14:51259429-51288795	-	chr14:51288795	12	1	5	0.416667	0.0166979
chr14:51288591-51288795	-	chr14:51288795	12	2	4	0.333333	0.0133583
chr14:51273454-51288795	-	chr14:51288795	12	3	3	0.25	0.0100188
chr14:51489552-51492078	-	chr14:51492078	11	1	4	0.363636	0.0133583
chr14:51467400-51492078	-	chr14:51492078	11	2	3	0.272727	0.0100188
chr14:51464767-51492078	-	chr14:51492078	11	3	2	0.181818	0.00667917
chr14:51475797-51492078	-	chr14:51492078	11	4	2	0.181818	0.00667917
chr14:51710573-51716483	+	chr14:51710573	14	1	13	0.928571	0.0434146
chr14:51710573-51713938	+	chr14:51710573	14	2	1	0.071429	0.00333959
chr14:52156408-52174951	+	chr14:52156408	2	1	1	0.5	0.00333959
chr14:52156408-52179269	+	chr14:52156408	2	2	1	0.5	0.00333959
chr1:45223227-45223812	+	chr1:45223227	38	1	25	0.657895	0.0834896
chr1:45223227-45225020	+	chr1:45223227	38	2	11	0.289474	0.0367354
chr1:45223227-45226374	+	chr1:45223227	38	3	2	0.052632	0.00667917
chr14:55203741-55204005	+	chr14:55203741	9	1	6	0.666667	0.0200375
chr14:55203741-55231258	+	chr14:55203741	9	2	3	0.333333	0.0100188
chr14:55451440-55454105	-	chr14:55454105	9	1	6	0.666667	0.0200375
chr14:55448257-55454105	-	chr14:55454105	9	2	3	0.333333	0.0100188
chr14:55451440-55467710	-	chr14:55467710	6	1	3	0.5	0.0100188
chr14:55457930-55467710	-	chr14:55467710	6	2	2	0.333333	0.00667917
chr14:55462320-55467710	-	chr14:55467710	6	3	1	0.166667	0.00333959
chr14:57696451-57714430	-	chr14:57714430	2	1	1	0.5	0.00333959
chr14:57713428-57714430	-	chr14:57714430	2	2	1	0.5	0.00333959
chr14:58724462-58724716	+	chr14:58724462	4	1	3	0.75	0.0100188
chr14:58724462-58727738	+	chr14:58724462	4	2	1	0.25	0.00333959
chr14:58949230-58965678	+	chr14:58949230	6	1	3	0.5	0.0100188
chr14:58949230-58979345	+	chr14:58949230	6	2	3	0.5	0.0100188
chr14:59923155-59946069	-	chr14:59946069	23	1	18	0.782609	0.0601125
chr14:59925574-59946069	-	chr14:59946069	23	2	5	0.217391	0.0166979
chr14:59954391-59965626	+	chr14:59954391	7	1	6	0.857143	0.0200375
chr14:59954391-59961942	+	chr14:59954391	7	2	1	0.142857	0.00333959
chr14:61275042-61285565	+	chr14:61275042	3	1	2	0.666667	0.00667917
chr14:61275042-61346553	+	chr14:61275042	3	2	1	0.333333	0.00333959
chr14:62187099-62188541	+	chr14:62187099	4	1	3	0.75	0.0100188
chr14:62187099-62194373	+	chr14:62187099	4	2	1	0.25	0.00333959
chr14:62193423-62194373	+	chr14:62193423	4	1	3	0.75	0.0100188
chr14:62193423-62205091	+	chr14:62193423	4	2	1	0.25	0.00333959
chr1:46290104-46290252	+	chr1:46290104	4	1	2	0.5	0.00667917
chr1:46290104-46295253	+	chr1:46290104	4	2	2	0.5	0.00667917
chr14:64884605-64891649	+	chr14:64884605	6	1	5	0.833333	0.0166979
chr14:64884605-64886643	+	chr14:64884605	6	2	1	0.166667	0.00333959
chr14:64906843-64916340	+	chr14:64906843	9	1	5	0.555556	0.0166979
chr14:64906843-64908171	+	chr14:64906843	9	2	4	0.444444	0.0133583
chr14:64908771-64920579	+	chr14:64908771	14	1	9	0.642857	0.0300563
chr14:64908771-64916340	+	chr14:64908771	14	2	5	0.357143	0.0166979
chr14:65507507-65511161	+	chr14:65507507	3	1	2	0.666667	0.00667917
chr14:65507507-65521407	+	chr14:65507507	3	2	1	0.333333	0.00333959
chr14:65922338-65922436	+	chr14:65922338	2	1	1	0.5	0.00333959
chr14:65922338-66096324	+	chr14:65922338	2	2	1	0.5	0.00333959
chr14:66028054-66028484	+	chr14:66028054	52	1	50	0.961538	0.166979
chr14:66028054-66096324	+	chr14:66028054	52	2	2	0.038462	0.00667917
chr14:67431907-67490392	+	chr14:67431907	59	1	39	0.661017	0.130244
chr14:67431907-67525503	+	chr14:67431907	59	2	20	0.338983	0.0667917
chr14:69387722-69392389	-	chr14:69392389	16	1	11	0.6875	0.0367354
chr14:69378872-69392389	-	chr14:69392389	16	2	4	0.25	0.0133583
chr14:69376034-69392389	-	chr14:69392389	16	3	1	0.0625	0.00333959
chr14:71215545-71216798	-	chr14:71216798	13	1	11	0.846154	0.0367354
chr14:71209067-71216798	-	chr14:71216798	13	2	2	0.153846	0.00667917
chr14:71413631-71413840	+	chr14:71413631	28	1	9	0.321429	0.0300563
chr14:71413631-71445365	+	chr14:71413631	28	2	7	0.25	0.0233771
chr14:71413631-71455416	+	chr14:71413631	28	3	6	0.214286	0.0200375
chr14:71413631-71462642	+	chr14:71413631	28	4	3	0.107143	0.0100188
chr14:71413631-71502874	+	chr14:71413631	28	5	2	0.071429	0.00667917
chr14:71413631-71435827	+	chr14:71413631	28	6	1	0.035714	0.00333959
chr14:71428942-71445365	+	chr14:71428942	20	1	12	0.6	0.040075
chr14:71428942-71479919	+	chr14:71428942	20	2	7	0.35	0.0233771
chr14:71428942-71462642	+	chr14:71428942	20	3	1	0.05	0.00333959
chr14:71443658-71462642	+	chr14:71443658	23	1	20	0.869565	0.0667917
chr14:71443658-71476441	+	chr14:71443658	23	2	2	0.086957	0.00667917
chr14:71443658-71489949	+	chr14:71443658	23	3	1	0.043478	0.00333959
chr14:71455283-71462642	+	chr14:71455283	62	1	36	0.580645	0.120225
chr14:71455283-71476441	+	chr14:71455283	62	2	12	0.193548	0.040075
chr14:71455283-71479919	+	chr14:71455283	62	3	8	0.129032	0.0267167
chr14:71455283-71485879	+	chr14:71455283	62	4	4	0.064516	0.0133583
chr14:71455283-71556059	+	chr14:71455283	62	5	2	0.032258	0.00667917
chr14:71476350-71502874	+	chr14:71476350	16	1	7	0.4375	0.0233771
chr14:71476350-71485879	+	chr14:71476350	16	2	5	0.3125	0.0166979
chr14:71476350-71524441	+	chr14:71476350	16	3	2	0.125	0.00667917
chr14:71476350-71572157	+	chr14:71476350	16	4	2	0.125	0.00667917
chr14:71479716-71524441	+	chr14:71479716	7	1	4	0.571429	0.0133583
chr14:71479716-71502874	+	chr14:71479716	7	2	3	0.428571	0.0100188
chr14:73459850-73460065	-	chr14:73460065	14	1	13	0.928571	0.0434146
chr14:73444634-73460065	-	chr14:73460065	14	2	1	0.071429	0.00333959
chr14:73614502-73614802	+	chr14:73614502	325	1	159	0.489231	0.530994
chr14:73614502-73614814	+	chr14:73614502	325	2	116	0.356923	0.387392
chr14:73614502-73640415	+	chr14:73614502	325	3	39	0.12	0.130244
chr14:73614502-73626846	+	chr14:73614502	325	4	9	0.027692	0.0300563
chr14:73614502-73653628	+	chr14:73614502	325	5	2	0.006154	0.00667917
chr14:73637504-73640415	+	chr14:73637504	14	1	11	0.785714	0.0367354
chr14:73637504-73653628	+	chr14:73637504	14	2	3	0.214286	0.0100188
chr14:74360499-74370813	+	chr14:74360499	8	1	6	0.75	0.0200375
chr14:74360499-74364965	+	chr14:74360499	8	2	2	0.25	0.00667917
chr14:75247107-75269379	+	chr14:75247107	10	1	8	0.8	0.0267167
chr14:75247107-75249028	+	chr14:75247107	10	2	2	0.2	0.00667917
chr14:75563802-75568468	-	chr14:75568468	7	1	4	0.571429	0.0133583
chr14:75567694-75568468	-	chr14:75568468	7	2	3	0.428571	0.0100188
chr14:75567694-75570700	-	chr14:75570700	15	1	14	0.933333	0.0467542
chr14:75562074-75570700	-	chr14:75570700	15	2	1	0.066667	0.00333959
chr14:75576387-75587877	-	chr14:75587877	4	1	3	0.75	0.0100188
chr14:75583897-75587877	-	chr14:75587877	4	2	1	0.25	0.00333959
chr14:75590748-75590926	-	chr14:75590926	31	1	16	0.516129	0.0534334
chr14:75553720-75590926	-	chr14:75590926	31	2	4	0.129032	0.0133583
chr14:75562074-75590926	-	chr14:75590926	31	3	4	0.129032	0.0133583
chr14:75567694-75590926	-	chr14:75590926	31	4	4	0.129032	0.0133583
chr14:75576387-75590926	-	chr14:75590926	31	5	2	0.064516	0.00667917
chr14:75580041-75590926	-	chr14:75590926	31	6	1	0.032258	0.00333959
chr14:76173360-76201632	+	chr14:76173360	16	1	11	0.6875	0.0367354
chr14:76173360-76187046	+	chr14:76173360	16	2	4	0.25	0.0133583
chr14:76173360-76174050	+	chr14:76173360	16	3	1	0.0625	0.00333959
chr14:76184203-76187046	+	chr14:76184203	17	1	16	0.941176	0.0534334
chr14:76184203-76201632	+	chr14:76184203	17	2	1	0.058824	0.00333959
chr14:76198680-76203950	+	chr14:76198680	20	1	11	0.55	0.0367354
chr14:76198680-76201632	+	chr14:76198680	20	2	9	0.45	0.0300563
chr14:76633005-76662315	+	chr14:76633005	171	1	92	0.538012	0.307242
chr14:76633005-76647192	+	chr14:76633005	171	2	70	0.409357	0.233771
chr14:76633005-76644385	+	chr14:76633005	171	3	9	0.052632	0.0300563
chr14:76638185-76647192	+	chr14:76638185	4	1	2	0.5	0.00667917
chr14:76638185-76662315	+	chr14:76638185	4	2	2	0.5	0.00667917
chr1:47725960-47737913	-	chr1:47737913	9	1	7	0.777778	0.0233771
chr1:47728574-47737913	-	chr1:47737913	9	2	2	0.222222	0.00667917
chr1:47745912-47770668	-	chr1:47770668	13	1	7	0.538462	0.0233771
chr1:47761436-47770668	-	chr1:47770668	13	2	6	0.461538	0.0200375
chr14:77910591-77920445	-	chr14:77920445	6	1	5	0.833333	0.0166979
chr14:77914836-77920445	-	chr14:77920445	6	2	1	0.166667	0.00333959
chr14:77930940-77934851	+	chr14:77930940	11	1	6	0.545455	0.0200375
chr14:77930940-77932010	+	chr14:77930940	11	2	5	0.454545	0.0166979
chr14:80963811-80997230	-	chr14:80997230	4	1	2	0.5	0.00667917
chr14:80971254-80997230	-	chr14:80997230	4	2	1	0.25	0.00333959
chr14:80993212-80997230	-	chr14:80997230	4	3	1	0.25	0.00333959
chr14:81297486-81307112	-	chr14:81307112	6	1	5	0.833333	0.0166979
chr14:81209418-81307112	-	chr14:81307112	6	2	1	0.166667	0.00333959
chr14:81958823-81961481	-	chr14:81961481	7	1	6	0.857143	0.0200375
chr14:81952015-81961481	-	chr14:81961481	7	2	1	0.142857	0.00333959
chr14:81969064-81972585	-	chr14:81972585	8	1	6	0.75	0.0200375
chr14:81945955-81972585	-	chr14:81972585	8	2	2	0.25	0.00667917
chr1:48877135-48878823	-	chr1:48878823	4	1	3	0.75	0.0100188
chr1:48860938-48878823	-	chr1:48878823	4	2	1	0.25	0.00333959
chr14:89319314-89338796	+	chr14:89319314	13	1	11	0.846154	0.0367354
chr14:89319314-89327676	+	chr14:89319314	13	2	2	0.153846	0.00667917
chr14:91211135-91252672	-	chr14:91252672	8	1	5	0.625	0.0166979
chr14:91110391-91252672	-	chr14:91252672	8	2	3	0.375	0.0100188
chr14:91444649-91467503	-	chr14:91467503	3	1	2	0.666667	0.00667917
chr14:91409421-91467503	-	chr14:91467503	3	2	1	0.333333	0.00333959
chr14:97299803-97304154	+	chr14:97299803	17	1	7	0.411765	0.0233771
chr14:97299803-97327072	+	chr14:97299803	17	2	5	0.294118	0.0166979
chr14:97299803-97342457	+	chr14:97299803	17	3	4	0.235294	0.0133583
chr14:97299803-97313681	+	chr14:97299803	17	4	1	0.058824	0.00333959
chr15:101775286-101775782	-	chr15:101775782	31	1	30	0.967742	0.100188
chr15:101728197-101775782	-	chr15:101775782	31	2	1	0.032258	0.00333959
chr1:51005263-51061888	-	chr1:51061888	8	1	5	0.625	0.0166979
chr1:51032748-51061888	-	chr1:51061888	8	2	3	0.375	0.0100188
chr1:51868106-51874004	-	chr1:51874004	16	1	13	0.8125	0.0434146
chr1:51871576-51874004	-	chr1:51874004	16	2	3	0.1875	0.0100188
chr1:52211207-52231653	+	chr1:52211207	6	1	3	0.5	0.0100188
chr1:52211207-52238395	+	chr1:52211207	6	2	3	0.5	0.0100188
chr1:52215816-52227643	+	chr1:52215816	18	1	15	0.833333	0.0500938
chr1:52215816-52231653	+	chr1:52215816	18	2	3	0.166667	0.0100188
chr1:52226361-52231653	+	chr1:52226361	5	1	2	0.4	0.00667917
chr1:52226361-52248315	+	chr1:52226361	5	2	2	0.4	0.00667917
chr1:52226361-52227643	+	chr1:52226361	5	3	1	0.2	0.00333959
chr15:22835915-22846952	+	chr15:22835915	6	1	4	0.666667	0.0133583
chr15:22835915-22851109	+	chr15:22835915	6	2	2	0.333333	0.00667917
chr1:52293467-52299842	-	chr1:52299842	28	1	23	0.821429	0.0768105
chr1:52285471-52299842	-	chr1:52299842	28	2	4	0.142857	0.0133583
chr1:52275952-52299842	-	chr1:52299842	28	3	1	0.035714	0.00333959
chr15:23338852-23339028	-	chr15:23339028	23	1	22	0.956522	0.0734709
chr15:23333848-23339028	-	chr15:23339028	23	2	1	0.043478	0.00333959
chr15:25650607-25657118	-	chr15:25657118	25	1	24	0.96	0.08015
chr15:25654234-25657118	-	chr15:25657118	25	2	1	0.04	0.00333959
chr15:26825465-26828561	-	chr15:26828561	63	1	54	0.857143	0.180338
chr15:26806078-26828561	-	chr15:26828561	63	2	9	0.142857	0.0300563
chr15:28874411-28874587	+	chr15:28874411	10	1	7	0.7	0.0233771
chr15:28874411-28908666	+	chr15:28874411	10	2	2	0.2	0.00667917
chr15:28874411-28878886	+	chr15:28874411	10	3	1	0.1	0.00333959
chr15:30053341-30065560	-	chr15:30065560	93	1	92	0.989247	0.307242
chr15:30058468-30065560	-	chr15:30065560	93	2	1	0.010753	0.00333959
chr15:30922905-30939917	+	chr15:30922905	2	1	1	0.5	0.00333959
chr15:30922905-31042759	+	chr15:30922905	2	2	1	0.5	0.00333959
chr15:31947298-31949280	-	chr15:31949280	6	1	5	0.833333	0.0166979
chr15:31941881-31949280	-	chr15:31949280	6	2	1	0.166667	0.00333959
chr15:32819013-32825569	-	chr15:32825569	2	1	1	0.5	0.00333959
chr15:32820732-32825569	-	chr15:32825569	2	2	1	0.5	0.00333959
chr1:53326402-53333449	+	chr1:53326402	5	1	3	0.6	0.0100188
chr1:53326402-53343515	+	chr1:53326402	5	2	2	0.4	0.00667917
chr15:40699836-40700189	+	chr15:40699836	6	1	5	0.833333	0.0166979
chr15:40699836-40708561	+	chr15:40699836	6	2	1	0.166667	0.00333959
chr15:41297790-41319934	-	chr15:41319934	18	1	11	0.611111	0.0367354
chr15:41289726-41319934	-	chr15:41319934	18	2	7	0.388889	0.0233771
chr15:41377566-41379880	-	chr15:41379880	8	1	7	0.875	0.0233771
chr15:41361767-41379880	-	chr15:41379880	8	2	1	0.125	0.00333959
chr15:41373217-41388551	-	chr15:41388551	2	1	1	0.5	0.00333959
chr15:41387798-41388551	-	chr15:41388551	2	2	1	0.5	0.00333959
chr15:41535864-41555081	+	chr15:41535864	13	1	7	0.538462	0.0233771
chr15:41535864-41562816	+	chr15:41535864	13	2	6	0.461538	0.0200375
chr15:41961025-41962156	+	chr15:41961025	56	1	50	0.892857	0.166979
chr15:41961025-41991357	+	chr15:41961025	56	2	6	0.107143	0.0200375
chr15:41988272-41991357	+	chr15:41988272	27	1	22	0.814815	0.0734709
chr15:41988272-42005694	+	chr15:41988272	27	2	3	0.111111	0.0100188
chr15:41988272-42021547	+	chr15:41988272	27	3	2	0.074074	0.00667917
chr15:42553155-42560230	-	chr15:42560230	3	1	2	0.666667	0.00667917
chr15:42525410-42560230	-	chr15:42560230	3	2	1	0.333333	0.00333959
chr1:54266365-54293846	-	chr1:54293846	4	1	3	0.75	0.0100188
chr1:54269600-54293846	-	chr1:54293846	4	2	1	0.25	0.00333959
chr1:54269600-54298264	-	chr1:54298264	6	1	4	0.666667	0.0133583
chr1:54266365-54298264	-	chr1:54298264	6	2	2	0.333333	0.00667917
chr15:43102811-43109295	-	chr15:43109295	22	1	13	0.590909	0.0434146
chr15:43086841-43109295	-	chr15:43109295	22	2	9	0.409091	0.0300563
chr15:43103885-43122276	-	chr15:43122276	3	1	2	0.666667	0.00667917
chr15:43102811-43122276	-	chr15:43122276	3	2	1	0.333333	0.00333959
chr15:43120125-43132631	-	chr15:43132631	25	1	17	0.68	0.056773
chr15:43069228-43132631	-	chr15:43132631	25	2	3	0.12	0.0100188
chr15:43067332-43132631	-	chr15:43132631	25	3	2	0.08	0.00667917
chr15:43102811-43132631	-	chr15:43132631	25	4	2	0.08	0.00667917
chr15:43109229-43132631	-	chr15:43132631	25	5	1	0.04	0.00333959
chr15:43242459-43258484	-	chr15:43258484	8	1	5	0.625	0.0166979
chr15:43250210-43258484	-	chr15:43258484	8	2	3	0.375	0.0100188
chr15:43692241-43694048	+	chr15:43692241	44	1	42	0.954545	0.140263
chr15:43692241-43696750	+	chr15:43692241	44	2	2	0.045455	0.00667917
chr15:43748089-43762264	-	chr15:43762264	4	1	3	0.75	0.0100188
chr15:43712502-43762264	-	chr15:43762264	4	2	1	0.25	0.00333959
chr15:44046021-44048964	+	chr15:44046021	9	1	7	0.777778	0.0233771
chr15:44046021-44060795	+	chr15:44046021	9	2	2	0.222222	0.00667917
chr15:44620882-44673174	+	chr15:44620882	9	1	5	0.555556	0.0166979
chr15:44620882-44630515	+	chr15:44620882	9	2	4	0.444444	0.0133583
chr15:44861595-44862856	-	chr15:44862856	10	1	6	0.6	0.0200375
chr15:44859621-44862856	-	chr15:44862856	10	2	4	0.4	0.0133583
chr15:49528047-49531564	+	chr15:49528047	34	1	22	0.647059	0.0734709
chr15:49528047-49575915	+	chr15:49528047	34	2	5	0.147059	0.0166979
chr15:49528047-49584734	+	chr15:49528047	34	3	5	0.147059	0.0166979
chr15:49528047-49612002	+	chr15:49528047	34	4	2	0.058824	0.00667917
chr15:50592985-50601995	-	chr15:50601995	22	1	19	0.863636	0.0634521
chr15:50581679-50601995	-	chr15:50601995	22	2	3	0.136364	0.0100188
chr15:50875285-50884823	-	chr15:50884823	10	1	5	0.5	0.0166979
chr15:50878588-50884823	-	chr15:50884823	10	2	5	0.5	0.0166979
chr15:50923613-50941082	-	chr15:50941082	6	1	2	0.333333	0.00667917
chr15:50935536-50941082	-	chr15:50941082	6	2	2	0.333333	0.00667917
chr15:50940883-50941082	-	chr15:50941082	6	3	2	0.333333	0.00667917
chr15:50949977-50955243	-	chr15:50955243	10	1	5	0.5	0.0166979
chr15:50935536-50955243	-	chr15:50955243	10	2	4	0.4	0.0133583
chr15:50923613-50955243	-	chr15:50955243	10	3	1	0.1	0.00333959
chr15:51039691-51041067	-	chr15:51041067	6	1	5	0.833333	0.0166979
chr15:51031876-51041067	-	chr15:51041067	6	2	1	0.166667	0.00333959
chr15:51028297-51041943	-	chr15:51041943	12	1	6	0.5	0.0200375
chr15:51012136-51041943	-	chr15:51041943	12	2	3	0.25	0.0100188
chr15:51040309-51041943	-	chr15:51041943	12	3	2	0.166667	0.00667917
chr15:51014320-51041943	-	chr15:51041943	12	4	1	0.083333	0.00333959
chr15:51868252-51868378	-	chr15:51868378	7	1	4	0.571429	0.0133583
chr15:51855577-51868378	-	chr15:51868378	7	2	3	0.428571	0.0100188
chr15:52664320-52702673	-	chr15:52702673	6	1	4	0.666667	0.0133583
chr15:52697483-52702673	-	chr15:52702673	6	2	2	0.333333	0.00667917
chr15:53889275-53998271	-	chr15:53998271	21	1	9	0.428571	0.0300563
chr15:53957768-53998271	-	chr15:53998271	21	2	9	0.428571	0.0300563
chr15:53901709-53998271	-	chr15:53998271	21	3	2	0.095238	0.00667917
chr15:53998123-53998271	-	chr15:53998271	21	4	1	0.047619	0.00333959
chr15:55619728-55634000	+	chr15:55619728	6	1	3	0.5	0.0100188
chr15:55619728-55631516	+	chr15:55619728	6	2	2	0.333333	0.00667917
chr15:55619728-55626205	+	chr15:55619728	6	3	1	0.166667	0.00333959
chr15:55931839-55933406	-	chr15:55933406	9	1	6	0.666667	0.0200375
chr15:55929367-55933406	-	chr15:55933406	9	2	3	0.333333	0.0100188
chr15:56434975-56471501	-	chr15:56471501	11	1	7	0.636364	0.0233771
chr15:56471256-56471501	-	chr15:56471501	11	2	4	0.363636	0.0133583
chr15:57212089-57384089	+	chr15:57212089	9	1	5	0.555556	0.0166979
chr15:57212089-57545666	+	chr15:57212089	9	2	3	0.333333	0.0100188
chr15:57212089-57213296	+	chr15:57212089	9	3	1	0.111111	0.00333959
chr15:57535669-57545666	+	chr15:57535669	6	1	4	0.666667	0.0133583
chr15:57535669-57535748	+	chr15:57535669	6	2	2	0.333333	0.00667917
chr15:59323002-59323901	+	chr15:59323002	6	1	3	0.5	0.0100188
chr15:59323002-59359282	+	chr15:59323002	6	2	3	0.5	0.0100188
chr15:59376327-59377984	+	chr15:59376327	13	1	9	0.692308	0.0300563
chr15:59376327-59381958	+	chr15:59376327	13	2	4	0.307692	0.0133583
chr15:59470591-59480415	-	chr15:59480415	12	1	11	0.916667	0.0367354
chr15:59445788-59480415	-	chr15:59480415	12	2	1	0.083333	0.00333959
chr15:59487659-59510286	-	chr15:59510286	50	1	23	0.46	0.0768105
chr15:59497598-59510286	-	chr15:59510286	50	2	8	0.16	0.0267167
chr15:59494524-59510286	-	chr15:59510286	50	3	6	0.12	0.0200375
chr15:59480316-59510286	-	chr15:59510286	50	4	5	0.1	0.0166979
chr15:59445788-59510286	-	chr15:59510286	50	5	4	0.08	0.0133583
chr15:59470591-59510286	-	chr15:59510286	50	6	4	0.08	0.0133583
chr15:60648117-60656722	-	chr15:60656722	40	1	30	0.75	0.100188
chr15:60653139-60656722	-	chr15:60656722	40	2	7	0.175	0.0233771
chr15:60641273-60656722	-	chr15:60656722	40	3	1	0.025	0.00333959
chr15:60643391-60656722	-	chr15:60656722	40	4	1	0.025	0.00333959
chr15:60653140-60656722	-	chr15:60656722	40	5	1	0.025	0.00333959
chr15:60648117-60674640	-	chr15:60674640	8	1	6	0.75	0.0200375
chr15:60653139-60674640	-	chr15:60674640	8	2	2	0.25	0.00667917
chr15:60674540-60678285	-	chr15:60678285	33	1	27	0.818182	0.0901688
chr15:60656627-60678285	-	chr15:60678285	33	2	4	0.121212	0.0133583
chr15:60653139-60678285	-	chr15:60678285	33	3	2	0.060606	0.00667917
chr15:62299506-62306191	-	chr15:62306191	6	1	3	0.5	0.0100188
chr15:62300853-62306191	-	chr15:62306191	6	2	3	0.5	0.0100188
chr15:63821212-63829355	+	chr15:63821212	67	1	43	0.641791	0.143602
chr15:63821212-63855207	+	chr15:63821212	67	2	15	0.223881	0.0500938
chr15:63821212-63866602	+	chr15:63821212	67	3	6	0.089552	0.0200375
chr15:63821212-63848947	+	chr15:63821212	67	4	2	0.029851	0.00667917
chr15:63821212-63826117	+	chr15:63821212	67	5	1	0.014925	0.00333959
chr15:63824845-63855207	+	chr15:63824845	97	1	58	0.597938	0.193696
chr15:63824845-63852169	+	chr15:63824845	97	2	21	0.216495	0.0701313
chr15:63824845-63866602	+	chr15:63824845	97	3	11	0.113402	0.0367354
chr15:63824845-63829355	+	chr15:63824845	97	4	7	0.072165	0.0233771
chr15:63845913-63855207	+	chr15:63845913	45	1	30	0.666667	0.100188
chr15:63845913-63852169	+	chr15:63845913	45	2	7	0.155556	0.0233771
chr15:63845913-63850387	+	chr15:63845913	45	3	4	0.088889	0.0133583
chr15:63845913-63866602	+	chr15:63845913	45	4	4	0.088889	0.0133583
chr15:63988322-64008672	-	chr15:64008672	12	1	9	0.75	0.0300563
chr15:63956668-64008672	-	chr15:64008672	12	2	3	0.25	0.0100188
chr15:64410315-64411053	+	chr15:64410315	15	1	12	0.8	0.040075
chr15:64410315-64415745	+	chr15:64410315	15	2	3	0.2	0.0100188
chr15:64495280-64508912	-	chr15:64508912	16	1	14	0.875	0.0467542
chr15:64496639-64508912	-	chr15:64508912	16	2	2	0.125	0.00667917
chr15:65042541-65043837	-	chr15:65043837	11	1	10	0.909091	0.0333959
chr15:65033371-65043837	-	chr15:65043837	11	2	1	0.090909	0.00333959
chr15:65114464-65116553	-	chr15:65116553	3	1	2	0.666667	0.00667917
chr15:65115976-65116553	-	chr15:65116553	3	2	1	0.333333	0.00333959
chr15:65273201-65273363	-	chr15:65273363	9	1	7	0.777778	0.0233771
chr15:65266939-65273363	-	chr15:65273363	9	2	2	0.222222	0.00667917
chr15:65273201-65275931	-	chr15:65275931	32	1	15	0.46875	0.0500938
chr15:65266939-65275931	-	chr15:65275931	32	2	14	0.4375	0.0467542
chr15:65257660-65275931	-	chr15:65275931	32	3	3	0.09375	0.0100188
chr15:65771217-65772737	-	chr15:65772737	13	1	6	0.461538	0.0200375
chr15:65756098-65772737	-	chr15:65772737	13	2	3	0.230769	0.0100188
chr15:65759015-65772737	-	chr15:65772737	13	3	3	0.230769	0.0100188
chr15:65743336-65772737	-	chr15:65772737	13	4	1	0.076923	0.00333959
chr15:65766546-65773953	-	chr15:65773953	5	1	3	0.6	0.0100188
chr15:65746600-65773953	-	chr15:65773953	5	2	1	0.2	0.00333959
chr15:65771217-65773953	-	chr15:65773953	5	3	1	0.2	0.00333959
chr15:65759015-65777498	-	chr15:65777498	4	1	2	0.5	0.00667917
chr15:65766546-65777498	-	chr15:65777498	4	2	2	0.5	0.00667917
chr15:65844013-65856680	+	chr15:65844013	9	1	8	0.888889	0.0267167
chr15:65844013-65864704	+	chr15:65844013	9	2	1	0.111111	0.00333959
chr15:66021409-66031213	-	chr15:66031213	8	1	7	0.875	0.0233771
chr15:66030044-66031213	-	chr15:66031213	8	2	1	0.125	0.00333959
chr15:66821189-66832548	+	chr15:66821189	5	1	3	0.6	0.0100188
chr15:66821189-66825351	+	chr15:66821189	5	2	2	0.4	0.00667917
chr15:66824584-66839043	+	chr15:66824584	9	1	5	0.555556	0.0166979
chr15:66824584-66832548	+	chr15:66824584	9	2	4	0.444444	0.0133583
chr15:67004005-67008836	+	chr15:67004005	101	1	95	0.940594	0.317261
chr15:67004005-67009478	+	chr15:67004005	101	2	6	0.059406	0.0200375
chr15:67457232-67462942	+	chr15:67457232	14	1	11	0.785714	0.0367354
chr15:67457232-67459191	+	chr15:67457232	14	2	3	0.214286	0.0100188
chr15:68434283-68439038	+	chr15:68434283	61	1	28	0.459016	0.0935084
chr15:68434283-68466230	+	chr15:68434283	61	2	16	0.262295	0.0534334
chr15:68434283-68457142	+	chr15:68434283	61	3	14	0.229508	0.0467542
chr15:68434283-68476005	+	chr15:68434283	61	4	3	0.04918	0.0100188
chr15:68506627-68510988	-	chr15:68510988	5	1	3	0.6	0.0100188
[truncated: 4,874 more rows]

## Sheet: A549_A3BS
Chrom:Start-End	Strand	Common 5' back-splice site	Total junction reads of common 5' back-splice site	Index of alternative 3' back-splice site	Junction reads of this alternative 3' back-splice site	PCU (alternative 3' back-splice site)	RPM (junction reads of circRNA)
chr10:101571292-101572901	+	chr10:101572901	34	1	25	0.735294	0.0834896
chr10:101556853-101572901	+	chr10:101572901	34	2	9	0.264706	0.0300563
chr10:101590063-101596047	+	chr10:101596047	9	1	7	0.777778	0.0233771
chr10:101577064-101596047	+	chr10:101596047	9	2	2	0.222222	0.00667917
chr10:101594136-101601850	+	chr10:101601850	21	1	11	0.52381	0.0367354
chr10:101591367-101601850	+	chr10:101601850	21	2	8	0.380952	0.0267167
chr10:101590063-101601850	+	chr10:101601850	21	3	2	0.095238	0.00667917
chr10:101591367-101606884	+	chr10:101606884	28	1	19	0.678571	0.0634521
chr10:101601723-101606884	+	chr10:101606884	28	2	5	0.178571	0.0166979
chr10:101590063-101606884	+	chr10:101606884	28	3	4	0.142857	0.0133583
chr10:101996606-102003534	-	chr10:101996606	5	1	3	0.6	0.0100188
chr10:101996606-101997988	-	chr10:101996606	5	2	2	0.4	0.00667917
chr10:102683731-102685776	+	chr10:102685776	8	1	5	0.625	0.0166979
chr10:102678140-102685776	+	chr10:102685776	8	2	3	0.375	0.0100188
chr10:103190101-103239214	+	chr10:103239214	3	1	2	0.666667	0.00667917
chr10:103213257-103239214	+	chr10:103239214	3	2	1	0.333333	0.00333959
chr10:103384501-103436193	-	chr10:103384501	17	1	13	0.764706	0.0434146
chr10:103384501-103433430	-	chr10:103384501	17	2	4	0.235294	0.0133583
chr10:103427642-103436193	-	chr10:103427642	164	1	160	0.97561	0.534334
chr10:103427642-103433430	-	chr10:103427642	164	2	4	0.02439	0.0133583
chr10:103432671-103436193	-	chr10:103432671	54	1	47	0.87037	0.156961
chr10:103432671-103433430	-	chr10:103432671	54	2	7	0.12963	0.0233771
chr10:103552595-103570071	-	chr10:103552595	12	1	9	0.75	0.0300563
chr10:103552595-103567658	-	chr10:103552595	12	2	3	0.25	0.0100188
chr10:103557736-103567658	-	chr10:103557736	9	1	5	0.555556	0.0166979
chr10:103557736-103560157	-	chr10:103557736	9	2	2	0.222222	0.00667917
chr10:103557736-103573363	-	chr10:103557736	9	3	2	0.222222	0.00667917
chr10:103649168-103699695	-	chr10:103649168	14	1	8	0.571429	0.0267167
chr10:103649168-103717489	-	chr10:103649168	14	2	6	0.428571	0.0200375
chr10:103699619-103717489	-	chr10:103699619	32	1	26	0.8125	0.0868292
chr10:103699619-103769206	-	chr10:103699619	32	2	3	0.09375	0.0100188
chr10:103699619-103799882	-	chr10:103699619	32	3	3	0.09375	0.0100188
chr10:103716353-103717489	-	chr10:103716353	16	1	15	0.9375	0.0500938
chr10:103716353-103772633	-	chr10:103716353	16	2	1	0.0625	0.00333959
chr10:103734968-103750368	-	chr10:103734968	6	1	3	0.5	0.0100188
chr10:103734968-103751795	-	chr10:103734968	6	2	2	0.333333	0.00667917
chr10:103734968-103755112	-	chr10:103734968	6	3	1	0.166667	0.00333959
chr10:103783233-103785005	-	chr10:103783233	14	1	6	0.428571	0.0200375
chr10:103783233-103799882	-	chr10:103783233	14	2	5	0.357143	0.0166979
chr10:103783233-103793096	-	chr10:103783233	14	3	3	0.214286	0.0100188
chr10:105197771-105198565	+	chr10:105198565	300	1	299	0.996667	0.998536
chr10:105187085-105198565	+	chr10:105198565	300	2	1	0.003333	0.00333959
chr10:1046616-1053068	+	chr10:1053068	16	1	11	0.6875	0.0367354
chr10:1044942-1053068	+	chr10:1053068	16	2	4	0.25	0.0133583
chr10:1041868-1053068	+	chr10:1053068	16	3	1	0.0625	0.00333959
chr10:1125950-1126416	+	chr10:1126416	72	1	56	0.777778	0.187017
chr10:1118055-1126416	+	chr10:1126416	72	2	16	0.222222	0.0534334
chr10:1118055-1132297	+	chr10:1132297	27	1	22	0.814815	0.0734709
chr10:1130342-1132297	+	chr10:1132297	27	2	4	0.148148	0.0133583
chr10:1126351-1132297	+	chr10:1132297	27	3	1	0.037037	0.00333959
chr10:1130342-1142186	+	chr10:1142186	84	1	68	0.809524	0.227092
chr10:1118055-1142186	+	chr10:1142186	84	2	14	0.166667	0.0467542
chr10:1139391-1142186	+	chr10:1142186	84	3	2	0.02381	0.00667917
chr10:114799783-114849299	+	chr10:114849299	39	1	32	0.820513	0.106867
chr10:114724314-114849299	+	chr10:114849299	39	2	7	0.179487	0.0233771
chr10:1130342-1151207	+	chr10:1151207	18	1	11	0.611111	0.0367354
chr10:1123846-1151207	+	chr10:1151207	18	2	3	0.166667	0.0100188
chr10:1149538-1151207	+	chr10:1151207	18	3	3	0.166667	0.0100188
chr10:1149541-1151207	+	chr10:1151207	18	4	1	0.055556	0.00333959
chr10:116225456-116227975	-	chr10:116225456	5	1	4	0.8	0.0133583
chr10:116225456-116233715	-	chr10:116225456	5	2	1	0.2	0.00333959
chr10:12006007-12021164	-	chr10:12006007	4	1	3	0.75	0.0100188
chr10:12006007-12056183	-	chr10:12006007	4	2	1	0.25	0.00333959
chr10:12039670-12056183	-	chr10:12039670	32	1	29	0.90625	0.096848
chr10:12039670-12042008	-	chr10:12039670	32	2	3	0.09375	0.0100188
chr10:120920426-120920593	-	chr10:120920426	17	1	9	0.529412	0.0300563
chr10:120920426-120921926	-	chr10:120920426	17	2	8	0.470588	0.0267167
chr10:12123470-12131254	+	chr10:12131254	12	1	9	0.75	0.0300563
chr10:12130984-12131254	+	chr10:12131254	12	2	3	0.25	0.0100188
chr10:12123470-12136270	+	chr10:12136270	52	1	50	0.961538	0.166979
chr10:12129533-12136270	+	chr10:12136270	52	2	2	0.038462	0.00667917
chr10:12126538-12150014	+	chr10:12150014	6	1	3	0.5	0.0100188
chr10:12148244-12150014	+	chr10:12150014	6	2	3	0.5	0.0100188
chr10:12123470-12155063	+	chr10:12155063	11	1	8	0.727273	0.0267167
chr10:12154898-12155063	+	chr10:12155063	11	2	3	0.272727	0.0100188
chr10:121541146-121571467	+	chr10:121571467	5	1	3	0.6	0.0100188
chr10:121556226-121571467	+	chr10:121571467	5	2	2	0.4	0.00667917
chr10:121596407-121612684	-	chr10:121596407	7	1	6	0.857143	0.0200375
chr10:121596407-121609088	-	chr10:121596407	7	2	1	0.142857	0.00333959
chr10:12123470-12162266	+	chr10:12162266	42	1	29	0.690476	0.096848
chr10:12136071-12162266	+	chr10:12162266	42	2	10	0.238095	0.0333959
chr10:12142176-12162266	+	chr10:12162266	42	3	2	0.047619	0.00667917
chr10:12159671-12162266	+	chr10:12162266	42	4	1	0.02381	0.00333959
chr10:123549683-123658484	-	chr10:123549683	12	1	5	0.416667	0.0166979
chr10:123549683-123683844	-	chr10:123549683	12	2	5	0.416667	0.0166979
chr10:123549683-123596332	-	chr10:123549683	12	3	2	0.166667	0.00667917
chr10:123658355-123683844	-	chr10:123658355	5	1	4	0.8	0.0133583
chr10:123658355-123662135	-	chr10:123658355	5	2	1	0.2	0.00333959
chr10:125798030-125804435	-	chr10:125798030	9	1	4	0.444444	0.0133583
chr10:125798030-125806240	-	chr10:125798030	9	2	4	0.444444	0.0133583
chr10:125798030-125801963	-	chr10:125798030	9	3	1	0.111111	0.00333959
chr10:126176990-126186697	+	chr10:126186697	23	1	16	0.695652	0.0534334
chr10:126185529-126186697	+	chr10:126186697	23	2	7	0.304348	0.0233771
chr10:126370175-126370948	-	chr10:126370175	97	1	66	0.680412	0.220413
chr10:126370175-126384781	-	chr10:126370175	97	2	16	0.164948	0.0534334
chr10:126370175-126395456	-	chr10:126370175	97	3	15	0.154639	0.0500938
chr10:126631025-126631876	+	chr10:126631876	41	1	36	0.878049	0.120225
chr10:126628942-126631876	+	chr10:126631876	41	2	5	0.121951	0.0166979
chr10:126727565-126776888	-	chr10:126727565	18	1	17	0.944444	0.056773
chr10:126727565-126727724	-	chr10:126727565	18	2	1	0.055556	0.00333959
chr10:127555558-127569640	-	chr10:127555558	6	1	3	0.5	0.0100188
chr10:127555558-127574245	-	chr10:127555558	6	2	3	0.5	0.0100188
chr10:128768965-128798571	+	chr10:128798571	21	1	16	0.761905	0.0534334
chr10:128776211-128798571	+	chr10:128798571	21	2	4	0.190476	0.0133583
chr10:128785784-128798571	+	chr10:128798571	21	3	1	0.047619	0.00333959
chr10:128835982-128841428	+	chr10:128841428	4	1	2	0.5	0.00667917
chr10:128810558-128841428	+	chr10:128841428	4	2	1	0.25	0.00333959
chr10:128829913-128841428	+	chr10:128841428	4	3	1	0.25	0.00333959
chr10:128850944-128860040	+	chr10:128860040	22	1	14	0.636364	0.0467542
chr10:128840888-128860040	+	chr10:128860040	22	2	6	0.272727	0.0200375
chr10:128824615-128860040	+	chr10:128860040	22	3	2	0.090909	0.00667917
chr10:128859931-128908618	+	chr10:128908618	31	1	18	0.580645	0.0601125
chr10:128904494-128908618	+	chr10:128908618	31	2	13	0.419355	0.0434146
chr10:128923737-128926028	+	chr10:128926028	21	1	13	0.619048	0.0434146
chr10:128859931-128926028	+	chr10:128926028	21	2	8	0.380952	0.0267167
chr10:13214375-13214765	+	chr10:13214765	18	1	14	0.777778	0.0467542
chr10:13206127-13214765	+	chr10:13214765	18	2	4	0.222222	0.0133583
chr10:13214375-13231080	+	chr10:13231080	4	1	2	0.5	0.00667917
chr10:13217509-13231080	+	chr10:13231080	4	2	2	0.5	0.00667917
chr10:15875628-15889942	-	chr10:15875628	10	1	9	0.9	0.0300563
chr10:15875628-15876615	-	chr10:15875628	10	2	1	0.1	0.00333959
chr10:21962278-22002879	+	chr10:22002879	26	1	13	0.5	0.0434146
chr10:21970260-22002879	+	chr10:22002879	26	2	7	0.269231	0.0233771
chr10:22002700-22002879	+	chr10:22002879	26	3	6	0.230769	0.0200375
chr10:24908401-24910298	-	chr10:24908401	4	1	2	0.5	0.00667917
chr10:24908401-24918979	-	chr10:24908401	4	2	2	0.5	0.00667917
chr10:225933-267296	+	chr10:267296	17	1	12	0.705882	0.040075
chr10:255828-267296	+	chr10:267296	17	2	3	0.176471	0.0100188
chr10:264394-267296	+	chr10:267296	17	3	2	0.117647	0.00667917
chr10:27349273-27355477	-	chr10:27349273	3	1	2	0.666667	0.00667917
chr10:27349273-27350171	-	chr10:27349273	3	2	1	0.333333	0.00333959
chr10:27458872-27462188	+	chr10:27462188	18	1	16	0.888889	0.0534334
chr10:27456030-27462188	+	chr10:27462188	18	2	2	0.111111	0.00667917
chr10:28872327-28879761	+	chr10:28879761	3	1	2	0.666667	0.00667917
chr10:28824490-28879761	+	chr10:28879761	3	2	1	0.333333	0.00333959
chr10:28872327-28884970	+	chr10:28884970	4	1	3	0.75	0.0100188
chr10:28884661-28884970	+	chr10:28884970	4	2	1	0.25	0.00333959
chr10:31661946-31676727	+	chr10:31676727	5	1	3	0.6	0.0100188
chr10:31644072-31676727	+	chr10:31676727	5	2	2	0.4	0.00667917
chr10:3174571-3175506	+	chr10:3175506	5	1	4	0.8	0.0133583
chr10:3160973-3175506	+	chr10:3175506	5	2	1	0.2	0.00333959
chr10:33542955-33552801	-	chr10:33542955	8	1	4	0.5	0.0133583
chr10:33542955-33559784	-	chr10:33542955	8	2	4	0.5	0.0133583
chr10:34558584-34573173	-	chr10:34558584	25	1	12	0.48	0.040075
chr10:34558584-34637043	-	chr10:34558584	25	2	5	0.2	0.0166979
chr10:34558584-34630744	-	chr10:34558584	25	3	4	0.16	0.0133583
chr10:34558584-34558827	-	chr10:34558584	25	4	2	0.08	0.00667917
chr10:34558584-34620272	-	chr10:34558584	25	5	1	0.04	0.00333959
chr10:34558584-34649187	-	chr10:34558584	25	6	1	0.04	0.00333959
chr10:34606034-34690845	-	chr10:34606034	6	1	2	0.333333	0.00667917
chr10:34606034-34637043	-	chr10:34606034	6	2	1	0.166667	0.00333959
chr10:34606034-34649187	-	chr10:34606034	6	3	1	0.166667	0.00333959
chr10:34606034-34673182	-	chr10:34606034	6	4	1	0.166667	0.00333959
chr10:34606034-34806087	-	chr10:34606034	6	5	1	0.166667	0.00333959
chr10:34620044-34649187	-	chr10:34620044	62	1	37	0.596774	0.123565
chr10:34620044-34630744	-	chr10:34620044	62	2	22	0.354839	0.0734709
chr10:34620044-34667034	-	chr10:34620044	62	3	2	0.032258	0.00667917
chr10:34620044-34673182	-	chr10:34620044	62	4	1	0.016129	0.00333959
chr10:34636892-34673182	-	chr10:34636892	17	1	9	0.529412	0.0300563
chr10:34636892-34649187	-	chr10:34636892	17	2	8	0.470588	0.0267167
chr10:34648074-34649187	-	chr10:34648074	14	1	8	0.571429	0.0267167
chr10:34648074-34673182	-	chr10:34648074	14	2	6	0.428571	0.0200375
chr10:34739244-34806087	-	chr10:34739244	7	1	5	0.714286	0.0166979
chr10:34739244-34759191	-	chr10:34739244	7	2	2	0.285714	0.00667917
chr10:35321362-35322201	-	chr10:35321362	21	1	18	0.857143	0.0601125
chr10:35321362-35338693	-	chr10:35321362	21	2	3	0.142857	0.0100188
chr10:355970-387269	-	chr10:355970	14	1	12	0.857143	0.040075
chr10:355970-375541	-	chr10:355970	14	2	1	0.071429	0.00333959
chr10:355970-395394	-	chr10:355970	14	3	1	0.071429	0.00333959
chr10:35790428-35805551	+	chr10:35805551	6	1	4	0.666667	0.0133583
chr10:35772331-35805551	+	chr10:35805551	6	2	2	0.333333	0.00667917
chr10:35805450-35819171	+	chr10:35819171	53	1	50	0.943396	0.166979
chr10:35814891-35819171	+	chr10:35819171	53	2	3	0.056604	0.0100188
chr10:35805450-35842113	+	chr10:35842113	7	1	4	0.571429	0.0133583
chr10:35818900-35842113	+	chr10:35842113	7	2	3	0.428571	0.0100188
chr10:412214-430086	-	chr10:412214	14	1	13	0.928571	0.0434146
chr10:412214-415573	-	chr10:412214	14	2	1	0.071429	0.00333959
chr10:486810-532470	-	chr10:486810	6	1	5	0.833333	0.0166979
chr10:486810-518489	-	chr10:486810	6	2	1	0.166667	0.00333959
chr10:4872866-4950612	+	chr10:4950612	63	1	56	0.888889	0.187017
chr10:4932063-4950612	+	chr10:4950612	63	2	7	0.111111	0.0233771
chr10:4872866-4951798	+	chr10:4951798	73	1	64	0.876712	0.213733
chr10:4950542-4951798	+	chr10:4951798	73	2	9	0.123288	0.0300563
chr10:4872866-4975522	+	chr10:4975522	30	1	25	0.833333	0.0834896
chr10:4950542-4975522	+	chr10:4975522	30	2	4	0.133333	0.0133583
chr10:4975428-4975522	+	chr10:4975522	30	3	1	0.033333	0.00333959
chr10:4872866-5014941	+	chr10:5014941	4	1	2	0.5	0.00667917
chr10:5014392-5014941	+	chr10:5014941	4	2	2	0.5	0.00667917
chr10:5040816-5049698	-	chr10:5040816	4	1	3	0.75	0.0100188
chr10:5040816-5040939	-	chr10:5040816	4	2	1	0.25	0.00333959
chr10:51374369-51387763	+	chr10:51387763	12	1	9	0.75	0.0300563
chr10:51381438-51387763	+	chr10:51387763	12	2	2	0.166667	0.00667917
chr10:51387652-51387763	+	chr10:51387763	12	3	1	0.083333	0.00333959
chr10:51606987-51620382	-	chr10:51606987	12	1	9	0.75	0.0300563
chr10:51606987-51613311	-	chr10:51606987	12	2	3	0.25	0.0100188
chr10:5762506-5769086	+	chr10:5769086	8	1	6	0.75	0.0200375
chr10:5759621-5769086	+	chr10:5769086	8	2	2	0.25	0.00667917
chr10:6264817-6265983	+	chr10:6265983	6	1	5	0.833333	0.0166979
chr10:6255585-6265983	+	chr10:6265983	6	2	1	0.166667	0.00333959
chr10:69714351-69773943	-	chr10:69714351	32	1	29	0.90625	0.096848
chr10:69714351-69748592	-	chr10:69714351	32	2	3	0.09375	0.0100188
chr10:69726439-69773943	-	chr10:69726439	36	1	19	0.527778	0.0634521
chr10:69726439-69804320	-	chr10:69726439	36	2	13	0.361111	0.0434146
chr10:69726439-69785433	-	chr10:69726439	36	3	4	0.111111	0.0133583
chr10:69747799-69773943	-	chr10:69747799	5	1	4	0.8	0.0133583
chr10:69747799-69804320	-	chr10:69747799	5	2	1	0.2	0.00333959
chr10:69748419-69773943	-	chr10:69748419	8	1	7	0.875	0.0233771
chr10:69748419-69750956	-	chr10:69748419	8	2	1	0.125	0.00333959
chr10:69785302-69804320	-	chr10:69785302	52	1	47	0.903846	0.156961
chr10:69785302-69826974	-	chr10:69785302	52	2	5	0.096154	0.0166979
chr10:70218860-70229920	-	chr10:70218860	10	1	8	0.8	0.0267167
chr10:70218860-70231642	-	chr10:70218860	10	2	2	0.2	0.00667917
chr10:70246900-70253327	-	chr10:70246900	14	1	7	0.5	0.0233771
chr10:70246900-70263452	-	chr10:70246900	14	2	3	0.214286	0.0100188
chr10:70246900-70276942	-	chr10:70246900	14	3	3	0.214286	0.0100188
chr10:70246900-70277022	-	chr10:70246900	14	4	1	0.071429	0.00333959
chr10:70507130-70509442	+	chr10:70509442	2	1	1	0.5	0.00333959
chr10:70508892-70509442	+	chr10:70509442	2	2	1	0.5	0.00333959
chr10:71243446-71258152	+	chr10:71258152	31	1	29	0.935484	0.096848
chr10:71255349-71258152	+	chr10:71258152	31	2	2	0.064516	0.00667917
chr10:71912018-71921687	-	chr10:71912018	19	1	14	0.736842	0.0467542
chr10:71912018-71920825	-	chr10:71912018	19	2	5	0.263158	0.0166979
chr10:7285519-7327916	-	chr10:7285519	56	1	52	0.928571	0.173658
chr10:7285519-7290611	-	chr10:7285519	56	2	2	0.035714	0.00667917
chr10:7285519-7318951	-	chr10:7285519	56	3	2	0.035714	0.00667917
chr10:7290509-7327916	-	chr10:7290509	2	1	1	0.5	0.00333959
chr10:7290509-7423911	-	chr10:7290509	2	2	1	0.5	0.00333959
chr10:7318853-7327916	-	chr10:7318853	74	1	72	0.972973	0.24045
chr10:7318853-7423911	-	chr10:7318853	74	2	2	0.027027	0.00667917
chr10:73956568-73956747	-	chr10:73956568	12	1	6	0.5	0.0200375
chr10:73956568-73973089	-	chr10:73956568	12	2	4	0.333333	0.0133583
chr10:73956568-73963282	-	chr10:73956568	12	3	2	0.166667	0.00667917
chr10:74474868-74475660	+	chr10:74475660	1345	1	1267	0.942007	4.23125
chr10:74468040-74475660	+	chr10:74475660	1345	2	78	0.057993	0.260488
chr10:74934444-74953351	+	chr10:74953351	2	1	1	0.5	0.00333959
chr10:74952313-74953351	+	chr10:74953351	2	2	1	0.5	0.00333959
chr10:74934444-74970196	+	chr10:74970196	2	1	1	0.5	0.00333959
chr10:74970008-74970196	+	chr10:74970196	2	2	1	0.5	0.00333959
chr10:75331178-75336119	-	chr10:75331178	7	1	6	0.857143	0.0200375
chr10:75331178-75335433	-	chr10:75331178	7	2	1	0.142857	0.00333959
chr10:75848953-75854219	+	chr10:75854219	3	1	2	0.666667	0.00667917
chr10:75854028-75854219	+	chr10:75854219	3	2	1	0.333333	0.00333959
chr10:76153898-76158337	+	chr10:76158337	5	1	4	0.8	0.0133583
chr10:76074424-76158337	+	chr10:76158337	5	2	1	0.2	0.00333959
chr10:76349039-76360251	+	chr10:76360251	4	1	3	0.75	0.0100188
chr10:76360136-76360251	+	chr10:76360251	4	2	1	0.25	0.00333959
chr10:76598440-76603236	+	chr10:76603236	9	1	7	0.777778	0.0233771
chr10:76602357-76603236	+	chr10:76603236	9	2	2	0.222222	0.00667917
chr10:7839009-7844817	+	chr10:7844817	110	1	107	0.972727	0.357336
chr10:7844232-7844817	+	chr10:7844817	110	2	2	0.018182	0.00667917
chr10:7840952-7844817	+	chr10:7844817	110	3	1	0.009091	0.00333959
chr10:79613111-79614128	-	chr10:79613111	26	1	21	0.807692	0.0701313
chr10:79613111-79628955	-	chr10:79613111	26	2	5	0.192308	0.0166979
chr10:79761954-79777474	-	chr10:79761954	9	1	5	0.555556	0.0166979
chr10:79761954-79767624	-	chr10:79761954	9	2	4	0.444444	0.0133583
chr10:80961340-80976031	+	chr10:80976031	30	1	17	0.566667	0.056773
chr10:80878671-80976031	+	chr10:80976031	30	2	12	0.4	0.040075
chr10:80870194-80976031	+	chr10:80976031	30	3	1	0.033333	0.00333959
chr10:82228302-82249070	+	chr10:82249070	36	1	23	0.638889	0.0768105
chr10:82222843-82249070	+	chr10:82249070	36	2	13	0.361111	0.0434146
chr10:86177526-86185649	+	chr10:86185649	109	1	107	0.981651	0.357336
chr10:86130769-86185649	+	chr10:86185649	109	2	2	0.018349	0.00667917
chr10:86177526-86237420	+	chr10:86237420	12	1	6	0.5	0.0200375
chr10:86198267-86237420	+	chr10:86237420	12	2	5	0.416667	0.0166979
chr10:86223688-86237420	+	chr10:86237420	12	3	1	0.083333	0.00333959
chr10:875324-890995	-	chr10:875324	26	1	11	0.423077	0.0367354
chr10:875324-931700	-	chr10:875324	26	2	7	0.269231	0.0233771
chr10:875324-875534	-	chr10:875324	26	3	5	0.192308	0.0166979
chr10:875324-910210	-	chr10:875324	26	4	3	0.115385	0.0100188
chr10:88203031-88233730	-	chr10:88203031	7	1	6	0.857143	0.0200375
chr10:88203031-88206206	-	chr10:88203031	7	2	1	0.142857	0.00333959
chr10:88211723-88221044	-	chr10:88211723	10	1	5	0.5	0.0166979
chr10:88211723-88233730	-	chr10:88211723	10	2	5	0.5	0.0166979
chr10:909682-931700	-	chr10:909682	56	1	37	0.660714	0.123565
chr10:909682-910210	-	chr10:909682	56	2	19	0.339286	0.0634521
chr10:93608139-93611093	+	chr10:93611093	21	1	20	0.952381	0.0667917
chr10:93609268-93611093	+	chr10:93611093	21	2	1	0.047619	0.00333959
chr10:93699708-93702325	+	chr10:93702325	3	1	2	0.666667	0.00667917
chr10:93695413-93702325	+	chr10:93702325	3	2	1	0.333333	0.00333959
chr10:93756125-93757508	+	chr10:93757508	16	1	12	0.75	0.040075
chr10:93754291-93757508	+	chr10:93757508	16	2	4	0.25	0.0133583
chr10:94215332-94228747	-	chr10:94215332	5	1	4	0.8	0.0133583
chr10:94215332-94216188	-	chr10:94215332	5	2	1	0.2	0.00333959
chr10:94708030-94757372	+	chr10:94757372	5	1	3	0.6	0.0100188
chr10:94688095-94757372	+	chr10:94757372	5	2	1	0.2	0.00333959
chr10:94693900-94757372	+	chr10:94757372	5	3	1	0.2	0.00333959
chr10:95155898-95159252	-	chr10:95155898	4	1	3	0.75	0.0100188
chr10:95155898-95191273	-	chr10:95155898	4	2	1	0.25	0.00333959
chr10:96018556-96018907	+	chr10:96018907	56	1	54	0.964286	0.180338
chr10:96018770-96018907	+	chr10:96018907	56	2	2	0.035714	0.00667917
chr10:96234424-96253204	+	chr10:96253204	5	1	3	0.6	0.0100188
chr10:96201652-96253204	+	chr10:96253204	5	2	2	0.4	0.00667917
chr10:98303832-98325183	-	chr10:98303832	26	1	23	0.884615	0.0768105
chr10:98303832-98336586	-	chr10:98303832	26	2	3	0.115385	0.0100188
chr10:98703869-98711953	+	chr10:98711953	15	1	11	0.733333	0.0367354
chr10:98667021-98711953	+	chr10:98711953	15	2	2	0.133333	0.00667917
chr10:98708764-98711953	+	chr10:98711953	15	3	2	0.133333	0.00667917
chr10:99150179-99150601	-	chr10:99150179	26	1	22	0.846154	0.0734709
chr10:99150179-99153517	-	chr10:99150179	26	2	4	0.153846	0.0133583
chr10:99236439-99238146	-	chr10:99236439	14	1	13	0.928571	0.0434146
chr10:99236439-99240799	-	chr10:99236439	14	2	1	0.071429	0.00333959
chr1:101372407-101387397	+	chr1:101387397	11	1	7	0.636364	0.0233771
chr1:101379218-101387397	+	chr1:101387397	11	2	3	0.272727	0.0100188
chr1:101377667-101387397	+	chr1:101387397	11	3	1	0.090909	0.00333959
chr1:109883345-109888503	-	chr1:109883345	3	1	2	0.666667	0.00667917
chr1:109883345-109888500	-	chr1:109883345	3	2	1	0.333333	0.00333959
chr11:102056748-102080295	+	chr11:102080295	14	1	9	0.642857	0.0300563
chr11:102076623-102080295	+	chr11:102080295	14	2	5	0.357143	0.0166979
chr11:103182606-103194718	+	chr11:103194718	7	1	4	0.571429	0.0133583
chr11:103187273-103194718	+	chr11:103194718	7	2	2	0.285714	0.00667917
chr11:103029405-103194718	+	chr11:103194718	7	3	1	0.142857	0.00333959
chr11:107673726-107677602	-	chr11:107673726	10	1	6	0.6	0.0200375
chr11:107673726-107676241	-	chr11:107673726	10	2	2	0.2	0.00667917
chr11:107673726-107686691	-	chr11:107673726	10	3	2	0.2	0.00667917
chr11:108559662-108594189	+	chr11:108594189	3	1	2	0.666667	0.00667917
chr11:108586605-108594189	+	chr11:108594189	3	2	1	0.333333	0.00333959
chr11:111715323-111735974	-	chr11:111715323	3	1	2	0.666667	0.00667917
chr11:111715323-111728460	-	chr11:111715323	3	2	1	0.333333	0.00333959
chr1:11133990-11137005	-	chr1:11133990	6	1	4	0.666667	0.0133583
chr1:11133990-11134383	-	chr1:11133990	6	2	2	0.333333	0.00667917
chr11:117023156-117034608	+	chr11:117034608	22	1	19	0.863636	0.0634521
chr11:117030649-117034608	+	chr11:117034608	22	2	3	0.136364	0.0100188
chr11:119002244-119003929	+	chr11:119003929	37	1	36	0.972973	0.120225
chr11:119003573-119003929	+	chr11:119003929	37	2	1	0.027027	0.00333959
chr11:119142444-119145663	+	chr11:119145663	4	1	2	0.5	0.00667917
chr11:119144577-119145663	+	chr11:119145663	4	2	2	0.5	0.00667917
chr11:120347369-120348235	+	chr11:120348235	16	1	10	0.625	0.0333959
chr11:120343758-120348235	+	chr11:120348235	16	2	2	0.125	0.00667917
chr11:120346048-120348235	+	chr11:120348235	16	3	2	0.125	0.00667917
chr11:120291461-120348235	+	chr11:120348235	16	4	1	0.0625	0.00333959
chr11:120310837-120348235	+	chr11:120348235	16	5	1	0.0625	0.00333959
chr11:12183625-12183966	+	chr11:12183966	6	1	4	0.666667	0.0133583
chr11:12159936-12183966	+	chr11:12183966	6	2	2	0.333333	0.00667917
chr11:122646926-122660016	+	chr11:122660016	4	1	3	0.75	0.0100188
chr11:122650204-122660016	+	chr11:122660016	4	2	1	0.25	0.00333959
chr11:122665409-122669742	+	chr11:122669742	7	1	4	0.571429	0.0133583
chr11:122646926-122669742	+	chr11:122669742	7	2	3	0.428571	0.0100188
chr11:122665409-122672040	+	chr11:122672040	9	1	4	0.444444	0.0133583
chr11:122653760-122672040	+	chr11:122672040	9	2	3	0.333333	0.0100188
chr11:122659807-122672040	+	chr11:122672040	9	3	1	0.111111	0.00333959
chr11:122666863-122672040	+	chr11:122672040	9	4	1	0.111111	0.00333959
chr11:125848198-125848278	-	chr11:125848198	6	1	3	0.5	0.0100188
chr11:125848198-125864947	-	chr11:125848198	6	2	3	0.5	0.0100188
chr11:128932174-128994789	-	chr11:128932174	3	1	2	0.666667	0.00667917
chr11:128932174-128936763	-	chr11:128932174	3	2	1	0.333333	0.00333959
chr11:128993340-128994789	-	chr11:128993340	32	1	27	0.84375	0.0901688
chr11:128993340-129034322	-	chr11:128993340	32	2	5	0.15625	0.0166979
chr11:1307231-1317024	-	chr11:1307231	41	1	33	0.804878	0.110206
chr11:1307231-1311639	-	chr11:1307231	41	2	8	0.195122	0.0267167
chr1:113153462-113153625	-	chr1:113153462	2	1	1	0.5	0.00333959
chr1:113153462-113159517	-	chr1:113153462	2	2	1	0.5	0.00333959
chr1:113196219-113202401	+	chr1:113202401	19	1	15	0.789474	0.0500938
chr1:113192039-113202401	+	chr1:113202401	19	2	4	0.210526	0.0133583
chr11:13435076-13443385	-	chr11:13435076	28	1	14	0.5	0.0467542
chr11:13435076-13466728	-	chr11:13435076	28	2	14	0.5	0.0467542
chr1:113655100-113662145	+	chr1:113662145	11	1	9	0.818182	0.0300563
chr1:113633939-113662145	+	chr1:113662145	11	2	2	0.181818	0.00667917
chr1:115005725-115007010	-	chr1:115005725	20	1	18	0.9	0.0601125
chr1:115005725-115006178	-	chr1:115005725	20	2	2	0.1	0.00667917
chr11:16863093-16892729	-	chr11:16863093	6	1	5	0.833333	0.0166979
chr11:16863093-16877461	-	chr11:16863093	6	2	1	0.166667	0.00333959
chr1:117944807-117963271	+	chr1:117963271	49	1	46	0.938776	0.153621
chr1:117957334-117963271	+	chr1:117963271	49	2	3	0.061224	0.0100188
chr1:117984852-118009049	+	chr1:118009049	2	1	1	0.5	0.00333959
chr1:118003110-118009049	+	chr1:118009049	2	2	1	0.5	0.00333959
chr11:18361110-18363154	+	chr11:18363154	4	1	3	0.75	0.0100188
chr11:18359655-18363154	+	chr11:18363154	4	2	1	0.25	0.00333959
chr1:118454615-118461358	-	chr1:118454615	8	1	5	0.625	0.0166979
chr1:118454615-118454704	-	chr1:118454615	8	2	3	0.375	0.0100188
chr11:18528403-18531212	-	chr11:18528403	13	1	12	0.923077	0.040075
chr11:18528403-18541150	-	chr11:18528403	13	2	1	0.076923	0.00333959
chr11:18536224-18541150	-	chr11:18536224	22	1	14	0.636364	0.0467542
chr11:18536224-18537711	-	chr11:18536224	22	2	8	0.363636	0.0267167
chr11:18579774-18591924	-	chr11:18579774	2	1	1	0.5	0.00333959
chr11:18579774-18596959	-	chr11:18579774	2	2	1	0.5	0.00333959
chr1:1192371-1192690	-	chr1:1192371	29	1	14	0.482759	0.0467542
chr1:1192371-1203372	-	chr1:1192371	29	2	10	0.344828	0.0333959
chr1:1192371-1198766	-	chr1:1192371	29	3	5	0.172414	0.0166979
chr11:20083852-20104725	+	chr11:20104725	5	1	4	0.8	0.0133583
chr11:20075625-20104725	+	chr11:20104725	5	2	1	0.2	0.00333959
chr1:12632755-12639440	-	chr1:12632755	8	1	6	0.75	0.0200375
chr1:12632755-12640694	-	chr1:12632755	8	2	2	0.25	0.00667917
chr1:12638745-12639440	-	chr1:12638745	122	1	117	0.959016	0.390731
chr1:12638745-12640694	-	chr1:12638745	122	2	5	0.040984	0.0166979
chr11:27395097-27395593	-	chr11:27395097	4	1	3	0.75	0.0100188
chr11:27395097-27434407	-	chr11:27395097	4	2	1	0.25	0.00333959
chr11:28056933-28058211	-	chr11:28056933	9	1	5	0.555556	0.0166979
chr11:28056933-28084063	-	chr11:28056933	9	2	4	0.444444	0.0133583
chr11:28080472-28113060	-	chr11:28080472	14	1	6	0.428571	0.0200375
chr11:28080472-28084063	-	chr11:28080472	14	2	5	0.357143	0.0166979
chr11:28080472-28090970	-	chr11:28080472	14	3	3	0.214286	0.0100188
chr11:28232608-28318478	+	chr11:28318478	14	1	9	0.642857	0.0300563
chr11:28250417-28318478	+	chr11:28318478	14	2	4	0.285714	0.0133583
chr11:28311752-28318478	+	chr11:28318478	14	3	1	0.071429	0.00333959
chr11:32610139-32610681	+	chr11:32610681	3	1	2	0.666667	0.00667917
chr11:32608557-32610681	+	chr11:32610681	3	2	1	0.333333	0.00333959
chr11:33350055-33363232	+	chr11:33363232	3	1	1	0.333333	0.00333959
chr11:33360302-33363232	+	chr11:33363232	3	2	1	0.333333	0.00333959
chr11:33362513-33363232	+	chr11:33363232	3	3	1	0.333333	0.00333959
chr11:34107610-34107960	+	chr11:34107960	22	1	15	0.681818	0.0500938
chr11:34101174-34107960	+	chr11:34107960	22	2	5	0.227273	0.0166979
chr11:34107851-34107960	+	chr11:34107960	22	3	2	0.090909	0.00667917
chr11:34129757-34140050	+	chr11:34140050	6	1	3	0.5	0.0100188
chr11:34139726-34140050	+	chr11:34140050	6	2	3	0.5	0.0100188
chr11:34175811-34176316	-	chr11:34175811	10	1	7	0.7	0.0233771
chr11:34175811-34192618	-	chr11:34175811	10	2	3	0.3	0.0100188
chr11:34978930-34999729	+	chr11:34999729	10	1	8	0.8	0.0267167
chr11:34952950-34999729	+	chr11:34999729	10	2	2	0.2	0.00667917
chr11:34991685-35006275	+	chr11:35006275	15	1	9	0.6	0.0300563
chr11:34952950-35006275	+	chr11:35006275	15	2	3	0.2	0.0100188
chr11:34978930-35006275	+	chr11:35006275	15	3	3	0.2	0.0100188
chr11:35208378-35211612	+	chr11:35211612	6	1	5	0.833333	0.0166979
chr11:35198121-35211612	+	chr11:35211612	6	2	1	0.166667	0.00333959
chr11:35236398-35243279	+	chr11:35243279	6	1	4	0.666667	0.0133583
chr11:35208378-35243279	+	chr11:35243279	6	2	1	0.166667	0.00333959
chr11:35240886-35243279	+	chr11:35243279	6	3	1	0.166667	0.00333959
chr11:3697738-3716836	-	chr11:3697738	8	1	5	0.625	0.0166979
chr11:3697738-3714605	-	chr11:3697738	8	2	3	0.375	0.0100188
chr11:3712576-3714605	-	chr11:3712576	15	1	12	0.8	0.040075
chr11:3712576-3712719	-	chr11:3712576	15	2	1	0.066667	0.00333959
chr11:3712576-3716836	-	chr11:3712576	15	3	1	0.066667	0.00333959
chr11:3712576-3746449	-	chr11:3712576	15	4	1	0.066667	0.00333959
chr11:3723692-3726586	-	chr11:3723692	3	1	2	0.666667	0.00667917
chr11:3723692-3774638	-	chr11:3723692	3	2	1	0.333333	0.00333959
chr11:3752620-3774638	-	chr11:3752620	69	1	39	0.565217	0.130244
chr11:3752620-3752808	-	chr11:3752620	69	2	19	0.275362	0.0634521
chr11:3752620-3756554	-	chr11:3752620	69	3	11	0.15942	0.0367354
chr11:3784131-3789974	-	chr11:3784131	18	1	10	0.555556	0.0333959
chr11:3784131-3797251	-	chr11:3784131	18	2	6	0.333333	0.0200375
chr11:3784131-3803375	-	chr11:3784131	18	3	2	0.111111	0.00667917
chr11:3789810-3789974	-	chr11:3789810	110	1	79	0.718182	0.263827
chr11:3789810-3797251	-	chr11:3789810	110	2	29	0.263636	0.096848
chr11:3789810-3793158	-	chr11:3789810	110	3	2	0.018182	0.00667917
chr11:3797111-3797251	-	chr11:3797111	3	1	2	0.666667	0.00667917
chr11:3797111-3803375	-	chr11:3797111	3	2	1	0.333333	0.00333959
chr1:14057494-14068652	+	chr1:14068652	21	1	17	0.809524	0.056773
chr1:14042035-14068652	+	chr1:14068652	21	2	4	0.190476	0.0133583
chr1:14042035-14075982	+	chr1:14075982	3	1	2	0.666667	0.00667917
chr1:14057494-14075982	+	chr1:14075982	3	2	1	0.333333	0.00333959
chr11:4123222-4133292	+	chr11:4133292	6	1	4	0.666667	0.0133583
chr11:4128664-4133292	+	chr11:4133292	6	2	2	0.333333	0.00667917
chr11:43413014-43429127	+	chr11:43429127	5	1	3	0.6	0.0100188
chr11:43421437-43429127	+	chr11:43429127	5	2	1	0.2	0.00333959
chr11:43425547-43429127	+	chr11:43429127	5	3	1	0.2	0.00333959
chr11:43425547-43472815	+	chr11:43472815	2	1	1	0.5	0.00333959
chr11:43471631-43472815	+	chr11:43472815	2	2	1	0.5	0.00333959
chr11:43852525-43861614	+	chr11:43861614	63	1	55	0.873016	0.183677
chr11:43859866-43861614	+	chr11:43861614	63	2	8	0.126984	0.0267167
chr11:44129232-44193292	+	chr11:44193292	13	1	11	0.846154	0.0367354
chr11:44193160-44193292	+	chr11:44193292	13	2	2	0.153846	0.00667917
chr1:145683574-145687091	+	chr1:145687091	3	1	2	0.666667	0.00667917
chr1:145646114-145687091	+	chr1:145687091	3	2	1	0.333333	0.00333959
chr1:145769407-145771730	-	chr1:145769407	8	1	6	0.75	0.0200375
chr1:145769407-145791170	-	chr1:145769407	8	2	1	0.125	0.00333959
chr1:145769407-145803388	-	chr1:145769407	8	3	1	0.125	0.00333959
chr11:46098304-46113774	-	chr11:46098304	13	1	11	0.846154	0.0367354
chr11:46098304-46140351	-	chr11:46098304	13	2	2	0.153846	0.00667917
chr11:46455023-46456587	-	chr11:46455023	16	1	14	0.875	0.0467542
chr11:46455023-46515754	-	chr11:46455023	16	2	2	0.125	0.00667917
chr11:46515157-46529920	-	chr11:46515157	276	1	134	0.485507	0.447504
chr11:46515157-46515754	-	chr11:46515157	276	2	74	0.268116	0.247129
chr11:46515157-46534363	-	chr11:46515157	276	3	54	0.195652	0.180338
chr11:46515157-46570050	-	chr11:46515157	276	4	14	0.050725	0.0467542
chr11:46529740-46534363	-	chr11:46529740	13	1	7	0.538462	0.0233771
chr11:46529740-46529920	-	chr11:46529740	13	2	6	0.461538	0.0200375
chr11:47505004-47506075	-	chr11:47505004	15	1	13	0.866667	0.0434146
chr11:47505004-47510576	-	chr11:47505004	15	2	2	0.133333	0.00667917
chr11:47644252-47647293	-	chr11:47644252	7	1	6	0.857143	0.0200375
chr11:47644252-47648679	-	chr11:47644252	7	2	1	0.142857	0.00333959
chr11:47647225-47648679	-	chr11:47647225	9	1	6	0.666667	0.0200375
chr11:47647225-47653263	-	chr11:47647225	9	2	3	0.333333	0.0100188
chr11:47684577-47726280	-	chr11:47684577	3	1	2	0.666667	0.00667917
chr11:47684577-47721105	-	chr11:47684577	3	2	1	0.333333	0.00333959
chr11:47745579-47755681	-	chr11:47745579	6	1	3	0.5	0.0100188
chr11:47745579-47786914	-	chr11:47745579	6	2	2	0.333333	0.00667917
chr11:47745579-47774654	-	chr11:47745579	6	3	1	0.166667	0.00333959
chr11:47804624-47808106	-	chr11:47804624	3	1	2	0.666667	0.00667917
chr11:47804624-47806615	-	chr11:47804624	3	2	1	0.333333	0.00333959
chr11:47823362-47830081	-	chr11:47823362	5	1	3	0.6	0.0100188
chr11:47823362-47823482	-	chr11:47823362	5	2	2	0.4	0.00667917
chr1:150390071-150418877	+	chr1:150418877	2	1	1	0.5	0.00333959
chr1:150418701-150418877	+	chr1:150418877	2	2	1	0.5	0.00333959
chr1:150999708-151001420	+	chr1:151001420	31	1	26	0.83871	0.0868292
chr1:150997086-151001420	+	chr1:151001420	31	2	5	0.16129	0.0166979
chr1:151060665-151079698	+	chr1:151079698	12	1	9	0.75	0.0300563
chr1:151070327-151079698	+	chr1:151079698	12	2	3	0.25	0.0100188
chr1:151196720-151205179	+	chr1:151205179	7	1	4	0.571429	0.0133583
chr1:151199795-151205179	+	chr1:151205179	7	2	3	0.428571	0.0100188
chr1:151395872-151403317	-	chr1:151395872	24	1	14	0.583333	0.0467542
chr1:151395872-151414681	-	chr1:151395872	24	2	10	0.416667	0.0333959
chr1:151611363-151641111	+	chr1:151641111	38	1	27	0.710526	0.0901688
chr1:151630710-151641111	+	chr1:151641111	38	2	11	0.289474	0.0367354
chr1:151611363-151655921	+	chr1:151655921	8	1	7	0.875	0.0233771
chr1:151630710-151655921	+	chr1:151655921	8	2	1	0.125	0.00333959
chr1:152287381-152307915	+	chr1:152307915	24	1	23	0.958333	0.0768105
chr1:152305058-152307915	+	chr1:152307915	24	2	1	0.041667	0.00333959
chr1:153637695-153641033	-	chr1:153637695	9	1	8	0.888889	0.0267167
chr1:153637695-153638204	-	chr1:153637695	9	2	1	0.111111	0.00333959
chr1:153723570-153730239	+	chr1:153730239	39	1	28	0.717949	0.0935084
chr1:153727117-153730239	+	chr1:153730239	39	2	10	0.25641	0.0333959
chr1:153701028-153730239	+	chr1:153730239	39	3	1	0.025641	0.00333959
chr1:153734045-153737539	+	chr1:153737539	13	1	8	0.615385	0.0267167
chr1:153732001-153737539	+	chr1:153737539	13	2	5	0.384615	0.0166979
chr1:154221714-154224129	+	chr1:154224129	25	1	11	0.44	0.0367354
chr1:154223516-154224129	+	chr1:154224129	25	2	11	0.44	0.0367354
chr1:154218679-154224129	+	chr1:154224129	25	3	3	0.12	0.0100188
chr1:154223516-154229910	+	chr1:154229910	7	1	6	0.857143	0.0200375
chr1:154221714-154229910	+	chr1:154229910	7	2	1	0.142857	0.00333959
chr1:155385534-155429689	-	chr1:155385534	12	1	8	0.666667	0.0267167
chr1:155385534-155385714	-	chr1:155385534	12	2	3	0.25	0.0100188
chr1:155385534-155408859	-	chr1:155385534	12	3	1	0.083333	0.00333959
chr1:155447676-155491409	-	chr1:155447676	15	1	8	0.533333	0.0267167
chr1:155447676-155452240	-	chr1:155447676	15	2	7	0.466667	0.0233771
chr1:155874101-155874595	-	chr1:155874101	14	1	10	0.714286	0.0333959
chr1:155874101-155880297	-	chr1:155874101	14	2	4	0.285714	0.0133583
chr1:155891165-155891709	-	chr1:155891165	94	1	67	0.712766	0.223752
chr1:155891165-155893478	-	chr1:155891165	94	2	21	0.223404	0.0701313
chr1:155891165-155895634	-	chr1:155891165	94	3	6	0.06383	0.0200375
chr1:156286956-156287338	-	chr1:156286956	49	1	45	0.918367	0.150281
chr1:156286956-156305679	-	chr1:156286956	49	2	4	0.081633	0.0133583
chr1:156288658-156305679	-	chr1:156288658	5	1	4	0.8	0.0133583
chr1:156288658-156290816	-	chr1:156288658	5	2	1	0.2	0.00333959
chr1:156294762-156303434	-	chr1:156294762	5	1	2	0.4	0.00667917
chr1:156294762-156304709	-	chr1:156294762	5	2	2	0.4	0.00667917
chr1:156294762-156294880	-	chr1:156294762	5	3	1	0.2	0.00333959
chr1:156937778-156955965	-	chr1:156937778	5	1	3	0.6	0.0100188
chr1:156937778-156939835	-	chr1:156937778	5	2	2	0.4	0.00667917
chr11:58317258-58338186	-	chr11:58317258	6	1	4	0.666667	0.0133583
chr11:58317258-58318705	-	chr11:58317258	6	2	1	0.166667	0.00333959
chr11:58317258-58322413	-	chr11:58317258	6	3	1	0.166667	0.00333959
chr1:15860731-15874923	+	chr1:15874923	4	1	3	0.75	0.0100188
chr1:15855582-15874923	+	chr1:15874923	4	2	1	0.25	0.00333959
chr1:15964801-15970145	+	chr1:15970145	29	1	20	0.689655	0.0667917
chr1:15956819-15970145	+	chr1:15970145	29	2	6	0.206897	0.0200375
chr1:15953163-15970145	+	chr1:15970145	29	3	3	0.103448	0.0100188
chr1:160201086-160231148	-	chr1:160201086	7	1	4	0.571429	0.0133583
chr1:160201086-160207019	-	chr1:160201086	7	2	3	0.428571	0.0100188
chr1:160281657-160282957	-	chr1:160281657	21	1	20	0.952381	0.0667917
chr1:160281657-160293320	-	chr1:160281657	21	2	1	0.047619	0.00333959
chr1:16046228-16047883	+	chr1:16047883	21	1	11	0.52381	0.0367354
chr1:16044387-16047883	+	chr1:16047883	21	2	10	0.47619	0.0333959
chr11:61089066-61090566	-	chr11:61089066	6	1	4	0.666667	0.0133583
chr11:61089066-61094365	-	chr11:61089066	6	2	1	0.166667	0.00333959
chr11:61089066-61097546	-	chr11:61089066	6	3	1	0.166667	0.00333959
chr11:61133516-61135470	+	chr11:61135470	68	1	63	0.926471	0.210394
chr11:61133589-61135470	+	chr11:61135470	68	2	5	0.073529	0.0166979
chr11:61183137-61183991	-	chr11:61183137	5	1	2	0.4	0.00667917
chr11:61183137-61189080	-	chr11:61183137	5	2	2	0.4	0.00667917
chr11:61183137-61196762	-	chr11:61183137	5	3	1	0.2	0.00333959
chr11:61624482-61632749	+	chr11:61632749	4	1	2	0.5	0.00667917
chr11:61630443-61632749	+	chr11:61632749	4	2	2	0.5	0.00667917
chr1:161722864-161723051	+	chr1:161723051	3	1	2	0.666667	0.00667917
chr1:161722157-161723051	+	chr1:161723051	3	2	1	0.333333	0.00333959
chr1:161816238-161833102	+	chr1:161833102	8	1	7	0.875	0.0233771
chr1:161751701-161833102	+	chr1:161833102	8	2	1	0.125	0.00333959
chr1:16235815-16242774	+	chr1:16242774	6	1	4	0.666667	0.0133583
chr1:16237595-16242774	+	chr1:16242774	6	2	2	0.333333	0.00667917
chr11:62650379-62653080	+	chr11:62653080	21	1	16	0.761905	0.0534334
chr11:62652648-62653080	+	chr11:62653080	21	2	5	0.238095	0.0166979
chr11:63719709-63720311	+	chr11:63720311	5	1	3	0.6	0.0100188
chr11:63719878-63720311	+	chr11:63720311	5	2	2	0.4	0.00667917
chr11:65061623-65063461	+	chr11:65063461	32	1	20	0.625	0.0667917
chr11:65055186-65063461	+	chr11:65063461	32	2	12	0.375	0.040075
chr11:65373231-65375919	-	chr11:65373231	4	1	3	0.75	0.0100188
chr11:65373231-65373323	-	chr11:65373231	4	2	1	0.25	0.00333959
chr11:65977832-65978730	+	chr11:65978730	20	1	11	0.55	0.0367354
chr11:65960956-65978730	+	chr11:65978730	20	2	9	0.45	0.0300563
chr1:16621277-16632414	-	chr1:16621277	10	1	8	0.8	0.0267167
chr1:16621277-16641930	-	chr1:16621277	10	2	2	0.2	0.00667917
chr11:66589113-66590145	+	chr11:66590145	33	1	24	0.727273	0.08015
chr11:66583523-66590145	+	chr11:66590145	33	2	4	0.121212	0.0133583
chr11:66571465-66590145	+	chr11:66590145	33	3	3	0.090909	0.0100188
chr11:66555630-66590145	+	chr11:66590145	33	4	2	0.060606	0.00667917
chr11:66589113-66595835	+	chr11:66595835	76	1	33	0.434211	0.110206
chr11:66583523-66595835	+	chr11:66595835	76	2	21	0.276316	0.0701313
chr11:66571465-66595835	+	chr11:66595835	76	3	13	0.171053	0.0434146
chr11:66526513-66595835	+	chr11:66595835	76	4	5	0.065789	0.0166979
chr11:66568111-66595835	+	chr11:66595835	76	5	2	0.026316	0.00667917
chr11:66515849-66595835	+	chr11:66595835	76	6	1	0.013158	0.00333959
chr11:66571468-66595835	+	chr11:66595835	76	7	1	0.013158	0.00333959
chr11:66974980-66975159	+	chr11:66975159	15	1	9	0.6	0.0300563
chr11:66947549-66975159	+	chr11:66975159	15	2	6	0.4	0.0200375
chr1:167734819-167745403	+	chr1:167745403	8	1	7	0.875	0.0233771
chr1:167741511-167745403	+	chr1:167745403	8	2	1	0.125	0.00333959
chr11:67761146-67765269	-	chr11:67761146	5	1	4	0.8	0.0133583
chr11:67761146-67770645	-	chr11:67761146	5	2	1	0.2	0.00333959
chr1:167935866-167944253	+	chr1:167944253	20	1	18	0.9	0.0601125
chr1:167921037-167944253	+	chr1:167944253	20	2	2	0.1	0.00667917
chr1:168007608-168014465	+	chr1:168014465	17	1	11	0.647059	0.0367354
chr1:167988782-168014465	+	chr1:168014465	17	2	3	0.176471	0.0100188
chr1:167992225-168014465	+	chr1:168014465	17	3	3	0.176471	0.0100188
chr11:68125117-68133170	+	chr11:68133170	15	1	8	0.533333	0.0267167
chr11:68115314-68133170	+	chr11:68133170	15	2	7	0.466667	0.0233771
chr11:68190956-68193655	+	chr11:68193655	11	1	8	0.727273	0.0267167
chr11:68170950-68193655	+	chr11:68193655	11	2	3	0.272727	0.0100188
chr11:68286968-68315672	+	chr11:68315672	8	1	7	0.875	0.0233771
chr11:68305126-68315672	+	chr11:68315672	8	2	1	0.125	0.00333959
chr11:68272612-68363686	+	chr11:68363686	5	1	3	0.6	0.0100188
chr11:68350510-68363686	+	chr11:68363686	5	2	2	0.4	0.00667917
chr11:68369330-68370960	+	chr11:68370960	7	1	4	0.571429	0.0133583
chr11:68363564-68370960	+	chr11:68370960	7	2	2	0.285714	0.00667917
chr11:68350510-68370960	+	chr11:68370960	7	3	1	0.142857	0.00333959
chr11:68571467-68575106	-	chr11:68571467	58	1	51	0.87931	0.170319
chr11:68571467-68580044	-	chr11:68571467	58	2	7	0.12069	0.0233771
chr11:70189774-70194526	+	chr11:70194526	40	1	20	0.5	0.0667917
chr11:70176278-70194526	+	chr11:70194526	40	2	13	0.325	0.0434146
chr11:70118278-70194526	+	chr11:70194526	40	3	5	0.125	0.0166979
chr11:70170507-70194526	+	chr11:70194526	40	4	2	0.05	0.00667917
chr11:70218320-70224301	+	chr11:70224301	10	1	9	0.9	0.0300563
chr11:70118278-70224301	+	chr11:70224301	10	2	1	0.1	0.00333959
chr11:70505932-70507783	-	chr11:70505932	35	1	34	0.971429	0.113546
chr11:70505932-70653276	-	chr11:70505932	35	2	1	0.028571	0.00333959
chr11:70820986-70830078	-	chr11:70820986	9	1	5	0.555556	0.0166979
chr11:70820986-70858384	-	chr11:70820986	9	2	2	0.222222	0.00667917
chr11:70820986-70935842	-	chr11:70820986	9	3	2	0.222222	0.00667917
chr1:171492359-171496983	+	chr1:171496983	15	1	13	0.866667	0.0434146
chr1:171493959-171496983	+	chr1:171496983	15	2	2	0.133333	0.00667917
chr11:71668272-71671937	+	chr11:71671937	81	1	47	0.580247	0.156961
chr11:71671795-71671937	+	chr11:71671937	81	2	34	0.419753	0.113546
chr1:1720491-1749314	-	chr1:1720491	11	1	10	0.909091	0.0333959
chr1:1720491-1722035	-	chr1:1720491	11	2	1	0.090909	0.00333959
chr1:1721833-1724750	-	chr1:1721833	19	1	13	0.684211	0.0434146
chr1:1721833-1722035	-	chr1:1721833	19	2	6	0.315789	0.0200375
chr11:72420914-72422544	-	chr11:72420914	22	1	17	0.772727	0.056773
chr11:72420914-72421021	-	chr11:72420914	22	2	5	0.227273	0.0166979
chr1:172520651-172548407	+	chr1:172548407	3	1	2	0.666667	0.00667917
chr1:172525008-172548407	+	chr1:172548407	3	2	1	0.333333	0.00333959
chr11:72695132-72696161	-	chr11:72695132	3	1	2	0.666667	0.00667917
chr11:72695132-72700142	-	chr11:72695132	3	2	1	0.333333	0.00333959
chr11:73418464-73429763	-	chr11:73418464	23	1	9	0.391304	0.0300563
chr11:73418464-73429935	-	chr11:73418464	23	2	7	0.304348	0.0233771
chr11:73418464-73441868	-	chr11:73418464	23	3	5	0.217391	0.0166979
chr11:73418464-73431944	-	chr11:73418464	23	4	2	0.086957	0.00667917
chr1:1735857-1737977	-	chr1:1735857	357	1	275	0.770308	0.918386
chr1:1735857-1749314	-	chr1:1735857	357	2	39	0.109244	0.130244
chr1:1735857-1770677	-	chr1:1735857	357	3	19	0.053221	0.0634521
chr1:1735857-1747301	-	chr1:1735857	357	4	11	0.030812	0.0367354
chr1:1735857-1756938	-	chr1:1735857	357	5	7	0.019608	0.0233771
chr1:1735857-1811341	-	chr1:1735857	357	6	6	0.016807	0.0200375
chr11:73785297-73796931	-	chr11:73785297	2	1	1	0.5	0.00333959
chr11:73785297-73850873	-	chr11:73785297	2	2	1	0.5	0.00333959
chr1:1737913-1749314	-	chr1:1737913	13	1	11	0.846154	0.0367354
chr1:1737913-1770677	-	chr1:1737913	13	2	2	0.153846	0.00667917
chr11:73843888-73844602	-	chr11:73843888	30	1	15	0.5	0.0500938
chr11:73843888-73850873	-	chr11:73843888	30	2	13	0.433333	0.0434146
chr11:73843888-73872601	-	chr11:73843888	30	3	2	0.066667	0.00667917
chr11:73996853-73997436	-	chr11:73996853	2	1	1	0.5	0.00333959
chr11:73996853-74015457	-	chr11:73996853	2	2	1	0.5	0.00333959
chr1:174241551-174363283	+	chr1:174363283	7	1	4	0.571429	0.0133583
chr1:174363132-174363283	+	chr1:174363283	7	2	3	0.428571	0.0100188
chr11:74500670-74528759	+	chr11:74528759	20	1	19	0.95	0.0634521
chr11:74521228-74528759	+	chr11:74528759	20	2	1	0.05	0.00333959
chr1:174652659-174671394	+	chr1:174671394	2	1	1	0.5	0.00333959
chr1:174668662-174671394	+	chr1:174671394	2	2	1	0.5	0.00333959
chr1:1747194-1756938	-	chr1:1747194	119	1	66	0.554622	0.220413
chr1:1747194-1770677	-	chr1:1747194	119	2	48	0.403361	0.1603
chr1:1747194-1749314	-	chr1:1747194	119	3	5	0.042017	0.0166979
chr1:175956078-175996824	-	chr1:175956078	6	1	5	0.833333	0.0166979
chr1:175956078-175958615	-	chr1:175956078	6	2	1	0.166667	0.00333959
chr1:176050287-176055026	-	chr1:176050287	21	1	8	0.380952	0.0267167
chr1:176050287-176105683	-	chr1:176050287	21	2	8	0.380952	0.0267167
chr1:176050287-176118210	-	chr1:176050287	21	3	3	0.142857	0.0100188
chr1:176050287-176085817	-	chr1:176050287	21	4	2	0.095238	0.00667917
chr11:76224429-76227356	+	chr11:76227356	5	1	4	0.8	0.0133583
chr11:76207258-76227356	+	chr11:76227356	5	2	1	0.2	0.00333959
chr11:76224429-76239510	+	chr11:76239510	11	1	8	0.727273	0.0267167
chr11:76237505-76239510	+	chr11:76239510	11	2	2	0.181818	0.00667917
chr11:76207258-76239510	+	chr11:76239510	11	3	1	0.090909	0.00333959
chr11:76670022-76709865	+	chr11:76709865	21	1	10	0.47619	0.0333959
chr11:76696686-76709865	+	chr11:76709865	21	2	9	0.428571	0.0300563
chr11:76701582-76709865	+	chr11:76709865	21	3	2	0.095238	0.00667917
chr11:77330650-77336863	-	chr11:77330650	18	1	11	0.611111	0.0367354
chr11:77330650-77340944	-	chr11:77330650	18	2	7	0.388889	0.0233771
chr11:77336007-77336863	-	chr11:77336007	23	1	13	0.565217	0.0434146
chr11:77336007-77340944	-	chr11:77336007	23	2	10	0.434783	0.0333959
chr11:77402203-77404656	-	chr11:77402203	40	1	36	0.9	0.120225
chr11:77402203-77413540	-	chr11:77402203	40	2	4	0.1	0.0133583
chr11:77815025-77820627	-	chr11:77815025	12	1	6	0.5	0.0200375
chr11:77815025-77815499	-	chr11:77815025	12	2	3	0.25	0.0100188
chr11:77815025-77832220	-	chr11:77815025	12	3	2	0.166667	0.00667917
chr11:77815025-77835260	-	chr11:77815025	12	4	1	0.083333	0.00333959
chr11:77823695-77838482	-	chr11:77823695	4	1	3	0.75	0.0100188
chr11:77823695-77825438	-	chr11:77823695	4	2	1	0.25	0.00333959
chr11:77824931-77825438	-	chr11:77824931	3	1	2	0.666667	0.00667917
chr11:77824931-77832220	-	chr11:77824931	3	2	1	0.333333	0.00333959
chr11:77830227-77832220	-	chr11:77830227	13	1	6	0.461538	0.0200375
chr11:77830227-77838482	-	chr11:77830227	13	2	6	0.461538	0.0200375
chr11:77830227-77835260	-	chr11:77830227	13	3	1	0.076923	0.00333959
chr11:78176921-78204241	-	chr11:78176921	22	1	16	0.727273	0.0534334
chr11:78176921-78180359	-	chr11:78176921	22	2	5	0.227273	0.0166979
chr11:78176921-78282489	-	chr11:78176921	22	3	1	0.045455	0.00333959
chr11:78180292-78204241	-	chr11:78180292	6	1	4	0.666667	0.0133583
chr11:78180292-78282489	-	chr11:78180292	6	2	2	0.333333	0.00667917
chr1:179081443-179091002	-	chr1:179081443	14	1	12	0.857143	0.040075
chr1:179081443-179081533	-	chr1:179081443	14	2	2	0.142857	0.00667917
chr1:179100445-179102509	-	chr1:179100445	79	1	71	0.898734	0.237111
chr1:179100445-179100616	-	chr1:179100445	79	2	8	0.101266	0.0267167
chr1:179310162-179312078	+	chr1:179312078	10	1	7	0.7	0.0233771
chr1:179306971-179312078	+	chr1:179312078	10	2	3	0.3	0.0100188
chr1:179304640-179312770	+	chr1:179312770	3	1	2	0.666667	0.00667917
chr1:179311144-179312770	+	chr1:179312770	3	2	1	0.333333	0.00333959
chr1:179316734-179319566	+	chr1:179319566	22	1	18	0.818182	0.0601125
chr1:179310162-179319566	+	chr1:179319566	22	2	3	0.136364	0.0100188
chr1:179306971-179319566	+	chr1:179319566	22	3	1	0.045455	0.00333959
chr1:179972308-179993717	+	chr1:179993717	3	1	2	0.666667	0.00667917
chr1:179989083-179993717	+	chr1:179993717	3	2	1	0.333333	0.00333959
chr1:180366650-180382606	-	chr1:180366650	24	1	22	0.916667	0.0734709
chr1:180366650-180399397	-	chr1:180366650	24	2	2	0.083333	0.00667917
chr1:180772523-180780624	+	chr1:180780624	16	1	12	0.75	0.040075
chr1:180756888-180780624	+	chr1:180780624	16	2	4	0.25	0.0133583
chr1:180772523-180794480	+	chr1:180794480	8	1	6	0.75	0.0200375
chr1:180793888-180794480	+	chr1:180794480	8	2	2	0.25	0.00667917
chr1:180793888-180843078	+	chr1:180843078	3	1	2	0.666667	0.00667917
chr1:180804009-180843078	+	chr1:180843078	3	2	1	0.333333	0.00333959
chr1:180953812-180962561	-	chr1:180953812	55	1	38	0.690909	0.126904
chr1:180953812-180974599	-	chr1:180953812	55	2	15	0.272727	0.0500938
chr1:180953812-180957481	-	chr1:180953812	55	3	2	0.036364	0.00667917
chr11:85685750-85695016	-	chr11:85685750	104	1	58	0.557692	0.193696
chr11:85685750-85742653	-	chr11:85685750	104	2	30	0.288462	0.100188
chr11:85685750-85692271	-	chr11:85685750	104	3	10	0.096154	0.0333959
chr11:85685750-85714494	-	chr11:85685750	104	4	6	0.057692	0.0200375
chr11:85687665-85692271	-	chr11:85687665	9	1	6	0.666667	0.0200375
chr11:85687665-85695016	-	chr11:85687665	9	2	3	0.333333	0.0100188
chr11:85692787-85707972	-	chr11:85692787	71	1	39	0.549296	0.130244
chr11:85692787-85693046	-	chr11:85692787	71	2	20	0.28169	0.0667917
chr11:85692787-85693031	-	chr11:85692787	71	3	8	0.112676	0.0267167
chr11:85692787-85695016	-	chr11:85692787	71	4	4	0.056338	0.0133583
chr11:85701292-85742653	-	chr11:85701292	6	1	4	0.666667	0.0133583
chr11:85701292-85718626	-	chr11:85701292	6	2	2	0.333333	0.00667917
chr11:85707868-85742653	-	chr11:85707868	202	1	142	0.70297	0.474221
chr11:85707868-85714494	-	chr11:85707868	202	2	56	0.277228	0.187017
chr11:85707868-85718626	-	chr11:85707868	202	3	4	0.019802	0.0133583
chr11:85966263-85967554	+	chr11:85967554	13	1	7	0.538462	0.0233771
chr11:85961337-85967554	+	chr11:85967554	13	2	6	0.461538	0.0200375
chr1:186862142-186880521	+	chr1:186880521	6	1	5	0.833333	0.0166979
chr1:186880379-186880521	+	chr1:186880521	6	2	1	0.166667	0.00333959
chr1:19243396-19244996	-	chr1:19243396	3	1	2	0.666667	0.00667917
chr1:19243396-19247615	-	chr1:19243396	3	2	1	0.333333	0.00333959
chr1:193119433-193121574	+	chr1:193121574	8	1	5	0.625	0.0166979
chr1:193110979-193121574	+	chr1:193121574	8	2	3	0.375	0.0100188
chr11:9430032-9438695	+	chr11:9438695	2	1	1	0.5	0.00333959
chr11:9431474-9438695	+	chr11:9438695	2	2	1	0.5	0.00333959
chr11:9451220-9452550	+	chr11:9452550	11	1	10	0.909091	0.0333959
chr11:9444552-9452550	+	chr11:9452550	11	2	1	0.090909	0.00333959
chr11:94532555-94533477	+	chr11:94533477	25	1	13	0.52	0.0434146
chr11:94528176-94533477	+	chr11:94533477	25	2	12	0.48	0.040075
chr1:19510304-19511780	-	chr1:19510304	14	1	7	0.5	0.0233771
chr1:19510304-19514034	-	chr1:19510304	14	2	7	0.5	0.0233771
chr1:197086918-197104372	-	chr1:197086918	2	1	1	0.5	0.00333959
chr1:197086918-197109001	-	chr1:197086918	2	2	1	0.5	0.00333959
chr1:197552281-197586889	-	chr1:197552281	18	1	9	0.5	0.0300563
chr1:197552281-197614873	-	chr1:197552281	18	2	6	0.333333	0.0200375
chr1:197552281-197684204	-	chr1:197552281	18	3	2	0.111111	0.00667917
chr1:197552281-197643299	-	chr1:197552281	18	4	1	0.055556	0.00333959
chr1:197564337-197586889	-	chr1:197564337	7	1	5	0.714286	0.0166979
chr1:197564337-197684204	-	chr1:197564337	7	2	2	0.285714	0.00667917
chr1:197576202-197586889	-	chr1:197576202	5	1	4	0.8	0.0133583
chr1:197576202-197627499	-	chr1:197576202	5	2	1	0.2	0.00333959
chr1:197611840-197627499	-	chr1:197611840	19	1	15	0.789474	0.0500938
chr1:197611840-197643299	-	chr1:197611840	19	2	3	0.157895	0.0100188
chr1:197611840-197621445	-	chr1:197611840	19	3	1	0.052632	0.00333959
chr1:197621364-197627499	-	chr1:197621364	5	1	4	0.8	0.0133583
chr1:197621364-197684204	-	chr1:197621364	5	2	1	0.2	0.00333959
chr1:198247090-198266370	+	chr1:198266370	5	1	4	0.8	0.0133583
chr1:198201682-198266370	+	chr1:198266370	5	2	1	0.2	0.00333959
chr11:9983503-10024236	-	chr11:9983503	6	1	3	0.5	0.0100188
chr11:9983503-9985429	-	chr11:9983503	6	2	2	0.333333	0.00667917
chr11:9983503-10014090	-	chr11:9983503	6	3	1	0.166667	0.00333959
chr1:200550328-200575926	-	chr1:200550328	6	1	3	0.5	0.0100188
chr1:200550328-200561368	-	chr1:200550328	6	2	2	0.333333	0.00667917
chr1:200550328-200567549	-	chr1:200550328	6	3	1	0.166667	0.00333959
chr1:200776503-200784772	+	chr1:200784772	5	1	3	0.6	0.0100188
chr1:200729966-200784772	+	chr1:200784772	5	2	2	0.4	0.00667917
chr1:201779073-201786413	+	chr1:201786413	8	1	6	0.75	0.0200375
chr1:201786215-201786413	+	chr1:201786413	8	2	2	0.25	0.00667917
chr1:201821231-201826322	+	chr1:201826322	8	1	7	0.875	0.0233771
chr1:201817520-201826322	+	chr1:201826322	8	2	1	0.125	0.00333959
chr1:201821231-201828122	+	chr1:201828122	64	1	29	0.453125	0.096848
chr1:201826223-201828122	+	chr1:201828122	64	2	29	0.453125	0.096848
chr1:201816406-201828122	+	chr1:201828122	64	3	4	0.0625	0.0133583
chr1:201823722-201828122	+	chr1:201828122	64	4	2	0.03125	0.00667917
chr1:201966446-201966682	+	chr1:201966682	10	1	6	0.6	0.0200375
chr1:201958031-201966682	+	chr1:201966682	10	2	4	0.4	0.0133583
chr1:201965274-201973624	+	chr1:201973624	2	1	1	0.5	0.00333959
chr1:201969029-201973624	+	chr1:201973624	2	2	1	0.5	0.00333959
chr1:202396167-202418299	+	chr1:202418299	12	1	6	0.5	0.0200375
chr1:202385914-202418299	+	chr1:202418299	12	2	3	0.25	0.0100188
chr1:202400607-202418299	+	chr1:202418299	12	3	2	0.166667	0.00667917
chr1:202411574-202418299	+	chr1:202418299	12	4	1	0.083333	0.00333959
chr1:203807093-203809502	+	chr1:203809502	6	1	3	0.5	0.0100188
chr1:203802918-203809502	+	chr1:203809502	6	2	2	0.333333	0.00667917
chr1:203786053-203809502	+	chr1:203809502	6	3	1	0.166667	0.00333959
chr1:205585605-205593019	-	chr1:205585605	56	1	52	0.928571	0.173658
chr1:205585605-205588201	-	chr1:205585605	56	2	4	0.071429	0.0133583
chr1:2066700-2087531	+	chr1:2087531	3	1	2	0.666667	0.00667917
chr1:2080310-2087531	+	chr1:2087531	3	2	1	0.333333	0.00333959
chr12:104705067-104721449	+	chr12:104721449	36	1	14	0.388889	0.0467542
chr12:104719114-104721449	+	chr12:104721449	36	2	13	0.361111	0.0434146
chr12:104721292-104721449	+	chr12:104721449	36	3	5	0.138889	0.0166979
chr12:104712690-104721449	+	chr12:104721449	36	4	4	0.111111	0.0133583
chr12:104705067-104733051	+	chr12:104733051	28	1	14	0.5	0.0467542
chr12:104719114-104733051	+	chr12:104733051	28	2	8	0.285714	0.0267167
chr12:104732916-104733051	+	chr12:104733051	28	3	4	0.142857	0.0133583
chr12:104682708-104733051	+	chr12:104733051	28	4	2	0.071429	0.00667917
chr12:105321750-105322472	-	chr12:105321750	26	1	19	0.730769	0.0634521
chr12:105321750-105325569	-	chr12:105321750	26	2	7	0.269231	0.0233771
chr1:210577807-210591669	+	chr1:210591669	21	1	9	0.428571	0.0300563
chr1:210573811-210591669	+	chr1:210591669	21	2	8	0.380952	0.0267167
chr1:210522276-210591669	+	chr1:210591669	21	3	3	0.142857	0.0100188
chr1:210591497-210591669	+	chr1:210591669	21	4	1	0.047619	0.00333959
chr1:21076215-21100103	-	chr1:21076215	7	1	4	0.571429	0.0133583
chr1:21076215-21076375	-	chr1:21076215	7	2	3	0.428571	0.0100188
chr12:107914263-107937916	+	chr12:107937916	28	1	19	0.678571	0.0634521
chr12:107937711-107937916	+	chr12:107937916	28	2	9	0.321429	0.0300563
chr12:108006556-108013941	+	chr12:108013941	6	1	4	0.666667	0.0133583
chr12:107914263-108013941	+	chr12:108013941	6	2	2	0.333333	0.00667917
chr12:108136973-108140201	-	chr12:108136973	5	1	4	0.8	0.0133583
chr12:108136973-108138438	-	chr12:108136973	5	2	1	0.2	0.00333959
chr1:21083658-21107033	-	chr1:21083658	6	1	4	0.666667	0.0133583
chr1:21083658-21103243	-	chr1:21083658	6	2	2	0.333333	0.00667917
chr12:109046047-109048186	-	chr12:109046047	308	1	300	0.974026	1.00188
chr12:109046047-109095099	-	chr12:109046047	308	2	8	0.025974	0.0267167
chr12:109212024-109212334	-	chr12:109212024	42	1	20	0.47619	0.0667917
chr12:109212024-109217137	-	chr12:109212024	42	2	17	0.404762	0.056773
chr12:109212024-109246454	-	chr12:109212024	42	3	5	0.119048	0.0166979
chr1:210948689-210948886	-	chr1:210948689	2	1	1	0.5	0.00333959
chr1:210948689-210977508	-	chr1:210948689	2	2	1	0.5	0.00333959
chr12:109539706-109541416	+	chr12:109541416	19	1	16	0.842105	0.0534334
chr12:109540643-109541416	+	chr12:109541416	19	2	3	0.157895	0.0100188
chr12:109954569-109964221	+	chr12:109964221	3	1	2	0.666667	0.00667917
chr12:109919441-109964221	+	chr12:109964221	3	2	1	0.333333	0.00333959
chr12:110376184-110377052	-	chr12:110376184	4	1	2	0.5	0.00667917
chr12:110376184-110397763	-	chr12:110376184	4	2	1	0.25	0.00333959
chr12:110376184-110399490	-	chr12:110376184	4	3	1	0.25	0.00333959
chr12:110778463-110780253	+	chr12:110780253	39	1	29	0.74359	0.096848
chr12:110764194-110780253	+	chr12:110780253	39	2	10	0.25641	0.0333959
chr12:111057640-111070364	+	chr12:111070364	8	1	4	0.5	0.0133583
chr12:111064166-111070364	+	chr12:111070364	8	2	4	0.5	0.0133583
chr12:111907911-111924628	-	chr12:111907911	10	1	8	0.8	0.0267167
chr12:111907911-111926584	-	chr12:111907911	10	2	2	0.2	0.00667917
chr1:211192205-211192598	-	chr1:211192205	48	1	44	0.916667	0.146942
chr1:211192205-211256240	-	chr1:211192205	48	2	4	0.083333	0.0133583
chr12:111923068-111924628	-	chr12:111923068	21	1	19	0.904762	0.0634521
chr12:111923068-111993723	-	chr12:111923068	21	2	2	0.095238	0.00667917
chr12:111923074-111924628	-	chr12:111923074	44	1	41	0.931818	0.136923
chr12:111923074-111948386	-	chr12:111923074	44	2	2	0.045455	0.00667917
chr12:111923074-111957880	-	chr12:111923074	44	3	1	0.022727	0.00333959
chr12:111951160-111993723	-	chr12:111951160	27	1	16	0.592593	0.0534334
chr12:111951160-111957880	-	chr12:111951160	27	2	11	0.407407	0.0367354
chr12:111962995-111990781	-	chr12:111962995	6	1	3	0.5	0.0100188
chr12:111962995-111993723	-	chr12:111962995	6	2	3	0.5	0.0100188
chr12:111990083-111993723	-	chr12:111990083	35	1	30	0.857143	0.100188
chr12:111990083-111990781	-	chr12:111990083	35	2	5	0.142857	0.0166979
chr12:112171726-112171872	+	chr12:112171872	85	1	72	0.847059	0.24045
chr12:112167609-112171872	+	chr12:112171872	85	2	7	0.082353	0.0233771
chr12:112130500-112171872	+	chr12:112171872	85	3	3	0.035294	0.0100188
chr12:112153624-112171872	+	chr12:112171872	85	4	3	0.035294	0.0100188
chr12:112370389-112381173	-	chr12:112370389	14	1	13	0.928571	0.0434146
chr12:112370389-112429693	-	chr12:112370389	14	2	1	0.071429	0.00333959
chr1:211256121-211280719	-	chr1:211256121	7	1	6	0.857143	0.0200375
chr1:211256121-211264032	-	chr1:211256121	7	2	1	0.142857	0.00333959
chr12:112647818-112666615	-	chr12:112647818	3	1	2	0.666667	0.00667917
chr12:112647818-112657293	-	chr12:112647818	3	2	1	0.333333	0.00333959
chr12:112654095-112657293	-	chr12:112654095	9	1	8	0.888889	0.0267167
chr12:112654095-112654999	-	chr12:112654095	9	2	1	0.111111	0.00333959
chr12:112667501-112690332	-	chr12:112667501	6	1	3	0.5	0.0100188
chr12:112667501-112669519	-	chr12:112667501	6	2	2	0.333333	0.00667917
chr12:112667501-112688938	-	chr12:112667501	6	3	1	0.166667	0.00333959
chr12:112711458-112711599	-	chr12:112711458	2	1	1	0.5	0.00333959
chr12:112711458-112717190	-	chr12:112711458	2	2	1	0.5	0.00333959
chr12:116534473-116549317	-	chr12:116534473	24	1	19	0.791667	0.0634521
chr12:116534473-116675510	-	chr12:116534473	24	2	5	0.208333	0.0166979
chr1:21167348-21177971	-	chr1:21167348	2	1	1	0.5	0.00333959
chr1:21167348-21191755	-	chr1:21167348	2	2	1	0.5	0.00333959
chr12:117204618-117217153	+	chr12:117217153	21	1	20	0.952381	0.0667917
chr12:117187645-117217153	+	chr12:117217153	21	2	1	0.047619	0.00333959
chr12:117273764-117274087	+	chr12:117274087	50	1	30	0.6	0.100188
chr12:117271596-117274087	+	chr12:117274087	50	2	20	0.4	0.0667917
chr12:117365827-117387511	+	chr12:117387511	24	1	13	0.541667	0.0434146
chr12:117383168-117387511	+	chr12:117387511	24	2	11	0.458333	0.0367354
chr12:117365827-117402659	+	chr12:117402659	40	1	19	0.475	0.0634521
chr12:117402501-117402659	+	chr12:117402659	40	2	18	0.45	0.0601125
chr12:117383168-117402659	+	chr12:117402659	40	3	3	0.075	0.0100188
chr12:117402501-117426674	+	chr12:117426674	18	1	9	0.5	0.0300563
chr12:117365827-117426674	+	chr12:117426674	18	2	6	0.333333	0.0200375
chr12:117423010-117426674	+	chr12:117426674	18	3	3	0.166667	0.0100188
chr12:12022357-12022903	+	chr12:12022903	5	1	4	0.8	0.0133583
chr12:12006360-12022903	+	chr12:12022903	5	2	1	0.2	0.00333959
chr12:120260623-120272032	-	chr12:120260623	5	1	4	0.8	0.0133583
chr12:120260623-120288079	-	chr12:120260623	5	2	1	0.2	0.00333959
chr12:120612964-120614020	-	chr12:120612964	45	1	43	0.955556	0.143602
chr12:120612964-120628203	-	chr12:120612964	45	2	2	0.044444	0.00667917
chr12:120636920-120637008	-	chr12:120636920	7	1	5	0.714286	0.0166979
chr12:120636920-120637288	-	chr12:120636920	7	2	2	0.285714	0.00667917
chr12:120995084-120995485	+	chr12:120995485	46	1	45	0.978261	0.150281
chr12:120995348-120995485	+	chr12:120995485	46	2	1	0.021739	0.00333959
chr12:120992520-121001746	+	chr12:121001746	12	1	8	0.666667	0.0267167
chr12:121000747-121001746	+	chr12:121001746	12	2	4	0.333333	0.0133583
chr12:121002874-121004783	+	chr12:121004783	15	1	13	0.866667	0.0434146
chr12:120992520-121004783	+	chr12:121004783	15	2	2	0.133333	0.00667917
chr12:121004627-121009094	+	chr12:121009094	15	1	12	0.8	0.040075
chr12:120992520-121009094	+	chr12:121009094	15	2	3	0.2	0.0100188
chr12:121220457-121222396	-	chr12:121220457	346	1	319	0.921965	1.06533
chr12:121220457-121229360	-	chr12:121220457	346	2	17	0.049133	0.056773
chr12:121220457-121248689	-	chr12:121220457	346	3	10	0.028902	0.0333959
chr1:21220009-21221994	-	chr1:21220009	43	1	22	0.511628	0.0734709
chr1:21220009-21268823	-	chr1:21220009	43	2	11	0.255814	0.0367354
chr1:21220009-21231464	-	chr1:21220009	43	3	7	0.162791	0.0233771
chr1:21220009-21377487	-	chr1:21220009	43	4	3	0.069767	0.0100188
chr12:122181534-122190129	+	chr12:122190129	32	1	21	0.65625	0.0701313
chr12:122186231-122190129	+	chr12:122190129	32	2	11	0.34375	0.0367354
chr12:122181534-122199644	+	chr12:122199644	50	1	42	0.84	0.140263
chr12:122186231-122199644	+	chr12:122199644	50	2	8	0.16	0.0267167
chr12:122186231-122211419	+	chr12:122211419	3	1	2	0.666667	0.00667917
chr12:122181534-122211419	+	chr12:122211419	3	2	1	0.333333	0.00333959
chr12:122332644-122341013	+	chr12:122341013	20	1	18	0.9	0.0601125
chr12:122340911-122341013	+	chr12:122341013	20	2	2	0.1	0.00667917
chr12:1219357-1225199	+	chr12:1225199	13	1	7	0.538462	0.0233771
chr12:1192329-1225199	+	chr12:1225199	13	2	6	0.461538	0.0200375
chr12:12277498-12279855	-	chr12:12277498	3	1	2	0.666667	0.00667917
chr12:12277498-12283827	-	chr12:12277498	3	2	1	0.333333	0.00333959
chr12:12283716-12300490	-	chr12:12283716	17	1	11	0.647059	0.0367354
chr12:12283716-12288234	-	chr12:12283716	17	2	3	0.176471	0.0100188
chr12:12283716-12303972	-	chr12:12283716	17	3	3	0.176471	0.0100188
chr12:123028705-123032516	+	chr12:123032516	3	1	2	0.666667	0.00667917
chr12:123030722-123032516	+	chr12:123032516	3	2	1	0.333333	0.00333959
chr12:123068824-123069537	+	chr12:123069537	10	1	9	0.9	0.0300563
chr12:123067251-123069537	+	chr12:123069537	10	2	1	0.1	0.00333959
chr12:123041930-123076000	+	chr12:123076000	6	1	5	0.833333	0.0166979
chr12:123052807-123076000	+	chr12:123076000	6	2	1	0.166667	0.00333959
chr12:123068824-123103092	+	chr12:123103092	5	1	3	0.6	0.0100188
chr12:123102889-123103092	+	chr12:123103092	5	2	2	0.4	0.00667917
chr12:123060089-123109235	+	chr12:123109235	4	1	2	0.5	0.00667917
chr12:123078822-123109235	+	chr12:123109235	4	2	1	0.25	0.00333959
chr12:123102889-123109235	+	chr12:123109235	4	3	1	0.25	0.00333959
chr12:12332743-12340053	-	chr12:12332743	14	1	10	0.714286	0.0333959
chr12:12332743-12356334	-	chr12:12332743	14	2	4	0.285714	0.0133583
chr12:123419818-123425542	-	chr12:123419818	3	1	2	0.666667	0.00667917
chr12:123419818-123435112	-	chr12:123419818	3	2	1	0.333333	0.00333959
chr12:123983090-123984083	-	chr12:123983090	7	1	6	0.857143	0.0200375
chr12:123983090-124008192	-	chr12:123983090	7	2	1	0.142857	0.00333959
chr12:124102304-124103384	+	chr12:124103384	14	1	11	0.785714	0.0367354
chr12:124101057-124103384	+	chr12:124103384	14	2	3	0.214286	0.0100188
chr12:124904502-124922542	-	chr12:124904502	12	1	5	0.416667	0.0166979
chr12:124904502-124934413	-	chr12:124904502	12	2	4	0.333333	0.0133583
chr12:124904502-124915333	-	chr12:124904502	12	3	3	0.25	0.0100188
chr12:125284669-125292473	-	chr12:125284669	2	1	1	0.5	0.00333959
chr12:125284669-125294835	-	chr12:125284669	2	2	1	0.5	0.00333959
chr12:125292306-125302253	-	chr12:125292306	33	1	22	0.666667	0.0734709
chr12:125292306-125294835	-	chr12:125292306	33	2	11	0.333333	0.0367354
chr12:12653452-12653616	-	chr12:12653452	4	1	3	0.75	0.0100188
chr12:12653452-12707593	-	chr12:12653452	4	2	1	0.25	0.00333959
chr12:129293332-129299615	-	chr12:129293332	23	1	19	0.826087	0.0634521
chr12:129293332-129294018	-	chr12:129293332	23	2	4	0.173913	0.0133583
chr1:21295966-21307720	-	chr1:21295966	80	1	65	0.8125	0.217073
chr1:21295966-21329301	-	chr1:21295966	80	2	15	0.1875	0.0500938
chr1:21327691-21329301	-	chr1:21327691	38	1	34	0.894737	0.113546
chr1:21327691-21377487	-	chr1:21327691	38	2	4	0.105263	0.0133583
chr1:21329205-21415706	-	chr1:21329205	31	1	12	0.387097	0.040075
chr1:21329205-21437876	-	chr1:21329205	31	2	12	0.387097	0.040075
chr1:21329205-21377487	-	chr1:21329205	31	3	7	0.225806	0.0233771
chr12:133310970-133312098	-	chr12:133310970	4	1	3	0.75	0.0100188
chr12:133310970-133313651	-	chr12:133310970	4	2	1	0.25	0.00333959
chr12:133357383-133360893	-	chr12:133357383	11	1	6	0.545455	0.0200375
chr12:133357383-133398897	-	chr12:133357383	11	2	5	0.454545	0.0166979
chr12:133381301-133398897	-	chr12:133381301	11	1	10	0.909091	0.0333959
chr12:133381301-133393398	-	chr12:133381301	11	2	1	0.090909	0.00333959
chr1:213290658-213341316	+	chr1:213341316	2	1	1	0.5	0.00333959
chr1:213302869-213341316	+	chr1:213341316	2	2	1	0.5	0.00333959
chr12:133428203-133430159	-	chr12:133428203	6	1	4	0.666667	0.0133583
chr12:133428203-133434145	-	chr12:133428203	6	2	2	0.333333	0.00667917
chr1:213341200-213349835	+	chr1:213349835	30	1	25	0.833333	0.0834896
chr1:213302869-213349835	+	chr1:213349835	30	2	5	0.166667	0.0166979
chr1:213349742-213405598	+	chr1:213405598	2	1	1	0.5	0.00333959
chr1:213403839-213405598	+	chr1:213405598	2	2	1	0.5	0.00333959
chr1:21377358-21415706	-	chr1:21377358	100	1	63	0.63	0.210394
chr1:21377358-21437876	-	chr1:21377358	100	2	36	0.36	0.120225
chr1:21377358-21377487	-	chr1:21377358	100	3	1	0.01	0.00333959
chr12:1399017-1481143	+	chr12:1481143	6	1	5	0.833333	0.0166979
chr12:1372199-1481143	+	chr12:1481143	6	2	1	0.166667	0.00333959
chr12:1480998-1553916	+	chr12:1553916	14	1	7	0.5	0.0233771
chr12:1399017-1553916	+	chr12:1553916	14	2	6	0.428571	0.0200375
chr12:1553727-1553916	+	chr12:1553916	14	3	1	0.071429	0.00333959
chr1:21599191-21599404	-	chr1:21599191	6	1	3	0.5	0.0100188
chr1:21599191-21616649	-	chr1:21599191	6	2	3	0.5	0.0100188
chr12:19653030-19653155	+	chr12:19653155	17	1	7	0.411765	0.0233771
chr12:19626181-19653155	+	chr12:19653155	17	2	6	0.352941	0.0200375
chr12:19615443-19653155	+	chr12:19653155	17	3	4	0.235294	0.0133583
chr1:220276788-220311385	+	chr1:220311385	5	1	4	0.8	0.0133583
chr1:220298578-220311385	+	chr1:220311385	5	2	1	0.2	0.00333959
chr12:21196267-21229503	+	chr12:21229503	10	1	9	0.9	0.0300563
chr12:21013950-21229503	+	chr12:21229503	10	2	1	0.1	0.00333959
chr12:22635490-22659753	-	chr12:22635490	3	1	2	0.666667	0.00667917
chr12:22635490-22637822	-	chr12:22635490	3	2	1	0.333333	0.00333959
chr12:22637630-22659753	-	chr12:22637630	18	1	15	0.833333	0.0500938
chr12:22637630-22643152	-	chr12:22637630	18	2	2	0.111111	0.00667917
chr12:22637630-22646271	-	chr12:22637630	18	3	1	0.055556	0.00333959
chr1:222794500-222806591	+	chr1:222806591	2	1	1	0.5	0.00333959
chr1:222800916-222806591	+	chr1:222806591	2	2	1	0.5	0.00333959
chr12:22796696-22826594	+	chr12:22826594	15	1	8	0.533333	0.0267167
chr12:22811947-22826594	+	chr12:22826594	15	2	7	0.466667	0.0233771
chr1:224592131-224599267	-	chr1:224592131	4	1	2	0.5	0.00667917
chr1:224592131-224612356	-	chr1:224592131	4	2	2	0.5	0.00667917
chr12:26564252-26628351	-	chr12:26564252	3	1	2	0.666667	0.00667917
chr12:26564252-26808785	-	chr12:26564252	3	2	1	0.333333	0.00333959
chr1:227073238-227076750	+	chr1:227076750	38	1	20	0.526316	0.0667917
chr1:227075791-227076750	+	chr1:227076750	38	2	18	0.473684	0.0601125
chr12:27132716-27143560	-	chr12:27132716	8	1	5	0.625	0.0166979
chr12:27132716-27152609	-	chr12:27132716	8	2	3	0.375	0.0100188
chr12:27135705-27143560	-	chr12:27135705	8	1	4	0.5	0.0133583
chr12:27135705-27152609	-	chr12:27135705	8	2	4	0.5	0.0133583
chr12:27143382-27152609	-	chr12:27143382	19	1	12	0.631579	0.040075
chr12:27143382-27156323	-	chr12:27143382	19	2	5	0.263158	0.0166979
chr12:27143382-27152699	-	chr12:27143382	19	3	2	0.105263	0.00667917
chr12:27149674-27152609	-	chr12:27149674	17	1	16	0.941176	0.0534334
chr12:27149674-27152581	-	chr12:27149674	17	2	1	0.058824	0.00333959
chr1:227192694-227204751	-	chr1:227192694	6	1	4	0.666667	0.0133583
chr1:227192694-227213853	-	chr1:227192694	6	2	2	0.333333	0.00667917
chr12:27867712-27877119	+	chr12:27877119	21	1	12	0.571429	0.040075
chr12:27872740-27877119	+	chr12:27877119	21	2	9	0.428571	0.0300563
chr12:28378727-28412375	+	chr12:28412375	16	1	11	0.6875	0.0367354
chr12:28408513-28412375	+	chr12:28412375	16	2	5	0.3125	0.0166979
chr12:28458581-28515448	+	chr12:28515448	4	1	3	0.75	0.0100188
chr12:28457558-28515448	+	chr12:28515448	4	2	1	0.25	0.00333959
chr1:229602380-229623360	-	chr1:229602380	7	1	6	0.857143	0.0200375
chr1:229602380-229634053	-	chr1:229602380	7	2	1	0.142857	0.00333959
chr1:229622117-229634053	-	chr1:229622117	10	1	8	0.8	0.0267167
chr1:229622117-229623360	-	chr1:229622117	10	2	2	0.2	0.00667917
chr1:229625701-229634053	-	chr1:229625701	5	1	4	0.8	0.0133583
chr1:229625701-229631312	-	chr1:229625701	5	2	1	0.2	0.00333959
chr1:229657338-229685181	-	chr1:229657338	3	1	2	0.666667	0.00667917
chr1:229657338-229683448	-	chr1:229657338	3	2	1	0.333333	0.00333959
chr1:229665945-229678118	-	chr1:229665945	3	1	2	0.666667	0.00667917
chr1:229665945-229683448	-	chr1:229665945	3	2	1	0.333333	0.00333959
chr1:229768015-229790135	+	chr1:229790135	5	1	4	0.8	0.0133583
chr1:229779279-229790135	+	chr1:229790135	5	2	1	0.2	0.00333959
chr1:230390963-230401113	+	chr1:230401113	14	1	8	0.571429	0.0267167
chr1:230379051-230401113	+	chr1:230401113	14	2	6	0.428571	0.0200375
chr12:30818153-30819185	-	chr12:30818153	2	1	1	0.5	0.00333959
chr12:30818153-30837391	-	chr12:30818153	2	2	1	0.5	0.00333959
chr12:30826923-30837391	-	chr12:30826923	3	1	2	0.666667	0.00667917
chr12:30826923-30827687	-	chr12:30826923	3	2	1	0.333333	0.00333959
chr12:31545200-31545630	-	chr12:31545200	2	1	1	0.5	0.00333959
chr12:31545200-31562318	-	chr12:31545200	2	2	1	0.5	0.00333959
chr12:31555431-31595859	-	chr12:31555431	2	1	1	0.5	0.00333959
chr12:31555431-31600703	-	chr12:31555431	2	2	1	0.5	0.00333959
chr12:31566369-31586182	-	chr12:31566369	15	1	7	0.466667	0.0233771
chr12:31566369-31600703	-	chr12:31566369	15	2	6	0.4	0.0200375
chr12:31566369-31613315	-	chr12:31566369	15	3	2	0.133333	0.00667917
chr12:31576530-31579358	-	chr12:31576530	4	1	2	0.5	0.00667917
chr12:31576530-31595859	-	chr12:31576530	4	2	2	0.5	0.00667917
chr12:31586088-31595859	-	chr12:31586088	21	1	12	0.571429	0.040075
chr12:31586088-31600703	-	chr12:31586088	21	2	9	0.428571	0.0300563
chr12:31595708-31600703	-	chr12:31595708	13	1	12	0.923077	0.040075
chr12:31595708-31648853	-	chr12:31595708	13	2	1	0.076923	0.00333959
chr12:31600471-31613315	-	chr12:31600471	8	1	4	0.5	0.0133583
chr12:31600471-31652605	-	chr12:31600471	8	2	3	0.375	0.0100188
chr12:31600471-31605410	-	chr12:31600471	8	3	1	0.125	0.00333959
chr12:31604873-31648853	-	chr12:31604873	24	1	14	0.583333	0.0467542
chr12:31604873-31613315	-	chr12:31604873	24	2	8	0.333333	0.0267167
chr12:31604873-31652605	-	chr12:31604873	24	3	2	0.083333	0.00667917
chr12:31841940-31862359	-	chr12:31841940	3	1	2	0.666667	0.00667917
chr12:31841940-31842052	-	chr12:31841940	3	2	1	0.333333	0.00333959
chr1:232596632-232607274	-	chr1:232596632	16	1	11	0.6875	0.0367354
chr1:232596632-232615476	-	chr1:232596632	16	2	5	0.3125	0.0166979
chr1:232649602-232651354	-	chr1:232649602	17	1	13	0.764706	0.0434146
chr1:232649602-232669329	-	chr1:232649602	17	2	4	0.235294	0.0133583
chr12:32734893-32764217	+	chr12:32764217	3	1	1	0.333333	0.00333959
chr12:32751430-32764217	+	chr12:32764217	3	2	1	0.333333	0.00333959
chr12:32754211-32764217	+	chr12:32764217	3	3	1	0.333333	0.00333959
chr12:32866142-32871697	+	chr12:32871697	7	1	6	0.857143	0.0200375
chr12:32861086-32871697	+	chr12:32871697	7	2	1	0.142857	0.00333959
chr1:233190013-233231609	-	chr1:233190013	32	1	15	0.46875	0.0500938
chr1:233190013-233193036	-	chr1:233190013	32	2	14	0.4375	0.0467542
chr1:233190013-233363117	-	chr1:233190013	32	3	3	0.09375	0.0100188
chr1:233225806-233231609	-	chr1:233225806	262	1	254	0.969466	0.848255
chr1:233225806-233297109	-	chr1:233225806	262	2	8	0.030534	0.0267167
chr1:233248544-233297109	-	chr1:233248544	14	1	12	0.857143	0.040075
chr1:233248544-233314921	-	chr1:233248544	14	2	1	0.071429	0.00333959
chr1:233248544-233372726	-	chr1:233248544	14	3	1	0.071429	0.00333959
chr1:233270758-233297109	-	chr1:233270758	134	1	103	0.768657	0.343977
chr1:233270758-233314921	-	chr1:233270758	134	2	15	0.11194	0.0500938
chr1:233270758-233372726	-	chr1:233270758	134	3	9	0.067164	0.0300563
chr1:233270758-233344435	-	chr1:233270758	134	4	5	0.037313	0.0166979
chr1:233270758-233275601	-	chr1:233270758	134	5	2	0.014925	0.00667917
chr1:233296028-233344435	-	chr1:233296028	23	1	15	0.652174	0.0500938
chr1:233296028-233372726	-	chr1:233296028	23	2	4	0.173913	0.0133583
chr1:233296028-233336010	-	chr1:233296028	23	3	3	0.130435	0.0100188
chr1:233296028-233395090	-	chr1:233296028	23	4	1	0.043478	0.00333959
chr1:233313547-233344435	-	chr1:233313547	44	1	34	0.772727	0.113546
chr1:233313547-233372726	-	chr1:233313547	44	2	8	0.181818	0.0267167
chr1:233313547-233353930	-	chr1:233313547	44	3	2	0.045455	0.00667917
chr1:233334684-233344435	-	chr1:233334684	122	1	49	0.401639	0.16364
chr1:233334684-233372726	-	chr1:233334684	122	2	47	0.385246	0.156961
chr1:233334684-233388534	-	chr1:233334684	122	3	13	0.106557	0.0434146
chr1:233334684-233353930	-	chr1:233334684	122	4	6	0.04918	0.0200375
chr1:233334684-233395090	-	chr1:233334684	122	5	4	0.032787	0.0133583
chr1:233334684-233336010	-	chr1:233334684	122	6	2	0.016393	0.00667917
chr1:233334684-233344356	-	chr1:233334684	122	7	1	0.008197	0.00333959
chr1:233344263-233372726	-	chr1:233344263	16	1	15	0.9375	0.0500938
chr1:233344263-233353930	-	chr1:233344263	16	2	1	0.0625	0.00333959
chr1:233353644-233363117	-	chr1:233353644	77	1	47	0.61039	0.156961
chr1:233353644-233372726	-	chr1:233353644	77	2	30	0.38961	0.100188
chr1:233362971-233372726	-	chr1:233362971	20	1	16	0.8	0.0534334
chr1:233362971-233388534	-	chr1:233362971	20	2	3	0.15	0.0100188
chr1:233362971-233397067	-	chr1:233362971	20	3	1	0.05	0.00333959
chr1:23356961-23377013	+	chr1:23377013	15	1	11	0.733333	0.0367354
chr1:23370919-23377013	+	chr1:23377013	15	2	4	0.266667	0.0133583
chr1:23356961-23385660	+	chr1:23385660	27	1	15	0.555556	0.0500938
chr1:23376879-23385660	+	chr1:23385660	27	2	11	0.407407	0.0367354
chr1:23370919-23385660	+	chr1:23385660	27	3	1	0.037037	0.00333959
chr1:235582787-235597595	+	chr1:235597595	13	1	7	0.538462	0.0233771
chr1:235582731-235597595	+	chr1:235597595	13	2	5	0.384615	0.0166979
chr1:235590454-235597595	+	chr1:235597595	13	3	1	0.076923	0.00333959
chr1:235597518-235600789	+	chr1:235600789	7	1	6	0.857143	0.0200375
chr1:235577747-235600789	+	chr1:235600789	7	2	1	0.142857	0.00333959
chr1:235643369-235658138	-	chr1:235643369	43	1	40	0.930233	0.133583
chr1:235643369-235647831	-	chr1:235643369	43	2	3	0.069767	0.0100188
chr1:236969443-236979843	+	chr1:236979843	9	1	7	0.777778	0.0233771
chr1:236976037-236979843	+	chr1:236979843	9	2	2	0.222222	0.00667917
chr1:24075510-24079008	+	chr1:24079008	2	1	1	0.5	0.00333959
chr1:24077334-24079008	+	chr1:24079008	2	2	1	0.5	0.00333959
chr12:41374710-41423021	+	chr12:41423021	5	1	4	0.8	0.0133583
chr12:41333136-41423021	+	chr12:41423021	5	2	1	0.2	0.00333959
chr12:42604156-42604421	-	chr12:42604156	36	1	23	0.638889	0.0768105
chr12:42604156-42604482	-	chr12:42604156	36	2	12	0.333333	0.040075
chr12:42604156-42606286	-	chr12:42604156	36	3	1	0.027778	0.00333959
chr12:42778741-42781337	+	chr12:42781337	3	1	2	0.666667	0.00667917
chr12:42748962-42781337	+	chr12:42781337	3	2	1	0.333333	0.00333959
chr12:42768664-42792796	+	chr12:42792796	8	1	4	0.5	0.0133583
chr12:42745686-42792796	+	chr12:42792796	8	2	2	0.25	0.00667917
chr12:42748962-42792796	+	chr12:42792796	8	3	2	0.25	0.00667917
chr1:243468014-243471479	+	chr1:243471479	4	1	3	0.75	0.0100188
chr1:243456392-243471479	+	chr1:243471479	4	2	1	0.25	0.00333959
chr1:243708811-243736350	-	chr1:243708811	25	1	19	0.76	0.0634521
chr1:243708811-244006584	-	chr1:243708811	25	2	5	0.2	0.0166979
chr1:243708811-243828185	-	chr1:243708811	25	3	1	0.04	0.00333959
chr1:243776972-243801044	-	chr1:243776972	21	1	8	0.380952	0.0267167
chr1:243776972-244006584	-	chr1:243776972	21	2	7	0.333333	0.0233771
chr1:243776972-243828185	-	chr1:243776972	21	3	3	0.142857	0.0100188
chr1:243776972-243859018	-	chr1:243776972	21	4	3	0.142857	0.0100188
chr1:243800912-243859018	-	chr1:243800912	4	1	2	0.5	0.00667917
chr1:243800912-244006584	-	chr1:243800912	4	2	2	0.5	0.00667917
chr12:45814853-45816845	+	chr12:45816845	11	1	10	0.909091	0.0333959
chr12:45664244-45816845	+	chr12:45816845	11	2	1	0.090909	0.00333959
chr1:246021797-246093239	-	chr1:246021797	35	1	24	0.685714	0.08015
chr1:246021797-246027188	-	chr1:246021797	35	2	11	0.314286	0.0367354
chr12:46240638-46254732	+	chr12:46254732	14	1	10	0.714286	0.0333959
chr12:46230371-46254732	+	chr12:46254732	14	2	4	0.285714	0.0133583
chr12:46622935-46637097	-	chr12:46622935	39	1	30	0.769231	0.100188
chr12:46622935-46648719	-	chr12:46622935	39	2	9	0.230769	0.0300563
chr12:46633461-46637097	-	chr12:46633461	11	1	7	0.636364	0.0233771
chr12:46633461-46648719	-	chr12:46633461	11	2	4	0.363636	0.0133583
chr12:47606379-47610472	+	chr12:47610472	5	1	4	0.8	0.0133583
chr12:47497895-47610472	+	chr12:47610472	5	2	1	0.2	0.00333959
chr12:48477373-48491907	-	chr12:48477373	7	1	4	0.571429	0.0133583
chr12:48477373-48495299	-	chr12:48477373	7	2	3	0.428571	0.0100188
chr12:49719283-49723237	+	chr12:49723237	12	1	6	0.5	0.0200375
chr12:49720450-49723237	+	chr12:49723237	12	2	4	0.333333	0.0133583
chr12:49722709-49723237	+	chr12:49723237	12	3	2	0.166667	0.00667917
chr12:49878372-49893988	+	chr12:49893988	6	1	3	0.5	0.0100188
chr12:49890615-49893988	+	chr12:49893988	6	2	3	0.5	0.0100188
chr12:50384466-50386438	-	chr12:50384466	11	1	7	0.636364	0.0233771
chr12:50384466-50388292	-	chr12:50384466	11	2	4	0.363636	0.0133583
chr12:50385780-50386438	-	chr12:50385780	78	1	74	0.948718	0.247129
chr12:50385780-50388292	-	chr12:50385780	78	2	3	0.038462	0.0100188
chr12:50385780-50410502	-	chr12:50385780	78	3	1	0.012821	0.00333959
chr12:50821544-50822873	+	chr12:50822873	8	1	7	0.875	0.0233771
chr12:50821547-50822873	+	chr12:50822873	8	2	1	0.125	0.00333959
chr12:50821544-50824353	+	chr12:50824353	8	1	7	0.875	0.0233771
chr12:50821547-50824353	+	chr12:50824353	8	2	1	0.125	0.00333959
chr12:50854917-50867950	+	chr12:50867950	6	1	3	0.5	0.0100188
chr12:50860741-50867950	+	chr12:50867950	6	2	2	0.333333	0.00667917
chr12:50856364-50867950	+	chr12:50867950	6	3	1	0.166667	0.00333959
chr12:51079615-51090958	+	chr12:51090958	4	1	2	0.5	0.00667917
chr12:51089049-51090958	+	chr12:51090958	4	2	2	0.5	0.00667917
chr12:51375421-51404549	-	chr12:51375421	8	1	5	0.625	0.0166979
chr12:51375421-51382218	-	chr12:51375421	8	2	3	0.375	0.0100188
chr12:51442816-51450285	+	chr12:51450285	6	1	3	0.5	0.0100188
chr12:51449617-51450285	+	chr12:51450285	6	2	3	0.5	0.0100188
chr12:52369048-52385777	+	chr12:52385777	9	1	7	0.777778	0.0233771
chr12:52385646-52385777	+	chr12:52385777	9	2	2	0.222222	0.00667917
chr12:52631292-52632559	+	chr12:52632559	16	1	13	0.8125	0.0434146
chr12:52632463-52632559	+	chr12:52632559	16	2	3	0.1875	0.0100188
chr12:53421565-53421972	+	chr12:53421972	5	1	4	0.8	0.0133583
chr12:53413693-53421972	+	chr12:53421972	5	2	1	0.2	0.00333959
chr12:53421565-53431406	+	chr12:53431406	5	1	4	0.8	0.0133583
chr12:53431192-53431406	+	chr12:53431406	5	2	1	0.2	0.00333959
chr12:53848509-53862616	+	chr12:53862616	10	1	3	0.3	0.0100188
chr12:53856264-53862616	+	chr12:53862616	10	2	3	0.3	0.0100188
chr12:53856276-53862616	+	chr12:53862616	10	3	3	0.3	0.0100188
chr12:53854798-53862616	+	chr12:53862616	10	4	1	0.1	0.00333959
chr12:53854798-53865591	+	chr12:53865591	7	1	5	0.714286	0.0166979
chr12:53848509-53865591	+	chr12:53865591	7	2	1	0.142857	0.00333959
chr12:53848533-53865591	+	chr12:53865591	7	3	1	0.142857	0.00333959
chr12:54737008-54739299	+	chr12:54739299	10	1	7	0.7	0.0233771
chr12:54735989-54739299	+	chr12:54739299	10	2	3	0.3	0.0100188
chr12:54734330-54741835	+	chr12:54741835	7	1	3	0.428571	0.0100188
chr12:54735989-54741835	+	chr12:54741835	7	2	2	0.285714	0.00667917
chr12:54737008-54741835	+	chr12:54741835	7	3	2	0.285714	0.00667917
chr12:541031-547720	+	chr12:547720	3	1	2	0.666667	0.00667917
chr12:520912-547720	+	chr12:547720	3	2	1	0.333333	0.00333959
chr12:56619156-56620203	+	chr12:56620203	8	1	3	0.375	0.0100188
chr12:56619962-56620203	+	chr12:56620203	8	2	3	0.375	0.0100188
chr12:56618617-56620203	+	chr12:56620203	8	3	2	0.25	0.00667917
chr12:56645798-56645879	-	chr12:56645798	4	1	3	0.75	0.0100188
chr12:56645798-56650869	-	chr12:56645798	4	2	1	0.25	0.00333959
chr12:56956200-56965639	+	chr12:56965639	107	1	92	0.859813	0.307242
chr12:56962758-56965639	+	chr12:56965639	107	2	15	0.140187	0.0500938
chr12:56956200-56975936	+	chr12:56975936	3	1	2	0.666667	0.00667917
chr12:56974967-56975936	+	chr12:56975936	3	2	1	0.333333	0.00333959
chr12:56956200-56982158	+	chr12:56982158	6	1	3	0.5	0.0100188
chr12:56962758-56982158	+	chr12:56982158	6	2	3	0.5	0.0100188
chr12:56998000-56999111	-	chr12:56998000	7	1	6	0.857143	0.0200375
chr12:56998000-57006030	-	chr12:56998000	7	2	1	0.142857	0.00333959
chr12:57059987-57064148	-	chr12:57059987	25	1	22	0.88	0.0734709
chr12:57059987-57066849	-	chr12:57059987	25	2	3	0.12	0.0100188
chr12:57064058-57066849	-	chr12:57064058	4	1	3	0.75	0.0100188
chr12:57064058-57065631	-	chr12:57064058	4	2	1	0.25	0.00333959
chr12:57674140-57677839	-	chr12:57674140	13	1	6	0.461538	0.0200375
chr12:57674140-57690334	-	chr12:57674140	13	2	3	0.230769	0.0100188
chr12:57674140-57686450	-	chr12:57674140	13	3	2	0.153846	0.00667917
chr12:57674140-57789601	-	chr12:57674140	13	4	2	0.153846	0.00667917
chr12:57861115-57862007	+	chr12:57862007	54	1	52	0.962963	0.173658
chr12:57858455-57862007	+	chr12:57862007	54	2	2	0.037037	0.00667917
chr12:62864480-62895478	+	chr12:62895478	2	1	1	0.5	0.00333959
chr12:62894562-62895478	+	chr12:62895478	2	2	1	0.5	0.00333959
chr12:64456696-64509673	+	chr12:64509673	16	1	10	0.625	0.0333959
chr12:64485055-64509673	+	chr12:64509673	16	2	4	0.25	0.0133583
chr12:64474065-64509673	+	chr12:64509673	16	3	1	0.0625	0.00333959
chr12:64502711-64509673	+	chr12:64509673	16	4	1	0.0625	0.00333959
chr12:64878082-64879797	+	chr12:64879797	10	1	6	0.6	0.0200375
chr12:64875621-64879797	+	chr12:64879797	10	2	2	0.2	0.00667917
chr12:64879234-64879797	+	chr12:64879797	10	3	2	0.2	0.00667917
chr1:26584087-26586293	+	chr1:26586293	13	1	12	0.923077	0.040075
chr1:26581661-26586293	+	chr1:26586293	13	2	1	0.076923	0.00333959
chr12:6630963-6631203	+	chr12:6631203	4	1	3	0.75	0.0100188
chr12:6630151-6631203	+	chr12:6631203	4	2	1	0.25	0.00333959
chr12:66909398-66935730	-	chr12:66909398	8	1	5	0.625	0.0166979
chr12:66909398-66990707	-	chr12:66909398	8	2	3	0.375	0.0100188
chr1:26772806-26774151	+	chr1:26774151	89	1	88	0.988764	0.293884
chr1:26769198-26774151	+	chr1:26774151	89	2	1	0.011236	0.00333959
chr1:26784281-26786635	+	chr1:26786635	65	1	46	0.707692	0.153621
chr1:26774049-26786635	+	chr1:26786635	65	2	19	0.292308	0.0634521
chr12:69113120-69129124	+	chr12:69129124	5	1	4	0.8	0.0133583
chr12:69120278-69129124	+	chr12:69129124	5	2	1	0.2	0.00333959
chr12:69214104-69218431	+	chr12:69218431	50	1	39	0.78	0.130244
chr12:69218142-69218431	+	chr12:69218431	50	2	7	0.14	0.0233771
chr12:69210591-69218431	+	chr12:69218431	50	3	4	0.08	0.0133583
chr12:69644908-69656342	+	chr12:69656342	208	1	207	0.995192	0.691294
chr12:69652778-69656342	+	chr12:69656342	208	2	1	0.004808	0.00333959
chr12:70723202-70724249	+	chr12:70724249	19	1	11	0.578947	0.0367354
chr12:70671911-70724249	+	chr12:70724249	19	2	6	0.315789	0.0200375
chr12:70713077-70724249	+	chr12:70724249	19	3	2	0.105263	0.00667917
chr12:74678804-74715474	-	chr12:74678804	39	1	24	0.615385	0.08015
chr12:74678804-74700449	-	chr12:74678804	39	2	10	0.25641	0.0333959
chr12:74678804-74734036	-	chr12:74678804	39	3	3	0.076923	0.0100188
chr12:74678804-74771412	-	chr12:74678804	39	4	2	0.051282	0.00667917
chr12:77191213-77216311	+	chr12:77216311	2	1	1	0.5	0.00333959
chr12:77214837-77216311	+	chr12:77216311	2	2	1	0.5	0.00333959
chr12:78388582-78401225	+	chr12:78401225	4	1	2	0.5	0.00667917
chr12:78400198-78401225	+	chr12:78401225	4	2	2	0.5	0.00667917
chr1:28362054-28369161	-	chr1:28362054	11	1	5	0.454545	0.0166979
chr1:28362054-28384605	-	chr1:28362054	11	2	4	0.363636	0.0133583
chr1:28362054-28362191	-	chr1:28362054	11	3	2	0.181818	0.00667917
chr1:28897687-28898412	+	chr1:28898412	8	1	7	0.875	0.0233771
chr1:28880151-28898412	+	chr1:28898412	8	2	1	0.125	0.00333959
chr12:89853414-89866052	-	chr12:89853414	8	1	7	0.875	0.0233771
chr12:89853414-89861462	-	chr12:89853414	8	2	1	0.125	0.00333959
chr12:89860546-89861462	-	chr12:89860546	2	1	1	0.5	0.00333959
chr12:89860546-89891119	-	chr12:89860546	2	2	1	0.5	0.00333959
chr12:90003713-90005149	-	chr12:90003713	7	1	3	0.428571	0.0100188
chr12:90003713-90049884	-	chr12:90003713	7	2	3	0.428571	0.0100188
chr12:90003713-90029028	-	chr12:90003713	7	3	1	0.142857	0.00333959
chr12:936207-939326	+	chr12:939326	27	1	20	0.740741	0.0667917
chr12:922807-939326	+	chr12:939326	27	2	7	0.259259	0.0233771
chr12:95422162-95445719	-	chr12:95422162	4	1	2	0.5	0.00667917
chr12:95422162-95451419	-	chr12:95422162	4	2	2	0.5	0.00667917
chr12:95645715-95660408	+	chr12:95660408	3	1	2	0.666667	0.00667917
chr12:95660132-95660408	+	chr12:95660408	3	2	1	0.333333	0.00333959
chr12:95660132-95668665	+	chr12:95668665	12	1	9	0.75	0.0300563
chr12:95663814-95668665	+	chr12:95668665	12	2	3	0.25	0.0100188
chr12:95660132-95676420	+	chr12:95676420	9	1	5	0.555556	0.0166979
chr12:95676088-95676420	+	chr12:95676420	9	2	4	0.444444	0.0133583
chr12:95660132-95690034	+	chr12:95690034	26	1	15	0.576923	0.0500938
chr12:95656681-95690034	+	chr12:95690034	26	2	6	0.230769	0.0200375
chr12:95688047-95690034	+	chr12:95690034	26	3	3	0.115385	0.0100188
chr12:95645715-95690034	+	chr12:95690034	26	4	2	0.076923	0.00667917
chr12:96059585-96077487	-	chr12:96059585	7	1	6	0.857143	0.0200375
chr12:96059585-96181246	-	chr12:96059585	7	2	1	0.142857	0.00333959
chr12:96076482-96077487	-	chr12:96076482	52	1	40	0.769231	0.133583
chr12:96076482-96181246	-	chr12:96076482	52	2	8	0.153846	0.0267167
chr12:96076482-96131922	-	chr12:96076482	52	3	4	0.076923	0.0133583
chr13:100953713-101020828	+	chr13:101020828	7	1	6	0.857143	0.0200375
chr13:100962086-101020828	+	chr13:101020828	7	2	1	0.142857	0.00333959
chr13:101077886-101101559	+	chr13:101101559	3	1	2	0.666667	0.00667917
chr13:100982814-101101559	+	chr13:101101559	3	2	1	0.333333	0.00333959
chr13:101910793-101944717	-	chr13:101910793	12	1	6	0.5	0.0200375
chr13:101910793-101997771	-	chr13:101910793	12	2	6	0.5	0.0200375
chr13:101936283-101944717	-	chr13:101936283	12	1	9	0.75	0.0300563
chr13:101936283-101944445	-	chr13:101936283	12	2	3	0.25	0.0100188
chr13:113158345-113181798	-	chr13:113158345	9	1	6	0.666667	0.0200375
chr13:113158345-113202490	-	chr13:113158345	9	2	3	0.333333	0.0100188
chr13:113170753-113181798	-	chr13:113170753	7	1	6	0.857143	0.0200375
chr13:113170753-113200179	-	chr13:113170753	7	2	1	0.142857	0.00333959
chr13:113832487-113854830	-	chr13:113832487	9	1	4	0.444444	0.0133583
chr13:113832487-113838801	-	chr13:113832487	9	2	3	0.333333	0.0100188
chr13:113832487-113839874	-	chr13:113832487	9	3	2	0.222222	0.00667917
chr13:114149816-114175048	+	chr13:114175048	99	1	44	0.444444	0.146942
chr13:114164552-114175048	+	chr13:114175048	99	2	43	0.434343	0.143602
chr13:114170357-114175048	+	chr13:114175048	99	3	12	0.121212	0.040075
chr13:114174930-114193822	+	chr13:114193822	21	1	11	0.52381	0.0367354
chr13:114164552-114193822	+	chr13:114193822	21	2	10	0.47619	0.0333959
chr1:31437520-31454252	-	chr1:31437520	19	1	11	0.578947	0.0367354
chr1:31437520-31441339	-	chr1:31437520	19	2	5	0.263158	0.0166979
chr1:31437520-31437757	-	chr1:31437520	19	3	3	0.157895	0.0100188
chr1:31447497-31454252	-	chr1:31447497	14	1	13	0.928571	0.0434146
chr1:31447497-31447649	-	chr1:31447497	14	2	1	0.071429	0.00333959
chr1:31465236-31468067	-	chr1:31465236	24	1	16	0.666667	0.0534334
chr1:31465236-31479949	-	chr1:31465236	24	2	8	0.333333	0.0267167
chr13:20632714-20633702	+	chr13:20633702	3	1	2	0.666667	0.00667917
chr13:20600751-20633702	+	chr13:20633702	3	2	1	0.333333	0.00333959
chr13:20635192-20641530	+	chr13:20641530	29	1	11	0.37931	0.0367354
chr13:20632714-20641530	+	chr13:20641530	29	2	8	0.275862	0.0267167
chr13:20625572-20641530	+	chr13:20641530	29	3	6	0.206897	0.0200375
chr13:20534097-20641530	+	chr13:20641530	29	4	4	0.137931	0.0133583
chr13:21955572-21965993	-	chr13:21955572	7	1	5	0.714286	0.0166979
chr13:21955572-21974632	-	chr13:21955572	7	2	1	0.142857	0.00333959
chr13:21955572-21975824	-	chr13:21955572	7	3	1	0.142857	0.00333959
chr1:32560384-32566163	+	chr1:32566163	28	1	25	0.892857	0.0834896
chr1:32557275-32566163	+	chr1:32566163	28	2	3	0.107143	0.0100188
chr13:28830428-28835595	+	chr13:28835595	53	1	29	0.54717	0.096848
chr13:28834583-28835595	+	chr13:28835595	53	2	24	0.45283	0.08015
chr13:28830428-28855516	+	chr13:28855516	11	1	9	0.818182	0.0300563
chr13:28834583-28855516	+	chr13:28855516	11	2	2	0.181818	0.00667917
chr13:33054726-33092140	-	chr13:33054726	7	1	4	0.571429	0.0133583
chr13:33054726-33101669	-	chr13:33054726	7	2	3	0.428571	0.0100188
chr13:35615069-35644989	+	chr13:35644989	3	1	2	0.666667	0.00667917
chr13:35619083-35644989	+	chr13:35644989	3	2	1	0.333333	0.00333959
chr13:37614541-37625720	-	chr13:37614541	15	1	12	0.8	0.040075
chr13:37614541-37618318	-	chr13:37614541	15	2	3	0.2	0.0100188
chr13:40293372-40301685	+	chr13:40301685	23	1	22	0.956522	0.0734709
chr13:40268770-40301685	+	chr13:40301685	23	2	1	0.043478	0.00333959
chr13:41826780-41835051	-	chr13:41826780	24	1	16	0.666667	0.0534334
chr13:41826780-41837620	-	chr13:41826780	24	2	8	0.333333	0.0267167
chr13:42149875-42407667	-	chr13:42149875	5	1	4	0.8	0.0133583
chr13:42149875-42189220	-	chr13:42149875	5	2	1	0.2	0.00333959
chr13:42335263-42407667	-	chr13:42335263	17	1	16	0.941176	0.0534334
chr13:42335263-42358037	-	chr13:42335263	17	2	1	0.058824	0.00333959
chr13:42385360-42393522	-	chr13:42385360	49	1	31	0.632653	0.103527
chr13:42385360-42407667	-	chr13:42385360	49	2	18	0.367347	0.0601125
chr13:50296090-50296699	-	chr13:50296090	6	1	5	0.833333	0.0166979
chr13:50296090-50299637	-	chr13:50296090	6	2	1	0.166667	0.00333959
chr13:52992126-53000201	-	chr13:52992126	9	1	6	0.666667	0.0200375
chr13:52992126-53001354	-	chr13:52992126	9	2	3	0.333333	0.0100188
chr13:61013821-61041513	+	chr13:61041513	12	1	11	0.916667	0.0367354
chr13:61018816-61041513	+	chr13:61041513	12	2	1	0.083333	0.00333959
chr13:61034513-61109367	+	chr13:61109367	7	1	4	0.571429	0.0133583
chr13:61013821-61109367	+	chr13:61109367	7	2	3	0.428571	0.0100188
chr1:36411292-36439112	+	chr1:36439112	8	1	5	0.625	0.0166979
chr1:36432555-36439112	+	chr1:36439112	8	2	3	0.375	0.0100188
chr1:36823839-36824423	-	chr1:36823839	13	1	7	0.538462	0.0233771
chr1:36823839-36828257	-	chr1:36823839	13	2	6	0.461538	0.0200375
chr13:75900332-75936743	-	chr13:75900332	27	1	19	0.703704	0.0634521
chr13:75900332-75923438	-	chr13:75900332	27	2	7	0.259259	0.0233771
chr13:75900332-75930387	-	chr13:75900332	27	3	1	0.037037	0.00333959
chr13:77791974-77818086	-	chr13:77791974	5	1	3	0.6	0.0100188
chr13:77791974-77807398	-	chr13:77791974	5	2	2	0.4	0.00667917
chr1:38034451-38042157	-	chr1:38034451	2	1	1	0.5	0.00333959
chr1:38034451-38053096	-	chr1:38034451	2	2	1	0.5	0.00333959
chr13:95686858-95715113	-	chr13:95686858	19	1	6	0.315789	0.0200375
chr13:95686858-95705438	-	chr13:95686858	19	2	3	0.157895	0.0100188
chr13:95686858-95735544	-	chr13:95686858	19	3	3	0.157895	0.0100188
chr13:95686858-95840796	-	chr13:95686858	19	4	3	0.157895	0.0100188
chr13:95686858-95696692	-	chr13:95686858	19	5	2	0.105263	0.00667917
chr13:95686858-95768255	-	chr13:95686858	19	6	2	0.105263	0.00667917
chr13:95695935-95705438	-	chr13:95695935	2	1	1	0.5	0.00333959
chr13:95695935-95735544	-	chr13:95695935	2	2	1	0.5	0.00333959
chr13:95768175-95840796	-	chr13:95768175	37	1	21	0.567568	0.0701313
chr13:95768175-95830345	-	chr13:95768175	37	2	11	0.297297	0.0367354
chr13:95768175-95863035	-	chr13:95768175	37	3	3	0.081081	0.0100188
chr13:95768175-95847191	-	chr13:95768175	37	4	2	0.054054	0.00667917
chr13:95813442-95840796	-	chr13:95813442	23	1	18	0.782609	0.0601125
chr13:95813442-95830345	-	chr13:95813442	23	2	3	0.130435	0.0100188
chr13:95813442-95818621	-	chr13:95813442	23	3	2	0.086957	0.00667917
chr13:95816631-95816772	-	chr13:95816631	3	1	2	0.666667	0.00667917
chr13:95816631-95860179	-	chr13:95816631	3	2	1	0.333333	0.00333959
chr13:95829960-95830345	-	chr13:95829960	44	1	35	0.795455	0.116885
chr13:95829960-95840796	-	chr13:95829960	44	2	9	0.204545	0.0300563
chr13:95858785-95863035	-	chr13:95858785	58	1	39	0.672414	0.130244
chr13:95858785-95887088	-	chr13:95858785	58	2	13	0.224138	0.0434146
chr13:95858785-95861851	-	chr13:95858785	58	3	3	0.051724	0.0100188
chr13:95858785-95900007	-	chr13:95858785	58	4	3	0.051724	0.0100188
chr13:96258256-96261767	-	chr13:96258256	6	1	5	0.833333	0.0166979
chr13:96258256-96295952	-	chr13:96258256	6	2	1	0.166667	0.00333959
chr1:39696853-39723700	+	chr1:39723700	20	1	12	0.6	0.040075
chr1:39719969-39723700	+	chr1:39723700	20	2	8	0.4	0.0267167
chr1:39747879-39753234	+	chr1:39753234	6	1	3	0.5	0.0100188
chr1:39752957-39753234	+	chr1:39753234	6	2	3	0.5	0.0100188
chr13:99017648-99030172	+	chr13:99030172	7	1	6	0.857143	0.0200375
chr13:98865473-99030172	+	chr13:99030172	7	2	1	0.142857	0.00333959
chr13:99890680-99896878	+	chr13:99896878	78	1	74	0.948718	0.247129
chr13:99853682-99896878	+	chr13:99896878	78	2	4	0.051282	0.0133583
chr13:99890680-99970323	+	chr13:99970323	8	1	7	0.875	0.0233771
chr13:99966350-99970323	+	chr13:99970323	8	2	1	0.125	0.00333959
chr1:40654726-40668286	+	chr1:40668286	14	1	10	0.714286	0.0333959
chr1:40656443-40668286	+	chr1:40668286	14	2	4	0.285714	0.0133583
chr14:100317189-100331983	+	chr14:100331983	34	1	28	0.823529	0.0935084
chr14:100331850-100331983	+	chr14:100331983	34	2	6	0.176471	0.0200375
chr14:100380515-100381034	+	chr14:100381034	6	1	5	0.833333	0.0166979
chr14:100367265-100381034	+	chr14:100381034	6	2	1	0.166667	0.00333959
chr14:101435795-101455127	+	chr14:101455127	14	1	9	0.642857	0.0300563
chr14:101434984-101455127	+	chr14:101455127	14	2	5	0.357143	0.0166979
chr14:102368055-102372866	+	chr14:102372866	8	1	7	0.875	0.0233771
chr14:102360843-102372866	+	chr14:102372866	8	2	1	0.125	0.00333959
chr14:102486229-102489217	+	chr14:102489217	58	1	54	0.931034	0.180338
chr14:102482192-102489217	+	chr14:102489217	58	2	4	0.068966	0.0133583
chr14:102904358-102912284	+	chr14:102912284	7	1	4	0.571429	0.0133583
chr14:102909983-102912284	+	chr14:102912284	7	2	3	0.428571	0.0100188
chr14:102900571-102931626	+	chr14:102931626	8	1	5	0.625	0.0166979
chr14:102842986-102931626	+	chr14:102931626	8	2	3	0.375	0.0100188
chr14:103296670-103369766	+	chr14:103369766	41	1	35	0.853659	0.116885
chr14:103336521-103369766	+	chr14:103369766	41	2	6	0.146341	0.0200375
chr14:103918254-103928798	+	chr14:103928798	6	1	3	0.5	0.0100188
chr14:103923478-103928798	+	chr14:103928798	6	2	3	0.5	0.0100188
chr14:105169441-105172513	+	chr14:105172513	5	1	3	0.6	0.0100188
chr14:105172371-105172513	+	chr14:105172513	5	2	2	0.4	0.00667917
chr14:105818714-105821514	+	chr14:105821514	45	1	31	0.688889	0.103527
chr14:105814829-105821514	+	chr14:105821514	45	2	14	0.311111	0.0467542
chr14:105833549-105836237	+	chr14:105836237	3	1	2	0.666667	0.00667917
chr14:105814829-105836237	+	chr14:105836237	3	2	1	0.333333	0.00333959
chr1:41463065-41466789	+	chr1:41466789	56	1	54	0.964286	0.180338
chr1:41454265-41466789	+	chr1:41466789	56	2	2	0.035714	0.00667917
chr1:41466700-41467926	+	chr1:41467926	7	1	6	0.857143	0.0200375
chr1:41463065-41467926	+	chr1:41467926	7	2	1	0.142857	0.00333959
chr1:41536266-41541123	-	chr1:41536266	139	1	137	0.985612	0.457523
chr1:41536266-41627104	-	chr1:41536266	139	2	2	0.014388	0.00667917
chr1:41578954-41608784	-	chr1:41578954	81	1	45	0.555556	0.150281
chr1:41578954-41582682	-	chr1:41578954	81	2	27	0.333333	0.0901688
chr1:41578954-41618413	-	chr1:41578954	81	3	4	0.049383	0.0133583
chr1:41578954-41627104	-	chr1:41578954	81	4	3	0.037037	0.0100188
chr1:41578954-41617356	-	chr1:41578954	81	5	2	0.024691	0.00667917
chr14:20863608-20864108	-	chr14:20863608	16	1	8	0.5	0.0267167
chr14:20863608-20864889	-	chr14:20863608	16	2	6	0.375	0.0200375
chr14:20863608-20872043	-	chr14:20863608	16	3	2	0.125	0.00667917
chr14:21698477-21702388	-	chr14:21698477	75	1	72	0.96	0.24045
chr14:21698477-21699231	-	chr14:21698477	75	2	1	0.013333	0.00333959
chr14:21698477-21730927	-	chr14:21698477	75	3	1	0.013333	0.00333959
chr14:21698477-21731495	-	chr14:21698477	75	4	1	0.013333	0.00333959
chr14:21971315-21972024	-	chr14:21971315	236	1	235	0.995763	0.784803
chr14:21971315-21971720	-	chr14:21971315	236	2	1	0.004237	0.00333959
chr14:23395341-23396869	-	chr14:23395341	40	1	28	0.7	0.0935084
chr14:23395341-23396023	-	chr14:23395341	40	2	12	0.3	0.040075
chr1:42730785-42744343	-	chr1:42730785	16	1	11	0.6875	0.0367354
chr1:42730785-42776781	-	chr1:42730785	16	2	5	0.3125	0.0166979
chr14:31112521-31122794	+	chr14:31122794	21	1	14	0.666667	0.0467542
chr14:31103152-31122794	+	chr14:31122794	21	2	4	0.190476	0.0133583
chr14:31097414-31122794	+	chr14:31122794	21	3	3	0.142857	0.0100188
chr14:31371741-31380368	-	chr14:31371741	11	1	9	0.818182	0.0300563
chr14:31371741-31382863	-	chr14:31371741	11	2	2	0.181818	0.00667917
chr14:31585441-31602881	-	chr14:31585441	7	1	4	0.571429	0.0133583
chr14:31585441-31590711	-	chr14:31585441	7	2	3	0.428571	0.0100188
chr14:31596990-31641328	-	chr14:31596990	15	1	9	0.6	0.0300563
chr14:31596990-31602881	-	chr14:31596990	15	2	4	0.266667	0.0133583
chr14:31596990-31643012	-	chr14:31596990	15	3	1	0.066667	0.00333959
chr14:31596990-31644344	-	chr14:31596990	15	4	1	0.066667	0.00333959
chr14:31849672-31856581	-	chr14:31849672	6	1	4	0.666667	0.0133583
chr14:31849672-31852977	-	chr14:31849672	6	2	2	0.333333	0.00667917
chr14:39746137-39796226	+	chr14:39796226	25	1	18	0.72	0.0601125
chr14:39782543-39796226	+	chr14:39796226	25	2	7	0.28	0.0233771
chr1:44257772-44303983	+	chr1:44303983	16	1	12	0.75	0.040075
chr1:44290402-44303983	+	chr1:44303983	16	2	4	0.25	0.0133583
chr14:45478115-45501579	+	chr14:45501579	16	1	11	0.6875	0.0367354
chr14:45475210-45501579	+	chr14:45501579	16	2	3	0.1875	0.0100188
chr14:45481177-45501579	+	chr14:45501579	16	3	2	0.125	0.00667917
chr14:45478115-45523752	+	chr14:45523752	10	1	8	0.8	0.0267167
chr14:45473263-45523752	+	chr14:45523752	10	2	1	0.1	0.00333959
chr14:45481177-45523752	+	chr14:45523752	10	3	1	0.1	0.00333959
chr1:44750506-44785416	-	chr1:44750506	6	1	4	0.666667	0.0133583
chr1:44750506-44804994	-	chr1:44750506	6	2	2	0.333333	0.00667917
chr1:44773981-44785416	-	chr1:44773981	44	1	20	0.454545	0.0667917
chr1:44773981-44804994	-	chr1:44773981	44	2	15	0.340909	0.0500938
chr1:44773981-44778900	-	chr1:44773981	44	3	5	0.113636	0.0166979
chr1:44773981-44804988	-	chr1:44773981	44	4	4	0.090909	0.0133583
chr1:44804716-44804994	-	chr1:44804716	17	1	14	0.823529	0.0467542
chr1:44804716-44818597	-	chr1:44804716	17	2	3	0.176471	0.0100188
chr14:50929382-50930851	-	chr14:50929382	2	1	1	0.5	0.00333959
chr14:50929382-50952912	-	chr14:50929382	2	2	1	0.5	0.00333959
chr14:51107467-51111732	-	chr14:51107467	32	1	19	0.59375	0.0634521
chr14:51107467-51107611	-	chr14:51107467	32	2	11	0.34375	0.0367354
chr14:51107467-51132337	-	chr14:51107467	32	3	2	0.0625	0.00667917
chr14:53177818-53190754	+	chr14:53190754	2	1	1	0.5	0.00333959
chr14:53185694-53190754	+	chr14:53190754	2	2	1	0.5	0.00333959
chr14:53339516-53340944	-	chr14:53339516	10	1	5	0.5	0.0166979
chr14:53339516-53417295	-	chr14:53339516	10	2	4	0.4	0.0133583
chr14:53339516-53348187	-	chr14:53339516	10	3	1	0.1	0.00333959
chr14:55241651-55243258	+	chr14:55243258	4	1	3	0.75	0.0100188
chr14:55215532-55243258	+	chr14:55243258	4	2	1	0.25	0.00333959
chr14:55451440-55454105	-	chr14:55451440	9	1	6	0.666667	0.0200375
chr14:55451440-55467710	-	chr14:55451440	9	2	3	0.333333	0.0100188
chr14:58724462-58724716	+	chr14:58724716	5	1	3	0.6	0.0100188
chr14:58718836-58724716	+	chr14:58724716	5	2	2	0.4	0.00667917
chr14:58949230-58965678	+	chr14:58965678	5	1	3	0.6	0.0100188
chr14:58956881-58965678	+	chr14:58965678	5	2	2	0.4	0.00667917
chr14:58949230-58979345	+	chr14:58979345	4	1	3	0.75	0.0100188
chr14:58955338-58979345	+	chr14:58979345	4	2	1	0.25	0.00333959
chr14:59925574-59946069	-	chr14:59925574	6	1	5	0.833333	0.0166979
chr14:59925574-59932445	-	chr14:59925574	6	2	1	0.166667	0.00333959
chr1:46066056-46068037	+	chr1:46068037	8	1	4	0.5	0.0133583
chr1:46056894-46068037	+	chr1:46068037	8	2	3	0.375	0.0100188
chr1:46060365-46068037	+	chr1:46068037	8	3	1	0.125	0.00333959
chr1:46105881-46108171	-	chr1:46105881	43	1	39	0.906977	0.130244
chr1:46105881-46120991	-	chr1:46105881	43	2	4	0.093023	0.0133583
chr14:61262934-61346553	+	chr14:61346553	7	1	6	0.857143	0.0200375
chr14:61275042-61346553	+	chr14:61346553	7	2	1	0.142857	0.00333959
chr14:62188226-62188541	+	chr14:62188541	21	1	18	0.857143	0.0601125
chr14:62187099-62188541	+	chr14:62188541	21	2	3	0.142857	0.0100188
chr14:62193423-62194373	+	chr14:62194373	4	1	3	0.75	0.0100188
chr14:62187099-62194373	+	chr14:62194373	4	2	1	0.25	0.00333959
chr14:64906843-64916340	+	chr14:64916340	14	1	5	0.357143	0.0166979
chr14:64908771-64916340	+	chr14:64916340	14	2	5	0.357143	0.0166979
chr14:64914934-64916340	+	chr14:64916340	14	3	4	0.285714	0.0133583
chr14:64988204-64990120	+	chr14:64990120	6	1	5	0.833333	0.0166979
chr14:64977966-64990120	+	chr14:64990120	6	2	1	0.166667	0.00333959
chr14:66028054-66096324	+	chr14:66096324	3	1	2	0.666667	0.00667917
chr14:65922338-66096324	+	chr14:66096324	3	2	1	0.333333	0.00333959
chr14:67431907-67525503	+	chr14:67525503	22	1	20	0.909091	0.0667917
chr14:67490349-67525503	+	chr14:67525503	22	2	2	0.090909	0.00667917
chr14:69369193-69387842	-	chr14:69369193	14	1	6	0.428571	0.0200375
chr14:69369193-69371453	-	chr14:69369193	14	2	5	0.357143	0.0166979
chr14:69369193-69376113	-	chr14:69369193	14	3	3	0.214286	0.0100188
chr14:69919957-69922583	+	chr14:69922583	26	1	21	0.807692	0.0701313
chr14:69921528-69922583	+	chr14:69922583	26	2	5	0.192308	0.0166979
chr14:71209067-71209308	-	chr14:71209067	6	1	4	0.666667	0.0133583
chr14:71209067-71216798	-	chr14:71209067	6	2	2	0.333333	0.00667917
chr14:71428942-71445365	+	chr14:71445365	20	1	12	0.6	0.040075
chr14:71413631-71445365	+	chr14:71445365	20	2	7	0.35	0.0233771
chr14:71434914-71445365	+	chr14:71445365	20	3	1	0.05	0.00333959
chr14:71455283-71462642	+	chr14:71462642	60	1	36	0.6	0.120225
chr14:71443658-71462642	+	chr14:71462642	60	2	20	0.333333	0.0667917
chr14:71413631-71462642	+	chr14:71462642	60	3	3	0.05	0.0100188
chr14:71428942-71462642	+	chr14:71462642	60	4	1	0.016667	0.00333959
chr14:71455283-71476441	+	chr14:71476441	14	1	12	0.857143	0.040075
chr14:71443658-71476441	+	chr14:71476441	14	2	2	0.142857	0.00667917
chr14:71455283-71479919	+	chr14:71479919	15	1	8	0.533333	0.0267167
chr14:71428942-71479919	+	chr14:71479919	15	2	7	0.466667	0.0233771
chr14:71476350-71485879	+	chr14:71485879	9	1	5	0.555556	0.0166979
chr14:71455283-71485879	+	chr14:71485879	9	2	4	0.444444	0.0133583
chr14:71492833-71502874	+	chr14:71502874	33	1	20	0.606061	0.0667917
chr14:71476350-71502874	+	chr14:71502874	33	2	7	0.212121	0.0233771
chr14:71479716-71502874	+	chr14:71502874	33	3	3	0.090909	0.0100188
chr14:71413631-71502874	+	chr14:71502874	33	4	2	0.060606	0.00667917
chr14:71485725-71502874	+	chr14:71502874	33	5	1	0.030303	0.00333959
chr14:71479716-71524441	+	chr14:71524441	6	1	4	0.666667	0.0133583
chr14:71476350-71524441	+	chr14:71524441	6	2	2	0.333333	0.00667917
chr14:71571951-71572157	+	chr14:71572157	20	1	18	0.9	0.0601125
chr14:71476350-71572157	+	chr14:71572157	20	2	2	0.1	0.00667917
chr14:71880664-71884913	+	chr14:71884913	18	1	17	0.944444	0.056773
chr14:71867510-71884913	+	chr14:71884913	18	2	1	0.055556	0.00333959
chr14:73614502-73640415	+	chr14:73640415	50	1	39	0.78	0.130244
chr14:73637504-73640415	+	chr14:73640415	50	2	11	0.22	0.0367354
chr14:73637504-73653628	+	chr14:73653628	5	1	3	0.6	0.0100188
chr14:73614502-73653628	+	chr14:73653628	5	2	2	0.4	0.00667917
chr14:74360499-74370813	+	chr14:74370813	7	1	6	0.857143	0.0200375
chr14:74364773-74370813	+	chr14:74370813	7	2	1	0.142857	0.00333959
chr14:74358729-74376133	+	chr14:74376133	11	1	7	0.636364	0.0233771
chr14:74371604-74376133	+	chr14:74376133	11	2	4	0.363636	0.0133583
chr14:75130601-75139655	-	chr14:75130601	7	1	5	0.714286	0.0166979
chr14:75130601-75130777	-	chr14:75130601	7	2	2	0.285714	0.00667917
chr14:75553720-75555344	-	chr14:75553720	10	1	6	0.6	0.0200375
chr14:75553720-75590926	-	chr14:75553720	10	2	4	0.4	0.0133583
chr14:75562074-75590926	-	chr14:75562074	5	1	4	0.8	0.0133583
chr14:75562074-75570700	-	chr14:75562074	5	2	1	0.2	0.00333959
chr14:75567694-75570700	-	chr14:75567694	22	1	14	0.636364	0.0467542
chr14:75567694-75590926	-	chr14:75567694	22	2	4	0.181818	0.0133583
chr14:75567694-75568468	-	chr14:75567694	22	3	3	0.136364	0.0100188
chr14:75567694-75574190	-	chr14:75567694	22	4	1	0.045455	0.00333959
chr14:75576387-75577074	-	chr14:75576387	35	1	30	0.857143	0.100188
chr14:75576387-75587877	-	chr14:75576387	35	2	3	0.085714	0.0100188
chr14:75576387-75590926	-	chr14:75576387	35	3	2	0.057143	0.00667917
chr14:75580041-75581016	-	chr14:75580041	4	1	3	0.75	0.0100188
chr14:75580041-75590926	-	chr14:75580041	4	2	1	0.25	0.00333959
chr14:76099971-76108241	+	chr14:76108241	3	1	2	0.666667	0.00667917
chr14:76107297-76108241	+	chr14:76108241	3	2	1	0.333333	0.00333959
chr14:76184203-76187046	+	chr14:76187046	20	1	16	0.8	0.0534334
chr14:76173360-76187046	+	chr14:76187046	20	2	4	0.2	0.0133583
chr14:76173360-76201632	+	chr14:76201632	21	1	11	0.52381	0.0367354
chr14:76198680-76201632	+	chr14:76201632	21	2	9	0.428571	0.0300563
chr14:76184203-76201632	+	chr14:76201632	21	3	1	0.047619	0.00333959
chr14:76248829-76249873	+	chr14:76249873	9	1	8	0.888889	0.0267167
chr14:76232404-76249873	+	chr14:76249873	9	2	1	0.111111	0.00333959
chr14:76349027-76368567	+	chr14:76368567	21	1	13	0.619048	0.0434146
chr14:76330009-76368567	+	chr14:76368567	21	2	8	0.380952	0.0267167
chr14:76633005-76647192	+	chr14:76647192	75	1	70	0.933333	0.233771
chr14:76620696-76647192	+	chr14:76647192	75	2	3	0.04	0.0100188
chr14:76638185-76647192	+	chr14:76647192	75	3	2	0.026667	0.00667917
chr14:76633005-76662315	+	chr14:76662315	165	1	92	0.557576	0.307242
chr14:76642965-76662315	+	chr14:76662315	165	2	71	0.430303	0.237111
chr14:76638185-76662315	+	chr14:76662315	165	3	2	0.012121	0.00667917
chr1:47745912-47748131	-	chr1:47745912	35	1	25	0.714286	0.0834896
chr1:47745912-47770668	-	chr1:47745912	35	2	7	0.2	0.0233771
chr1:47745912-47761520	-	chr1:47745912	35	3	3	0.085714	0.0100188
chr14:77914836-77917676	-	chr14:77914836	3	1	2	0.666667	0.00667917
chr14:77914836-77920445	-	chr14:77914836	3	2	1	0.333333	0.00333959
chr14:77930940-77934851	+	chr14:77934851	10	1	6	0.6	0.0200375
chr14:77934425-77934851	+	chr14:77934851	10	2	4	0.4	0.0133583
chr14:81209418-81227957	-	chr14:81209418	16	1	9	0.5625	0.0300563
chr14:81209418-81244390	-	chr14:81209418	16	2	6	0.375	0.0200375
chr14:81209418-81307112	-	chr14:81209418	16	3	1	0.0625	0.00333959
chr14:81329100-81372425	-	chr14:81329100	6	1	4	0.666667	0.0133583
chr14:81329100-81366373	-	chr14:81329100	6	2	2	0.333333	0.00667917
chr14:90446883-90499558	+	chr14:90499558	4	1	2	0.5	0.00667917
chr14:90437518-90499558	+	chr14:90499558	4	2	1	0.25	0.00333959
chr14:90485659-90499558	+	chr14:90499558	4	3	1	0.25	0.00333959
chr14:91110391-91124731	-	chr14:91110391	8	1	5	0.625	0.0166979
chr14:91110391-91252672	-	chr14:91110391	8	2	3	0.375	0.0100188
chr14:91409421-91413894	-	chr14:91409421	8	1	7	0.875	0.0233771
chr14:91409421-91467503	-	chr14:91409421	8	2	1	0.125	0.00333959
chr14:91947919-91952074	-	chr14:91947919	7	1	4	0.571429	0.0133583
chr14:91947919-91957146	-	chr14:91947919	7	2	3	0.428571	0.0100188
chr14:92264128-92268765	-	chr14:92264128	2	1	1	0.5	0.00333959
chr14:92264128-92280169	-	chr14:92264128	2	2	1	0.5	0.00333959
chr14:93263752-93282766	+	chr14:93282766	6	1	3	0.5	0.0100188
chr14:93275644-93282766	+	chr14:93282766	6	2	3	0.5	0.0100188
chr14:93760203-93762503	-	chr14:93760203	4	1	3	0.75	0.0100188
chr14:93760203-93761283	-	chr14:93760203	4	2	1	0.25	0.00333959
chr1:51171457-51210447	-	chr1:51171457	4	1	3	0.75	0.0100188
chr1:51171457-51204626	-	chr1:51171457	4	2	1	0.25	0.00333959
chr1:51253671-51267349	-	chr1:51253671	12	1	10	0.833333	0.0333959
chr1:51253671-51323669	-	chr1:51253671	12	2	2	0.166667	0.00667917
chr1:51860052-51868197	-	chr1:51860052	2	1	1	0.5	0.00333959
chr1:51860052-51887530	-	chr1:51860052	2	2	1	0.5	0.00333959
chr1:51868106-51874004	-	chr1:51868106	15	1	13	0.866667	0.0434146
chr1:51868106-51871780	-	chr1:51868106	15	2	2	0.133333	0.00667917
chr1:52215816-52227643	+	chr1:52227643	16	1	15	0.9375	0.0500938
chr1:52226361-52227643	+	chr1:52227643	16	2	1	0.0625	0.00333959
chr1:52211207-52231653	+	chr1:52231653	8	1	3	0.375	0.0100188
chr1:52215816-52231653	+	chr1:52231653	8	2	3	0.375	0.0100188
chr1:52226361-52231653	+	chr1:52231653	8	3	2	0.25	0.00667917
chr1:52237741-52238395	+	chr1:52238395	22	1	11	0.5	0.0367354
chr1:52179674-52238395	+	chr1:52238395	22	2	8	0.363636	0.0267167
chr1:52211207-52238395	+	chr1:52238395	22	3	3	0.136364	0.0100188
chr15:23014437-23019856	-	chr15:23014437	6	1	5	0.833333	0.0166979
chr15:23014437-23014528	-	chr15:23014437	6	2	1	0.166667	0.00333959
chr15:25650607-25657118	-	chr15:25650607	34	1	24	0.705882	0.08015
chr15:25650607-25660989	-	chr15:25650607	34	2	10	0.294118	0.0333959
chr15:28389018-28391490	-	chr15:28389018	13	1	11	0.846154	0.0367354
chr15:28389018-28427658	-	chr15:28389018	13	2	2	0.153846	0.00667917
chr15:28482108-28508315	-	chr15:28482108	2	1	1	0.5	0.00333959
chr15:28482108-28544662	-	chr15:28482108	2	2	1	0.5	0.00333959
chr15:28491026-28492043	-	chr15:28491026	23	1	11	0.478261	0.0367354
chr15:28491026-28502407	-	chr15:28491026	23	2	7	0.304348	0.0233771
chr15:28491026-28493882	-	chr15:28491026	23	3	5	0.217391	0.0166979
chr15:28857204-28878886	+	chr15:28878886	3	1	2	0.666667	0.00667917
chr15:28874411-28878886	+	chr15:28878886	3	2	1	0.333333	0.00333959
chr15:29346047-29347038	+	chr15:29347038	3	1	2	0.666667	0.00667917
chr15:29287955-29347038	+	chr15:29347038	3	2	1	0.333333	0.00333959
chr15:30053341-30065560	-	chr15:30053341	163	1	92	0.564417	0.307242
chr15:30053341-30092905	-	chr15:30053341	163	2	71	0.435583	0.237111
chr15:30922905-30939917	+	chr15:30939917	2	1	1	0.5	0.00333959
chr15:30927282-30939917	+	chr15:30939917	2	2	1	0.5	0.00333959
chr15:31008422-31042759	+	chr15:31042759	26	1	23	0.884615	0.0768105
chr15:30922905-31042759	+	chr15:31042759	26	2	1	0.038462	0.00333959
chr15:30950968-31042759	+	chr15:31042759	26	3	1	0.038462	0.00333959
chr15:31040778-31042759	+	chr15:31042759	26	4	1	0.038462	0.00333959
chr1:53326402-53333449	+	chr1:53333449	4	1	3	0.75	0.0100188
chr1:53332174-53333449	+	chr1:53333449	4	2	1	0.25	0.00333959
chr1:53343353-53352725	+	chr1:53352725	2	1	1	0.5	0.00333959
chr1:53351504-53352725	+	chr1:53352725	2	2	1	0.5	0.00333959
chr15:35189097-35189906	-	chr15:35189097	4	1	3	0.75	0.0100188
chr15:35189097-35222572	-	chr15:35189097	4	2	1	0.25	0.00333959
chr15:35219235-35224635	-	chr15:35219235	5	1	4	0.8	0.0133583
chr15:35219235-35231014	-	chr15:35219235	5	2	1	0.2	0.00333959
chr15:37001423-37002162	+	chr15:37002162	11	1	7	0.636364	0.0233771
chr15:36983885-37002162	+	chr15:37002162	11	2	4	0.363636	0.0133583
chr15:41361767-41362745	-	chr15:41361767	25	1	23	0.92	0.0768105
chr15:41361767-41372102	-	chr15:41361767	25	2	1	0.04	0.00333959
chr15:41361767-41379880	-	chr15:41361767	25	3	1	0.04	0.00333959
chr15:41535864-41555081	+	chr15:41555081	9	1	7	0.777778	0.0233771
chr15:41549107-41555081	+	chr15:41555081	9	2	2	0.222222	0.00667917
chr15:41988272-41991357	+	chr15:41991357	28	1	22	0.785714	0.0734709
chr15:41961025-41991357	+	chr15:41991357	28	2	6	0.214286	0.0200375
chr1:54266365-54293846	-	chr1:54266365	5	1	3	0.6	0.0100188
chr1:54266365-54298264	-	chr1:54266365	5	2	2	0.4	0.00667917
chr1:54269600-54298264	-	chr1:54269600	5	1	4	0.8	0.0133583
chr1:54269600-54293846	-	chr1:54269600	5	2	1	0.2	0.00333959
chr15:43067332-43103978	-	chr15:43067332	5	1	3	0.6	0.0100188
chr15:43067332-43132631	-	chr15:43067332	5	2	2	0.4	0.00667917
chr15:43069228-43086999	-	chr15:43069228	6	1	3	0.5	0.0100188
chr15:43069228-43132631	-	chr15:43069228	6	2	3	0.5	0.0100188
chr15:43086841-43109295	-	chr15:43086841	10	1	9	0.9	0.0300563
chr15:43086841-43170882	-	chr15:43086841	10	2	1	0.1	0.00333959
chr15:43102811-43109295	-	chr15:43102811	17	1	13	0.764706	0.0434146
chr15:43102811-43132631	-	chr15:43102811	17	2	2	0.117647	0.00667917
chr15:43102811-43120230	-	chr15:43102811	17	3	1	0.058824	0.00333959
chr15:43102811-43122276	-	chr15:43102811	17	4	1	0.058824	0.00333959
chr15:43250210-43258484	-	chr15:43250210	4	1	3	0.75	0.0100188
chr15:43250210-43252899	-	chr15:43250210	4	2	1	0.25	0.00333959
chr15:43268914-43294902	-	chr15:43268914	4	1	2	0.5	0.00667917
chr15:43268914-43282318	-	chr15:43268914	4	2	1	0.25	0.00333959
chr15:43268914-43290463	-	chr15:43268914	4	3	1	0.25	0.00333959
chr15:44620882-44630515	+	chr15:44630515	5	1	4	0.8	0.0133583
chr15:44615162-44630515	+	chr15:44630515	5	2	1	0.2	0.00333959
chr15:44859621-44862856	-	chr15:44859621	5	1	4	0.8	0.0133583
chr15:44859621-44865943	-	chr15:44859621	5	2	1	0.2	0.00333959
chr15:44884528-44889141	-	chr15:44884528	3	1	2	0.666667	0.00667917
chr15:44884528-44891034	-	chr15:44884528	3	2	1	0.333333	0.00333959
chr15:45360378-45361250	+	chr15:45361250	3	1	2	0.666667	0.00667917
chr15:45357468-45361250	+	chr15:45361250	3	2	1	0.333333	0.00333959
chr15:50592985-50593565	-	chr15:50592985	65	1	32	0.492308	0.106867
chr15:50592985-50601995	-	chr15:50592985	65	2	19	0.292308	0.0634521
chr15:50592985-50596330	-	chr15:50592985	65	3	14	0.215385	0.0467542
chr15:50923613-50925189	-	chr15:50923613	8	1	5	0.625	0.0166979
chr15:50923613-50941082	-	chr15:50923613	8	2	2	0.25	0.00667917
chr15:50923613-50955243	-	chr15:50923613	8	3	1	0.125	0.00333959
chr15:50935536-50955243	-	chr15:50935536	6	1	4	0.666667	0.0133583
chr15:50935536-50941082	-	chr15:50935536	6	2	2	0.333333	0.00667917
chr15:52186011-52194233	+	chr15:52194233	6	1	5	0.833333	0.0166979
chr15:52192351-52194233	+	chr15:52194233	6	2	1	0.166667	0.00333959
chr15:52697483-52702673	-	chr15:52697483	3	1	2	0.666667	0.00667917
chr15:52697483-52708498	-	chr15:52697483	3	2	1	0.333333	0.00333959
chr15:53957768-53998271	-	chr15:53957768	11	1	9	0.818182	0.0300563
chr15:53957768-53994551	-	chr15:53957768	11	2	2	0.181818	0.00667917
chr15:55621921-55634000	+	chr15:55634000	11	1	8	0.727273	0.0267167
chr15:55619728-55634000	+	chr15:55634000	11	2	3	0.272727	0.0100188
chr15:56152604-56164674	-	chr15:56152604	7	1	4	0.571429	0.0133583
chr15:56152604-56152772	-	chr15:56152604	7	2	3	0.428571	0.0100188
chr15:56434975-56436681	-	chr15:56434975	25	1	9	0.36	0.0300563
chr15:56434975-56535485	-	chr15:56434975	25	2	9	0.36	0.0300563
chr15:56434975-56471501	-	chr15:56434975	25	3	7	0.28	0.0233771
chr15:56680669-56687032	+	chr15:56687032	2	1	1	0.5	0.00333959
chr15:56686362-56687032	+	chr15:56687032	2	2	1	0.5	0.00333959
chr15:57355947-57384089	+	chr15:57384089	12	1	6	0.5	0.0200375
chr15:57212089-57384089	+	chr15:57384089	12	2	5	0.416667	0.0166979
chr15:57364850-57384089	+	chr15:57384089	12	3	1	0.083333	0.00333959
chr15:57535669-57545666	+	chr15:57545666	7	1	4	0.571429	0.0133583
chr15:57212089-57545666	+	chr15:57545666	7	2	3	0.428571	0.0100188
chr15:59204761-59209198	-	chr15:59204761	15	1	14	0.933333	0.0467542
chr15:59204761-59205895	-	chr15:59204761	15	2	1	0.066667	0.00333959
chr15:59376327-59377984	+	chr15:59377984	14	1	9	0.642857	0.0300563
chr15:59376300-59377984	+	chr15:59377984	14	2	3	0.214286	0.0100188
chr15:59373134-59377984	+	chr15:59377984	14	3	2	0.142857	0.00667917
chr15:59445788-59455502	-	chr15:59445788	24	1	11	0.458333	0.0367354
chr15:59445788-59450578	-	chr15:59445788	24	2	8	0.333333	0.0267167
chr15:59445788-59510286	-	chr15:59445788	24	3	4	0.166667	0.0133583
chr15:59445788-59480415	-	chr15:59445788	24	4	1	0.041667	0.00333959
chr15:59470591-59480415	-	chr15:59470591	15	1	11	0.733333	0.0367354
chr15:59470591-59510286	-	chr15:59470591	15	2	4	0.266667	0.0133583
chr15:59510089-59548577	-	chr15:59510089	7	1	6	0.857143	0.0200375
chr15:59510089-59517022	-	chr15:59510089	7	2	1	0.142857	0.00333959
chr15:59548482-59564648	-	chr15:59548482	25	1	21	0.84	0.0701313
chr15:59548482-59552132	-	chr15:59548482	25	2	2	0.08	0.00667917
chr15:59548482-59563433	-	chr15:59548482	25	3	2	0.08	0.00667917
chr15:60648117-60656722	-	chr15:60648117	36	1	30	0.833333	0.100188
chr15:60648117-60674640	-	chr15:60648117	36	2	6	0.166667	0.0200375
chr15:60653139-60656722	-	chr15:60653139	11	1	7	0.636364	0.0233771
chr15:60653139-60674640	-	chr15:60653139	11	2	2	0.181818	0.00667917
chr15:60653139-60678285	-	chr15:60653139	11	3	2	0.181818	0.00667917
chr15:63821212-63829355	+	chr15:63829355	50	1	43	0.86	0.143602
chr15:63824845-63829355	+	chr15:63829355	50	2	7	0.14	0.0233771
chr15:63824845-63852169	+	chr15:63852169	42	1	21	0.5	0.0701313
chr15:63850304-63852169	+	chr15:63852169	42	2	14	0.333333	0.0467542
chr15:63845913-63852169	+	chr15:63852169	42	3	7	0.166667	0.0233771
chr15:63824845-63855207	+	chr15:63855207	103	1	58	0.563107	0.193696
chr15:63845913-63855207	+	chr15:63855207	103	2	30	0.291262	0.100188
chr15:63821212-63855207	+	chr15:63855207	103	3	15	0.145631	0.0500938
chr15:63824845-63866602	+	chr15:63866602	24	1	11	0.458333	0.0367354
chr15:63821212-63866602	+	chr15:63866602	24	2	6	0.25	0.0200375
chr15:63845913-63866602	+	chr15:63866602	24	3	4	0.166667	0.0133583
chr15:63855093-63866602	+	chr15:63866602	24	4	3	0.125	0.0100188
chr15:63961736-63964893	-	chr15:63961736	7	1	5	0.714286	0.0166979
chr15:63961736-64041990	-	chr15:63961736	7	2	2	0.285714	0.00667917
chr15:63998978-64015554	-	chr15:63998978	3	1	2	0.666667	0.00667917
chr15:63998978-64048947	-	chr15:63998978	3	2	1	0.333333	0.00333959
chr15:64019845-64040057	-	chr15:64019845	3	1	2	0.666667	0.00667917
chr15:64019845-64027048	-	chr15:64019845	3	2	1	0.333333	0.00333959
chr15:64495280-64508912	-	chr15:64495280	19	1	14	0.736842	0.0467542
chr15:64495280-64499793	-	chr15:64495280	19	2	5	0.263158	0.0166979
chr15:64710739-64717830	+	chr15:64717830	20	1	15	0.75	0.0500938
chr15:64686144-64717830	+	chr15:64717830	20	2	5	0.25	0.0166979
chr15:65266939-65275931	-	chr15:65266939	18	1	14	0.777778	0.0467542
chr15:65266939-65268893	-	chr15:65266939	18	2	2	0.111111	0.00667917
chr15:65266939-65273363	-	chr15:65266939	18	3	2	0.111111	0.00667917
chr15:65273201-65275931	-	chr15:65273201	22	1	15	0.681818	0.0500938
chr15:65273201-65273363	-	chr15:65273201	22	2	7	0.318182	0.0233771
chr15:65756098-65772737	-	chr15:65756098	5	1	3	0.6	0.0100188
chr15:65756098-65793117	-	chr15:65756098	5	2	2	0.4	0.00667917
chr15:65759015-65772737	-	chr15:65759015	7	1	3	0.428571	0.0100188
chr15:65759015-65777498	-	chr15:65759015	7	2	2	0.285714	0.00667917
chr15:65759015-65759561	-	chr15:65759015	7	3	1	0.142857	0.00333959
chr15:65759015-65808129	-	chr15:65759015	7	4	1	0.142857	0.00333959
chr15:65766546-65773953	-	chr15:65766546	5	1	3	0.6	0.0100188
chr15:65766546-65777498	-	chr15:65766546	5	2	2	0.4	0.00667917
chr15:65771217-65772737	-	chr15:65771217	9	1	6	0.666667	0.0200375
chr15:65771217-65804902	-	chr15:65771217	9	2	2	0.222222	0.00667917
chr15:65771217-65773953	-	chr15:65771217	9	3	1	0.111111	0.00333959
chr15:65844013-65856680	+	chr15:65856680	11	1	8	0.727273	0.0267167
chr15:65847224-65856680	+	chr15:65856680	11	2	3	0.272727	0.0100188
chr15:66021409-66031213	-	chr15:66021409	14	1	7	0.5	0.0233771
chr15:66021409-66048810	-	chr15:66021409	14	2	7	0.5	0.0233771
chr15:66824584-66832548	+	chr15:66832548	8	1	4	0.5	0.0133583
chr15:66821189-66832548	+	chr15:66832548	8	2	3	0.375	0.0100188
chr15:66819627-66832548	+	chr15:66832548	8	3	1	0.125	0.00333959
chr15:66824584-66839043	+	chr15:66839043	7	1	5	0.714286	0.0166979
chr15:66828270-66839043	+	chr15:66839043	7	2	2	0.285714	0.00667917
chr15:67873091-67893087	+	chr15:67893087	10	1	8	0.8	0.0267167
chr15:67842371-67893087	+	chr15:67893087	10	2	2	0.2	0.00667917
chr15:68434283-68457142	+	chr15:68457142	15	1	14	0.933333	0.0467542
chr15:68378643-68457142	+	chr15:68457142	15	2	1	0.066667	0.00333959
chr15:69548132-69553668	+	chr15:69553668	17	1	14	0.823529	0.0467542
chr15:69502654-69553668	+	chr15:69553668	17	2	3	0.176471	0.0100188
chr15:69672221-69682119	+	chr15:69682119	17	1	12	0.705882	0.040075
chr15:69677015-69682119	+	chr15:69682119	17	2	5	0.294118	0.0166979
chr1:56977647-57002784	-	chr1:56977647	11	1	9	0.818182	0.0300563
chr1:56977647-56990226	-	chr1:56977647	11	2	2	0.181818	0.00667917
chr15:71534987-71549054	+	chr15:71549054	84	1	71	0.845238	0.237111
chr15:71433787-71549054	+	chr15:71549054	84	2	13	0.154762	0.0434146
chr15:71433787-71704162	+	chr15:71704162	10	1	5	0.5	0.0166979
chr15:71534987-71704162	+	chr15:71704162	10	2	4	0.4	0.0133583
chr15:71640646-71704162	+	chr15:71704162	10	3	1	0.1	0.00333959
chr15:71952868-71953073	+	chr15:71953073	26	1	21	0.807692	0.0701313
chr15:71704025-71953073	+	chr15:71953073	26	2	5	0.192308	0.0166979
chr15:72180344-72186119	-	chr15:72180344	8	1	4	0.5	0.0133583
chr15:72180344-72197347	-	chr15:72180344	8	2	4	0.5	0.0133583
chr15:72292191-72338975	-	chr15:72292191	6	1	4	0.666667	0.0133583
chr15:72292191-72320134	-	chr15:72292191	6	2	2	0.333333	0.00667917
chr15:72300166-72320134	-	chr15:72300166	6	1	5	0.833333	0.0166979
chr15:72300166-72324929	-	chr15:72300166	6	2	1	0.166667	0.00333959
chr15:72499068-72511451	-	chr15:72499068	21	1	13	0.619048	0.0434146
chr15:72499068-72501232	-	chr15:72499068	21	2	8	0.380952	0.0267167
chr15:72502013-72511451	-	chr15:72502013	2	1	1	0.5	0.00333959
chr15:72502013-72513625	-	chr15:72502013	2	2	1	0.5	0.00333959
chr15:72509749-72511451	-	chr15:72509749	41	1	39	0.95122	0.130244
chr15:72509749-72513625	-	chr15:72509749	41	2	2	0.04878	0.00667917
chr15:72542360-72563445	-	chr15:72542360	12	1	10	0.833333	0.0333959
chr15:72542360-72543596	-	chr15:72542360	12	2	2	0.166667	0.00667917
chr15:72545777-72548931	-	chr15:72545777	3	1	2	0.666667	0.00667917
chr15:72545777-72546861	-	chr15:72545777	3	2	1	0.333333	0.00333959
chr15:72837160-72855841	+	chr15:72855841	4	1	3	0.75	0.0100188
chr15:72810407-72855841	+	chr15:72855841	4	2	1	0.25	0.00333959
chr15:72855734-72864506	+	chr15:72864506	43	1	12	0.27907	0.040075
chr15:72837160-72864506	+	chr15:72864506	43	2	10	0.232558	0.0333959
chr15:72810407-72864506	+	chr15:72864506	43	3	9	0.209302	0.0300563
chr15:72862517-72864506	+	chr15:72864506	43	4	7	0.162791	0.0233771
chr15:72858903-72864506	+	chr15:72864506	43	5	5	0.116279	0.0166979
chr15:75215988-75219228	-	chr15:75215988	51	1	42	0.823529	0.140263
chr15:75215988-75221573	-	chr15:75215988	51	2	9	0.176471	0.0300563
chr15:75706545-75715164	-	chr15:75706545	10	1	9	0.9	0.0300563
chr15:75706545-75722749	-	chr15:75706545	10	2	1	0.1	0.00333959
chr15:75722527-75740084	-	chr15:75722527	5	1	3	0.6	0.0100188
chr15:75722527-75722749	-	chr15:75722527	5	2	2	0.4	0.00667917
chr15:75766029-75772255	-	chr15:75766029	8	1	5	0.625	0.0166979
chr15:75766029-75782642	-	chr15:75766029	8	2	3	0.375	0.0100188
chr15:75815461-75816639	-	chr15:75815461	8	1	5	0.625	0.0166979
chr15:75815461-75819602	-	chr15:75815461	8	2	3	0.375	0.0100188
chr15:75901898-75902335	-	chr15:75901898	7	1	5	0.714286	0.0166979
chr15:75901898-75913397	-	chr15:75901898	7	2	2	0.285714	0.00667917
chr15:76146726-76175765	+	chr15:76175765	11	1	5	0.454545	0.0166979
chr15:76152218-76175765	+	chr15:76175765	11	2	5	0.454545	0.0166979
chr15:76168527-76175765	+	chr15:76175765	11	3	1	0.090909	0.00333959
chr15:76566752-76588078	-	chr15:76566752	228	1	215	0.942982	0.718011
chr15:76566752-76585041	-	chr15:76566752	228	2	10	0.04386	0.0333959
chr15:76566752-76580286	-	chr15:76566752	228	3	3	0.013158	0.0100188
chr15:76576097-76588078	-	chr15:76576097	37	1	23	0.621622	0.0768105
chr15:76576097-76585041	-	chr15:76576097	37	2	12	0.324324	0.040075
chr15:76576097-76580286	-	chr15:76576097	37	3	2	0.054054	0.00667917
chr15:76584771-76588078	-	chr15:76584771	104	1	84	0.807692	0.280525
chr15:76584771-76585041	-	chr15:76584771	104	2	20	0.192308	0.0667917
chr15:76994098-76998325	-	chr15:76994098	4	1	2	0.5	0.00667917
chr15:76994098-77064295	-	chr15:76994098	4	2	2	0.5	0.00667917
chr15:77344726-77348597	-	chr15:77344726	10	1	7	0.7	0.0233771
chr15:77344726-77348205	-	chr15:77344726	10	2	3	0.3	0.0100188
chr15:78305164-78322512	-	chr15:78305164	4	1	3	0.75	0.0100188
chr15:78305164-78317839	-	chr15:78305164	4	2	1	0.25	0.00333959
chr15:78837210-78838106	+	chr15:78838106	8	1	7	0.875	0.0233771
chr15:78836531-78838106	+	chr15:78838106	8	2	1	0.125	0.00333959
chr15:79080572-79083565	-	chr15:79080572	3	1	2	0.666667	0.00667917
chr15:79080572-79092889	-	chr15:79080572	3	2	1	0.333333	0.00333959
chr15:80412669-80415142	+	chr15:80415142	162	1	159	0.981481	0.530994
chr15:80390757-80415142	+	chr15:80415142	162	2	3	0.018519	0.0100188
chr15:80743220-80767564	+	chr15:80767564	35	1	32	0.914286	0.106867
chr15:80762558-80767564	+	chr15:80767564	35	2	2	0.057143	0.00667917
chr15:80750269-80767564	+	chr15:80767564	35	3	1	0.028571	0.00333959
chr15:82443805-82444764	-	chr15:82443805	42	1	20	0.47619	0.0667917
chr15:82443805-82456325	-	chr15:82443805	42	2	15	0.357143	0.0500938
chr15:82443805-82450201	-	chr15:82443805	42	3	5	0.119048	0.0166979
chr15:82443805-82507196	-	chr15:82443805	42	4	2	0.047619	0.00667917
chr15:83819966-83832827	-	chr15:83819966	7	1	6	0.857143	0.0200375
chr15:83819966-83826793	-	chr15:83819966	7	2	1	0.142857	0.00333959
chr15:85607600-85610435	+	chr15:85610435	221	1	208	0.941176	0.694634
chr15:85610244-85610435	+	chr15:85610435	221	2	13	0.058824	0.0434146
chr15:85610244-85626875	+	chr15:85626875	37	1	20	0.540541	0.0667917
chr15:85607600-85626875	+	chr15:85626875	37	2	10	0.27027	0.0333959
chr15:85619092-85626875	+	chr15:85626875	37	3	7	0.189189	0.0233771
chr15:85607600-85652361	+	chr15:85652361	16	1	14	0.875	0.0467542
chr15:85626786-85652361	+	chr15:85652361	16	2	2	0.125	0.00667917
chr15:85657103-85661070	+	chr15:85661070	22	1	14	0.636364	0.0467542
chr15:85633948-85661070	+	chr15:85661070	22	2	5	0.227273	0.0166979
chr15:85607600-85661070	+	chr15:85661070	22	3	3	0.136364	0.0100188
chr15:85656607-85669605	+	chr15:85669605	63	1	57	0.904762	0.190356
chr15:85666291-85669605	+	chr15:85669605	63	2	6	0.095238	0.0200375
chr15:86118361-86201821	+	chr15:86201821	2	1	1	0.5	0.00333959
chr15:86182604-86201821	+	chr15:86201821	2	2	1	0.5	0.00333959
chr15:86198647-86213061	+	chr15:86213061	32	1	22	0.6875	0.0734709
chr15:86207793-86213061	+	chr15:86213061	32	2	10	0.3125	0.0333959
chr15:86212952-86236682	+	chr15:86236682	4	1	2	0.5	0.00667917
chr15:86205618-86236682	+	chr15:86236682	4	2	1	0.25	0.00333959
chr15:86207793-86236682	+	chr15:86236682	4	3	1	0.25	0.00333959
chr15:88576087-88799399	-	chr15:88576087	31	1	20	0.645161	0.0667917
chr15:88576087-88680792	-	chr15:88576087	31	2	10	0.322581	0.0333959
chr15:88576087-88690634	-	chr15:88576087	31	3	1	0.032258	0.00333959
chr15:88669501-88799399	-	chr15:88669501	83	1	30	0.361446	0.100188
chr15:88669501-88670457	-	chr15:88669501	83	2	28	0.337349	0.0935084
chr15:88669501-88680792	-	chr15:88669501	83	3	12	0.144578	0.040075
chr15:88669501-88690634	-	chr15:88669501	83	4	8	0.096386	0.0267167
chr15:88669501-88671965	-	chr15:88669501	83	5	5	0.060241	0.0166979
chr15:89656955-89659752	+	chr15:89659752	83	1	77	0.927711	0.257148
chr15:89656962-89659752	+	chr15:89659752	83	2	6	0.072289	0.0200375
chr15:89656955-89698765	+	chr15:89698765	47	1	21	0.446809	0.0701313
chr15:89694907-89698765	+	chr15:89698765	47	2	17	0.361702	0.056773
chr15:89698597-89698765	+	chr15:89698765	47	3	9	0.191489	0.0300563
chr15:89806649-89828449	+	chr15:89828449	5	1	4	0.8	0.0133583
chr15:89790859-89828449	+	chr15:89828449	5	2	1	0.2	0.00333959
chr1:58992932-59000003	-	chr1:58992932	3	1	2	0.666667	0.00667917
chr1:58992932-59002413	-	chr1:58992932	3	2	1	0.333333	0.00333959
chr15:90127516-90129173	+	chr15:90129173	5	1	2	0.4	0.00667917
chr15:90127519-90129173	+	chr15:90129173	5	2	2	0.4	0.00667917
chr15:90125916-90129173	+	chr15:90129173	5	3	1	0.2	0.00333959
chr15:90760670-90764997	+	chr15:90764997	83	1	73	0.879518	0.24379
chr15:90763024-90764997	+	chr15:90764997	83	2	10	0.120482	0.0333959
chr15:90982563-90986710	+	chr15:90986710	17	1	13	0.764706	0.0434146
chr15:90984737-90986710	+	chr15:90986710	17	2	4	0.235294	0.0133583
chr15:90982563-90999547	+	chr15:90999547	7	1	6	0.857143	0.0200375
chr15:90991804-90999547	+	chr15:90999547	7	2	1	0.142857	0.00333959
chr15:93496586-93499879	+	chr15:93499879	11	1	6	0.545455	0.0200375
chr15:93467550-93499879	+	chr15:93499879	11	2	5	0.454545	0.0166979
chr15:93496586-93510743	+	chr15:93510743	5	1	4	0.8	0.0133583
chr15:93489050-93510743	+	chr15:93510743	5	2	1	0.2	0.00333959
chr15:93557925-93558139	+	chr15:93558139	34	1	22	0.647059	0.0734709
chr15:93543741-93558139	+	chr15:93558139	34	2	6	0.176471	0.0200375
chr15:93547846-93558139	+	chr15:93558139	34	3	5	0.147059	0.0166979
chr15:93555574-93558139	+	chr15:93558139	34	4	1	0.029412	0.00333959
chr1:5964676-5965840	-	chr1:5964676	2	1	1	0.5	0.00333959
chr1:5964676-6046387	-	chr1:5964676	2	2	1	0.5	0.00333959
chr1:59787207-59812070	+	chr1:59812070	15	1	11	0.733333	0.0367354
chr1:59805629-59812070	+	chr1:59812070	15	2	4	0.266667	0.0133583
chr1:5987708-5993389	-	chr1:5987708	15	1	11	0.733333	0.0367354
chr1:5987708-6022009	-	chr1:5987708	15	2	2	0.133333	0.00667917
chr1:5987708-6008311	-	chr1:5987708	15	3	1	0.066667	0.00333959
chr1:5987708-6012896	-	chr1:5987708	15	4	1	0.066667	0.00333959
chr15:99250790-99442850	+	chr15:99442850	30	1	17	0.566667	0.056773
chr15:99439985-99442850	+	chr15:99442850	30	2	8	0.266667	0.0267167
chr15:99434553-99442850	+	chr15:99442850	30	3	5	0.166667	0.0166979
chr15:99827461-99828156	+	chr15:99828156	5	1	4	0.8	0.0133583
chr15:99816780-99828156	+	chr15:99828156	5	2	1	0.2	0.00333959
chr1:6007163-6022009	-	chr1:6007163	30	1	26	0.866667	0.0868292
chr1:6007163-6046387	-	chr1:6007163	30	2	3	0.1	0.0100188
chr1:6007163-6029319	-	chr1:6007163	30	3	1	0.033333	0.00333959
chr16:11114049-11154879	+	chr16:11154879	44	1	40	0.909091	0.133583
chr16:11118677-11154879	+	chr16:11154879	44	2	4	0.090909	0.0133583
chr16:11114049-11220003	+	chr16:11220003	23	1	14	0.608696	0.0467542
chr16:11214471-11220003	+	chr16:11220003	23	2	9	0.391304	0.0300563
chr16:11815432-11830089	-	chr16:11815432	5	1	3	0.6	0.0100188
chr16:11815432-11824630	-	chr16:11815432	5	2	2	0.4	0.00667917
chr16:11857333-11859541	-	chr16:11857333	6	1	5	0.833333	0.0166979
chr16:11857333-11857515	-	chr16:11857333	6	2	1	0.166667	0.00333959
chr16:11976871-11979131	-	chr16:11976871	10	1	9	0.9	0.0300563
chr16:11976871-11991892	-	chr16:11976871	10	2	1	0.1	0.00333959
chr16:1416018-1421612	-	chr16:1416018	10	1	9	0.9	0.0300563
chr16:1416018-1420358	-	chr16:1416018	10	2	1	0.1	0.00333959
chr16:14645877-14649566	-	chr16:14645877	23	1	18	0.782609	0.0601125
chr16:14645877-14687235	-	chr16:14645877	23	2	4	0.173913	0.0133583
chr16:14645877-14648008	-	chr16:14645877	23	3	1	0.043478	0.00333959
chr16:14674730-14678648	-	chr16:14674730	3	1	2	0.666667	0.00667917
chr16:14674730-14698083	-	chr16:14674730	3	2	1	0.333333	0.00333959
chr16:14680174-14687235	-	chr16:14680174	8	1	3	0.375	0.0100188
chr16:14680174-14721193	-	chr16:14680174	8	2	3	0.375	0.0100188
chr16:14680174-14698083	-	chr16:14680174	8	3	2	0.25	0.00667917
chr16:15102635-15112822	+	chr16:15112822	6	1	5	0.833333	0.0166979
chr16:15109985-15112822	+	chr16:15112822	6	2	1	0.166667	0.00333959
chr16:15168579-15178562	-	chr16:15168579	5	1	3	0.6	0.0100188
chr16:15168579-15170507	-	chr16:15168579	5	2	2	0.4	0.00667917
chr16:15771657-15790717	+	chr16:15790717	5	1	3	0.6	0.0100188
chr16:15788021-15790717	+	chr16:15790717	5	2	2	0.4	0.00667917
chr16:16101672-16108485	+	chr16:16108485	24	1	23	0.958333	0.0768105
chr16:16103632-16108485	+	chr16:16108485	24	2	1	0.041667	0.00333959
chr16:16101672-16110478	+	chr16:16110478	135	1	103	0.762963	0.343977
chr16:16103632-16110478	+	chr16:16110478	135	2	16	0.118519	0.0534334
chr16:16108347-16110478	+	chr16:16110478	135	3	15	0.111111	0.0500938
chr16:16110352-16110478	+	chr16:16110478	135	4	1	0.007407	0.00333959
chr16:16110352-16127027	+	chr16:16127027	13	1	8	0.615385	0.0267167
chr16:16108347-16127027	+	chr16:16127027	13	2	5	0.384615	0.0166979
chr16:16126965-16130460	+	chr16:16130460	32	1	25	0.78125	0.0834896
chr16:16101672-16130460	+	chr16:16130460	32	2	4	0.125	0.0133583
chr16:16108347-16130460	+	chr16:16130460	32	3	2	0.0625	0.00667917
chr16:16110352-16130460	+	chr16:16130460	32	4	1	0.03125	0.00333959
chr16:16108347-16142160	+	chr16:16142160	6	1	3	0.5	0.0100188
chr16:16141998-16142160	+	chr16:16142160	6	2	2	0.333333	0.00667917
chr16:16101672-16142160	+	chr16:16142160	6	3	1	0.166667	0.00333959
[truncated: 4,026 more rows]

## Sheet: HeLa_S3_A5BS
Chrom:Start-End	Strand	Common 3' back-splice site	Total junction reads of common 3' back-splice site	Index of alternative 5' back-splice site	Junction reads of this alternative 5' back-splice site	PCU (alternative 5' back-splice site)	RPM (junction reads of circRNA)
chr10:101590063-101594292	+	chr10:101590063	19	1	8	0.421053	0.0287364
chr10:101590063-101591888	+	chr10:101590063	19	2	6	0.315789	0.0215523
chr10:101590063-101606884	+	chr10:101590063	19	3	4	0.210526	0.0143682
chr10:101590063-101596047	+	chr10:101590063	19	4	1	0.052632	0.00359205
chr10:101591367-101606884	+	chr10:101591367	18	1	11	0.611111	0.0395125
chr10:101591367-101601850	+	chr10:101591367	18	2	5	0.277778	0.0179602
chr10:101591367-101594292	+	chr10:101591367	18	3	2	0.111111	0.00718409
chr10:102697158-102698493	+	chr10:102697158	5	1	3	0.6	0.0107761
chr10:102697158-102703885	+	chr10:102697158	5	2	2	0.4	0.00718409
chr10:103427642-103433430	-	chr10:103433430	7	1	5	0.714286	0.0179602
chr10:103432671-103433430	-	chr10:103433430	7	2	2	0.285714	0.00718409
chr10:103427642-103436193	-	chr10:103436193	161	1	132	0.819876	0.47415
chr10:103384501-103436193	-	chr10:103436193	161	2	18	0.111801	0.0646568
chr10:103432671-103436193	-	chr10:103436193	161	3	11	0.068323	0.0395125
chr10:103567486-103567658	-	chr10:103567658	17	1	8	0.470588	0.0287364
chr10:103552595-103567658	-	chr10:103567658	17	2	7	0.411765	0.0251443
chr10:103557736-103567658	-	chr10:103567658	17	3	2	0.117647	0.00718409
chr10:103699619-103717489	-	chr10:103717489	50	1	32	0.64	0.114945
chr10:103716353-103717489	-	chr10:103717489	50	2	15	0.3	0.0538807
chr10:103649168-103717489	-	chr10:103717489	50	3	3	0.06	0.0107761
chr10:104018685-104019873	+	chr10:104018685	11	1	6	0.545455	0.0215523
chr10:104018685-104103939	+	chr10:104018685	11	2	4	0.363636	0.0143682
chr10:104018685-104122421	+	chr10:104018685	11	3	1	0.090909	0.00359205
chr10:104853728-104854212	-	chr10:104854212	8	1	5	0.625	0.0179602
chr10:104851320-104854212	-	chr10:104854212	8	2	3	0.375	0.0107761
chr10:105371337-105420872	-	chr10:105420872	51	1	20	0.392157	0.0718409
chr10:105382226-105420872	-	chr10:105420872	51	2	19	0.372549	0.0682489
chr10:105386845-105420872	-	chr10:105420872	51	3	7	0.137255	0.0251443
chr10:105376953-105420872	-	chr10:105420872	51	4	5	0.098039	0.0179602
chr10:1118055-1142186	+	chr10:1118055	70	1	51	0.728571	0.183194
chr10:1118055-1126416	+	chr10:1118055	70	2	14	0.2	0.0502886
chr10:1118055-1151207	+	chr10:1118055	70	3	5	0.071429	0.0179602
chr10:111883774-111890244	+	chr10:111883774	4	1	3	0.75	0.0107761
chr10:111883774-111886261	+	chr10:111883774	4	2	1	0.25	0.00359205
chr10:1123846-1132297	+	chr10:1123846	10	1	5	0.5	0.0179602
chr10:1123846-1142186	+	chr10:1123846	10	2	5	0.5	0.0179602
chr10:112723882-112745523	+	chr10:112723882	94	1	86	0.914894	0.308916
chr10:112723882-112724819	+	chr10:112723882	94	2	8	0.085106	0.0287364
chr10:1130342-1142186	+	chr10:1130342	319	1	247	0.774295	0.887235
chr10:1130342-1151207	+	chr10:1130342	319	2	69	0.216301	0.247851
chr10:1130342-1170964	+	chr10:1130342	319	3	3	0.009404	0.0107761
chr10:114724314-114799885	+	chr10:114724314	21	1	20	0.952381	0.0718409
chr10:114724314-114849299	+	chr10:114724314	21	2	1	0.047619	0.00359205
chr10:116247716-116251637	-	chr10:116251637	32	1	30	0.9375	0.107761
chr10:116225456-116251637	-	chr10:116251637	32	2	2	0.0625	0.00718409
chr10:116590610-116593161	+	chr10:116590610	3	1	2	0.666667	0.00718409
chr10:116590610-116596005	+	chr10:116590610	3	2	1	0.333333	0.00359205
chr10:120488806-120489922	-	chr10:120489922	9	1	7	0.777778	0.0251443
chr10:120445494-120489922	-	chr10:120489922	9	2	2	0.222222	0.00718409
chr10:12021055-12056183	-	chr10:12056183	23	1	14	0.608696	0.0502886
chr10:12039670-12056183	-	chr10:12056183	23	2	9	0.391304	0.0323284
chr10:120820257-120833089	-	chr10:120833089	3	1	2	0.666667	0.00718409
chr10:120830397-120833089	-	chr10:120833089	3	2	1	0.333333	0.00359205
chr10:120931893-120934104	-	chr10:120934104	21	1	8	0.380952	0.0287364
chr10:120933248-120934104	-	chr10:120934104	21	2	8	0.380952	0.0287364
chr10:120928688-120934104	-	chr10:120934104	21	3	5	0.238095	0.0179602
chr10:12123470-12136270	+	chr10:12123470	143	1	67	0.468531	0.240667
chr10:12123470-12133683	+	chr10:12123470	143	2	32	0.223776	0.114945
chr10:12123470-12162266	+	chr10:12123470	143	3	27	0.188811	0.0969852
chr10:12123470-12143180	+	chr10:12123470	143	4	9	0.062937	0.0323284
chr10:12123470-12148395	+	chr10:12123470	143	5	6	0.041958	0.0215523
chr10:12123470-12126750	+	chr10:12123470	143	6	2	0.013986	0.00718409
chr10:12257738-12259466	+	chr10:12257738	7	1	6	0.857143	0.0215523
chr10:12257738-12280484	+	chr10:12257738	7	2	1	0.142857	0.00359205
chr10:123629520-123683844	-	chr10:123683844	87	1	40	0.45977	0.143682
chr10:123600596-123683844	-	chr10:123683844	87	2	25	0.287356	0.0898011
chr10:123549683-123683844	-	chr10:123683844	87	3	16	0.183908	0.0574727
chr10:123681863-123683844	-	chr10:123683844	87	4	4	0.045977	0.0143682
chr10:123658355-123683844	-	chr10:123683844	87	5	2	0.022989	0.00718409
chr10:123892123-123903221	+	chr10:123892123	10	1	9	0.9	0.0323284
chr10:123892123-123892249	+	chr10:123892123	10	2	1	0.1	0.00359205
chr10:124151818-124172561	+	chr10:124151818	22	1	9	0.409091	0.0323284
chr10:124151818-124157490	+	chr10:124151818	22	2	8	0.363636	0.0287364
chr10:124151818-124177484	+	chr10:124151818	22	3	3	0.136364	0.0107761
chr10:124151818-124175518	+	chr10:124151818	22	4	2	0.090909	0.00718409
chr10:124342115-124344825	+	chr10:124342115	2	1	1	0.5	0.00359205
chr10:124342115-124352111	+	chr10:124342115	2	2	1	0.5	0.00359205
chr10:125798030-125806240	-	chr10:125806240	68	1	57	0.838235	0.204747
chr10:125771848-125806240	-	chr10:125806240	68	2	10	0.147059	0.0359205
chr10:125780771-125806240	-	chr10:125806240	68	3	1	0.014706	0.00359205
chr10:126370175-126395456	-	chr10:126395456	95	1	46	0.484211	0.165234
chr10:126395204-126395456	-	chr10:126395456	95	2	40	0.421053	0.143682
chr10:126384726-126395456	-	chr10:126395456	95	3	9	0.094737	0.0323284
chr10:126631025-126655350	+	chr10:126631025	100	1	35	0.35	0.125722
chr10:126631025-126631876	+	chr10:126631025	100	2	34	0.34	0.12213
chr10:126631025-126650977	+	chr10:126631025	100	3	31	0.31	0.111353
chr10:126776759-126799662	-	chr10:126799662	9	1	5	0.555556	0.0179602
chr10:126727565-126799662	-	chr10:126799662	9	2	4	0.444444	0.0143682
chr10:128768965-128798571	+	chr10:128768965	15	1	11	0.733333	0.0395125
chr10:128768965-128788867	+	chr10:128768965	15	2	3	0.2	0.0107761
chr10:128768965-128810638	+	chr10:128768965	15	3	1	0.066667	0.00359205
chr10:128904494-128908618	+	chr10:128904494	5	1	3	0.6	0.0107761
chr10:128904494-128926028	+	chr10:128904494	5	2	2	0.4	0.00718409
chr10:13214375-13214765	+	chr10:13214375	12	1	11	0.916667	0.0395125
chr10:13214375-13217681	+	chr10:13214375	12	2	1	0.083333	0.00359205
chr10:13330359-13337606	-	chr10:13337606	4	1	3	0.75	0.0107761
chr10:13333830-13337606	-	chr10:13337606	4	2	1	0.25	0.00359205
chr10:133784141-133787447	-	chr10:133787447	8	1	7	0.875	0.0251443
chr10:133786537-133787447	-	chr10:133787447	8	2	1	0.125	0.00359205
chr10:13375816-13387028	-	chr10:13387028	3	1	2	0.666667	0.00718409
chr10:13370350-13387028	-	chr10:13387028	3	2	1	0.333333	0.00359205
chr10:135209216-135216277	+	chr10:135209216	21	1	17	0.809524	0.0610648
chr10:135209216-135215749	+	chr10:135209216	21	2	3	0.142857	0.0107761
chr10:135209216-135213123	+	chr10:135209216	21	3	1	0.047619	0.00359205
chr10:15317853-15326104	-	chr10:15326104	27	1	25	0.925926	0.0898011
chr10:15325876-15326104	-	chr10:15326104	27	2	2	0.074074	0.00718409
chr10:19546612-19572110	+	chr10:19546612	89	1	43	0.483146	0.154458
chr10:19546612-19620511	+	chr10:19546612	89	2	38	0.426966	0.136498
chr10:19546612-19678538	+	chr10:19546612	89	3	8	0.089888	0.0287364
chr10:21970260-22002879	+	chr10:21970260	7	1	6	0.857143	0.0215523
chr10:21970260-21971186	+	chr10:21970260	7	2	1	0.142857	0.00359205
chr10:22002700-22016857	+	chr10:22002700	45	1	40	0.888889	0.143682
chr10:22002700-22024164	+	chr10:22002700	45	2	5	0.111111	0.0179602
chr10:27458872-27462188	+	chr10:27458872	15	1	9	0.6	0.0323284
chr10:27458872-27470510	+	chr10:27458872	15	2	4	0.266667	0.0143682
chr10:27458872-27460012	+	chr10:27458872	15	3	2	0.133333	0.00718409
chr10:28872327-28884970	+	chr10:28872327	10	1	6	0.6	0.0215523
chr10:28872327-28879761	+	chr10:28872327	10	2	3	0.3	0.0107761
chr10:28872327-28872434	+	chr10:28872327	10	3	1	0.1	0.00359205
chr10:31661946-31676195	+	chr10:31661946	13	1	11	0.846154	0.0395125
chr10:31661946-31810864	+	chr10:31661946	13	2	2	0.153846	0.00718409
chr10:34985245-34985347	-	chr10:34985347	6	1	4	0.666667	0.0143682
chr10:34805906-34985347	-	chr10:34985347	6	2	2	0.333333	0.00718409
chr10:35805450-35819171	+	chr10:35805450	48	1	42	0.875	0.150866
chr10:35805450-35814927	+	chr10:35805450	48	2	6	0.125	0.0215523
chr10:45954567-45959775	-	chr10:45959775	17	1	16	0.941176	0.0574727
chr10:45958598-45959775	-	chr10:45959775	17	2	1	0.058824	0.00359205
chr10:50701162-50714058	-	chr10:50714058	9	1	6	0.666667	0.0215523
chr10:50708583-50714058	-	chr10:50714058	9	2	3	0.333333	0.0107761
chr10:51582182-51585599	+	chr10:51582182	4	1	3	0.75	0.0107761
chr10:51582182-51582939	+	chr10:51582182	4	2	1	0.25	0.00359205
chr10:52193235-52350007	-	chr10:52350007	2	1	1	0.5	0.00359205
chr10:52220432-52350007	-	chr10:52350007	2	2	1	0.5	0.00359205
chr10:5944982-5951257	+	chr10:5944982	19	1	9	0.473684	0.0323284
chr10:5944982-5969504	+	chr10:5944982	19	2	8	0.421053	0.0287364
chr10:5944982-5953091	+	chr10:5944982	19	3	2	0.105263	0.00718409
chr10:69748419-69773943	-	chr10:69773943	8	1	6	0.75	0.0215523
chr10:69714351-69773943	-	chr10:69773943	8	2	2	0.25	0.00718409
chr10:69785302-69804320	-	chr10:69804320	57	1	51	0.894737	0.183194
chr10:69749967-69804320	-	chr10:69804320	57	2	3	0.052632	0.0107761
chr10:69747799-69804320	-	chr10:69804320	57	3	2	0.035088	0.00718409
chr10:69751955-69804320	-	chr10:69804320	57	4	1	0.017544	0.00359205
chr10:69902696-69909868	+	chr10:69902696	29	1	26	0.896552	0.0933932
chr10:69902696-69934413	+	chr10:69902696	29	2	2	0.068966	0.00718409
chr10:69902696-69918384	+	chr10:69902696	29	3	1	0.034483	0.00359205
chr10:70252888-70253327	-	chr10:70253327	7	1	5	0.714286	0.0179602
chr10:70246900-70253327	-	chr10:70253327	7	2	2	0.285714	0.00718409
chr10:70482211-70502326	+	chr10:70482211	3	1	2	0.666667	0.00718409
chr10:70482211-70515293	+	chr10:70482211	3	2	1	0.333333	0.00359205
chr10:70496632-70496805	+	chr10:70496632	9	1	6	0.666667	0.0215523
chr10:70496632-70497646	+	chr10:70496632	9	2	3	0.333333	0.0107761
chr10:70497601-70502326	+	chr10:70497601	49	1	47	0.959184	0.168826
chr10:70497601-70500418	+	chr10:70497601	49	2	2	0.040816	0.00718409
chr10:70506917-70507323	+	chr10:70506917	10	1	8	0.8	0.0287364
chr10:70506917-70514584	+	chr10:70506917	10	2	2	0.2	0.00718409
chr10:71243446-71244971	+	chr10:71243446	29	1	23	0.793103	0.082617
chr10:71243446-71258152	+	chr10:71243446	29	2	6	0.206897	0.0215523
chr10:7318853-7327916	-	chr10:7327916	138	1	62	0.449275	0.222707
chr10:7285519-7327916	-	chr10:7327916	138	2	59	0.427536	0.211931
chr10:7262372-7327916	-	chr10:7327916	138	3	8	0.057971	0.0287364
chr10:7239509-7327916	-	chr10:7327916	138	4	6	0.043478	0.0215523
chr10:7230585-7327916	-	chr10:7327916	138	5	2	0.014493	0.00718409
chr10:7269816-7327916	-	chr10:7327916	138	6	1	0.007246	0.00359205
chr10:7409610-7423911	-	chr10:7423911	33	1	29	0.878788	0.104169
chr10:7325865-7423911	-	chr10:7423911	33	2	2	0.060606	0.00718409
chr10:7405839-7423911	-	chr10:7423911	33	3	2	0.060606	0.00718409
chr10:75296026-75299351	-	chr10:75299351	32	1	30	0.9375	0.107761
chr10:75286404-75299351	-	chr10:75299351	32	2	2	0.0625	0.00718409
chr10:75302560-75302889	-	chr10:75302889	14	1	13	0.928571	0.0466966
chr10:75301132-75302889	-	chr10:75302889	14	2	1	0.071429	0.00359205
chr10:75302775-75335433	-	chr10:75335433	4	1	3	0.75	0.0107761
chr10:75296026-75335433	-	chr10:75335433	4	2	1	0.25	0.00359205
chr10:75830427-75832610	+	chr10:75830427	28	1	9	0.321429	0.0323284
chr10:75830427-75834661	+	chr10:75830427	28	2	6	0.214286	0.0215523
chr10:75830427-75860855	+	chr10:75830427	28	3	6	0.214286	0.0215523
chr10:75830427-75854219	+	chr10:75830427	28	4	4	0.142857	0.0143682
chr10:75830427-75855613	+	chr10:75830427	28	5	3	0.107143	0.0107761
chr10:80878671-80921890	+	chr10:80878671	12	1	8	0.666667	0.0287364
chr10:80878671-80976031	+	chr10:80878671	12	2	3	0.25	0.0107761
chr10:80878671-80899534	+	chr10:80878671	12	3	1	0.083333	0.00359205
chr10:82228302-82249070	+	chr10:82228302	36	1	30	0.833333	0.107761
chr10:82228302-82228443	+	chr10:82228302	36	2	6	0.166667	0.0215523
chr10:86177526-86185649	+	chr10:86177526	90	1	75	0.833333	0.269403
chr10:86177526-86198463	+	chr10:86177526	90	2	15	0.166667	0.0538807
chr10:88817447-88822592	-	chr10:88822592	4	1	2	0.5	0.00718409
chr10:88818906-88822592	-	chr10:88822592	4	2	2	0.5	0.00718409
chr10:89530708-89536184	-	chr10:89536184	10	1	6	0.6	0.0215523
chr10:89527429-89536184	-	chr10:89536184	10	2	3	0.3	0.0107761
chr10:89516545-89536184	-	chr10:89536184	10	3	1	0.1	0.00359205
chr10:89624210-89653866	+	chr10:89624210	22	1	13	0.590909	0.0466966
chr10:89624210-89693008	+	chr10:89624210	22	2	4	0.181818	0.0143682
chr10:89624210-89685314	+	chr10:89624210	22	3	3	0.136364	0.0107761
chr10:89624210-89712016	+	chr10:89624210	22	4	2	0.090909	0.00718409
chr10:909682-931700	-	chr10:931700	197	1	82	0.416244	0.294548
chr10:930386-931700	-	chr10:931700	197	2	82	0.416244	0.294548
chr10:888871-931700	-	chr10:931700	197	3	25	0.126904	0.0898011
chr10:875324-931700	-	chr10:931700	197	4	6	0.030457	0.0215523
chr10:860681-931700	-	chr10:931700	197	5	2	0.010152	0.00718409
chr10:93185037-93221941	+	chr10:93185037	37	1	33	0.891892	0.118537
chr10:93185037-93185167	+	chr10:93185037	37	2	4	0.108108	0.0143682
chr10:93608139-93611093	+	chr10:93608139	9	1	8	0.888889	0.0287364
chr10:93608139-93609351	+	chr10:93608139	9	2	1	0.111111	0.00359205
chr10:93754291-93757508	+	chr10:93754291	7	1	4	0.571429	0.0143682
chr10:93754291-93768032	+	chr10:93754291	7	2	3	0.428571	0.0107761
chr10:93756125-93757508	+	chr10:93756125	51	1	47	0.921569	0.168826
chr10:93756125-93768032	+	chr10:93756125	51	2	4	0.078431	0.0143682
chr10:94653105-94654777	+	chr10:94653105	3	1	1	0.333333	0.00359205
chr10:94653105-94715471	+	chr10:94653105	3	2	1	0.333333	0.00359205
chr10:94653105-94774024	+	chr10:94653105	3	3	1	0.333333	0.00359205
chr10:95140975-95148911	-	chr10:95148911	23	1	21	0.913043	0.075433
chr10:95139619-95148911	-	chr10:95148911	23	2	2	0.086957	0.00718409
chr10:97098889-97170534	-	chr10:97170534	6	1	4	0.666667	0.0143682
chr10:97127406-97170534	-	chr10:97170534	6	2	2	0.333333	0.00718409
chr10:97402748-97413162	-	chr10:97413162	10	1	9	0.9	0.0323284
chr10:97396849-97413162	-	chr10:97413162	10	2	1	0.1	0.00359205
chr10:99220451-99228163	-	chr10:99228163	13	1	11	0.846154	0.0395125
chr10:99227261-99228163	-	chr10:99228163	13	2	2	0.153846	0.00718409
chr10:99236439-99238146	-	chr10:99238146	13	1	12	0.923077	0.0431045
chr10:99230531-99238146	-	chr10:99238146	13	2	1	0.076923	0.00359205
chr10:99416041-99416731	+	chr10:99416041	13	1	8	0.615385	0.0287364
chr10:99416041-99422725	+	chr10:99416041	13	2	5	0.384615	0.0179602
chr1:100515464-100535241	+	chr1:100515464	10	1	7	0.7	0.0251443
chr1:100515464-100534142	+	chr1:100515464	10	2	2	0.2	0.00718409
chr1:100515464-100546215	+	chr1:100515464	10	3	1	0.1	0.00359205
chr1:101372407-101379362	+	chr1:101372407	69	1	46	0.666667	0.165234
chr1:101372407-101387397	+	chr1:101372407	69	2	23	0.333333	0.082617
chr1:101379218-101387397	+	chr1:101379218	45	1	39	0.866667	0.14009
chr1:101379218-101440458	+	chr1:101379218	45	2	5	0.111111	0.0179602
chr1:101379218-101383683	+	chr1:101379218	45	3	1	0.022222	0.00359205
chr1:10177516-10179671	+	chr1:10177516	2	1	1	0.5	0.00359205
chr1:10177516-10182134	+	chr1:10177516	2	2	1	0.5	0.00359205
chr11:10049998-10064528	-	chr11:10064528	12	1	6	0.5	0.0215523
chr11:9983503-10064528	-	chr11:10064528	12	2	6	0.5	0.0215523
chr11:101984874-102033302	+	chr11:101984874	8	1	3	0.375	0.0107761
chr11:101984874-102076805	+	chr11:101984874	8	2	3	0.375	0.0107761
chr11:101984874-102094483	+	chr11:101984874	8	3	2	0.25	0.00718409
chr11:102056748-102076805	+	chr11:102056748	13	1	12	0.923077	0.0431045
chr11:102056748-102076817	+	chr11:102056748	13	2	1	0.076923	0.00359205
chr11:102076623-102080295	+	chr11:102076623	39	1	28	0.717949	0.100577
chr11:102076623-102094483	+	chr11:102076623	39	2	11	0.282051	0.0395125
chr1:110551655-110553979	+	chr1:110551655	9	1	6	0.666667	0.0215523
chr1:110551655-110557479	+	chr1:110551655	9	2	2	0.222222	0.00718409
chr1:110551655-110559082	+	chr1:110551655	9	3	1	0.111111	0.00359205
chr11:108002633-108005043	+	chr11:108002633	7	1	5	0.714286	0.0179602
chr11:108002633-108013277	+	chr11:108002633	7	2	2	0.285714	0.00718409
chr11:111706887-111709101	-	chr11:111709101	4	1	3	0.75	0.0107761
chr11:111680366-111709101	-	chr11:111709101	4	2	1	0.25	0.00359205
chr1:11130956-11137005	-	chr1:11137005	17	1	15	0.882353	0.0538807
chr1:11133990-11137005	-	chr1:11137005	17	2	2	0.117647	0.00718409
chr1:11137386-11137708	-	chr1:11137708	4	1	3	0.75	0.0107761
chr1:11133990-11137708	-	chr1:11137708	4	2	1	0.25	0.00359205
chr1:111668848-111680208	-	chr1:111680208	2	1	1	0.5	0.00359205
chr1:111674045-111680208	-	chr1:111680208	2	2	1	0.5	0.00359205
chr11:120916382-120930794	+	chr11:120916382	9	1	6	0.666667	0.0215523
chr11:120916382-120924441	+	chr11:120916382	9	2	3	0.333333	0.0107761
chr11:123464789-123465546	+	chr11:123464789	7	1	6	0.857143	0.0215523
chr11:123464789-123466745	+	chr11:123464789	7	2	1	0.142857	0.00359205
chr11:126275990-126279306	+	chr11:126275990	11	1	10	0.909091	0.0359205
chr11:126275990-126283543	+	chr11:126275990	11	2	1	0.090909	0.00359205
chr11:128993340-129034322	-	chr11:129034322	13	1	11	0.846154	0.0395125
chr11:129034213-129034322	-	chr11:129034322	13	2	2	0.153846	0.00718409
chr11:129979323-130011969	+	chr11:129979323	6	1	4	0.666667	0.0143682
chr11:129979323-129992408	+	chr11:129979323	6	2	2	0.333333	0.00718409
chr1:113119607-113140708	-	chr1:113140708	3	1	2	0.666667	0.00718409
chr1:113134146-113140708	-	chr1:113140708	3	2	1	0.333333	0.00359205
chr1:113140592-113153625	-	chr1:113153625	3	1	2	0.666667	0.00718409
chr1:113084572-113153625	-	chr1:113153625	3	2	1	0.333333	0.00359205
chr1:113140592-113159517	-	chr1:113159517	9	1	7	0.777778	0.0251443
chr1:113134146-113159517	-	chr1:113159517	9	2	1	0.111111	0.00359205
chr1:113153462-113159517	-	chr1:113159517	9	3	1	0.111111	0.00359205
chr11:1307231-1317024	-	chr11:1317024	54	1	46	0.851852	0.165234
chr11:1309853-1317024	-	chr11:1317024	54	2	8	0.148148	0.0287364
chr1:113196219-113202401	+	chr1:113196219	20	1	13	0.65	0.0466966
chr1:113196219-113209767	+	chr1:113196219	20	2	7	0.35	0.0251443
chr1:113464611-113471974	-	chr1:113471974	5	1	4	0.8	0.0143682
chr1:113471713-113471974	-	chr1:113471974	5	2	1	0.2	0.00359205
chr1:113655100-113657498	+	chr1:113655100	12	1	9	0.75	0.0323284
chr1:113655100-113662145	+	chr1:113655100	12	2	3	0.25	0.0107761
chr11:14793482-14810788	+	chr11:14793482	15	1	14	0.933333	0.0502886
chr11:14793482-14825596	+	chr11:14793482	15	2	1	0.066667	0.00359205
chr1:11736102-11736197	-	chr1:11736197	3	1	2	0.666667	0.00718409
chr1:11735714-11736197	-	chr1:11736197	3	2	1	0.333333	0.00359205
chr1:117944807-117963271	+	chr1:117944807	65	1	42	0.646154	0.150866
chr1:117944807-117984947	+	chr1:117944807	65	2	14	0.215385	0.0502886
chr1:117944807-117957453	+	chr1:117944807	65	3	9	0.138462	0.0323284
chr11:17899754-18029623	-	chr11:18029623	20	1	11	0.55	0.0395125
chr11:17981016-18029623	-	chr11:18029623	20	2	5	0.25	0.0179602
chr11:18010143-18029623	-	chr11:18029623	20	3	4	0.2	0.0143682
chr11:18596893-18600355	-	chr11:18600355	3	1	2	0.666667	0.00718409
chr11:18591760-18600355	-	chr11:18600355	3	2	1	0.333333	0.00359205
chr1:1192371-1203372	-	chr1:1203372	26	1	12	0.461538	0.0431045
chr1:1191424-1203372	-	chr1:1203372	26	2	9	0.346154	0.0323284
chr1:1197648-1203372	-	chr1:1203372	26	3	5	0.192308	0.0179602
chr1:120572528-120594393	-	chr1:120594393	7	1	4	0.571429	0.0143682
chr1:120539619-120594393	-	chr1:120594393	7	2	3	0.428571	0.0107761
chr1:12061457-12062160	+	chr1:12061457	12	1	10	0.833333	0.0359205
chr1:12061457-12069783	+	chr1:12061457	12	2	2	0.166667	0.00718409
chr11:22696395-22777499	+	chr11:22696395	7	1	5	0.714286	0.0179602
chr11:22696395-22747979	+	chr11:22696395	7	2	2	0.285714	0.00718409
chr1:12382592-12387911	+	chr1:12382592	3	1	2	0.666667	0.00718409
chr1:12382592-12389975	+	chr1:12382592	3	2	1	0.333333	0.00359205
chr1:12638745-12639440	-	chr1:12639440	190	1	186	0.978947	0.66812
chr1:12632755-12639440	-	chr1:12639440	190	2	4	0.021053	0.0143682
chr11:27393161-27414065	-	chr11:27414065	5	1	4	0.8	0.0143682
chr11:27412640-27414065	-	chr11:27414065	5	2	1	0.2	0.00359205
chr11:2997253-3000467	-	chr11:3000467	29	1	15	0.517241	0.0538807
chr11:2972488-3000467	-	chr11:3000467	29	2	9	0.310345	0.0323284
chr11:2991032-3000467	-	chr11:3000467	29	3	5	0.172414	0.0179602
chr11:3033424-3041562	-	chr11:3041562	5	1	3	0.6	0.0107761
chr11:3039637-3041562	-	chr11:3041562	5	2	2	0.4	0.00718409
chr11:3033424-3063486	-	chr11:3063486	2	1	1	0.5	0.00359205
chr11:3050532-3063486	-	chr11:3063486	2	2	1	0.5	0.00359205
chr11:3037010-3069231	-	chr11:3069231	2	1	1	0.5	0.00359205
chr11:3059279-3069231	-	chr11:3069231	2	2	1	0.5	0.00359205
chr11:3121387-3147785	-	chr11:3147785	9	1	6	0.666667	0.0215523
chr11:3115466-3147785	-	chr11:3147785	9	2	2	0.222222	0.00718409
chr11:3140776-3147785	-	chr11:3147785	9	3	1	0.111111	0.00359205
chr11:32948702-32956981	+	chr11:32948702	66	1	60	0.909091	0.215523
chr11:32948702-32979632	+	chr11:32948702	66	2	6	0.090909	0.0215523
chr11:33307958-33309057	+	chr11:33307958	742	1	739	0.995957	2.65452
chr11:33307958-33350179	+	chr11:33307958	742	2	3	0.004043	0.0107761
chr11:34101174-34112225	+	chr11:34101174	7	1	4	0.571429	0.0143682
chr11:34101174-34107960	+	chr11:34101174	7	2	3	0.428571	0.0107761
chr11:34110941-34112225	+	chr11:34110941	29	1	25	0.862069	0.0898011
chr11:34110941-34113603	+	chr11:34110941	29	2	4	0.137931	0.0143682
chr11:34129757-34149146	+	chr11:34129757	5	1	4	0.8	0.0143682
chr11:34129757-34145947	+	chr11:34129757	5	2	1	0.2	0.00359205
chr11:34474636-34478364	+	chr11:34474636	4	1	3	0.75	0.0107761
chr11:34474636-34474741	+	chr11:34474636	4	2	1	0.25	0.00359205
chr11:3712576-3716836	-	chr11:3716836	17	1	14	0.823529	0.0502886
chr11:3707202-3716836	-	chr11:3716836	17	2	3	0.176471	0.0107761
chr11:3752620-3774638	-	chr11:3774638	21	1	17	0.809524	0.0610648
chr11:3765738-3774638	-	chr11:3774638	21	2	4	0.190476	0.0143682
chr11:3792977-3797251	-	chr11:3797251	28	1	9	0.321429	0.0323284
chr11:3784131-3797251	-	chr11:3797251	28	2	6	0.214286	0.0215523
chr11:3789810-3797251	-	chr11:3797251	28	3	5	0.178571	0.0179602
chr11:3794861-3797251	-	chr11:3797251	28	4	4	0.142857	0.0143682
chr11:3774545-3797251	-	chr11:3797251	28	5	3	0.107143	0.0107761
chr11:3781717-3797251	-	chr11:3797251	28	6	1	0.035714	0.00359205
chr11:4076755-4080626	+	chr11:4076755	8	1	4	0.5	0.0143682
chr11:4076755-4107773	+	chr11:4076755	8	2	4	0.5	0.0143682
chr1:1424583-1426051	+	chr1:1424583	6	1	4	0.666667	0.0143682
chr1:1424583-1464711	+	chr1:1424583	6	2	2	0.333333	0.00718409
chr11:43425547-43429127	+	chr11:43425547	19	1	17	0.894737	0.0610648
chr11:43425547-43457884	+	chr11:43425547	19	2	2	0.105263	0.00718409
chr11:44129232-44151688	+	chr11:44129232	4	1	2	0.5	0.00718409
chr11:44129232-44135851	+	chr11:44129232	4	2	1	0.25	0.00359205
chr11:44129232-44193292	+	chr11:44129232	4	3	1	0.25	0.00359205
chr1:145227040-145248894	+	chr1:145227040	8	1	5	0.625	0.0179602
chr1:145227040-145281704	+	chr1:145227040	8	2	3	0.375	0.0107761
chr1:145646114-145687091	+	chr1:145646114	3	1	2	0.666667	0.00718409
chr1:145646114-145682094	+	chr1:145646114	3	2	1	0.333333	0.00359205
chr11:46388840-46389629	+	chr11:46388840	3	1	2	0.666667	0.00718409
chr11:46388840-46391559	+	chr11:46388840	3	2	1	0.333333	0.00359205
chr11:46515157-46529920	-	chr11:46529920	212	1	207	0.976415	0.743553
chr11:46529740-46529920	-	chr11:46529920	212	2	5	0.023585	0.0179602
chr11:46515157-46534363	-	chr11:46534363	200	1	168	0.84	0.603464
chr11:46529740-46534363	-	chr11:46534363	200	2	27	0.135	0.0969852
chr11:46515673-46534363	-	chr11:46534363	200	3	5	0.025	0.0179602
chr11:46515157-46570050	-	chr11:46570050	59	1	32	0.542373	0.114945
chr11:46563494-46570050	-	chr11:46570050	59	2	11	0.186441	0.0395125
chr11:46565524-46570050	-	chr11:46570050	59	3	7	0.118644	0.0251443
chr11:46465037-46570050	-	chr11:46570050	59	4	5	0.084746	0.0179602
chr11:46529740-46570050	-	chr11:46570050	59	5	2	0.033898	0.00718409
chr11:46568662-46570050	-	chr11:46570050	59	6	2	0.033898	0.00718409
chr1:146724277-146731572	+	chr1:146724277	10	1	9	0.9	0.0323284
chr1:146724277-146747921	+	chr1:146724277	10	2	1	0.1	0.00359205
chr11:46749545-46750387	+	chr11:46749545	18	1	14	0.777778	0.0502886
chr11:46749545-46760668	+	chr11:46749545	18	2	3	0.166667	0.0107761
chr11:46749545-46751111	+	chr11:46749545	18	3	1	0.055556	0.00359205
chr11:46958117-47074069	+	chr11:46958117	59	1	38	0.644068	0.136498
chr11:46958117-47008861	+	chr11:46958117	59	2	12	0.20339	0.0431045
chr11:46958117-47159280	+	chr11:46958117	59	3	8	0.135593	0.0287364
chr11:46958117-47182741	+	chr11:46958117	59	4	1	0.016949	0.00359205
chr1:147120047-147131890	-	chr1:147131890	10	1	6	0.6	0.0215523
chr1:147131074-147131890	-	chr1:147131890	10	2	4	0.4	0.0143682
chr11:47176726-47179473	+	chr11:47176726	6	1	3	0.5	0.0107761
chr11:47176726-47182741	+	chr11:47176726	6	2	3	0.5	0.0107761
chr11:47297449-47300630	+	chr11:47297449	2	1	1	0.5	0.00359205
chr11:47297449-47315534	+	chr11:47297449	2	2	1	0.5	0.00359205
chr11:47504246-47505084	-	chr11:47505084	9	1	5	0.555556	0.0179602
chr11:47496887-47505084	-	chr11:47505084	9	2	4	0.444444	0.0143682
chr11:47493742-47510576	-	chr11:47510576	19	1	6	0.315789	0.0215523
chr11:47505940-47510576	-	chr11:47510576	19	2	5	0.263158	0.0179602
chr11:47504246-47510576	-	chr11:47510576	19	3	4	0.210526	0.0143682
chr11:47508301-47510576	-	chr11:47510576	19	4	2	0.105263	0.00718409
chr11:47498848-47510576	-	chr11:47510576	19	5	1	0.052632	0.00359205
chr11:47500428-47510576	-	chr11:47510576	19	6	1	0.052632	0.00359205
chr11:47644252-47652639	-	chr11:47652639	13	1	8	0.615385	0.0287364
chr11:47650504-47652639	-	chr11:47652639	13	2	5	0.384615	0.0179602
chr11:47653205-47656286	-	chr11:47656286	20	1	16	0.8	0.0574727
chr11:47647225-47656286	-	chr11:47656286	20	2	4	0.2	0.0143682
chr11:47745579-47772842	-	chr11:47772842	5	1	2	0.4	0.00718409
chr11:47755576-47772842	-	chr11:47772842	5	2	2	0.4	0.00718409
chr11:47752925-47772842	-	chr11:47772842	5	3	1	0.2	0.00359205
chr1:150305154-150312953	+	chr1:150305154	3	1	2	0.666667	0.00718409
chr1:150305154-150307712	+	chr1:150305154	3	2	1	0.333333	0.00359205
chr1:150464886-150469384	+	chr1:150464886	39	1	29	0.74359	0.104169
chr1:150464886-150470223	+	chr1:150464886	39	2	8	0.205128	0.0287364
chr1:150464886-150469104	+	chr1:150464886	39	3	1	0.025641	0.00359205
chr1:150464886-150471769	+	chr1:150464886	39	4	1	0.025641	0.00359205
chr1:150997086-151001420	+	chr1:150997086	46	1	39	0.847826	0.14009
chr1:150997086-150998149	+	chr1:150997086	46	2	5	0.108696	0.0179602
chr1:150997086-150999803	+	chr1:150997086	46	3	2	0.043478	0.00718409
chr1:151062881-151079698	+	chr1:151062881	10	1	9	0.9	0.0323284
chr1:151062881-151070478	+	chr1:151062881	10	2	1	0.1	0.00359205
chr1:151206672-151209239	+	chr1:151206672	3	1	2	0.666667	0.00718409
chr1:151206672-151206972	+	chr1:151206672	3	2	1	0.333333	0.00359205
chr1:151288048-151288985	-	chr1:151288985	8	1	6	0.75	0.0215523
chr1:151274319-151288985	-	chr1:151288985	8	2	2	0.25	0.00718409
chr1:151395872-151414681	-	chr1:151414681	26	1	9	0.346154	0.0323284
chr1:151400298-151414681	-	chr1:151414681	26	2	8	0.307692	0.0287364
chr1:151413403-151414681	-	chr1:151414681	26	3	6	0.230769	0.0215523
chr1:151403141-151414681	-	chr1:151414681	26	4	2	0.076923	0.00718409
chr1:151400598-151414681	-	chr1:151414681	26	5	1	0.038462	0.00359205
chr1:151611363-151611595	+	chr1:151611363	44	1	24	0.545455	0.0862091
chr1:151611363-151641111	+	chr1:151611363	44	2	17	0.386364	0.0610648
chr1:151611363-151633338	+	chr1:151611363	44	3	3	0.068182	0.0107761
chr1:153701028-153730239	+	chr1:153701028	5	1	4	0.8	0.0143682
chr1:153701028-153719546	+	chr1:153701028	5	2	1	0.2	0.00359205
chr1:154560600-154560734	-	chr1:154560734	7	1	5	0.714286	0.0179602
chr1:154558656-154560734	-	chr1:154560734	7	2	2	0.285714	0.00718409
chr1:155348071-155385714	-	chr1:155385714	7	1	5	0.714286	0.0179602
chr1:155385534-155385714	-	chr1:155385714	7	2	2	0.285714	0.00718409
chr1:155644800-155649303	-	chr1:155649303	28	1	22	0.785714	0.079025
chr1:155646338-155649303	-	chr1:155649303	28	2	6	0.214286	0.0215523
chr1:155896466-155896947	-	chr1:155896947	10	1	8	0.8	0.0287364
chr1:155895422-155896947	-	chr1:155896947	10	2	2	0.2	0.00718409
chr1:156303337-156304709	-	chr1:156304709	201	1	195	0.970149	0.700449
chr1:156286956-156304709	-	chr1:156304709	201	2	3	0.014925	0.0107761
chr1:156294762-156304709	-	chr1:156304709	201	3	3	0.014925	0.0107761
chr11:57258696-57259335	-	chr11:57259335	140	1	139	0.992857	0.499294
chr11:57259188-57259335	-	chr11:57259335	140	2	1	0.007143	0.00359205
chr11:57268251-57268802	-	chr11:57268802	6	1	5	0.833333	0.0179602
chr11:57254567-57268802	-	chr11:57268802	6	2	1	0.166667	0.00359205
chr1:15953163-15964929	+	chr1:15953163	5	1	3	0.6	0.0107761
chr1:15953163-15970145	+	chr1:15953163	5	2	2	0.4	0.00718409
chr11:61034933-61036551	-	chr11:61036551	5	1	4	0.8	0.0143682
chr11:61031958-61036551	-	chr11:61036551	5	2	1	0.2	0.00359205
chr11:61039166-61044152	-	chr11:61044152	7	1	4	0.571429	0.0143682
chr11:61039146-61044152	-	chr11:61044152	7	2	3	0.428571	0.0107761
chr11:61071336-61079556	-	chr11:61079556	7	1	5	0.714286	0.0179602
chr11:61079255-61079556	-	chr11:61079556	7	2	2	0.285714	0.00718409
chr11:61079255-61081958	-	chr11:61081958	8	1	5	0.625	0.0179602
chr11:61076454-61081958	-	chr11:61081958	8	2	3	0.375	0.0107761
chr11:61096834-61097546	-	chr11:61097546	29	1	22	0.758621	0.079025
chr11:61093082-61097546	-	chr11:61097546	29	2	7	0.241379	0.0251443
chr11:61133516-61135470	+	chr11:61133516	203	1	180	0.8867	0.646568
chr11:61133516-61133688	+	chr11:61133516	203	2	23	0.1133	0.082617
chr11:61183137-61183991	-	chr11:61183991	3	1	2	0.666667	0.00718409
chr11:61178409-61183991	-	chr11:61183991	3	2	1	0.333333	0.00359205
chr11:61178409-61196762	-	chr11:61196762	8	1	7	0.875	0.0251443
chr11:61196653-61196762	-	chr11:61196762	8	2	1	0.125	0.00359205
chr11:61205096-61205585	+	chr11:61205096	58	1	52	0.896552	0.186786
chr11:61205096-61213703	+	chr11:61205096	58	2	6	0.103448	0.0215523
chr1:161293403-161298287	+	chr1:161293403	31	1	21	0.677419	0.075433
chr1:161293403-161310445	+	chr1:161293403	31	2	10	0.322581	0.0359205
chr11:61574135-61578547	-	chr11:61578547	22	1	21	0.954545	0.075433
chr11:61570272-61578547	-	chr11:61578547	22	2	1	0.045455	0.00359205
chr11:61579942-61580825	-	chr11:61580825	10	1	7	0.7	0.0251443
chr11:61570503-61580825	-	chr11:61580825	10	2	2	0.2	0.00718409
chr11:61571141-61580825	-	chr11:61580825	10	3	1	0.1	0.00359205
chr1:161748033-161753886	+	chr1:161748033	21	1	19	0.904762	0.0682489
chr1:161748033-161762117	+	chr1:161748033	21	2	2	0.095238	0.00718409
chr11:62406454-62407203	-	chr11:62407203	49	1	44	0.897959	0.15805
chr11:62400036-62407203	-	chr11:62407203	49	2	3	0.061224	0.0107761
chr11:62396240-62407203	-	chr11:62407203	49	3	2	0.040816	0.00718409
chr11:62621990-62622688	-	chr11:62622688	11	1	6	0.545455	0.0215523
chr11:62622359-62622688	-	chr11:62622688	11	2	5	0.454545	0.0179602
chr11:62649364-62655690	+	chr11:62649364	8	1	7	0.875	0.0251443
chr11:62649364-62653080	+	chr11:62649364	8	2	1	0.125	0.00359205
chr11:63517462-63517670	+	chr11:63517462	18	1	17	0.944444	0.0610648
chr11:63517462-63523642	+	chr11:63517462	18	2	1	0.055556	0.00359205
chr11:63960549-63962092	+	chr11:63960549	17	1	11	0.647059	0.0395125
chr11:63960549-63965446	+	chr11:63960549	17	2	6	0.352941	0.0215523
chr1:165859440-165860559	+	chr1:165859440	149	1	128	0.85906	0.459782
chr1:165859440-165865569	+	chr1:165859440	149	2	21	0.14094	0.075433
chr11:66133406-66137003	-	chr11:66137003	49	1	37	0.755102	0.132906
chr11:66136530-66137003	-	chr11:66137003	49	2	12	0.244898	0.0431045
chr11:66288740-66291353	+	chr11:66288740	22	1	13	0.590909	0.0466966
chr11:66288740-66294278	+	chr11:66288740	22	2	6	0.272727	0.0215523
chr11:66288740-66288847	+	chr11:66288740	22	3	3	0.136364	0.0107761
chr11:66407170-66407594	+	chr11:66407170	8	1	7	0.875	0.0251443
chr11:66407170-66411611	+	chr11:66407170	8	2	1	0.125	0.00359205
chr11:66589113-66595835	+	chr11:66589113	46	1	31	0.673913	0.111353
chr11:66589113-66590145	+	chr11:66589113	46	2	15	0.326087	0.0538807
chr1:167301706-167345392	+	chr1:167301706	2	1	1	0.5	0.00359205
chr1:167301706-167368602	+	chr1:167301706	2	2	1	0.5	0.00359205
chr11:67761146-67767150	-	chr11:67767150	4	1	2	0.5	0.00718409
chr11:67766988-67767150	-	chr11:67767150	4	2	2	0.5	0.00718409
chr1:167935866-167944253	+	chr1:167935866	15	1	14	0.933333	0.0502886
chr1:167935866-167974031	+	chr1:167935866	15	2	1	0.066667	0.00359205
chr11:68115314-68133170	+	chr11:68115314	74	1	39	0.527027	0.14009
chr11:68115314-68115711	+	chr11:68115314	74	2	17	0.22973	0.0610648
chr11:68115314-68125315	+	chr11:68115314	74	3	14	0.189189	0.0502886
chr11:68115314-68197168	+	chr11:68115314	74	4	4	0.054054	0.0143682
chr11:68190956-68193655	+	chr11:68190956	21	1	17	0.809524	0.0610648
chr11:68190956-68197168	+	chr11:68190956	21	2	4	0.190476	0.0143682
chr11:68272612-68305359	+	chr11:68272612	7	1	5	0.714286	0.0179602
chr11:68272612-68287119	+	chr11:68272612	7	2	1	0.142857	0.00359205
chr11:68272612-68315672	+	chr11:68272612	7	3	1	0.142857	0.00359205
chr11:68286968-68315672	+	chr11:68286968	4	1	2	0.5	0.00718409
chr11:68286968-68326147	+	chr11:68286968	4	2	2	0.5	0.00718409
chr11:68527036-68529155	-	chr11:68529155	49	1	32	0.653061	0.114945
chr11:68529002-68529155	-	chr11:68529155	49	2	9	0.183673	0.0323284
chr11:68527692-68529155	-	chr11:68529155	49	3	8	0.163265	0.0287364
chr11:68548107-68552478	-	chr11:68552478	28	1	18	0.642857	0.0646568
chr11:68552282-68552478	-	chr11:68552478	28	2	10	0.357143	0.0359205
chr11:68548107-68560870	-	chr11:68560870	17	1	14	0.823529	0.0502886
chr11:68527036-68560870	-	chr11:68560870	17	2	2	0.117647	0.00718409
chr11:68552282-68560870	-	chr11:68560870	17	3	1	0.058824	0.00359205
chr11:68560782-68564401	-	chr11:68564401	32	1	14	0.4375	0.0502886
chr11:68562271-68564401	-	chr11:68564401	32	2	8	0.25	0.0287364
chr11:68530094-68564401	-	chr11:68564401	32	3	6	0.1875	0.0215523
chr11:68540732-68564401	-	chr11:68564401	32	4	4	0.125	0.0143682
chr11:68571467-68575106	-	chr11:68575106	89	1	85	0.955056	0.305324
chr11:68566685-68575106	-	chr11:68575106	89	2	4	0.044944	0.0143682
chr11:68571467-68580044	-	chr11:68580044	22	1	19	0.863636	0.0682489
chr11:68552282-68580044	-	chr11:68580044	22	2	3	0.136364	0.0107761
chr11:674535-691598	-	chr11:691598	15	1	9	0.6	0.0323284
chr11:686857-691598	-	chr11:691598	15	2	6	0.4	0.0215523
chr1:169445652-169446995	-	chr1:169446995	10	1	6	0.6	0.0215523
chr1:169446392-169446995	-	chr1:169446995	10	2	4	0.4	0.0143682
chr1:1687696-1696885	-	chr1:1696885	15	1	9	0.6	0.0323284
chr1:1693390-1696885	-	chr1:1696885	15	2	6	0.4	0.0215523
chr1:16952269-16969640	-	chr1:16969640	7	1	6	0.857143	0.0215523
chr1:16969261-16969640	-	chr1:16969640	7	2	1	0.142857	0.00359205
chr11:70644547-70858384	-	chr11:70858384	6	1	2	0.333333	0.00718409
chr11:70858165-70858384	-	chr11:70858384	6	2	2	0.333333	0.00718409
chr11:70544792-70858384	-	chr11:70858384	6	3	1	0.166667	0.00359205
chr11:70742605-70858384	-	chr11:70858384	6	4	1	0.166667	0.00359205
chr11:70858165-70935842	-	chr11:70935842	77	1	68	0.883117	0.244259
chr11:70820986-70935842	-	chr11:70935842	77	2	7	0.090909	0.0251443
chr11:70935742-70935842	-	chr11:70935842	77	3	2	0.025974	0.00718409
chr1:171537385-171544267	+	chr1:171537385	42	1	33	0.785714	0.118537
chr1:171537385-171540560	+	chr1:171537385	42	2	9	0.214286	0.0323284
chr11:71671795-71671937	+	chr11:71671795	38	1	32	0.842105	0.114945
chr11:71671795-71693961	+	chr11:71671795	38	2	6	0.157895	0.0215523
chr1:1721833-1722035	-	chr1:1722035	40	1	39	0.975	0.14009
chr1:1720491-1722035	-	chr1:1722035	40	2	1	0.025	0.00359205
chr11:72420914-72425366	-	chr11:72425366	20	1	12	0.6	0.0431045
chr11:72418219-72425366	-	chr11:72425366	20	2	8	0.4	0.0287364
chr1:172520651-172526934	+	chr1:172520651	3	1	2	0.666667	0.00718409
chr1:172520651-172539870	+	chr1:172520651	3	2	1	0.333333	0.00359205
chr1:173910402-173933325	-	chr1:173933325	5	1	3	0.6	0.0107761
chr1:173915613-173933325	-	chr1:173933325	5	2	2	0.4	0.00718409
chr1:1735857-1749314	-	chr1:1749314	64	1	49	0.765625	0.17601
chr1:1747194-1749314	-	chr1:1749314	64	2	12	0.1875	0.0431045
chr1:1737913-1749314	-	chr1:1749314	64	3	3	0.046875	0.0107761
chr1:1747194-1756938	-	chr1:1756938	33	1	17	0.515152	0.0610648
chr1:1735857-1756938	-	chr1:1756938	33	2	10	0.30303	0.0359205
chr1:1737913-1756938	-	chr1:1756938	33	3	6	0.181818	0.0215523
chr1:175956078-175996824	-	chr1:175996824	11	1	10	0.909091	0.0359205
chr1:175958497-175996824	-	chr1:175996824	11	2	1	0.090909	0.00359205
chr1:176085759-176105683	-	chr1:176105683	19	1	13	0.684211	0.0466966
chr1:176050287-176105683	-	chr1:176105683	19	2	6	0.315789	0.0215523
chr1:176145045-176153828	-	chr1:176153828	4	1	3	0.75	0.0107761
chr1:176050287-176153828	-	chr1:176153828	4	2	1	0.25	0.00359205
chr1:1735857-1770677	-	chr1:1770677	52	1	24	0.461538	0.0862091
chr1:1747194-1770677	-	chr1:1770677	52	2	24	0.461538	0.0862091
chr1:1737913-1770677	-	chr1:1770677	52	3	4	0.076923	0.0143682
chr11:77330650-77336863	-	chr11:77336863	14	1	7	0.5	0.0251443
chr11:77336007-77336863	-	chr11:77336863	14	2	7	0.5	0.0251443
chr11:77336007-77340944	-	chr11:77340944	29	1	17	0.586207	0.0610648
chr11:77330650-77340944	-	chr11:77340944	29	2	7	0.241379	0.0251443
chr11:77333544-77340944	-	chr11:77340944	29	3	5	0.172414	0.0179602
chr11:77402203-77404656	-	chr11:77404656	38	1	24	0.631579	0.0862091
chr11:77394754-77404656	-	chr11:77404656	38	2	6	0.157895	0.0215523
chr11:77396149-77404656	-	chr11:77404656	38	3	6	0.157895	0.0215523
chr11:77383086-77404656	-	chr11:77404656	38	4	2	0.052632	0.00718409
chr1:178252698-178269253	+	chr1:178252698	20	1	12	0.6	0.0431045
chr1:178252698-178423783	+	chr1:178252698	20	2	7	0.35	0.0251443
chr1:178252698-178389755	+	chr1:178252698	20	3	1	0.05	0.00359205
chr1:17907047-17914974	+	chr1:17907047	195	1	114	0.584615	0.409493
chr1:17907047-18014242	+	chr1:17907047	195	2	56	0.287179	0.201155
chr1:17907047-17930086	+	chr1:17907047	195	3	10	0.051282	0.0359205
chr1:17907047-17983203	+	chr1:17907047	195	4	10	0.051282	0.0359205
chr1:17907047-17934472	+	chr1:17907047	195	5	5	0.025641	0.0179602
chr1:179089324-179091002	-	chr1:179091002	27	1	18	0.666667	0.0646568
chr1:179087721-179091002	-	chr1:179091002	27	2	9	0.333333	0.0323284
chr1:179100445-179100616	-	chr1:179100616	3	1	2	0.666667	0.00718409
chr1:179095511-179100616	-	chr1:179100616	3	2	1	0.333333	0.00359205
chr1:179306971-179312078	+	chr1:179306971	37	1	18	0.486486	0.0646568
chr1:179306971-179310445	+	chr1:179306971	37	2	16	0.432432	0.0574727
chr1:179306971-179319566	+	chr1:179306971	37	3	3	0.081081	0.0107761
chr1:179310162-179310445	+	chr1:179310162	19	1	11	0.578947	0.0395125
chr1:179310162-179319566	+	chr1:179310162	19	2	8	0.421053	0.0287364
chr1:179311248-179312770	+	chr1:179311248	13	1	12	0.923077	0.0431045
chr1:179311248-179314211	+	chr1:179311248	13	2	1	0.076923	0.00359205
chr1:179316734-179319566	+	chr1:179316734	54	1	27	0.5	0.0969852
chr1:179316734-179318077	+	chr1:179316734	54	2	24	0.444444	0.0862091
chr1:179316734-179320597	+	chr1:179316734	54	3	3	0.055556	0.0107761
chr1:183486822-183502461	+	chr1:183486822	6	1	3	0.5	0.0107761
chr1:183486822-183520325	+	chr1:183486822	6	2	3	0.5	0.0107761
chr11:847200-850367	+	chr11:847200	16	1	14	0.875	0.0502886
chr11:847200-847300	+	chr11:847200	16	2	1	0.0625	0.00359205
chr11:847200-866001	+	chr11:847200	16	3	1	0.0625	0.00359205
chr11:85373432-85374645	-	chr11:85374645	4	1	2	0.5	0.00718409
chr11:85374222-85374645	-	chr11:85374645	4	2	2	0.5	0.00718409
chr11:85685750-85692271	-	chr11:85692271	15	1	8	0.533333	0.0287364
chr11:85687665-85692271	-	chr11:85692271	15	2	7	0.466667	0.0251443
chr11:85692787-85693031	-	chr11:85693031	26	1	18	0.692308	0.0646568
chr11:85692171-85693031	-	chr11:85693031	26	2	8	0.307692	0.0287364
chr11:85692787-85693046	-	chr11:85693046	67	1	62	0.925373	0.222707
chr11:85692171-85693046	-	chr11:85693046	67	2	3	0.044776	0.0107761
chr11:85685750-85693046	-	chr11:85693046	67	3	2	0.029851	0.00718409
chr11:85685750-85695016	-	chr11:85695016	217	1	179	0.824885	0.642976
chr11:85692787-85695016	-	chr11:85695016	217	2	38	0.175115	0.136498
chr11:85694908-85701421	-	chr11:85701421	5	1	3	0.6	0.0107761
chr11:85692171-85701421	-	chr11:85701421	5	2	2	0.4	0.00718409
chr11:85692787-85701442	-	chr11:85701442	3	1	2	0.666667	0.00718409
chr11:85692171-85701442	-	chr11:85701442	3	2	1	0.333333	0.00359205
chr11:85692787-85707972	-	chr11:85707972	112	1	108	0.964286	0.387941
chr11:85692171-85707972	-	chr11:85707972	112	2	3	0.026786	0.0107761
chr11:85685750-85707972	-	chr11:85707972	112	3	1	0.008929	0.00359205
chr11:85707868-85718626	-	chr11:85718626	11	1	9	0.818182	0.0323284
chr11:85685750-85718626	-	chr11:85718626	11	2	2	0.181818	0.00718409
chr11:85707868-85742653	-	chr11:85742653	514	1	358	0.696498	1.28595
chr11:85685750-85742653	-	chr11:85742653	514	2	48	0.093385	0.172418
chr11:85718584-85742653	-	chr11:85742653	514	3	47	0.09144	0.168826
chr11:85701292-85742653	-	chr11:85742653	514	4	20	0.038911	0.0718409
chr11:85733409-85742653	-	chr11:85742653	514	5	16	0.031128	0.0574727
chr11:85722072-85742653	-	chr11:85742653	514	6	13	0.025292	0.0466966
chr11:85711685-85742653	-	chr11:85742653	514	7	8	0.015564	0.0287364
chr11:85714408-85742653	-	chr11:85742653	514	8	2	0.003891	0.00718409
chr11:85737333-85742653	-	chr11:85742653	514	9	2	0.003891	0.00718409
chr11:86778735-86802437	+	chr11:86778735	20	1	10	0.5	0.0359205
chr11:86778735-86786828	+	chr11:86778735	20	2	7	0.35	0.0251443
chr11:86778735-86807998	+	chr11:86778735	20	3	3	0.15	0.0107761
chr11:8732391-8734282	-	chr11:8734282	7	1	5	0.714286	0.0179602
chr11:8728631-8734282	-	chr11:8734282	7	2	2	0.285714	0.00718409
chr11:8987450-8989588	+	chr11:8987450	10	1	7	0.7	0.0251443
chr11:8987450-8988203	+	chr11:8987450	10	2	3	0.3	0.0107761
chr11:9168576-9192324	-	chr11:9192324	7	1	4	0.571429	0.0143682
chr11:9171627-9192324	-	chr11:9192324	7	2	2	0.285714	0.00718409
chr11:9173904-9192324	-	chr11:9192324	7	3	1	0.142857	0.00359205
chr11:93429485-93433352	+	chr11:93429485	8	1	7	0.875	0.0251443
chr11:93429485-93436085	+	chr11:93429485	8	2	1	0.125	0.00359205
chr11:9424836-9435958	+	chr11:9424836	7	1	6	0.857143	0.0215523
chr11:9424836-9430186	+	chr11:9424836	7	2	1	0.142857	0.00359205
chr11:9441957-9452550	+	chr11:9441957	3	1	2	0.666667	0.00718409
chr11:9441957-9442245	+	chr11:9441957	3	2	1	0.333333	0.00359205
chr1:19510304-19511780	-	chr1:19511780	11	1	7	0.636364	0.0251443
chr1:19499357-19511780	-	chr1:19511780	11	2	4	0.363636	0.0143682
chr1:19513033-19514034	-	chr1:19514034	7	1	5	0.714286	0.0179602
chr1:19510304-19514034	-	chr1:19514034	7	2	2	0.285714	0.00718409
chr11:95532395-95552068	+	chr11:95532395	7	1	4	0.571429	0.0143682
chr11:95532395-95546753	+	chr11:95532395	7	2	2	0.285714	0.00718409
chr11:95532395-95561191	+	chr11:95532395	7	3	1	0.142857	0.00359205
chr1:197086918-197091725	-	chr1:197091725	4	1	2	0.5	0.00718409
chr1:197091288-197091725	-	chr1:197091725	4	2	2	0.5	0.00718409
chr1:197552281-197614873	-	chr1:197614873	4	1	3	0.75	0.0107761
chr1:197611840-197614873	-	chr1:197614873	4	2	1	0.25	0.00359205
chr1:197611840-197627499	-	chr1:197627499	13	1	7	0.538462	0.0251443
chr1:197621364-197627499	-	chr1:197627499	13	2	5	0.384615	0.0179602
chr1:197576202-197627499	-	chr1:197627499	13	3	1	0.076923	0.00359205
chr11:977094-1003804	+	chr11:977094	5	1	3	0.6	0.0107761
chr11:977094-984753	+	chr11:977094	5	2	1	0.2	0.00359205
chr11:977094-994245	+	chr11:977094	5	3	1	0.2	0.00359205
chr1:1986879-1991030	+	chr1:1986879	12	1	11	0.916667	0.0395125
chr1:1986879-2087531	+	chr1:1986879	12	2	1	0.083333	0.00359205
chr1:200729966-200784772	+	chr1:200729966	13	1	7	0.538462	0.0251443
chr1:200729966-200730226	+	chr1:200729966	13	2	5	0.384615	0.0179602
chr1:200729966-200801973	+	chr1:200729966	13	3	1	0.076923	0.00359205
chr1:201821231-201828122	+	chr1:201821231	42	1	28	0.666667	0.100577
chr1:201821231-201826322	+	chr1:201821231	42	2	10	0.238095	0.0359205
chr1:201821231-201827681	+	chr1:201821231	42	3	4	0.095238	0.0143682
chr1:201826223-201828122	+	chr1:201826223	23	1	16	0.695652	0.0574727
chr1:201826223-201840455	+	chr1:201826223	23	2	6	0.26087	0.0215523
chr1:201826223-201837924	+	chr1:201826223	23	3	1	0.043478	0.00359205
chr1:203689676-203690538	+	chr1:203689676	8	1	5	0.625	0.0179602
chr1:203689676-203691817	+	chr1:203689676	8	2	3	0.375	0.0107761
chr1:204082042-204086835	+	chr1:204082042	38	1	28	0.736842	0.100577
chr1:204082042-204083733	+	chr1:204082042	38	2	5	0.131579	0.0179602
chr1:204082042-204086318	+	chr1:204082042	38	3	2	0.052632	0.00718409
chr1:204082042-204092932	+	chr1:204082042	38	4	2	0.052632	0.00718409
chr1:204082042-204093985	+	chr1:204082042	38	5	1	0.026316	0.00359205
chr1:204083448-204086318	+	chr1:204083448	4	1	2	0.5	0.00718409
chr1:204083448-204086835	+	chr1:204083448	4	2	2	0.5	0.00718409
chr1:204423796-204425179	-	chr1:204425179	6	1	3	0.5	0.0107761
chr1:204424983-204425179	-	chr1:204425179	6	2	2	0.333333	0.00718409
chr1:204413195-204425179	-	chr1:204425179	6	3	1	0.166667	0.00359205
chr1:204494611-204501374	+	chr1:204494611	10	1	8	0.8	0.0287364
chr1:204494611-204495562	+	chr1:204494611	10	2	2	0.2	0.00718409
chr1:205119807-205138960	-	chr1:205138960	12	1	5	0.416667	0.0179602
chr1:205132850-205138960	-	chr1:205138960	12	2	5	0.416667	0.0179602
chr1:205126400-205138960	-	chr1:205138960	12	3	2	0.166667	0.00718409
chr1:205156545-205156934	-	chr1:205156934	13	1	9	0.692308	0.0323284
chr1:205128674-205156934	-	chr1:205156934	13	2	4	0.307692	0.0143682
chr1:207930358-207943707	+	chr1:207930358	7	1	5	0.714286	0.0179602
chr1:207930358-207930987	+	chr1:207930358	7	2	1	0.142857	0.00359205
chr1:207930358-207933069	+	chr1:207930358	7	3	1	0.142857	0.00359205
chr1:208315673-208391347	-	chr1:208391347	2	1	1	0.5	0.00359205
chr1:208383624-208391347	-	chr1:208391347	2	2	1	0.5	0.00359205
chr12:102433645-102455124	-	chr12:102455124	2	1	1	0.5	0.00359205
chr12:102437882-102455124	-	chr12:102455124	2	2	1	0.5	0.00359205
chr12:104200099-104208899	-	chr12:104208899	7	1	5	0.714286	0.0179602
chr12:104190671-104208899	-	chr12:104208899	7	2	2	0.285714	0.00718409
chr12:104705067-104719207	+	chr12:104705067	5	1	4	0.8	0.0143682
chr12:104705067-104733051	+	chr12:104705067	5	2	1	0.2	0.00359205
chr12:105255068-105322472	-	chr12:105322472	4	1	3	0.75	0.0107761
chr12:105303432-105322472	-	chr12:105322472	4	2	1	0.25	0.00359205
chr12:107236366-107237725	+	chr12:107236366	10	1	7	0.7	0.0251443
chr12:107236366-107245372	+	chr12:107236366	10	2	3	0.3	0.0107761
chr12:109072047-109095099	-	chr12:109095099	57	1	30	0.526316	0.107761
chr12:109094899-109095099	-	chr12:109095099	57	2	21	0.368421	0.075433
chr12:109046047-109095099	-	chr12:109095099	57	3	6	0.105263	0.0215523
chr12:109605700-109644661	+	chr12:109605700	6	1	4	0.666667	0.0143682
chr12:109605700-109609719	+	chr12:109605700	6	2	2	0.333333	0.00718409
chr12:109660311-109661709	+	chr12:109660311	40	1	37	0.925	0.132906
chr12:109660311-109665294	+	chr12:109660311	40	2	3	0.075	0.0107761
chr12:109687788-109696913	+	chr12:109687788	12	1	6	0.5	0.0215523
chr12:109687788-109694041	+	chr12:109687788	12	2	4	0.333333	0.0143682
chr12:109687788-109692139	+	chr12:109687788	12	3	2	0.166667	0.00718409
chr1:21083658-21100103	-	chr1:21100103	6	1	3	0.5	0.0107761
chr1:21097422-21100103	-	chr1:21100103	6	2	3	0.5	0.0107761
chr12:110421177-110421499	-	chr12:110421499	7	1	4	0.571429	0.0143682
chr12:110418756-110421499	-	chr12:110421499	7	2	3	0.428571	0.0107761
chr1:21071236-21107033	-	chr1:21107033	5	1	4	0.8	0.0143682
chr1:21091869-21107033	-	chr1:21107033	5	2	1	0.2	0.00359205
chr12:110819556-110834257	-	chr12:110834257	37	1	15	0.405405	0.0538807
chr12:110826316-110834257	-	chr12:110834257	37	2	9	0.243243	0.0323284
chr12:110832905-110834257	-	chr12:110834257	37	3	6	0.162162	0.0215523
chr12:110825543-110834257	-	chr12:110834257	37	4	4	0.108108	0.0143682
chr12:110820647-110834257	-	chr12:110834257	37	5	3	0.081081	0.0107761
chr12:111923068-111924628	-	chr12:111924628	42	1	17	0.404762	0.0610648
chr12:111916873-111924628	-	chr12:111924628	42	2	11	0.261905	0.0395125
chr12:111923074-111924628	-	chr12:111924628	42	3	11	0.261905	0.0395125
chr12:111920590-111924628	-	chr12:111924628	42	4	3	0.071429	0.0107761
chr12:111923068-111926584	-	chr12:111926584	6	1	3	0.5	0.0107761
chr12:111923516-111926584	-	chr12:111926584	6	2	3	0.5	0.0107761
chr12:111947352-111948386	-	chr12:111948386	25	1	14	0.56	0.0502886
chr12:111923068-111948386	-	chr12:111948386	25	2	6	0.24	0.0215523
chr12:111923074-111948386	-	chr12:111948386	25	3	5	0.2	0.0179602
chr12:111907911-111993723	-	chr12:111993723	11	1	9	0.818182	0.0323284
chr12:111923068-111993723	-	chr12:111993723	11	2	2	0.181818	0.00718409
chr12:11126253-11199787	-	chr12:11199787	11	1	10	0.909091	0.0359205
chr12:11199618-11199787	-	chr12:11199787	11	2	1	0.090909	0.00359205
chr12:112093369-112098479	-	chr12:112098479	3	1	2	0.666667	0.00718409
chr12:112087742-112098479	-	chr12:112098479	3	2	1	0.333333	0.00359205
chr12:112130500-112165947	+	chr12:112130500	11	1	5	0.454545	0.0179602
chr12:112130500-112130700	+	chr12:112130500	11	2	4	0.363636	0.0143682
chr12:112130500-112147488	+	chr12:112130500	11	3	2	0.181818	0.00718409
chr12:112150301-112159543	+	chr12:112150301	4	1	3	0.75	0.0107761
chr12:112150301-112171872	+	chr12:112150301	4	2	1	0.25	0.00359205
chr12:112371689-112381173	-	chr12:112381173	53	1	34	0.641509	0.12213
chr12:112370389-112381173	-	chr12:112381173	53	2	19	0.358491	0.0682489
chr12:112743867-112757546	-	chr12:112757546	12	1	7	0.583333	0.0251443
chr12:112757028-112757546	-	chr12:112757546	12	2	5	0.416667	0.0179602
chr12:113384547-113388780	+	chr12:113384547	4	1	2	0.5	0.00718409
chr12:113384547-113399051	+	chr12:113384547	4	2	2	0.5	0.00718409
chr12:1136913-1225199	+	chr12:1136913	31	1	18	0.580645	0.0646568
chr12:1136913-1137738	+	chr12:1136913	31	2	12	0.387097	0.0431045
chr12:1136913-1250953	+	chr12:1136913	31	3	1	0.032258	0.00359205
chr12:113705647-113707650	+	chr12:113705647	189	1	177	0.936508	0.635792
chr12:113705647-113711473	+	chr12:113705647	189	2	10	0.05291	0.0359205
chr12:113705647-113710497	+	chr12:113705647	189	3	2	0.010582	0.00718409
chr1:211526580-211527809	+	chr1:211526580	26	1	25	0.961538	0.0898011
chr1:211526580-211542934	+	chr1:211526580	26	2	1	0.038462	0.00359205
chr12:116674625-116675510	-	chr12:116675510	22	1	15	0.681818	0.0538807
chr12:116675272-116675510	-	chr12:116675510	22	2	7	0.318182	0.0251443
chr12:117423010-117426674	+	chr12:117423010	6	1	4	0.666667	0.0143682
chr12:117423010-117448255	+	chr12:117423010	6	2	2	0.333333	0.00718409
chr12:118519931-118533619	-	chr12:118533619	7	1	6	0.857143	0.0215523
chr12:118517150-118533619	-	chr12:118533619	7	2	1	0.142857	0.00359205
chr12:120260623-120272032	-	chr12:120272032	3	1	2	0.666667	0.00718409
chr12:120156049-120272032	-	chr12:120272032	3	2	1	0.333333	0.00359205
chr12:120992520-121001746	+	chr12:120992520	9	1	5	0.555556	0.0179602
chr12:120992520-121009094	+	chr12:120992520	9	2	2	0.222222	0.00718409
chr12:120992520-121004783	+	chr12:120992520	9	3	1	0.111111	0.00359205
chr12:120992520-121013753	+	chr12:120992520	9	4	1	0.111111	0.00359205
chr12:120995084-120995485	+	chr12:120995084	27	1	18	0.666667	0.0646568
chr12:120995084-120998689	+	chr12:120995084	27	2	9	0.333333	0.0323284
chr12:121000747-121001746	+	chr12:121000747	3	1	2	0.666667	0.00718409
chr12:121000747-121004783	+	chr12:121000747	3	2	1	0.333333	0.00359205
chr12:1213915-1225199	+	chr12:1213915	22	1	17	0.772727	0.0610648
chr12:1213915-1289843	+	chr12:1213915	22	2	5	0.227273	0.0179602
chr12:121708700-121712388	-	chr12:121712388	4	1	2	0.5	0.00718409
chr12:121690463-121712388	-	chr12:121712388	4	2	1	0.25	0.00359205
chr12:121706440-121712388	-	chr12:121712388	4	3	1	0.25	0.00359205
chr12:121756079-121756227	-	chr12:121756227	95	1	78	0.821053	0.28018
chr12:121747772-121756227	-	chr12:121756227	95	2	13	0.136842	0.0466966
chr12:121747503-121756227	-	chr12:121756227	95	3	4	0.042105	0.0143682
chr12:122181534-122190129	+	chr12:122181534	78	1	44	0.564103	0.15805
chr12:122181534-122199644	+	chr12:122181534	78	2	33	0.423077	0.118537
chr12:122181534-122188345	+	chr12:122181534	78	3	1	0.012821	0.00359205
chr12:123068824-123073363	+	chr12:123068824	36	1	14	0.388889	0.0502886
chr12:123068824-123069537	+	chr12:123068824	36	2	12	0.333333	0.0431045
chr12:123068824-123071304	+	chr12:123068824	36	3	7	0.194444	0.0251443
chr12:123068824-123078932	+	chr12:123068824	36	4	3	0.083333	0.0107761
chr12:123102889-123109235	+	chr12:123102889	5	1	3	0.6	0.0107761
chr12:123102889-123103092	+	chr12:123102889	5	2	1	0.2	0.00359205
chr12:123102889-123107154	+	chr12:123102889	5	3	1	0.2	0.00359205
chr12:12273303-12340053	-	chr12:12340053	64	1	46	0.71875	0.165234
chr12:12332743-12340053	-	chr12:12340053	64	2	13	0.203125	0.0466966
chr12:12274019-12340053	-	chr12:12340053	64	3	5	0.078125	0.0179602
chr12:123829804-123834988	-	chr12:123834988	4	1	3	0.75	0.0107761
chr12:123818599-123834988	-	chr12:123834988	4	2	1	0.25	0.00359205
chr12:124970986-124979914	-	chr12:124979914	4	1	2	0.5	0.00718409
chr12:124941651-124979914	-	chr12:124979914	4	2	1	0.25	0.00359205
chr12:124950718-124979914	-	chr12:124979914	4	3	1	0.25	0.00359205
chr1:212502476-212506940	+	chr1:212502476	4	1	3	0.75	0.0107761
chr1:212502476-212519275	+	chr1:212502476	4	2	1	0.25	0.00359205
chr12:125292306-125294835	-	chr12:125294835	18	1	12	0.666667	0.0431045
chr12:125284669-125294835	-	chr12:125294835	18	2	6	0.333333	0.0215523
chr12:125298747-125299660	-	chr12:125299660	16	1	11	0.6875	0.0395125
chr12:125294719-125299660	-	chr12:125299660	16	2	5	0.3125	0.0179602
chr12:125296415-125302253	-	chr12:125302253	10	1	8	0.8	0.0287364
chr12:125279740-125302253	-	chr12:125302253	10	2	2	0.2	0.00718409
chr12:12653452-12674397	-	chr12:12674397	27	1	15	0.555556	0.0538807
chr12:12672795-12674397	-	chr12:12674397	27	2	12	0.444444	0.0431045
chr1:21220009-21268823	-	chr1:21268823	4	1	3	0.75	0.0107761
chr1:21231375-21268823	-	chr1:21268823	4	2	1	0.25	0.00359205
chr1:21267983-21276604	-	chr1:21276604	8	1	4	0.5	0.0143682
chr1:21276495-21276604	-	chr1:21276604	8	2	4	0.5	0.0143682
chr12:129293332-129299615	-	chr12:129299615	74	1	46	0.621622	0.165234
chr12:129299319-129299615	-	chr12:129299615	74	2	25	0.337838	0.0898011
chr12:129293940-129299615	-	chr12:129299615	74	3	3	0.040541	0.0107761
chr1:213037066-213046160	+	chr1:213037066	42	1	17	0.404762	0.0610648
chr1:213037066-213058738	+	chr1:213037066	42	2	10	0.238095	0.0359205
chr1:213037066-213062599	+	chr1:213037066	42	3	9	0.214286	0.0323284
chr1:213037066-213061936	+	chr1:213037066	42	4	6	0.142857	0.0215523
chr1:21295966-21307720	-	chr1:21307720	87	1	62	0.712644	0.222707
chr1:21306826-21307720	-	chr1:21307720	87	2	18	0.206897	0.0646568
chr1:21276495-21307720	-	chr1:21307720	87	3	3	0.034483	0.0107761
chr1:21267983-21307720	-	chr1:21307720	87	4	2	0.022989	0.00718409
chr1:21231375-21307720	-	chr1:21307720	87	5	1	0.011494	0.00359205
chr1:21267751-21307720	-	chr1:21307720	87	6	1	0.011494	0.00359205
chr1:21327691-21329301	-	chr1:21329301	71	1	31	0.43662	0.111353
chr1:21295966-21329301	-	chr1:21329301	71	2	16	0.225352	0.0574727
chr1:21276495-21329301	-	chr1:21329301	71	3	12	0.169014	0.0431045
chr1:21306826-21329301	-	chr1:21329301	71	4	12	0.169014	0.0431045
chr1:213302869-213349835	+	chr1:213302869	12	1	7	0.583333	0.0251443
chr1:213302869-213341316	+	chr1:213302869	12	2	5	0.416667	0.0179602
chr12:133102319-133124618	+	chr12:133102319	4	1	3	0.75	0.0107761
chr12:133102319-133104574	+	chr12:133102319	4	2	1	0.25	0.00359205
chr12:133148873-133158852	+	chr12:133148873	26	1	23	0.884615	0.082617
chr12:133148873-133153517	+	chr12:133148873	26	2	3	0.115385	0.0107761
chr12:133225514-133257865	-	chr12:133257865	8	1	6	0.75	0.0215523
chr12:133225891-133257865	-	chr12:133257865	8	2	1	0.125	0.00359205
chr12:133257192-133257865	-	chr12:133257865	8	3	1	0.125	0.00359205
chr12:133383762-133398897	-	chr12:133398897	23	1	15	0.652174	0.0538807
chr12:133381301-133398897	-	chr12:133398897	23	2	8	0.347826	0.0287364
chr1:21329205-21377487	-	chr1:21377487	52	1	21	0.403846	0.075433
chr1:21220009-21377487	-	chr1:21377487	52	2	11	0.211538	0.0395125
chr1:21306826-21377487	-	chr1:21377487	52	3	8	0.153846	0.0287364
chr1:21276495-21377487	-	chr1:21377487	52	4	5	0.096154	0.0179602
chr1:21327691-21377487	-	chr1:21377487	52	5	5	0.096154	0.0179602
chr1:21167348-21377487	-	chr1:21377487	52	6	1	0.019231	0.00359205
chr1:21295966-21377487	-	chr1:21377487	52	7	1	0.019231	0.00359205
chr12:1399017-1517413	+	chr12:1399017	3	1	2	0.666667	0.00718409
chr12:1399017-1481143	+	chr12:1399017	3	2	1	0.333333	0.00359205
chr1:21377358-21415706	-	chr1:21415706	215	1	174	0.809302	0.625016
chr1:21329205-21415706	-	chr1:21415706	215	2	23	0.106977	0.082617
chr1:21295966-21415706	-	chr1:21415706	215	3	8	0.037209	0.0287364
chr1:21327691-21415706	-	chr1:21415706	215	4	5	0.023256	0.0179602
chr1:21276495-21415706	-	chr1:21415706	215	5	4	0.018605	0.0143682
chr1:21220009-21415706	-	chr1:21415706	215	6	1	0.004651	0.00359205
chr1:21415630-21437876	-	chr1:21437876	323	1	145	0.448916	0.520847
chr1:21377358-21437876	-	chr1:21437876	323	2	140	0.433437	0.502886
chr1:21329205-21437876	-	chr1:21437876	323	3	27	0.083591	0.0969852
chr1:21295966-21437876	-	chr1:21437876	323	4	6	0.018576	0.0215523
chr1:21306826-21437876	-	chr1:21437876	323	5	5	0.01548	0.0179602
chr1:21553651-21554534	-	chr1:21554534	19	1	17	0.894737	0.0610648
chr1:21548239-21554534	-	chr1:21554534	19	2	2	0.105263	0.00718409
chr1:21571481-21573856	-	chr1:21573856	8	1	6	0.75	0.0215523
chr1:21573713-21573856	-	chr1:21573856	8	2	2	0.25	0.00718409
chr12:15834159-15835906	-	chr12:15835906	5	1	3	0.6	0.0107761
chr12:15822320-15835906	-	chr12:15835906	5	2	2	0.4	0.00718409
chr1:21599191-21599404	-	chr1:21599404	19	1	18	0.947368	0.0646568
chr1:21586763-21599404	-	chr1:21599404	19	2	1	0.052632	0.00359205
chr1:21599191-21616649	-	chr1:21616649	44	1	42	0.954545	0.150866
chr1:21605683-21616649	-	chr1:21616649	44	2	2	0.045455	0.00718409
chr12:19615443-19626289	+	chr12:19615443	54	1	48	0.888889	0.172418
chr12:19615443-19653155	+	chr12:19615443	54	2	3	0.055556	0.0107761
chr12:19615443-19667718	+	chr12:19615443	54	3	3	0.055556	0.0107761
chr12:19626181-19653155	+	chr12:19626181	4	1	3	0.75	0.0107761
chr12:19626181-19667718	+	chr12:19626181	4	2	1	0.25	0.00359205
chr12:20546828-20556968	+	chr12:20546828	11	1	9	0.818182	0.0323284
chr12:20546828-20556049	+	chr12:20546828	11	2	2	0.181818	0.00718409
chr12:20709593-20807139	+	chr12:20709593	55	1	22	0.4	0.079025
chr12:20709593-20774345	+	chr12:20709593	55	2	12	0.218182	0.0431045
chr12:20709593-20787990	+	chr12:20709593	55	3	8	0.145455	0.0287364
chr12:20709593-20766634	+	chr12:20709593	55	4	5	0.090909	0.0179602
chr12:20709593-20769318	+	chr12:20709593	55	5	4	0.072727	0.0143682
chr12:20709593-20790171	+	chr12:20709593	55	6	4	0.072727	0.0143682
chr1:220752695-220792097	+	chr1:220752695	5	1	3	0.6	0.0107761
chr1:220752695-220754460	+	chr1:220752695	5	2	2	0.4	0.00718409
chr12:20766376-20807139	+	chr12:20766376	93	1	48	0.516129	0.172418
chr12:20766376-20774345	+	chr12:20766376	93	2	18	0.193548	0.0646568
chr12:20766376-20783061	+	chr12:20766376	93	3	16	0.172043	0.0574727
chr12:20766376-20766634	+	chr12:20766376	93	4	4	0.043011	0.0143682
chr12:20766376-20803534	+	chr12:20766376	93	5	4	0.043011	0.0143682
chr12:20766376-20790171	+	chr12:20766376	93	6	3	0.032258	0.0107761
chr12:20774229-20792891	+	chr12:20774229	9	1	8	0.888889	0.0287364
chr12:20774229-20783061	+	chr12:20774229	9	2	1	0.111111	0.00359205
chr1:220969984-220978616	+	chr1:220969984	39	1	38	0.974359	0.136498
chr1:220969984-220971407	+	chr1:220969984	39	2	1	0.025641	0.00359205
chr12:22622642-22659753	-	chr12:22659753	6	1	3	0.5	0.0107761
chr12:22635490-22659753	-	chr12:22659753	6	2	3	0.5	0.0107761
chr12:22811947-22826594	+	chr12:22811947	6	1	5	0.833333	0.0179602
chr12:22811947-22814139	+	chr12:22811947	6	2	1	0.166667	0.00359205
chr12:23998916-23999127	-	chr12:23999127	12	1	7	0.583333	0.0251443
chr12:23887617-23999127	-	chr12:23999127	12	2	5	0.416667	0.0179602
chr12:23887617-24048958	-	chr12:24048958	13	1	9	0.692308	0.0323284
chr12:23793745-24048958	-	chr12:24048958	13	2	3	0.230769	0.0107761
chr12:23818377-24048958	-	chr12:24048958	13	3	1	0.076923	0.00359205
chr1:224599128-224607317	-	chr1:224607317	4	1	2	0.5	0.00718409
chr1:224605961-224607317	-	chr1:224607317	4	2	2	0.5	0.00718409
chr1:225140371-225156576	+	chr1:225140371	7	1	3	0.428571	0.0107761
chr1:225140371-225195246	+	chr1:225140371	7	2	3	0.428571	0.0107761
chr1:225140371-225239497	+	chr1:225140371	7	3	1	0.142857	0.00359205
chr1:225355640-225373127	+	chr1:225355640	2	1	1	0.5	0.00359205
chr1:225355640-225393881	+	chr1:225355640	2	2	1	0.5	0.00359205
chr1:225372992-225394922	+	chr1:225372992	6	1	3	0.5	0.0107761
chr1:225372992-225418853	+	chr1:225372992	6	2	3	0.5	0.0107761
chr12:26568235-26596583	-	chr12:26596583	8	1	4	0.5	0.0143682
chr12:26592059-26596583	-	chr12:26596583	8	2	4	0.5	0.0143682
chr12:26628228-26784992	-	chr12:26784992	6	1	4	0.666667	0.0143682
chr12:26774055-26784992	-	chr12:26784992	6	2	2	0.333333	0.00718409
chr12:26780965-26808785	-	chr12:26808785	5	1	3	0.6	0.0107761
chr12:26580845-26808785	-	chr12:26808785	5	2	1	0.2	0.00359205
chr12:26628228-26808785	-	chr12:26808785	5	3	1	0.2	0.00359205
chr12:26864105-26869175	-	chr12:26869175	3	1	2	0.666667	0.00718409
chr12:26848538-26869175	-	chr12:26869175	3	2	1	0.333333	0.00359205
chr12:27135705-27143560	-	chr12:27143560	21	1	10	0.47619	0.0359205
chr12:27143382-27143560	-	chr12:27143560	21	2	6	0.285714	0.0215523
chr12:27132716-27143560	-	chr12:27143560	21	3	5	0.238095	0.0179602
chr12:27149674-27152609	-	chr12:27152609	38	1	21	0.552632	0.075433
chr12:27143382-27152609	-	chr12:27152609	38	2	14	0.368421	0.0502886
chr12:27132716-27152609	-	chr12:27152609	38	3	2	0.052632	0.00718409
chr12:27135705-27152609	-	chr12:27152609	38	4	1	0.026316	0.00359205
chr12:27148169-27156323	-	chr12:27156323	3	1	2	0.666667	0.00718409
chr12:27143382-27156323	-	chr12:27156323	3	2	1	0.333333	0.00359205
chr1:227327276-227335260	-	chr1:227335260	3	1	2	0.666667	0.00718409
chr1:227257477-227335260	-	chr1:227335260	3	2	1	0.333333	0.00359205
chr12:28458581-28460682	+	chr12:28458581	445	1	246	0.552809	0.883643
chr12:28458581-28544344	+	chr12:28458581	445	2	179	0.402247	0.642976
chr12:28458581-28515448	+	chr12:28458581	445	3	17	0.038202	0.0610648
chr12:28458581-28565871	+	chr12:28458581	445	4	3	0.006742	0.0107761
chr12:2929251-2930958	+	chr12:2929251	43	1	34	0.790698	0.12213
chr12:2929251-2933109	+	chr12:2929251	43	2	5	0.116279	0.0179602
chr12:2929251-2933418	+	chr12:2929251	43	3	3	0.069767	0.0107761
chr12:2929251-2940051	+	chr12:2929251	43	4	1	0.023256	0.00359205
chr12:2931959-2933418	+	chr12:2931959	40	1	36	0.9	0.129314
chr12:2931959-2946122	+	chr12:2931959	40	2	4	0.1	0.0143682
chr1:229661682-229678118	-	chr1:229678118	2	1	1	0.5	0.00359205
chr1:229675202-229678118	-	chr1:229678118	2	2	1	0.5	0.00359205
chr1:229675202-229685181	-	chr1:229685181	27	1	11	0.407407	0.0395125
chr1:229665945-229685181	-	chr1:229685181	27	2	10	0.37037	0.0359205
chr1:229657338-229685181	-	chr1:229685181	27	3	6	0.222222	0.0215523
chr12:2973485-2975687	-	chr12:2975687	4	1	3	0.75	0.0107761
chr12:2975558-2975687	-	chr12:2975687	4	2	1	0.25	0.00359205
chr12:29709789-29786269	-	chr12:29786269	8	1	7	0.875	0.0251443
chr12:29689141-29786269	-	chr12:29786269	8	2	1	0.125	0.00359205
chr12:29812812-29813818	-	chr12:29813818	24	1	16	0.666667	0.0574727
chr12:29786079-29813818	-	chr12:29813818	24	2	8	0.333333	0.0287364
chr1:230313963-230339036	+	chr1:230313963	40	1	38	0.95	0.136498
chr1:230313963-230314057	+	chr1:230313963	40	2	1	0.025	0.00359205
chr1:230313963-230386306	+	chr1:230313963	40	3	1	0.025	0.00359205
chr1:231090078-231097049	-	chr1:231097049	118	1	83	0.70339	0.29814
chr1:231081134-231097049	-	chr1:231097049	118	2	18	0.152542	0.0646568
chr1:231079551-231097049	-	chr1:231097049	118	3	12	0.101695	0.0431045
chr1:231093969-231097049	-	chr1:231097049	118	4	3	0.025424	0.0107761
chr1:231047215-231097049	-	chr1:231097049	118	5	2	0.016949	0.00718409
chr12:31586088-31600703	-	chr12:31600703	33	1	28	0.848485	0.100577
chr12:31595708-31600703	-	chr12:31600703	33	2	4	0.121212	0.0143682
chr12:31566369-31600703	-	chr12:31600703	33	3	1	0.030303	0.00359205
chr12:31648743-31652605	-	chr12:31652605	9	1	6	0.666667	0.0215523
chr12:31595708-31652605	-	chr12:31652605	9	2	3	0.333333	0.0107761
chr1:231885671-231906816	+	chr1:231885671	2	1	1	0.5	0.00359205
chr1:231885671-231910563	+	chr1:231885671	2	2	1	0.5	0.00359205
chr1:233190013-233314921	-	chr1:233314921	4	1	2	0.5	0.00718409
chr1:233270758-233314921	-	chr1:233314921	4	2	2	0.5	0.00718409
chr1:233334684-233344435	-	chr1:233344435	19	1	12	0.631579	0.0431045
chr1:233270758-233344435	-	chr1:233344435	19	2	4	0.210526	0.0143682
chr1:233296028-233344435	-	chr1:233344435	19	3	3	0.157895	0.0107761
chr1:233313547-233353930	-	chr1:233353930	3	1	2	0.666667	0.00718409
chr1:233334684-233353930	-	chr1:233353930	3	2	1	0.333333	0.00359205
chr1:233362971-233372726	-	chr1:233372726	22	1	13	0.590909	0.0466966
chr1:233344263-233372726	-	chr1:233372726	22	2	7	0.318182	0.0251443
chr1:233334684-233372726	-	chr1:233372726	22	3	2	0.090909	0.00718409
chr1:233344263-233398868	-	chr1:233398868	2	1	1	0.5	0.00359205
chr1:233372590-233398868	-	chr1:233398868	2	2	1	0.5	0.00359205
chr1:233489552-233498039	+	chr1:233489552	13	1	11	0.846154	0.0395125
chr1:233489552-233515456	+	chr1:233489552	13	2	2	0.153846	0.00718409
chr1:23356961-23377013	+	chr1:23356961	7	1	4	0.571429	0.0143682
chr1:23356961-23385660	+	chr1:23356961	7	2	3	0.428571	0.0107761
chr1:23381561-23384058	+	chr1:23381561	4	1	3	0.75	0.0107761
chr1:23381561-23399896	+	chr1:23381561	4	2	1	0.25	0.00359205
chr1:235643369-235658138	-	chr1:235658138	54	1	51	0.944444	0.183194
chr1:235647637-235658138	-	chr1:235658138	54	2	3	0.055556	0.0107761
chr1:236187369-236201553	-	chr1:236201553	21	1	16	0.761905	0.0574727
chr1:236195700-236201553	-	chr1:236201553	21	2	3	0.142857	0.0107761
chr1:236192849-236201553	-	chr1:236201553	21	3	2	0.095238	0.00718409
chr1:236758839-236760276	-	chr1:236760276	5	1	3	0.6	0.0107761
chr1:236757311-236760276	-	chr1:236760276	5	2	2	0.4	0.00718409
chr12:40412647-40442012	-	chr12:40442012	14	1	8	0.571429	0.0287364
chr12:40441852-40442012	-	chr12:40442012	14	2	4	0.285714	0.0143682
chr12:40422102-40442012	-	chr12:40442012	14	3	2	0.142857	0.00718409
chr1:24130889-24147083	-	chr1:24147083	9	1	6	0.666667	0.0215523
chr1:24140679-24147083	-	chr1:24147083	9	2	3	0.333333	0.0107761
chr1:243385025-243388623	-	chr1:243388623	24	1	15	0.625	0.0538807
chr1:243327585-243388623	-	chr1:243388623	24	2	7	0.291667	0.0251443
chr1:243319522-243388623	-	chr1:243388623	24	3	2	0.083333	0.00718409
chr1:246078831-246093239	-	chr1:246093239	129	1	60	0.465116	0.215523
chr1:246091232-246093239	-	chr1:246093239	129	2	45	0.348837	0.161642
chr1:246021797-246093239	-	chr1:246093239	129	3	24	0.186047	0.0862091
chr12:46230371-46233279	+	chr12:46230371	5	1	3	0.6	0.0107761
chr12:46230371-46254732	+	chr12:46230371	5	2	2	0.4	0.00718409
chr12:46622935-46637097	-	chr12:46637097	39	1	38	0.974359	0.136498
chr12:46633461-46637097	-	chr12:46637097	39	2	1	0.025641	0.00359205
chr1:24840803-24859744	+	chr1:24840803	7	1	4	0.571429	0.0143682
chr1:24840803-24841057	+	chr1:24840803	7	2	3	0.428571	0.0107761
chr12:48465449-48468576	-	chr12:48468576	2	1	1	0.5	0.00359205
chr12:48468106-48468576	-	chr12:48468576	2	2	1	0.5	0.00359205
chr12:48477373-48491907	-	chr12:48491907	14	1	11	0.785714	0.0395125
chr12:48482583-48491907	-	chr12:48491907	14	2	2	0.142857	0.00718409
chr12:48490125-48491907	-	chr12:48491907	14	3	1	0.071429	0.00359205
chr12:49072818-49073616	-	chr12:49073616	8	1	5	0.625	0.0179602
chr12:49056342-49073616	-	chr12:49073616	8	2	3	0.375	0.0107761
chr12:49332817-49334971	-	chr12:49334971	12	1	7	0.583333	0.0251443
chr12:49333437-49334971	-	chr12:49334971	12	2	5	0.416667	0.0179602
chr12:49854552-49883356	+	chr12:49854552	2	1	1	0.5	0.00359205
chr12:49854552-49884514	+	chr12:49854552	2	2	1	0.5	0.00359205
chr12:50821544-50824353	+	chr12:50821544	16	1	8	0.5	0.0287364
chr12:50821544-50822873	+	chr12:50821544	16	2	3	0.1875	0.0107761
chr12:50821544-50855130	+	chr12:50821544	16	3	3	0.1875	0.0107761
chr12:50821544-50835426	+	chr12:50821544	16	4	2	0.125	0.00718409
chr12:50847242-50848200	+	chr12:50847242	9	1	6	0.666667	0.0215523
chr12:50847242-50847455	+	chr12:50847242	9	2	2	0.222222	0.00718409
chr12:50847242-50860903	+	chr12:50847242	9	3	1	0.111111	0.00359205
chr12:51064968-51074546	+	chr12:51064968	37	1	17	0.459459	0.0610648
chr12:51064968-51077031	+	chr12:51064968	37	2	8	0.216216	0.0287364
chr12:51064968-51072659	+	chr12:51064968	37	3	7	0.189189	0.0251443
chr12:51064968-51080465	+	chr12:51064968	37	4	3	0.081081	0.0107761
chr12:51064968-51069231	+	chr12:51064968	37	5	2	0.054054	0.00718409
chr12:51122330-51126319	+	chr12:51122330	17	1	11	0.647059	0.0395125
chr12:51122330-51130893	+	chr12:51122330	17	2	6	0.352941	0.0215523
chr12:51173922-51203372	+	chr12:51173922	25	1	18	0.72	0.0646568
chr12:51173922-51189792	+	chr12:51173922	25	2	6	0.24	0.0215523
chr12:51173922-51208222	+	chr12:51173922	25	3	1	0.04	0.00359205
chr12:51384577-51393198	-	chr12:51393198	3	1	2	0.666667	0.00718409
chr12:51390599-51393198	-	chr12:51393198	3	2	1	0.333333	0.00359205
chr12:51442816-51451911	+	chr12:51442816	25	1	14	0.56	0.0502886
chr12:51442816-51450285	+	chr12:51442816	25	2	11	0.44	0.0395125
chr12:52631292-52639416	+	chr12:52631292	3	1	2	0.666667	0.00718409
chr12:52631292-52636921	+	chr12:52631292	3	2	1	0.333333	0.00359205
chr12:53512133-53515185	+	chr12:53512133	5	1	4	0.8	0.0143682
chr12:53512133-53512719	+	chr12:53512133	5	2	1	0.2	0.00359205
chr12:53670403-53671011	+	chr12:53670403	26	1	18	0.692308	0.0646568
chr12:53670403-53671744	+	chr12:53670403	26	2	8	0.307692	0.0287364
chr12:53848509-53865591	+	chr12:53848509	5	1	3	0.6	0.0107761
chr12:53848509-53856351	+	chr12:53848509	5	2	2	0.4	0.00718409
chr12:56676203-56680429	-	chr12:56680429	13	1	9	0.692308	0.0323284
chr12:56679699-56680429	-	chr12:56680429	13	2	4	0.307692	0.0143682
chr12:56962758-56965639	+	chr12:56962758	27	1	23	0.851852	0.082617
chr12:56962758-56975936	+	chr12:56962758	27	2	4	0.148148	0.0143682
chr12:56998000-56999111	-	chr12:56999111	10	1	8	0.8	0.0287364
chr12:56997142-56999111	-	chr12:56999111	10	2	2	0.2	0.00718409
chr1:26566252-26586293	+	chr1:26566252	3	1	2	0.666667	0.00718409
chr1:26566252-26570809	+	chr1:26566252	3	2	1	0.333333	0.00359205
chr1:26581661-26582356	+	chr1:26581661	7	1	6	0.857143	0.0215523
chr1:26581661-26586293	+	chr1:26581661	7	2	1	0.142857	0.00359205
chr1:26584087-26586293	+	chr1:26584087	22	1	13	0.590909	0.0466966
chr1:26584087-26584751	+	chr1:26584087	22	2	9	0.409091	0.0323284
chr12:6623430-6623753	+	chr12:6623430	4	1	3	0.75	0.0107761
chr12:6623430-6626191	+	chr12:6623430	4	2	1	0.25	0.00359205
chr1:26772806-26774151	+	chr1:26772806	127	1	111	0.874016	0.398717
chr1:26772806-26786635	+	chr1:26772806	127	2	16	0.125984	0.0574727
chr12:69044179-69048032	+	chr12:69044179	3	1	2	0.666667	0.00718409
chr12:69044179-69050997	+	chr12:69044179	3	2	1	0.333333	0.00359205
chr12:69214104-69218431	+	chr12:69214104	34	1	17	0.5	0.0610648
chr12:69214104-69222711	+	chr12:69214104	34	2	17	0.5	0.0610648
chr12:70713077-70724249	+	chr12:70713077	73	1	51	0.69863	0.183194
chr12:70713077-70736087	+	chr12:70713077	73	2	10	0.136986	0.0359205
chr12:70713077-70723350	+	chr12:70713077	73	3	8	0.109589	0.0287364
chr12:70713077-70738008	+	chr12:70713077	73	4	2	0.027397	0.00718409
chr12:70713077-70740104	+	chr12:70713077	73	5	2	0.027397	0.00718409
chr12:70723202-70724249	+	chr12:70723202	7	1	6	0.857143	0.0215523
chr12:70723202-70740104	+	chr12:70723202	7	2	1	0.142857	0.00359205
chr12:7287922-7288987	+	chr12:7287922	7	1	4	0.571429	0.0143682
chr12:7287922-7303659	+	chr12:7287922	7	2	3	0.428571	0.0107761
chr12:81536885-81545875	+	chr12:81536885	5	1	4	0.8	0.0143682
chr12:81536885-81568718	+	chr12:81536885	5	2	1	0.2	0.00359205
chr12:81545622-81610775	+	chr12:81545622	2	1	1	0.5	0.00359205
chr12:81545622-81627250	+	chr12:81545622	2	2	1	0.5	0.00359205
chr1:28365349-28369161	-	chr1:28369161	4	1	3	0.75	0.0107761
chr1:28354299-28369161	-	chr1:28369161	4	2	1	0.25	0.00359205
chr12:8866406-8906689	+	chr12:8866406	54	1	44	0.814815	0.15805
chr12:8866406-8866637	+	chr12:8866406	54	2	10	0.185185	0.0359205
chr12:8902457-8906689	+	chr12:8902457	6	1	4	0.666667	0.0143682
chr12:8902457-8926062	+	chr12:8902457	6	2	2	0.333333	0.00718409
chr12:90003713-90049884	-	chr12:90049884	4	1	3	0.75	0.0107761
chr12:90035934-90049884	-	chr12:90049884	4	2	1	0.25	0.00359205
chr12:9229351-9266139	-	chr12:9266139	9	1	3	0.333333	0.0107761
chr12:9246060-9266139	-	chr12:9266139	9	2	3	0.333333	0.0107761
chr12:9256834-9266139	-	chr12:9266139	9	3	2	0.222222	0.00718409
chr12:9242951-9266139	-	chr12:9266139	9	4	1	0.111111	0.00359205
chr1:29533273-29543197	-	chr1:29543197	10	1	8	0.8	0.0287364
chr1:29542516-29543197	-	chr1:29543197	10	2	2	0.2	0.00718409
chr12:95660132-95676420	+	chr12:95660132	7	1	4	0.571429	0.0143682
chr12:95660132-95668665	+	chr12:95660132	7	2	3	0.428571	0.0107761
chr1:29581786-29587415	+	chr1:29581786	10	1	7	0.7	0.0251443
chr1:29581786-29602268	+	chr1:29581786	10	2	2	0.2	0.00718409
chr1:29581786-29606653	+	chr1:29581786	10	3	1	0.1	0.00359205
chr13:100953713-100962162	+	chr13:100953713	67	1	49	0.731343	0.17601
chr13:100953713-101020828	+	chr13:100953713	67	2	18	0.268657	0.0646568
chr13:100982814-100992513	+	chr13:100982814	7	1	4	0.571429	0.0143682
chr13:100982814-101020828	+	chr13:100982814	7	2	3	0.428571	0.0107761
chr13:111274562-111276626	+	chr13:111274562	36	1	25	0.694444	0.0898011
chr13:111274562-111279894	+	chr13:111274562	36	2	7	0.194444	0.0251443
chr13:111274562-111287935	+	chr13:111274562	36	3	4	0.111111	0.0143682
chr13:111857635-111862349	+	chr13:111857635	14	1	6	0.428571	0.0215523
chr13:111857635-111920017	+	chr13:111857635	14	2	4	0.285714	0.0143682
chr13:111857635-111885640	+	chr13:111857635	14	3	3	0.214286	0.0107761
chr13:111857635-111870227	+	chr13:111857635	14	4	1	0.071429	0.00359205
chr13:111862218-111870227	+	chr13:111862218	2	1	1	0.5	0.00359205
chr13:111862218-111896641	+	chr13:111862218	2	2	1	0.5	0.00359205
chr13:113170753-113181798	-	chr13:113181798	67	1	62	0.925373	0.222707
chr13:113158345-113181798	-	chr13:113181798	67	2	5	0.074627	0.0179602
chr13:113873258-113883833	+	chr13:113873258	27	1	26	0.962963	0.0933932
chr13:113873258-113887653	+	chr13:113873258	27	2	1	0.037037	0.00359205
chr13:113960799-113965182	+	chr13:113960799	41	1	31	0.756098	0.111353
chr13:113960799-113964177	+	chr13:113960799	41	2	10	0.243902	0.0359205
chr13:114149816-114175048	+	chr13:114149816	247	1	147	0.595142	0.528031
chr13:114149816-114164739	+	chr13:114149816	247	2	43	0.174089	0.154458
chr13:114149816-114193822	+	chr13:114149816	247	3	36	0.145749	0.129314
chr13:114149816-114188555	+	chr13:114149816	247	4	20	0.080972	0.0718409
chr13:114149816-114165509	+	chr13:114149816	247	5	1	0.004049	0.00359205
chr13:114164552-114175048	+	chr13:114164552	36	1	20	0.555556	0.0718409
chr13:114164552-114193822	+	chr13:114164552	36	2	16	0.444444	0.0574727
chr13:114174930-114193822	+	chr13:114174930	65	1	61	0.938462	0.219115
chr13:114174930-114188555	+	chr13:114174930	65	2	4	0.061538	0.0143682
chr13:114240088-114290443	+	chr13:114240088	2	1	1	0.5	0.00359205
chr13:114240088-114292211	+	chr13:114240088	2	2	1	0.5	0.00359205
chr1:31422973-31425210	-	chr1:31425210	2	1	1	0.5	0.00359205
chr1:31422979-31425210	-	chr1:31425210	2	2	1	0.5	0.00359205
chr1:31409489-31440157	-	chr1:31440157	23	1	22	0.956522	0.079025
chr1:31422979-31440157	-	chr1:31440157	23	2	1	0.043478	0.00359205
chr1:31438828-31441339	-	chr1:31441339	8	1	5	0.625	0.0179602
chr1:31437520-31441339	-	chr1:31441339	8	2	3	0.375	0.0107761
chr1:31452908-31454252	-	chr1:31454252	182	1	84	0.461538	0.301732
chr1:31447497-31454252	-	chr1:31454252	182	2	61	0.335165	0.219115
chr1:31437520-31454252	-	chr1:31454252	182	3	28	0.153846	0.100577
chr1:31438828-31454252	-	chr1:31454252	182	4	6	0.032967	0.0215523
chr1:31422979-31454252	-	chr1:31454252	182	5	3	0.016484	0.0107761
chr1:31465236-31468067	-	chr1:31468067	77	1	43	0.558442	0.154458
chr1:31452908-31468067	-	chr1:31468067	77	2	34	0.441558	0.12213
chr1:31532050-31532424	-	chr1:31532424	23	1	17	0.73913	0.0610648
chr1:31528159-31532424	-	chr1:31532424	23	2	5	0.217391	0.0179602
chr1:31478699-31532424	-	chr1:31532424	23	3	1	0.043478	0.00359205
chr1:31896539-31899670	+	chr1:31896539	28	1	19	0.678571	0.0682489
chr1:31896539-31898760	+	chr1:31896539	28	2	6	0.214286	0.0215523
chr1:31896539-31902385	+	chr1:31896539	28	3	3	0.107143	0.0107761
chr13:20534097-20568059	+	chr13:20534097	8	1	4	0.5	0.0143682
chr13:20534097-20580726	+	chr13:20534097	8	2	2	0.25	0.00718409
chr13:20534097-20641530	+	chr13:20534097	8	3	2	0.25	0.00718409
chr13:20567202-20641530	+	chr13:20567202	8	1	5	0.625	0.0179602
chr13:20567202-20568059	+	chr13:20567202	8	2	3	0.375	0.0107761
chr13:21364600-21396428	-	chr13:21396428	17	1	13	0.764706	0.0466966
chr13:21381595-21396428	-	chr13:21396428	17	2	4	0.235294	0.0143682
chr13:21436855-21442840	-	chr13:21442840	5	1	3	0.6	0.0107761
chr13:21429765-21442840	-	chr13:21442840	5	2	2	0.4	0.00718409
chr13:21955572-21965993	-	chr13:21965993	12	1	11	0.916667	0.0395125
chr13:21961646-21965993	-	chr13:21965993	12	2	1	0.083333	0.00359205
chr1:32381495-32385259	-	chr1:32385259	61	1	57	0.934426	0.204747
chr1:32377296-32385259	-	chr1:32385259	61	2	2	0.032787	0.00718409
chr1:32384570-32385259	-	chr1:32385259	61	3	2	0.032787	0.00718409
chr13:25887020-25895231	+	chr13:25887020	11	1	5	0.454545	0.0179602
chr13:25887020-25912869	+	chr13:25887020	11	2	5	0.454545	0.0179602
chr13:25887020-25889605	+	chr13:25887020	11	3	1	0.090909	0.00359205
chr1:32653554-32655850	+	chr1:32653554	15	1	12	0.8	0.0431045
chr1:32653554-32653725	+	chr1:32653554	15	2	3	0.2	0.0107761
chr1:32689634-32690076	+	chr1:32689634	82	1	74	0.902439	0.265811
chr1:32689634-32692131	+	chr1:32689634	82	2	8	0.097561	0.0287364
chr1:32691771-32692131	+	chr1:32691771	7	1	6	0.857143	0.0215523
chr1:32691771-32694809	+	chr1:32691771	7	2	1	0.142857	0.00359205
chr13:28748408-28752072	+	chr13:28748408	53	1	41	0.773585	0.147274
chr13:28748408-28794515	+	chr13:28748408	53	2	11	0.207547	0.0395125
chr13:28748408-28813833	+	chr13:28748408	53	3	1	0.018868	0.00359205
chr13:28830428-28835595	+	chr13:28830428	79	1	67	0.848101	0.240667
chr13:28830428-28845003	+	chr13:28830428	79	2	8	0.101266	0.0287364
chr13:28830428-28855516	+	chr13:28830428	79	3	4	0.050633	0.0143682
chr13:30096453-30127997	-	chr13:30127997	4	1	2	0.5	0.00718409
chr13:30106960-30127997	-	chr13:30127997	4	2	2	0.5	0.00718409
chr1:33058531-33059355	+	chr1:33058531	18	1	9	0.5	0.0323284
chr1:33058531-33060824	+	chr1:33058531	18	2	9	0.5	0.0323284
chr1:33093108-33099711	-	chr1:33099711	2	1	1	0.5	0.00359205
chr1:33099245-33099711	-	chr1:33099711	2	2	1	0.5	0.00359205
chr1:33097427-33100393	-	chr1:33100393	8	1	4	0.5	0.0143682
chr1:33099245-33100393	-	chr1:33100393	8	2	4	0.5	0.0143682
chr1:33290913-33318767	+	chr1:33290913	7	1	4	0.571429	0.0143682
chr1:33290913-33295668	+	chr1:33290913	7	2	3	0.428571	0.0107761
chr13:33306237-33309467	+	chr13:33306237	78	1	75	0.961538	0.269403
chr13:33306237-33320238	+	chr13:33306237	78	2	3	0.038462	0.0107761
chr1:33741700-33747412	+	chr1:33741700	6	1	5	0.833333	0.0179602
chr1:33741700-33742195	+	chr1:33741700	6	2	1	0.166667	0.00359205
chr13:37614541-37625720	-	chr13:37625720	18	1	15	0.833333	0.0538807
chr13:37586328-37625720	-	chr13:37625720	18	2	2	0.111111	0.00718409
chr13:37598171-37625720	-	chr13:37625720	18	3	1	0.055556	0.00359205
chr13:41333083-41333242	-	chr13:41333242	13	1	11	0.846154	0.0395125
chr13:41323273-41333242	-	chr13:41333242	13	2	2	0.153846	0.00718409
chr13:41826780-41835051	-	chr13:41835051	30	1	25	0.833333	0.0898011
chr13:41814396-41835051	-	chr13:41835051	30	2	5	0.166667	0.0179602
chr13:41826780-41837620	-	chr13:41837620	16	1	13	0.8125	0.0466966
chr13:41797391-41837620	-	chr13:41837620	16	2	3	0.1875	0.0107761
chr13:42385360-42407667	-	chr13:42407667	53	1	47	0.886792	0.168826
chr13:42335263-42407667	-	chr13:42407667	53	2	4	0.075472	0.0143682
chr13:42404664-42407667	-	chr13:42407667	53	3	2	0.037736	0.00718409
chr13:47297355-47303119	+	chr13:47297355	2	1	1	0.5	0.00359205
chr13:47297355-47308133	+	chr13:47297355	2	2	1	0.5	0.00359205
chr13:51939838-52004519	-	chr13:52004519	2	1	1	0.5	0.00359205
chr13:51957464-52004519	-	chr13:52004519	2	2	1	0.5	0.00359205
chr1:35824525-35827390	+	chr1:35824525	9	1	8	0.888889	0.0287364
chr1:35824525-35847359	+	chr1:35824525	9	2	1	0.111111	0.00359205
chr1:35846859-35855699	+	chr1:35846859	19	1	7	0.368421	0.0251443
chr1:35846859-35847359	+	chr1:35846859	19	2	5	0.263158	0.0179602
chr1:35846859-35871069	+	chr1:35846859	19	3	3	0.157895	0.0107761
chr1:35846859-35854683	+	chr1:35846859	19	4	2	0.105263	0.00718409
chr1:35846859-35873760	+	chr1:35846859	19	5	2	0.105263	0.00718409
chr1:35851042-35854683	+	chr1:35851042	2	1	1	0.5	0.00359205
chr1:35851042-35855699	+	chr1:35851042	2	2	1	0.5	0.00359205
chr1:35944566-35944813	-	chr1:35944813	14	1	9	0.642857	0.0323284
chr1:35940405-35944813	-	chr1:35944813	14	2	4	0.285714	0.0143682
chr1:35936463-35944813	-	chr1:35944813	14	3	1	0.071429	0.00359205
chr1:36469941-36492899	+	chr1:36469941	5	1	4	0.8	0.0143682
chr1:36469941-36479649	+	chr1:36469941	5	2	1	0.2	0.00359205
chr1:36501777-36506042	+	chr1:36501777	6	1	5	0.833333	0.0179602
chr1:36501777-36509149	+	chr1:36501777	6	2	1	0.166667	0.00359205
chr13:70514171-70514368	-	chr13:70514368	22	1	17	0.772727	0.0610648
chr13:70413107-70514368	-	chr13:70514368	22	2	5	0.227273	0.0179602
chr13:75900332-75936743	-	chr13:75936743	21	1	20	0.952381	0.0718409
chr13:75923305-75936743	-	chr13:75936743	21	2	1	0.047619	0.00359205
chr13:77791974-77818086	-	chr13:77818086	13	1	12	0.923077	0.0431045
chr13:77785301-77818086	-	chr13:77818086	13	2	1	0.076923	0.00359205
chr13:80094944-80113910	+	chr13:80094944	23	1	20	0.869565	0.0718409
chr13:80094944-80095110	+	chr13:80094944	23	2	2	0.086957	0.00718409
chr13:80094944-80107591	+	chr13:80094944	23	3	1	0.043478	0.00359205
chr13:92101014-92797242	+	chr13:92101014	5	1	4	0.8	0.0143682
chr13:92101014-92560311	+	chr13:92101014	5	2	1	0.2	0.00359205
chr13:95813442-95840796	-	chr13:95840796	12	1	8	0.666667	0.0287364
chr13:95768175-95840796	-	chr13:95840796	12	2	4	0.333333	0.0143682
chr13:95858785-95863035	-	chr13:95863035	14	1	12	0.857143	0.0431045
chr13:95727685-95863035	-	chr13:95863035	14	2	2	0.142857	0.00718409
chr13:98865473-98865667	+	chr13:98865473	8	1	7	0.875	0.0251443
chr13:98865473-99030172	+	chr13:98865473	8	2	1	0.125	0.00359205
chr13:99061591-99064288	+	chr13:99061591	26	1	16	0.615385	0.0574727
chr13:99061591-99076904	+	chr13:99061591	26	2	10	0.384615	0.0359205
chr1:40654726-40668286	+	chr1:40654726	37	1	33	0.891892	0.118537
chr1:40654726-40656525	+	chr1:40654726	37	2	3	0.081081	0.0107761
chr1:40654726-40688382	+	chr1:40654726	37	3	1	0.027027	0.00359205
chr14:102506572-102507010	+	chr14:102506572	296	1	269	0.908784	0.96626
chr14:102506572-102509085	+	chr14:102506572	296	2	27	0.091216	0.0969852
chr14:102792321-102798183	+	chr14:102792321	9	1	5	0.555556	0.0179602
chr14:102792321-102805560	+	chr14:102792321	9	2	4	0.444444	0.0143682
chr14:103336521-103342862	+	chr14:103336521	6	1	3	0.5	0.0107761
chr14:103336521-103369766	+	chr14:103336521	6	2	3	0.5	0.0107761
chr14:104128452-104129264	+	chr14:104128452	73	1	71	0.972603	0.255035
chr14:104128452-104139768	+	chr14:104128452	73	2	2	0.027397	0.00718409
chr14:104212709-104263855	-	chr14:104263855	3	1	2	0.666667	0.00718409
chr14:104245081-104263855	-	chr14:104263855	3	2	1	0.333333	0.00359205
chr14:104429415-104431891	+	chr14:104429415	2	1	1	0.5	0.00359205
chr14:104429415-104441890	+	chr14:104429415	2	2	1	0.5	0.00359205
chr14:105814829-105821514	+	chr14:105814829	14	1	7	0.5	0.0251443
chr14:105814829-105836237	+	chr14:105814829	14	2	4	0.285714	0.0143682
chr14:105814829-105818804	+	chr14:105814829	14	3	3	0.214286	0.0107761
chr1:41474465-41475926	+	chr1:41474465	6	1	4	0.666667	0.0143682
chr1:41474465-41475261	+	chr1:41474465	6	2	2	0.333333	0.00718409
chr1:41512078-41514562	-	chr1:41514562	4	1	2	0.5	0.00718409
chr1:41503033-41514562	-	chr1:41514562	4	2	1	0.25	0.00359205
chr1:41514361-41514562	-	chr1:41514562	4	3	1	0.25	0.00359205
chr1:41536266-41541123	-	chr1:41541123	160	1	138	0.8625	0.495702
chr1:41512078-41541123	-	chr1:41541123	160	2	22	0.1375	0.079025
chr14:21698477-21731495	-	chr14:21731495	7	1	6	0.857143	0.0215523
chr14:21679564-21731495	-	chr14:21731495	7	2	1	0.142857	0.00359205
chr14:21832985-21841589	-	chr14:21841589	6	1	4	0.666667	0.0143682
chr14:21840032-21841589	-	chr14:21841589	6	2	2	0.333333	0.00718409
chr14:21971315-21972024	-	chr14:21972024	275	1	274	0.996364	0.98422
chr14:21968636-21972024	-	chr14:21972024	275	2	1	0.003636	0.00359205
chr14:23375403-23380612	-	chr14:23380612	103	1	94	0.912621	0.337652
chr14:23378691-23380612	-	chr14:23380612	103	2	9	0.087379	0.0323284
chr1:42693553-42776781	-	chr1:42776781	54	1	29	0.537037	0.104169
chr1:42730785-42776781	-	chr1:42776781	54	2	22	0.407407	0.079025
chr1:42744018-42776781	-	chr1:42776781	54	3	3	0.055556	0.0107761
chr1:42693553-42789498	-	chr1:42789498	17	1	8	0.470588	0.0287364
chr1:42776720-42789498	-	chr1:42789498	17	2	6	0.352941	0.0215523
chr1:42730785-42789498	-	chr1:42789498	17	3	3	0.176471	0.0107761
chr14:31097414-31122794	+	chr14:31097414	3	1	2	0.666667	0.00718409
chr14:31097414-31109070	+	chr14:31097414	3	2	1	0.333333	0.00359205
chr14:31185129-31204064	+	chr14:31185129	6	1	4	0.666667	0.0143682
chr14:31185129-31191765	+	chr14:31185129	6	2	2	0.333333	0.00718409
chr14:31585441-31590711	-	chr14:31590711	42	1	29	0.690476	0.104169
chr14:31588915-31590711	-	chr14:31590711	42	2	9	0.214286	0.0323284
chr14:31590588-31590711	-	chr14:31590711	42	3	4	0.095238	0.0143682
chr14:31596990-31602881	-	chr14:31602881	14	1	9	0.642857	0.0323284
chr14:31602443-31602881	-	chr14:31602881	14	2	4	0.285714	0.0143682
chr14:31592119-31602881	-	chr14:31602881	14	3	1	0.071429	0.00359205
chr14:31596990-31641328	-	chr14:31641328	44	1	38	0.863636	0.136498
chr14:31613316-31641328	-	chr14:31641328	44	2	4	0.090909	0.0143682
chr14:31602443-31641328	-	chr14:31641328	44	3	1	0.022727	0.00359205
chr14:31604077-31641328	-	chr14:31641328	44	4	1	0.022727	0.00359205
chr14:31771500-31777226	-	chr14:31777226	8	1	7	0.875	0.0251443
chr14:31765114-31777226	-	chr14:31777226	8	2	1	0.125	0.00359205
chr14:31841015-31844174	-	chr14:31844174	107	1	70	0.654206	0.251443
chr14:31813101-31844174	-	chr14:31844174	107	2	34	0.317757	0.12213
chr14:31816953-31844174	-	chr14:31844174	107	3	3	0.028037	0.0107761
chr14:31849672-31852977	-	chr14:31852977	8	1	7	0.875	0.0251443
chr14:31771500-31852977	-	chr14:31852977	8	2	1	0.125	0.00359205
chr14:31849672-31856581	-	chr14:31856581	10	1	8	0.8	0.0287364
chr14:31833394-31856581	-	chr14:31856581	10	2	2	0.2	0.00718409
chr14:32559707-32563592	+	chr14:32559707	11	1	6	0.545455	0.0215523
chr14:32559707-32586493	+	chr14:32559707	11	2	5	0.454545	0.0179602
chr14:35331249-35331528	-	chr14:35331528	41	1	31	0.756098	0.111353
chr14:35261980-35331528	-	chr14:35331528	41	2	10	0.243902	0.0359205
chr14:36133847-36143915	-	chr14:36143915	3	1	2	0.666667	0.00718409
chr14:36103779-36143915	-	chr14:36143915	3	2	1	0.333333	0.00359205
chr14:36147155-36194359	-	chr14:36194359	8	1	4	0.5	0.0143682
chr14:36133847-36194359	-	chr14:36194359	8	2	2	0.25	0.00718409
chr14:36121010-36194359	-	chr14:36194359	8	3	1	0.125	0.00359205
chr14:36123572-36194359	-	chr14:36194359	8	4	1	0.125	0.00359205
chr14:37754522-37838829	+	chr14:37754522	13	1	8	0.615385	0.0287364
chr14:37754522-37777724	+	chr14:37754522	13	2	5	0.384615	0.0179602
chr14:39543618-39555110	-	chr14:39555110	2	1	1	0.5	0.00359205
chr14:39554965-39555110	-	chr14:39555110	2	2	1	0.5	0.00359205
chr14:39565101-39565343	-	chr14:39565343	11	1	6	0.545455	0.0215523
chr14:39562390-39565343	-	chr14:39565343	11	2	5	0.454545	0.0179602
chr14:39746137-39796226	+	chr14:39746137	68	1	43	0.632353	0.154458
chr14:39746137-39818181	+	chr14:39746137	68	2	25	0.367647	0.0898011
chr1:44035260-44035449	+	chr1:44035260	5	1	3	0.6	0.0107761
chr1:44035260-44044591	+	chr1:44035260	5	2	2	0.4	0.00718409
chr1:44773981-44785416	-	chr1:44785416	73	1	60	0.821918	0.215523
chr1:44713610-44785416	-	chr1:44785416	73	2	5	0.068493	0.0179602
chr1:44785299-44785416	-	chr1:44785416	73	3	5	0.068493	0.0179602
chr1:44750506-44785416	-	chr1:44785416	73	4	3	0.041096	0.0107761
chr1:44804716-44804994	-	chr1:44804994	40	1	18	0.45	0.0646568
chr1:44773981-44804994	-	chr1:44804994	40	2	12	0.3	0.0431045
chr1:44713610-44804994	-	chr1:44804994	40	3	6	0.15	0.0215523
chr1:44750506-44804994	-	chr1:44804994	40	4	4	0.1	0.0143682
chr1:44713610-44818597	-	chr1:44818597	9	1	6	0.666667	0.0215523
chr1:44750506-44818597	-	chr1:44818597	9	2	2	0.222222	0.00718409
chr1:44804716-44818597	-	chr1:44818597	9	3	1	0.111111	0.00359205
chr14:50130032-50141145	-	chr14:50141145	15	1	7	0.466667	0.0251443
chr14:50136241-50141145	-	chr14:50141145	15	2	7	0.466667	0.0251443
chr14:50116982-50141145	-	chr14:50141145	15	3	1	0.066667	0.00359205
chr14:50641171-50647400	-	chr14:50647400	6	1	4	0.666667	0.0143682
chr14:50647289-50647400	-	chr14:50647400	6	2	2	0.333333	0.00718409
chr14:51107467-51111732	-	chr14:51111732	11	1	10	0.909091	0.0359205
chr14:51101931-51111732	-	chr14:51111732	11	2	1	0.090909	0.00359205
chr14:55448257-55467710	-	chr14:55467710	3	1	2	0.666667	0.00718409
chr14:55451440-55467710	-	chr14:55467710	3	2	1	0.333333	0.00359205
chr1:45553552-45553909	-	chr1:45553909	37	1	25	0.675676	0.0898011
chr1:45524280-45553909	-	chr1:45553909	37	2	4	0.108108	0.0143682
chr1:45525770-45553909	-	chr1:45553909	37	3	3	0.081081	0.0107761
chr1:45508890-45553909	-	chr1:45553909	37	4	2	0.054054	0.00718409
chr1:45516745-45553909	-	chr1:45553909	37	5	2	0.054054	0.00718409
chr1:45485737-45553909	-	chr1:45553909	37	6	1	0.027027	0.00359205
chr14:55844536-55848909	-	chr14:55848909	9	1	7	0.777778	0.0251443
chr14:55847290-55848909	-	chr14:55848909	9	2	2	0.222222	0.00718409
chr1:46056894-46060445	+	chr1:46056894	3	1	2	0.666667	0.00718409
chr1:46056894-46068037	+	chr1:46056894	3	2	1	0.333333	0.00359205
chr1:46105881-46108171	-	chr1:46108171	33	1	32	0.969697	0.114945
chr1:46099160-46108171	-	chr1:46108171	33	2	1	0.030303	0.00359205
chr1:46105881-46120991	-	chr1:46120991	5	1	3	0.6	0.0107761
chr1:46108098-46120991	-	chr1:46120991	5	2	2	0.4	0.00718409
chr14:61262934-61285565	+	chr14:61262934	4	1	2	0.5	0.00718409
chr14:61262934-61346553	+	chr14:61262934	4	2	2	0.5	0.00718409
chr14:63447589-63483672	-	chr14:63483672	109	1	69	0.633028	0.247851
chr14:63416850-63483672	-	chr14:63483672	109	2	32	0.293578	0.114945
chr14:63246445-63483672	-	chr14:63483672	109	3	6	0.055046	0.0215523
chr14:63269046-63483672	-	chr14:63483672	109	4	1	0.009174	0.00359205
chr14:63316370-63483672	-	chr14:63483672	109	5	1	0.009174	0.00359205
chr14:64898249-64908171	+	chr14:64898249	20	1	17	0.85	0.0610648
chr14:64898249-64906984	+	chr14:64898249	20	2	2	0.1	0.00718409
chr14:64898249-64905890	+	chr14:64898249	20	3	1	0.05	0.00359205
chr14:64908771-64916340	+	chr14:64908771	8	1	5	0.625	0.0179602
chr14:64908771-64915035	+	chr14:64908771	8	2	3	0.375	0.0107761
chr14:66028054-66028484	+	chr14:66028054	36	1	30	0.833333	0.107761
chr14:66028054-66096324	+	chr14:66028054	36	2	5	0.138889	0.0179602
chr14:66028054-66200099	+	chr14:66028054	36	3	1	0.027778	0.00359205
chr14:67431907-67490392	+	chr14:67431907	118	1	82	0.694915	0.294548
chr14:67431907-67525503	+	chr14:67431907	118	2	36	0.305085	0.129314
chr14:69356855-69360464	-	chr14:69360464	7	1	5	0.714286	0.0179602
chr14:69347526-69360464	-	chr14:69360464	7	2	2	0.285714	0.00718409
chr14:69919957-69922583	+	chr14:69919957	20	1	10	0.5	0.0359205
chr14:69919957-69921614	+	chr14:69919957	20	2	6	0.3	0.0215523
chr14:69919957-69925446	+	chr14:69919957	20	3	4	0.2	0.0143682
chr1:47030712-47037839	-	chr1:47037839	8	1	6	0.75	0.0215523
chr1:47034114-47037839	-	chr1:47037839	8	2	2	0.25	0.00718409
chr14:70418854-70420249	+	chr14:70418854	9	1	5	0.555556	0.0179602
chr14:70418854-70480208	+	chr14:70418854	9	2	3	0.333333	0.0107761
chr14:70418854-70444682	+	chr14:70418854	9	3	1	0.111111	0.00359205
chr14:70442431-70480208	+	chr14:70442431	28	1	18	0.642857	0.0646568
chr14:70442431-70461197	+	chr14:70442431	28	2	9	0.321429	0.0323284
chr14:70442431-70467460	+	chr14:70442431	28	3	1	0.035714	0.00359205
chr14:70459133-70490164	+	chr14:70459133	23	1	12	0.521739	0.0431045
chr14:70459133-70480208	+	chr14:70459133	23	2	11	0.478261	0.0395125
chr14:71434914-71462642	+	chr14:71434914	5	1	3	0.6	0.0107761
chr14:71434914-71445365	+	chr14:71434914	5	2	2	0.4	0.00718409
chr14:71443658-71479919	+	chr14:71443658	21	1	10	0.47619	0.0359205
chr14:71443658-71445365	+	chr14:71443658	21	2	5	0.238095	0.0179602
chr14:71443658-71462642	+	chr14:71443658	21	3	5	0.238095	0.0179602
chr14:71443658-71478266	+	chr14:71443658	21	4	1	0.047619	0.00359205
chr14:71455283-71462642	+	chr14:71455283	85	1	64	0.752941	0.229891
chr14:71455283-71485879	+	chr14:71455283	85	2	14	0.164706	0.0502886
chr14:71455283-71479919	+	chr14:71455283	85	3	4	0.047059	0.0143682
chr14:71455283-71476441	+	chr14:71455283	85	4	3	0.035294	0.0107761
chr14:71476350-71502874	+	chr14:71476350	38	1	33	0.868421	0.118537
chr14:71476350-71485879	+	chr14:71476350	38	2	5	0.131579	0.0179602
chr14:71511849-71524441	+	chr14:71511849	73	1	49	0.671233	0.17601
chr14:71511849-71543136	+	chr14:71511849	73	2	21	0.287671	0.075433
chr14:71511849-71556059	+	chr14:71511849	73	3	3	0.041096	0.0107761
chr1:47148971-47157609	-	chr1:47157609	5	1	4	0.8	0.0143682
chr1:47130927-47157609	-	chr1:47157609	5	2	1	0.2	0.00359205
chr14:71880664-71884913	+	chr14:71880664	95	1	67	0.705263	0.240667
chr14:71880664-71996087	+	chr14:71880664	95	2	20	0.210526	0.0718409
chr14:71880664-72043304	+	chr14:71880664	95	3	4	0.042105	0.0143682
chr14:71880664-71979562	+	chr14:71880664	95	4	2	0.021053	0.00718409
chr14:71880664-72090953	+	chr14:71880664	95	5	2	0.021053	0.00718409
chr14:71979459-71996087	+	chr14:71979459	8	1	5	0.625	0.0179602
chr14:71979459-72090953	+	chr14:71979459	8	2	3	0.375	0.0107761
chr14:72054287-72090953	+	chr14:72054287	23	1	18	0.782609	0.0646568
chr14:72054287-72056087	+	chr14:72054287	23	2	5	0.217391	0.0179602
chr14:72125049-72139339	+	chr14:72125049	11	1	9	0.818182	0.0323284
chr14:72125049-72176381	+	chr14:72125049	11	2	2	0.181818	0.00718409
chr14:73459850-73460065	-	chr14:73460065	13	1	12	0.923077	0.0431045
chr14:73445568-73460065	-	chr14:73460065	13	2	1	0.076923	0.00359205
chr14:73538334-73544244	+	chr14:73538334	6	1	3	0.5	0.0107761
chr14:73538334-73543076	+	chr14:73538334	6	2	2	0.333333	0.00718409
chr14:73538334-73538455	+	chr14:73538334	6	3	1	0.166667	0.00359205
chr14:73614502-73614802	+	chr14:73614502	225	1	111	0.493333	0.398717
chr14:73614502-73614814	+	chr14:73614502	225	2	74	0.328889	0.265811
chr14:73614502-73640415	+	chr14:73614502	225	3	30	0.133333	0.107761
chr14:73614502-73664837	+	chr14:73614502	225	4	7	0.031111	0.0251443
chr14:73614502-73626846	+	chr14:73614502	225	5	3	0.013333	0.0107761
chr14:74358729-74376133	+	chr14:74358729	17	1	9	0.529412	0.0323284
chr14:74358729-74360635	+	chr14:74358729	17	2	8	0.470588	0.0287364
chr14:75247107-75269379	+	chr14:75247107	11	1	8	0.727273	0.0287364
chr14:75247107-75249028	+	chr14:75247107	11	2	3	0.272727	0.0107761
chr14:75567694-75570700	-	chr14:75570700	28	1	18	0.642857	0.0646568
chr14:75563802-75570700	-	chr14:75570700	28	2	10	0.357143	0.0359205
chr14:75562074-75590926	-	chr14:75590926	53	1	20	0.377358	0.0718409
chr14:75590748-75590926	-	chr14:75590926	53	2	14	0.264151	0.0502886
chr14:75576387-75590926	-	chr14:75590926	53	3	11	0.207547	0.0395125
chr14:75573168-75590926	-	chr14:75590926	53	4	5	0.09434	0.0179602
chr14:75577023-75590926	-	chr14:75590926	53	5	3	0.056604	0.0107761
chr14:76173360-76187046	+	chr14:76173360	10	1	5	0.5	0.0179602
chr14:76173360-76201632	+	chr14:76173360	10	2	4	0.4	0.0143682
chr14:76173360-76203950	+	chr14:76173360	10	3	1	0.1	0.00359205
chr14:76198680-76201632	+	chr14:76198680	13	1	12	0.923077	0.0431045
chr14:76198680-76203950	+	chr14:76198680	13	2	1	0.076923	0.00359205
chr14:76633005-76662315	+	chr14:76633005	37	1	24	0.648649	0.0862091
chr14:76633005-76647192	+	chr14:76633005	37	2	13	0.351351	0.0466966
chr14:76638185-76647192	+	chr14:76638185	14	1	12	0.857143	0.0431045
chr14:76638185-76643033	+	chr14:76638185	14	2	2	0.142857	0.00718409
chr1:47728574-47737913	-	chr1:47737913	5	1	4	0.8	0.0143682
chr1:47725960-47737913	-	chr1:47737913	5	2	1	0.2	0.00359205
chr1:47745912-47748131	-	chr1:47748131	66	1	63	0.954545	0.226299
chr1:47737747-47748131	-	chr1:47748131	66	2	3	0.045455	0.0107761
chr1:47745912-47770668	-	chr1:47770668	5	1	4	0.8	0.0143682
chr1:47728574-47770668	-	chr1:47770668	5	2	1	0.2	0.00359205
chr14:77930940-77932010	+	chr14:77930940	16	1	14	0.875	0.0502886
chr14:77930940-77934851	+	chr14:77930940	16	2	2	0.125	0.00718409
chr14:91939376-91939714	-	chr14:91939714	8	1	5	0.625	0.0179602
chr14:91937180-91939714	-	chr14:91939714	8	2	3	0.375	0.0107761
chr14:93418290-93429194	-	chr14:93429194	4	1	3	0.75	0.0107761
chr14:93428699-93429194	-	chr14:93429194	4	2	1	0.25	0.00359205
chr14:93412675-93460342	-	chr14:93460342	17	1	10	0.588235	0.0359205
chr14:93460224-93460342	-	chr14:93460342	17	2	7	0.411765	0.0251443
chr14:96807858-96813678	-	chr14:96813678	26	1	22	0.846154	0.079025
chr14:96755992-96813678	-	chr14:96813678	26	2	3	0.115385	0.0107761
chr14:96781490-96813678	-	chr14:96813678	26	3	1	0.038462	0.00359205
chr14:97299803-97327072	+	chr14:97299803	7	1	4	0.571429	0.0143682
chr14:97299803-97304154	+	chr14:97299803	7	2	2	0.285714	0.00718409
chr14:97299803-97322923	+	chr14:97299803	7	3	1	0.142857	0.00359205
chr15:101906400-101910728	-	chr15:101910728	91	1	80	0.879121	0.287364
chr15:101905203-101910728	-	chr15:101910728	91	2	9	0.098901	0.0323284
chr15:101853580-101910728	-	chr15:101910728	91	3	2	0.021978	0.00718409
chr1:51032748-51061888	-	chr1:51061888	34	1	17	0.5	0.0610648
chr1:51001040-51061888	-	chr1:51061888	34	2	12	0.352941	0.0431045
chr1:51005263-51061888	-	chr1:51061888	34	3	5	0.147059	0.0179602
chr15:20671447-20671623	-	chr15:20671623	41	1	39	0.95122	0.14009
chr15:20657620-20671623	-	chr15:20671623	41	2	1	0.02439	0.00359205
chr15:20666444-20671623	-	chr15:20671623	41	3	1	0.02439	0.00359205
chr1:52215816-52237854	+	chr1:52215816	7	1	4	0.571429	0.0143682
chr1:52215816-52238395	+	chr1:52215816	7	2	2	0.285714	0.00718409
chr1:52215816-52231653	+	chr1:52215816	7	3	1	0.142857	0.00359205
chr1:52226361-52231653	+	chr1:52226361	4	1	2	0.5	0.00718409
chr1:52226361-52248315	+	chr1:52226361	4	2	2	0.5	0.00718409
chr1:52231493-52231653	+	chr1:52231493	8	1	6	0.75	0.0215523
chr1:52231493-52237854	+	chr1:52231493	8	2	2	0.25	0.00718409
chr1:52293467-52299842	-	chr1:52299842	15	1	12	0.8	0.0431045
chr1:52283737-52299842	-	chr1:52299842	15	2	3	0.2	0.0107761
chr15:23338852-23339028	-	chr15:23339028	35	1	31	0.885714	0.111353
chr15:23325023-23339028	-	chr15:23339028	35	2	2	0.057143	0.00718409
chr15:23333848-23339028	-	chr15:23339028	35	3	2	0.057143	0.00718409
chr1:52937623-52975384	-	chr1:52975384	3	1	2	0.666667	0.00718409
chr1:52959282-52975384	-	chr1:52975384	3	2	1	0.333333	0.00359205
chr15:32498464-32500399	-	chr15:32500399	10	1	9	0.9	0.0323284
chr15:32499453-32500399	-	chr15:32500399	10	2	1	0.1	0.00359205
chr1:53326402-53333449	+	chr1:53326402	19	1	14	0.736842	0.0502886
chr1:53326402-53352725	+	chr1:53326402	19	2	4	0.210526	0.0143682
chr1:53326402-53358647	+	chr1:53326402	19	3	1	0.052632	0.00359205
chr15:35152242-35159810	-	chr15:35159810	17	1	15	0.882353	0.0538807
chr15:35155067-35159810	-	chr15:35159810	17	2	2	0.117647	0.00718409
chr15:41001222-41021022	+	chr15:41001222	21	1	19	0.904762	0.0682489
chr15:41001222-41011097	+	chr15:41001222	21	2	2	0.095238	0.00718409
chr15:41289726-41319934	-	chr15:41319934	35	1	14	0.4	0.0502886
chr15:41313097-41319934	-	chr15:41319934	35	2	11	0.314286	0.0395125
chr15:41297790-41319934	-	chr15:41319934	35	3	10	0.285714	0.0359205
chr15:41377566-41379880	-	chr15:41379880	5	1	3	0.6	0.0107761
chr15:41371898-41379880	-	chr15:41379880	5	2	2	0.4	0.00718409
chr15:41289726-41388551	-	chr15:41388551	8	1	3	0.375	0.0107761
chr15:41361767-41388551	-	chr15:41388551	8	2	3	0.375	0.0107761
chr15:41341484-41388551	-	chr15:41388551	8	3	2	0.25	0.00718409
chr15:41535864-41562816	+	chr15:41535864	9	1	5	0.555556	0.0179602
chr15:41535864-41555081	+	chr15:41535864	9	2	4	0.444444	0.0143682
chr15:41961025-41962156	+	chr15:41961025	98	1	82	0.836735	0.294548
chr15:41961025-42005694	+	chr15:41961025	98	2	13	0.132653	0.0466966
chr15:41961025-41991357	+	chr15:41961025	98	3	3	0.030612	0.0107761
chr15:41988272-41991357	+	chr15:41988272	77	1	58	0.753247	0.208339
chr15:41988272-42032401	+	chr15:41988272	77	2	9	0.116883	0.0323284
chr15:41988272-41989221	+	chr15:41988272	77	3	6	0.077922	0.0215523
chr15:41988272-42005694	+	chr15:41988272	77	4	2	0.025974	0.00718409
chr15:41988272-42028896	+	chr15:41988272	77	5	2	0.025974	0.00718409
chr15:42019377-42032401	+	chr15:42019377	3	1	2	0.666667	0.00718409
chr15:42019377-42021547	+	chr15:42019377	3	2	1	0.333333	0.00359205
chr15:42531867-42560230	-	chr15:42560230	3	1	2	0.666667	0.00718409
chr15:42553155-42560230	-	chr15:42560230	3	2	1	0.333333	0.00359205
chr1:54275367-54293846	-	chr1:54293846	20	1	7	0.35	0.0251443
chr1:54272097-54293846	-	chr1:54293846	20	2	5	0.25	0.0179602
chr1:54291470-54293846	-	chr1:54293846	20	3	4	0.2	0.0143682
chr1:54252830-54293846	-	chr1:54293846	20	4	3	0.15	0.0107761
chr1:54269600-54293846	-	chr1:54293846	20	5	1	0.05	0.00359205
chr1:54252830-54298264	-	chr1:54298264	2	1	1	0.5	0.00359205
chr1:54275367-54298264	-	chr1:54298264	2	2	1	0.5	0.00359205
chr15:43120125-43132631	-	chr15:43132631	61	1	53	0.868852	0.190378
chr15:43122135-43132631	-	chr15:43132631	61	2	6	0.098361	0.0215523
chr15:43086841-43132631	-	chr15:43132631	61	3	1	0.016393	0.00359205
chr15:43102811-43132631	-	chr15:43132631	61	4	1	0.016393	0.00359205
chr15:43242459-43262805	-	chr15:43262805	6	1	3	0.5	0.0107761
chr15:43250210-43262805	-	chr15:43262805	6	2	3	0.5	0.0107761
chr15:43281016-43317627	-	chr15:43317627	4	1	3	0.75	0.0107761
chr15:43313472-43317627	-	chr15:43317627	4	2	1	0.25	0.00359205
chr15:43668295-43669265	+	chr15:43668295	32	1	29	0.90625	0.104169
chr15:43668295-43668823	+	chr15:43668295	32	2	2	0.0625	0.00718409
chr15:43668295-43672361	+	chr15:43668295	32	3	1	0.03125	0.00359205
chr15:43724391-43730614	-	chr15:43730614	8	1	5	0.625	0.0179602
chr15:43712502-43730614	-	chr15:43730614	8	2	3	0.375	0.0107761
chr15:44884528-44889141	-	chr15:44889141	7	1	6	0.857143	0.0215523
chr15:44887456-44889141	-	chr15:44889141	7	2	1	0.142857	0.00359205
chr15:44876011-44892830	-	chr15:44892830	9	1	8	0.888889	0.0287364
chr15:44884528-44892830	-	chr15:44892830	9	2	1	0.111111	0.00359205
chr15:44907560-44912601	-	chr15:44912601	9	1	7	0.777778	0.0251443
chr15:44898222-44912601	-	chr15:44912601	9	2	2	0.222222	0.00718409
chr15:44905627-44949461	-	chr15:44949461	27	1	9	0.333333	0.0323284
chr15:44892664-44949461	-	chr15:44949461	27	2	6	0.222222	0.0215523
chr15:44907560-44949461	-	chr15:44949461	27	3	3	0.111111	0.0107761
chr15:44941063-44949461	-	chr15:44949461	27	4	3	0.111111	0.0107761
chr15:44898222-44949461	-	chr15:44949461	27	5	2	0.074074	0.00718409
chr15:44900641-44949461	-	chr15:44949461	27	6	2	0.074074	0.00718409
chr15:44918528-44949461	-	chr15:44949461	27	7	2	0.074074	0.00718409
chr15:49517401-49531564	+	chr15:49517401	102	1	73	0.715686	0.262219
chr15:49517401-49620327	+	chr15:49517401	102	2	29	0.284314	0.104169
chr15:49528047-49531564	+	chr15:49528047	56	1	32	0.571429	0.114945
chr15:49528047-49584734	+	chr15:49528047	56	2	15	0.267857	0.0538807
chr15:49528047-49620327	+	chr15:49528047	56	3	7	0.125	0.0251443
chr15:49528047-49575915	+	chr15:49528047	56	4	1	0.017857	0.00359205
chr15:49528047-49612002	+	chr15:49528047	56	5	1	0.017857	0.00359205
chr15:50592985-50596330	-	chr15:50596330	19	1	17	0.894737	0.0610648
chr15:50596162-50596330	-	chr15:50596330	19	2	2	0.105263	0.00718409
chr15:50935536-50955243	-	chr15:50955243	8	1	3	0.375	0.0107761
chr15:50949977-50955243	-	chr15:50955243	8	2	3	0.375	0.0107761
chr15:50923613-50955243	-	chr15:50955243	8	3	1	0.125	0.00359205
chr15:50940883-50955243	-	chr15:50955243	8	4	1	0.125	0.00359205
chr1:55330975-55340884	-	chr1:55340884	3	1	2	0.666667	0.00718409
chr1:55337022-55340884	-	chr1:55340884	3	2	1	0.333333	0.00359205
chr1:55340765-55341720	-	chr1:55341720	125	1	77	0.616	0.276587
chr1:55330975-55341720	-	chr1:55341720	125	2	24	0.192	0.0862091
chr1:55337022-55341720	-	chr1:55341720	125	3	24	0.192	0.0862091
chr15:55619728-55634000	+	chr15:55619728	7	1	5	0.714286	0.0179602
chr15:55619728-55626205	+	chr15:55619728	7	2	2	0.285714	0.00718409
chr15:57212089-57384089	+	chr15:57212089	4	1	2	0.5	0.00718409
chr15:57212089-57458664	+	chr15:57212089	4	2	2	0.5	0.00718409
chr15:59323002-59359282	+	chr15:59323002	20	1	9	0.45	0.0323284
chr15:59323002-59350749	+	chr15:59323002	20	2	4	0.2	0.0143682
chr15:59323002-59368414	+	chr15:59323002	20	3	4	0.2	0.0143682
chr15:59323002-59323901	+	chr15:59323002	20	4	3	0.15	0.0107761
chr15:59376327-59377984	+	chr15:59376327	15	1	10	0.666667	0.0359205
chr15:59376327-59381958	+	chr15:59376327	15	2	5	0.333333	0.0179602
chr15:59487659-59510286	-	chr15:59510286	10	1	7	0.7	0.0251443
chr15:59480316-59510286	-	chr15:59510286	10	2	2	0.2	0.00718409
chr15:59470591-59510286	-	chr15:59510286	10	3	1	0.1	0.00359205
chr15:59470591-59548577	-	chr15:59548577	4	1	3	0.75	0.0107761
chr15:59528783-59548577	-	chr15:59548577	4	2	1	0.25	0.00359205
chr15:59510089-59564648	-	chr15:59564648	125	1	110	0.88	0.395125
chr15:59548482-59564648	-	chr15:59564648	125	2	10	0.08	0.0359205
chr15:59515257-59564648	-	chr15:59564648	125	3	5	0.04	0.0179602
chr15:60653139-60674640	-	chr15:60674640	8	1	7	0.875	0.0251443
chr15:60648117-60674640	-	chr15:60674640	8	2	1	0.125	0.00359205
chr15:60646352-60678285	-	chr15:60678285	4	1	2	0.5	0.00718409
chr15:60649344-60678285	-	chr15:60678285	4	2	2	0.5	0.00718409
chr15:63821212-63829355	+	chr15:63821212	31	1	18	0.580645	0.0646568
chr15:63821212-63855207	+	chr15:63821212	31	2	13	0.419355	0.0466966
chr15:63824845-63855207	+	chr15:63824845	49	1	29	0.591837	0.104169
chr15:63824845-63852169	+	chr15:63824845	49	2	17	0.346939	0.0610648
chr15:63824845-63866602	+	chr15:63824845	49	3	2	0.040816	0.00718409
chr15:63824845-63829355	+	chr15:63824845	49	4	1	0.020408	0.00359205
chr15:63915013-63958671	-	chr15:63958671	6	1	4	0.666667	0.0143682
chr15:63951934-63958671	-	chr15:63958671	6	2	2	0.333333	0.00718409
chr15:63953171-63967292	-	chr15:63967292	8	1	7	0.875	0.0251443
chr15:63956668-63967292	-	chr15:63967292	8	2	1	0.125	0.00359205
chr15:63988322-64008672	-	chr15:64008672	23	1	18	0.782609	0.0646568
chr15:63929703-64008672	-	chr15:64008672	23	2	4	0.173913	0.0143682
chr15:63998978-64008672	-	chr15:64008672	23	3	1	0.043478	0.00359205
chr15:64404771-64429131	+	chr15:64404771	8	1	6	0.75	0.0215523
chr15:64404771-64411053	+	chr15:64404771	8	2	2	0.25	0.00718409
chr15:64410315-64411053	+	chr15:64410315	12	1	9	0.75	0.0323284
chr15:64410315-64415745	+	chr15:64410315	12	2	3	0.25	0.0107761
chr15:65040617-65043837	-	chr15:65043837	5	1	4	0.8	0.0143682
chr15:65042541-65043837	-	chr15:65043837	5	2	1	0.2	0.00359205
chr15:65266939-65275931	-	chr15:65275931	25	1	19	0.76	0.0682489
chr15:65273201-65275931	-	chr15:65275931	25	2	6	0.24	0.0215523
chr15:65759015-65759561	-	chr15:65759561	9	1	7	0.777778	0.0251443
chr15:65756098-65759561	-	chr15:65759561	9	2	2	0.222222	0.00718409
chr15:65766546-65772737	-	chr15:65772737	16	1	7	0.4375	0.0251443
chr15:65771217-65772737	-	chr15:65772737	16	2	5	0.3125	0.0179602
chr15:65746600-65772737	-	chr15:65772737	16	3	2	0.125	0.00718409
chr15:65759015-65772737	-	chr15:65772737	16	4	2	0.125	0.00718409
chr15:65756098-65782637	-	chr15:65782637	2	1	1	0.5	0.00359205
chr15:65780027-65782637	-	chr15:65782637	2	2	1	0.5	0.00359205
chr15:65782526-65790370	-	chr15:65790370	9	1	8	0.888889	0.0287364
chr15:65790201-65790370	-	chr15:65790370	9	2	1	0.111111	0.00359205
chr15:65962116-65962526	-	chr15:65962526	13	1	11	0.846154	0.0395125
chr15:65959786-65962526	-	chr15:65962526	13	2	2	0.153846	0.00718409
chr15:66021409-66025156	-	chr15:66025156	9	1	4	0.444444	0.0143682
chr15:65998428-66025156	-	chr15:66025156	9	2	3	0.333333	0.0107761
chr15:66015185-66025156	-	chr15:66025156	9	3	2	0.222222	0.00718409
chr15:66021409-66031213	-	chr15:66031213	16	1	13	0.8125	0.0466966
chr15:65998428-66031213	-	chr15:66031213	16	2	2	0.125	0.00718409
chr15:66007815-66031213	-	chr15:66031213	16	3	1	0.0625	0.00359205
chr15:66021409-66053776	-	chr15:66053776	5	1	3	0.6	0.0107761
chr15:65959786-66053776	-	chr15:66053776	5	2	2	0.4	0.00718409
chr15:66599161-66607553	+	chr15:66599161	5	1	3	0.6	0.0107761
chr15:66599161-66601182	+	chr15:66599161	5	2	2	0.4	0.00718409
chr15:67004005-67008836	+	chr15:67004005	114	1	100	0.877193	0.359205
chr15:67004005-67009478	+	chr15:67004005	114	2	14	0.122807	0.0502886
chr15:67457232-67462942	+	chr15:67457232	12	1	9	0.75	0.0323284
chr15:67457232-67459191	+	chr15:67457232	12	2	3	0.25	0.0107761
chr15:67524151-67529158	-	chr15:67529158	40	1	31	0.775	0.111353
chr15:67500899-67529158	-	chr15:67529158	40	2	9	0.225	0.0323284
chr15:67873091-67893087	+	chr15:67873091	9	1	8	0.888889	0.0287364
chr15:67873091-67923265	+	chr15:67873091	9	2	1	0.111111	0.00359205
chr15:67984816-67995746	+	chr15:67984816	11	1	6	0.545455	0.0215523
chr15:67984816-67985906	+	chr15:67984816	11	2	5	0.454545	0.0179602
chr15:68503600-68510988	-	chr15:68510988	26	1	12	0.461538	0.0431045
chr15:68501974-68510988	-	chr15:68510988	26	2	9	0.346154	0.0323284
chr15:68506627-68510988	-	chr15:68510988	26	3	5	0.192308	0.0179602
chr1:56989494-57002784	-	chr1:57002784	5	1	4	0.8	0.0143682
chr1:56977647-57002784	-	chr1:57002784	5	2	1	0.2	0.00359205
chr15:72509749-72511451	-	chr15:72511451	55	1	42	0.763636	0.150866
chr15:72502013-72511451	-	chr15:72511451	55	2	8	0.145455	0.0287364
chr15:72499068-72511451	-	chr15:72511451	55	3	5	0.090909	0.0179602
chr15:72542360-72559163	-	chr15:72559163	5	1	4	0.8	0.0143682
chr15:72557421-72559163	-	chr15:72559163	5	2	1	0.2	0.00359205
chr15:72543547-72563445	-	chr15:72563445	8	1	3	0.375	0.0107761
chr15:72542360-72563445	-	chr15:72563445	8	2	2	0.25	0.00718409
chr15:72551948-72563445	-	chr15:72563445	8	3	2	0.25	0.00718409
chr15:72534241-72563445	-	chr15:72563445	8	4	1	0.125	0.00359205
chr15:73052747-73067438	-	chr15:73067438	34	1	25	0.735294	0.0898011
chr15:73064123-73067438	-	chr15:73067438	34	2	9	0.264706	0.0323284
chr15:74911537-74921373	+	chr15:74911537	6	1	5	0.833333	0.0179602
chr15:74911537-74917359	+	chr15:74911537	6	2	1	0.166667	0.00359205
chr15:75219106-75221573	-	chr15:75221573	48	1	46	0.958333	0.165234
chr15:75215988-75221573	-	chr15:75221573	48	2	2	0.041667	0.00718409
chr15:75706545-75715164	-	chr15:75715164	16	1	10	0.625	0.0359205
chr15:75714987-75715164	-	chr15:75715164	16	2	4	0.25	0.0143682
chr15:75693070-75715164	-	chr15:75715164	16	3	2	0.125	0.00718409
chr15:75714987-75722749	-	chr15:75722749	15	1	8	0.533333	0.0287364
chr15:75722527-75722749	-	chr15:75722749	15	2	7	0.466667	0.0251443
chr15:75798015-75819602	-	chr15:75819602	37	1	16	0.432432	0.0574727
chr15:75809599-75819602	-	chr15:75819602	37	2	11	0.297297	0.0395125
chr15:75815461-75819602	-	chr15:75819602	37	3	10	0.27027	0.0359205
chr15:76580186-76585041	-	chr15:76585041	54	1	32	0.592593	0.114945
chr15:76576097-76585041	-	chr15:76585041	54	2	15	0.277778	0.0538807
chr15:76584771-76585041	-	chr15:76585041	54	3	7	0.12963	0.0251443
chr15:76584771-76588078	-	chr15:76588078	352	1	181	0.514205	0.65016
chr15:76566752-76588078	-	chr15:76588078	352	2	135	0.383523	0.484926
chr15:76576097-76588078	-	chr15:76588078	352	3	20	0.056818	0.0718409
chr15:76580186-76588078	-	chr15:76588078	352	4	12	0.034091	0.0431045
chr15:76577977-76588078	-	chr15:76588078	352	5	3	0.008523	0.0107761
chr15:76587931-76588078	-	chr15:76588078	352	6	1	0.002841	0.00359205
chr15:80390757-80415142	+	chr15:80390757	16	1	12	0.75	0.0431045
chr15:80390757-80414162	+	chr15:80390757	16	2	4	0.25	0.0143682
chr15:81166204-81201647	+	chr15:81166204	3	1	2	0.666667	0.00718409
chr15:81166204-81212640	+	chr15:81166204	3	2	1	0.333333	0.00359205
chr15:85607600-85610435	+	chr15:85607600	84	1	83	0.988095	0.29814
chr15:85607600-85620018	+	chr15:85607600	84	2	1	0.011905	0.00359205
chr15:85657103-85658718	+	chr15:85657103	77	1	37	0.480519	0.132906
chr15:85657103-85664245	+	chr15:85657103	77	2	36	0.467532	0.129314
chr15:85657103-85661070	+	chr15:85657103	77	3	2	0.025974	0.00718409
chr15:85657103-85669605	+	chr15:85657103	77	4	2	0.025974	0.00718409
chr15:90431752-90432372	-	chr15:90432372	17	1	9	0.529412	0.0323284
chr15:90414706-90432372	-	chr15:90432372	17	2	8	0.470588	0.0287364
chr15:90760670-90764997	+	chr15:90760670	85	1	60	0.705882	0.215523
chr15:90760670-90763123	+	chr15:90760670	85	2	24	0.282353	0.0862091
chr15:90760670-90770874	+	chr15:90760670	85	3	1	0.011765	0.00359205
chr15:92638110-92671719	+	chr15:92638110	15	1	9	0.6	0.0323284
chr15:92638110-92647772	+	chr15:92638110	15	2	3	0.2	0.0107761
chr15:92638110-92706228	+	chr15:92638110	15	3	3	0.2	0.0107761
chr15:92663694-92694244	+	chr15:92663694	5	1	3	0.6	0.0107761
chr15:92663694-92671719	+	chr15:92663694	5	2	2	0.4	0.00718409
chr15:93467550-93499879	+	chr15:93467550	9	1	6	0.666667	0.0215523
chr15:93467550-93472321	+	chr15:93467550	9	2	2	0.222222	0.00718409
chr15:93467550-93510743	+	chr15:93467550	9	3	1	0.111111	0.00359205
chr1:59787207-59812070	+	chr1:59787207	21	1	13	0.619048	0.0466966
chr1:59787207-59844509	+	chr1:59787207	21	2	5	0.238095	0.0179602
chr1:59787207-59805741	+	chr1:59787207	21	3	2	0.095238	0.00718409
chr1:59787207-60139805	+	chr1:59787207	21	4	1	0.047619	0.00359205
chr1:59805629-59844509	+	chr1:59805629	16	1	14	0.875	0.0502886
chr1:59805629-59812070	+	chr1:59805629	16	2	2	0.125	0.00718409
chr15:99250790-99251336	+	chr15:99250790	634	1	612	0.9653	2.19833
chr15:99250790-99442850	+	chr15:99250790	634	2	14	0.022082	0.0502886
chr15:99250790-99491937	+	chr15:99250790	634	3	6	0.009464	0.0215523
chr15:99250790-99460105	+	chr15:99250790	634	4	2	0.003155	0.00718409
chr1:5987708-5993389	-	chr1:5993389	40	1	22	0.55	0.079025
chr1:5964676-5993389	-	chr1:5993389	40	2	18	0.45	0.0646568
chr1:6021853-6029319	-	chr1:6029319	19	1	18	0.947368	0.0646568
chr1:6027358-6029319	-	chr1:6029319	19	2	1	0.052632	0.00359205
chr1:6021853-6046387	-	chr1:6046387	56	1	43	0.767857	0.154458
chr1:6007163-6046387	-	chr1:6046387	56	2	9	0.160714	0.0323284
chr1:5964676-6046387	-	chr1:6046387	56	3	2	0.035714	0.00718409
chr1:5987708-6046387	-	chr1:6046387	56	4	1	0.017857	0.00359205
chr1:6038329-6046387	-	chr1:6046387	56	5	1	0.017857	0.00359205
chr16:1004356-1004666	-	chr16:1004666	415	1	308	0.742169	1.10635
chr16:984189-1004666	-	chr16:1004666	415	2	52	0.125301	0.186786
chr16:960930-1004666	-	chr16:1004666	415	3	36	0.086747	0.129314
chr16:929569-1004666	-	chr16:1004666	415	4	9	0.021687	0.0323284
chr16:981641-1004666	-	chr16:1004666	415	5	5	0.012048	0.0179602
chr16:983990-1004666	-	chr16:1004666	415	6	5	0.012048	0.0179602
chr16:11114049-11118778	+	chr16:11114049	119	1	58	0.487395	0.208339
chr16:11114049-11154879	+	chr16:11114049	119	2	40	0.336134	0.143682
chr16:11114049-11220003	+	chr16:11114049	119	3	13	0.109244	0.0466966
chr16:11114049-11145498	+	chr16:11114049	119	4	7	0.058824	0.0251443
chr16:11114049-11146581	+	chr16:11114049	119	5	1	0.008403	0.00359205
chr16:11217598-11220003	+	chr16:11217598	4	1	3	0.75	0.0107761
chr16:11217598-11217803	+	chr16:11217598	4	2	1	0.25	0.00359205
chr16:11778020-11794420	-	chr16:11794420	7	1	5	0.714286	0.0179602
chr16:11791980-11794420	-	chr16:11794420	7	2	2	0.285714	0.00718409
chr16:11815432-11830089	-	chr16:11830089	14	1	10	0.714286	0.0359205
chr16:11824500-11830089	-	chr16:11830089	14	2	4	0.285714	0.0143682
chr16:11868091-11876244	-	chr16:11876244	2	1	1	0.5	0.00359205
chr16:11870175-11876244	-	chr16:11876244	2	2	1	0.5	0.00359205
chr16:12155384-12162989	+	chr16:12155384	4	1	2	0.5	0.00718409
chr16:12155384-12172772	+	chr16:12155384	4	2	2	0.5	0.00718409
chr16:1447178-1453345	-	chr16:1453345	9	1	5	0.555556	0.0179602
chr16:1416018-1453345	-	chr16:1453345	9	2	4	0.444444	0.0143682
chr16:14645877-14649566	-	chr16:14649566	17	1	14	0.823529	0.0502886
chr16:14647921-14649566	-	chr16:14649566	17	2	2	0.117647	0.00718409
chr16:14576494-14649566	-	chr16:14649566	17	3	1	0.058824	0.00359205
chr16:14720962-14721193	-	chr16:14721193	16	1	14	0.875	0.0502886
chr16:14674730-14721193	-	chr16:14721193	16	2	2	0.125	0.00718409
chr16:15102635-15111279	+	chr16:15102635	9	1	5	0.555556	0.0179602
chr16:15102635-15112822	+	chr16:15102635	9	2	2	0.222222	0.00718409
chr16:15102635-15116611	+	chr16:15102635	9	3	2	0.222222	0.00718409
chr16:15132430-15141956	-	chr16:15141956	3	1	2	0.666667	0.00718409
chr16:15141298-15141956	-	chr16:15141956	3	2	1	0.333333	0.00359205
chr16:15709686-15716983	-	chr16:15716983	5	1	4	0.8	0.0143682
chr16:15705448-15716983	-	chr16:15716983	5	2	1	0.2	0.00359205
chr16:16101672-16110478	+	chr16:16101672	147	1	52	0.353741	0.186786
chr16:16101672-16101849	+	chr16:16101672	147	2	41	0.278912	0.147274
chr16:16101672-16103758	+	chr16:16101672	147	3	29	0.197279	0.104169
chr16:16101672-16108485	+	chr16:16101672	147	4	9	0.061224	0.0323284
chr16:16101672-16130460	+	chr16:16101672	147	5	9	0.061224	0.0323284
chr16:16101672-16184445	+	chr16:16101672	147	6	7	0.047619	0.0251443
chr16:16180680-16184445	+	chr16:16180680	15	1	8	0.533333	0.0287364
chr16:16180680-16205439	+	chr16:16180680	15	2	5	0.333333	0.0179602
chr16:16180680-16192759	+	chr16:16180680	15	3	1	0.066667	0.00359205
chr16:16180680-16196574	+	chr16:16180680	15	4	1	0.066667	0.00359205
chr16:16200594-16205439	+	chr16:16200594	40	1	37	0.925	0.132906
chr16:16200594-16208933	+	chr16:16200594	40	2	3	0.075	0.0107761
chr16:16295857-16306103	-	chr16:16306103	4	1	3	0.75	0.0107761
chr16:16302584-16306103	-	chr16:16306103	4	2	1	0.25	0.00359205
chr16:1675973-1682366	+	chr16:1675973	12	1	5	0.416667	0.0179602
chr16:1675973-1687908	+	chr16:1675973	12	2	5	0.416667	0.0179602
chr16:1675973-1691188	+	chr16:1675973	12	3	2	0.166667	0.00718409
chr1:61743191-61872399	+	chr1:61743191	10	1	5	0.5	0.0179602
chr1:61743191-61892228	+	chr1:61743191	10	2	5	0.5	0.0179602
chr16:1872300-1873038	-	chr16:1873038	29	1	28	0.965517	0.100577
chr16:1859754-1873038	-	chr16:1873038	29	2	1	0.034483	0.00359205
chr16:18840607-18856973	-	chr16:18856973	3	1	2	0.666667	0.00718409
chr16:18844261-18856973	-	chr16:18856973	3	2	1	0.333333	0.00359205
chr16:2106196-2108874	+	chr16:2106196	27	1	24	0.888889	0.0862091
chr16:2106196-2107179	+	chr16:2106196	27	2	3	0.111111	0.0107761
chr16:2115519-2124390	+	chr16:2115519	2	1	1	0.5	0.00359205
chr16:2115519-2130378	+	chr16:2115519	2	2	1	0.5	0.00359205
chr16:21973780-21987564	+	chr16:21973780	45	1	36	0.8	0.129314
chr16:21973780-21983443	+	chr16:21973780	45	2	9	0.2	0.0323284
chr16:22268068-22271850	+	chr16:22268068	21	1	18	0.857143	0.0646568
chr16:22268068-22270016	+	chr16:22268068	21	2	3	0.142857	0.0107761
chr16:22319468-22320831	+	chr16:22319468	108	1	86	0.796296	0.308916
chr16:22319468-22320826	+	chr16:22319468	108	2	22	0.203704	0.079025
chr16:22324940-22326529	+	chr16:22324940	15	1	13	0.866667	0.0466966
chr16:22324940-22330267	+	chr16:22324940	15	2	2	0.133333	0.00718409
chr16:23113639-23119504	-	chr16:23119504	29	1	23	0.793103	0.082617
chr16:23091266-23119504	-	chr16:23119504	29	2	5	0.172414	0.0179602
chr16:23096180-23119504	-	chr16:23119504	29	3	1	0.034483	0.00359205
chr16:23424768-23428442	-	chr16:23428442	32	1	17	0.53125	0.0610648
chr16:23403700-23428442	-	chr16:23428442	32	2	15	0.46875	0.0538807
chr16:23499926-23507099	-	chr16:23507099	6	1	5	0.833333	0.0179602
chr16:23494243-23507099	-	chr16:23507099	6	2	1	0.166667	0.00359205
chr16:23695190-23700066	+	chr16:23695190	9	1	7	0.777778	0.0251443
chr16:23695190-23695410	+	chr16:23695190	9	2	2	0.222222	0.00718409
chr16:24551932-24570998	+	chr16:24551932	26	1	20	0.769231	0.0718409
chr16:24551932-24564878	+	chr16:24551932	26	2	6	0.230769	0.0215523
chr16:24788253-24803138	+	chr16:24788253	2	1	1	0.5	0.00359205
chr16:24788253-24806040	+	chr16:24788253	2	2	1	0.5	0.00359205
chr16:2489353-2493801	+	chr16:2489353	7	1	4	0.571429	0.0143682
chr16:2489353-2495623	+	chr16:2489353	7	2	3	0.428571	0.0107761
chr16:2578452-2578560	+	chr16:2578452	3	1	2	0.666667	0.00718409
chr16:2578452-2578719	+	chr16:2578452	3	2	1	0.333333	0.00359205
chr16:2627425-2636894	+	chr16:2627425	5	1	4	0.8	0.0143682
chr16:2627425-2633586	+	chr16:2627425	5	2	1	0.2	0.00359205
chr16:27351506-27353580	+	chr16:27351506	5	1	4	0.8	0.0143682
chr16:27351506-27364017	+	chr16:27351506	5	2	1	0.2	0.00359205
chr16:27357787-27364017	+	chr16:27357787	9	1	7	0.777778	0.0251443
chr16:27357787-27367228	+	chr16:27357787	9	2	2	0.222222	0.00718409
chr1:62728763-62737261	-	chr1:62737261	6	1	5	0.833333	0.0179602
chr1:62732403-62737261	-	chr1:62737261	6	2	1	0.166667	0.00359205
chr16:2807472-2810500	+	chr16:2807472	8	1	6	0.75	0.0215523
chr16:2807472-2807946	+	chr16:2807472	8	2	1	0.125	0.00359205
chr16:2807472-2808548	+	chr16:2807472	8	3	1	0.125	0.00359205
chr16:28115866-28118998	-	chr16:28118998	11	1	9	0.818182	0.0323284
chr16:28117703-28118998	-	chr16:28118998	11	2	2	0.181818	0.00718409
chr16:28123137-28137169	-	chr16:28137169	21	1	18	0.857143	0.0646568
chr16:28124224-28137169	-	chr16:28137169	21	2	3	0.142857	0.0107761
chr16:28157414-28167848	-	chr16:28167848	29	1	18	0.62069	0.0646568
chr16:28163979-28167848	-	chr16:28167848	29	2	9	0.310345	0.0323284
chr16:28143654-28167848	-	chr16:28167848	29	3	2	0.068966	0.00718409
chr16:28399828-28403463	-	chr16:28403463	3	1	2	0.666667	0.00718409
chr16:28399378-28403463	-	chr16:28403463	3	2	1	0.333333	0.00359205
chr16:28498776-28500707	-	chr16:28500707	86	1	64	0.744186	0.229891
chr16:28499911-28500707	-	chr16:28500707	86	2	22	0.255814	0.079025
chr16:28898509-28899043	+	chr16:28898509	29	1	27	0.931034	0.0969852
chr16:28898509-28900274	+	chr16:28898509	29	2	2	0.068966	0.00718409
chr16:29916172-29917280	+	chr16:29916172	84	1	66	0.785714	0.237075
chr16:29916172-29917448	+	chr16:29916172	84	2	18	0.214286	0.0646568
chr16:30078554-30078982	+	chr16:30078554	5	1	2	0.4	0.00718409
chr16:30078554-30081350	+	chr16:30078554	5	2	2	0.4	0.00718409
chr16:30078554-30080710	+	chr16:30078554	5	3	1	0.2	0.00359205
chr16:30212045-30212614	+	chr16:30212045	3	1	2	0.666667	0.00718409
chr16:30212045-30212614	+	chr16:30212045	3	2	1	0.333333	0.00359205
chr16:30715384-30715636	+	chr16:30715384	91	1	86	0.945055	0.308916
chr16:30715384-30727800	+	chr16:30715384	91	2	5	0.054945	0.0179602
chr16:31102095-31102663	-	chr16:31102663	701	1	697	0.994294	2.50366
chr16:31098857-31102663	-	chr16:31102663	701	2	4	0.005706	0.0143682
chr1:63084376-63128801	-	chr1:63128801	6	1	4	0.666667	0.0143682
chr1:63119395-63128801	-	chr1:63128801	6	2	2	0.333333	0.00718409
chr16:3526221-3532598	+	chr16:3526221	5	1	4	0.8	0.0143682
chr16:3526221-3529600	+	chr16:3526221	5	2	1	0.2	0.00359205
chr16:3729719-3740986	-	chr16:3740986	34	1	14	0.411765	0.0502886
chr16:3725324-3740986	-	chr16:3740986	34	2	10	0.294118	0.0359205
chr16:3724339-3740986	-	chr16:3740986	34	3	6	0.176471	0.0215523
chr16:3735996-3740986	-	chr16:3740986	34	4	2	0.058824	0.00718409
chr16:3726036-3740986	-	chr16:3740986	34	5	1	0.029412	0.00359205
chr16:3739055-3740986	-	chr16:3740986	34	6	1	0.029412	0.00359205
chr16:3900297-3901010	-	chr16:3901010	103	1	99	0.961165	0.355612
chr16:3860603-3901010	-	chr16:3901010	103	2	4	0.038835	0.0143682
chr16:396147-397106	-	chr16:397106	9	1	8	0.888889	0.0287364
chr16:359972-397106	-	chr16:397106	9	2	1	0.111111	0.00359205
chr16:4029116-4039097	-	chr16:4039097	4	1	3	0.75	0.0107761
chr16:4024669-4039097	-	chr16:4039097	4	2	1	0.25	0.00359205
chr16:4311779-4312702	-	chr16:4312702	51	1	45	0.882353	0.161642
chr16:4310455-4312702	-	chr16:4312702	51	2	6	0.117647	0.0215523
chr16:4700365-4707364	+	chr16:4700365	16	1	9	0.5625	0.0323284
chr16:4700365-4702825	+	chr16:4700365	16	2	7	0.4375	0.0251443
chr16:47345150-47493086	-	chr16:47493086	4	1	2	0.5	0.00718409
chr16:47485306-47493086	-	chr16:47493086	4	2	2	0.5	0.00718409
chr16:47497792-47537001	+	chr16:47497792	3	1	1	0.333333	0.00359205
chr16:47497792-47549512	+	chr16:47497792	3	2	1	0.333333	0.00359205
chr16:47497792-47623013	+	chr16:47497792	3	3	1	0.333333	0.00359205
chr16:47531309-47549512	+	chr16:47531309	49	1	42	0.857143	0.150866
chr16:47531309-47644831	+	chr16:47531309	49	2	4	0.081633	0.0143682
chr16:47531309-47545683	+	chr16:47531309	49	3	2	0.040816	0.00718409
chr16:47531309-47630442	+	chr16:47531309	49	4	1	0.020408	0.00359205
chr16:48286041-48337216	+	chr16:48286041	13	1	8	0.615385	0.0287364
chr16:48286041-48311390	+	chr16:48286041	13	2	3	0.230769	0.0107761
chr16:48286041-48286276	+	chr16:48286041	13	3	2	0.153846	0.00718409
chr16:48381417-48382201	+	chr16:48381417	23	1	21	0.913043	0.075433
chr16:48381417-48385596	+	chr16:48381417	23	2	2	0.086957	0.00718409
chr1:65243305-65255197	+	chr1:65243305	14	1	9	0.642857	0.0323284
chr1:65243305-65280523	+	chr1:65243305	14	2	5	0.357143	0.0179602
chr16:532524-546859	+	chr16:532524	19	1	18	0.947368	0.0646568
chr16:532524-532736	+	chr16:532524	19	2	1	0.052632	0.00359205
chr16:53844051-53848760	+	chr16:53844051	5	1	3	0.6	0.0107761
chr16:53844051-53878210	+	chr16:53844051	5	2	2	0.4	0.00718409
chr16:53907697-53922863	+	chr16:53907697	26	1	19	0.730769	0.0682489
chr16:53907697-53968021	+	chr16:53907697	26	2	5	0.192308	0.0179602
chr16:53907697-53913899	+	chr16:53907697	26	3	2	0.076923	0.00718409
chr16:56900981-56902284	+	chr16:56900981	15	1	12	0.8	0.0431045
chr16:56900981-56906698	+	chr16:56900981	15	2	3	0.2	0.0107761
chr16:56906262-56906698	+	chr16:56906262	51	1	50	0.980392	0.179602
chr16:56906262-56914165	+	chr16:56906262	51	2	1	0.019608	0.00359205
chr16:56920864-56921943	+	chr16:56920864	11	1	8	0.727273	0.0287364
chr16:56920864-56936420	+	chr16:56920864	11	2	2	0.181818	0.00718409
chr16:56920864-56926966	+	chr16:56920864	11	3	1	0.090909	0.00359205
chr16:57238415-57255327	+	chr16:57238415	6	1	3	0.5	0.0107761
chr16:57238415-57238920	+	chr16:57238415	6	2	1	0.166667	0.00359205
chr16:57238415-57247010	+	chr16:57238415	6	3	1	0.166667	0.00359205
chr16:57238415-57250947	+	chr16:57238415	6	4	1	0.166667	0.00359205
chr1:65830317-65831879	+	chr1:65830317	52	1	50	0.961538	0.179602
chr1:65830317-65855310	+	chr1:65830317	52	2	2	0.038462	0.00718409
chr16:58562378-58568299	-	chr16:58568299	25	1	15	0.6	0.0538807
chr16:58564149-58568299	-	chr16:58568299	25	2	7	0.28	0.0251443
chr16:58568050-58568299	-	chr16:58568299	25	3	3	0.12	0.0107761
chr16:58594115-58594266	-	chr16:58594266	165	1	158	0.957576	0.567543
chr16:58557273-58594266	-	chr16:58594266	165	2	7	0.042424	0.0251443
chr16:58594115-58633415	-	chr16:58633415	7	1	4	0.571429	0.0143682
chr16:58610366-58633415	-	chr16:58633415	7	2	3	0.428571	0.0107761
chr16:66655964-66670484	-	chr16:66670484	36	1	20	0.555556	0.0718409
chr16:66651133-66670484	-	chr16:66670484	36	2	16	0.444444	0.0574727
chr16:66759730-66763002	-	chr16:66763002	18	1	13	0.722222	0.0466966
chr16:66761590-66763002	-	chr16:66763002	18	2	5	0.277778	0.0179602
chr16:67226663-67228883	+	chr16:67226663	6	1	4	0.666667	0.0143682
chr16:67226663-67231549	+	chr16:67226663	6	2	2	0.333333	0.00718409
chr16:68059317-68072052	+	chr16:68059317	6	1	3	0.5	0.0107761
chr16:68059317-68088520	+	chr16:68059317	6	2	3	0.5	0.0107761
chr16:68155889-68160513	+	chr16:68155889	1430	1	835	0.583916	2.99936
chr16:68155889-68157024	+	chr16:68155889	1430	2	392	0.274126	1.40808
chr16:68155889-68225678	+	chr16:68155889	1430	3	110	0.076923	0.395125
chr16:68155889-68217269	+	chr16:68155889	1430	4	49	0.034266	0.17601
chr16:68155889-68191971	+	chr16:68155889	1430	5	22	0.015385	0.079025
chr16:68155889-68248335	+	chr16:68155889	1430	6	10	0.006993	0.0359205
chr16:68155889-68208417	+	chr16:68155889	1430	7	8	0.005594	0.0287364
chr16:68155889-68200918	+	chr16:68155889	1430	8	4	0.002797	0.0143682
chr16:68300495-68309152	+	chr16:68300495	236	1	187	0.792373	0.671712
chr16:68300495-68300624	+	chr16:68300495	236	2	29	0.122881	0.104169
chr16:68300495-68325564	+	chr16:68300495	236	3	12	0.050847	0.0431045
chr16:68300495-68331379	+	chr16:68300495	236	4	6	0.025424	0.0215523
chr16:68300495-68328704	+	chr16:68300495	236	5	2	0.008475	0.00718409
chr16:68308593-68309152	+	chr16:68308593	60	1	37	0.616667	0.132906
chr16:68308593-68321774	+	chr16:68308593	60	2	23	0.383333	0.082617
chr16:69189773-69201088	+	chr16:69189773	13	1	5	0.384615	0.0179602
chr16:69189773-69197081	+	chr16:69189773	13	2	4	0.307692	0.0143682
chr16:69189773-69199429	+	chr16:69189773	13	3	4	0.307692	0.0143682
chr16:69269650-69279718	+	chr16:69269650	4	1	3	0.75	0.0107761
chr16:69269650-69294163	+	chr16:69269650	4	2	1	0.25	0.00359205
chr16:69293952-69294163	+	chr16:69293952	10	1	5	0.5	0.0179602
chr16:69293952-69318147	+	chr16:69293952	10	2	5	0.5	0.0179602
chr16:69680419-69711238	+	chr16:69680419	9	1	5	0.555556	0.0179602
chr16:69680419-69693802	+	chr16:69680419	9	2	3	0.333333	0.0107761
chr16:69680419-69718873	+	chr16:69680419	9	3	1	0.111111	0.00359205
chr16:69874028-69876023	+	chr16:69874028	10	1	8	0.8	0.0287364
chr16:69874028-69905834	+	chr16:69874028	10	2	2	0.2	0.00718409
chr16:70057281-70065871	-	chr16:70065871	11	1	9	0.818182	0.0323284
chr16:70051949-70065871	-	chr16:70065871	11	2	1	0.090909	0.00359205
chr16:70055726-70065871	-	chr16:70065871	11	3	1	0.090909	0.00359205
chr16:70154363-70154622	+	chr16:70154363	4	1	3	0.75	0.0107761
chr16:70154363-70178436	+	chr16:70154363	4	2	1	0.25	0.00359205
chr16:70180036-70182456	+	chr16:70180036	2	1	1	0.5	0.00359205
chr16:70180036-70187476	+	chr16:70180036	2	2	1	0.5	0.00359205
chr16:70292882-70296427	-	chr16:70296427	28	1	17	0.607143	0.0610648
chr16:70294946-70296427	-	chr16:70296427	28	2	11	0.392857	0.0395125
chr16:70294946-70302282	-	chr16:70302282	12	1	10	0.833333	0.0359205
chr16:70292882-70302282	-	chr16:70302282	12	2	2	0.166667	0.00718409
chr16:70348804-70350007	+	chr16:70348804	5	1	3	0.6	0.0107761
chr16:70348804-70351491	+	chr16:70348804	5	2	2	0.4	0.00718409
chr16:70502751-70503226	+	chr16:70502751	18	1	8	0.444444	0.0287364
chr16:70502751-70505255	+	chr16:70502751	18	2	8	0.444444	0.0287364
chr16:70502751-70509670	+	chr16:70502751	18	3	2	0.111111	0.00718409
chr16:70548237-70553634	-	chr16:70553634	6	1	4	0.666667	0.0143682
chr16:70534860-70553634	-	chr16:70553634	6	2	2	0.333333	0.00718409
chr16:70560489-70564820	+	chr16:70560489	13	1	6	0.461538	0.0215523
chr16:70560489-70566523	+	chr16:70560489	13	2	6	0.461538	0.0215523
chr16:70560489-70589109	+	chr16:70560489	13	3	1	0.076923	0.00359205
chr16:70566381-70575737	+	chr16:70566381	7	1	4	0.571429	0.0143682
chr16:70566381-70578436	+	chr16:70566381	7	2	3	0.428571	0.0107761
chr16:70594371-70597953	+	chr16:70594371	28	1	24	0.857143	0.0862091
chr16:70594371-70595687	+	chr16:70594371	28	2	4	0.142857	0.0143682
chr16:70601313-70604052	+	chr16:70601313	15	1	11	0.733333	0.0395125
chr16:70601313-70603044	+	chr16:70601313	15	2	4	0.266667	0.0143682
chr16:71701080-71706225	-	chr16:71706225	10	1	9	0.9	0.0323284
chr16:71703177-71706225	-	chr16:71706225	10	2	1	0.1	0.00359205
chr16:71701080-71715808	-	chr16:71715808	10	1	9	0.9	0.0323284
chr16:71703177-71715808	-	chr16:71715808	10	2	1	0.1	0.00359205
chr16:72984367-72994093	-	chr16:72994093	157	1	125	0.796178	0.449006
chr16:72991325-72994093	-	chr16:72994093	157	2	18	0.11465	0.0646568
chr16:72923629-72994093	-	chr16:72994093	157	3	13	0.082803	0.0466966
chr16:72845475-72994093	-	chr16:72994093	157	4	1	0.006369	0.00359205
chr16:74366464-74371521	-	chr16:74371521	7	1	5	0.714286	0.0179602
chr16:74368789-74371521	-	chr16:74371521	7	2	2	0.285714	0.00718409
[truncated: 3,464 more rows]

## Sheet: HeLa_S3_A3BS
Chrom:Start-End	Strand	Common 5' back-splice site	Total junction reads of common 5' back-splice site	Index of alternative 3' back-splice site	Junction reads of this alternative 3' back-splice site	PCU (alternative 3' back-splice site)	RPM (junction reads of circRNA)
[truncated: 4,668 more rows]

[truncated: 27 more sheets: SK_N_SH_RA_A5BS, SK_N_SH_RA_A3BS, K562_A5BS, K562_A3BS, HepG2_A5BS, HepG2_A3BS, BJ_A5BS, BJ_A3BS, GM12878_A5BS, GM12878_A3BS, NHEK_A5BS, NHEK_A3BS, H1_A5BS, H1_A3BS, AG04450_A5BS, AG04450_A3BS, HUVEC_A5BS, HUVEC_A3BS, H9_p(A)−_A5BS, H9_p(A)−_A3BS …]
