# Supplementary material for: Diverse alternative back-splicing and alternative splicing landscape of circular RNAs
Source: Genome Res. 2016 Sep;26(9):1277–87. doi: 10.1101/gr.202895.115 (PMC5052039; doi:10.1101/gr.202895.115)
Supplement: Supplemental Material [file supp_gr.202895.115_Supplemental_Table_S3.xlsx]

## Sheet: Table Legend
Supplemental Table S3. List of novel exons with detected back-splicing junctions.
Novel exons were detected with back-splicing junctions from the examined 13 cell lines, listed with their genomic location, supported back-splice junction read number and annotation information of their left/right back-splice site.

## Sheet: A549
Chrom	Start	End	Junction Reads	Left back-splice site	Right back-splice site
chr1	1718373	1770677	2	None	Annotated
chr1	1735857	1811341	6	Annotated	None
chr1	8037711	8045195	3	Annotated	None
chr1	22404921	22417994	1	Annotated	None
chr1	32697344	32697785	1	None	Annotated
chr1	64489069	64516388	5	None	Annotated
chr1	66729232	66731770	1	None	Annotated
chr1	77672324	77678032	2	Annotated	None
chr1	90309167	90312217	2	None	Annotated
chr1	186283099	186303665	4	None	Annotated
chr1	225332223	225340585	1	None	Annotated
chr1	232649602	232669329	4	Annotated	None
chr1	232669235	232709968	1	None	None
chr1	233372001	233372726	37	None	Annotated
chr10	4872866	4889852	35	Annotated	None
chr10	4872866	4915499	17	Annotated	None
chr10	4872866	4932115	25	Annotated	None
chr10	4932063	4950612	7	None	Annotated
chr10	7239509	7325921	2	Annotated	None
chr10	11639629	11643466	1	Annotated	None
chr10	21234266	21250708	3	None	Annotated
chr10	21776873	21777027	2	None	None
chr10	27053438	27054247	1	None	Annotated
chr10	31644075	31647262	2	Annotated	None
chr10	32337391	32339451	4	Annotated	None
chr10	47121120	47122996	1	None	None
chr10	47134115	47139994	6	None	None
chr10	60374052	60380661	8	None	Annotated
chr10	71912018	71920825	5	None	Annotated
chr10	71912018	71921687	14	None	Annotated
chr10	80870194	80976031	1	None	Annotated
chr10	100154728	100160014	6	None	Annotated
chr10	126628942	126631876	5	None	Annotated
chr10	126631025	126650977	31	Annotated	None
chr10	127555558	127574245	3	Annotated	None
chr11	497266	497554	1	None	None
chr11	8673346	8701610	5	Annotated	None
chr11	8693443	8696430	7	None	Annotated
chr11	28250417	28252532	7	None	None
chr11	28250417	28318478	4	None	Annotated
chr11	28373636	28383583	2	None	Annotated
chr11	31474264	31484852	6	None	Annotated
chr11	35226058	35231728	2	Annotated	None
chr11	47237886	47260472	3	Annotated	None
chr11	61133589	61135470	5	None	Annotated
chr11	65204008	65205128	2	None	None
chr11	65270107	65272066	1	Annotated	None
chr11	68229094	68321725	3	None	Annotated
chr11	130331324	130332675	2	None	Annotated
chr12	11180999	11199787	9	None	Annotated
chr12	11273608	11276922	1	Annotated	None
chr12	21168572	21176221	1	None	Annotated
chr12	27521194	27530497	4	Annotated	None
chr12	47497895	47501947	40	Annotated	None
chr12	47606379	47610472	4	None	Annotated
chr12	53848533	53865591	1	None	Annotated
chr12	56998856	57015057	2	Annotated	None
chr12	69652778	69656342	1	None	Annotated
chr12	74678804	74734036	3	Annotated	None
chr12	102660964	102663424	2	None	None
chr12	107443548	107445477	2	Annotated	None
chr12	109212024	109212334	20	Annotated	None
chr12	110815197	110815648	1	Annotated	None
chr12	116668337	116675510	99	None	Annotated
chr12	116674625	116675510	35	None	Annotated
chr13	21976935	22028709	2	Annotated	None
chr13	114170357	114175048	12	None	Annotated
chr14	20811240	20811345	28	None	None
chr14	58757416	58758425	1	None	Annotated
chr14	59925574	59932445	1	Annotated	None
chr14	76488669	76498447	3	Annotated	None
chr14	101434984	101455127	5	Annotated	None
chr14	101435795	101455127	9	Annotated	None
chr15	22940727	22941163	6	Annotated	None
chr15	25650607	25660989	10	Annotated	None
chr15	30948206	30951047	3	None	Annotated
chr15	30950968	31042759	1	None	Annotated
chr15	56434975	56535485	9	Annotated	None
chr15	59548482	59552132	2	Annotated	None
chr15	59548482	59563433	2	Annotated	None
chr15	67838516	67855688	1	None	Annotated
chr15	69629679	69643353	2	Annotated	None
chr15	69754350	69754654	4	None	None
chr15	70949302	70952555	8	None	Annotated
chr15	71518779	71519992	6	None	None
chr15	71640646	71704162	1	None	Annotated
chr15	77339117	77348597	17	None	Annotated
chr16	3860603	3863025	1	Annotated	None
chr16	19656156	19663412	3	None	Annotated
chr16	21350241	21363459	56	None	Annotated
chr16	21358475	21363459	4	None	Annotated
chr16	53175090	53191453	19	None	Annotated
chr16	58741982	58743471	2	None	Annotated
chr16	58743320	58751564	2	Annotated	None
chr16	74955693	74976724	1	None	Annotated
chr16	75425295	75429107	5	None	Annotated
chr16	89484691	89493477	6	Annotated	None
chr16	89607351	89611180	1	None	Annotated
chr17	169210	177619	1	Annotated	None
chr17	4192524	4200104	2	Annotated	None
chr17	11972976	11984847	1	None	Annotated
chr17	15518958	15531179	1	Annotated	None
chr17	18635351	18639585	1	Annotated	None
chr17	33348389	33390869	6	Annotated	None
chr17	33998878	34001340	1	None	Annotated
chr17	38638348	38638668	28	None	Annotated
chr17	40048531	40063822	1	Annotated	None
chr17	46729750	46730336	4	None	None
chr17	54926056	54934026	2	Annotated	None
chr17	57181364	57181755	1	None	Annotated
chr17	64125863	64163690	1	Annotated	None
chr17	64163618	64179425	2	None	Annotated
chr17	78704359	78705925	5	Annotated	None
chr17	79477702	79477859	2	None	Annotated
chr18	45415391	45423180	13	None	Annotated
chr18	51797729	51804223	1	Annotated	None
chr18	74561577	74563895	1	None	Annotated
chr19	6230605	6270770	2	None	Annotated
chr19	35496588	35512942	1	None	Annotated
chr19	39195573	39196989	1	Annotated	None
chr19	47421744	47425613	24	None	Annotated
chr19	47421744	47440665	20	None	Annotated
chr19	48982379	48985920	1	Annotated	None
chr19	58290118	58291514	2	Annotated	None
chr19	58350390	58352276	1	Annotated	None
chr2	25754341	25781276	3	Annotated	None
chr2	26587169	26597957	8	Annotated	None
chr2	26587174	26590088	1	None	Annotated
chr2	26997118	26998657	1	Annotated	None
chr2	26997118	27001028	2	Annotated	None
chr2	31187713	31189168	2	None	Annotated
chr2	32654213	32679022	4	Annotated	None
chr2	36586046	36623930	4	None	Annotated
chr2	36586046	36669878	20	None	Annotated
chr2	36596250	36623930	19	None	Annotated
chr2	36596250	36669878	20	None	Annotated
chr2	36596250	36691798	12	None	Annotated
chr2	36615114	36623930	28	None	Annotated
chr2	36615114	36669878	32	None	Annotated
chr2	36615114	36691798	12	None	Annotated
chr2	36615114	36706837	4	None	Annotated
chr2	36615114	36749456	2	None	Annotated
chr2	45925079	45927784	3	None	Annotated
chr2	45925079	45928630	6	None	Annotated
chr2	114386126	114390637	1	Annotated	None
chr2	148811501	148812018	6	None	Annotated
chr2	159444736	159445499	1	Annotated	None
chr2	183998293	184047408	5	Annotated	None
chr2	184016235	184025923	4	Annotated	None
chr2	184022171	184047408	2	Annotated	None
chr2	216177220	216214412	11	Annotated	None
chr2	216209501	216224190	1	Annotated	None
chr2	220074552	220082529	2	None	Annotated
chr2	234438076	234451190	1	Annotated	None
chr2	242629252	242630068	1	None	Annotated
chr20	464571	489304	1	None	Annotated
chr20	6090944	6100386	1	Annotated	None
chr20	17953349	17968941	2	None	Annotated
chr20	34697654	34700402	2	None	Annotated
chr20	44979399	44980824	1	Annotated	None
chr20	48256214	48257102	1	Annotated	None
chr20	49518553	49535318	1	Annotated	None
chr21	9827003	9827089	1	None	None
chr21	9827003	9827142	2	None	None
chr21	9827003	9827390	7	None	None
chr21	16363521	16415895	4	None	Annotated
chr21	16386664	16387546	6	Annotated	None
chr21	16412683	16415895	15	None	Annotated
chr21	34065481	34067592	1	None	Annotated
chr21	38792600	38798083	17	Annotated	None
chr22	28911614	28915308	6	None	None
chr22	40982036	40990739	8	None	Annotated
chr22	46493805	46505788	2	Annotated	None
chr3	5233954	5236966	1	None	Annotated
chr3	9477751	9478572	5	None	Annotated
chr3	44144827	44145619	4	None	None
chr3	44144827	44145627	2	None	None
chr3	47045775	47046080	3	None	Annotated
chr3	51575513	51624575	43	None	Annotated
chr3	51575604	51624575	9	None	Annotated
chr3	57632042	57665452	2	Annotated	None
chr3	57643406	57665452	5	Annotated	None
chr3	57646486	57665452	4	Annotated	None
chr3	57665213	57665452	1	None	None
chr3	61608136	61608814	4	None	None
chr3	67718636	67720333	1	None	Annotated
chr3	96336753	96336839	1	None	None
chr3	98600383	98611450	6	Annotated	None
chr3	122842182	122843190	2	None	Annotated
chr3	129599151	129599405	1	Annotated	None
chr3	151513526	151521713	2	None	Annotated
chr3	184588531	184612713	1	None	Annotated
chr3	188208209	188242575	2	None	Annotated
chr3	195686053	195686957	11	None	Annotated
chr4	103225473	103236899	6	Annotated	None
chr4	139135738	139163215	8	Annotated	None
chr4	139162946	139163215	4	Annotated	None
chr5	5453228	5476192	1	None	Annotated
chr5	79974745	80015354	6	Annotated	None
chr5	134509731	134589702	2	Annotated	None
chr5	145083537	145144563	3	None	Annotated
chr5	154297490	154305537	1	Annotated	None
chr5	156408929	156429918	1	None	None
chr5	170610202	170632616	28	None	Annotated
chr5	179224664	179228969	5	None	Annotated
chr6	64088930	64114506	4	None	None
chr6	64089200	64092461	10	None	None
chr6	74432011	74446231	1	None	Annotated
chr6	76331642	76332574	2	None	Annotated
chr6	111093409	111095140	2	None	Annotated
chr6	134089968	134090065	7	Annotated	None
chr7	7841300	7917126	2	Annotated	None
chr7	32762334	32766082	2	None	Annotated
chr7	37988441	37989994	19	Annotated	None
chr7	43400484	43404825	20	Annotated	None
chr7	47474879	47549527	2	Annotated	None
chr7	47512816	47546542	3	None	Annotated
chr7	47512816	47568745	4	None	Annotated
chr7	47536311	47568745	3	None	Annotated
chr7	65892935	65904291	6	Annotated	None
chr7	65943995	65955094	1	Annotated	None
chr7	72361165	72371665	1	Annotated	None
chr7	75706423	75721484	4	None	Annotated
chr7	93491826	93492029	8	None	None
chr7	107824684	107825130	4	Annotated	None
chr7	128287976	128289036	1	None	Annotated
chr7	128655032	128660049	1	Annotated	None
chr7	129283562	129297414	1	None	Annotated
chr7	129283562	129330386	1	None	Annotated
chr7_gl000195_random	142142	152034	2	None	None
chr8	8581039	8582549	2	None	None
chr8	17601112	17653062	3	Annotated	None
chr8	18622958	18797803	2	Annotated	None
chr8	18793543	18797803	4	Annotated	None
chr8	19423657	19459376	11	None	Annotated
chr8	19442676	19541673	3	Annotated	None
chr8	19457280	19459376	12	None	Annotated
chr8	19459281	19541673	7	Annotated	None
chr8	19540438	19541673	10	Annotated	None
chr8	19540438	19545854	4	Annotated	None
chr8	19540438	19610737	2	Annotated	None
chr8	19562271	19563538	2	None	None
chr8	22478731	22488091	2	None	Annotated
chr8	25099710	25101273	90	None	Annotated
chr8	25101189	25105531	2	Annotated	None
chr8	25157834	25158173	1	None	Annotated
chr8	25157834	25191712	1	None	Annotated
chr8	62550518	62559437	1	None	Annotated
chr8	72964773	72974600	2	Annotated	None
chr8	101271334	101282241	10	None	Annotated
chr8	101271334	101287389	28	None	Annotated
chr8	101271334	101300495	19	None	Annotated
chr8	131226801	131415139	4	Annotated	None
chr8	131370262	131374034	9	Annotated	None
chr8	131370262	131415139	25	Annotated	None
chr8	141595189	141595410	1	None	Annotated
chr8	142160932	142166088	3	Annotated	None
chr8	142161717	142166088	5	Annotated	None
chr8	142195275	142209325	3	None	None
chr9	4286037	4286435	24	Annotated	None
chr9	33932559	33933644	27	Annotated	None
chr9	37126308	37127260	7	Annotated	None
chr9	43815886	43828221	1	None	Annotated
chr9	43884944	43890496	1	Annotated	None
chr9	103054656	103055325	2	None	Annotated
chr9	112172278	112172612	4	Annotated	None
chr9	113703700	113771481	1	Annotated	None
chr9	113771427	113773970	1	None	Annotated
chr9	126531792	126532247	3	Annotated	None
chr9	129179195	129184227	14	None	Annotated
chr9	131597601	131609135	3	Annotated	None
chr9	134312006	134312282	3	Annotated	None
chrX	3785674	3821610	1	None	None
chrX	21886584	21900769	6	Annotated	None
chrX	53674310	53675562	1	Annotated	None
chrX	102081896	102160665	2	Annotated	None
chrX	102094728	102160665	11	Annotated	None
chrX	102152501	102160665	16	Annotated	None
chrX	151127462	151138874	2	None	Annotated
chrX	151804335	151808254	2	None	None
chrX	151804335	151809756	4	None	None
chrX	152966232	152966320	6	None	None
chrX	154645235	154649223	29	None	None
chrY	14813938	14821476	1	None	Annotated

## Sheet: HeLa_S3
Chrom	Start	End	Junction Reads	Left back-splice site	Right back-splice site
chr1	1322614	1326245	46	None	Annotated
chr1	1606901	1669248	6	Annotated	None
chr1	1693015	1693474	1	None	Annotated
chr1	2324708	2332374	2	None	Annotated
chr1	3656796	3662750	47	Annotated	None
chr1	9833329	9869465	2	Annotated	None
chr1	10093686	10165802	2	None	Annotated
chr1	16119331	16123438	14	None	None
chr1	48260257	48261352	3	Annotated	None
chr1	51171457	51246716	6	Annotated	None
chr1	53326402	53358647	1	Annotated	None
chr1	73214848	73232370	15	Annotated	None
chr1	90470691	90473064	1	Annotated	None
chr1	101362125	101372225	3	Annotated	None
chr1	144048708	144053668	2	None	Annotated
chr1	153909017	153913870	5	Annotated	None
chr1	155348071	155410384	1	Annotated	None
chr1	168200751	168212307	3	Annotated	None
chr1	169445652	169446995	6	None	Annotated
chr1	173429516	173430499	1	Annotated	None
chr1	204416563	204430084	1	Annotated	None
chr1	225273411	225284941	1	None	Annotated
chr1	233344263	233398868	1	Annotated	None
chr1	233372590	233398868	1	Annotated	None
chr10	5935939	5948595	6	None	Annotated
chr10	7405839	7423911	2	None	Annotated
chr10	69714351	69773911	1	Annotated	None
chr10	69869205	69882097	3	None	Annotated
chr10	89624210	89653866	13	None	Annotated
chr10	89624210	89685314	3	None	Annotated
chr10	89624210	89693008	4	None	Annotated
chr10	89624210	89712016	2	None	Annotated
chr10	101542585	101544538	1	None	Annotated
chr10	104896005	104899236	3	None	Annotated
chr10	125798030	125804397	1	Annotated	None
chr10	126628942	126631876	6	None	Annotated
chr10	126631025	126650977	31	Annotated	None
chr11	6629830	6629955	1	None	Annotated
chr11	6629830	6632683	6	None	Annotated
chr11	28250417	28252532	13	None	None
chr11	28373636	28383583	4	None	Annotated
chr11	28383483	28506029	2	Annotated	None
chr11	46958117	47008861	12	None	Annotated
chr11	46958117	47074069	38	None	Annotated
chr11	46958117	47159280	8	None	Annotated
chr11	46958117	47182741	1	None	Annotated
chr11	61039166	61044152	4	None	Annotated
chr11	62649352	62655690	1	None	Annotated
chr11	64088132	64089346	1	Annotated	None
chr11	65202523	65205128	41	None	None
chr11	65202537	65205128	7	None	None
chr11	65204008	65205128	14	None	None
chr11	65269791	65271829	2	None	None
chr11	65271199	65271402	1	None	None
chr11	70935742	70951968	9	Annotated	None
chr11	85374222	85374645	2	None	Annotated
chr11	86778735	86786828	7	Annotated	None
chr11	86778735	86807998	3	Annotated	None
chr11	86802403	86807998	4	Annotated	None
chr12	938227	971436	2	None	Annotated
chr12	995125	1006847	4	None	Annotated
chr12	20546828	20556049	2	None	None
chr12	20546828	20556968	9	None	None
chr12	40412647	40442012	8	None	Annotated
chr12	49332817	49334971	7	None	Annotated
chr12	53848533	53865591	2	None	Annotated
chr12	110527178	110527451	3	None	None
chr12	111916873	111924628	11	None	Annotated
chr12	116674625	116675510	15	None	Annotated
chr12	117442353	117448255	15	None	Annotated
chr12	121840544	121841447	1	Annotated	None
chr12	133147653	133158852	1	None	Annotated
chr13	21364600	21430141	10	Annotated	None
chr13	28840854	28845003	8	None	Annotated
chr13	49636921	49649500	1	None	Annotated
chr13	111173096	111173365	1	None	None
chr13	114149816	114165509	1	Annotated	None
chr13	114170357	114175048	16	None	Annotated
chr14	20811243	20811345	7	None	None
chr14	35438375	35441270	9	Annotated	None
chr14	39939521	39939604	6	None	None
chr14	70442431	70467460	1	Annotated	None
chr14	71455286	71476441	5	None	Annotated
chr14	75573168	75590926	5	None	Annotated
chr15	30950968	31042759	1	None	Annotated
chr15	44892664	44949461	6	Annotated	None
chr15	44898222	44900695	3	Annotated	None
chr15	44898222	44949461	2	Annotated	None
chr15	44900641	44949461	2	Annotated	None
chr15	44905627	44949461	9	Annotated	None
chr15	44907560	44949461	3	Annotated	None
chr15	44918528	44949461	2	Annotated	None
chr15	44941063	44949461	3	Annotated	None
chr15	56434975	56535485	15	Annotated	None
chr15	72511284	72523525	3	Annotated	None
chr15	78316497	78327081	2	Annotated	None
chr16	1551680	1556330	1	None	Annotated
chr16	2105980	2108874	14	None	Annotated
chr16	2666600	2672766	2	None	Annotated
chr16	2666600	2683837	1	None	Annotated
chr16	2683739	2692490	4	Annotated	None
chr16	11114049	11146581	1	Annotated	None
chr16	16235029	16236799	1	Annotated	None
chr16	16387508	16388625	1	Annotated	None
chr16	18511224	18512341	2	None	Annotated
chr16	18584198	18585024	1	Annotated	None
chr16	31102095	31102663	697	None	Annotated
chr16	56903067	56904648	1	None	Annotated
chr16	66973129	66977274	4	None	Annotated
chr16	69681417	69689702	4	None	Annotated
chr16	89427902	89484776	2	None	Annotated
chr16	89484691	89493477	23	Annotated	None
chr16	89493174	89497734	4	None	Annotated
chr16	89607351	89607754	2	None	None
chr16	89804650	89833645	1	None	Annotated
chr17	1673009	1675369	4	None	Annotated
chr17	3553457	3568092	1	None	Annotated
chr17	18814415	18821700	3	Annotated	None
chr17	18821602	18832270	4	None	Annotated
chr17	26449628	26459835	2	Annotated	None
chr17	30678757	30704999	4	Annotated	None
chr17	41197678	41219712	3	None	Annotated
chr17	43101740	43112367	6	None	Annotated
chr17	45043899	45046291	3	Annotated	None
chr17	53344136	53345447	4	None	Annotated
chr17	53478829	53481908	1	Annotated	None
chr17	66303083	66353149	2	Annotated	None
chr17	66337415	66339932	1	None	Annotated
chr17	76109085	76122729	1	None	Annotated
chr17	77752182	77758115	3	Annotated	None
chr17	80350256	80364358	3	None	Annotated
chr17	80714040	80741590	9	Annotated	None
chr17	80739464	80741590	35	Annotated	None
chr17_ctg5_hap1	1345291	1346669	34	Annotated	None
chr18	3214931	3219876	1	Annotated	None
chr18	7037021	7037750	4	None	Annotated
chr18	13048857	13135840	3	Annotated	None
chr18	33775219	33783229	2	Annotated	None
chr18	44398240	44401035	2	None	Annotated
chr18	45391429	45400326	1	Annotated	None
chr18	45415391	45423180	16	None	Annotated
chr18	59737622	59763183	10	None	Annotated
chr18	60948119	60948447	8	None	None
chr19	1090906	1091904	3	Annotated	None
chr19	3515893	3517787	7	None	None
chr19	3515893	3551192	1	None	Annotated
chr19	3520856	3524033	6	None	None
chr19	3523858	3538754	1	None	Annotated
chr19	3523858	3551192	5	None	Annotated
chr19	3538538	3538754	2	None	Annotated
chr19	3538538	3551192	32	None	Annotated
chr19	3538675	3551192	4	None	Annotated
chr19	9038076	9043190	2	Annotated	None
chr19	9043124	9043461	1	None	Annotated
chr19	13039155	13039746	6	Annotated	None
chr19	15382132	15383944	12	None	Annotated
chr19	35749847	35750724	14	Annotated	None
chr19	47421744	47425613	4	None	Annotated
chr19	47421744	47440665	12	None	Annotated
chr19	47421744	47492932	11	None	Annotated
chr19	57329967	57369708	1	Annotated	None
chr2	271865	277372	1	Annotated	None
chr2	20490412	20497424	1	Annotated	None
chr2	29169315	29170027	1	Annotated	None
chr2	32660521	32670736	7	None	Annotated
chr2	32716548	32718734	1	None	Annotated
chr2	36596250	36623930	4	None	Annotated
chr2	36615114	36623930	38	None	Annotated
chr2	36615114	36669878	30	None	Annotated
chr2	36615114	36691798	6	None	Annotated
chr2	36658251	36669878	1	None	Annotated
chr2	37227728	37232871	6	Annotated	None
chr2	64160806	64208824	1	Annotated	None
chr2	71215664	71220905	11	None	Annotated
chr2	78166956	78178659	8	None	None
chr2	103400352	103414459	6	None	Annotated
chr2	112101637	112252543	2	Annotated	None
chr2	114386130	114390637	2	Annotated	None
chr2	128146456	128146761	5	None	Annotated
chr2	132442281	132445876	1	None	Annotated
chr2	184016235	184025923	4	Annotated	None
chr2	184016235	184047408	21	Annotated	None
chr2	184022171	184025923	1	Annotated	None
chr2	207025605	207025856	12	None	Annotated
chr2	236877105	236877601	2	Annotated	None
chr20	32617574	32619410	237	None	Annotated
chr20	32617574	32666359	2	None	Annotated
chr20	33059248	33095713	1	Annotated	None
chr20	33065576	33095713	1	Annotated	None
chr20	54978523	54978854	1	Annotated	None
chr20	62303908	62305404	3	Annotated	None
chr20	62557894	62562375	6	None	Annotated
chr20	62575749	62577341	2	Annotated	None
chr21	16386664	16387546	7	Annotated	None
chr21	30677524	30702014	4	None	Annotated
chr21	34922525	34923595	4	None	Annotated
chr21	38792600	38888974	3	Annotated	None
chr21	44949637	44949842	2	None	Annotated
chr21	46548316	46564616	5	Annotated	None
chr21	46558212	46564616	4	None	None
chr21	46591524	46627303	2	Annotated	None
chr21	47722398	47742681	8	Annotated	None
chr22	20383650	20397985	1	None	Annotated
chr22	34157357	34161940	5	Annotated	None
chr22	40982036	40990739	11	None	Annotated
chr22	42280845	42282655	2	Annotated	None
chr22	46493805	46505788	29	Annotated	None
chr3	4403722	4403938	21	None	Annotated
chr3	8794569	8810277	5	None	Annotated
chr3	9477751	9478572	17	None	Annotated
chr3	9792628	9793641	10	Annotated	None
chr3	49372452	49373029	1	None	Annotated
chr3	50214200	50214761	1	Annotated	None
chr3	51464822	51526504	1	Annotated	None
chr3	51517734	51526504	3	Annotated	None
chr3	51575513	51624575	37	None	Annotated
chr3	51575513	51661770	1	None	Annotated
chr3	51575513	51664947	3	None	Annotated
chr3	51575604	51624575	23	None	Annotated
chr3	51575604	51661770	3	None	Annotated
chr3	53901734	53910107	1	None	Annotated
chr3	100002450	100009559	3	Annotated	None
chr3	110830876	110853326	1	Annotated	None
chr3	133876964	133914026	25	None	Annotated
chr3	176816253	176825896	40	Annotated	None
chr3	176816253	176828675	4	Annotated	None
chr4	13338516	13383218	3	None	Annotated
chr4	48523064	48549671	1	Annotated	None
chr4	54306748	54308364	7	Annotated	None
chr4	103180611	103236896	2	Annotated	None
chr4	103188646	103236899	1	Annotated	None
chr4	103225473	103236899	33	Annotated	None
chr4	103225473	103246155	6	Annotated	None
chr4	110132708	110134841	25	None	None
chr5	843714	860798	1	Annotated	None
chr5	14673750	14693203	13	Annotated	None
chr5	14690147	14693203	9	Annotated	None
chr5	32270950	32274228	2	None	Annotated
chr5	58334685	58338242	9	Annotated	None
chr5	77927353	77928191	3	None	Annotated
chr5	80419411	80422982	3	None	Annotated
chr5	92923891	92929455	43	None	None
chr5	109051860	109125228	1	None	Annotated
chr5	145044816	145050379	3	None	None
chr5	177635736	177651730	3	None	Annotated
chr5	177635736	177658524	1	None	Annotated
chr6	1099947	1101761	25	Annotated	None
chr6	17869276	17873668	2	None	Annotated
chr6	34614377	34617607	1	Annotated	None
chr6	53133884	53156761	2	None	Annotated
chr6	64089200	64114506	1	None	None
chr6	76331642	76332574	6	None	Annotated
chr6	82767655	82769396	27	None	None
chr6	88224145	88229425	5	None	Annotated
chr6	99347143	99374462	2	Annotated	None
chr6	105398335	105406161	1	None	Annotated
chr6	126314902	126361991	1	Annotated	None
chr6	126434011	126437001	5	None	None
chr6	133562765	133703579	1	None	Annotated
chr6	157405795	157406212	8	Annotated	None
chr6	160813442	160831878	3	None	Annotated
chr6	166324295	166363110	7	Annotated	None
chr6	170033042	170063802	1	Annotated	None
chr7	6054780	6057676	1	None	Annotated
chr7	44025790	44026276	11	None	Annotated
chr7	65191743	65197022	1	Annotated	None
chr7	65191743	65199318	1	Annotated	None
chr7	66018975	66019824	2	None	Annotated
chr7	66019571	66041916	1	Annotated	None
chr7	66038371	66041916	2	Annotated	None
chr7	75721380	75729274	12	None	Annotated
chr7	75721380	75730732	3	None	None
chr7	75728757	75730732	7	Annotated	None
chr7	132989920	133041327	2	None	Annotated
chr7	133981019	133986862	5	None	Annotated
chr7	138579087	138601787	4	Annotated	None
chr7	138583700	138601787	2	Annotated	None
chr8	19459281	19610737	6	Annotated	None
chr8	22845004	22852152	8	None	Annotated
chr8	22880209	22900756	6	None	Annotated
chr8	22899553	22900756	31	None	Annotated
chr8	27515954	27517056	2	None	Annotated
chr8	30539446	30553973	1	Annotated	None
chr8	38162104	38205661	3	Annotated	None
chr8	42719759	42720632	21	None	Annotated
chr8	42719759	42725255	15	None	Annotated
chr8	128043989	128161917	1	None	None
chr8	128129121	128161917	10	None	None
chr8	128129121	128186609	51	None	None
chr8	128152521	128156164	1	None	None
chr8	128152521	128186609	4	None	None
chr8	128152521	128215465	1	None	None
chr8	128152988	128161917	11	None	None
chr8	128152988	128174329	10	None	None
chr8	128152988	128181362	1	None	None
chr8	128152988	128186609	34	None	None
chr8	128152988	128200360	1	None	Annotated
chr8	128161860	128174329	2	None	None
chr8	128174166	128186609	47	None	None
chr8	128174166	128200129	6	None	Annotated
chr8	128174166	128200360	3	None	Annotated
chr8	128174166	128231211	7	None	None
chr8	128186434	128186609	8	None	None
chr8	128186434	128200360	8	None	Annotated
chr8	128186434	128215465	2	None	None
chr8	128186434	128231211	2	None	None
chr8	128191885	128200129	2	None	Annotated
chr8	128200029	128214397	4	Annotated	None
chr8	128200029	128215465	1	Annotated	None
chr8	128200029	128231211	2	Annotated	None
chr8	128200289	128202227	2	Annotated	None
chr8	128209719	128214397	2	None	None
chr8	128214286	128236929	1	None	None
chr8	128231054	128231164	483	Annotated	None
chr8	128231054	128231211	11624	Annotated	None
chr8	128231054	128231389	17	Annotated	None
chr8	128231054	128232650	99	Annotated	None
chr8	128231054	128235889	67	Annotated	None
chr8	128231054	128235911	122	Annotated	None
chr8	128231054	128236720	127	Annotated	None
chr8	128231054	128236929	193	Annotated	None
chr8	128231059	128231164	13	None	None
chr8	128231059	128231211	344	None	None
chr8	128231059	128235889	1	None	None
chr8	128231059	128236929	28	None	None
chr8	141407718	141419716	1	Annotated	None
chr8	141582910	141616013	6	Annotated	None
chr8	141591003	141595410	6	None	Annotated
chr8	141595217	141616013	41	Annotated	None
chr9	4722152	4722625	3	None	Annotated
chr9	5665677	5666072	1	None	None
chr9	33932559	33933644	18	Annotated	None
chr9	37126308	37127260	4	Annotated	None
chr9	127480061	127495628	8	None	Annotated
chr9	131512900	131517938	6	None	Annotated
chr9	134305480	134308181	6	None	Annotated
chr9	136218690	136223175	5	None	Annotated
chr9	138800497	138801332	2	Annotated	None
chr9	139311402	139317672	5	Annotated	None
chr9	139311402	139318129	6	Annotated	None
chr9	140157488	140158801	6	Annotated	None
chr9	140507347	140508116	4	Annotated	None
chrX	3811156	3811392	1	None	Annotated
chrX	11125020	11129101	3	Annotated	None
chrX	20173547	20174367	5	None	Annotated
chrX	30683627	30688702	1	Annotated	None
chrX	30688500	30695569	3	None	Annotated
chrX	102152501	102160665	12	Annotated	None
chrY	1447214	1447705	2	None	None
chrY	2260394	2293345	4	None	Annotated

## Sheet: SK_N_SH_RA
Chrom	Start	End	Junction Reads	Left back-splice site	Right back-splice site
chr1	1606901	1669248	2	Annotated	None
chr1	1770628	1811341	3	Annotated	None
chr1	21386217	21415706	4	None	Annotated
chr1	40944687	40955296	1	None	Annotated
chr1	52289335	52299729	4	Annotated	None
chr1	61291007	61292257	4	Annotated	None
chr1	82348738	82372915	1	None	Annotated
chr1	92554254	92613343	2	Annotated	None
chr1	100661769	100672192	2	None	Annotated
chr1	113471713	113478741	1	Annotated	None
chr1	114076615	114092253	1	None	Annotated
chr1	144048708	144053668	1	None	Annotated
chr1	168200751	168212307	6	Annotated	None
chr1	179739771	179739908	5	None	None
chr1	179774762	179777023	39	None	Annotated
chr1	186375214	186388209	19	Annotated	None
chr1	201591980	201598635	10	None	Annotated
chr1	210847629	210850054	2	Annotated	None
chr1	219366423	219392054	7	Annotated	None
chr1	219366423	219414650	7	Annotated	None
chr1	225273411	225284941	3	None	Annotated
chr1	239649071	239656107	2	None	Annotated
chr1	243846498	244006584	3	None	Annotated
chr10	5759621	5762360	3	Annotated	None
chr10	17421355	17432619	4	None	Annotated
chr10	21148641	21188379	3	Annotated	None
chr10	21157592	21188379	1	Annotated	None
chr10	21169722	21188379	14	Annotated	None
chr10	21234266	21250708	3	None	Annotated
chr10	24669797	24671281	2	Annotated	None
chr10	43127376	43150123	2	Annotated	None
chr10	79795109	79800505	2	Annotated	None
chr10	126631025	126650977	20	Annotated	None
chr11	6629830	6632683	17	None	Annotated
chr11	28232608	28250478	1	Annotated	None
chr11	30516842	30563021	1	Annotated	None
chr11	30516842	30578217	2	Annotated	None
chr11	30557540	30578217	4	Annotated	None
chr11	30578082	30602041	8	None	Annotated
chr11	33563347	33573787	2	None	Annotated
chr11	50264134	50280169	13	None	Annotated
chr11	78478473	78482183	3	None	Annotated
chr11	118967851	118971537	2	Annotated	None
chr12	5269472	5281055	4	None	None
chr12	5269472	5386055	1	None	None
chr12	6645659	6646170	1	Annotated	None
chr12	19615443	19619784	1	Annotated	None
chr12	27521194	27529349	9	Annotated	None
chr12	42778701	42792796	1	None	Annotated
chr12	85736249	85817982	7	Annotated	None
chr12	109212024	109212334	14	Annotated	None
chr12	111916873	111924628	24	None	Annotated
chr12	112884079	112894702	1	Annotated	None
chr12	116668237	116675510	18	None	Annotated
chr12	116674625	116675510	11	None	Annotated
chr12	123593693	123595035	12	None	Annotated
chr12	123594931	123625946	2	Annotated	None
chr12	125397585	125397813	1	None	Annotated
chr13	95243110	95244563	1	None	Annotated
chr14	20811404	20811559	3	None	None
chr14	20811436	20811559	11	None	None
chr14	71880664	71970385	1	Annotated	None
chr14	89192884	89261474	1	Annotated	None
chr14	103865287	103871604	3	None	Annotated
chr15	32814648	32815414	1	None	Annotated
chr15	35388726	35410555	3	None	None
chr15	56207481	56209109	8	Annotated	None
chr15	59427312	59450578	6	None	Annotated
chr15	60734614	60737990	10	Annotated	None
chr15	62881885	62910674	1	Annotated	None
chr15	86028940	86030600	5	Annotated	None
chr16	2105980	2108874	5	None	Annotated
chr16	2683739	2692490	8	Annotated	None
chr16	17252685	17261070	1	Annotated	None
chr16	53175090	53191453	26	None	Annotated
chr16	53188358	53191453	5	None	Annotated
chr16	58593707	58594266	28	None	Annotated
chr16	72556451	72574510	1	None	Annotated
chr16	72556451	72589225	1	None	Annotated
chr17	1673009	1675369	1	None	Annotated
chr17	17769609	17772848	1	Annotated	None
chr17	48560700	48562255	1	Annotated	None
chr17	53478829	53481908	6	Annotated	None
chr17	59134904	59161925	7	None	Annotated
chr17	64119382	64173138	4	None	Annotated
chr17	64119382	64179425	1	None	Annotated
chr18	74561577	74563895	12	None	Annotated
chr19	7455461	7455606	4	None	Annotated
chr19	9763628	9771550	3	None	Annotated
chr19	40540856	40542533	2	None	Annotated
chr19	47421744	47425613	20	None	Annotated
chr19	47421744	47440665	5	None	Annotated
chr19	58290118	58291514	3	Annotated	None
chr2	18825435	18846381	6	None	None
chr2	24786772	24807429	1	None	Annotated
chr2	26596234	26597957	1	Annotated	None
chr2	36668403	36669878	2	None	Annotated
chr2	37516484	37520414	1	None	Annotated
chr2	37543379	37545042	6	Annotated	None
chr2	45169235	45171866	1	None	None
chr2	56815912	56816659	2	None	None
chr2	56815912	56820808	6	None	None
chr2	136360069	136363729	1	Annotated	None
chr2	153431649	153432889	2	Annotated	None
chr2	159851413	159857701	3	None	Annotated
chr2	159854989	159857701	1	None	Annotated
chr2	160405184	160412376	2	None	Annotated
chr2	179400458	179413281	5	Annotated	None
chr2	184022171	184025923	2	Annotated	None
chr2	236877105	236877601	2	Annotated	None
chr20	3285086	3288287	2	Annotated	None
chr21	9827003	9827089	35	None	None
chr21	9827003	9827142	9	None	None
chr21	9827003	9827390	7	None	None
chr21	29584558	29600797	9	Annotated	None
chr21	34923891	34923981	1	None	None
chr21	44105931	44106372	1	None	Annotated
chr3	29737588	29781368	2	None	Annotated
chr3	29737588	29938966	4	None	Annotated
chr3	29975863	29977687	3	None	Annotated
chr3	36570187	36576152	1	Annotated	None
chr3	37291188	37315092	2	None	Annotated
chr3	41923695	41925444	5	None	Annotated
chr3	49372452	49373029	9	None	Annotated
chr3	51504944	51526504	2	Annotated	None
chr3	51575513	51624575	19	None	Annotated
chr3	51575513	51664947	5	None	Annotated
chr3	51575604	51624575	20	None	Annotated
chr3	58092432	58094298	1	None	Annotated
chr3	127806548	127810425	1	Annotated	None
chr3	129599151	129599405	23	Annotated	None
chr3	139296633	139302722	5	Annotated	None
chr3	195086210	195112876	2	None	Annotated
chr3	196449285	196460686	2	Annotated	None
chr3	196807921	196846348	3	Annotated	None
chr4	22390710	22399761	1	Annotated	None
chr4	68656165	68668129	7	Annotated	None
chr4	81216712	81284038	6	None	Annotated
chr4	87073143	87080620	9	None	Annotated
chr4	107874512	107874727	24	None	None
chr4	108109583	108124262	3	Annotated	None
chr4	119125314	119220093	5	None	Annotated
chr4	119172723	119253021	1	None	Annotated
chr4	174145460	174169591	4	None	Annotated
chr5	77711343	77717791	2	Annotated	None
chr5	80911291	80948145	1	Annotated	None
chr5	140305480	140308910	14	None	Annotated
chr5	140772782	140774804	1	None	Annotated
chr6	21999299	22020771	1	None	Annotated
chr6	22020567	22083947	6	Annotated	None
chr6	22063248	22083947	2	Annotated	None
chr6	47976369	48069921	1	Annotated	None
chr6	74432011	74446231	2	None	Annotated
chr6	79752559	79773627	6	Annotated	None
chr6	142094009	142094724	2	None	None
chr7	19040802	19095788	1	None	Annotated
chr7	47512816	47568745	4	None	Annotated
chr7	65268350	65274542	2	None	None
chr7	65867443	65867532	4	None	None
chr7	65892935	65904291	7	Annotated	None
chr7	77260421	77261742	3	None	Annotated
chr7	77407654	77408131	66	Annotated	None
chr7	87600608	87607727	12	None	Annotated
chr7	131058468	131084192	1	None	Annotated
chr8	18622958	18797803	7	Annotated	None
chr8	22899553	22900756	40	None	Annotated
chr8	120797440	120843961	1	Annotated	None
chr8	120814033	120843961	2	Annotated	None
chr8	131249167	131415139	2	Annotated	None
chr8	131370262	131415139	8	Annotated	None
chr8	131414130	131415139	8	Annotated	None
chr9	2804321	2812362	2	None	Annotated
chr9	14273486	14307519	1	None	Annotated
chr9	14987890	14990343	62	None	Annotated
chr9	32924894	32926451	3	None	None
chr9	38426646	38462230	1	None	None
chr9	102216819	102225354	17	None	None
chr9	119078592	119082079	1	Annotated	None
chr9	125650894	125659855	6	None	Annotated
chrX	3740414	3778742	1	Annotated	None
chrX	3811156	3811392	1	None	Annotated
chrX	3811156	3817463	2	None	Annotated
chrX	19983161	20006266	5	Annotated	None
chrX	55634635	55635913	1	None	None
chrX	102080920	102160665	5	Annotated	None
chrX	102081896	102160665	5	Annotated	None
chrX	102089555	102160665	2	None	None
chrX	102139070	102160665	4	Annotated	None
chrX	131415122	131417060	7	None	None
chrX	151804335	151808254	11	None	None
chrX	151804335	151809756	40	None	None

## Sheet: K562
Chrom	Start	End	Junction Reads	Left back-splice site	Right back-splice site
chr1	1770628	1777611	1	Annotated	None
chr1	11270870	11308559	1	Annotated	None
chr1	14717181	14718074	4	None	None
chr1	35822251	35827390	2	None	Annotated
chr1	40319641	40328607	3	Annotated	None
chr1	40726510	40728655	1	Annotated	None
chr1	40869355	40872541	3	None	Annotated
chr1	40869355	40875507	2	None	Annotated
chr1	46379426	46383205	2	None	Annotated
chr1	47737747	47749213	2	Annotated	None
chr1	51199864	51210447	1	None	Annotated
chr1	51204534	51211363	1	Annotated	None
chr1	51210355	51218195	1	Annotated	None
chr1	51246528	51323669	1	None	Annotated
chr1	51320013	51323669	5	None	Annotated
chr1	53787140	53787312	1	None	None
chr1	55637228	55643802	1	Annotated	None
chr1	89318789	89319029	3	None	Annotated
chr1	90178267	90180410	2	Annotated	None
chr1	115267841	115292525	1	Annotated	None
chr1	142801305	142816004	3	None	Annotated
chr1	168200751	168212307	9	Annotated	None
chr1	168205826	168212307	5	Annotated	None
chr1	168208368	168212307	1	Annotated	None
chr1	176113140	176118210	5	None	Annotated
chr1	176153399	176153828	3	None	Annotated
chr1	180242472	180243889	2	Annotated	None
chr1	180605209	180651547	1	None	Annotated
chr1	186375214	186388209	5	Annotated	None
chr1	186386675	186388209	1	Annotated	None
chr1	207532890	207536124	11	Annotated	None
chr1	207820661	207851642	1	None	Annotated
chr1	212139771	212208745	1	Annotated	None
chr1	213251037	213261372	1	Annotated	None
chr1	225273411	225284941	3	None	Annotated
chr1	235408251	235409826	1	None	Annotated
chr1	245008548	245010008	1	None	Annotated
chr1	245008548	245012158	15	None	Annotated
chr1	245008548	245019460	1	None	Annotated
chr1	245008548	245020158	1	None	Annotated
chr1	245008548	245026032	2	None	Annotated
chr10	1123846	1124498	3	Annotated	None
chr10	7230585	7325921	1	Annotated	None
chr10	7407185	7423911	1	None	Annotated
chr10	11639629	11643466	8	Annotated	None
chr10	32337391	32339451	7	Annotated	None
chr10	34805906	34834216	6	Annotated	None
chr10	82264281	82264534	1	None	Annotated
chr10	89635161	89640195	2	None	None
chr10	93718974	93723958	1	None	Annotated
chr10	96201652	96211366	1	Annotated	None
chr10	103427642	103462052	1	Annotated	None
chr11	28232608	28250478	2	Annotated	None
chr11	28232608	28252532	1	Annotated	None
chr11	28249541	28252532	6	None	None
chr11	28250417	28252532	23	None	None
chr11	65201949	65202616	4	None	None
chr11	65201949	65205128	13	None	None
chr11	65202523	65202616	1	None	None
chr11	65202523	65204137	6	None	None
chr11	65202523	65205128	19	None	None
chr11	65203993	65205128	5	None	None
chr11	65204008	65205128	13	None	None
chr11	65270587	65271402	1	None	None
chr11	85722027	85723435	1	None	Annotated
chr11	85742510	85753927	1	Annotated	None
chr11	85960512	85963282	2	None	Annotated
chr11	86778735	86786828	6	Annotated	None
chr11	86782564	86784012	1	Annotated	None
chr11	105328965	105329180	22	None	None
chr11	118277459	118277812	1	None	Annotated
chr11	118882824	118882964	2	None	Annotated
chr11	124158988	124159075	1	None	None
chr12	11273608	11276786	13	Annotated	None
chr12	11273608	11276922	1	Annotated	None
chr12	28408934	28544344	3	None	Annotated
chr12	49332817	49334971	3	None	Annotated
chr12	54849898	54865061	1	None	Annotated
chr12	57453661	57466695	2	None	Annotated
chr12	69653823	69663448	1	Annotated	None
chr12	91746861	91747012	2	None	None
chr12	91746861	91763726	2	None	None
chr12	91746861	91793156	4	None	None
chr12	91759116	91763726	1	None	None
chr12	91791490	91793156	24	None	None
chr12	91900487	91901272	1	None	None
chr12	109212024	109212334	10	Annotated	None
chr12	112370389	112388270	1	Annotated	None
chr12	112381068	112388270	1	Annotated	None
chr12	116674625	116675510	75	None	Annotated
chr12	116674961	116675510	1	None	Annotated
chr12	125292311	125294835	2	None	Annotated
chr13	77836187	77847700	1	Annotated	None
chr13	103289044	103309557	1	None	Annotated
chr13	111545374	111557127	3	Annotated	None
chr13	114170357	114175048	2	None	Annotated
chr14	29327201	29399200	1	None	Annotated
chr14	37709637	37754652	3	None	Annotated
chr15	38575697	38591748	3	None	Annotated
chr15	40468583	40476084	1	None	Annotated
chr15	60734614	60737990	17	Annotated	None
chr15	67523567	67524235	6	None	Annotated
chr15	67523567	67529158	2	None	Annotated
chr15	72791990	72810475	1	None	Annotated
chr15	81434666	81436161	5	None	Annotated
chr15	82443791	82444764	2	None	Annotated
chr15	87851857	87965263	1	None	None
chr15	87851857	87966067	4	None	None
chr15	87898779	87965263	10	None	None
chr15	87898779	87965267	49	None	None
chr15	87898779	87966067	15	None	None
chr15	87949593	87965267	79	None	None
chr15	87949593	87966067	24	None	None
chr15	87949593	87973223	1	None	None
chr15	87949593	87976464	5	None	Annotated
chr15	87949593	88045037	8	None	Annotated
chr15	87962059	88045037	2	None	Annotated
chr15	87962353	88045037	3	None	Annotated
chr15	90404154	90432372	1	None	Annotated
chr15	95695938	95701604	2	None	None
chr15	95695938	95703636	1	None	None
chr16	3735816	3739138	1	None	Annotated
chr16	7855227	7860437	3	None	None
chr16	7901782	7944397	1	None	Annotated
chr16	7926081	7944397	21	None	Annotated
chr16	7929540	7929796	3	None	None
chr16	7929540	7944397	5	None	Annotated
chr16	16126965	16130466	1	Annotated	None
chr16	16620802	16633035	2	None	None
chr16	16742200	16752195	2	None	Annotated
chr16	16826379	16831650	4	None	None
chr16	16829397	16831650	2	None	None
chr16	18245308	18247188	2	Annotated	None
chr16	18632707	18640451	2	None	None
chr16	18712138	18722044	1	None	None
chr16	19717913	19718543	1	None	Annotated
chr16	19717913	19721908	2	None	Annotated
chr16	19717913	19722762	13	None	Annotated
chr16	53175090	53191453	8	None	Annotated
chr16	53967896	53971206	15	Annotated	None
chr16	89484691	89493477	9	Annotated	None
chr17	1756394	1782963	1	Annotated	None
chr17	4200011	4200104	1	Annotated	None
chr17	10584530	10599148	1	None	Annotated
chr17	25398947	25405758	1	None	None
chr17	30689932	30697101	1	Annotated	None
chr17	49124735	49145373	1	Annotated	None
chr17	56081011	56082402	3	None	Annotated
chr17	57138392	57140180	1	Annotated	None
chr17	64492318	64510584	33	Annotated	None
chr17	64509453	64510584	57	None	None
chr17	80739464	80741590	11	Annotated	None
chr18	1269670	1272512	1	None	Annotated
chr18	1269670	1276078	2	None	Annotated
chr18	1269670	1278634	8	None	Annotated
chr18	1269670	1358761	3	None	Annotated
chr18	1358726	1361222	11	Annotated	None
chr18	9367485	9388138	9	None	Annotated
chr18	72347494	72493458	1	None	Annotated
chr18	74574141	74583781	1	None	Annotated
chr18	77801247	77802219	2	None	Annotated
chr19	9763628	9764557	3	None	Annotated
chr19	9763628	9767329	2	None	Annotated
chr19	9763628	9770143	1	None	Annotated
chr19	9763628	9771550	9	None	Annotated
chr19	9763628	9801945	3	None	Annotated
chr19	19584841	19605192	1	None	Annotated
chr19	23962599	23965301	3	None	Annotated
chr19	28927514	28928625	2	None	Annotated
chr19	47421744	47492932	1	None	Annotated
chr19	52084643	52089951	2	Annotated	None
chr2	26587169	26596494	1	Annotated	None
chr2	26587169	26597957	1	Annotated	None
chr2	26590013	26597957	1	Annotated	None
chr2	32117060	32181667	1	Annotated	None
chr2	32142994	32181667	2	Annotated	None
chr2	32168370	32181667	2	Annotated	None
chr2	32515551	32532259	1	Annotated	None
chr2	32654213	32679022	1	Annotated	None
chr2	37543379	37545042	3	Annotated	None
chr2	45773455	45780869	10	None	Annotated
chr2	61597161	61610471	1	None	Annotated
chr2	61609656	61610471	1	None	Annotated
chr2	62449346	62452549	2	Annotated	None
chr2	65540088	65544017	2	None	Annotated
chr2	87882776	87884791	1	Annotated	None
chr2	87906111	87906288	8	Annotated	None
chr2	108266531	108267256	3	None	None
chr2	108309499	108319776	2	None	None
chr2	108309499	108333703	1	None	None
chr2	108315304	108319776	2	None	None
chr2	131117180	131127963	2	Annotated	None
chr2	132310585	132339702	11	None	None
chr2	132332607	132335187	2	None	None
chr2	132332607	132337837	5	None	None
chr2	132332607	132339702	8	None	None
chr2	152322367	152339849	8	None	Annotated
chr2	153549905	153550857	1	None	None
chr2	153551055	153568881	2	Annotated	None
chr2	166781058	166789969	1	Annotated	None
chr2	168686571	168757292	5	None	Annotated
chr2	168688281	168757292	3	None	Annotated
chr2	168699831	168757292	9	None	Annotated
chr2	168726249	168795836	2	Annotated	None
chr2	168748302	168757292	5	None	Annotated
chr2	168755458	168757292	4	None	Annotated
chr2	170802864	170917953	1	None	Annotated
chr2	179404836	179407088	4	None	Annotated
chr2	184016235	184025923	3	Annotated	None
chr2	192543715	192558142	2	Annotated	None
chr2	210880696	210885788	2	Annotated	None
chr2	240929490	240951169	4	Annotated	None
chr20	13463873	13517696	2	Annotated	None
chr20	13532533	13610799	1	None	Annotated
chr20	32677321	32678408	2	None	Annotated
chr20	33324493	33325210	10	Annotated	None
chr20	33350529	33356389	2	None	Annotated
chr20	34243063	34246936	2	None	Annotated
chr20	34389412	34400641	2	Annotated	None
chr20	36685939	36694658	1	None	Annotated
chr20	37049179	37050888	1	None	Annotated
chr20	45874751	45883168	2	Annotated	None
chr20	45909208	45912392	3	None	Annotated
chr20	45918930	45927687	2	Annotated	None
chr20	50843751	50851471	6	None	Annotated
chr20	50921493	50974100	1	Annotated	None
chr20	50971860	50974100	9	Annotated	None
chr20	56991841	56993419	3	None	Annotated
chr21	16363521	16387546	1	None	None
chr21	16386664	16387546	22	Annotated	None
chr21	16412683	16415895	9	None	Annotated
chr21	30677524	30702014	15	None	Annotated
chr21	33740711	33747770	1	Annotated	None
chr21	38459546	38470460	4	Annotated	None
chr21	45475691	45500008	2	None	Annotated
chr21	47630601	47643048	1	Annotated	None
chr21	47641767	47643048	1	Annotated	None
chr22	31998197	31998888	1	Annotated	None
chr22	35567427	35577710	8	Annotated	None
chr22	35567427	35579387	2	Annotated	None
chr22	35577557	35579387	1	None	None
chr22	35577557	35591012	2	None	Annotated
chr22	35588177	35591012	5	None	Annotated
chr22	40948109	40982116	1	Annotated	None
chr22	40982036	40990739	5	None	Annotated
chr3	9477751	9478572	4	None	Annotated
chr3	18082940	18090801	2	Annotated	None
chr3	28295221	28304871	10	None	Annotated
chr3	33644443	33681635	1	Annotated	None
chr3	37385095	37385215	1	None	None
chr3	38284037	38284269	1	None	Annotated
chr3	47102890	47103836	3	None	Annotated
chr3	51575513	51624575	35	None	Annotated
chr3	51575513	51664947	1	None	Annotated
chr3	57643406	57665452	2	Annotated	None
chr3	93714717	93716145	1	Annotated	None
chr3	118402533	118445769	2	None	None
chr3	118454059	118456809	1	None	None
chr3	125032151	125050077	3	Annotated	None
chr3	158376714	158384175	1	None	Annotated
chr3	171799152	171830380	5	None	Annotated
chr3	172477950	172501699	2	None	Annotated
chr3	183368083	183382822	1	Annotated	None
chr3	184603744	184648356	1	None	Annotated
chr3	186681572	186692262	5	Annotated	None
chr4	25347169	25353837	1	Annotated	None
chr4	40146251	40155887	1	Annotated	None
chr4	68358586	68359419	1	Annotated	None
chr4	68664356	68668129	7	None	None
chr4	88084709	88091390	1	None	Annotated
chr4	88084709	88116842	11	None	Annotated
chr4	95441243	95445026	2	None	Annotated
chr4	127353063	127356094	6	None	None
chr4	127353063	127386768	2	None	None
chr4	127383373	127385457	7	None	None
chr4	127384184	127385457	15	None	None
chr4	127563965	127619468	4	None	None
chr4	127616392	127619468	6	None	None
chr4	128808594	128818062	1	None	Annotated
chr4	135087640	135087803	2	None	None
chr4	139979822	139994721	2	None	Annotated
chr4	153332454	153391140	6	Annotated	None
chr4	173050948	173051079	1	None	None
chr4	183812555	183815758	2	None	Annotated
chr4	183812555	183836728	9	None	Annotated
chr5	10213602	10224173	5	None	None
chr5	10213602	10227759	12	None	Annotated
chr5	14673750	14693203	2	Annotated	None
chr5	14687629	14693203	1	Annotated	None
chr5	36982266	36986403	16	None	Annotated
chr5	50309184	50311396	52	None	None
chr5	53450409	53578157	5	Annotated	None
chr5	53576036	53578157	9	None	None
chr5	53578100	53603776	2	None	Annotated
chr5	78937277	78938808	1	None	None
chr5	78941965	78944516	1	None	Annotated
chr5	79974745	80015354	1	Annotated	None
chr5	104578993	104582067	164	None	None
chr5	115653213	115653997	3	None	None
chr5	134294729	134296418	1	Annotated	None
chr5	138614015	138614838	5	Annotated	None
chr5	144817634	144819722	1	None	None
chr5	144817634	144820632	3	None	None
chr5	145044816	145050379	2	None	None
chr5	145044816	145050390	4	None	None
chr5	145083537	145083858	8	None	Annotated
chr5	176468126	176469465	1	Annotated	None
chr5	176596394	176639196	1	None	Annotated
chr5	176674924	176678854	1	None	Annotated
chr6	532468	534580	1	Annotated	None
chr6	20546576	20577388	3	Annotated	None
chr6	20772037	20781496	1	None	Annotated
chr6	27094093	27095180	3	None	Annotated
chr6	27667375	27670196	1	None	Annotated
chr6	33747612	33754551	2	None	Annotated
chr6	34309638	34310809	7	Annotated	None
chr6	34309638	34338269	4	Annotated	None
chr6	34822461	34831975	1	None	Annotated
chr6	35565024	35614627	4	Annotated	None
chr6	35586872	35614143	4	Annotated	None
chr6	35586872	35614627	20	Annotated	None
chr6	35604790	35614627	14	Annotated	None
chr6	35610496	35614627	4	Annotated	None
chr6	41902633	41905132	1	None	Annotated
chr6	44081623	44084366	31	None	Annotated
chr6	47471015	47471790	16	Annotated	None
chr6	53133884	53156761	19	None	Annotated
chr6	53133884	53160505	3	None	Annotated
chr6	56915571	56920595	6	Annotated	None
chr6	91233396	91252248	1	Annotated	None
chr6	106649846	106665476	1	Annotated	None
chr6	125366356	125366700	1	Annotated	None
chr6	126327987	126360071	4	Annotated	None
chr6	126333916	126361991	2	Annotated	None
chr6	126428396	126452004	1	None	None
chr6	126434011	126437001	9	None	None
chr6	135299816	135331897	1	Annotated	None
chr6	135323871	135331897	2	Annotated	None
chr6	142073516	142094156	1	None	None
chr6	142094009	142094724	2	None	None
chr6	142171268	142231148	1	None	Annotated
chr7	762390	764501	2	None	None
chr7	6062417	6068663	2	None	Annotated
chr7	6154953	6155357	3	Annotated	None
chr7	10490876	10492405	22	None	None
chr7	10600609	10601204	12	None	None
chr7	10600609	10604664	5	None	None
chr7	10601108	10601204	47	None	None
chr7	10601108	10604664	136	None	None
chr7	10601108	10688096	9	None	None
chr7	12370408	12384095	1	None	Annotated
chr7	12417767	12428984	1	None	Annotated
chr7	53759619	53760166	4	Annotated	None
chr7	65860865	65872351	1	Annotated	None
chr7	65892935	65904291	5	Annotated	None
chr7	65918427	66038537	2	None	Annotated
chr7	66038371	66041916	6	Annotated	None
chr7	66323063	66328680	1	Annotated	None
chr7	66345273	66345879	1	None	None
chr7	75784314	75785772	1	None	None
chr7	76279714	76280199	4	None	None
chr7	77407654	77408131	21	Annotated	None
chr7	91603024	91610272	6	Annotated	None
chr7	102453723	102462650	7	None	Annotated
chr7	102453723	102495307	4	None	Annotated
chr7	103557521	103599218	5	Annotated	None
chr7	120629768	120687047	1	None	Annotated
chr7	120764384	120885063	1	Annotated	None
chr7	128218006	128220148	2	None	Annotated
chr7	132989920	133059756	1	None	Annotated
chr7	132990021	133002144	2	None	Annotated
chr7	133981019	133986862	1	None	Annotated
chr7	135635346	135645474	6	Annotated	None
chr7	151960100	151983461	1	Annotated	None
chr7_gl000195_random	48443	49119	2	None	Annotated
chr7_gl000195_random	140413	140875	1	Annotated	None
chr8	19745500	19749414	5	None	None
chr8	30921258	30990022	1	None	Annotated
chr8	42719759	42720632	29	None	Annotated
chr8	42719759	42729149	1	None	Annotated
chr8	61134866	61144938	3	None	Annotated
chr8	62593526	62626566	1	Annotated	None
chr8	93872454	93880914	4	None	None
chr8	99135253	99140768	1	None	Annotated
chr8	100146462	100168971	3	None	Annotated
chr8	130275540	130280109	1	None	None
chr8	130365049	130411930	5	None	Annotated
chr8	130501908	130503994	1	None	None
chr8	130503239	130503994	2	None	None
chr8	130563060	130565041	1	None	None
chr8	130563060	130565056	5	None	None
chr8	130563060	130570180	2	None	None
chr8	141357855	141370292	6	None	Annotated
chr9	33932559	33933644	1	Annotated	None
chr9	37126308	37127260	28	Annotated	None
chr9	37126308	37165932	8	Annotated	None
chr9	37126308	37188455	2	Annotated	None
chr9	37127091	37302228	4	None	Annotated
chr9	37127091	37304310	1	None	Annotated
chr9	37144631	37147442	10	None	Annotated
chr9	37147358	37165932	1	Annotated	None
chr9	37186708	37188455	1	Annotated	None
chr9	86274694	86281348	2	None	Annotated
chr9	86274694	86284242	9	None	Annotated
chr9	86274694	86301070	1	None	Annotated
chr9	99021420	99021626	1	None	None
chr9	103070781	103072657	1	Annotated	None
chr9	111826756	111853432	2	Annotated	None
chr9	114218285	114235280	2	None	Annotated
chr9	126571392	126641300	1	None	Annotated
chr9	127447109	127480150	1	None	None
chr9	127480061	127495628	9	None	Annotated
chr9	138824902	138825361	3	None	Annotated
chr9	138824902	138831605	3	None	Annotated
chr9	139281936	139282325	1	Annotated	None
chrX	3772732	3772968	1	None	Annotated
chrX	3772732	3817463	1	None	Annotated
chrX	3811156	3817463	1	None	Annotated
chrX	11074055	11129101	5	Annotated	None
chrX	13333560	13334318	2	None	None
chrX	48752630	48754141	1	None	Annotated
chrX	84301451	84303379	1	Annotated	None
chrX	102089555	102120080	1	None	Annotated
chrX	129917520	129943235	8	Annotated	None
chrX	130877123	130928494	7	None	Annotated
chrX	134852695	134856962	2	Annotated	None
chrX	134869957	134874222	1	Annotated	None
chrX	134945989	134967502	2	None	Annotated
chrX	151804335	151808254	9	None	None
chrX	154016301	154018297	1	None	Annotated
chrX	154016301	154020560	2	None	Annotated

## Sheet: HepG2
Chrom	Start	End	Junction Reads	Left back-splice site	Right back-splice site
chr1	1499984	1500296	3	None	Annotated
chr1	1718764	1749314	2	None	Annotated
chr1	3653489	3662750	1	Annotated	None
chr1	16119331	16123438	9	None	None
chr1	51121113	51246716	3	Annotated	None
chr1	51171457	51246716	2	Annotated	None
chr1	53332212	53333449	1	None	Annotated
chr1	153905607	153905795	2	None	Annotated
chr1	161928235	161928500	1	Annotated	None
chr1	247319707	247323115	21	None	Annotated
chr10	71912018	71920825	4	None	Annotated
chr10	89624210	89653866	3	None	Annotated
chr10	89624210	89712016	1	None	Annotated
chr10	127540861	127574245	1	Annotated	None
chr11	61034933	61036486	5	Annotated	None
chr11	64825150	64825722	2	None	Annotated
chr11	65202523	65204137	18	None	None
chr11	65202523	65205128	21	None	None
chr11	70935742	70951968	4	Annotated	None
chr12	20522976	20709644	1	None	Annotated
chr12	20546828	20709644	2	None	Annotated
chr12	42521847	42523653	3	None	Annotated
chr12	110825543	110834187	6	Annotated	None
chr12	116674625	116675510	2	None	Annotated
chr14	94847397	94847478	5	None	Annotated
chr15	44920866	44949461	1	Annotated	None
chr15	44941063	44949461	5	Annotated	None
chr15	44943688	44949461	2	Annotated	None
chr16	2105980	2108874	4	None	Annotated
chr16	2683739	2692490	3	Annotated	None
chr16	58593707	58594266	7	None	Annotated
chr16	74368789	74369341	1	Annotated	None
chr16	75111809	75127565	3	None	Annotated
chr16	89484691	89488713	22	Annotated	None
chr16	89484691	89493477	5	Annotated	None
chr16	89493174	89493477	2	None	None
chr17	15531119	15546130	1	None	Annotated
chr17	80020770	80022945	1	None	Annotated
chr18	32902351	32907027	2	None	None
chr19	3538538	3538754	1	None	Annotated
chr19	3538538	3551192	4	None	Annotated
chr19	41092649	41092850	1	None	Annotated
chr19	47421744	47492932	1	None	Annotated
chr2	10762141	10784498	3	None	Annotated
chr2	10762141	10794673	1	None	Annotated
chr2	36615114	36623930	9	None	Annotated
chr20	54978523	54978854	1	Annotated	None
chr20	62559325	62562375	1	None	Annotated
chr21	30693541	30734034	2	Annotated	None
chr21	38792600	38794954	6	Annotated	None
chr21	44949637	44949842	3	None	Annotated
chr21	46548316	46564616	2	Annotated	None
chr21	46595644	46627303	1	Annotated	None
chr21	46600244	46627303	1	Annotated	None
chr3	9792628	9793641	9	Annotated	None
chr3	12546652	12548334	2	Annotated	None
chr3	51575513	51624575	13	None	Annotated
chr3	51575513	51664947	1	None	Annotated
chr3	125032151	125042193	1	Annotated	None
chr3	179437727	179439523	1	Annotated	None
chr5	80419457	80422982	3	None	Annotated
chr5	145044816	145050379	4	None	None
chr6	43403488	43421775	3	Annotated	None
chr6	82767655	82769396	24	None	None
chr6	126434011	126437001	4	None	None
chr6	126451802	126452004	1	None	None
chr6	157405795	157406212	3	Annotated	None
chr7	75721380	75729274	9	None	Annotated
chr7	75728757	75730732	2	Annotated	None
chr7	131058468	131060252	3	None	Annotated
chr8	42719759	42720632	3	None	Annotated
chr8	48192449	48395931	1	Annotated	None
chr8	128152521	128174329	1	None	None
chr8	128152988	128161917	2	None	None
chr8	128152988	128174329	2	None	None
chr8	128152988	128186609	17	None	None
chr8	128152988	128200360	3	None	Annotated
chr8	128174166	128176771	5	None	None
chr8	128174166	128186609	23	None	None
chr8	128174166	128200129	1	None	Annotated
chr8	128186434	128200360	2	None	Annotated
chr8	128186434	128215465	2	None	None
chr8	128186434	128231211	3	None	None
chr8	128200029	128202227	3	Annotated	None
chr8	128200029	128231211	1	Annotated	None
chr8	128231054	128231164	152	Annotated	None
chr8	128231054	128231211	3045	Annotated	None
chr8	128231054	128231234	9	Annotated	None
chr8	128231054	128232650	37	Annotated	None
chr8	128231054	128235889	33	Annotated	None
chr8	128231054	128235911	54	Annotated	None
chr8	128231054	128236720	21	Annotated	None
chr8	128231054	128236929	76	Annotated	None
chr8	128231059	128231211	136	None	None
chr8	128231059	128236929	5	None	None
chr8	128944298	128951922	1	None	Annotated
chr9	20907148	20933131	2	Annotated	None
chr9	37126308	37127260	1	Annotated	None
chr9	74477466	74489999	6	None	Annotated
chr9	134049473	134053797	2	None	Annotated
chr9	134362601	134367647	1	None	Annotated
chrX	3811156	3811392	1	None	Annotated
chrX	30688500	30695569	1	None	Annotated

## Sheet: BJ
Chrom	Start	End	Junction Reads	Left back-splice site	Right back-splice site
chr1	28119820	28120143	1	None	Annotated
chr1	94132651	94140497	2	None	Annotated
chr1	101372108	101387397	6	None	Annotated
chr1	144048708	144053668	4	None	Annotated
chr1	168204338	168212307	3	Annotated	None
chr1	201591980	201592734	8	None	Annotated
chr1	201591980	201598635	14	None	Annotated
chr1	232615372	232709968	2	Annotated	None
chr1	232649602	232669329	1	Annotated	None
chr10	60454684	60461903	2	None	Annotated
chr10	71912018	71920825	25	None	Annotated
chr10	71912018	71921687	58	None	Annotated
chr10	95211806	95220108	4	Annotated	None
chr10	96207391	96234540	4	None	Annotated
chr10	105420529	105420872	2	None	Annotated
chr10	126631025	126650977	28	Annotated	None
chr11	12495291	12525985	1	Annotated	None
chr11	28232608	28250478	2	Annotated	None
chr11	57369507	57382069	2	Annotated	None
chr11	65204008	65205128	6	None	None
chr11	122953792	122966630	10	Annotated	None
chr12	2602367	2622150	4	None	Annotated
chr12	47606379	47610472	5	None	Annotated
chr12	53848533	53865591	1	None	Annotated
chr12	109212024	109212334	9	Annotated	None
chr12	111916873	111924628	6	None	Annotated
chr12	111916873	111948386	1	None	Annotated
chr12	114823280	114841736	2	Annotated	None
chr12	116434280	116435032	3	Annotated	None
chr12	116668337	116675510	50	None	Annotated
chr12	116674625	116675510	13	None	Annotated
chr13	114173849	114175048	12	None	Annotated
chr13	114203739	114205130	9	Annotated	None
chr13	114549499	114550961	4	Annotated	None
chr14	52182048	52182217	1	None	Annotated
chr14	64957078	64962277	1	Annotated	None
chr14	71455286	71462642	15	None	Annotated
chr14	71455286	71476441	2	None	Annotated
chr14	71455286	71479919	2	None	Annotated
chr14	101361035	101361376	2	None	Annotated
chr14	101402108	101455127	12	Annotated	None
chr14	101403739	101415933	6	None	Annotated
chr14	101403739	101435882	7	None	Annotated
chr14	101403739	101455127	5	None	None
chr14	101409101	101455127	1	Annotated	None
chr14	101413370	101455127	2	Annotated	None
chr14	101417768	101455127	4	Annotated	None
chr14	101434984	101455127	10	Annotated	None
chr14	101438598	101444059	3	Annotated	None
chr14	101440462	101444059	2	Annotated	None
chr14	101446913	101464448	2	Annotated	None
chr14	101449797	101453043	4	Annotated	None
chr14	101449797	101455127	4	Annotated	None
chr14	101452955	101455127	1	Annotated	None
chr15	56207481	56209109	3	Annotated	None
chr15	71525369	71549054	1	None	Annotated
chr15	77657504	77681144	2	Annotated	None
chr15	78326816	78327081	3	None	None
chr15	81162875	81188401	5	None	Annotated
chr15	81162875	81201647	7	None	Annotated
chr16	11114049	11146581	5	Annotated	None
chr16	84873130	84879510	2	None	Annotated
chr16	89484691	89488713	15	Annotated	None
chr16	89484691	89493477	8	Annotated	None
chr17	3548254	3553555	13	None	None
chr17	78237461	78247203	6	None	Annotated
chr17	78237461	78252709	2	None	Annotated
chr18	71067646	71075957	1	None	None
chr19	9763628	9764557	1	None	Annotated
chr19	9763628	9771497	4	None	Annotated
chr19	9763628	9771550	5	None	Annotated
chr19	13064953	13065340	4	None	Annotated
chr19	47421744	47425613	12	None	Annotated
chr19	47421744	47440665	37	None	Annotated
chr19	47421744	47492932	11	None	Annotated
chr19	47919908	47920873	1	Annotated	None
chr19	58290118	58291514	11	Annotated	None
chr2	26587169	26597957	4	Annotated	None
chr2	26596234	26597957	2	Annotated	None
chr2	33353498	33447218	3	None	Annotated
chr2	36586046	36596392	5	None	Annotated
chr2	36586046	36623930	26	None	Annotated
chr2	36586046	36669878	79	None	Annotated
chr2	36596250	36623930	18	None	Annotated
chr2	36596250	36669878	24	None	Annotated
chr2	36596250	36691798	1	None	Annotated
chr2	36596250	36706837	2	None	Annotated
chr2	36615114	36623930	117	None	Annotated
chr2	36615114	36669878	237	None	Annotated
chr2	36615114	36691798	45	None	Annotated
chr2	36615114	36706837	23	None	Annotated
chr2	36615114	36726490	1	None	Annotated
chr2	37543379	37545042	2	Annotated	None
chr2	148811501	148812018	17	None	Annotated
chr2	149098543	149099905	1	None	Annotated
chr20	464571	476446	1	None	Annotated
chr20	32619327	32619556	1	Annotated	None
chr21	16386664	16387546	2	Annotated	None
chr21	30677524	30702014	1	None	Annotated
chr22	43032484	43032852	3	None	Annotated
chr22	46493805	46505788	9	Annotated	None
chr3	36915616	36950022	1	Annotated	None
chr3	51575513	51624575	43	None	Annotated
chr3	51575513	51661770	7	None	Annotated
chr3	51575604	51624575	24	None	Annotated
chr3	55504479	55513512	1	None	Annotated
chr3	61608136	61609229	16	None	None
chr3	74565806	74570343	3	None	Annotated
chr3	99394503	99396732	9	Annotated	None
chr3	125567072	125567290	13	None	None
chr3	129599151	129599405	18	Annotated	None
chr3	138407716	138409904	1	Annotated	None
chr3	171799152	171830380	5	None	Annotated
chr3	176816253	176825896	18	Annotated	None
chr3	197009549	197024297	2	Annotated	None
chr3	197593023	197598333	1	None	Annotated
chr4	81216712	81284038	8	None	Annotated
chr4	85818063	85819750	1	Annotated	None
chr4	183812555	183836728	6	None	Annotated
chr4	186110104	186112366	3	None	Annotated
chr5	9357811	9380135	1	None	Annotated
chr5	9379934	9423350	12	Annotated	None
chr5	9421788	9437964	3	None	Annotated
chr5	14222890	14223039	1	None	None
chr5	14460797	14480120	2	None	Annotated
chr5	14678789	14693203	38	Annotated	None
chr5	15601527	15616181	3	None	Annotated
chr5	95242226	95268417	6	Annotated	None
chr5	180472811	180473139	1	None	None
chr6	77981056	77983024	4	None	None
chr6	102337514	102355461	4	Annotated	None
chr6	116720360	116720825	1	Annotated	None
chr7	5087600	5097410	2	None	Annotated
chr7	6771464	6771586	1	None	Annotated
chr7	47544875	47568745	3	None	Annotated
chr8	98708431	98712080	1	None	Annotated
chr8	103341317	103357771	1	Annotated	None
chr8	119251953	119253509	4	None	None
chr9	33293650	33295425	2	None	Annotated
chr9	33293677	33295425	7	None	Annotated
chr9	38456114	38471930	4	None	None
chr9	79115831	79118672	2	Annotated	None
chr9	88913681	88914187	1	Annotated	None
chr9	113703700	113771481	5	Annotated	None
chr9	113703700	113798481	18	Annotated	None
chr9	113734352	113798481	13	Annotated	None
chr9	113771427	113773970	4	None	Annotated
chrX	3811156	3824273	1	None	Annotated
chrX	54584868	54587080	2	Annotated	None
chrX	102080920	102160665	1	Annotated	None
chrX	109289584	109352374	2	None	Annotated
chrX	109289584	109388104	2	None	Annotated
chrY	14813938	14821476	8	None	Annotated

## Sheet: GM12878
Chrom	Start	End	Junction Reads	Left back-splice site	Right back-splice site
chr1	1606901	1669248	2	Annotated	None
chr1	23356961	23366927	1	Annotated	None
chr1	31452908	31455487	16	Annotated	None
chr1	35846861	35881315	1	None	Annotated
chr1	41651792	41660071	3	Annotated	None
chr1	42730785	42744455	12	Annotated	None
chr1	51061792	51246716	1	Annotated	None
chr1	112237962	112242229	2	Annotated	None
chr1	154782426	154794660	7	None	Annotated
chr1	168204338	168212307	2	Annotated	None
chr1	181479622	181480646	1	None	Annotated
chr1	183498102	183520325	1	None	Annotated
chr1	186375214	186388209	6	Annotated	None
chr1	207069338	207078492	1	None	Annotated
chr1	210847629	210850054	2	Annotated	None
chr1	234593102	234595072	1	None	Annotated
chr10	7290509	7325921	1	Annotated	None
chr10	31230503	31263581	1	Annotated	None
chr10	31644072	31647262	11	Annotated	None
chr10	32758312	32762951	1	None	Annotated
chr10	69785302	69804315	3	Annotated	None
chr10	71912018	71921687	7	None	Annotated
chr10	96207391	96234540	2	None	Annotated
chr10	121940741	121968507	41	None	None
chr10	121940741	122047979	1	None	None
chr10	121946629	121949705	6	None	None
chr10	121946629	121968507	9	None	None
chr10	121964506	121968507	48	None	None
chr10	126631025	126650977	2	Annotated	None
chr10	126650855	126650977	1	None	None
chr11	8693443	8693932	2	None	Annotated
chr11	28250417	28252532	4	None	None
chr11	33563347	33566924	2	None	Annotated
chr11	65204008	65205128	4	None	None
chr11	65268121	65268285	1	None	None
chr11	121403172	121406153	3	Annotated	None
chr12	4219087	4219446	88	None	Annotated
chr12	4383166	4388085	7	None	Annotated
chr12	11905383	11912998	2	Annotated	None
chr12	15834159	15866259	2	Annotated	None
chr12	26922281	26943160	8	None	Annotated
chr12	27132716	27133564	1	Annotated	None
chr12	53848533	53865591	1	None	Annotated
chr12	95249675	95250050	137	None	None
chr12	109212024	109212334	10	Annotated	None
chr12	116674625	116675510	3	None	Annotated
chr13	28840854	28845003	3	None	Annotated
chr13	64739164	64797402	6	None	None
chr13	64739164	64819610	4	None	None
chr13	64793356	64819610	22	None	None
chr13	81261370	81303709	1	None	None
chr13	81303649	81331421	5	None	None
chr14	22839010	22850808	3	None	Annotated
chr14	22839010	22887925	1	None	Annotated
chr14	67511176	67525503	1	None	Annotated
chr14	71470983	71485879	1	None	Annotated
chr14	71948871	71996087	1	None	Annotated
chr14	75269258	75276722	2	Annotated	None
chr14	75505042	75513292	1	Annotated	None
chr14	83674805	83685774	6	None	None
chr14	83674805	83697146	5	None	None
chr14	83735241	83755920	3	None	None
chr14	83775158	83775278	1	None	None
chr14	95932267	95942172	1	Annotated	None
chr15	25638892	25654354	1	None	Annotated
chr15	25638892	25657118	9	None	Annotated
chr15	30950968	31042759	2	None	Annotated
chr15	54304844	54308083	22	None	Annotated
chr15	56434975	56535485	2	Annotated	None
chr15	72511284	72523525	2	Annotated	None
chr15	101462979	101464934	1	None	Annotated
chr16	11114049	11146581	5	Annotated	None
chr16	12060051	12061700	6	Annotated	None
chr16	12077422	12096900	17	None	Annotated
chr16	23999829	24046868	2	None	Annotated
chr16	30492759	30492995	2	Annotated	None
chr16	72318470	72425114	1	None	None
chr16	72318475	72325312	1	None	None
chr16	72424969	72461356	1	None	Annotated
chr16	89484691	89493477	4	Annotated	None
chr16	89493174	89497734	2	None	Annotated
chr17	18821602	18832270	1	None	Annotated
chr17	30697018	30700472	1	None	Annotated
chr17	54926056	54934026	1	Annotated	None
chr17	56081011	56082402	1	None	Annotated
chr17	64492318	64510584	21	Annotated	None
chr17	64509453	64510584	93	None	None
chr17	80833373	80851508	1	None	Annotated
chr17_ctg5_hap1	1345291	1346669	18	Annotated	None
chr18	8624935	8625992	1	Annotated	None
chr18	9337261	9360069	6	None	Annotated
chr18	67602967	67614669	1	None	Annotated
chr19	14694168	14696642	1	Annotated	None
chr19	14694168	14698272	1	Annotated	None
chr19	14694168	14700905	1	Annotated	None
chr19	14698425	14700905	1	Annotated	None
chr19	58290118	58291514	3	Annotated	None
chr2	8427467	8466554	6	Annotated	None
chr2	8502307	8532215	1	Annotated	None
chr2	12128383	12129484	3	None	None
chr2	12128383	12147969	17	None	Annotated
chr2	12300731	12306981	2	None	Annotated
chr2	24778883	24816590	2	Annotated	None
chr2	24786772	24787299	1	None	Annotated
chr2	24786772	24807429	1	None	Annotated
chr2	32716548	32718734	2	None	Annotated
chr2	45773455	45780869	1	None	Annotated
chr2	61118817	61149134	3	Annotated	None
chr2	132332607	132335187	1	None	None
chr2	147574598	147637054	1	None	None
chr2	148811501	148812018	2	None	Annotated
chr2	186946056	186951097	2	Annotated	None
chr20	7045487	7050341	17	None	Annotated
chr20	7045487	7050389	5	None	None
chr20	7048495	7050341	93	None	Annotated
chr20	7048495	7050389	5	None	None
chr20	7048495	7073246	84	None	None
chr20	10430003	10438879	6	None	Annotated
chr20	32617574	32619410	35	None	Annotated
chr21	16363521	16415895	3	None	Annotated
chr21	16412683	16415895	20	None	Annotated
chr21	26793019	26793977	3	Annotated	None
chr21	30677524	30693835	1	None	Annotated
chr21	38792600	38798083	12	Annotated	None
chr22	29582184	29584444	1	None	None
chr22	34157357	34243729	3	Annotated	None
chr22	34243644	34252790	4	None	Annotated
chr22	40948109	40982116	3	Annotated	None
chr22	40982036	40990739	2	None	Annotated
chr22	42280845	42282655	3	Annotated	None
chr3	9494571	9506356	3	None	Annotated
chr3	28174291	28174569	1	None	None
chr3	41923695	41925444	3	None	Annotated
chr3	45867747	45877276	1	None	Annotated
chr3	45867747	45879543	1	None	Annotated
chr3	51497129	51526504	2	Annotated	None
chr3	51504944	51526504	1	Annotated	None
chr3	51575513	51624575	33	None	Annotated
chr3	51575513	51661770	3	None	Annotated
chr3	51575604	51624575	1	None	Annotated
chr3	105922761	105933176	6	None	None
chr3	105927929	105933176	13	None	None
chr3	105927929	105967513	2	None	None
chr3	105933039	105933176	1	None	None
chr3	112188604	112218317	2	Annotated	None
chr3	118269666	118402619	1	Annotated	None
chr3	118381256	118445769	4	Annotated	None
chr3	118381256	118488583	1	Annotated	None
chr3	118488453	118488583	1	None	None
chr3	193361740	193409921	1	None	Annotated
chr4	2640543	2641586	1	None	Annotated
chr4	13338516	13343936	1	None	None
chr4	13338516	13383218	3	None	Annotated
chr4	17961887	17974508	2	None	Annotated
chr4	38828305	38831158	31	None	Annotated
chr4	89340453	89341580	8	None	None
chr4	106092971	106111662	3	None	Annotated
chr4	183812555	183815758	5	None	Annotated
chr4	183812555	183836728	9	None	Annotated
chr5	14673750	14693203	9	Annotated	None
chr5	14678789	14693203	10	Annotated	None
chr5	42468878	42629205	2	None	Annotated
chr5	78914469	78915906	7	None	Annotated
chr5	86109465	86114729	5	None	None
chr5	97004254	97006388	6	Annotated	None
chr5	130561448	130651837	1	None	Annotated
chr5	130590787	130591885	27	Annotated	None
chr5	162333085	162333673	5	None	None
chr6	6493125	6493371	5	Annotated	None
chr6	56535438	56708036	2	Annotated	None
chr6	56564450	56708036	2	Annotated	None
chr6	77860917	77921770	2	None	None
chr6	83806430	83806834	4	None	Annotated
chr6	87920168	87928449	20	None	Annotated
chr6	111093409	111095140	1	None	Annotated
chr6	137041587	137105857	4	Annotated	None
chr6	146185523	146216113	1	None	Annotated
chr6	149285545	149314202	1	Annotated	None
chr7	20379895	20420454	4	None	Annotated
chr7	20379895	20444476	1	None	Annotated
chr7	64768455	64778666	1	None	None
chr7	77407654	77408131	13	Annotated	None
chr7	82032920	82033171	3	None	None
chr7	87600608	87607727	2	None	Annotated
chr7	87859070	87859275	1	None	Annotated
chr7	95906507	95939003	1	Annotated	None
chr7	119914954	119915801	2	None	Annotated
chr7	127541436	127544872	4	None	Annotated
chr7	139415730	139441837	1	Annotated	None
chr7	151181822	151191771	4	Annotated	None
chr8	22880209	22881773	1	None	Annotated
chr8	22880209	22900756	1	None	Annotated
chr8	22899553	22900756	29	None	Annotated
chr8	42719755	42720632	8	None	Annotated
chr8	42719755	42725255	1	None	Annotated
chr8	42719759	42720632	40	None	Annotated
chr8	101458535	101464528	3	None	None
chr8	101464218	101464528	2	None	None
chr8	101464218	101468507	23	None	None
chr8	119633773	119776623	6	Annotated	None
chr8	119736757	119776623	1	Annotated	None
chr8	135575773	135577664	1	None	Annotated
chr9	3394784	3395596	5	None	Annotated
chr9	5656582	5657806	9	Annotated	None
chr9	5656582	5666072	1	Annotated	None
chr9	37144631	37147442	2	None	Annotated
chr9	37144631	37327831	1	None	Annotated
chr9	77631183	77642067	1	Annotated	None
chr9	86274694	86284242	2	None	Annotated
chr9	126571392	126641300	1	None	Annotated
chr9	132757121	132761338	5	Annotated	None
chrX	3744641	3820112	1	None	None
chrX	3772732	3779037	3	None	Annotated
chrX	3772732	3785847	1	None	Annotated
chrX	3811156	3811392	1	None	Annotated
chrX	27879697	27887119	4	None	None
chrX	27886877	27887119	4	None	None
chrX	54584868	54587080	1	Annotated	None
chrX	56310745	56310984	2	Annotated	None
chrX	78445323	78481401	2	None	None
chrX	78481350	78487775	2	None	None
chrX	120425589	120431305	1	None	None

## Sheet: NHEK
Chrom	Start	End	Junction Reads	Left back-splice site	Right back-splice site
chr1	42730785	42744455	9	Annotated	None
chr1	51246528	51267349	1	None	Annotated
chr1	144048708	144053668	1	None	Annotated
chr1	213037066	213043510	1	Annotated	None
chr1	233372001	233372726	8	None	Annotated
chr10	96207391	96234540	1	None	Annotated
chr10	99915849	99917330	2	Annotated	None
chr10	114286845	114428768	1	Annotated	None
chr11	31474264	31484852	3	None	Annotated
chr11	57563048	57604999	2	Annotated	None
chr12	11199618	11276922	6	Annotated	None
chr12	27521194	27529349	3	Annotated	None
chr12	109212024	109212334	13	Annotated	None
chr12	116674625	116675510	11	None	Annotated
chr13	77644765	77692630	1	Annotated	None
chr13	114173849	114175048	3	None	Annotated
chr14	52026394	52037128	2	None	Annotated
chr14	65542491	65544754	1	None	Annotated
chr14	77817350	77818094	1	None	Annotated
chr15	71519913	71549054	4	None	Annotated
chr15	71640643	71704162	2	None	Annotated
chr15	72283443	72302791	1	Annotated	None
chr15	73064123	73065028	1	Annotated	None
chr17	18110128	18111689	1	Annotated	None
chr17	64492318	64510584	3	Annotated	None
chr17	64509453	64510584	13	None	None
chr17_ctg5_hap1	1345291	1346669	7	Annotated	None
chr18	21526107	21526540	4	Annotated	None
chr18	74561577	74593468	1	None	Annotated
chr19	58290118	58291514	2	Annotated	None
chr2	32664575	32679022	1	Annotated	None
chr2	36596250	36623930	4	None	Annotated
chr2	36615114	36623930	40	None	Annotated
chr2	36615114	36669878	33	None	Annotated
chr2	36615114	36726490	1	None	Annotated
chr2	207025605	207025856	1	None	Annotated
chr20	32617574	32619410	21	None	Annotated
chr21	16363521	16415895	3	None	Annotated
chr3	5233954	5255207	1	None	Annotated
chr3	9477751	9478572	2	None	Annotated
chr3	32479446	32483505	11	None	Annotated
chr3	50084592	50091828	1	None	Annotated
chr3	61608136	61608814	8	None	None
chr3	111622812	111632549	7	None	Annotated
chr3	111622812	111639266	3	None	Annotated
chr3	124996569	125050077	1	Annotated	None
chr3	129599151	129599405	7	Annotated	None
chr3	133876964	133914026	9	None	Annotated
chr4	15638116	15665977	2	Annotated	None
chr4	30788348	30921991	3	None	Annotated
chr4	107225780	107230146	1	None	Annotated
chr4	160931380	160948509	3	None	None
chr5	14678789	14693203	4	Annotated	None
chr5	49694940	49707217	5	None	Annotated
chr5	79498704	79501179	1	Annotated	None
chr5	167302990	167305460	14	Annotated	None
chr7	66177153	66178455	1	Annotated	None
chr7	73938402	73960139	1	None	Annotated
chr8	25099710	25101273	20	None	Annotated
chr8	53586404	53586829	1	Annotated	None
chr8	131370262	131374034	2	Annotated	None
chr9	33932559	33933644	13	Annotated	None
chr9	35657813	35657932	8	None	None
chr9	102721761	102722437	2	None	Annotated
chrX	102152501	102160665	2	Annotated	None
chrX	107181177	107181861	5	None	None
chrX	154645235	154649223	1	None	None

## Sheet: H1
Chrom	Start	End	Junction Reads	Left back-splice site	Right back-splice site
chr1	1747194	1779475	4	Annotated	None
chr1	1770628	1811341	1	Annotated	None
chr1	3656796	3662750	1	Annotated	None
chr1	3659367	3662750	1	Annotated	None
chr1	12042030	12057478	1	None	Annotated
chr1	21386217	21415706	2	None	Annotated
chr1	31447497	31455487	2	Annotated	None
chr1	42730785	42744455	2	Annotated	None
chr1	64474976	64489135	1	Annotated	None
chr1	82356140	82372915	2	None	Annotated
chr1	100508628	100524284	1	None	Annotated
chr1	168200751	168212307	4	Annotated	None
chr1	213037066	213043510	2	Annotated	None
chr1	237550455	237632487	1	None	Annotated
chr10	7262372	7325921	1	Annotated	None
chr10	70411602	70433244	1	Annotated	None
chr10	70432651	70433244	1	Annotated	None
chr10	74475519	74475660	1	None	Annotated
chr10	99915849	99917330	2	Annotated	None
chr10	103868791	103871293	3	None	Annotated
chr10	114845805	114849299	2	None	Annotated
chr10	126628942	126631876	27	None	Annotated
chr10	126628942	126655350	1	None	Annotated
chr10	126727565	126763412	1	Annotated	None
chr11	71629930	71637556	3	Annotated	None
chr11	128993340	128997200	9	Annotated	None
chr12	9758948	9769947	1	None	Annotated
chr12	67285680	67328313	2	None	None
chr12	109212024	109212334	6	Annotated	None
chr12	116434280	116435032	2	Annotated	None
chr12	116674625	116675510	11	None	Annotated
chr12	121951078	122019039	1	Annotated	None
chr14	38668250	38668716	13	None	None
chr14	71479750	71522279	1	None	Annotated
chr14	103865287	103871604	2	None	Annotated
chr15	25264173	25265871	2	Annotated	None
chr15	25284857	25285994	2	None	None
chr15	25285949	25344425	3	None	Annotated
chr15	25287622	25330469	2	None	Annotated
chr15	25287944	25318010	1	None	Annotated
chr15	25301629	25346037	2	Annotated	None
chr15	65009458	65033441	3	None	Annotated
chr15	82207687	82218366	3	None	None
chr15	82218013	82218366	16	None	None
chr17	27936372	27936532	1	Annotated	None
chr19	12768876	12769327	1	Annotated	None
chr19	23316881	23321357	2	Annotated	None
chr19	23965173	23991616	1	None	Annotated
chr19	47421744	47425613	1	None	Annotated
chr19	47421744	47440665	5	None	Annotated
chr2	26587169	26597957	3	Annotated	None
chr2	32168370	32181667	4	Annotated	None
chr2	36615114	36669878	5	None	Annotated
chr2	62449346	62452549	2	Annotated	None
chr2	111597375	111598982	4	None	Annotated
chr2	136071058	136094828	1	Annotated	None
chr2	152322367	152339849	1	None	Annotated
chr2	153551055	153568881	16	Annotated	None
chr2	159444736	159445499	7	Annotated	None
chr2	175805543	175809671	1	None	Annotated
chr2	175805543	175816930	3	None	Annotated
chr2	179404836	179407088	5	None	Annotated
chr2	184022171	184025923	1	Annotated	None
chr2	207025605	207025856	4	None	Annotated
chr2	209864747	210017110	1	None	None
chr2	210016968	210044149	1	None	None
chr2	217001810	217002881	1	Annotated	None
chr20	13415690	13591566	3	Annotated	None
chr20	13550153	13591566	1	Annotated	None
chr21	9826984	9827137	2	None	None
chr21	34922525	34923595	1	None	Annotated
chr22	22160113	22162135	1	None	Annotated
chr22	33960833	33973950	17	Annotated	None
chr22	40982036	40990739	5	None	Annotated
chr3	51575513	51624575	33	None	Annotated
chr3	61608136	61608814	10	None	None
chr3	61608136	61609229	23	None	None
chr3	66499439	66512933	3	None	Annotated
chr3	110611236	110612677	3	None	Annotated
chr3	129546645	129547347	1	Annotated	None
chr4	17961887	17974508	2	None	Annotated
chr4	22365863	22394313	1	None	Annotated
chr4	88813404	88814019	6	None	None
chr4	93179003	93190507	1	None	Annotated
chr4	129214088	129224190	7	None	Annotated
chr5	14678789	14693203	11	Annotated	None
chr5	102231554	102237117	1	None	Annotated
chr5	138614015	138614838	5	Annotated	None
chr5	140305480	140308910	26	None	Annotated
chr5	141005760	141007779	1	Annotated	None
chr6	14790220	14790329	1	None	None
chr6	21979173	21999441	2	Annotated	None
chr6	88224145	88226598	2	None	Annotated
chr6	142094009	142094724	3	None	None
chr7	21060486	21062928	3	Annotated	None
chr7	21750193	21751478	2	None	Annotated
chr7	33644476	33645344	1	Annotated	None
chr7	37570175	37570328	10	None	None
chr7	64768455	64778666	2	None	None
chr7	73646392	73661093	1	None	Annotated
chr7	76279714	76280199	1	None	None
chr7	121753171	121773788	3	Annotated	None
chr7	132990021	133002144	1	None	Annotated
chr7	156469079	156471904	1	Annotated	None
chr8	35111920	35132191	1	None	None
chr8	35117493	35125404	1	None	None
chr8	35117493	35132191	17	None	None
chr8	35131963	35132191	1	None	None
chr8	35131963	35144272	1	None	None
chr8	42719759	42720632	12	None	Annotated
chr8	68163551	68172161	1	None	Annotated
chr8	104664432	104709524	9	None	Annotated
chr8	104664851	104709524	2	None	Annotated
chr8	142161717	142166088	4	Annotated	None
chr9	20004247	20004385	1	None	None
chr9	81037009	81065113	2	None	None
chr9	95018961	95032260	1	Annotated	None
chr9	99897827	99902236	3	None	None
chr9	99917885	99973769	2	None	Annotated
chr9	99918813	99973769	2	None	Annotated
chr9	99940545	99941822	1	Annotated	None
chr9	127480061	127495628	7	None	Annotated
chrX	3811156	3811392	1	None	Annotated
chrX	64295353	64295792	6	None	None
chrX	64586517	64588878	2	None	None
chrX	93952894	93953008	2	None	None
chrX	111903854	111915070	7	Annotated	None
chrX	128166326	128168518	2	None	None
chrX	136648680	136651224	1	None	Annotated

[truncated: 6 more sheets: AG04450, HUVEC, H9_p(A)−, PA1_p(A)−, H9_p(A)−_RNaseR, PA1_p(A)−_RNaseR]
