# Supplementary material for: Diverse alternative back-splicing and alternative splicing landscape of circular RNAs
Source: Genome Res. 2016 Sep;26(9):1277–87. doi: 10.1101/gr.202895.115 (PMC5052039; doi:10.1101/gr.202895.115)
Supplement: Supplemental Material [file supp_gr.202895.115_Supplemental_Table_S4.xlsx]

## Sheet: Table Legend
Supplemental Table S4. List of all four basic types of alternative splicing in circRNAs from the examined cell lines.
Four basic types of alternative splicing events (cassette exons, retained introns and alternative 5'/3' splice site) detected from the examined 13 cell lines, listed with relevant matrix metrics (PSI for cassette exons, PIR for retained introns and PSU for alternative 5'/3' splice site) calculated for circular isoform or linear isoform. For alternative 5'/3' splice site selection in circRNAs, onl…

## Sheet: cassette exon
Chrom:Start-End/Strand	A549_circular_psi	A549_linear_psi	HeLa_S3_circular_psi	HeLa_S3_linear_psi	SK-N-SH_RA_circular_psi	SK-N-SH_RA_linear_psi	K562_circular_psi	K562_linear_psi	HepG2_circular_psi	HepG2_linear_psi	BJ_circular_psi	BJ_linear_psi	GM12878_circular_psi	GM12878_linear_psi	NHEK_circular_psi	NHEK_linear_psi	H1_circular_psi	H1_linear_psi	AG04450_circular_psi	AG04450_linear_psi	HUVEC_circular_psi	HUVEC_linear_psi	H9_p(A)−_circular_psi	H9_p(A)−_linear_psi	PA1_p(A)−_circular_psi	PA1_p(A)−_linear_psi	H9_p(A)−_RNaseR_circular_psi	H9_p(A)−_RNaseR_linear_psi	PA1_p(A)−_RNaseR_circular_psi	PA1_p(A)−_RNaseR_linear_psi
chr1:100182965-100183081/-	NA	NA	NA	NA	NA	NA	99.221	96.252	NA	NA	NA	NA	NA	NA	NA	NA	NA	NA	NA	NA	NA	NA	NA	NA	NA	NA	NA	NA	NA	NA
chr1:100206348-100206496/-	NA	NA	NA	NA	NA	NA	99.458	94.801	NA	NA	NA	NA	NA	NA	NA	NA	NA	NA	NA	NA	NA	NA	NA	NA	NA	NA	NA	NA	NA	NA
chr1:100534028-100534142/+	NA	NA	NA	NA	NA	NA	NA	NA	NA	NA	NA	NA	NA	NA	100	96.404	NA	NA	NA	NA	100	91.16	NA	NA	NA	NA	NA	NA	NA	NA
chr1:10386168-10386417/+	42.282	24.706	NA	NA	NA	NA	NA	NA	NA	NA	NA	NA	NA	NA	NA	NA	NA	NA	NA	NA	NA	NA	NA	NA	NA	NA	NA	NA	NA	NA
chr1:10523487-10523677/-	NA	NA	NA	NA	NA	NA	NA	NA	NA	NA	NA	NA	100	96.392	NA	NA	NA	NA	NA	NA	NA	NA	NA	NA	NA	NA	NA	NA	NA	NA
chr1:109240568-109240639/+	NA	NA	NA	NA	68.254	35.211	NA	NA	NA	NA	NA	NA	NA	NA	NA	NA	NA	NA	NA	NA	NA	NA	NA	NA	NA	NA	NA	NA	NA	NA
chr1:109482666-109484173/-	NA	NA	NA	NA	NA	NA	100	96.569	NA	NA	NA	NA	NA	NA	NA	NA	NA	NA	NA	NA	NA	NA	NA	NA	NA	NA	NA	NA	NA	NA
chr1:110558046-110558153/+	100	97.833	NA	NA	NA	NA	NA	NA	NA	NA	NA	NA	NA	NA	NA	NA	NA	NA	NA	NA	NA	NA	NA	NA	NA	NA	NA	NA	NA	NA
chr1:113093222-113093315/-	90.476	47.368	75.309	55.66	NA	NA	NA	NA	NA	NA	NA	NA	NA	NA	100	61.538	NA	NA	NA	NA	NA	NA	NA	NA	NA	NA	NA	NA	NA	NA
chr1:113143415-113143470/-	NA	NA	100	84.699	NA	NA	NA	NA	NA	NA	NA	NA	NA	NA	NA	NA	NA	NA	NA	NA	NA	NA	NA	NA	NA	NA	NA	NA	NA	NA
chr1:114443857-114444005/-	NA	NA	NA	NA	NA	NA	NA	NA	NA	NA	NA	NA	NA	NA	NA	NA	100	80.198	NA	NA	NA	NA	NA	NA	NA	NA	NA	NA	NA	NA
chr1:115280091-115280184/-	NA	NA	NA	NA	32.462	18.732	NA	NA	NA	NA	33.082	18.247	NA	NA	NA	NA	NA	NA	20.596	12.172	NA	NA	NA	NA	NA	NA	NA	NA	NA	NA
chr1:117632676-117632830/+	NA	NA	NA	NA	NA	NA	NA	NA	NA	NA	NA	NA	NA	NA	NA	NA	100	90.909	NA	NA	NA	NA	NA	NA	NA	NA	NA	NA	NA	NA
chr1:117948170-117948267/+	NA	NA	NA	NA	NA	NA	NA	NA	NA	NA	NA	NA	NA	NA	100	95.918	NA	NA	NA	NA	NA	NA	NA	NA	NA	NA	NA	NA	NA	NA
chr1:118008955-118009049/+	NA	NA	100	84.615	NA	NA	NA	NA	NA	NA	NA	NA	NA	NA	NA	NA	NA	NA	NA	NA	NA	NA	NA	NA	NA	NA	NA	NA	NA	NA
chr1:1197648-1197770/-	NA	NA	26.389	11.897	NA	NA	NA	NA	NA	NA	13.043	3.79	NA	NA	NA	NA	NA	NA	NA	NA	NA	NA	NA	NA	NA	NA	NA	NA	NA	NA
chr1:1200162-1200210/-	NA	NA	NA	NA	NA	NA	NA	NA	NA	NA	6.952	1.873	NA	NA	NA	NA	NA	NA	NA	NA	NA	NA	NA	NA	NA	NA	NA	NA	NA	NA
chr1:1201477-1201670/-	NA	NA	100	2.439	NA	NA	NA	NA	NA	NA	NA	NA	NA	NA	NA	NA	NA	NA	NA	NA	NA	NA	NA	NA	NA	NA	NA	NA	NA	NA
chr1:12024231-12024357/+	NA	NA	NA	NA	NA	NA	NA	NA	NA	NA	NA	NA	NA	NA	100	99.038	NA	NA	NA	NA	NA	NA	NA	NA	NA	NA	NA	NA	NA	NA
chr1:12052335-12052520/+	NA	NA	1.405	0	NA	NA	NA	NA	NA	NA	NA	NA	NA	NA	NA	NA	NA	NA	NA	NA	NA	NA	NA	NA	NA	NA	NA	NA	NA	NA
chr1:12418514-12418657/+	NA	NA	NA	NA	NA	NA	98.953	93.103	NA	NA	NA	NA	NA	NA	NA	NA	NA	NA	NA	NA	NA	NA	NA	NA	NA	NA	NA	NA	NA	NA
chr1:1247819-1247881/-	NA	NA	97.474	84.971	NA	NA	NA	NA	NA	NA	NA	NA	NA	NA	NA	NA	NA	NA	NA	NA	NA	NA	NA	NA	NA	NA	NA	NA	NA	NA
chr1:1249680-1249745/-	NA	NA	NA	NA	NA	NA	NA	NA	100	98.387	NA	NA	NA	NA	NA	NA	NA	NA	NA	NA	NA	NA	NA	NA	NA	NA	NA	NA	NA	NA
chr1:1254675-1254904/-	NA	NA	100	97.297	NA	NA	NA	NA	NA	NA	NA	NA	NA	NA	NA	NA	NA	NA	NA	NA	NA	NA	NA	NA	NA	NA	NA	NA	NA	NA
chr1:12638745-12638802/-	NA	NA	NA	NA	99.479	99.048	NA	NA	NA	NA	99.485	97.636	NA	NA	NA	NA	NA	NA	NA	NA	NA	NA	NA	NA	NA	NA	NA	NA	NA	NA
chr1:12638745-12638984/-	99.43	97.585	NA	NA	99.758	99.583	NA	NA	NA	NA	99.754	98.71	NA	NA	NA	NA	NA	NA	NA	NA	NA	NA	NA	NA	NA	NA	NA	NA	NA	NA
chr1:12639320-12639440/-	99.051	97.104	NA	NA	99.666	99.378	NA	NA	NA	NA	99.694	98.517	NA	NA	NA	NA	NA	NA	NA	NA	NA	NA	NA	NA	NA	NA	NA	NA	NA	NA
chr1:1323871-1323890/-	NA	NA	13.462	2.954	NA	NA	NA	NA	NA	NA	NA	NA	NA	NA	NA	NA	NA	NA	NA	NA	NA	NA	NA	NA	NA	NA	NA	NA	NA	NA
chr1:1324005-1324123/-	NA	NA	13.462	3.782	NA	NA	NA	NA	NA	NA	NA	NA	NA	NA	NA	NA	NA	NA	NA	NA	NA	NA	NA	NA	NA	NA	NA	NA	NA	NA
chr1:144048708-144048769/+	NA	NA	NA	NA	NA	NA	NA	NA	NA	NA	NA	NA	NA	NA	NA	NA	NA	NA	NA	NA	NA	NA	NA	NA	NA	NA	NA	NA	57.143	10.744
chr1:144604409-144604508/+	32.847	15.436	20.892	13.15	40.397	15.179	NA	NA	NA	NA	NA	NA	37.209	18.033	NA	NA	NA	NA	NA	NA	NA	NA	NA	NA	NA	NA	NA	NA	NA	NA
chr1:144604477-144604508/+	30.303	14.865	22.311	10.692	40.199	17.749	NA	NA	NA	NA	NA	NA	37.931	18.699	NA	NA	NA	NA	NA	NA	NA	NA	NA	NA	NA	NA	NA	NA	NA	NA
chr1:144617149-144617252/+	94.646	55.738	NA	NA	94.928	56.886	NA	NA	NA	NA	NA	NA	NA	NA	NA	NA	NA	NA	NA	NA	NA	NA	NA	NA	NA	NA	NA	NA	NA	NA
chr1:144618081-144618296/+	72.556	60.976	NA	NA	NA	NA	NA	NA	NA	NA	NA	NA	NA	NA	NA	NA	NA	NA	NA	NA	NA	NA	NA	NA	NA	NA	NA	NA	NA	NA
chr1:144619346-144619419/+	100	81.053	NA	NA	100	54.545	NA	NA	NA	NA	NA	NA	NA	NA	NA	NA	NA	NA	NA	NA	NA	NA	NA	NA	NA	NA	NA	NA	NA	NA
chr1:144955215-144955292/-	NA	NA	NA	NA	NA	NA	46.566	26.32	NA	NA	NA	NA	NA	NA	NA	NA	NA	NA	NA	NA	NA	NA	NA	NA	NA	NA	NA	NA	NA	NA
chr1:145017907-145018002/-	NA	NA	NA	NA	NA	NA	NA	NA	NA	NA	2.747	0	NA	NA	NA	NA	NA	NA	NA	NA	NA	NA	NA	NA	NA	NA	NA	NA	NA	NA
chr1:1451013-1451238/+	NA	NA	33.333	0	NA	NA	NA	NA	NA	NA	NA	NA	NA	NA	NA	NA	NA	NA	NA	NA	NA	NA	NA	NA	NA	NA	NA	NA	NA	NA
chr1:145789295-145789392/-	NA	NA	NA	NA	NA	NA	NA	NA	NA	NA	NA	NA	NA	NA	NA	NA	NA	NA	NA	NA	NA	NA	NA	NA	NA	NA	NA	NA	26.531	3.546
chr1:145898862-145898959/+	NA	NA	NA	NA	NA	NA	NA	NA	NA	NA	NA	NA	NA	NA	NA	NA	NA	NA	NA	NA	NA	NA	NA	NA	NA	NA	NA	NA	39.394	2.19
chr1:1462540-1462618/+	NA	NA	NA	NA	NA	NA	8.511	3.318	NA	NA	NA	NA	NA	NA	NA	NA	NA	NA	NA	NA	NA	NA	NA	NA	NA	NA	NA	NA	NA	NA
chr1:146638076-146638197/-	NA	NA	NA	NA	NA	NA	NA	NA	NA	NA	NA	NA	NA	NA	100	92.037	NA	NA	NA	NA	NA	NA	NA	NA	NA	NA	NA	NA	NA	NA
chr1:146736080-146736243/+	NA	NA	100	98.296	NA	NA	NA	NA	NA	NA	NA	NA	NA	NA	NA	NA	NA	NA	NA	NA	NA	NA	NA	NA	NA	NA	NA	NA	NA	NA
chr1:146751703-146751864/+	NA	NA	NA	NA	NA	NA	92.982	0	NA	NA	NA	NA	NA	NA	NA	NA	NA	NA	NA	NA	NA	NA	NA	NA	NA	NA	NA	NA	NA	NA
chr1:150468957-150469104/+	NA	NA	NA	NA	70.229	48.454	NA	NA	NA	NA	NA	NA	NA	NA	NA	NA	NA	NA	NA	NA	59.732	37.107	NA	NA	NA	NA	NA	NA	96.33	80.519
chr1:150469285-150469384/+	NA	NA	NA	NA	73.978	59.394	NA	NA	NA	NA	82.353	65.714	NA	NA	NA	NA	NA	NA	NA	NA	NA	NA	NA	NA	NA	NA	NA	NA	NA	NA
chr1:150997086-150997271/+	NA	NA	NA	NA	96.585	91.69	NA	NA	NA	NA	NA	NA	NA	NA	NA	NA	NA	NA	NA	NA	NA	NA	NA	NA	NA	NA	NA	NA	NA	NA
chr1:151076037-151076151/+	NA	NA	88.162	74.295	NA	NA	NA	NA	NA	NA	89.222	72.174	NA	NA	NA	NA	NA	NA	NA	NA	NA	NA	NA	NA	NA	NA	NA	NA	NA	NA
chr1:151196846-151196882/+	NA	NA	NA	NA	NA	NA	NA	NA	NA	NA	6.189	2.9	NA	NA	NA	NA	NA	NA	NA	NA	NA	NA	NA	NA	NA	NA	NA	NA	37.931	4.762
chr1:151210657-151210741/+	100	97.619	NA	NA	NA	NA	NA	NA	100	95.719	NA	NA	NA	NA	NA	NA	NA	NA	NA	NA	NA	NA	NA	NA	NA	NA	NA	NA	NA	NA
chr1:151214598-151214745/+	NA	NA	95.05	88.926	NA	NA	NA	NA	NA	NA	NA	NA	NA	NA	90.144	86.002	NA	NA	NA	NA	NA	NA	NA	NA	NA	NA	NA	NA	NA	NA
chr1:151214655-151214745/+	NA	NA	92.258	81.568	NA	NA	NA	NA	NA	NA	NA	NA	NA	NA	NA	NA	NA	NA	NA	NA	NA	NA	NA	NA	NA	NA	NA	NA	NA	NA
chr1:151236389-151236504/+	NA	NA	NA	NA	NA	NA	NA	NA	NA	NA	NA	NA	NA	NA	99.715	98.976	NA	NA	NA	NA	NA	NA	NA	NA	NA	NA	NA	NA	NA	NA
chr1:151280049-151280277/-	99.083	95.288	NA	NA	NA	NA	NA	NA	NA	NA	NA	NA	NA	NA	NA	NA	NA	NA	NA	NA	NA	NA	NA	NA	NA	NA	NA	NA	NA	NA
chr1:151380884-151381057/-	NA	NA	NA	NA	NA	NA	NA	NA	NA	NA	NA	NA	NA	NA	NA	NA	NA	NA	NA	NA	NA	NA	NA	NA	100	92.473	NA	NA	NA	NA
chr1:151396424-151396762/-	NA	NA	NA	NA	NA	NA	NA	NA	NA	NA	NA	NA	100	96.166	NA	NA	NA	NA	NA	NA	NA	NA	NA	NA	NA	NA	NA	NA	NA	NA
chr1:151402078-151402187/-	NA	NA	NA	NA	NA	NA	NA	NA	NA	NA	NA	NA	100	95.484	NA	NA	NA	NA	NA	NA	NA	NA	NA	NA	NA	NA	NA	NA	NA	NA
chr1:151413403-151413562/-	86.169	71.103	96.181	89.583	NA	NA	NA	NA	94.667	80.623	NA	NA	NA	NA	NA	NA	89.588	83.051	NA	NA	NA	NA	NA	NA	NA	NA	NA	NA	NA	NA
chr1:153603486-153603587/-	NA	NA	98.485	88.966	NA	NA	NA	NA	NA	NA	NA	NA	NA	NA	NA	NA	NA	NA	NA	NA	NA	NA	NA	NA	NA	NA	NA	NA	NA	NA
chr1:153603486-153604301/-	NA	NA	98.524	83.838	NA	NA	NA	NA	NA	NA	NA	NA	NA	NA	NA	NA	NA	NA	NA	NA	NA	NA	NA	NA	NA	NA	NA	NA	NA	NA
chr1:153727117-153727215/+	NA	NA	NA	NA	NA	NA	NA	NA	100	96.226	NA	NA	NA	NA	NA	NA	NA	NA	NA	NA	NA	NA	NA	NA	NA	NA	NA	NA	NA	NA
chr1:153925280-153925310/-	NA	NA	NA	NA	100	96.277	NA	NA	NA	NA	NA	NA	NA	NA	NA	NA	NA	NA	NA	NA	NA	NA	NA	NA	NA	NA	NA	NA	NA	NA
chr1:154233367-154233585/+	NA	NA	NA	NA	100	98.686	NA	NA	NA	NA	NA	NA	NA	NA	NA	NA	NA	NA	NA	NA	NA	NA	NA	NA	NA	NA	NA	NA	NA	NA
chr1:155028555-155028725/+	NA	NA	NA	NA	NA	NA	NA	NA	NA	NA	NA	NA	NA	NA	100	99.085	NA	NA	NA	NA	NA	NA	NA	NA	NA	NA	NA	NA	NA	NA
chr1:155145040-155145104/-	NA	NA	NA	NA	NA	NA	NA	NA	NA	NA	NA	NA	100	96.833	NA	NA	NA	NA	NA	NA	NA	NA	NA	NA	NA	NA	NA	NA	NA	NA
chr1:155170884-155170995/-	100	90	NA	NA	NA	NA	NA	NA	NA	NA	NA	NA	NA	NA	NA	NA	NA	NA	NA	NA	NA	NA	NA	NA	NA	NA	NA	NA	NA	NA
chr1:155235650-155235745/-	NA	NA	NA	NA	NA	NA	NA	NA	NA	NA	NA	NA	NA	NA	NA	NA	NA	NA	97.838	90.997	NA	NA	NA	NA	NA	NA	NA	NA	NA	NA
chr1:155236519-155236686/-	NA	NA	NA	NA	NA	NA	NA	NA	NA	NA	NA	NA	NA	NA	NA	NA	NA	NA	100	94.02	NA	NA	NA	NA	NA	NA	NA	NA	NA	NA
chr1:155410293-155410384/-	NA	NA	NA	NA	NA	NA	NA	NA	NA	NA	NA	NA	NA	NA	NA	NA	12	0	NA	NA	NA	NA	NA	NA	NA	NA	NA	NA	NA	NA
chr1:155646338-155646537/-	NA	NA	NA	NA	NA	NA	NA	NA	NA	NA	NA	NA	NA	NA	NA	NA	NA	NA	NA	NA	99.601	97.052	NA	NA	NA	NA	NA	NA	NA	NA
chr1:155648948-155649104/-	NA	NA	NA	NA	NA	NA	100	1.506	NA	NA	NA	NA	2.264	0	NA	NA	NA	NA	NA	NA	NA	NA	NA	NA	NA	NA	NA	NA	NA	NA
chr1:155678823-155678916/+	9.974	6.702	NA	NA	NA	NA	NA	NA	NA	NA	NA	NA	NA	NA	NA	NA	NA	NA	NA	NA	NA	NA	NA	NA	NA	NA	NA	NA	NA	NA
chr1:155695172-155695202/+	NA	NA	NA	NA	NA	NA	NA	NA	100	97.633	NA	NA	NA	NA	NA	NA	NA	NA	NA	NA	NA	NA	NA	NA	NA	NA	NA	NA	NA	NA
chr1:155695172-155695281/+	NA	NA	NA	NA	NA	NA	NA	NA	100	98.491	NA	NA	NA	NA	NA	NA	NA	NA	NA	NA	NA	NA	NA	NA	NA	NA	NA	NA	NA	NA
chr1:155746209-155746272/-	NA	NA	NA	NA	44.134	0	NA	NA	NA	NA	NA	NA	NA	NA	NA	NA	NA	NA	NA	NA	NA	NA	NA	NA	NA	NA	NA	NA	NA	NA
chr1:155896466-155896630/-	NA	NA	100	97.806	NA	NA	NA	NA	NA	NA	NA	NA	NA	NA	NA	NA	NA	NA	NA	NA	NA	NA	NA	NA	NA	NA	NA	NA	NA	NA
chr1:155984751-155984860/-	NA	NA	NA	NA	NA	NA	NA	NA	NA	NA	100	98.808	NA	NA	NA	NA	NA	NA	NA	NA	NA	NA	NA	NA	NA	NA	NA	NA	NA	NA
chr1:155988060-155988159/-	NA	NA	NA	NA	100	99.835	NA	NA	NA	NA	100	99.712	NA	NA	NA	NA	NA	NA	NA	NA	NA	NA	NA	NA	NA	NA	NA	NA	NA	NA
chr1:156202110-156202216/+	NA	NA	NA	NA	NA	NA	NA	NA	NA	NA	100	94.076	NA	NA	NA	NA	NA	NA	NA	NA	NA	NA	NA	NA	NA	NA	NA	NA	NA	NA
chr1:156304658-156304709/-	NA	NA	97.99	96.811	NA	NA	NA	NA	NA	NA	NA	NA	NA	NA	NA	NA	NA	NA	NA	NA	NA	NA	NA	NA	NA	NA	NA	NA	NA	NA
chr1:156446285-156446306/-	NA	NA	NA	NA	NA	NA	NA	NA	NA	NA	100	5.098	NA	NA	NA	NA	NA	NA	NA	NA	NA	NA	NA	NA	NA	NA	NA	NA	NA	NA
chr1:156504292-156504525/-	100	93.617	NA	NA	NA	NA	NA	NA	NA	NA	NA	NA	NA	NA	NA	NA	NA	NA	NA	NA	NA	NA	NA	NA	NA	NA	NA	NA	NA	NA
chr1:156841414-156841547/+	NA	NA	NA	NA	97.03	87.983	NA	NA	NA	NA	NA	NA	NA	NA	NA	NA	NA	NA	NA	NA	NA	NA	NA	NA	NA	NA	NA	NA	NA	NA
chr1:156843424-156843751/+	NA	NA	NA	NA	100	93.662	NA	NA	NA	NA	NA	NA	NA	NA	NA	NA	NA	NA	NA	NA	NA	NA	NA	NA	NA	NA	NA	NA	NA	NA
chr1:156845311-156845458/+	NA	NA	NA	NA	100	96.639	NA	NA	NA	NA	NA	NA	NA	NA	NA	NA	NA	NA	NA	NA	NA	NA	NA	NA	NA	NA	NA	NA	NA	NA
chr1:15960292-15960374/+	NA	NA	NA	NA	NA	NA	8.081	0	NA	NA	NA	NA	NA	NA	NA	NA	NA	NA	NA	NA	NA	NA	NA	NA	NA	NA	NA	NA	NA	NA
chr1:160213749-160213824/-	NA	NA	NA	NA	NA	NA	NA	NA	NA	NA	NA	NA	97.143	92.239	NA	NA	NA	NA	NA	NA	NA	NA	NA	NA	NA	NA	NA	NA	NA	NA
chr1:16095022-16095125/+	NA	NA	NA	NA	NA	NA	NA	NA	NA	NA	95.89	91.957	NA	NA	NA	NA	NA	NA	NA	NA	NA	NA	NA	NA	NA	NA	NA	NA	NA	NA
chr1:161298185-161298287/+	NA	NA	NA	NA	NA	NA	NA	NA	NA	NA	NA	NA	NA	NA	NA	NA	83.931	74.612	NA	NA	NA	NA	NA	NA	NA	NA	NA	NA	NA	NA
chr1:161309351-161309378/+	2.949	0.658	NA	NA	3.602	0.759	NA	NA	NA	NA	NA	NA	NA	NA	NA	NA	2.72	0	NA	NA	NA	NA	NA	NA	NA	NA	NA	NA	NA	NA
chr1:16528601-16528615/-	NA	NA	17.526	0	NA	NA	NA	NA	NA	NA	NA	NA	NA	NA	NA	NA	NA	NA	NA	NA	NA	NA	NA	NA	NA	NA	NA	NA	NA	NA
chr1:16528601-16528701/-	NA	NA	NA	NA	NA	NA	NA	NA	NA	NA	37.748	0.699	NA	NA	NA	NA	NA	NA	NA	NA	NA	NA	NA	NA	NA	NA	NA	NA	NA	NA
chr1:16632297-16632414/-	100	96.923	NA	NA	NA	NA	NA	NA	NA	NA	NA	NA	NA	NA	NA	NA	NA	NA	NA	NA	NA	NA	NA	NA	NA	NA	NA	NA	NA	NA
chr1:16636730-16636852/-	100	1.818	NA	NA	4.721	0	3.586	1.176	NA	NA	NA	NA	NA	NA	NA	NA	NA	NA	NA	NA	NA	NA	NA	NA	NA	NA	NA	NA	NA	NA
chr1:167935866-167935959/+	NA	NA	NA	NA	NA	NA	NA	NA	NA	NA	100	96.226	NA	NA	NA	NA	NA	NA	NA	NA	NA	NA	NA	NA	NA	NA	NA	NA	NA	NA
chr1:167988782-167988905/+	NA	NA	NA	NA	NA	NA	NA	NA	NA	NA	NA	NA	32.601	2.885	NA	NA	NA	NA	NA	NA	NA	NA	NA	NA	NA	NA	NA	NA	NA	NA
chr1:167992225-167992285/+	48.029	27.692	NA	NA	NA	NA	NA	NA	NA	NA	NA	NA	NA	NA	NA	NA	NA	NA	NA	NA	NA	NA	NA	NA	NA	NA	NA	NA	NA	NA
chr1:168007608-168007726/+	100	96.715	100	92.453	NA	NA	NA	NA	NA	NA	NA	NA	NA	NA	NA	NA	NA	NA	NA	NA	NA	NA	NA	NA	NA	NA	NA	NA	NA	NA
chr1:168204338-168204420/+	NA	NA	NA	NA	NA	NA	98.83	96.809	NA	NA	NA	NA	NA	NA	NA	NA	NA	NA	NA	NA	NA	NA	NA	NA	NA	NA	NA	NA	NA	NA
chr1:1688217-1688321/-	NA	NA	21.094	5.66	NA	NA	NA	NA	NA	NA	NA	NA	NA	NA	NA	NA	NA	NA	NA	NA	NA	NA	NA	NA	NA	NA	NA	NA	NA	NA
chr1:169770023-169770112/+	NA	NA	NA	NA	NA	NA	NA	NA	NA	NA	100	71.795	NA	NA	NA	NA	NA	NA	NA	NA	NA	NA	NA	NA	NA	NA	NA	NA	NA	NA
chr1:171537385-171537478/+	NA	NA	NA	NA	NA	NA	NA	NA	NA	NA	NA	NA	NA	NA	100	97.439	NA	NA	NA	NA	NA	NA	NA	NA	NA	NA	NA	NA	NA	NA
chr1:171540458-171540560/+	98.39	92.797	100	92.857	NA	NA	NA	NA	100	92.029	NA	NA	NA	NA	NA	NA	99.314	96.62	NA	NA	100	94.723	NA	NA	NA	NA	NA	NA	NA	NA
chr1:172522399-172522510/+	NA	NA	NA	NA	NA	NA	82.114	53.103	NA	NA	NA	NA	NA	NA	NA	NA	NA	NA	NA	NA	NA	NA	NA	NA	NA	NA	NA	NA	100	74.576
chr1:172554997-172555088/+	NA	NA	NA	NA	NA	NA	NA	NA	100	89.809	NA	NA	NA	NA	NA	NA	NA	NA	100	96.543	NA	NA	NA	NA	NA	NA	NA	NA	NA	NA
chr1:173743443-173743577/+	NA	NA	NA	NA	NA	NA	96.581	87.879	NA	NA	NA	NA	NA	NA	NA	NA	NA	NA	NA	NA	NA	NA	NA	NA	NA	NA	NA	NA	NA	NA
chr1:1737913-1737977/-	NA	NA	NA	NA	NA	NA	NA	NA	NA	NA	NA	NA	NA	NA	NA	NA	NA	NA	NA	NA	100	99.841	NA	NA	NA	NA	NA	NA	NA	NA
chr1:173835314-173835344/-	NA	NA	NA	NA	NA	NA	100	99.863	NA	NA	NA	NA	NA	NA	NA	NA	NA	NA	NA	NA	NA	NA	NA	NA	NA	NA	NA	NA	NA	NA
chr1:173835665-173835705/-	NA	NA	NA	NA	100	99.669	NA	NA	NA	NA	NA	NA	NA	NA	NA	NA	NA	NA	NA	NA	NA	NA	NA	NA	NA	NA	NA	NA	NA	NA
chr1:173835665-173835934/-	NA	NA	NA	NA	NA	NA	100	99.901	NA	NA	NA	NA	NA	NA	NA	NA	NA	NA	NA	NA	NA	NA	NA	NA	NA	NA	NA	NA	NA	NA
chr1:173835898-173835934/-	NA	NA	NA	NA	NA	NA	99.851	99.649	NA	NA	NA	NA	NA	NA	NA	NA	NA	NA	NA	NA	NA	NA	NA	NA	NA	NA	NA	NA	NA	NA
chr1:174242714-174242799/+	NA	NA	NA	NA	NA	NA	5.376	0	NA	NA	NA	NA	NA	NA	NA	NA	NA	NA	NA	NA	NA	NA	NA	NA	NA	NA	NA	NA	NA	NA
chr1:174244617-174244719/+	NA	NA	NA	NA	NA	NA	40	11.268	NA	NA	NA	NA	NA	NA	NA	NA	NA	NA	NA	NA	NA	NA	NA	NA	NA	NA	NA	NA	NA	NA
chr1:1747194-1747301/-	100	99.238	NA	NA	NA	NA	100	99.532	NA	NA	NA	NA	NA	NA	100	98.984	NA	NA	NA	NA	99.648	99.331	NA	NA	NA	NA	NA	NA	NA	NA
chr1:1749275-1749314/-	99.022	97.926	NA	NA	NA	NA	NA	NA	NA	NA	NA	NA	NA	NA	99.081	98.009	NA	NA	NA	NA	99.282	98.017	NA	NA	NA	NA	NA	NA	NA	NA
chr1:1752563-1752754/-	0.531	0	NA	NA	NA	NA	NA	NA	NA	NA	NA	NA	NA	NA	NA	NA	0.607	0.14	NA	NA	NA	NA	NA	NA	NA	NA	NA	NA	NA	NA
chr1:176069380-176069497/-	6.407	0	3.918	1.556	NA	NA	NA	NA	NA	NA	11.364	4.021	NA	NA	NA	NA	NA	NA	NA	NA	NA	NA	NA	NA	NA	NA	NA	NA	NA	NA
chr1:176085759-176085817/-	100	97.17	NA	NA	NA	NA	NA	NA	NA	NA	NA	NA	NA	NA	NA	NA	NA	NA	NA	NA	NA	NA	NA	NA	NA	NA	NA	NA	NA	NA
chr1:176102982-176103036/-	NA	NA	4.886	0.469	NA	NA	5.389	2.198	NA	NA	5	0.565	NA	NA	NA	NA	NA	NA	NA	NA	NA	NA	NA	NA	NA	NA	NA	NA	NA	NA
chr1:176104145-176104222/-	NA	NA	89.641	80.522	NA	NA	NA	NA	NA	NA	NA	NA	NA	NA	NA	NA	NA	NA	NA	NA	NA	NA	NA	NA	NA	NA	NA	NA	100	93.962
chr1:176105623-176105683/-	NA	NA	33.333	14.644	NA	NA	NA	NA	100	40.426	NA	NA	NA	NA	NA	NA	NA	NA	NA	NA	NA	NA	NA	NA	NA	NA	NA	NA	91.011	75.709
chr1:176113140-176113236/-	NA	NA	NA	NA	NA	NA	9.87	2.674	NA	NA	NA	NA	NA	NA	NA	NA	NA	NA	NA	NA	NA	NA	NA	NA	NA	NA	NA	NA	NA	NA
chr1:176118141-176118210/-	NA	NA	NA	NA	NA	NA	95.222	90.38	NA	NA	NA	NA	NA	NA	NA	NA	NA	NA	NA	NA	NA	NA	NA	NA	NA	NA	NA	NA	NA	NA
chr1:176132004-176132124/-	NA	NA	NA	NA	NA	NA	NA	NA	NA	NA	NA	NA	NA	NA	NA	NA	NA	NA	NA	NA	NA	NA	NA	NA	NA	NA	NA	NA	95.276	85.532
chr1:176145045-176145143/-	NA	NA	NA	NA	NA	NA	NA	NA	NA	NA	NA	NA	NA	NA	97.425	92.905	NA	NA	NA	NA	NA	NA	NA	NA	NA	NA	NA	NA	100	84.541
chr1:1763670-1763921/-	NA	NA	NA	NA	NA	NA	NA	NA	NA	NA	NA	NA	NA	NA	NA	NA	NA	NA	NA	NA	NA	NA	NA	NA	NA	NA	NA	NA	8.197	0.447
chr1:178861364-178861442/+	50.877	28	NA	NA	NA	NA	NA	NA	NA	NA	NA	NA	NA	NA	NA	NA	NA	NA	NA	NA	NA	NA	NA	NA	NA	NA	NA	NA	NA	NA
chr1:179079709-179079980/-	NA	NA	NA	NA	NA	NA	NA	NA	NA	NA	NA	NA	NA	NA	NA	NA	NA	NA	NA	NA	12.624	0	NA	NA	NA	NA	NA	NA	NA	NA
chr1:179314081-179314211/+	100	97.764	NA	NA	NA	NA	NA	NA	99.82	95.395	NA	NA	100	97.791	NA	NA	NA	NA	NA	NA	NA	NA	NA	NA	NA	NA	NA	NA	NA	NA
chr1:179319430-179319566/+	NA	NA	100	99.763	NA	NA	NA	NA	NA	NA	NA	NA	NA	NA	NA	NA	NA	NA	NA	NA	NA	NA	NA	NA	NA	NA	NA	NA	NA	NA
chr1:17975048-17975170/+	NA	NA	NA	NA	NA	NA	NA	NA	95.633	86.938	NA	NA	NA	NA	NA	NA	NA	NA	NA	NA	NA	NA	NA	NA	NA	NA	NA	NA	NA	NA
chr1:180793888-180794079/+	100	97.26	NA	NA	NA	NA	NA	NA	NA	NA	NA	NA	NA	NA	NA	NA	100	96.552	NA	NA	NA	NA	NA	NA	NA	NA	NA	NA	NA	NA
chr1:180805657-180805852/+	NA	NA	NA	NA	NA	NA	NA	NA	NA	NA	98.298	92.121	NA	NA	NA	NA	NA	NA	NA	NA	NA	NA	NA	NA	NA	NA	NA	NA	NA	NA
chr1:180971741-180971836/-	NA	NA	NA	NA	100	83.696	NA	NA	NA	NA	100	89.591	NA	NA	NA	NA	NA	NA	NA	NA	NA	NA	NA	NA	NA	NA	NA	NA	NA	NA
chr1:182359631-182359987/-	NA	NA	NA	NA	NA	NA	NA	NA	NA	NA	NA	NA	NA	NA	100	1.651	NA	NA	NA	NA	NA	NA	NA	NA	NA	NA	NA	NA	NA	NA
chr1:182824711-182824848/+	NA	NA	27.341	16.591	NA	NA	23.218	17.91	NA	NA	NA	NA	NA	NA	NA	NA	NA	NA	NA	NA	NA	NA	NA	NA	NA	NA	NA	NA	NA	NA
chr1:183516237-183516387/+	NA	NA	13.07	6.222	NA	NA	NA	NA	NA	NA	NA	NA	NA	NA	NA	NA	NA	NA	NA	NA	NA	NA	NA	NA	NA	NA	NA	NA	NA	NA
chr1:183775508-183775619/+	NA	NA	NA	NA	NA	NA	NA	NA	NA	NA	NA	NA	NA	NA	NA	NA	NA	NA	100	70.968	NA	NA	NA	NA	NA	NA	NA	NA	NA	NA
chr1:184859241-184859356/-	NA	NA	NA	NA	NA	NA	NA	NA	NA	NA	NA	NA	NA	NA	NA	NA	NA	NA	100	84.674	NA	NA	NA	NA	NA	NA	NA	NA	NA	NA
chr1:186880379-186880521/+	98.384	95.39	NA	NA	NA	NA	NA	NA	NA	NA	NA	NA	NA	NA	NA	NA	NA	NA	NA	NA	NA	NA	NA	NA	NA	NA	NA	NA	NA	NA
chr1:19202808-19202961/-	NA	NA	90.363	62.712	NA	NA	NA	NA	NA	NA	NA	NA	NA	NA	NA	NA	NA	NA	NA	NA	NA	NA	NA	NA	NA	NA	NA	NA	NA	NA
chr1:19244855-19244996/-	97.97	91.111	NA	NA	NA	NA	NA	NA	NA	NA	NA	NA	NA	NA	NA	NA	NA	NA	NA	NA	NA	NA	NA	NA	NA	NA	NA	NA	NA	NA
chr1:192997004-192997085/-	NA	NA	NA	NA	NA	NA	7.661	0	NA	NA	NA	NA	NA	NA	NA	NA	NA	NA	NA	NA	NA	NA	NA	NA	NA	NA	NA	NA	NA	NA
chr1:19633807-19633904/-	NA	NA	NA	NA	NA	NA	NA	NA	NA	NA	100	98.728	NA	NA	NA	NA	NA	NA	NA	NA	NA	NA	NA	NA	NA	NA	NA	NA	NA	NA
chr1:197564337-197564463/-	NA	NA	100	86.667	NA	NA	NA	NA	NA	NA	NA	NA	NA	NA	NA	NA	NA	NA	NA	NA	NA	NA	NA	NA	NA	NA	NA	NA	NA	NA
chr1:197581060-197581106/-	NA	NA	96.765	81.022	NA	NA	NA	NA	NA	NA	NA	NA	NA	NA	NA	NA	NA	NA	NA	NA	NA	NA	NA	NA	NA	NA	NA	NA	NA	NA
chr1:197627429-197627499/-	NA	NA	NA	NA	NA	NA	NA	NA	NA	NA	NA	NA	NA	NA	NA	NA	NA	NA	98.058	86.928	NA	NA	NA	NA	NA	NA	NA	NA	NA	NA
chr1:197704715-197704926/-	NA	NA	NA	NA	NA	NA	NA	NA	NA	NA	12.245	0	NA	NA	NA	NA	NA	NA	NA	NA	NA	NA	NA	NA	NA	NA	NA	NA	NA	NA
chr1:1987922-1988012/+	NA	NA	NA	NA	NA	NA	NA	NA	NA	NA	NA	NA	NA	NA	100	96.509	NA	NA	NA	NA	NA	NA	NA	NA	NA	NA	NA	NA	NA	NA
chr1:20072024-20072144/-	NA	NA	NA	NA	NA	NA	NA	NA	NA	NA	93.007	57.616	NA	NA	NA	NA	NA	NA	NA	NA	NA	NA	NA	NA	NA	NA	NA	NA	NA	NA
chr1:201781592-201781789/+	NA	NA	NA	NA	100	97.033	NA	NA	NA	NA	NA	NA	NA	NA	NA	NA	NA	NA	NA	NA	NA	NA	NA	NA	NA	NA	NA	NA	NA	NA
chr1:201832575-201832735/+	NA	NA	NA	NA	NA	NA	100	99.083	NA	NA	NA	NA	NA	NA	NA	NA	NA	NA	NA	NA	NA	NA	NA	NA	NA	NA	NA	NA	NA	NA
chr1:201958510-201958659/+	98.922	96.072	NA	NA	NA	NA	NA	NA	NA	NA	NA	NA	NA	NA	NA	NA	NA	NA	NA	NA	NA	NA	NA	NA	NA	NA	NA	NA	NA	NA
chr1:201966446-201966682/+	100	98.481	NA	NA	NA	NA	NA	NA	NA	NA	NA	NA	NA	NA	NA	NA	NA	NA	NA	NA	NA	NA	NA	NA	NA	NA	NA	NA	NA	NA
chr1:202412214-202412255/+	48.649	22.857	56.65	32.727	NA	NA	NA	NA	NA	NA	96.491	48.718	NA	NA	NA	NA	NA	NA	NA	NA	NA	NA	NA	NA	NA	NA	NA	NA	NA	NA
chr1:202414173-202414356/+	77.486	49.398	96.008	88.966	NA	NA	NA	NA	NA	NA	NA	NA	NA	NA	NA	NA	NA	NA	NA	NA	NA	NA	NA	NA	NA	NA	NA	NA	NA	NA
chr1:202743740-202743863/-	NA	NA	NA	NA	NA	NA	NA	NA	NA	NA	100	96.337	NA	NA	NA	NA	NA	NA	NA	NA	NA	NA	NA	NA	NA	NA	NA	NA	NA	NA
chr1:202986883-202987047/+	11.957	6.696	NA	NA	NA	NA	NA	NA	NA	NA	NA	NA	NA	NA	NA	NA	NA	NA	NA	NA	NA	NA	NA	NA	NA	NA	NA	NA	NA	NA
chr1:203025911-203026078/+	NA	NA	NA	NA	NA	NA	NA	NA	NA	NA	NA	NA	100	84.615	NA	NA	NA	NA	NA	NA	NA	NA	NA	NA	NA	NA	NA	NA	NA	NA
chr1:203682292-203682380/+	NA	NA	NA	NA	NA	NA	NA	NA	NA	NA	NA	NA	NA	NA	100	98.942	NA	NA	NA	NA	NA	NA	NA	NA	NA	NA	NA	NA	NA	NA
chr1:204495487-204495562/+	96.466	90.332	97.028	93.084	NA	NA	NA	NA	100	96.516	NA	NA	NA	NA	NA	NA	NA	NA	NA	NA	NA	NA	NA	NA	NA	NA	NA	NA	NA	NA
chr1:204506528-204506625/+	51.754	39.512	NA	NA	NA	NA	NA	NA	NA	NA	NA	NA	NA	NA	NA	NA	NA	NA	NA	NA	NA	NA	NA	NA	NA	NA	NA	NA	NA	NA
chr1:204506557-204506625/+	70.588	52.49	NA	NA	NA	NA	NA	NA	NA	NA	NA	NA	NA	NA	NA	NA	NA	NA	NA	NA	NA	NA	NA	NA	NA	NA	NA	NA	NA	NA
chr1:204506586-204506625/+	53.586	40.952	NA	NA	NA	NA	NA	NA	NA	NA	NA	NA	NA	NA	NA	NA	NA	NA	NA	NA	NA	NA	NA	NA	NA	NA	NA	NA	NA	NA
chr1:206778752-206778860/-	NA	NA	NA	NA	NA	NA	NA	NA	NA	NA	NA	NA	NA	NA	NA	NA	100	97.63	NA	NA	NA	NA	NA	NA	NA	NA	NA	NA	NA	NA
chr1:207497903-207497925/+	NA	NA	100	99.716	NA	NA	NA	NA	NA	NA	NA	NA	NA	NA	NA	NA	NA	NA	NA	NA	NA	NA	NA	NA	NA	NA	NA	NA	NA	NA
chr1:207498966-207499066/+	NA	NA	100	97.11	NA	NA	NA	NA	NA	NA	NA	NA	NA	NA	NA	NA	NA	NA	NA	NA	NA	NA	NA	NA	NA	NA	NA	NA	NA	NA
chr1:2076827-2076950/+	NA	NA	NA	NA	NA	NA	NA	NA	5.569	0	NA	NA	NA	NA	NA	NA	NA	NA	NA	NA	NA	NA	NA	NA	NA	NA	NA	NA	NA	NA
chr1:207940951-207940996/+	NA	NA	5.202	0.737	NA	NA	NA	NA	NA	NA	NA	NA	NA	NA	NA	NA	NA	NA	NA	NA	NA	NA	NA	NA	NA	NA	NA	NA	NA	NA
chr1:207940951-207941168/+	NA	NA	54.08	17.776	NA	NA	NA	NA	NA	NA	NA	NA	NA	NA	NA	NA	NA	NA	NA	NA	NA	NA	NA	NA	NA	NA	NA	NA	NA	NA
chr1:207941123-207941168/+	NA	NA	64.923	28.858	NA	NA	NA	NA	NA	NA	NA	NA	NA	NA	NA	NA	NA	NA	NA	NA	NA	NA	NA	NA	NA	NA	NA	NA	NA	NA
chr1:21083658-21083749/-	NA	NA	NA	NA	100	99.019	83.978	77.757	NA	NA	NA	NA	NA	NA	NA	NA	NA	NA	NA	NA	NA	NA	NA	NA	NA	NA	NA	NA	NA	NA
chr1:211444838-211445216/+	NA	NA	NA	NA	NA	NA	15.356	0	NA	NA	NA	NA	NA	NA	NA	NA	NA	NA	NA	NA	NA	NA	NA	NA	NA	NA	NA	NA	NA	NA
chr1:212148507-212148714/-	NA	NA	NA	NA	NA	NA	100	98.154	NA	NA	NA	NA	NA	NA	NA	NA	NA	NA	NA	NA	NA	NA	NA	NA	NA	NA	NA	NA	NA	NA
chr1:21219111-21219222/-	NA	NA	NA	NA	23.063	17.363	NA	NA	NA	NA	NA	NA	NA	NA	NA	NA	NA	NA	NA	NA	NA	NA	NA	NA	NA	NA	NA	NA	NA	NA
chr1:21276495-21276601/-	100	95.808	NA	NA	NA	NA	100	94.958	NA	NA	100	97.694	NA	NA	NA	NA	NA	NA	NA	NA	NA	NA	NA	NA	NA	NA	NA	NA	NA	NA
chr1:21276495-21276604/-	100	95.679	NA	NA	NA	NA	NA	NA	NA	NA	100	97.694	NA	NA	NA	NA	NA	NA	NA	NA	NA	NA	NA	NA	NA	NA	NA	NA	NA	NA
chr1:213037734-213037861/+	47.556	6.011	29.377	5.983	61.165	34.375	NA	NA	NA	NA	NA	NA	29.801	8.287	NA	NA	28.571	9.778	100	15.789	NA	NA	NA	NA	NA	NA	82.353	14.932	NA	NA
chr1:213046019-213046160/+	NA	NA	NA	NA	NA	NA	NA	NA	NA	NA	NA	NA	NA	NA	NA	NA	100	94.355	NA	NA	NA	NA	NA	NA	NA	NA	NA	NA	NA	NA
chr1:213061232-213061343/+	NA	NA	NA	NA	NA	NA	NA	NA	94.737	68.182	NA	NA	100	77.528	NA	NA	NA	NA	NA	NA	NA	NA	NA	NA	NA	NA	NA	NA	NA	NA
chr1:21307540-21307711/-	NA	NA	95.09	83.333	NA	NA	NA	NA	NA	NA	NA	NA	NA	NA	NA	NA	NA	NA	NA	NA	NA	NA	NA	NA	NA	NA	NA	NA	NA	NA
chr1:21307540-21307720/-	NA	NA	96.956	93.246	98.98	96.822	NA	NA	NA	NA	NA	NA	NA	NA	NA	NA	NA	NA	NA	NA	NA	NA	NA	NA	NA	NA	NA	NA	NA	NA
chr1:21324093-21324126/-	NA	NA	3.923	0	NA	NA	NA	NA	NA	NA	NA	NA	NA	NA	7.471	3.053	NA	NA	10.204	4.145	NA	NA	NA	NA	NA	NA	NA	NA	NA	NA
chr1:21327691-21327805/-	11.408	7.17	NA	NA	15.688	10.308	NA	NA	NA	NA	11.286	7.042	NA	NA	12.997	5.846	NA	NA	NA	NA	NA	NA	NA	NA	NA	NA	NA	NA	NA	NA
chr1:21327728-21327817/-	NA	NA	1.288	0	NA	NA	NA	NA	NA	NA	NA	NA	NA	NA	NA	NA	NA	NA	NA	NA	NA	NA	NA	NA	NA	NA	NA	NA	NA	NA
chr1:21329205-21329301/-	NA	NA	NA	NA	NA	NA	NA	NA	NA	NA	NA	NA	NA	NA	NA	NA	NA	NA	96.743	92.665	NA	NA	NA	NA	NA	NA	NA	NA	NA	NA
chr1:213302869-213303232/+	NA	NA	NA	NA	94.432	88.482	NA	NA	NA	NA	NA	NA	NA	NA	NA	NA	NA	NA	NA	NA	NA	NA	NA	NA	NA	NA	NA	NA	NA	NA
chr1:21377358-21377487/-	NA	NA	NA	NA	NA	NA	NA	NA	NA	NA	100	98.717	NA	NA	NA	NA	NA	NA	NA	NA	NA	NA	NA	NA	NA	NA	NA	NA	NA	NA
chr1:21605683-21605825/-	NA	NA	NA	NA	NA	NA	NA	NA	NA	NA	NA	NA	NA	NA	NA	NA	NA	NA	NA	NA	100	99.75	NA	NA	NA	NA	NA	NA	NA	NA
chr1:217668356-217668417/-	NA	NA	NA	NA	NA	NA	NA	NA	NA	NA	NA	NA	NA	NA	NA	NA	NA	NA	NA	NA	NA	NA	NA	NA	NA	NA	NA	NA	91.667	0
chr1:22050390-22050588/-	NA	NA	NA	NA	NA	NA	NA	NA	NA	NA	NA	NA	100	95.728	NA	NA	NA	NA	100	92.131	100	95.238	NA	NA	NA	NA	NA	NA	NA	NA
chr1:22206855-22207052/-	NA	NA	NA	NA	NA	NA	NA	NA	NA	NA	NA	NA	NA	NA	NA	NA	NA	NA	NA	NA	99.905	99.508	NA	NA	NA	NA	NA	NA	NA	NA
chr1:22405198-22405374/+	NA	NA	NA	NA	NA	NA	0.576	0.147	NA	NA	NA	NA	NA	NA	NA	NA	NA	NA	NA	NA	NA	NA	NA	NA	NA	NA	NA	NA	NA	NA
chr1:22405239-22405374/+	NA	NA	NA	NA	NA	NA	0.48	0	NA	NA	NA	NA	NA	NA	NA	NA	NA	NA	NA	NA	NA	NA	NA	NA	NA	NA	NA	NA	NA	NA
chr1:22408214-22408287/+	100	99.045	100	99.234	NA	NA	99.66	98.179	NA	NA	NA	NA	100	98.539	NA	NA	NA	NA	NA	NA	NA	NA	NA	NA	NA	NA	NA	NA	NA	NA
chr1:224489392-224489473/-	NA	NA	20.123	3.495	NA	NA	NA	NA	NA	NA	36	20.197	27.473	14.286	NA	NA	NA	NA	NA	NA	NA	NA	NA	NA	NA	NA	NA	NA	NA	NA
chr1:224500751-224500857/-	41.176	0	NA	NA	NA	NA	NA	NA	NA	NA	NA	NA	NA	NA	NA	NA	NA	NA	NA	NA	NA	NA	NA	NA	NA	NA	NA	NA	NA	NA
chr1:224600954-224601037/-	NA	NA	NA	NA	2.286	0	NA	NA	NA	NA	NA	NA	NA	NA	NA	NA	NA	NA	NA	NA	NA	NA	NA	NA	NA	NA	NA	NA	NA	NA
chr1:224872497-224872545/+	NA	NA	NA	NA	NA	NA	NA	NA	NA	NA	NA	NA	NA	NA	NA	NA	NA	NA	NA	NA	NA	NA	NA	NA	NA	NA	NA	NA	100	71.642
chr1:224918163-224918276/+	NA	NA	NA	NA	NA	NA	NA	NA	NA	NA	NA	NA	NA	NA	NA	NA	NA	NA	NA	NA	NA	NA	NA	NA	NA	NA	NA	NA	100	88.333
chr1:225147854-225148004/+	NA	NA	NA	NA	NA	NA	100	95.294	NA	NA	NA	NA	NA	NA	NA	NA	NA	NA	NA	NA	NA	NA	NA	NA	NA	NA	NA	NA	NA	NA
chr1:225237911-225238078/+	NA	NA	NA	NA	NA	NA	100	65.714	NA	NA	NA	NA	NA	NA	NA	NA	NA	NA	NA	NA	NA	NA	NA	NA	NA	NA	NA	NA	NA	NA
chr1:225704897-225705008/-	NA	NA	NA	NA	NA	NA	NA	NA	NA	NA	92.809	80.108	NA	NA	NA	NA	NA	NA	NA	NA	NA	NA	NA	NA	NA	NA	NA	NA	NA	NA
chr1:225704897-225705692/-	NA	NA	NA	NA	NA	NA	NA	NA	NA	NA	87.687	71.206	NA	NA	NA	NA	NA	NA	NA	NA	NA	NA	NA	NA	NA	NA	NA	NA	NA	NA
chr1:226054273-226054382/-	NA	NA	NA	NA	NA	NA	100	89.313	NA	NA	NA	NA	NA	NA	NA	NA	NA	NA	NA	NA	NA	NA	NA	NA	NA	NA	NA	NA	NA	NA
chr1:226455657-226455791/-	NA	NA	NA	NA	NA	NA	100	97.698	NA	NA	NA	NA	NA	NA	NA	NA	NA	NA	NA	NA	NA	NA	NA	NA	NA	NA	NA	NA	NA	NA
chr1:226483542-226483647/-	NA	NA	NA	NA	NA	NA	64.626	46.429	NA	NA	NA	NA	NA	NA	NA	NA	NA	NA	NA	NA	NA	NA	NA	NA	NA	NA	NA	NA	NA	NA
chr1:226483542-226485514/-	NA	NA	NA	NA	NA	NA	100	85.787	NA	NA	NA	NA	NA	NA	NA	NA	NA	NA	NA	NA	NA	NA	NA	NA	NA	NA	NA	NA	NA	NA
chr1:226485419-226485514/-	NA	NA	NA	NA	NA	NA	97.059	86.822	NA	NA	NA	NA	NA	NA	NA	NA	NA	NA	NA	NA	NA	NA	NA	NA	NA	NA	NA	NA	NA	NA
chr1:227192694-227192812/-	100	93.706	NA	NA	NA	NA	NA	NA	NA	NA	NA	NA	NA	NA	NA	NA	NA	NA	NA	NA	NA	NA	NA	NA	NA	NA	NA	NA	NA	NA
chr1:227216357-227216437/-	NA	NA	NA	NA	NA	NA	100	94.304	NA	NA	NA	NA	NA	NA	NA	NA	NA	NA	NA	NA	NA	NA	NA	NA	NA	NA	NA	NA	NA	NA
chr1:227239581-227239686/-	NA	NA	NA	NA	33.462	19.259	NA	NA	NA	NA	NA	NA	NA	NA	NA	NA	NA	NA	33.649	19.685	NA	NA	NA	NA	NA	NA	NA	NA	NA	NA
chr1:227256354-227256402/-	NA	NA	NA	NA	NA	NA	3.704	1.266	NA	NA	NA	NA	NA	NA	NA	NA	NA	NA	NA	NA	NA	NA	NA	NA	NA	NA	NA	NA	NA	NA
chr1:227300371-227300614/-	NA	NA	NA	NA	NA	NA	NA	NA	NA	NA	100	81.081	NA	NA	NA	NA	NA	NA	NA	NA	NA	NA	NA	NA	NA	NA	NA	NA	NA	NA
chr1:227406963-227407121/-	NA	NA	NA	NA	56.19	0	NA	NA	NA	NA	NA	NA	NA	NA	NA	NA	NA	NA	NA	NA	NA	NA	NA	NA	NA	NA	NA	NA	NA	NA
chr1:230807004-230807150/+	NA	NA	NA	NA	NA	NA	NA	NA	NA	NA	11.31	1.408	NA	NA	NA	NA	NA	NA	NA	NA	NA	NA	NA	NA	NA	NA	NA	NA	NA	NA
chr1:231075131-231075242/-	95.152	78.495	96.721	83.966	100	80.882	NA	NA	NA	NA	NA	NA	NA	NA	NA	NA	NA	NA	NA	NA	NA	NA	NA	NA	NA	NA	NA	NA	NA	NA
chr1:231081134-231081200/-	NA	NA	NA	NA	63.713	49.068	97.156	87.5	NA	NA	NA	NA	NA	NA	NA	NA	NA	NA	NA	NA	NA	NA	NA	NA	NA	NA	NA	NA	NA	NA
chr1:231092166-231092228/-	32.407	0.667	17.677	0	18.436	0	16.245	0	22.148	0	NA	NA	NA	NA	8.148	0	30.579	0	26.667	0	NA	NA	NA	NA	NA	NA	NA	NA	46.341	0
chr1:231092166-231092306/-	21.925	0.997	13.757	0	13.353	0	9.02	0	NA	NA	NA	NA	NA	NA	NA	NA	22.222	0	NA	NA	NA	NA	NA	NA	NA	NA	NA	NA	NA	NA
chr1:232669235-232669329/-	NA	NA	NA	NA	NA	NA	NA	NA	NA	NA	NA	NA	NA	NA	NA	NA	NA	NA	NA	NA	NA	NA	NA	NA	NA	NA	NA	NA	64.286	32.432
chr1:2330853-2330953/+	NA	NA	NA	NA	NA	NA	100	99.335	NA	NA	NA	NA	NA	NA	NA	NA	NA	NA	NA	NA	NA	NA	NA	NA	NA	NA	NA	NA	NA	NA
chr1:233160891-233161145/-	NA	NA	NA	NA	NA	NA	NA	NA	NA	NA	NA	NA	NA	NA	100	89.677	NA	NA	NA	NA	NA	NA	NA	NA	NA	NA	NA	NA	NA	NA
chr1:233225806-233225936/-	NA	NA	NA	NA	NA	NA	NA	NA	NA	NA	NA	NA	NA	NA	100	82.979	NA	NA	NA	NA	NA	NA	NA	NA	NA	NA	NA	NA	NA	NA
chr1:233231500-233231609/-	98.625	89.888	NA	NA	NA	NA	NA	NA	NA	NA	NA	NA	NA	NA	100	91.617	NA	NA	NA	NA	NA	NA	NA	NA	NA	NA	NA	NA	NA	NA
chr1:233372001-233372065/-	NA	NA	NA	NA	NA	NA	NA	NA	NA	NA	NA	NA	NA	NA	NA	NA	NA	NA	NA	NA	NA	NA	NA	NA	NA	NA	17.5	0	15.152	0
chr1:233397790-233397911/-	NA	NA	NA	NA	NA	NA	NA	NA	NA	NA	NA	NA	NA	NA	NA	NA	86.822	70	NA	NA	NA	NA	NA	NA	NA	NA	NA	NA	NA	NA
chr1:23366751-23366927/+	NA	NA	NA	NA	NA	NA	2.817	0	NA	NA	NA	NA	NA	NA	NA	NA	NA	NA	NA	NA	NA	NA	NA	NA	NA	NA	NA	NA	7.317	0.305
chr1:23370919-23370979/+	NA	NA	NA	NA	61.526	48.792	NA	NA	60.563	44.321	81.058	57.143	NA	NA	69.072	49.091	NA	NA	65.517	53.291	NA	NA	NA	NA	NA	NA	NA	NA	53.571	35.463
chr1:234534127-234534299/-	NA	NA	NA	NA	NA	NA	NA	NA	NA	NA	NA	NA	NA	NA	NA	NA	100	76.615	NA	NA	NA	NA	NA	NA	NA	NA	NA	NA	NA	NA
chr1:234569155-234569317/-	NA	NA	NA	NA	NA	NA	NA	NA	NA	NA	NA	NA	100	93.735	NA	NA	NA	NA	NA	NA	NA	NA	NA	NA	NA	NA	NA	NA	NA	NA
chr1:234593412-234593502/-	NA	NA	NA	NA	NA	NA	100	97.988	NA	NA	NA	NA	NA	NA	NA	NA	NA	NA	NA	NA	NA	NA	NA	NA	NA	NA	NA	NA	NA	NA
chr1:234599582-234599680/-	NA	NA	91.304	74.783	NA	NA	NA	NA	NA	NA	NA	NA	NA	NA	NA	NA	NA	NA	NA	NA	NA	NA	NA	NA	NA	NA	NA	NA	NA	NA
chr1:235590454-235590554/+	NA	NA	NA	NA	NA	NA	NA	NA	NA	NA	NA	NA	NA	NA	NA	NA	NA	NA	NA	NA	NA	NA	NA	NA	NA	NA	NA	NA	100	95.327
chr1:235596260-235596413/+	15.556	1.25	NA	NA	NA	NA	NA	NA	NA	NA	NA	NA	NA	NA	NA	NA	NA	NA	NA	NA	NA	NA	NA	NA	NA	NA	NA	NA	NA	NA
chr1:235596260-235596486/+	17.031	2.769	NA	NA	58.621	26.257	NA	NA	NA	NA	NA	NA	20.635	4.433	NA	NA	NA	NA	19.444	5.584	NA	NA	NA	NA	NA	NA	NA	NA	NA	NA
chr1:235634163-235634274/-	NA	NA	NA	NA	NA	NA	100	93.365	NA	NA	NA	NA	NA	NA	NA	NA	NA	NA	NA	NA	NA	NA	NA	NA	NA	NA	NA	NA	NA	NA
chr1:235643369-235643465/-	NA	NA	NA	NA	NA	NA	100	96.743	NA	NA	NA	NA	NA	NA	NA	NA	NA	NA	NA	NA	NA	NA	NA	NA	NA	NA	NA	NA	NA	NA
chr1:235643417-235643465/-	NA	NA	98.992	0	NA	NA	NA	NA	NA	NA	NA	NA	NA	NA	NA	NA	NA	NA	NA	NA	NA	NA	NA	NA	NA	NA	NA	NA	NA	NA
chr1:235652472-235652573/-	NA	NA	95.547	89.549	NA	NA	87.768	74.922	NA	NA	NA	NA	98.122	92.638	NA	NA	NA	NA	NA	NA	NA	NA	NA	NA	NA	NA	NA	NA	NA	NA
chr1:235652472-235652657/-	NA	NA	92.523	82.745	NA	NA	NA	NA	NA	NA	NA	NA	NA	NA	NA	NA	NA	NA	NA	NA	NA	NA	NA	NA	NA	NA	NA	NA	NA	NA
chr1:236176710-236176860/-	NA	NA	NA	NA	NA	NA	NA	NA	NA	NA	98.191	95.757	NA	NA	NA	NA	NA	NA	NA	NA	NA	NA	NA	NA	NA	NA	NA	NA	NA	NA
chr1:236974944-236975001/+	18.797	0	12.757	1.554	NA	NA	3.881	0.457	NA	NA	NA	NA	NA	NA	NA	NA	NA	NA	NA	NA	NA	NA	NA	NA	NA	NA	NA	NA	NA	NA
chr1:237024424-237024577/+	NA	NA	NA	NA	NA	NA	NA	NA	NA	NA	NA	NA	NA	NA	100	87.156	NA	NA	NA	NA	NA	NA	NA	NA	NA	NA	NA	NA	NA	NA
chr1:237037072-237037140/+	NA	NA	NA	NA	NA	NA	NA	NA	NA	NA	NA	NA	NA	NA	100	92.337	NA	NA	NA	NA	NA	NA	NA	NA	NA	NA	NA	NA	NA	NA
chr1:237038025-237038146/+	NA	NA	NA	NA	NA	NA	NA	NA	NA	NA	NA	NA	NA	NA	100	92.806	NA	NA	NA	NA	NA	NA	NA	NA	NA	NA	NA	NA	NA	NA
chr1:243349080-243349374/-	NA	NA	79.832	61.943	NA	NA	NA	NA	NA	NA	NA	NA	NA	NA	NA	NA	NA	NA	NA	NA	NA	NA	NA	NA	NA	NA	NA	NA	NA	NA
chr1:243437844-243437958/+	NA	NA	NA	NA	100	93.631	NA	NA	NA	NA	NA	NA	NA	NA	NA	NA	NA	NA	NA	NA	NA	NA	NA	NA	NA	NA	NA	NA	NA	NA
chr1:243456392-243456521/+	NA	NA	NA	NA	NA	NA	NA	NA	NA	NA	NA	NA	NA	NA	NA	NA	NA	NA	NA	NA	NA	NA	NA	NA	100	64.706	NA	NA	NA	NA
chr1:243716030-243716245/-	100	97.05	NA	NA	NA	NA	NA	NA	NA	NA	NA	NA	NA	NA	NA	NA	NA	NA	NA	NA	NA	NA	NA	NA	NA	NA	NA	NA	NA	NA
chr1:243727586-243727689/-	NA	NA	NA	NA	2.475	0.386	NA	NA	NA	NA	NA	NA	NA	NA	NA	NA	NA	NA	NA	NA	NA	NA	NA	NA	NA	NA	NA	NA	15.464	1.01
chr1:244595253-244595366/-	NA	NA	NA	NA	NA	NA	4.027	0	NA	NA	NA	NA	NA	NA	NA	NA	NA	NA	NA	NA	NA	NA	NA	NA	NA	NA	NA	NA	NA	NA
chr1:246078831-246078942/-	NA	NA	96.999	87.302	100	94.539	94.938	91.169	100	88.889	NA	NA	NA	NA	100	96.078	NA	NA	NA	NA	NA	NA	NA	NA	NA	NA	NA	NA	100	87.629
chr1:246091232-246091335/-	NA	NA	NA	NA	NA	NA	100	96.416	NA	NA	NA	NA	NA	NA	NA	NA	NA	NA	NA	NA	NA	NA	NA	NA	NA	NA	NA	NA	NA	NA
chr1:246092813-246092854/-	24.138	0	13.804	0	15.875	0	12.092	0.558	15.254	0	14.985	0	29.348	0.83	NA	NA	NA	NA	6.667	0	NA	NA	NA	NA	NA	NA	NA	NA	28.09	0
chr1:25669451-25669564/+	98.616	93.073	NA	NA	100	98.206	NA	NA	NA	NA	NA	NA	100	95.881	NA	NA	NA	NA	100	94.775	NA	NA	NA	NA	NA	NA	NA	NA	NA	NA
chr1:26128506-26128608/+	NA	NA	NA	NA	NA	NA	NA	NA	NA	NA	NA	NA	NA	NA	NA	NA	36.842	10.611	NA	NA	NA	NA	NA	NA	NA	NA	NA	NA	NA	NA
chr1:28119820-28119880/+	16.049	0	NA	NA	NA	NA	NA	NA	NA	NA	8.594	0	NA	NA	NA	NA	NA	NA	10.744	0	NA	NA	NA	NA	NA	NA	NA	NA	NA	NA
chr1:28324794-28324862/-	NA	NA	NA	NA	NA	NA	NA	NA	NA	NA	NA	NA	NA	NA	NA	NA	NA	NA	NA	NA	NA	NA	NA	NA	NA	NA	NA	NA	71.429	5.325
chr1:28343664-28343750/-	NA	NA	99.829	98.733	NA	NA	NA	NA	NA	NA	NA	NA	NA	NA	NA	NA	NA	NA	NA	NA	NA	NA	NA	NA	NA	NA	NA	NA	NA	NA
chr1:28368817-28369161/-	NA	NA	NA	NA	NA	NA	79.358	0	NA	NA	NA	NA	NA	NA	NA	NA	NA	NA	NA	NA	NA	NA	NA	NA	NA	NA	NA	NA	NA	NA
chr1:29315867-29315947/+	NA	NA	NA	NA	NA	NA	100	2.564	NA	NA	NA	NA	NA	NA	NA	NA	NA	NA	NA	NA	NA	NA	NA	NA	NA	NA	NA	NA	NA	NA
chr1:29319841-29320054/+	NA	NA	NA	NA	NA	NA	99.582	95.678	NA	NA	NA	NA	NA	NA	NA	NA	NA	NA	NA	NA	NA	NA	NA	NA	NA	NA	NA	NA	NA	NA
chr1:29424333-29424447/+	NA	NA	NA	NA	NA	NA	93.103	0	NA	NA	NA	NA	NA	NA	NA	NA	NA	NA	NA	NA	NA	NA	NA	NA	NA	NA	NA	NA	NA	NA
chr1:29609187-29609461/+	NA	NA	NA	NA	NA	NA	NA	NA	90.123	74.619	NA	NA	NA	NA	NA	NA	NA	NA	NA	NA	NA	NA	NA	NA	NA	NA	NA	NA	NA	NA
chr1:29609187-29610488/+	NA	NA	NA	NA	NA	NA	NA	NA	91.919	75.728	NA	NA	NA	NA	NA	NA	NA	NA	NA	NA	NA	NA	NA	NA	NA	NA	NA	NA	NA	NA
chr1:29611242-29611381/+	NA	NA	NA	NA	NA	NA	NA	NA	92.857	76.959	NA	NA	NA	NA	NA	NA	NA	NA	NA	NA	NA	NA	NA	NA	NA	NA	NA	NA	NA	NA
chr1:31414844-31414970/-	98.194	95.008	NA	NA	NA	NA	NA	NA	NA	NA	NA	NA	NA	NA	NA	NA	NA	NA	NA	NA	NA	NA	NA	NA	NA	NA	NA	NA	NA	NA
chr1:31437520-31437757/-	NA	NA	NA	NA	NA	NA	NA	NA	95.753	92.777	NA	NA	NA	NA	NA	NA	NA	NA	NA	NA	NA	NA	NA	NA	NA	NA	NA	NA	NA	NA
chr1:31439945-31440157/-	NA	NA	NA	NA	NA	NA	NA	NA	NA	NA	NA	NA	NA	NA	NA	NA	NA	NA	NA	NA	98.338	91.449	NA	NA	NA	NA	NA	NA	NA	NA
chr1:31440013-31440157/-	NA	NA	NA	NA	NA	NA	NA	NA	NA	NA	NA	NA	NA	NA	NA	NA	NA	NA	NA	NA	99.144	95.886	NA	NA	NA	NA	NA	NA	NA	NA
chr1:31452908-31453010/-	NA	NA	95.637	91.914	99.044	96.296	NA	NA	NA	NA	NA	NA	NA	NA	NA	NA	NA	NA	NA	NA	NA	NA	NA	NA	NA	NA	NA	NA	NA	NA
chr1:31452908-31453013/-	NA	NA	94.786	90.683	98.948	96.009	NA	NA	NA	NA	NA	NA	NA	NA	NA	NA	NA	NA	NA	NA	NA	NA	NA	NA	NA	NA	NA	NA	NA	NA
chr1:31452908-31453025/-	NA	NA	93.057	87.013	98.512	94.643	NA	NA	NA	NA	NA	NA	NA	NA	NA	NA	NA	NA	NA	NA	NA	NA	NA	NA	NA	NA	NA	NA	NA	NA
chr1:31455386-31455487/-	NA	NA	NA	NA	NA	NA	NA	NA	NA	NA	NA	NA	5.306	0.29	NA	NA	NA	NA	NA	NA	NA	NA	NA	NA	NA	NA	NA	NA	NA	NA
chr1:31465236-31465507/-	NA	NA	NA	NA	NA	NA	NA	NA	NA	NA	NA	NA	NA	NA	100	97.94	NA	NA	NA	NA	NA	NA	NA	NA	NA	NA	NA	NA	NA	NA
chr1:31467896-31468067/-	NA	NA	NA	NA	NA	NA	97.812	0	NA	NA	NA	NA	NA	NA	NA	NA	NA	NA	NA	NA	NA	NA	NA	NA	NA	NA	NA	NA	NA	NA
chr1:31467900-31468067/-	NA	NA	NA	NA	NA	NA	NA	NA	NA	NA	NA	NA	NA	NA	100	97.549	NA	NA	NA	NA	NA	NA	NA	NA	NA	NA	NA	NA	NA	NA
chr1:31478699-31478878/-	NA	NA	96.629	89.513	NA	NA	NA	NA	NA	NA	NA	NA	NA	NA	NA	NA	NA	NA	NA	NA	NA	NA	NA	NA	NA	NA	NA	NA	NA	NA
chr1:31528159-31528227/-	NA	NA	NA	NA	NA	NA	4.179	1.227	NA	NA	NA	NA	NA	NA	NA	NA	NA	NA	NA	NA	NA	NA	NA	NA	NA	NA	NA	NA	NA	NA
chr1:32377296-32377427/-	NA	NA	NA	NA	NA	NA	100	99.136	NA	NA	NA	NA	NA	NA	NA	NA	NA	NA	NA	NA	NA	NA	NA	NA	NA	NA	NA	NA	NA	NA
chr1:32497124-32497241/+	NA	NA	100	89.003	NA	NA	NA	NA	NA	NA	NA	NA	NA	NA	NA	NA	NA	NA	NA	NA	NA	NA	NA	NA	NA	NA	NA	NA	NA	NA
chr1:32542363-32542447/+	NA	NA	NA	NA	NA	NA	92	52.5	NA	NA	NA	NA	NA	NA	NA	NA	NA	NA	NA	NA	81.145	68.817	NA	NA	NA	NA	NA	NA	NA	NA
chr1:32542764-32542919/+	NA	NA	NA	NA	NA	NA	85.366	61.798	NA	NA	NA	NA	NA	NA	NA	NA	NA	NA	NA	NA	NA	NA	NA	NA	NA	NA	NA	NA	NA	NA
chr1:32561260-32561363/+	NA	NA	100	9.278	NA	NA	NA	NA	NA	NA	NA	NA	NA	NA	NA	NA	NA	NA	NA	NA	NA	NA	NA	NA	NA	NA	NA	NA	84.615	24.138
chr1:32689634-32689722/+	NA	NA	NA	NA	NA	NA	100	99.747	NA	NA	NA	NA	NA	NA	NA	NA	NA	NA	NA	NA	NA	NA	NA	NA	NA	NA	NA	NA	NA	NA
chr1:32691771-32691921/+	NA	NA	98.048	96	NA	NA	NA	NA	NA	NA	NA	NA	NA	NA	NA	NA	NA	NA	NA	NA	NA	NA	NA	NA	NA	NA	NA	NA	NA	NA
chr1:32692003-32692131/+	NA	NA	NA	NA	NA	NA	NA	NA	NA	NA	NA	NA	100	99.137	NA	NA	NA	NA	NA	NA	NA	NA	NA	NA	NA	NA	NA	NA	NA	NA
chr1:32793006-32793059/+	1.472	0	NA	NA	NA	NA	NA	NA	NA	NA	5.682	0.533	NA	NA	NA	NA	NA	NA	3.401	0.103	NA	NA	NA	NA	NA	NA	NA	NA	NA	NA
chr1:33099245-33099673/-	NA	NA	NA	NA	NA	NA	100	95.285	NA	NA	NA	NA	NA	NA	NA	NA	NA	NA	NA	NA	NA	NA	NA	NA	NA	NA	NA	NA	NA	NA
chr1:33099551-33099673/-	100	91.933	100	94.918	100	93.691	100	95.809	NA	NA	NA	NA	NA	NA	NA	NA	NA	NA	NA	NA	NA	NA	NA	NA	NA	NA	NA	NA	100	94.253
chr1:33099551-33099711/-	NA	NA	NA	NA	100	90.338	100	94.165	NA	NA	NA	NA	NA	NA	NA	NA	NA	NA	NA	NA	NA	NA	NA	NA	NA	NA	NA	NA	100	90.291
chr1:33745724-33746058/+	NA	NA	NA	NA	NA	NA	NA	NA	NA	NA	NA	NA	NA	NA	NA	NA	NA	NA	100	86.486	NA	NA	NA	NA	NA	NA	NA	NA	NA	NA
chr1:35484953-35485203/-	NA	NA	100	88.35	NA	NA	NA	NA	NA	NA	NA	NA	NA	NA	NA	NA	NA	NA	NA	NA	NA	NA	NA	NA	NA	NA	NA	NA	NA	NA
chr1:35824525-35825047/+	NA	NA	NA	NA	92.391	82.222	NA	NA	NA	NA	NA	NA	NA	NA	NA	NA	NA	NA	NA	NA	NA	NA	NA	NA	NA	NA	NA	NA	NA	NA
chr1:35825196-35825378/+	NA	NA	NA	NA	NA	NA	16.296	8.676	NA	NA	NA	NA	NA	NA	NA	NA	NA	NA	NA	NA	NA	NA	NA	NA	NA	NA	NA	NA	NA	NA
chr1:35827219-35827390/+	NA	NA	NA	NA	NA	NA	NA	NA	NA	NA	NA	NA	NA	NA	NA	NA	NA	NA	NA	NA	NA	NA	NA	NA	100	88.085	NA	NA	NA	NA
chr1:35873608-35873760/+	NA	NA	NA	NA	NA	NA	99.678	97.6	NA	NA	NA	NA	NA	NA	NA	NA	NA	NA	NA	NA	NA	NA	NA	NA	NA	NA	NA	NA	NA	NA
chr1:35944566-35944813/-	NA	NA	NA	NA	98.95	96.923	NA	NA	NA	NA	NA	NA	NA	NA	NA	NA	NA	NA	NA	NA	NA	NA	NA	NA	NA	NA	NA	NA	NA	NA
chr1:36298037-36298171/+	NA	NA	NA	NA	NA	NA	NA	NA	NA	NA	NA	NA	NA	NA	100	71.93	NA	NA	NA	NA	NA	NA	NA	NA	NA	NA	NA	NA	NA	NA
chr1:36358120-36358278/+	NA	NA	NA	NA	NA	NA	88.517	0	NA	NA	NA	NA	NA	NA	NA	NA	NA	NA	NA	NA	NA	NA	NA	NA	NA	NA	NA	NA	NA	NA
chr1:39794272-39802325/+	NA	NA	NA	NA	NA	NA	45.245	0	NA	NA	NA	NA	NA	NA	NA	NA	NA	NA	NA	NA	NA	NA	NA	NA	NA	NA	NA	NA	NA	NA
chr1:39812648-39812882/+	NA	NA	NA	NA	NA	NA	NA	NA	NA	NA	50.314	32.71	NA	NA	NA	NA	NA	NA	NA	NA	NA	NA	NA	NA	NA	NA	NA	NA	NA	NA
chr1:39844132-39844195/+	98.02	90	NA	NA	NA	NA	NA	NA	NA	NA	NA	NA	NA	NA	NA	NA	NA	NA	96.394	91.716	NA	NA	NA	NA	NA	NA	NA	NA	NA	NA
chr1:39893632-39893959/+	NA	NA	NA	NA	NA	NA	NA	NA	NA	NA	NA	NA	NA	NA	NA	NA	NA	NA	100	97.706	NA	NA	NA	NA	NA	NA	NA	NA	NA	NA
chr1:40030357-40030445/-	NA	NA	99.133	97.389	NA	NA	NA	NA	NA	NA	NA	NA	NA	NA	NA	NA	NA	NA	NA	NA	NA	NA	NA	NA	NA	NA	NA	NA	NA	NA
chr1:40319641-40319740/-	NA	NA	NA	NA	NA	NA	98.837	96.056	NA	NA	NA	NA	NA	NA	NA	NA	NA	NA	NA	NA	NA	NA	NA	NA	NA	NA	NA	NA	NA	NA
chr1:40872407-40872541/+	NA	NA	NA	NA	NA	NA	100	98.359	NA	NA	NA	NA	NA	NA	NA	NA	NA	NA	NA	NA	NA	NA	NA	NA	NA	NA	NA	NA	NA	NA
chr1:41232267-41232375/+	NA	NA	NA	NA	100	98.514	NA	NA	NA	NA	NA	NA	NA	NA	NA	NA	NA	NA	NA	NA	NA	NA	NA	NA	NA	NA	NA	NA	NA	NA
chr1:41232273-41232375/+	NA	NA	NA	NA	100	96.753	NA	NA	NA	NA	NA	NA	NA	NA	NA	NA	NA	NA	NA	NA	NA	NA	NA	NA	NA	NA	NA	NA	NA	NA
chr1:41618270-41618413/-	NA	NA	42.069	29.032	NA	NA	NA	NA	NA	NA	NA	NA	NA	NA	NA	NA	NA	NA	NA	NA	NA	NA	NA	NA	NA	NA	NA	NA	NA	NA
chr1:42671432-42671534/-	NA	NA	NA	NA	NA	NA	72.082	62.808	NA	NA	NA	NA	NA	NA	NA	NA	NA	NA	NA	NA	NA	NA	NA	NA	NA	NA	NA	NA	NA	NA
chr1:42730785-42730860/-	NA	NA	NA	NA	NA	NA	NA	NA	NA	NA	NA	NA	NA	NA	NA	NA	100	94.012	NA	NA	NA	NA	NA	NA	NA	NA	NA	NA	NA	NA
chr1:42783763-42783827/-	NA	NA	NA	NA	NA	NA	18.072	0	NA	NA	NA	NA	NA	NA	NA	NA	NA	NA	NA	NA	NA	NA	NA	NA	NA	NA	NA	NA	NA	NA
chr1:44069281-44069524/+	NA	NA	97.42	82.353	NA	NA	NA	NA	NA	NA	NA	NA	NA	NA	NA	NA	NA	NA	NA	NA	NA	NA	NA	NA	NA	NA	NA	NA	NA	NA
chr1:44069281-44069860/+	NA	NA	98.242	90.816	NA	NA	NA	NA	NA	NA	NA	NA	NA	NA	NA	NA	NA	NA	NA	NA	NA	NA	NA	NA	NA	NA	NA	NA	NA	NA
chr1:44069620-44069860/+	NA	NA	95.43	0	NA	NA	NA	NA	NA	NA	NA	NA	NA	NA	NA	NA	NA	NA	NA	NA	NA	NA	NA	NA	NA	NA	NA	NA	NA	NA
chr1:44363906-44363970/+	NA	NA	NA	NA	100	95.64	NA	NA	NA	NA	NA	NA	NA	NA	NA	NA	NA	NA	NA	NA	NA	NA	NA	NA	NA	NA	NA	NA	NA	NA
chr1:44364839-44365399/+	NA	NA	NA	NA	100	94.425	NA	NA	NA	NA	NA	NA	NA	NA	NA	NA	NA	NA	NA	NA	NA	NA	NA	NA	NA	NA	NA	NA	NA	NA
chr1:44365180-44365399/+	NA	NA	NA	NA	100	73.723	NA	NA	NA	NA	NA	NA	NA	NA	NA	NA	NA	NA	NA	NA	NA	NA	NA	NA	NA	NA	NA	NA	NA	NA
chr1:44365212-44365399/+	NA	NA	NA	NA	100	89.831	NA	NA	NA	NA	NA	NA	NA	NA	NA	NA	NA	NA	NA	NA	NA	NA	NA	NA	NA	NA	NA	NA	NA	NA
chr1:44785299-44785416/-	100	98.643	NA	NA	NA	NA	NA	NA	NA	NA	NA	NA	NA	NA	NA	NA	NA	NA	NA	NA	NA	NA	NA	NA	NA	NA	NA	NA	NA	NA
chr1:44804716-44804988/-	NA	NA	NA	NA	100	69.143	100	64.841	NA	NA	NA	NA	NA	NA	NA	NA	68.889	56.317	NA	NA	NA	NA	NA	NA	NA	NA	92.857	71.429	100	76.623
chr1:44804716-44804994/-	NA	NA	71.313	63.71	NA	NA	NA	NA	NA	NA	79.262	69.541	92.941	57.016	NA	NA	NA	NA	NA	NA	NA	NA	NA	NA	NA	NA	NA	NA	NA	NA
chr1:45402928-45403020/-	NA	NA	NA	NA	NA	NA	0.716	0	NA	NA	NA	NA	NA	NA	NA	NA	NA	NA	NA	NA	NA	NA	NA	NA	NA	NA	NA	NA	NA	NA
chr1:46066056-46066129/+	8.784	4.455	6.315	2.315	NA	NA	NA	NA	NA	NA	NA	NA	NA	NA	NA	NA	NA	NA	NA	NA	NA	NA	NA	NA	NA	NA	NA	NA	NA	NA
chr1:46108098-46108171/-	NA	NA	NA	NA	NA	NA	100	98.718	NA	NA	NA	NA	NA	NA	100	97.986	NA	NA	NA	NA	NA	NA	NA	NA	NA	NA	NA	NA	NA	NA
chr1:46383010-46383205/+	NA	NA	NA	NA	NA	NA	12.712	2.169	NA	NA	NA	NA	NA	NA	NA	NA	NA	NA	NA	NA	NA	NA	NA	NA	NA	NA	NA	NA	NA	NA
chr1:46660224-46660323/-	99.645	97.596	NA	NA	NA	NA	NA	NA	NA	NA	NA	NA	NA	NA	NA	NA	NA	NA	NA	NA	NA	NA	NA	NA	NA	NA	NA	NA	NA	NA
chr1:46775568-46775716/+	NA	NA	NA	NA	NA	NA	4.473	2.185	NA	NA	NA	NA	NA	NA	NA	NA	NA	NA	NA	NA	NA	NA	NA	NA	6.667	2.391	NA	NA	100	2.391
chr1:47154024-47154216/-	NA	NA	NA	NA	NA	NA	70.482	57.641	NA	NA	NA	NA	NA	NA	NA	NA	NA	NA	NA	NA	NA	NA	NA	NA	NA	NA	NA	NA	NA	NA
chr1:51218109-51218195/-	NA	NA	NA	NA	NA	NA	0.943	0	NA	NA	NA	NA	NA	NA	NA	NA	NA	NA	NA	NA	NA	NA	NA	NA	NA	NA	NA	NA	NA	NA
chr1:51246528-51246716/-	11.538	0.877	NA	NA	NA	NA	3.133	1.149	NA	NA	NA	NA	NA	NA	NA	NA	NA	NA	NA	NA	NA	NA	NA	NA	NA	NA	NA	NA	NA	NA
chr1:51320013-51320089/-	NA	NA	NA	NA	NA	NA	0.969	0	NA	NA	NA	NA	NA	NA	NA	NA	NA	NA	NA	NA	NA	NA	NA	NA	NA	NA	NA	NA	NA	NA
chr1:51320013-51320160/-	NA	NA	NA	NA	NA	NA	1.526	0	NA	NA	NA	NA	NA	NA	NA	NA	NA	NA	NA	NA	NA	NA	NA	NA	NA	NA	NA	NA	NA	NA
chr1:51866589-51866625/-	100	94.36	NA	NA	100	98.527	NA	NA	NA	NA	NA	NA	99.421	97.638	NA	NA	NA	NA	NA	NA	NA	NA	NA	NA	NA	NA	NA	NA	NA	NA
chr1:51871576-51871780/-	100	97.455	NA	NA	NA	NA	NA	NA	NA	NA	NA	NA	NA	NA	100	97.323	NA	NA	NA	NA	NA	NA	NA	NA	NA	NA	NA	NA	NA	NA
chr1:52214040-52214070/+	NA	NA	NA	NA	100	91.979	NA	NA	NA	NA	NA	NA	NA	NA	NA	NA	NA	NA	NA	NA	NA	NA	NA	NA	NA	NA	NA	NA	NA	NA
chr1:52218174-52226452/+	NA	NA	NA	NA	NA	NA	98.928	0	NA	NA	NA	NA	NA	NA	NA	NA	NA	NA	NA	NA	NA	NA	NA	NA	NA	NA	NA	NA	NA	NA
chr1:52221192-52222030/+	51.71	0	NA	NA	NA	NA	NA	NA	NA	NA	NA	NA	NA	NA	NA	NA	NA	NA	NA	NA	NA	NA	NA	NA	NA	NA	NA	NA	NA	NA
chr1:52221991-52222030/+	NA	NA	NA	NA	NA	NA	NA	NA	NA	NA	NA	NA	NA	NA	NA	NA	NA	NA	NA	NA	NA	NA	NA	NA	NA	NA	NA	NA	86.047	46.856
chr1:52285471-52285545/-	NA	NA	NA	NA	NA	NA	100	99.167	NA	NA	NA	NA	NA	NA	NA	NA	NA	NA	NA	NA	NA	NA	NA	NA	NA	NA	NA	NA	NA	NA
chr1:52290958-52291054/-	NA	NA	NA	NA	NA	NA	NA	NA	NA	NA	NA	NA	NA	NA	NA	NA	100	95.539	NA	NA	NA	NA	NA	NA	NA	NA	NA	NA	NA	NA
chr1:52303158-52303292/-	NA	NA	NA	NA	NA	NA	NA	NA	NA	NA	100	11.628	NA	NA	NA	NA	NA	NA	NA	NA	NA	NA	NA	NA	NA	NA	NA	NA	NA	NA
chr1:52860225-52860287/-	NA	NA	NA	NA	NA	NA	12.994	6.149	NA	NA	NA	NA	NA	NA	NA	NA	NA	NA	NA	NA	NA	NA	NA	NA	NA	NA	NA	NA	NA	NA
chr1:53346269-53346501/+	26.316	0	NA	NA	NA	NA	NA	NA	NA	NA	NA	NA	NA	NA	NA	NA	NA	NA	NA	NA	NA	NA	NA	NA	NA	NA	NA	NA	NA	NA
chr1:53346272-53346325/+	NA	NA	NA	NA	NA	NA	10	2.273	NA	NA	NA	NA	NA	NA	NA	NA	NA	NA	NA	NA	NA	NA	NA	NA	NA	NA	NA	NA	NA	NA
chr1:53347142-53347337/+	NA	NA	99.43	93.103	NA	NA	NA	NA	NA	NA	NA	NA	NA	NA	NA	NA	NA	NA	NA	NA	NA	NA	NA	NA	NA	NA	NA	NA	NA	NA
chr1:53699213-53699324/-	NA	NA	NA	NA	82.258	62.602	NA	NA	NA	NA	NA	NA	NA	NA	NA	NA	NA	NA	NA	NA	NA	NA	NA	NA	NA	NA	NA	NA	NA	NA
chr1:53738275-53738314/-	NA	NA	NA	NA	NA	NA	NA	NA	51.256	21.622	NA	NA	NA	NA	NA	NA	NA	NA	NA	NA	NA	NA	NA	NA	NA	NA	NA	NA	NA	NA
chr1:53738275-53741425/-	NA	NA	NA	NA	NA	NA	NA	NA	NA	NA	NA	NA	NA	NA	NA	NA	89.773	0	NA	NA	NA	NA	NA	NA	NA	NA	NA	NA	NA	NA
chr1:54254805-54254869/-	NA	NA	NA	NA	NA	NA	100	98.908	NA	NA	NA	NA	NA	NA	NA	NA	NA	NA	NA	NA	NA	NA	NA	NA	NA	NA	NA	NA	NA	NA
chr1:54262361-54262477/-	NA	NA	NA	NA	NA	NA	100	98.51	NA	NA	NA	NA	NA	NA	NA	NA	NA	NA	NA	NA	NA	NA	NA	NA	NA	NA	NA	NA	NA	NA
chr1:54273328-54273464/-	NA	NA	100	97.935	NA	NA	NA	NA	NA	NA	NA	NA	NA	NA	NA	NA	NA	NA	NA	NA	NA	NA	NA	NA	NA	NA	NA	NA	NA	NA
chr1:54332430-54332597/-	NA	NA	100	97.934	NA	NA	NA	NA	NA	NA	NA	NA	NA	NA	NA	NA	NA	NA	NA	NA	NA	NA	NA	NA	NA	NA	NA	NA	NA	NA
chr1:54511364-54511459/-	99.327	98.192	NA	NA	NA	NA	99.693	98.006	NA	NA	NA	NA	NA	NA	NA	NA	NA	NA	NA	NA	NA	NA	NA	NA	NA	NA	NA	NA	NA	NA
chr1:54512939-54513045/-	NA	NA	NA	NA	NA	NA	99.29	97.733	NA	NA	NA	NA	NA	NA	NA	NA	NA	NA	NA	NA	NA	NA	NA	NA	NA	NA	NA	NA	NA	NA
chr1:58996272-58996401/-	NA	NA	98.312	93.59	87.5	71.242	97.11	82.99	97.5	87.368	NA	NA	97.561	92.982	NA	NA	NA	NA	NA	NA	NA	NA	NA	NA	NA	NA	NA	NA	NA	NA
chr1:59154965-59155039/-	NA	NA	NA	NA	NA	NA	NA	NA	NA	NA	NA	NA	NA	NA	NA	NA	NA	NA	NA	NA	NA	NA	NA	NA	NA	NA	NA	NA	100	0
chr1:59811918-59812070/+	NA	NA	NA	NA	93.084	82.857	NA	NA	NA	NA	NA	NA	NA	NA	NA	NA	100	79.661	96.85	86.408	NA	NA	NA	NA	NA	NA	NA	NA	NA	NA
chr1:61851542-61851596/+	2.466	0	NA	NA	NA	NA	NA	NA	NA	NA	NA	NA	NA	NA	NA	NA	NA	NA	NA	NA	NA	NA	NA	NA	NA	NA	NA	NA	NA	NA
chr1:62582203-62582351/+	NA	NA	NA	NA	NA	NA	NA	NA	NA	NA	NA	NA	NA	NA	100	96.721	NA	NA	NA	NA	NA	NA	NA	NA	NA	NA	NA	NA	NA	NA
chr1:6294464-6294571/-	NA	NA	NA	NA	NA	NA	NA	NA	NA	NA	NA	NA	41.176	26.59	NA	NA	NA	NA	NA	NA	NA	NA	NA	NA	NA	NA	NA	NA	NA	NA
chr1:62993821-62993976/-	NA	NA	NA	NA	97.722	93.187	NA	NA	NA	NA	NA	NA	NA	NA	NA	NA	NA	NA	NA	NA	NA	NA	NA	NA	NA	NA	NA	NA	NA	NA
chr1:63955753-63955889/-	NA	NA	NA	NA	NA	NA	100	93.863	NA	NA	NA	NA	NA	NA	NA	NA	NA	NA	NA	NA	NA	NA	NA	NA	NA	NA	NA	NA	NA	NA
chr1:6601889-6601987/-	NA	NA	NA	NA	NA	NA	NA	NA	NA	NA	100	86	NA	NA	NA	NA	NA	NA	NA	NA	NA	NA	NA	NA	NA	NA	NA	NA	NA	NA
chr1:6609630-6609758/-	NA	NA	NA	NA	NA	NA	100	97.285	NA	NA	NA	NA	NA	NA	NA	NA	NA	NA	NA	NA	NA	NA	NA	NA	NA	NA	NA	NA	NA	NA
chr1:66729232-66729443/+	3.114	0	NA	NA	NA	NA	NA	NA	NA	NA	NA	NA	NA	NA	NA	NA	NA	NA	NA	NA	NA	NA	NA	NA	NA	NA	NA	NA	NA	NA
chr1:66731720-66731770/+	96.865	87.5	NA	NA	NA	NA	NA	NA	NA	NA	NA	NA	NA	NA	NA	NA	NA	NA	NA	NA	NA	NA	NA	NA	NA	NA	NA	NA	NA	NA
chr1:67101626-67101698/+	NA	NA	NA	NA	NA	NA	NA	NA	NA	NA	100	70.992	NA	NA	NA	NA	NA	NA	86.364	60.322	NA	NA	NA	NA	NA	NA	NA	NA	NA	NA
chr1:67147551-67148052/+	NA	NA	NA	NA	7.152	3.718	NA	NA	NA	NA	8.963	3.475	NA	NA	NA	NA	NA	NA	NA	NA	NA	NA	NA	NA	NA	NA	NA	NA	NA	NA
chr1:67147551-67149870/+	NA	NA	NA	NA	13.676	5.566	NA	NA	NA	NA	NA	NA	NA	NA	NA	NA	NA	NA	NA	NA	NA	NA	NA	NA	NA	NA	NA	NA	NA	NA
chr1:67155872-67155999/+	NA	NA	NA	NA	NA	NA	NA	NA	NA	NA	NA	NA	NA	NA	NA	NA	NA	NA	100	92.793	NA	NA	NA	NA	NA	NA	NA	NA	NA	NA
chr1:6880240-6880310/+	90.083	72.459	NA	NA	86.395	75.969	NA	NA	NA	NA	NA	NA	NA	NA	NA	NA	NA	NA	NA	NA	NA	NA	NA	NA	NA	NA	100	82.467	100	79.464
chr1:70696239-70696301/+	NA	NA	NA	NA	NA	NA	NA	NA	NA	NA	NA	NA	1.596	0.496	NA	NA	NA	NA	NA	NA	NA	NA	NA	NA	NA	NA	NA	NA	NA	NA
chr1:70696777-70696886/+	NA	NA	NA	NA	NA	NA	NA	NA	NA	NA	NA	NA	NA	NA	100	5.069	NA	NA	100	4.837	NA	NA	NA	NA	NA	NA	NA	NA	NA	NA
chr1:70740402-70740501/-	NA	NA	NA	NA	100	84	NA	NA	NA	NA	100	80.851	NA	NA	NA	NA	NA	NA	NA	NA	NA	NA	NA	NA	NA	NA	NA	NA	NA	NA
chr1:70759186-70759303/-	NA	NA	NA	NA	NA	NA	NA	NA	NA	NA	NA	NA	NA	NA	NA	NA	NA	NA	NA	NA	NA	NA	NA	NA	NA	NA	NA	NA	22.078	1.754
chr1:70771906-70771973/-	NA	NA	NA	NA	NA	NA	100	87.097	NA	NA	NA	NA	NA	NA	NA	NA	NA	NA	NA	NA	NA	NA	NA	NA	NA	NA	NA	NA	NA	NA
chr1:70883619-70883715/+	NA	NA	100	96.184	NA	NA	NA	NA	NA	NA	NA	NA	NA	NA	NA	NA	NA	NA	NA	NA	NA	NA	NA	NA	NA	NA	NA	NA	NA	NA
chr1:76254843-76255041/+	NA	NA	NA	NA	NA	NA	100	97.7	NA	NA	NA	NA	NA	NA	NA	NA	NA	NA	NA	NA	NA	NA	NA	NA	NA	NA	NA	NA	NA	NA
chr1:76255636-76255742/+	NA	NA	NA	NA	NA	NA	100	99.228	NA	NA	NA	NA	NA	NA	NA	NA	NA	NA	NA	NA	NA	NA	NA	NA	NA	NA	NA	NA	NA	NA
chr1:77634944-77635080/-	NA	NA	NA	NA	NA	NA	98.305	93.919	NA	NA	NA	NA	NA	NA	NA	NA	NA	NA	NA	NA	NA	NA	NA	NA	NA	NA	NA	NA	NA	NA
chr1:77672324-77672416/-	NA	NA	NA	NA	NA	NA	100	96.987	NA	NA	NA	NA	NA	NA	NA	NA	NA	NA	NA	NA	NA	NA	NA	NA	NA	NA	NA	NA	NA	NA
chr1:78107068-78107131/-	NA	NA	100	84.211	NA	NA	NA	NA	NA	NA	100	85.714	NA	NA	NA	NA	NA	NA	NA	NA	NA	NA	NA	NA	100	90.698	NA	NA	NA	NA
chr1:8029404-8029464/+	NA	NA	NA	NA	NA	NA	NA	NA	NA	NA	NA	NA	NA	NA	NA	NA	NA	NA	100	97.942	NA	NA	NA	NA	NA	NA	NA	NA	NA	NA
chr1:82327703-82327803/+	NA	NA	NA	NA	NA	NA	NA	NA	NA	NA	NA	NA	NA	NA	NA	NA	NA	NA	NA	NA	NA	NA	NA	NA	NA	NA	NA	NA	10.526	0
chr1:82348738-82348802/+	NA	NA	NA	NA	NA	NA	NA	NA	NA	NA	NA	NA	NA	NA	NA	NA	1.541	0	NA	NA	NA	NA	NA	NA	NA	NA	NA	NA	NA	NA
chr1:82356140-82356245/+	NA	NA	NA	NA	NA	NA	NA	NA	NA	NA	NA	NA	NA	NA	NA	NA	NA	NA	NA	NA	NA	NA	NA	NA	NA	NA	NA	NA	26.531	1.596
chr1:82446478-82446523/+	NA	NA	NA	NA	3.39	0	NA	NA	NA	NA	NA	NA	NA	NA	NA	NA	NA	NA	NA	NA	NA	NA	NA	NA	NA	NA	NA	NA	NA	NA
chr1:85406561-85406674/-	NA	NA	NA	NA	NA	NA	NA	NA	NA	NA	NA	NA	98.712	95.631	NA	NA	NA	NA	NA	NA	NA	NA	NA	NA	NA	NA	NA	NA	NA	NA
chr1:8673393-8674745/-	91.304	0	NA	NA	NA	NA	NA	NA	NA	NA	NA	NA	NA	NA	NA	NA	NA	NA	NA	NA	NA	NA	NA	NA	NA	NA	NA	NA	NA	NA
chr1:8674619-8674745/-	95.914	77.236	97.225	72.093	NA	NA	NA	NA	93.711	78.151	NA	NA	NA	NA	NA	NA	NA	NA	NA	NA	NA	NA	NA	NA	NA	NA	100	57.966	100	57.48
chr1:89250321-89250459/+	97.88	92.275	93.763	79.704	NA	NA	NA	NA	NA	NA	NA	NA	NA	NA	NA	NA	NA	NA	NA	NA	NA	NA	NA	NA	NA	NA	NA	NA	NA	NA
chr1:89250321-89250507/+	98.608	95.443	95.334	88.015	NA	NA	NA	NA	NA	NA	NA	NA	NA	NA	NA	NA	NA	NA	NA	NA	NA	NA	NA	NA	NA	NA	NA	NA	NA	NA
chr1:89270073-89270217/+	NA	NA	NA	NA	NA	NA	NA	NA	NA	NA	NA	NA	100	93.939	NA	NA	NA	NA	NA	NA	NA	NA	NA	NA	NA	NA	NA	NA	NA	NA
chr1:89271573-89271700/+	NA	NA	99.76	98.862	NA	NA	NA	NA	NA	NA	NA	NA	NA	NA	NA	NA	NA	NA	NA	NA	NA	NA	NA	NA	NA	NA	NA	NA	NA	NA
chr1:91403041-91403647/-	NA	NA	100	90.881	NA	NA	NA	NA	NA	NA	NA	NA	NA	NA	NA	NA	91.724	60.92	NA	NA	NA	NA	NA	NA	NA	NA	NA	NA	NA	NA
chr1:91403828-91406866/-	NA	NA	100	89.354	NA	NA	NA	NA	NA	NA	NA	NA	NA	NA	NA	NA	85.093	65.306	NA	NA	NA	NA	NA	NA	NA	NA	NA	NA	NA	NA
chr1:91816294-91816428/-	NA	NA	NA	NA	NA	NA	NA	NA	NA	NA	NA	NA	NA	NA	NA	NA	NA	NA	NA	NA	NA	NA	NA	NA	NA	NA	NA	NA	90	33.333
chr1:93128275-93128422/-	76.923	25.373	NA	NA	NA	NA	NA	NA	NA	NA	NA	NA	NA	NA	NA	NA	NA	NA	NA	NA	NA	NA	NA	NA	NA	NA	NA	NA	NA	NA
chr1:93128976-93129009/-	100	55.932	NA	NA	NA	NA	NA	NA	NA	NA	NA	NA	NA	NA	NA	NA	NA	NA	NA	NA	NA	NA	NA	NA	NA	NA	NA	NA	NA	NA
chr1:93169293-93169478/-	NA	NA	33.333	6.452	NA	NA	NA	NA	NA	NA	NA	NA	NA	NA	NA	NA	NA	NA	NA	NA	NA	NA	NA	NA	NA	NA	NA	NA	NA	NA
chr1:93169397-93169478/-	NA	NA	23.404	0	NA	NA	NA	NA	NA	NA	NA	NA	NA	NA	NA	NA	NA	NA	NA	NA	NA	NA	NA	NA	NA	NA	NA	NA	NA	NA
chr1:93298945-93299015/+	NA	NA	NA	NA	NA	NA	NA	NA	NA	NA	NA	NA	NA	NA	NA	NA	NA	NA	NA	NA	100	98.888	NA	NA	NA	NA	NA	NA	NA	NA
chr1:94055805-94055935/-	NA	NA	NA	NA	NA	NA	NA	NA	NA	NA	3.704	0.315	NA	NA	NA	NA	NA	NA	NA	NA	NA	NA	NA	NA	NA	NA	NA	NA	NA	NA
chr1:95367676-95367814/-	NA	NA	NA	NA	NA	NA	NA	NA	NA	NA	NA	NA	NA	NA	NA	NA	NA	NA	100	98.714	100	98.954	NA	NA	NA	NA	NA	NA	NA	NA
chr1:97271974-97272008/+	NA	NA	NA	NA	NA	NA	NA	NA	NA	NA	NA	NA	NA	NA	NA	NA	NA	NA	67.568	44.509	NA	NA	NA	NA	NA	NA	NA	NA	NA	NA
chr10:100190887-100191048/-	NA	NA	NA	NA	NA	NA	NA	NA	NA	NA	NA	NA	NA	NA	NA	NA	100	87.816	NA	NA	NA	NA	NA	NA	NA	NA	NA	NA	NA	NA
chr10:101571292-101571359/+	NA	NA	99.748	98.831	NA	NA	NA	NA	NA	NA	NA	NA	NA	NA	NA	NA	NA	NA	NA	NA	NA	NA	NA	NA	NA	NA	NA	NA	NA	NA
chr10:101595847-101596047/+	99.933	99.407	NA	NA	NA	NA	NA	NA	NA	NA	NA	NA	NA	NA	NA	NA	NA	NA	NA	NA	NA	NA	NA	NA	NA	NA	NA	NA	NA	NA
chr10:101595874-101595994/+	NA	NA	90.95	29.412	NA	NA	NA	NA	NA	NA	NA	NA	NA	NA	NA	NA	NA	NA	NA	NA	NA	NA	NA	NA	NA	NA	NA	NA	NA	NA
chr10:101601723-101601850/+	97.828	96.151	98.148	97.197	NA	NA	NA	NA	NA	NA	NA	NA	NA	NA	NA	NA	NA	NA	NA	NA	NA	NA	NA	NA	NA	NA	NA	NA	NA	NA
chr10:102016018-102016233/-	NA	NA	NA	NA	NA	NA	100	96	NA	NA	NA	NA	NA	NA	NA	NA	NA	NA	NA	NA	NA	NA	NA	NA	NA	NA	NA	NA	NA	NA
chr10:103343264-103343438/-	NA	NA	NA	NA	NA	NA	NA	NA	NA	NA	NA	NA	NA	NA	NA	NA	93.023	76.398	NA	NA	NA	NA	NA	NA	NA	NA	NA	NA	NA	NA
chr10:103345072-103345235/-	NA	NA	90.6	78.082	91.617	82.427	NA	NA	NA	NA	NA	NA	NA	NA	NA	NA	NA	NA	NA	NA	NA	NA	NA	NA	NA	NA	NA	NA	NA	NA
chr10:103427642-103427737/-	NA	NA	NA	NA	NA	NA	NA	NA	100	94.572	96.088	91.371	NA	NA	NA	NA	99.065	93.684	NA	NA	NA	NA	NA	NA	NA	NA	NA	NA	NA	NA
chr10:103553442-103553501/-	NA	NA	NA	NA	NA	NA	NA	NA	NA	NA	NA	NA	NA	NA	NA	NA	NA	NA	7.246	1.545	NA	NA	NA	NA	NA	NA	NA	NA	NA	NA
chr10:103559998-103560157/-	NA	NA	NA	NA	100	97.615	NA	NA	NA	NA	NA	NA	NA	NA	100	98.127	NA	NA	NA	NA	NA	NA	NA	NA	NA	NA	NA	NA	NA	NA
chr10:103569940-103570071/-	100	96.837	NA	NA	NA	NA	NA	NA	NA	NA	NA	NA	NA	NA	NA	NA	NA	NA	NA	NA	NA	NA	NA	NA	NA	NA	NA	NA	NA	NA
chr10:103569940-103572680/-	100	94.194	NA	NA	NA	NA	NA	NA	NA	NA	NA	NA	NA	NA	NA	NA	NA	NA	NA	NA	NA	NA	NA	NA	NA	NA	NA	NA	NA	NA
chr10:103571199-103572680/-	NA	NA	NA	NA	NA	NA	NA	NA	NA	NA	NA	NA	5.6	0	NA	NA	NA	NA	NA	NA	NA	NA	NA	NA	NA	NA	NA	NA	NA	NA
chr10:103572461-103572680/-	13.978	0	NA	NA	NA	NA	NA	NA	NA	NA	NA	NA	NA	NA	NA	NA	NA	NA	NA	NA	NA	NA	NA	NA	NA	NA	NA	NA	NA	NA
chr10:103716353-103716480/-	NA	NA	NA	NA	NA	NA	NA	NA	NA	NA	NA	NA	100	96.782	NA	NA	NA	NA	NA	NA	NA	NA	NA	NA	NA	NA	NA	NA	NA	NA
chr10:103717406-103717489/-	NA	NA	NA	NA	NA	NA	NA	NA	NA	NA	NA	NA	100	96.517	NA	NA	NA	NA	NA	NA	NA	NA	NA	NA	NA	NA	NA	NA	NA	NA
chr10:103761727-103761829/-	NA	NA	NA	NA	NA	NA	NA	NA	NA	NA	NA	NA	NA	NA	NA	NA	100	91.549	NA	NA	NA	NA	NA	NA	NA	NA	NA	NA	NA	NA
chr10:103916942-103917085/+	NA	NA	NA	NA	NA	NA	NA	NA	99.452	97.222	NA	NA	NA	NA	NA	NA	NA	NA	NA	NA	NA	NA	NA	NA	NA	NA	NA	NA	NA	NA
chr10:103916945-103917085/+	NA	NA	NA	NA	NA	NA	NA	NA	99.546	97.814	NA	NA	NA	NA	NA	NA	NA	NA	NA	NA	NA	NA	NA	NA	NA	NA	NA	NA	NA	NA
chr10:104491908-104491975/+	NA	NA	NA	NA	NA	NA	NA	NA	NA	NA	NA	NA	NA	NA	NA	NA	100	93.671	NA	NA	NA	NA	NA	NA	NA	NA	NA	NA	NA	NA
chr10:1046616-1046808/+	NA	NA	NA	NA	NA	NA	100	99.273	NA	NA	NA	NA	NA	NA	NA	NA	NA	NA	NA	NA	NA	NA	NA	NA	NA	NA	NA	NA	NA	NA
chr10:105197967-105198035/+	NA	NA	NA	NA	NA	NA	NA	NA	NA	NA	NA	NA	1.748	0	NA	NA	NA	NA	NA	NA	NA	NA	NA	NA	NA	NA	NA	NA	NA	NA
chr10:105197967-105198082/+	NA	NA	NA	NA	NA	NA	2.476	0	NA	NA	NA	NA	2.431	0	NA	NA	NA	NA	NA	NA	NA	NA	NA	NA	NA	NA	NA	NA	NA	NA
chr10:105382226-105382310/-	NA	NA	NA	NA	NA	NA	NA	NA	NA	NA	99.647	97.101	NA	NA	NA	NA	NA	NA	NA	NA	NA	NA	NA	NA	NA	NA	NA	NA	NA	NA
chr10:111876016-111876168/+	100	94.413	NA	NA	NA	NA	NA	NA	NA	NA	NA	NA	NA	NA	NA	NA	NA	NA	NA	NA	NA	NA	NA	NA	NA	NA	NA	NA	NA	NA
chr10:11308560-11308640/+	NA	NA	NA	NA	NA	NA	NA	NA	NA	NA	NA	NA	87.39	83.108	NA	NA	NA	NA	NA	NA	NA	NA	NA	NA	NA	NA	NA	NA	NA	NA
chr10:1139391-1139436/+	95.652	83.871	NA	NA	NA	NA	NA	NA	98.295	86.842	NA	NA	98.75	80.22	NA	NA	NA	NA	NA	NA	NA	NA	NA	NA	NA	NA	NA	NA	NA	NA
chr10:1142109-1142186/+	NA	NA	NA	NA	NA	NA	NA	NA	NA	NA	NA	NA	100	87.654	NA	NA	NA	NA	NA	NA	NA	NA	NA	NA	NA	NA	NA	NA	NA	NA
chr10:1149538-1149776/+	NA	NA	NA	NA	99.39	93.013	NA	NA	100	90.566	NA	NA	NA	NA	97.17	91.065	NA	NA	NA	NA	NA	NA	NA	NA	NA	NA	NA	NA	NA	NA
chr10:1149541-1149776/+	NA	NA	NA	NA	99.248	91.351	NA	NA	100	90.385	NA	NA	NA	NA	96.954	89.804	NA	NA	NA	NA	NA	NA	NA	NA	NA	NA	NA	NA	NA	NA
chr10:11606487-11607637/-	13.725	0	NA	NA	NA	NA	NA	NA	NA	NA	NA	NA	NA	NA	NA	NA	NA	NA	NA	NA	NA	NA	NA	NA	NA	NA	NA	NA	NA	NA
chr10:116233637-116233715/-	NA	NA	95.607	81.677	NA	NA	NA	NA	NA	NA	NA	NA	NA	NA	NA	NA	NA	NA	NA	NA	NA	NA	NA	NA	NA	NA	NA	NA	NA	NA
chr10:116245055-116245139/-	NA	NA	3.606	0	NA	NA	NA	NA	NA	NA	NA	NA	NA	NA	NA	NA	NA	NA	NA	NA	NA	NA	NA	NA	NA	NA	NA	NA	NA	NA
chr10:116250008-116250189/-	1.806	0	NA	NA	NA	NA	NA	NA	NA	NA	NA	NA	NA	NA	NA	NA	NA	NA	NA	NA	NA	NA	NA	NA	NA	NA	NA	NA	NA	NA
chr10:12021055-12021164/-	100	94.03	NA	NA	NA	NA	NA	NA	NA	NA	NA	NA	NA	NA	NA	NA	NA	NA	NA	NA	NA	NA	NA	NA	NA	NA	NA	NA	NA	NA
chr10:120450776-120450915/-	NA	NA	NA	NA	NA	NA	NA	NA	NA	NA	NA	NA	NA	NA	100	96.558	NA	NA	NA	NA	NA	NA	NA	NA	NA	NA	NA	NA	NA	NA
chr10:120877030-120877179/+	NA	NA	NA	NA	NA	NA	NA	NA	NA	NA	NA	NA	NA	NA	100	96.809	NA	NA	NA	NA	NA	NA	NA	NA	NA	NA	NA	NA	NA	NA
chr10:120920566-120920593/-	NA	NA	NA	NA	85.714	69.362	NA	NA	NA	NA	NA	NA	NA	NA	NA	NA	NA	NA	NA	NA	NA	NA	NA	NA	NA	NA	NA	NA	NA	NA
chr10:12129533-12129728/+	NA	NA	NA	NA	NA	NA	NA	NA	NA	NA	NA	NA	NA	NA	100	93.994	NA	NA	NA	NA	NA	NA	NA	NA	NA	NA	NA	NA	NA	NA
chr10:12130984-12131254/+	NA	NA	99.414	97.167	NA	NA	NA	NA	NA	NA	NA	NA	NA	NA	NA	NA	NA	NA	NA	NA	NA	NA	NA	NA	NA	NA	NA	NA	NA	NA
chr10:12133992-12134039/+	4.031	0	NA	NA	NA	NA	NA	NA	NA	NA	NA	NA	NA	NA	NA	NA	NA	NA	NA	NA	NA	NA	NA	NA	NA	NA	NA	NA	NA	NA
chr10:12154898-12155063/+	NA	NA	NA	NA	NA	NA	NA	NA	NA	NA	NA	NA	NA	NA	100	92.771	NA	NA	NA	NA	NA	NA	NA	NA	100	85.946	NA	NA	NA	NA
chr10:121945344-121945404/+	NA	NA	NA	NA	NA	NA	NA	NA	NA	NA	NA	NA	42.647	19.048	NA	NA	NA	NA	NA	NA	NA	NA	NA	NA	NA	NA	NA	NA	NA	NA
chr10:121945344-121945635/+	NA	NA	NA	NA	NA	NA	NA	NA	NA	NA	NA	NA	45.07	19.048	NA	NA	NA	NA	NA	NA	NA	NA	NA	NA	NA	NA	NA	NA	NA	NA
chr10:121964506-121964598/+	NA	NA	NA	NA	NA	NA	NA	NA	NA	NA	NA	NA	99.532	80.282	NA	NA	NA	NA	NA	NA	NA	NA	NA	NA	NA	NA	NA	NA	NA	NA
chr10:122278344-122280258/+	NA	NA	NA	NA	NA	NA	NA	NA	NA	NA	NA	NA	NA	NA	NA	NA	NA	NA	NA	NA	74.194	51.402	NA	NA	NA	NA	NA	NA	NA	NA
chr10:122280482-122280607/+	NA	NA	NA	NA	NA	NA	NA	NA	NA	NA	73.016	58.159	NA	NA	NA	NA	NA	NA	NA	NA	NA	NA	NA	NA	NA	NA	NA	NA	NA	NA
chr10:122280517-122280607/+	NA	NA	NA	NA	NA	NA	NA	NA	NA	NA	72.358	52.153	NA	NA	NA	NA	NA	NA	NA	NA	NA	NA	NA	NA	NA	NA	NA	NA	NA	NA
chr10:12257738-12257834/+	NA	NA	NA	NA	NA	NA	NA	NA	NA	NA	NA	NA	NA	NA	NA	NA	97.841	94.726	NA	NA	NA	NA	NA	NA	NA	NA	NA	NA	NA	NA
chr10:123324015-123324093/-	NA	NA	NA	NA	NA	NA	NA	NA	NA	NA	NA	NA	NA	NA	NA	NA	NA	NA	NA	NA	NA	NA	NA	NA	NA	NA	NA	NA	100	91.22
chr10:123658214-123658484/-	43.958	0	NA	NA	NA	NA	NA	NA	NA	NA	NA	NA	NA	NA	NA	NA	NA	NA	NA	NA	NA	NA	NA	NA	NA	NA	NA	NA	NA	NA
chr10:123658355-123658484/-	NA	NA	NA	NA	NA	NA	NA	NA	73.236	58.503	NA	NA	NA	NA	NA	NA	NA	NA	NA	NA	NA	NA	NA	NA	NA	NA	NA	NA	NA	NA
chr10:123659380-123659509/-	38.896	30.159	36.618	25.767	NA	NA	NA	NA	NA	NA	NA	NA	NA	NA	NA	NA	NA	NA	NA	NA	NA	NA	NA	NA	NA	NA	NA	NA	NA	NA
chr10:123661905-123662135/-	100	98.35	NA	NA	NA	NA	NA	NA	NA	NA	NA	NA	NA	NA	NA	NA	NA	NA	NA	NA	NA	NA	NA	NA	NA	NA	NA	NA	NA	NA
chr10:123681863-123681926/-	NA	NA	NA	NA	100	92.593	NA	NA	NA	NA	NA	NA	100	89.147	NA	NA	NA	NA	NA	NA	NA	NA	NA	NA	NA	NA	NA	NA	NA	NA
chr10:124159858-124159904/+	NA	NA	NA	NA	NA	NA	NA	NA	NA	NA	NA	NA	NA	NA	NA	NA	97.857	90.741	NA	NA	NA	NA	NA	NA	NA	NA	NA	NA	NA	NA
chr10:124166091-124166189/+	NA	NA	NA	NA	NA	NA	NA	NA	NA	NA	NA	NA	NA	NA	NA	NA	98.361	90.476	NA	NA	NA	NA	NA	NA	NA	NA	NA	NA	NA	NA
chr10:126185529-126185593/+	100	93.75	NA	NA	NA	NA	NA	NA	NA	NA	NA	NA	NA	NA	NA	NA	NA	NA	NA	NA	NA	NA	NA	NA	NA	NA	NA	NA	NA	NA
chr10:126384726-126384781/-	NA	NA	NA	NA	NA	NA	NA	NA	NA	NA	NA	NA	NA	NA	NA	NA	NA	NA	NA	NA	NA	NA	NA	NA	NA	NA	NA	NA	97.468	76
chr10:126650855-126650977/+	NA	NA	7.06	2.414	NA	NA	NA	NA	NA	NA	NA	NA	NA	NA	NA	NA	NA	NA	NA	NA	NA	NA	NA	NA	NA	NA	NA	NA	33.333	0
chr10:126763311-126763412/-	NA	NA	NA	NA	NA	NA	NA	NA	NA	NA	NA	NA	NA	NA	NA	NA	NA	NA	8.609	1.235	3.901	0	NA	NA	NA	NA	10.744	1.869	8.629	0.372
chr10:126776759-126776888/-	NA	NA	NA	NA	18.686	0.912	NA	NA	NA	NA	NA	NA	NA	NA	22.751	1.2	32.328	9.297	NA	NA	NA	NA	NA	NA	NA	NA	11.111	1.242	10.462	0
chr10:126799558-126799662/-	NA	NA	NA	NA	NA	NA	NA	NA	NA	NA	NA	NA	NA	NA	NA	NA	NA	NA	NA	NA	NA	NA	NA	NA	NA	NA	NA	NA	100	67.136
chr10:126811225-126811437/-	NA	NA	NA	NA	9.163	0	NA	NA	NA	NA	NA	NA	NA	NA	NA	NA	NA	NA	NA	NA	NA	NA	NA	NA	NA	NA	NA	NA	NA	NA
chr10:127542529-127542772/-	100	95.793	NA	NA	NA	NA	NA	NA	NA	NA	NA	NA	NA	NA	NA	NA	NA	NA	NA	NA	NA	NA	NA	NA	NA	NA	NA	NA	NA	NA
chr10:131966056-131967754/+	NA	NA	NA	NA	NA	NA	97.26	0	NA	NA	NA	NA	NA	NA	NA	NA	NA	NA	NA	NA	NA	NA	NA	NA	NA	NA	NA	NA	NA	NA
chr10:133748397-133748510/+	NA	NA	26.582	3.937	NA	NA	NA	NA	NA	NA	58.974	19.048	NA	NA	NA	NA	NA	NA	NA	NA	NA	NA	NA	NA	NA	NA	NA	NA	NA	NA
chr10:135211938-135212019/+	NA	NA	NA	NA	NA	NA	NA	NA	NA	NA	NA	NA	NA	NA	NA	NA	NA	NA	NA	NA	100	98.322	NA	NA	NA	NA	NA	NA	NA	NA
chr10:135213032-135213123/+	NA	NA	NA	NA	100	97.758	NA	NA	NA	NA	NA	NA	NA	NA	NA	NA	NA	NA	NA	NA	NA	NA	NA	NA	NA	NA	NA	NA	NA	NA
chr10:15858833-15858914/-	NA	NA	NA	NA	NA	NA	100	91.946	NA	NA	NA	NA	NA	NA	NA	NA	NA	NA	NA	NA	NA	NA	NA	NA	NA	NA	NA	NA	NA	NA
chr10:15863654-15863725/-	NA	NA	NA	NA	NA	NA	100	79.021	NA	NA	NA	NA	NA	NA	NA	NA	NA	NA	NA	NA	NA	NA	NA	NA	NA	NA	NA	NA	NA	NA
chr10:15880226-15880278/-	NA	NA	NA	NA	NA	NA	NA	NA	NA	NA	NA	NA	74.468	48.718	NA	NA	NA	NA	NA	NA	NA	NA	NA	NA	NA	NA	NA	NA	NA	NA
chr10:17421355-17421424/-	NA	NA	NA	NA	23.622	5.686	NA	NA	NA	NA	NA	NA	NA	NA	NA	NA	NA	NA	NA	NA	NA	NA	NA	NA	NA	NA	NA	NA	NA	NA
chr10:17645558-17645647/-	NA	NA	NA	NA	100	96.19	NA	NA	NA	NA	NA	NA	NA	NA	NA	NA	NA	NA	NA	NA	NA	NA	NA	NA	NA	NA	NA	NA	NA	NA
chr10:21248852-21248931/-	NA	NA	NA	NA	17.051	5.426	NA	NA	NA	NA	NA	NA	NA	NA	NA	NA	NA	NA	NA	NA	NA	NA	NA	NA	NA	NA	NA	NA	NA	NA
chr10:21962278-21962848/+	NA	NA	100	95.763	NA	NA	NA	NA	NA	NA	NA	NA	NA	NA	NA	NA	NA	NA	NA	NA	NA	NA	NA	NA	NA	NA	NA	NA	NA	NA
chr10:21962710-21962848/+	NA	NA	100	0	NA	NA	NA	NA	NA	NA	NA	NA	NA	NA	NA	NA	NA	NA	NA	NA	NA	NA	NA	NA	NA	NA	NA	NA	NA	NA
chr10:21971153-21971186/+	NA	NA	NA	NA	NA	NA	NA	NA	NA	NA	77.778	68.454	NA	NA	NA	NA	NA	NA	78.495	63.964	NA	NA	NA	NA	NA	NA	NA	NA	NA	NA
chr10:21972238-21977467/+	NA	NA	NA	NA	NA	NA	NA	NA	NA	NA	NA	NA	NA	NA	NA	NA	16.461	0	NA	NA	NA	NA	NA	NA	NA	NA	NA	NA	NA	NA
chr10:22022432-22022521/+	NA	NA	NA	NA	NA	NA	NA	NA	NA	NA	NA	NA	100	95.319	NA	NA	NA	NA	NA	NA	100	94.309	NA	NA	NA	NA	NA	NA	NA	NA
chr10:24911661-24911691/-	100	4.222	4.756	0	NA	NA	NA	NA	NA	NA	100	5.126	NA	NA	NA	NA	NA	NA	NA	NA	NA	NA	NA	NA	NA	NA	NA	NA	NA	NA
chr10:267134-267296/+	NA	NA	NA	NA	NA	NA	NA	NA	NA	NA	NA	NA	NA	NA	NA	NA	94.667	71.429	NA	NA	NA	NA	NA	NA	NA	NA	NA	NA	NA	NA
chr10:27431315-27431414/-	NA	NA	NA	NA	NA	NA	NA	NA	NA	NA	97.943	93.2	NA	NA	NA	NA	NA	NA	NA	NA	NA	NA	NA	NA	NA	NA	NA	NA	NA	NA
chr10:27469881-27469995/+	NA	NA	NA	NA	NA	NA	NA	NA	NA	NA	NA	NA	NA	NA	NA	NA	NA	NA	NA	NA	NA	NA	NA	NA	NA	NA	NA	NA	100	79.365
chr10:27820457-27820544/+	NA	NA	NA	NA	4.972	0.84	NA	NA	NA	NA	NA	NA	NA	NA	NA	NA	NA	NA	NA	NA	NA	NA	NA	NA	NA	NA	NA	NA	NA	NA
chr10:3150892-3150985/+	99.865	99.072	100	95.669	NA	NA	NA	NA	NA	NA	NA	NA	NA	NA	NA	NA	NA	NA	NA	NA	NA	NA	NA	NA	NA	NA	NA	NA	NA	NA
chr10:31647073-31647262/+	NA	NA	NA	NA	NA	NA	NA	NA	NA	NA	NA	NA	NA	NA	NA	NA	NA	NA	50.943	3.03	NA	NA	NA	NA	NA	NA	NA	NA	NA	NA
chr10:31661946-31662102/+	54.93	6.667	NA	NA	NA	NA	NA	NA	NA	NA	NA	NA	NA	NA	NA	NA	NA	NA	24.683	6.147	NA	NA	NA	NA	NA	NA	NA	NA	NA	NA
chr10:31663731-31663893/+	NA	NA	NA	NA	NA	NA	NA	NA	NA	NA	15.702	0	NA	NA	NA	NA	NA	NA	NA	NA	NA	NA	NA	NA	NA	NA	NA	NA	NA	NA
chr10:31676052-31676195/+	32.743	17.647	87.879	15.789	NA	NA	NA	NA	NA	NA	NA	NA	48	30.579	NA	NA	NA	NA	37.5	11.081	31.806	8.108	NA	NA	NA	NA	NA	NA	NA	NA
chr10:31676648-31676727/+	NA	NA	NA	NA	NA	NA	NA	NA	NA	NA	NA	NA	9.783	0	NA	NA	NA	NA	8.664	2.351	NA	NA	NA	NA	NA	NA	NA	NA	52.212	0
chr10:31784704-31784767/+	NA	NA	NA	NA	100	87.629	NA	NA	NA	NA	NA	NA	NA	NA	NA	NA	NA	NA	NA	NA	NA	NA	NA	NA	NA	NA	NA	NA	NA	NA
chr10:31784707-31784767/+	NA	NA	NA	NA	100	87.755	NA	NA	NA	NA	NA	NA	NA	NA	NA	NA	NA	NA	NA	NA	NA	NA	NA	NA	NA	NA	NA	NA	NA	NA
chr10:32142993-32143134/-	NA	NA	NA	NA	NA	NA	74.384	55.738	NA	NA	80	66.667	NA	NA	NA	NA	NA	NA	NA	NA	NA	NA	NA	NA	NA	NA	NA	NA	NA	NA
chr10:33208812-33209325/-	100	99.888	NA	NA	NA	NA	NA	NA	NA	NA	NA	NA	NA	NA	NA	NA	NA	NA	NA	NA	NA	NA	NA	NA	NA	NA	NA	NA	NA	NA
chr10:33212512-33212668/-	100	99.903	NA	NA	NA	NA	NA	NA	NA	NA	NA	NA	NA	NA	NA	NA	NA	NA	NA	NA	NA	NA	NA	NA	NA	NA	NA	NA	NA	NA
chr10:33215789-33215833/-	0.552	0.004	NA	NA	NA	NA	NA	NA	NA	NA	NA	NA	NA	NA	NA	NA	NA	NA	NA	NA	NA	NA	NA	NA	NA	NA	NA	NA	NA	NA
chr10:33242520-33242737/-	11.685	5.551	NA	NA	NA	NA	NA	NA	NA	NA	NA	NA	NA	NA	NA	NA	NA	NA	NA	NA	NA	NA	NA	NA	NA	NA	NA	NA	NA	NA
chr10:33482142-33483708/-	0.44	0	NA	NA	NA	NA	NA	NA	NA	NA	NA	NA	NA	NA	NA	NA	NA	NA	NA	NA	NA	NA	NA	NA	NA	NA	NA	NA	NA	NA
chr10:33491818-33491923/-	NA	NA	NA	NA	98.174	96.839	NA	NA	NA	NA	97.618	94.94	NA	NA	NA	NA	NA	NA	NA	NA	NA	NA	NA	NA	NA	NA	NA	NA	NA	NA
chr10:33491839-33491923/-	NA	NA	NA	NA	97.688	96.015	NA	NA	NA	NA	96.554	92.299	NA	NA	NA	NA	NA	NA	NA	NA	NA	NA	NA	NA	NA	NA	NA	NA	NA	NA
chr10:34625126-34625168/-	NA	NA	NA	NA	100	66.845	NA	NA	NA	NA	NA	NA	NA	NA	NA	NA	NA	NA	NA	NA	NA	NA	NA	NA	NA	NA	NA	NA	NA	NA
chr10:34625126-34625171/-	NA	NA	NA	NA	90.879	78.169	NA	NA	NA	NA	NA	NA	NA	NA	NA	NA	NA	NA	68.421	45	NA	NA	NA	NA	NA	NA	NA	NA	NA	NA
chr10:34688257-34688341/-	100	99.377	NA	NA	NA	NA	NA	NA	NA	NA	NA	NA	NA	NA	NA	NA	NA	NA	NA	NA	NA	NA	NA	NA	NA	NA	NA	NA	NA	NA
chr10:35477127-35477316/+	NA	NA	NA	NA	NA	NA	NA	NA	NA	NA	NA	NA	52.941	35.075	NA	NA	NA	NA	NA	NA	NA	NA	NA	NA	NA	NA	NA	NA	NA	NA
chr10:35490378-35490414/+	NA	NA	NA	NA	NA	NA	NA	NA	NA	NA	NA	NA	34.694	14.019	NA	NA	NA	NA	NA	NA	NA	NA	NA	NA	NA	NA	NA	NA	NA	NA
chr10:35772331-35772406/+	NA	NA	NA	NA	NA	NA	NA	NA	NA	NA	NA	NA	NA	NA	100	95.735	NA	NA	NA	NA	NA	NA	NA	NA	NA	NA	NA	NA	NA	NA
chr10:35790428-35790463/+	NA	NA	100	91.787	NA	NA	100	98.586	NA	NA	NA	NA	NA	NA	NA	NA	NA	NA	NA	NA	NA	NA	NA	NA	NA	NA	NA	NA	NA	NA
chr10:35805450-35805551/+	NA	NA	NA	NA	NA	NA	97.509	93.498	NA	NA	NA	NA	NA	NA	NA	NA	NA	NA	NA	NA	NA	NA	NA	NA	NA	NA	NA	NA	NA	NA
chr10:35814891-35814927/+	NA	NA	NA	NA	NA	NA	NA	NA	NA	NA	NA	NA	NA	NA	NA	NA	NA	NA	NA	NA	NA	NA	NA	NA	100	94.516	NA	NA	NA	NA
chr10:35819051-35819171/+	NA	NA	NA	NA	NA	NA	NA	NA	NA	NA	100	98.293	NA	NA	NA	NA	NA	NA	NA	NA	NA	NA	NA	NA	NA	NA	NA	NA	NA	NA
chr10:43609003-43609123/+	NA	NA	NA	NA	100	99.789	NA	NA	NA	NA	NA	NA	NA	NA	NA	NA	NA	NA	NA	NA	NA	NA	NA	NA	NA	NA	NA	NA	NA	NA
chr10:43659313-43659383/+	NA	NA	NA	NA	NA	NA	NA	NA	NA	NA	NA	NA	NA	NA	NA	NA	NA	NA	NA	NA	100	86.111	NA	NA	NA	NA	NA	NA	NA	NA
chr10:43659313-43659492/+	NA	NA	NA	NA	NA	NA	NA	NA	NA	NA	NA	NA	NA	NA	100	90.291	NA	NA	NA	NA	100	93.103	NA	NA	NA	NA	NA	NA	NA	NA
chr10:43662451-43662546/+	100	87.898	NA	NA	NA	NA	NA	NA	NA	NA	NA	NA	NA	NA	NA	NA	NA	NA	NA	NA	NA	NA	NA	NA	NA	NA	NA	NA	NA	NA
chr10:43662451-43662607/+	100	79.006	NA	NA	NA	NA	NA	NA	NA	NA	NA	NA	NA	NA	NA	NA	NA	NA	NA	NA	NA	NA	NA	NA	NA	NA	NA	NA	NA	NA
chr10:45958598-45959444/-	NA	NA	13.501	4.242	NA	NA	NA	NA	NA	NA	NA	NA	NA	NA	NA	NA	NA	NA	14.815	5.936	NA	NA	NA	NA	NA	NA	NA	NA	NA	NA
chr10:47122003-47122297/-	45.098	15.152	NA	NA	NA	NA	NA	NA	NA	NA	NA	NA	NA	NA	NA	NA	NA	NA	NA	NA	NA	NA	NA	NA	NA	NA	NA	NA	NA	NA
chr10:47162121-47162180/-	NA	NA	NA	NA	NA	NA	NA	NA	NA	NA	NA	NA	NA	NA	99.484	98.469	NA	NA	NA	NA	NA	NA	NA	NA	NA	NA	NA	NA	NA	NA
chr10:47167069-47167103/-	NA	NA	NA	NA	NA	NA	NA	NA	NA	NA	NA	NA	NA	NA	99.959	99.542	NA	NA	NA	NA	NA	NA	NA	NA	NA	NA	NA	NA	NA	NA
chr10:47167069-47167183/-	NA	NA	NA	NA	NA	NA	NA	NA	NA	NA	NA	NA	NA	NA	99.961	99.71	NA	NA	NA	NA	NA	NA	NA	NA	NA	NA	NA	NA	NA	NA
chr10:47753578-47753789/+	NA	NA	NA	NA	NA	NA	NA	NA	NA	NA	NA	NA	NA	NA	100	73.516	NA	NA	NA	NA	NA	NA	NA	NA	NA	NA	NA	NA	NA	NA
chr10:47753837-47753951/+	NA	NA	NA	NA	NA	NA	NA	NA	NA	NA	NA	NA	NA	NA	99.752	99.539	NA	NA	NA	NA	NA	NA	NA	NA	NA	NA	NA	NA	NA	NA
chr10:47753917-47753951/+	NA	NA	NA	NA	NA	NA	NA	NA	NA	NA	NA	NA	NA	NA	99.959	99.564	NA	NA	NA	NA	NA	NA	NA	NA	NA	NA	NA	NA	NA	NA
chr10:47754714-47754805/+	NA	NA	NA	NA	NA	NA	NA	NA	NA	NA	NA	NA	NA	NA	96.464	95.569	NA	NA	NA	NA	NA	NA	NA	NA	NA	NA	NA	NA	NA	NA
chr10:48262167-48262281/+	NA	NA	NA	NA	NA	NA	NA	NA	NA	NA	NA	NA	NA	NA	99.961	99.627	NA	NA	NA	NA	NA	NA	NA	NA	NA	NA	NA	NA	NA	NA
chr10:48262247-48262281/+	NA	NA	NA	NA	NA	NA	NA	NA	NA	NA	NA	NA	NA	NA	99.959	99.432	NA	NA	NA	NA	NA	NA	NA	NA	NA	NA	NA	NA	NA	NA
chr10:48266341-48267229/+	NA	NA	NA	NA	NA	NA	NA	NA	NA	NA	NA	NA	NA	NA	98.953	97.669	NA	NA	NA	NA	NA	NA	NA	NA	NA	NA	NA	NA	NA	NA
chr10:48267170-48267229/+	NA	NA	NA	NA	NA	NA	NA	NA	NA	NA	NA	NA	NA	NA	99.613	98.977	NA	NA	NA	NA	NA	NA	NA	NA	NA	NA	NA	NA	NA	NA
chr10:4879634-4879773/+	79.879	0	NA	NA	NA	NA	NA	NA	NA	NA	NA	NA	NA	NA	NA	NA	NA	NA	NA	NA	NA	NA	NA	NA	NA	NA	NA	NA	NA	NA
chr10:4879650-4879773/+	91.646	85.185	NA	NA	92.143	77.358	82.609	62.887	NA	NA	NA	NA	NA	NA	NA	NA	NA	NA	NA	NA	NA	NA	NA	NA	NA	NA	NA	NA	NA	NA
chr10:4881920-4882018/+	75.974	68.163	NA	NA	NA	NA	NA	NA	NA	NA	NA	NA	NA	NA	NA	NA	NA	NA	NA	NA	100	72.093	NA	NA	NA	NA	NA	NA	NA	NA
chr10:4883976-4884049/+	37.54	27.059	NA	NA	70.796	51.02	NA	NA	NA	NA	NA	NA	NA	NA	NA	NA	NA	NA	NA	NA	NA	NA	NA	NA	NA	NA	NA	NA	NA	NA
chr10:4915405-4915499/+	67.401	27.273	NA	NA	NA	NA	NA	NA	NA	NA	NA	NA	NA	NA	NA	NA	NA	NA	NA	NA	NA	NA	NA	NA	NA	NA	NA	NA	NA	NA
chr10:4932063-4932115/+	29.825	9.091	NA	NA	NA	NA	NA	NA	NA	NA	NA	NA	NA	NA	NA	NA	NA	NA	NA	NA	NA	NA	NA	NA	NA	NA	NA	NA	NA	NA
chr10:4951724-4951798/+	64.341	37.5	NA	NA	NA	NA	NA	NA	NA	NA	NA	NA	NA	NA	NA	NA	NA	NA	NA	NA	NA	NA	NA	NA	NA	NA	NA	NA	NA	NA
chr10:5011013-5011136/+	100	99.911	NA	NA	NA	NA	NA	NA	NA	NA	NA	NA	NA	NA	NA	NA	NA	NA	NA	NA	NA	NA	NA	NA	NA	NA	NA	NA	NA	NA
chr10:5045943-5046114/-	99.93	99.434	NA	NA	NA	NA	NA	NA	NA	NA	NA	NA	NA	NA	NA	NA	NA	NA	NA	NA	NA	NA	NA	NA	NA	NA	NA	NA	NA	NA
chr10:5045943-5046117/-	99.931	99.434	NA	NA	NA	NA	NA	NA	NA	NA	NA	NA	NA	NA	NA	NA	NA	NA	NA	NA	NA	NA	NA	NA	NA	NA	NA	NA	NA	NA
chr10:5045943-5046168/-	99.93	99.432	NA	NA	NA	NA	NA	NA	NA	NA	NA	NA	NA	NA	NA	NA	NA	NA	NA	NA	NA	NA	NA	NA	NA	NA	NA	NA	NA	NA
chr10:5045943-5046206/-	99.933	99.48	NA	NA	NA	NA	NA	NA	NA	NA	NA	NA	NA	NA	NA	NA	NA	NA	NA	NA	NA	NA	NA	NA	NA	NA	NA	NA	NA	NA
chr10:5048650-5048784/-	60.795	37.6	NA	NA	NA	NA	NA	NA	NA	NA	NA	NA	NA	NA	NA	NA	NA	NA	NA	NA	NA	NA	NA	NA	NA	NA	NA	NA	NA	NA
chr10:5048667-5048784/-	53.386	35.478	NA	NA	NA	NA	NA	NA	NA	NA	NA	NA	NA	NA	NA	NA	NA	NA	NA	NA	NA	NA	NA	NA	NA	NA	NA	NA	NA	NA
chr10:5048717-5048784/-	51.948	0	NA	NA	NA	NA	NA	NA	NA	NA	NA	NA	NA	NA	NA	NA	NA	NA	NA	NA	NA	NA	NA	NA	NA	NA	NA	NA	NA	NA
chr10:51307787-51307906/-	NA	NA	NA	NA	NA	NA	13.247	1.852	NA	NA	NA	NA	NA	NA	NA	NA	NA	NA	NA	NA	NA	NA	NA	NA	NA	NA	NA	NA	NA	NA
chr10:51580555-51580968/+	NA	NA	100	98.621	NA	NA	NA	NA	NA	NA	NA	NA	NA	NA	NA	NA	NA	NA	NA	NA	NA	NA	NA	NA	NA	NA	NA	NA	NA	NA
chr10:51610392-51610425/-	NA	NA	NA	NA	100	97.608	NA	NA	NA	NA	NA	NA	NA	NA	NA	NA	NA	NA	NA	NA	NA	NA	NA	NA	NA	NA	NA	NA	NA	NA
chr10:51612903-51612988/-	NA	NA	NA	NA	NA	NA	NA	NA	NA	NA	NA	NA	NA	NA	NA	NA	NA	NA	NA	NA	NA	NA	NA	NA	NA	NA	NA	NA	100	92.214
chr10:51612908-51612988/-	59.135	0	NA	NA	NA	NA	NA	NA	NA	NA	NA	NA	NA	NA	NA	NA	NA	NA	NA	NA	NA	NA	NA	NA	NA	NA	NA	NA	NA	NA
chr10:52100976-52101194/-	NA	NA	NA	NA	NA	NA	9.714	0	NA	NA	NA	NA	NA	NA	NA	NA	NA	NA	NA	NA	NA	NA	NA	NA	NA	NA	NA	NA	NA	NA
chr10:52279590-52279681/-	NA	NA	NA	NA	NA	NA	83.838	51.852	NA	NA	NA	NA	NA	NA	NA	NA	NA	NA	NA	NA	NA	NA	NA	NA	NA	NA	NA	NA	NA	NA
chr10:5494787-5494883/+	NA	NA	NA	NA	NA	NA	99.528	98.261	NA	NA	NA	NA	NA	NA	NA	NA	NA	NA	NA	NA	NA	NA	NA	NA	NA	NA	NA	NA	NA	NA
chr10:5494820-5494883/+	NA	NA	NA	NA	NA	NA	99.707	99.053	NA	NA	NA	NA	NA	NA	NA	NA	NA	NA	NA	NA	NA	NA	NA	NA	NA	NA	NA	NA	NA	NA
chr10:5754356-5754502/+	NA	NA	NA	NA	NA	NA	NA	NA	NA	NA	71.93	24.771	90.476	66.667	67.123	46.729	NA	NA	NA	NA	NA	NA	NA	NA	NA	NA	NA	NA	NA	NA
chr10:5759621-5759713/+	NA	NA	NA	NA	NA	NA	NA	NA	NA	NA	NA	NA	NA	NA	NA	NA	NA	NA	NA	NA	NA	NA	NA	NA	76.923	54.472	NA	NA	NA	NA
chr10:5836847-5836982/-	NA	NA	NA	NA	NA	NA	NA	NA	NA	NA	NA	NA	100	97.988	NA	NA	NA	NA	NA	NA	NA	NA	NA	NA	NA	NA	NA	NA	NA	NA
chr10:5836950-5836982/-	NA	NA	NA	NA	NA	NA	NA	NA	NA	NA	NA	NA	NA	NA	NA	NA	NA	NA	NA	NA	NA	NA	NA	NA	NA	NA	NA	NA	100	0
chr10:5937018-5937150/+	NA	NA	86.364	60.606	NA	NA	NA	NA	NA	NA	NA	NA	NA	NA	NA	NA	NA	NA	NA	NA	NA	NA	NA	NA	NA	NA	NA	NA	NA	NA
chr10:5965583-5965659/+	NA	NA	NA	NA	NA	NA	99.313	95.973	NA	NA	NA	NA	NA	NA	NA	NA	NA	NA	NA	NA	NA	NA	NA	NA	NA	NA	NA	NA	NA	NA
chr10:5966713-5966764/+	NA	NA	23.457	6.422	NA	NA	NA	NA	NA	NA	NA	NA	NA	NA	NA	NA	NA	NA	NA	NA	NA	NA	NA	NA	NA	NA	NA	NA	NA	NA
chr10:60376655-60376727/+	3.704	0	NA	NA	NA	NA	NA	NA	NA	NA	NA	NA	NA	NA	NA	NA	NA	NA	NA	NA	NA	NA	NA	NA	NA	NA	NA	NA	NA	NA
chr10:69718869-69718893/-	NA	NA	4.267	1.124	NA	NA	NA	NA	NA	NA	15.822	3.758	NA	NA	NA	NA	NA	NA	NA	NA	7.048	0	NA	NA	NA	NA	NA	NA	NA	NA
chr10:69747799-69747901/-	31.25	4.918	NA	NA	NA	NA	NA	NA	NA	NA	NA	NA	NA	NA	NA	NA	NA	NA	NA	NA	NA	NA	NA	NA	NA	NA	NA	NA	NA	NA
chr10:69749967-69750157/-	99.213	95.628	NA	NA	NA	NA	NA	NA	NA	NA	NA	NA	NA	NA	NA	NA	NA	NA	NA	NA	NA	NA	NA	NA	NA	NA	NA	NA	NA	NA
chr10:69755802-69755895/-	NA	NA	NA	NA	NA	NA	NA	NA	NA	NA	9.22	0	NA	NA	NA	NA	NA	NA	NA	NA	NA	NA	NA	NA	NA	NA	NA	NA	NA	NA
chr10:69799155-69799245/-	NA	NA	NA	NA	NA	NA	NA	NA	NA	NA	8.295	1.25	NA	NA	NA	NA	NA	NA	11.351	0.935	NA	NA	NA	NA	NA	NA	NA	NA	NA	NA
chr10:69799173-69799245/-	9.756	0	NA	NA	NA	NA	NA	NA	NA	NA	NA	NA	18.28	0	NA	NA	NA	NA	NA	NA	NA	NA	NA	NA	NA	NA	NA	NA	NA	NA
chr10:69804160-69804320/-	NA	NA	NA	NA	NA	NA	NA	NA	NA	NA	NA	NA	NA	NA	NA	NA	NA	NA	100	97.037	NA	NA	NA	NA	NA	NA	NA	NA	NA	NA
chr10:69818312-69818510/-	NA	NA	NA	NA	NA	NA	NA	NA	NA	NA	4.376	1.095	NA	NA	NA	NA	NA	NA	NA	NA	NA	NA	NA	NA	NA	NA	NA	NA	NA	NA
chr10:69826841-69826974/-	NA	NA	NA	NA	NA	NA	NA	NA	NA	NA	13.367	3.929	NA	NA	NA	NA	NA	NA	10.714	3.265	NA	NA	NA	NA	NA	NA	NA	NA	NA	NA
chr10:69908109-69908224/+	NA	NA	100	97.963	NA	NA	NA	NA	NA	NA	NA	NA	NA	NA	NA	NA	NA	NA	NA	NA	NA	NA	NA	NA	NA	NA	NA	NA	NA	NA
chr10:69908109-69908320/+	NA	NA	100	96.166	NA	NA	NA	NA	NA	NA	NA	NA	NA	NA	NA	NA	NA	NA	NA	NA	NA	NA	NA	NA	NA	NA	NA	NA	NA	NA
chr10:69921485-69921509/+	NA	NA	96.806	93.62	NA	NA	NA	NA	NA	NA	NA	NA	NA	NA	NA	NA	NA	NA	NA	NA	NA	NA	NA	NA	NA	NA	NA	NA	NA	NA
chr10:70097614-70097753/+	NA	NA	100	79.461	NA	NA	NA	NA	NA	NA	NA	NA	NA	NA	NA	NA	NA	NA	NA	NA	NA	NA	NA	NA	NA	NA	NA	NA	NA	NA
chr10:70225423-70225569/-	NA	NA	NA	NA	NA	NA	NA	NA	NA	NA	NA	NA	100	93.665	NA	NA	NA	NA	NA	NA	NA	NA	NA	NA	NA	NA	NA	NA	NA	NA
chr10:70499743-70500418/+	NA	NA	NA	NA	NA	NA	91.973	0	NA	NA	NA	NA	NA	NA	NA	NA	NA	NA	NA	NA	NA	NA	NA	NA	NA	NA	NA	NA	NA	NA
chr10:70500391-70500418/+	NA	NA	89.744	0	NA	NA	NA	NA	NA	NA	NA	NA	NA	NA	NA	NA	NA	NA	79.688	0	NA	NA	NA	NA	NA	NA	NA	NA	NA	NA
chr10:70516029-70516240/+	NA	NA	99.136	84.466	NA	NA	NA	NA	NA	NA	NA	NA	NA	NA	100	96.063	NA	NA	NA	NA	NA	NA	NA	NA	NA	NA	NA	NA	NA	NA
chr10:71244896-71244971/+	100	97.964	NA	NA	NA	NA	NA	NA	NA	NA	NA	NA	NA	NA	NA	NA	NA	NA	NA	NA	NA	NA	NA	NA	NA	NA	NA	NA	NA	NA
chr10:71880847-71880967/-	NA	NA	NA	NA	NA	NA	NA	NA	100	93.927	NA	NA	NA	NA	NA	NA	NA	NA	NA	NA	NA	NA	NA	NA	NA	NA	NA	NA	NA	NA
chr10:72484923-72485098/+	NA	NA	NA	NA	3.166	0	NA	NA	NA	NA	NA	NA	NA	NA	NA	NA	NA	NA	NA	NA	NA	NA	NA	NA	NA	NA	NA	NA	NA	NA
chr10:73111318-73111545/+	NA	NA	NA	NA	NA	NA	NA	NA	NA	NA	NA	NA	NA	NA	NA	NA	100	82.949	NA	NA	NA	NA	NA	NA	NA	NA	NA	NA	NA	NA
chr10:73583644-73583653/-	NA	NA	NA	NA	42.075	37.876	NA	NA	NA	NA	NA	NA	NA	NA	NA	NA	NA	NA	NA	NA	NA	NA	NA	NA	NA	NA	NA	NA	NA	NA
chr10:73583644-73583864/-	NA	NA	NA	NA	26.042	22.392	NA	NA	NA	NA	NA	NA	NA	NA	NA	NA	NA	NA	NA	NA	NA	NA	NA	NA	NA	NA	NA	NA	NA	NA
chr10:7407185-7407477/-	NA	NA	13.001	0	NA	NA	NA	NA	NA	NA	NA	NA	NA	NA	NA	NA	NA	NA	NA	NA	NA	NA	NA	NA	NA	NA	NA	NA	NA	NA
chr10:74474868-74474984/+	99.196	76.923	100	77.778	NA	NA	NA	NA	NA	NA	NA	NA	NA	NA	NA	NA	NA	NA	NA	NA	52.531	19.318	NA	NA	NA	NA	NA	NA	NA	NA
chr10:74475611-74475660/+	NA	NA	NA	NA	NA	NA	NA	NA	66.055	31.884	NA	NA	NA	NA	NA	NA	NA	NA	NA	NA	NA	NA	NA	NA	83.333	31.707	NA	NA	NA	NA
chr10:74803644-74803715/-	NA	NA	NA	NA	73.016	66.7	90.494	87.587	NA	NA	NA	NA	88.618	82.739	NA	NA	NA	NA	72	65.068	NA	NA	NA	NA	NA	NA	NA	NA	NA	NA
chr10:75147446-75147541/-	NA	NA	NA	NA	NA	NA	100	98.503	NA	NA	NA	NA	NA	NA	NA	NA	NA	NA	NA	NA	NA	NA	NA	NA	NA	NA	NA	NA	NA	NA
chr10:75155801-75155867/-	NA	NA	NA	NA	NA	NA	NA	NA	NA	NA	NA	NA	NA	NA	0.859	0.083	NA	NA	NA	NA	NA	NA	NA	NA	NA	NA	NA	NA	NA	NA
chr10:75156276-75156326/-	100	98.986	NA	NA	NA	NA	NA	NA	NA	NA	NA	NA	NA	NA	NA	NA	NA	NA	NA	NA	NA	NA	NA	NA	NA	NA	NA	NA	NA	NA
chr10:75156276-75156341/-	NA	NA	NA	NA	NA	NA	NA	NA	NA	NA	NA	NA	100	98.832	NA	NA	NA	NA	NA	NA	NA	NA	NA	NA	NA	NA	NA	NA	NA	NA
chr10:75156921-75156990/-	NA	NA	NA	NA	NA	NA	100	93.369	NA	NA	NA	NA	NA	NA	NA	NA	100	92.711	NA	NA	NA	NA	NA	NA	NA	NA	NA	NA	NA	NA
chr10:75458995-75459346/-	67.568	0	NA	NA	NA	NA	NA	NA	NA	NA	NA	NA	NA	NA	NA	NA	NA	NA	NA	NA	NA	NA	NA	NA	NA	NA	NA	NA	NA	NA
chr10:75579289-75579375/-	NA	NA	NA	NA	100	19.792	NA	NA	NA	NA	NA	NA	NA	NA	NA	NA	NA	NA	NA	NA	NA	NA	NA	NA	NA	NA	NA	NA	NA	NA
chr10:75830781-75830841/+	NA	NA	39.45	0	NA	NA	NA	NA	NA	NA	NA	NA	NA	NA	NA	NA	NA	NA	NA	NA	NA	NA	NA	NA	NA	NA	NA	NA	NA	NA
chr10:75871666-75871870/+	NA	NA	NA	NA	NA	NA	NA	NA	NA	NA	12.066	6.597	NA	NA	NA	NA	NA	NA	NA	NA	NA	NA	NA	NA	NA	NA	NA	NA	NA	NA
chr10:76977645-76977749/+	9.91	5.561	NA	NA	NA	NA	NA	NA	NA	NA	NA	NA	NA	NA	NA	NA	NA	NA	NA	NA	NA	NA	NA	NA	NA	NA	NA	NA	NA	NA
chr10:78761164-78761338/-	NA	NA	NA	NA	33.333	6.542	NA	NA	NA	NA	NA	NA	NA	NA	NA	NA	NA	NA	NA	NA	NA	NA	NA	NA	NA	NA	NA	NA	NA	NA
chr10:79799961-79799983/+	NA	NA	13.095	7.297	NA	NA	NA	NA	NA	NA	NA	NA	NA	NA	NA	NA	NA	NA	NA	NA	NA	NA	NA	NA	NA	NA	NA	NA	NA	NA
chr10:81940696-81940892/-	NA	NA	NA	NA	NA	NA	NA	NA	NA	NA	100	3.354	NA	NA	NA	NA	NA	NA	NA	NA	NA	NA	NA	NA	NA	NA	NA	NA	NA	NA
chr10:82228302-82228443/+	73.279	52.239	NA	NA	NA	NA	NA	NA	NA	NA	NA	NA	89.189	63.38	NA	NA	85.714	25.455	NA	NA	NA	NA	NA	NA	NA	NA	NA	NA	NA	NA
chr10:88603162-88603267/+	NA	NA	NA	NA	NA	NA	NA	NA	NA	NA	NA	NA	32.143	12.057	NA	NA	NA	NA	NA	NA	NA	NA	NA	NA	17.431	7.383	60	8.169	67.164	7.383
chr10:88820444-88820582/-	NA	NA	NA	NA	NA	NA	NA	NA	NA	NA	100	98.645	NA	NA	NA	NA	NA	NA	NA	NA	NA	NA	NA	NA	NA	NA	NA	NA	NA	NA
chr10:88820444-88820809/-	NA	NA	NA	NA	NA	NA	NA	NA	NA	NA	100	98.811	NA	NA	NA	NA	NA	NA	NA	NA	NA	NA	NA	NA	NA	NA	NA	NA	NA	NA
chr10:88820671-88820809/-	NA	NA	NA	NA	NA	NA	NA	NA	NA	NA	100	98.741	NA	NA	NA	NA	NA	NA	NA	NA	NA	NA	NA	NA	NA	NA	NA	NA	NA	NA
chr10:889067-889237/-	14.685	6.151	NA	NA	NA	NA	NA	NA	NA	NA	NA	NA	NA	NA	NA	NA	NA	NA	NA	NA	NA	NA	NA	NA	NA	NA	NA	NA	NA	NA
chr10:889067-890718/-	14.685	5.654	19.192	1.404	NA	NA	NA	NA	NA	NA	NA	NA	NA	NA	NA	NA	NA	NA	NA	NA	NA	NA	NA	NA	NA	NA	NA	NA	NA	NA
chr10:88935645-88935852/+	NA	NA	88.976	78.447	NA	NA	NA	NA	NA	NA	NA	NA	NA	NA	NA	NA	NA	NA	NA	NA	NA	NA	NA	NA	NA	NA	NA	NA	NA	NA
chr10:890916-890995/-	NA	NA	NA	NA	NA	NA	NA	NA	NA	NA	NA	NA	100	95.633	NA	NA	NA	NA	NA	NA	NA	NA	NA	NA	NA	NA	NA	NA	NA	NA
chr10:89530708-89530798/-	NA	NA	100	97.762	NA	NA	NA	NA	NA	NA	100	96.056	NA	NA	NA	NA	NA	NA	NA	NA	NA	NA	NA	NA	NA	NA	NA	NA	NA	NA
chr10:89544226-89544427/-	NA	NA	100	99.653	NA	NA	NA	NA	NA	NA	NA	NA	NA	NA	NA	NA	NA	NA	NA	NA	NA	NA	NA	NA	NA	NA	NA	NA	NA	NA
chr10:89653781-89653866/+	NA	NA	99.428	96.612	NA	NA	NA	NA	99.561	91.346	NA	NA	NA	NA	NA	NA	NA	NA	NA	NA	NA	NA	NA	NA	NA	NA	NA	NA	NA	NA
chr10:915952-916023/-	NA	NA	5.009	1.702	NA	NA	9.917	4.397	NA	NA	7.846	4.436	NA	NA	NA	NA	NA	NA	NA	NA	NA	NA	NA	NA	NA	NA	NA	NA	NA	NA
chr10:93723833-93723958/+	NA	NA	NA	NA	NA	NA	NA	NA	NA	NA	NA	NA	100	99.211	NA	NA	NA	NA	NA	NA	NA	NA	NA	NA	NA	NA	NA	NA	NA	NA
chr10:93767879-93768032/+	NA	NA	NA	NA	NA	NA	NA	NA	NA	NA	NA	NA	NA	NA	100	98.288	NA	NA	NA	NA	NA	NA	NA	NA	NA	NA	NA	NA	NA	NA
chr10:94216115-94216188/-	100	98.263	NA	NA	NA	NA	NA	NA	NA	NA	NA	NA	NA	NA	NA	NA	NA	NA	NA	NA	NA	NA	NA	NA	NA	NA	NA	NA	NA	NA
chr10:96207391-96207427/+	26.154	0	NA	NA	NA	NA	NA	NA	NA	NA	NA	NA	78.378	6.667	41.935	0	NA	NA	NA	NA	NA	NA	NA	NA	NA	NA	NA	NA	53.333	4.167
chr10:96211314-96211366/+	38.235	0	NA	NA	NA	NA	NA	NA	NA	NA	NA	NA	NA	NA	NA	NA	NA	NA	NA	NA	NA	NA	NA	NA	NA	NA	NA	NA	34.426	0
chr10:96281711-96281840/+	NA	NA	100	89.157	NA	NA	NA	NA	NA	NA	NA	NA	NA	NA	NA	NA	NA	NA	NA	NA	NA	NA	NA	NA	NA	NA	NA	NA	NA	NA
chr10:97396849-97396954/-	NA	NA	NA	NA	NA	NA	NA	NA	NA	NA	NA	NA	NA	NA	NA	NA	100	98.978	NA	NA	NA	NA	NA	NA	NA	NA	NA	NA	NA	NA
chr10:97402748-97402963/-	NA	NA	NA	NA	NA	NA	NA	NA	99.589	98.607	NA	NA	NA	NA	NA	NA	NA	NA	NA	NA	NA	NA	NA	NA	NA	NA	NA	NA	NA	NA
chr10:98703869-98704002/+	NA	NA	NA	NA	NA	NA	NA	NA	NA	NA	NA	NA	NA	NA	NA	NA	NA	NA	NA	NA	NA	NA	NA	NA	NA	NA	NA	NA	100	76.19
chr10:99023176-99023246/-	NA	NA	NA	NA	NA	NA	NA	NA	NA	NA	NA	NA	100	94.805	NA	NA	NA	NA	NA	NA	NA	NA	NA	NA	NA	NA	NA	NA	NA	NA
chr10:99023176-99023386/-	NA	NA	NA	NA	NA	NA	NA	NA	NA	NA	NA	NA	100	97.052	NA	NA	NA	NA	NA	NA	NA	NA	NA	NA	NA	NA	NA	NA	NA	NA
chr10:99196947-99197032/-	100	98.959	NA	NA	NA	NA	NA	NA	NA	NA	NA	NA	NA	NA	NA	NA	100	95.544	NA	NA	NA	NA	NA	NA	NA	NA	NA	NA	NA	NA
chr10:99221252-99221379/-	NA	NA	NA	NA	NA	NA	NA	NA	NA	NA	97.739	94.203	98.667	94.274	NA	NA	NA	NA	NA	NA	NA	NA	NA	NA	NA	NA	NA	NA	NA	NA
chr10:99236591-99236720/-	NA	NA	95.577	92.263	NA	NA	NA	NA	NA	NA	NA	NA	88.489	79.278	NA	NA	NA	NA	NA	NA	94.777	88.863	NA	NA	NA	NA	NA	NA	NA	NA
chr10:99422663-99422725/+	NA	NA	NA	NA	NA	NA	NA	NA	NA	NA	NA	NA	NA	NA	100	98.414	NA	NA	NA	NA	NA	NA	NA	NA	NA	NA	NA	NA	NA	NA
chr11:1000431-1000598/+	NA	NA	95.42	72.603	NA	NA	NA	NA	NA	NA	NA	NA	NA	NA	NA	NA	NA	NA	NA	NA	NA	NA	NA	NA	NA	NA	NA	NA	NA	NA
chr11:1000431-1000684/+	NA	NA	94.059	31.034	NA	NA	NA	NA	NA	NA	NA	NA	NA	NA	NA	NA	NA	NA	NA	NA	NA	NA	NA	NA	NA	NA	NA	NA	NA	NA
chr11:10013961-10014090/-	NA	NA	NA	NA	NA	NA	NA	NA	100	77.108	NA	NA	NA	NA	NA	NA	NA	NA	NA	NA	NA	NA	NA	NA	NA	NA	NA	NA	NA	NA
chr11:10013996-10014090/-	NA	NA	NA	NA	NA	NA	NA	NA	NA	NA	NA	NA	NA	NA	NA	NA	NA	NA	85.714	0	NA	NA	NA	NA	NA	NA	NA	NA	NA	NA
chr11:10019812-10019926/-	NA	NA	100	97.727	NA	NA	NA	NA	NA	NA	NA	NA	NA	NA	NA	NA	NA	NA	NA	NA	NA	NA	NA	NA	NA	NA	NA	NA	NA	NA
chr11:102080247-102080295/+	NA	NA	NA	NA	NA	NA	NA	NA	NA	NA	NA	NA	NA	NA	NA	NA	NA	NA	NA	NA	NA	NA	NA	NA	NA	NA	NA	NA	77.358	33.411
chr11:108119659-108119829/+	NA	NA	NA	NA	NA	NA	NA	NA	NA	NA	NA	NA	98.104	93.872	NA	NA	NA	NA	NA	NA	NA	NA	NA	NA	NA	NA	NA	NA	NA	NA
chr11:108202605-108202764/+	NA	NA	NA	NA	100	94.048	NA	NA	NA	NA	NA	NA	NA	NA	NA	NA	NA	NA	NA	NA	NA	NA	NA	NA	NA	NA	NA	NA	NA	NA
chr11:10828366-10828432/-	98.83	97.05	NA	NA	NA	NA	NA	NA	NA	NA	NA	NA	NA	NA	NA	NA	NA	NA	NA	NA	NA	NA	NA	NA	NA	NA	NA	NA	NA	NA
chr11:111624166-111624301/-	NA	NA	NA	NA	NA	NA	NA	NA	NA	NA	100	92.547	NA	NA	NA	NA	NA	NA	NA	NA	NA	NA	NA	NA	NA	NA	NA	NA	NA	NA
chr11:116738661-116738805/-	NA	NA	NA	NA	NA	NA	NA	NA	NA	NA	NA	NA	NA	NA	NA	NA	NA	NA	NA	NA	NA	NA	NA	NA	NA	NA	NA	NA	100	73.737
chr11:117030649-117030739/+	NA	NA	NA	NA	NA	NA	NA	NA	NA	NA	99.692	98.206	NA	NA	NA	NA	NA	NA	NA	NA	NA	NA	NA	NA	NA	NA	NA	NA	NA	NA
chr11:117031860-117031977/+	NA	NA	NA	NA	NA	NA	NA	NA	NA	NA	99.765	96.41	NA	NA	NA	NA	NA	NA	NA	NA	NA	NA	NA	NA	NA	NA	NA	NA	NA	NA
chr11:117164586-117164649/-	NA	NA	NA	NA	100	97.214	NA	NA	NA	NA	NA	NA	NA	NA	NA	NA	NA	NA	NA	NA	NA	NA	NA	NA	NA	NA	NA	NA	NA	NA
chr11:117164586-117164724/-	NA	NA	NA	NA	100	98.371	NA	NA	NA	NA	NA	NA	NA	NA	NA	NA	NA	NA	NA	NA	NA	NA	NA	NA	NA	NA	NA	NA	NA	NA
chr11:118428452-118428605/-	37.209	13.699	NA	NA	NA	NA	30.435	17.514	NA	NA	59.055	33.6	NA	NA	NA	NA	NA	NA	NA	NA	34.545	11.864	NA	NA	NA	NA	NA	NA	32.203	11.656
chr11:118629482-118629611/-	NA	NA	NA	NA	NA	NA	NA	NA	NA	NA	99.658	97.947	NA	NA	NA	NA	NA	NA	NA	NA	NA	NA	NA	NA	NA	NA	NA	NA	NA	NA
chr11:118635916-118636063/-	NA	NA	NA	NA	NA	NA	97.805	94.982	NA	NA	NA	NA	NA	NA	NA	NA	NA	NA	NA	NA	NA	NA	NA	NA	NA	NA	NA	NA	NA	NA
chr11:118968564-118968635/-	96.653	86.014	100	93.488	NA	NA	NA	NA	NA	NA	NA	NA	NA	NA	NA	NA	NA	NA	NA	NA	NA	NA	NA	NA	NA	NA	NA	NA	NA	NA
chr11:118968564-118968753/-	98.964	95.434	100	98.058	NA	NA	NA	NA	NA	NA	NA	NA	NA	NA	NA	NA	NA	NA	NA	NA	NA	NA	NA	NA	NA	NA	NA	NA	NA	NA
chr11:120280102-120280159/+	NA	NA	NA	NA	NA	NA	NA	NA	NA	NA	NA	NA	NA	NA	NA	NA	NA	NA	NA	NA	NA	NA	NA	NA	NA	NA	NA	NA	48.387	8.257
chr11:120300420-120300540/+	NA	NA	91.959	70.115	NA	NA	NA	NA	NA	NA	NA	NA	NA	NA	74.893	68.652	NA	NA	NA	NA	NA	NA	NA	NA	NA	NA	NA	NA	NA	NA
chr11:120300429-120300540/+	NA	NA	NA	NA	NA	NA	NA	NA	NA	NA	76.636	0	NA	NA	NA	NA	NA	NA	NA	NA	NA	NA	NA	NA	NA	NA	NA	NA	NA	NA
chr11:120924338-120924441/+	76	58.537	NA	NA	NA	NA	NA	NA	NA	NA	NA	NA	NA	NA	NA	NA	NA	NA	NA	NA	NA	NA	NA	NA	NA	NA	NA	NA	NA	NA
chr11:120925760-120926017/+	91.304	79.048	NA	NA	NA	NA	NA	NA	NA	NA	NA	NA	NA	NA	NA	NA	NA	NA	NA	NA	NA	NA	NA	NA	NA	NA	NA	NA	NA	NA
chr11:12277189-12277297/+	NA	NA	NA	NA	NA	NA	NA	NA	NA	NA	4.417	1.894	NA	NA	NA	NA	NA	NA	NA	NA	NA	NA	NA	NA	NA	NA	NA	NA	NA	NA
chr11:122931300-122931506/-	NA	NA	NA	NA	NA	NA	98.999	97.953	NA	NA	NA	NA	NA	NA	NA	NA	NA	NA	NA	NA	NA	NA	NA	NA	NA	NA	NA	NA	NA	NA
chr11:124861356-124861479/+	NA	NA	NA	NA	NA	NA	100	49.02	NA	NA	NA	NA	NA	NA	NA	NA	NA	NA	NA	NA	NA	NA	NA	NA	NA	NA	NA	NA	NA	NA
chr11:12518004-12518145/+	NA	NA	NA	NA	NA	NA	NA	NA	NA	NA	100	99.367	NA	NA	NA	NA	NA	NA	NA	NA	NA	NA	NA	NA	NA	NA	NA	NA	NA	NA
chr11:128634545-128634929/+	NA	NA	NA	NA	NA	NA	NA	NA	NA	NA	NA	NA	NA	NA	NA	NA	NA	NA	NA	NA	3.047	1.759	NA	NA	NA	NA	NA	NA	NA	NA
chr11:128669382-128675326/+	NA	NA	NA	NA	NA	NA	NA	NA	NA	NA	NA	NA	NA	NA	NA	NA	NA	NA	NA	NA	97.503	0	NA	NA	NA	NA	NA	NA	NA	NA
chr11:128669382-128677134/+	NA	NA	NA	NA	NA	NA	NA	NA	NA	NA	NA	NA	NA	NA	NA	NA	NA	NA	NA	NA	98.525	0	NA	NA	NA	NA	NA	NA	NA	NA
chr11:12885127-12886295/+	14.321	0	NA	NA	NA	NA	NA	NA	NA	NA	NA	NA	NA	NA	NA	NA	NA	NA	NA	NA	NA	NA	NA	NA	NA	NA	NA	NA	NA	NA
chr11:128993782-128993824/-	81.413	36.585	78.378	0	NA	NA	NA	NA	83.929	37.931	85.124	36.842	NA	NA	85.263	59.14	NA	NA	NA	NA	NA	NA	NA	NA	70	13.158	68.627	34.211	85.43	13.158
chr11:128997106-128997200/-	NA	NA	NA	NA	NA	NA	NA	NA	NA	NA	NA	NA	NA	NA	NA	NA	22.414	0	NA	NA	NA	NA	NA	NA	NA	NA	30.159	12.329	23.333	0
chr11:129990600-129990713/+	NA	NA	100	98.386	NA	NA	NA	NA	100	98.768	NA	NA	NA	NA	NA	NA	NA	NA	100	93.359	NA	NA	NA	NA	NA	NA	NA	NA	NA	NA
chr11:129992199-129992408/+	NA	NA	100	97.301	NA	NA	NA	NA	NA	NA	NA	NA	NA	NA	NA	NA	NA	NA	NA	NA	NA	NA	NA	NA	NA	NA	NA	NA	NA	NA
chr11:129993506-129993674/+	NA	NA	NA	NA	30.388	23.119	NA	NA	NA	NA	NA	NA	NA	NA	NA	NA	NA	NA	NA	NA	NA	NA	NA	NA	NA	NA	NA	NA	NA	NA
chr11:130005457-130005610/+	NA	NA	100	91.111	100	99.048	NA	NA	NA	NA	NA	NA	NA	NA	NA	NA	NA	NA	NA	NA	NA	NA	NA	NA	NA	NA	NA	NA	NA	NA
chr11:130007150-130007186/+	NA	NA	NA	NA	16.993	10.526	NA	NA	NA	NA	NA	NA	NA	NA	NA	NA	NA	NA	NA	NA	NA	NA	NA	NA	NA	NA	NA	NA	NA	NA
chr11:1311456-1311639/-	NA	NA	NA	NA	NA	NA	NA	NA	NA	NA	NA	NA	NA	NA	100	98.683	NA	NA	NA	NA	NA	NA	NA	NA	NA	NA	NA	NA	NA	NA
chr11:134126981-134127151/+	NA	NA	NA	NA	91.358	76.471	NA	NA	NA	NA	NA	NA	NA	NA	NA	NA	88.95	78.313	NA	NA	NA	NA	NA	NA	NA	NA	NA	NA	NA	NA
chr11:134128408-134128518/+	NA	NA	NA	NA	100	92	NA	NA	NA	NA	NA	NA	NA	NA	NA	NA	NA	NA	NA	NA	NA	NA	NA	NA	NA	NA	NA	NA	NA	NA
chr11:14807982-14808078/+	NA	NA	100	82.857	NA	NA	NA	NA	NA	NA	NA	NA	NA	NA	NA	NA	NA	NA	NA	NA	NA	NA	NA	NA	NA	NA	NA	NA	NA	NA
chr11:14807982-14808231/+	NA	NA	100	89.714	NA	NA	NA	NA	NA	NA	NA	NA	NA	NA	NA	NA	NA	NA	NA	NA	NA	NA	NA	NA	NA	NA	NA	NA	NA	NA
chr11:14856527-14856641/+	NA	NA	NA	NA	NA	NA	NA	NA	99.048	94.815	NA	NA	NA	NA	NA	NA	NA	NA	NA	NA	NA	NA	NA	NA	NA	NA	NA	NA	NA	NA
chr11:16877165-16877258/-	25	0	NA	NA	NA	NA	NA	NA	NA	NA	NA	NA	NA	NA	NA	NA	NA	NA	NA	NA	NA	NA	NA	NA	NA	NA	NA	NA	NA	NA
chr11:17981016-17981183/-	NA	NA	NA	NA	NA	NA	NA	NA	93.651	74.483	NA	NA	NA	NA	NA	NA	69.231	50	NA	NA	NA	NA	NA	NA	NA	NA	NA	NA	NA	NA
chr11:18021040-18021119/-	NA	NA	NA	NA	NA	NA	NA	NA	NA	NA	NA	NA	12	3.111	NA	NA	100	5.747	NA	NA	NA	NA	NA	NA	NA	NA	NA	NA	NA	NA
chr11:18305341-18305448/-	NA	NA	NA	NA	NA	NA	100	85.714	NA	NA	NA	NA	NA	NA	NA	NA	NA	NA	NA	NA	NA	NA	NA	NA	NA	NA	NA	NA	NA	NA
chr11:19905839-19905908/+	NA	NA	NA	NA	10.588	0	NA	NA	NA	NA	NA	NA	NA	NA	NA	NA	NA	NA	NA	NA	NA	NA	NA	NA	NA	NA	NA	NA	NA	NA
chr11:20104137-20104146/+	NA	NA	NA	NA	NA	NA	NA	NA	NA	NA	NA	NA	NA	NA	NA	NA	NA	NA	NA	NA	43.333	0	NA	NA	NA	NA	NA	NA	NA	NA
chr11:27393829-27393945/-	100	99.248	NA	NA	NA	NA	NA	NA	NA	NA	NA	NA	NA	NA	NA	NA	NA	NA	NA	NA	NA	NA	NA	NA	NA	NA	NA	NA	NA	NA
chr11:27411467-27412712/-	74.949	0	NA	NA	NA	NA	NA	NA	NA	NA	NA	NA	NA	NA	NA	NA	NA	NA	NA	NA	NA	NA	NA	NA	NA	NA	NA	NA	NA	NA
chr11:27412640-27412712/-	96.764	94.595	98.255	96.594	NA	NA	NA	NA	NA	NA	NA	NA	NA	NA	NA	NA	NA	NA	NA	NA	NA	NA	NA	NA	NA	NA	NA	NA	NA	NA
chr11:28249541-28249701/+	NA	NA	NA	NA	NA	NA	11.728	1.832	NA	NA	NA	NA	NA	NA	NA	NA	NA	NA	NA	NA	NA	NA	NA	NA	NA	NA	NA	NA	25.424	0
chr11:28250417-28250478/+	10.968	0.265	NA	NA	NA	NA	NA	NA	NA	NA	NA	NA	NA	NA	NA	NA	NA	NA	NA	NA	NA	NA	NA	NA	NA	NA	88.235	0	74.118	0
chr11:30526282-30526380/-	NA	NA	NA	NA	31.901	24.611	NA	NA	NA	NA	NA	NA	NA	NA	NA	NA	NA	NA	NA	NA	NA	NA	NA	NA	NA	NA	NA	NA	NA	NA
chr11:30557540-30557597/-	NA	NA	NA	NA	88.382	80.055	NA	NA	NA	NA	NA	NA	NA	NA	NA	NA	NA	NA	NA	NA	NA	NA	NA	NA	NA	NA	NA	NA	NA	NA
chr11:30557540-30557722/-	NA	NA	NA	NA	97.98	93.382	NA	NA	NA	NA	NA	NA	NA	NA	NA	NA	NA	NA	NA	NA	NA	NA	NA	NA	NA	NA	NA	NA	NA	NA
chr11:30562824-30563021/-	NA	NA	NA	NA	0.876	0	NA	NA	NA	NA	NA	NA	NA	NA	NA	NA	NA	NA	NA	NA	NA	NA	NA	NA	NA	NA	NA	NA	NA	NA
chr11:30562920-30578217/-	NA	NA	NA	NA	0.73	0	NA	NA	NA	NA	NA	NA	NA	NA	NA	NA	NA	NA	NA	NA	NA	NA	NA	NA	NA	NA	NA	NA	NA	NA
chr11:30577998-30578217/-	NA	NA	NA	NA	0.667	0	NA	NA	NA	NA	NA	NA	NA	NA	NA	NA	NA	NA	NA	NA	NA	NA	NA	NA	NA	NA	NA	NA	NA	NA
chr11:30591628-30591799/-	NA	NA	NA	NA	1.059	0	NA	NA	NA	NA	NA	NA	NA	NA	NA	NA	NA	NA	NA	NA	NA	NA	NA	NA	NA	NA	NA	NA	NA	NA
chr11:30591704-30591799/-	NA	NA	NA	NA	1.465	0	NA	NA	NA	NA	NA	NA	NA	NA	NA	NA	NA	NA	NA	NA	NA	NA	NA	NA	NA	NA	NA	NA	NA	NA
chr11:3061677-3061811/-	NA	NA	3.963	1.068	NA	NA	NA	NA	NA	NA	NA	NA	NA	NA	NA	NA	NA	NA	NA	NA	NA	NA	NA	NA	NA	NA	NA	NA	NA	NA
chr11:31482172-31482261/-	89.474	47.273	NA	NA	NA	NA	80.541	69.713	100	74.79	NA	NA	92.157	70.85	90	67.315	NA	NA	NA	NA	NA	NA	NA	NA	NA	NA	NA	NA	NA	NA
chr11:31484718-31484852/-	NA	NA	80.488	45.231	NA	NA	100	96.474	NA	NA	NA	NA	100	62.199	NA	NA	NA	NA	NA	NA	NA	NA	NA	NA	NA	NA	NA	NA	NA	NA
chr11:31490162-31491344/-	NA	NA	NA	NA	NA	NA	42.282	0	NA	NA	NA	NA	NA	NA	NA	NA	NA	NA	NA	NA	NA	NA	NA	NA	NA	NA	NA	NA	NA	NA
chr11:31491264-31491344/-	NA	NA	NA	NA	NA	NA	44.516	30.573	NA	NA	NA	NA	NA	NA	NA	NA	NA	NA	NA	NA	NA	NA	NA	NA	NA	NA	NA	NA	NA	NA
chr11:32610557-32610681/+	NA	NA	NA	NA	NA	NA	NA	NA	NA	NA	NA	NA	NA	NA	NA	NA	NA	NA	NA	NA	NA	NA	NA	NA	NA	NA	NA	NA	100	90.7
chr11:32949507-32949669/+	NA	NA	NA	NA	100	92.357	NA	NA	NA	NA	NA	NA	NA	NA	NA	NA	NA	NA	NA	NA	NA	NA	NA	NA	NA	NA	NA	NA	NA	NA
chr11:33358620-33358740/+	100	95.294	NA	NA	NA	NA	NA	NA	NA	NA	NA	NA	NA	NA	NA	NA	NA	NA	NA	NA	NA	NA	NA	NA	NA	NA	NA	NA	NA	NA
chr11:33370067-33370364/+	97.521	92.763	NA	NA	NA	NA	NA	NA	NA	NA	NA	NA	NA	NA	NA	NA	NA	NA	NA	NA	NA	NA	NA	NA	NA	NA	NA	NA	NA	NA
chr11:34104371-34104424/+	NA	NA	NA	NA	NA	NA	100	99.191	NA	NA	NA	NA	NA	NA	NA	NA	NA	NA	NA	NA	NA	NA	NA	NA	NA	NA	NA	NA	NA	NA
chr11:34104501-34104588/+	NA	NA	NA	NA	NA	NA	100	99.296	NA	NA	NA	NA	NA	NA	NA	NA	NA	NA	NA	NA	NA	NA	NA	NA	NA	NA	NA	NA	NA	NA
chr11:34113452-34113603/+	NA	NA	NA	NA	NA	NA	98.979	97.92	NA	NA	NA	NA	NA	NA	NA	NA	NA	NA	NA	NA	NA	NA	NA	NA	NA	NA	NA	NA	NA	NA
chr11:34130288-34130380/+	NA	NA	NA	NA	NA	NA	NA	NA	NA	NA	NA	NA	NA	NA	NA	NA	100	90.845	NA	NA	NA	NA	NA	NA	NA	NA	NA	NA	NA	NA
chr11:34978930-34979130/+	100	90.364	97.043	84.339	NA	NA	NA	NA	NA	NA	NA	NA	NA	NA	NA	NA	NA	NA	99.2	92.253	NA	NA	NA	NA	NA	NA	NA	NA	NA	NA
chr11:34999670-34999729/+	100	83.442	NA	NA	NA	NA	NA	NA	NA	NA	100	89.041	NA	NA	100	92.615	NA	NA	97.917	87.08	NA	NA	NA	NA	NA	NA	NA	NA	NA	NA
chr11:35201820-35201954/+	100	93.691	NA	NA	NA	NA	NA	NA	NA	NA	NA	NA	NA	NA	NA	NA	NA	NA	NA	NA	NA	NA	NA	NA	NA	NA	NA	NA	NA	NA
chr11:35208378-35208447/+	NA	NA	99.912	99.378	NA	NA	NA	NA	NA	NA	NA	NA	NA	NA	NA	NA	NA	NA	NA	NA	NA	NA	NA	NA	NA	NA	NA	NA	NA	NA
chr11:35218292-35218421/+	NA	NA	NA	NA	NA	NA	NA	NA	NA	NA	0.156	0.037	NA	NA	NA	NA	NA	NA	NA	NA	NA	NA	NA	NA	NA	NA	NA	NA	NA	NA
chr11:35219667-35219793/+	NA	NA	NA	NA	NA	NA	NA	NA	NA	NA	NA	NA	100	1.026	NA	NA	NA	NA	NA	NA	NA	NA	NA	NA	NA	NA	NA	NA	NA	NA
chr11:35222628-35222742/+	83.333	5.882	NA	NA	NA	NA	NA	NA	NA	NA	NA	NA	NA	NA	NA	NA	NA	NA	58.974	6.452	NA	NA	NA	NA	NA	NA	NA	NA	NA	NA
chr11:35223214-35223334/+	NA	NA	NA	NA	NA	NA	NA	NA	NA	NA	9.22	0	NA	NA	NA	NA	NA	NA	NA	NA	NA	NA	NA	NA	NA	NA	NA	NA	NA	NA
chr11:35223217-35223334/+	NA	NA	NA	NA	NA	NA	NA	NA	NA	NA	14.53	0	NA	NA	NA	NA	NA	NA	NA	NA	NA	NA	NA	NA	NA	NA	NA	NA	NA	NA
chr11:35226058-35226187/+	0.468	0	NA	NA	NA	NA	NA	NA	NA	NA	1.353	0.765	NA	NA	NA	NA	NA	NA	NA	NA	NA	NA	NA	NA	NA	NA	NA	NA	NA	NA
chr11:35226058-35227790/+	0.575	0	NA	NA	NA	NA	NA	NA	NA	NA	NA	NA	NA	NA	NA	NA	NA	NA	NA	NA	NA	NA	NA	NA	NA	NA	NA	NA	NA	NA
chr11:35227658-35227790/+	NA	NA	NA	NA	NA	NA	NA	NA	NA	NA	54.795	26.154	NA	NA	NA	NA	NA	NA	58.209	31.818	NA	NA	NA	NA	NA	NA	NA	NA	NA	NA
chr11:35227658-35229753/+	NA	NA	NA	NA	NA	NA	NA	NA	NA	NA	98.02	50.943	NA	NA	NA	NA	NA	NA	NA	NA	NA	NA	NA	NA	NA	NA	NA	NA	NA	NA
chr11:35227661-35227790/+	NA	NA	NA	NA	NA	NA	NA	NA	NA	NA	NA	NA	NA	NA	NA	NA	NA	NA	52.542	0	NA	NA	NA	NA	NA	NA	NA	NA	NA	NA
chr11:35227667-35227790/+	NA	NA	NA	NA	NA	NA	NA	NA	NA	NA	NA	NA	NA	NA	96.544	0	NA	NA	NA	NA	NA	NA	NA	NA	NA	NA	NA	NA	NA	NA
chr11:35229651-35229753/+	NA	NA	NA	NA	NA	NA	NA	NA	NA	NA	100	82.143	NA	NA	NA	NA	NA	NA	NA	NA	NA	NA	NA	NA	NA	NA	NA	NA	NA	NA
chr11:35231511-35231601/+	100	0.889	NA	NA	NA	NA	NA	NA	NA	NA	NA	NA	NA	NA	NA	NA	NA	NA	NA	NA	NA	NA	NA	NA	NA	NA	NA	NA	NA	NA
chr11:3721839-3722069/-	97.942	93.988	NA	NA	NA	NA	NA	NA	NA	NA	NA	NA	NA	NA	NA	NA	NA	NA	NA	NA	NA	NA	NA	NA	NA	NA	NA	NA	NA	NA
chr11:3765738-3765879/-	NA	NA	91.36	85.312	NA	NA	NA	NA	NA	NA	NA	NA	NA	NA	NA	NA	NA	NA	NA	NA	NA	NA	NA	NA	NA	NA	NA	NA	NA	NA
chr11:4126835-4126921/+	NA	NA	NA	NA	NA	NA	NA	NA	NA	NA	NA	NA	1.139	0	NA	NA	NA	NA	NA	NA	100	0.974	NA	NA	NA	NA	NA	NA	NA	NA
chr11:4127275-4127317/+	NA	NA	NA	NA	NA	NA	NA	NA	NA	NA	NA	NA	100	98.145	NA	NA	NA	NA	NA	NA	NA	NA	NA	NA	NA	NA	NA	NA	NA	NA
chr11:4127275-4127453/+	NA	NA	NA	NA	NA	NA	NA	NA	NA	NA	NA	NA	100	99.15	NA	NA	NA	NA	NA	NA	NA	NA	NA	NA	NA	NA	NA	NA	NA	NA
chr11:4127406-4127453/+	NA	NA	NA	NA	NA	NA	NA	NA	NA	NA	NA	NA	100	98.592	NA	NA	NA	NA	NA	NA	NA	NA	NA	NA	NA	NA	NA	NA	NA	NA
chr11:43457713-43457884/+	NA	NA	NA	NA	NA	NA	NA	NA	NA	NA	NA	NA	NA	NA	NA	NA	100	91.71	NA	NA	NA	NA	NA	NA	NA	NA	NA	NA	NA	NA
chr11:44146338-44146534/+	NA	NA	NA	NA	NA	NA	NA	NA	NA	NA	100	99.404	NA	NA	NA	NA	NA	NA	NA	NA	NA	NA	NA	NA	NA	NA	NA	NA	NA	NA
chr11:44148365-44148505/+	NA	NA	NA	NA	NA	NA	100	98.249	NA	NA	NA	NA	NA	NA	NA	NA	NA	NA	NA	NA	NA	NA	NA	NA	NA	NA	NA	NA	NA	NA
chr11:46112005-46112132/-	NA	NA	NA	NA	NA	NA	100	27.66	NA	NA	NA	NA	NA	NA	NA	NA	NA	NA	NA	NA	NA	NA	NA	NA	NA	NA	NA	NA	NA	NA
chr11:46529740-46529920/-	83.979	74.242	NA	NA	NA	NA	NA	NA	NA	NA	NA	NA	NA	NA	NA	NA	85.78	73.944	NA	NA	88.3	78.571	NA	NA	NA	NA	NA	NA	NA	NA
chr11:46534276-46534363/-	60.532	43.548	NA	NA	NA	NA	NA	NA	NA	NA	NA	NA	NA	NA	87.709	68.266	NA	NA	NA	NA	NA	NA	NA	NA	NA	NA	NA	NA	76.552	45.238
chr11:46539697-46539976/-	NA	NA	4.762	0	NA	NA	NA	NA	NA	NA	NA	NA	NA	NA	NA	NA	NA	NA	NA	NA	NA	NA	NA	NA	NA	NA	NA	NA	NA	NA
chr11:46774184-46774260/-	99.669	97.93	NA	NA	NA	NA	NA	NA	NA	NA	NA	NA	NA	NA	NA	NA	NA	NA	NA	NA	NA	NA	NA	NA	NA	NA	NA	NA	NA	NA
chr11:46776437-46776617/-	NA	NA	NA	NA	NA	NA	NA	NA	NA	NA	NA	NA	NA	NA	100	98.756	NA	NA	NA	NA	NA	NA	NA	NA	NA	NA	NA	NA	NA	NA
chr11:47194260-47195033/-	NA	NA	NA	NA	NA	NA	NA	NA	100	0	NA	NA	NA	NA	NA	NA	NA	NA	NA	NA	NA	NA	NA	NA	NA	NA	NA	NA	NA	NA
chr11:47194976-47195033/-	NA	NA	NA	NA	NA	NA	NA	NA	100	91.209	NA	NA	NA	NA	NA	NA	NA	NA	NA	NA	NA	NA	NA	NA	NA	NA	NA	NA	NA	NA
chr11:47238408-47238600/+	NA	NA	NA	NA	NA	NA	NA	NA	NA	NA	NA	NA	100	98.57	NA	NA	NA	NA	NA	NA	NA	NA	NA	NA	NA	NA	NA	NA	NA	NA
chr11:47281959-47282226/+	NA	NA	100	93.443	NA	NA	NA	NA	NA	NA	NA	NA	NA	NA	NA	NA	NA	NA	NA	NA	NA	NA	NA	NA	NA	NA	NA	NA	NA	NA
chr11:47283097-47283277/+	NA	NA	92.955	84.164	NA	NA	NA	NA	NA	NA	100	90.083	NA	NA	NA	NA	NA	NA	NA	NA	100	78.205	NA	NA	NA	NA	NA	NA	NA	NA
chr11:47304363-47304520/+	NA	NA	100	97.544	NA	NA	NA	NA	NA	NA	NA	NA	NA	NA	NA	NA	NA	NA	NA	NA	NA	NA	NA	NA	NA	NA	NA	NA	NA	NA
chr11:473894-473977/+	NA	NA	NA	NA	NA	NA	100	88.571	NA	NA	NA	NA	NA	NA	NA	NA	NA	NA	NA	NA	NA	NA	NA	NA	NA	NA	NA	NA	NA	NA
chr11:47505004-47505084/-	100	97.602	100	99.022	NA	NA	NA	NA	NA	NA	NA	NA	NA	NA	NA	NA	NA	NA	NA	NA	NA	NA	NA	NA	NA	NA	NA	NA	NA	NA
chr11:47521004-47521156/-	NA	NA	NA	NA	NA	NA	67.47	45.536	NA	NA	NA	NA	NA	NA	NA	NA	NA	NA	NA	NA	NA	NA	NA	NA	NA	NA	NA	NA	80	45.299
chr11:47647225-47647293/-	100	97.467	NA	NA	NA	NA	NA	NA	NA	NA	NA	NA	NA	NA	NA	NA	NA	NA	NA	NA	NA	NA	NA	NA	NA	NA	NA	NA	NA	NA
chr11:47653205-47653263/-	NA	NA	NA	NA	100	97.972	NA	NA	NA	NA	NA	NA	NA	NA	NA	NA	NA	NA	NA	NA	NA	NA	NA	NA	NA	NA	NA	NA	NA	NA
chr11:47653217-47653263/-	NA	NA	NA	NA	NA	NA	96.279	0	NA	NA	NA	NA	NA	NA	NA	NA	NA	NA	NA	NA	NA	NA	NA	NA	NA	NA	NA	NA	NA	NA
chr11:47753668-47753771/-	NA	NA	NA	NA	NA	NA	NA	NA	NA	NA	NA	NA	NA	NA	NA	NA	NA	NA	NA	NA	NA	NA	NA	NA	71.429	32.484	NA	NA	NA	NA
chr11:47823362-47823482/-	NA	NA	100	98.825	NA	NA	NA	NA	NA	NA	NA	NA	NA	NA	NA	NA	NA	NA	NA	NA	NA	NA	NA	NA	NA	NA	NA	NA	NA	NA
chr11:50279537-50279677/+	NA	NA	NA	NA	15.385	0	NA	NA	NA	NA	NA	NA	NA	NA	NA	NA	NA	NA	NA	NA	NA	NA	NA	NA	NA	NA	NA	NA	NA	NA
chr11:5274485-5274635/-	NA	NA	NA	NA	NA	NA	33.333	0	NA	NA	NA	NA	NA	NA	NA	NA	NA	NA	NA	NA	NA	NA	NA	NA	NA	NA	NA	NA	NA	NA
chr11:57188444-57188537/-	NA	NA	NA	NA	NA	NA	NA	NA	NA	NA	NA	NA	99.412	98.431	NA	NA	NA	NA	NA	NA	NA	NA	NA	NA	NA	NA	NA	NA	NA	NA
chr11:57188769-57188846/-	NA	NA	NA	NA	NA	NA	NA	NA	NA	NA	NA	NA	99.484	98.315	NA	NA	NA	NA	NA	NA	NA	NA	NA	NA	NA	NA	NA	NA	NA	NA
chr11:57258696-57258835/-	NA	NA	NA	NA	NA	NA	NA	NA	NA	NA	100	96.491	NA	NA	NA	NA	NA	NA	100	92.381	NA	NA	NA	NA	NA	NA	NA	NA	NA	NA
chr11:57259063-57259099/-	NA	NA	NA	NA	NA	NA	NA	NA	NA	NA	NA	NA	NA	NA	NA	NA	100	97.776	100	85.629	NA	NA	NA	NA	NA	NA	NA	NA	NA	NA
chr11:57463391-57463515/+	99.326	97.626	NA	NA	NA	NA	100	98.501	NA	NA	NA	NA	NA	NA	NA	NA	NA	NA	NA	NA	NA	NA	NA	NA	NA	NA	NA	NA	NA	NA
chr11:59554509-59554609/+	100	93.056	NA	NA	NA	NA	NA	NA	NA	NA	NA	NA	NA	NA	NA	NA	NA	NA	NA	NA	NA	NA	NA	NA	NA	NA	NA	NA	NA	NA
chr11:61041970-61042056/-	NA	NA	NA	NA	NA	NA	NA	NA	99.029	89.492	NA	NA	NA	NA	NA	NA	NA	NA	NA	NA	NA	NA	NA	NA	NA	NA	NA	NA	NA	NA
chr11:61078939-61079367/-	NA	NA	NA	NA	NA	NA	94.906	0	NA	NA	NA	NA	NA	NA	NA	NA	NA	NA	NA	NA	NA	NA	NA	NA	NA	NA	NA	NA	NA	NA
chr11:61096960-61097056/-	NA	NA	NA	NA	NA	NA	NA	NA	NA	NA	NA	NA	94.5	0	NA	NA	NA	NA	NA	NA	NA	NA	NA	NA	NA	NA	NA	NA	NA	NA
chr11:61124674-61124843/-	NA	NA	NA	NA	NA	NA	NA	NA	NA	NA	NA	NA	100	19.522	NA	NA	NA	NA	NA	NA	NA	NA	NA	NA	NA	NA	NA	NA	NA	NA
chr11:61131904-61131990/+	NA	NA	100	98.25	NA	NA	NA	NA	NA	NA	NA	NA	NA	NA	NA	NA	NA	NA	NA	NA	NA	NA	NA	NA	NA	NA	NA	NA	NA	NA
chr11:61134899-61134997/+	NA	NA	13.12	0	NA	NA	NA	NA	NA	NA	NA	NA	NA	NA	NA	NA	NA	NA	NA	NA	NA	NA	NA	NA	NA	NA	NA	NA	NA	NA
chr11:61134899-61135092/+	NA	NA	12.865	0	NA	NA	NA	NA	NA	NA	NA	NA	NA	NA	NA	NA	NA	NA	NA	NA	NA	NA	NA	NA	NA	NA	NA	NA	NA	NA
chr11:61205096-61205320/+	NA	NA	NA	NA	NA	NA	NA	NA	NA	NA	NA	NA	NA	NA	NA	NA	NA	NA	100	95.862	NA	NA	NA	NA	NA	NA	NA	NA	NA	NA
chr11:61205475-61205585/+	NA	NA	NA	NA	NA	NA	NA	NA	NA	NA	NA	NA	NA	NA	NA	NA	NA	NA	100	93.081	93.197	66.823	NA	NA	NA	NA	NA	NA	NA	NA
chr11:61644337-61644435/-	NA	NA	NA	NA	NA	NA	NA	NA	NA	NA	NA	NA	NA	NA	100	97.687	NA	NA	NA	NA	NA	NA	NA	NA	NA	NA	NA	NA	NA	NA
chr11:61644982-61645059/-	NA	NA	NA	NA	NA	NA	NA	NA	NA	NA	NA	NA	NA	NA	NA	NA	NA	NA	NA	NA	100	99.697	NA	NA	NA	NA	NA	NA	NA	NA
chr11:62303710-62303759/-	3.435	0	NA	NA	NA	NA	NA	NA	NA	NA	1.653	0	NA	NA	NA	NA	NA	NA	NA	NA	NA	NA	NA	NA	NA	NA	NA	NA	NA	NA
chr11:62394519-62394596/-	NA	NA	NA	NA	NA	NA	NA	NA	NA	NA	NA	NA	NA	NA	NA	NA	100	99.69	NA	NA	NA	NA	NA	NA	NA	NA	NA	NA	NA	NA
chr11:62397285-62397429/-	NA	NA	NA	NA	NA	NA	NA	NA	NA	NA	NA	NA	NA	NA	NA	NA	100	99.5	NA	NA	NA	NA	NA	NA	NA	NA	NA	NA	NA	NA
chr11:62406454-62406582/-	98.035	96.455	NA	NA	NA	NA	NA	NA	NA	NA	NA	NA	NA	NA	NA	NA	NA	NA	NA	NA	NA	NA	NA	NA	NA	NA	NA	NA	NA	NA
chr11:62406830-62406939/-	NA	NA	NA	NA	NA	NA	NA	NA	99.765	98.815	NA	NA	NA	NA	NA	NA	NA	NA	NA	NA	NA	NA	NA	NA	NA	NA	NA	NA	NA	NA
chr11:62406839-62406939/-	98.167	0	NA	NA	NA	NA	NA	NA	NA	NA	NA	NA	NA	NA	NA	NA	NA	NA	NA	NA	NA	NA	NA	NA	NA	NA	NA	NA	NA	NA
chr11:62549927-62549991/+	NA	NA	NA	NA	NA	NA	NA	NA	NA	NA	NA	NA	NA	NA	NA	NA	NA	NA	NA	NA	NA	NA	NA	NA	NA	NA	NA	NA	63.636	4.615
chr11:62621489-62621536/-	NA	NA	NA	NA	NA	NA	NA	NA	NA	NA	100	94.904	NA	NA	NA	NA	NA	NA	NA	NA	NA	NA	NA	NA	NA	NA	NA	NA	NA	NA
chr11:62621990-62622023/-	100	98.905	NA	NA	NA	NA	NA	NA	NA	NA	100	97.602	NA	NA	NA	NA	NA	NA	NA	NA	NA	NA	NA	NA	NA	NA	NA	NA	NA	NA
chr11:62622359-62622410/-	NA	NA	NA	NA	NA	NA	92.473	83.871	NA	NA	NA	NA	NA	NA	NA	NA	NA	NA	NA	NA	NA	NA	NA	NA	NA	NA	NA	NA	NA	NA
chr11:62653908-62654040/+	NA	NA	0.205	0	NA	NA	NA	NA	NA	NA	NA	NA	NA	NA	NA	NA	NA	NA	NA	NA	NA	NA	NA	NA	NA	NA	NA	NA	NA	NA
chr11:63519978-63520117/+	NA	NA	NA	NA	NA	NA	99.647	98.277	NA	NA	NA	NA	NA	NA	NA	NA	99.361	98.584	NA	NA	NA	NA	NA	NA	NA	NA	NA	NA	NA	NA
chr11:63521133-63521180/+	NA	NA	NA	NA	NA	NA	100	98.564	NA	NA	NA	NA	NA	NA	NA	NA	100	98.666	NA	NA	NA	NA	NA	NA	NA	NA	NA	NA	NA	NA
chr11:65055186-65055311/+	NA	NA	99.836	99.432	NA	NA	NA	NA	NA	NA	NA	NA	NA	NA	NA	NA	NA	NA	NA	NA	NA	NA	NA	NA	NA	NA	NA	NA	NA	NA
chr11:65062522-65062682/+	3.016	0	NA	NA	NA	NA	NA	NA	NA	NA	NA	NA	NA	NA	NA	NA	NA	NA	NA	NA	NA	NA	NA	NA	NA	NA	NA	NA	NA	NA
chr11:6540829-6541084/+	NA	NA	NA	NA	NA	NA	NA	NA	100	87.952	NA	NA	NA	NA	NA	NA	NA	NA	NA	NA	NA	NA	NA	NA	NA	NA	NA	NA	NA	NA
chr11:6554256-6554414/+	NA	NA	NA	NA	NA	NA	NA	NA	96.825	83.784	NA	NA	NA	NA	NA	NA	NA	NA	NA	NA	NA	NA	NA	NA	NA	NA	NA	NA	NA	NA
chr11:66133901-66134035/-	NA	NA	NA	NA	NA	NA	NA	NA	NA	NA	NA	NA	NA	NA	NA	NA	96.992	81.957	NA	NA	NA	NA	NA	NA	NA	NA	NA	NA	NA	NA
chr11:66136530-66136602/-	NA	NA	NA	NA	NA	NA	100	70.068	NA	NA	NA	NA	NA	NA	NA	NA	100	57.795	NA	NA	NA	NA	NA	NA	NA	NA	NA	NA	NA	NA
chr11:6622155-6622285/-	NA	NA	NA	NA	NA	NA	NA	NA	NA	NA	100	93.939	NA	NA	NA	NA	NA	NA	NA	NA	NA	NA	NA	NA	NA	NA	NA	NA	NA	NA
chr11:66291194-66291353/+	NA	NA	98.693	91.935	NA	NA	NA	NA	NA	NA	NA	NA	NA	NA	NA	NA	NA	NA	NA	NA	NA	NA	NA	NA	NA	NA	NA	NA	NA	NA
chr11:66523823-66523976/+	74.468	36.667	NA	NA	NA	NA	NA	NA	NA	NA	NA	NA	NA	NA	76.119	46.364	NA	NA	NA	NA	NA	NA	NA	NA	NA	NA	NA	NA	NA	NA
chr11:66529549-66529921/+	NA	NA	NA	NA	NA	NA	NA	NA	NA	NA	NA	NA	NA	NA	NA	NA	NA	NA	NA	NA	NA	NA	NA	NA	NA	NA	62.5	9.259	100	13.131
chr11:66555630-66555740/+	NA	NA	100	87.234	NA	NA	NA	NA	NA	NA	NA	NA	NA	NA	NA	NA	NA	NA	NA	NA	NA	NA	NA	NA	NA	NA	NA	NA	NA	NA
chr11:66568501-66568573/+	NA	NA	100	95.181	NA	NA	NA	NA	NA	NA	NA	NA	NA	NA	NA	NA	NA	NA	NA	NA	NA	NA	NA	NA	NA	NA	NA	NA	NA	NA
chr11:66589113-66589235/+	100	90.698	NA	NA	100	95.238	NA	NA	NA	NA	NA	NA	NA	NA	NA	NA	NA	NA	NA	NA	NA	NA	NA	NA	NA	NA	NA	NA	NA	NA
chr11:66590034-66590145/+	NA	NA	NA	NA	NA	NA	NA	NA	97.826	90.374	NA	NA	NA	NA	100	93.711	NA	NA	NA	NA	NA	NA	NA	NA	100	78.082	NA	NA	NA	NA
chr11:66983326-66983420/+	NA	NA	NA	NA	NA	NA	NA	NA	NA	NA	100	95.152	NA	NA	NA	NA	NA	NA	NA	NA	NA	NA	NA	NA	NA	NA	NA	NA	NA	NA
chr11:67351967-67352041/+	NA	NA	NA	NA	NA	NA	NA	NA	NA	NA	NA	NA	NA	NA	NA	NA	99.364	97.525	NA	NA	NA	NA	NA	NA	NA	NA	NA	NA	NA	NA
chr11:67786064-67786106/+	NA	NA	69.634	0	NA	NA	NA	NA	NA	NA	NA	NA	NA	NA	NA	NA	NA	NA	NA	NA	NA	NA	NA	NA	NA	NA	NA	NA	NA	NA
chr11:68132467-68132616/+	NA	NA	NA	NA	NA	NA	NA	NA	2.101	0	NA	NA	NA	NA	NA	NA	NA	NA	NA	NA	NA	NA	NA	NA	NA	NA	NA	NA	NA	NA
chr11:68171690-68171884/+	NA	NA	NA	NA	NA	NA	NA	NA	3.204	1.088	NA	NA	NA	NA	NA	NA	NA	NA	NA	NA	NA	NA	NA	NA	NA	NA	NA	NA	NA	NA
chr11:68282495-68282634/+	NA	NA	2.746	0	NA	NA	NA	NA	NA	NA	NA	NA	5.435	0	NA	NA	NA	NA	NA	NA	NA	NA	NA	NA	NA	NA	25	1.901	22.034	1.46
chr11:68334466-68334634/+	94.545	0	NA	NA	NA	NA	NA	NA	NA	NA	NA	NA	NA	NA	NA	NA	NA	NA	NA	NA	NA	NA	NA	NA	NA	NA	NA	NA	NA	NA
chr11:68343425-68343502/+	NA	NA	100	94.962	NA	NA	NA	NA	NA	NA	NA	NA	NA	NA	NA	NA	NA	NA	NA	NA	NA	NA	NA	NA	NA	NA	NA	NA	NA	NA
chr11:68343425-68343511/+	NA	NA	100	98.367	NA	NA	NA	NA	NA	NA	NA	NA	NA	NA	NA	NA	NA	NA	NA	NA	NA	NA	NA	NA	NA	NA	NA	NA	NA	NA
chr11:68350510-68350597/+	NA	NA	NA	NA	NA	NA	NA	NA	90.299	82.677	NA	NA	NA	NA	NA	NA	NA	NA	NA	NA	NA	NA	NA	NA	NA	NA	NA	NA	100	64.068
chr11:686857-686997/-	NA	NA	NA	NA	NA	NA	NA	NA	NA	NA	100	96.732	NA	NA	NA	NA	NA	NA	NA	NA	NA	NA	NA	NA	NA	NA	NA	NA	NA	NA
chr11:69181510-69181634/+	100	72.414	NA	NA	NA	NA	NA	NA	NA	NA	NA	NA	NA	NA	NA	NA	NA	NA	NA	NA	NA	NA	NA	NA	NA	NA	NA	NA	NA	NA
chr11:69972166-69972301/+	NA	NA	NA	NA	NA	NA	NA	NA	NA	NA	NA	NA	NA	NA	100	97.126	NA	NA	NA	NA	NA	NA	NA	NA	NA	NA	NA	NA	NA	NA
chr11:70194294-70194526/+	NA	NA	100	98.174	NA	NA	NA	NA	NA	NA	NA	NA	NA	NA	NA	NA	NA	NA	NA	NA	NA	NA	NA	NA	NA	NA	NA	NA	NA	NA
chr11:70197099-70197129/+	NA	NA	2.502	0	NA	NA	NA	NA	NA	NA	NA	NA	NA	NA	NA	NA	NA	NA	NA	NA	NA	NA	NA	NA	NA	NA	NA	NA	NA	NA
chr11:70266505-70266616/+	NA	NA	NA	NA	100	98.48	NA	NA	NA	NA	NA	NA	NA	NA	NA	NA	NA	NA	NA	NA	NA	NA	NA	NA	NA	NA	NA	NA	NA	NA
chr11:70267575-70267686/+	NA	NA	NA	NA	NA	NA	NA	NA	NA	NA	NA	NA	NA	NA	NA	NA	NA	NA	86.322	79.646	NA	NA	NA	NA	NA	NA	NA	NA	NA	NA
chr11:70267575-70268698/+	NA	NA	NA	NA	100	70.248	NA	NA	NA	NA	NA	NA	NA	NA	NA	NA	NA	NA	NA	NA	NA	NA	NA	NA	NA	NA	NA	NA	NA	NA
chr11:71188390-71188484/+	NA	NA	9.853	0	NA	NA	NA	NA	NA	NA	NA	NA	NA	NA	NA	NA	NA	NA	NA	NA	NA	NA	NA	NA	NA	NA	NA	NA	NA	NA
chr11:71698049-71698157/+	NA	NA	NA	NA	NA	NA	NA	NA	NA	NA	100	91.696	NA	NA	NA	NA	NA	NA	NA	NA	NA	NA	NA	NA	NA	NA	NA	NA	NA	NA
chr11:720829-720909/+	NA	NA	NA	NA	NA	NA	NA	NA	100	97.914	NA	NA	NA	NA	NA	NA	NA	NA	NA	NA	NA	NA	NA	NA	NA	NA	NA	NA	NA	NA
chr11:73136066-73136093/-	NA	NA	NA	NA	NA	NA	NA	NA	12.791	0.662	NA	NA	NA	NA	NA	NA	NA	NA	NA	NA	NA	NA	NA	NA	NA	NA	NA	NA	NA	NA
chr11:73429657-73429763/-	NA	NA	NA	NA	57.259	46.613	NA	NA	NA	NA	34.047	25.25	NA	NA	NA	NA	NA	NA	NA	NA	NA	NA	NA	NA	NA	NA	NA	NA	NA	NA
chr11:73429657-73429935/-	NA	NA	99.281	97.452	NA	NA	100	95.057	NA	NA	NA	NA	NA	NA	NA	NA	NA	NA	NA	NA	NA	NA	NA	NA	NA	NA	NA	NA	NA	NA
chr11:73429829-73429935/-	NA	NA	55.154	45.891	NA	NA	NA	NA	63.81	56.424	NA	NA	NA	NA	NA	NA	NA	NA	NA	NA	NA	NA	NA	NA	NA	NA	94.737	63.889	91.045	67.206
chr11:74574025-74574066/-	NA	NA	NA	NA	58.159	34.722	NA	NA	NA	NA	NA	NA	NA	NA	76.471	30.973	NA	NA	NA	NA	NA	NA	NA	NA	NA	NA	NA	NA	100	29.032
chr11:74620933-74621057/-	NA	NA	NA	NA	NA	NA	14.286	0	NA	NA	NA	NA	NA	NA	NA	NA	NA	NA	NA	NA	NA	NA	NA	NA	NA	NA	NA	NA	NA	NA
chr11:74638435-74638533/-	NA	NA	NA	NA	NA	NA	73.684	55.665	NA	NA	NA	NA	NA	NA	NA	NA	NA	NA	NA	NA	NA	NA	NA	NA	NA	NA	NA	NA	NA	NA
chr11:74676807-74676968/+	100	95.802	99.074	95.547	NA	NA	NA	NA	NA	NA	NA	NA	NA	NA	NA	NA	NA	NA	NA	NA	NA	NA	NA	NA	NA	NA	NA	NA	NA	NA
chr11:75111737-75111821/+	NA	NA	NA	NA	NA	NA	NA	NA	NA	NA	NA	NA	NA	NA	NA	NA	100	94.064	NA	NA	NA	NA	NA	NA	NA	NA	NA	NA	NA	NA
chr11:75111737-75111868/+	NA	NA	NA	NA	NA	NA	NA	NA	NA	NA	99.824	99.212	NA	NA	NA	NA	99.923	96.474	NA	NA	NA	NA	NA	NA	NA	NA	NA	NA	NA	NA
chr11:76179895-76179941/+	NA	NA	4.091	1.163	NA	NA	NA	NA	NA	NA	NA	NA	NA	NA	NA	NA	NA	NA	NA	NA	9.97	0	NA	NA	NA	NA	NA	NA	NA	NA
chr11:76250642-76250684/+	NA	NA	NA	NA	NA	NA	NA	NA	NA	NA	NA	NA	100	68.306	NA	NA	NA	NA	NA	NA	NA	NA	NA	NA	NA	NA	NA	NA	NA	NA
chr11:76668508-76668630/+	NA	NA	NA	NA	14.685	4.673	NA	NA	NA	NA	NA	NA	NA	NA	NA	NA	NA	NA	NA	NA	NA	NA	NA	NA	NA	NA	NA	NA	NA	NA
chr11:76705199-76705270/+	20	2.804	NA	NA	NA	NA	NA	NA	NA	NA	15.044	0	NA	NA	13.115	3.755	NA	NA	NA	NA	18.841	6.667	NA	NA	NA	NA	NA	NA	NA	NA
chr11:77333544-77333718/-	NA	NA	99.469	96.553	NA	NA	NA	NA	NA	NA	100	97.101	NA	NA	100	98.034	NA	NA	NA	NA	100	96.257	NA	NA	NA	NA	NA	NA	NA	NA
chr11:77823695-77823816/-	NA	NA	NA	NA	NA	NA	NA	NA	100	98.661	NA	NA	NA	NA	NA	NA	NA	NA	NA	NA	NA	NA	NA	NA	NA	NA	NA	NA	NA	NA
chr11:78189483-78189521/-	NA	NA	100	93.644	NA	NA	NA	NA	NA	NA	NA	NA	NA	NA	NA	NA	NA	NA	NA	NA	NA	NA	NA	NA	NA	NA	NA	NA	NA	NA
chr11:78204108-78204241/-	NA	NA	100	89.398	NA	NA	NA	NA	NA	NA	NA	NA	NA	NA	NA	NA	NA	NA	NA	NA	NA	NA	NA	NA	NA	NA	NA	NA	NA	NA
chr11:78574006-78574177/-	NA	NA	NA	NA	90.303	78.495	NA	NA	NA	NA	NA	NA	NA	NA	NA	NA	NA	NA	NA	NA	NA	NA	NA	NA	NA	NA	NA	NA	NA	NA
chr11:82989768-82989872/-	NA	NA	100	93.037	NA	NA	NA	NA	NA	NA	NA	NA	NA	NA	NA	NA	NA	NA	NA	NA	NA	NA	NA	NA	NA	NA	NA	NA	NA	NA
chr11:850287-850367/+	NA	NA	96.491	86.826	NA	NA	NA	NA	NA	NA	NA	NA	NA	NA	NA	NA	NA	NA	NA	NA	NA	NA	NA	NA	NA	NA	NA	NA	NA	NA
chr11:85374222-85374337/-	NA	NA	68.382	32.277	NA	NA	NA	NA	NA	NA	NA	NA	NA	NA	NA	NA	31.148	15.344	NA	NA	NA	NA	NA	NA	NA	NA	NA	NA	NA	NA
chr11:85687665-85687725/-	NA	NA	97.467	93.793	NA	NA	NA	NA	NA	NA	NA	NA	NA	NA	NA	NA	NA	NA	NA	NA	NA	NA	NA	NA	NA	NA	NA	NA	NA	NA
chr11:85689112-85689136/-	NA	NA	83.053	78.819	NA	NA	NA	NA	87.075	73.678	NA	NA	NA	NA	NA	NA	NA	NA	NA	NA	79.696	73.989	NA	NA	NA	NA	NA	NA	NA	NA
chr11:85694908-85695016/-	NA	NA	NA	NA	NA	NA	NA	NA	99.289	98.07	NA	NA	NA	NA	NA	NA	NA	NA	NA	NA	NA	NA	NA	NA	NA	NA	NA	NA	NA	NA
chr11:85701292-85701421/-	NA	NA	NA	NA	NA	NA	25.562	15.09	15.839	7.348	NA	NA	56.338	46.05	NA	NA	NA	NA	NA	NA	NA	NA	NA	NA	NA	NA	NA	NA	NA	NA
chr11:85701292-85701442/-	NA	NA	NA	NA	NA	NA	41.265	25.338	28.966	15.606	NA	NA	73.218	62.946	28.424	25.841	NA	NA	NA	NA	NA	NA	NA	NA	NA	NA	NA	NA	NA	NA
chr11:85711685-85712201/-	NA	NA	99.977	99.739	NA	NA	NA	NA	NA	NA	NA	NA	NA	NA	NA	NA	NA	NA	NA	NA	NA	NA	NA	NA	NA	NA	NA	NA	NA	NA
chr11:85733409-85733512/-	NA	NA	NA	NA	98.99	95.2	NA	NA	NA	NA	NA	NA	NA	NA	NA	NA	NA	NA	100	97.97	NA	NA	NA	NA	NA	NA	NA	NA	NA	NA
chr11:85734458-85734584/-	NA	NA	NA	NA	NA	NA	4.646	1.538	NA	NA	NA	NA	NA	NA	NA	NA	NA	NA	2.238	0	NA	NA	NA	NA	NA	NA	NA	NA	NA	NA
chr11:86158106-86158249/-	100	94.413	NA	NA	NA	NA	NA	NA	NA	NA	NA	NA	NA	NA	NA	NA	NA	NA	NA	NA	NA	NA	NA	NA	NA	NA	NA	NA	NA	NA
chr11:86786678-86786828/+	27.559	0	11.429	0	NA	NA	NA	NA	NA	NA	53.488	0	NA	NA	NA	NA	NA	NA	NA	NA	NA	NA	NA	NA	NA	NA	NA	NA	NA	NA
chr11:86802403-86802437/+	NA	NA	98.718	90.291	NA	NA	NA	NA	NA	NA	NA	NA	NA	NA	NA	NA	NA	NA	NA	NA	NA	NA	NA	NA	NA	NA	NA	NA	NA	NA
chr11:8853102-8853235/-	NA	NA	NA	NA	53.741	29.67	NA	NA	NA	NA	52.836	39.506	NA	NA	NA	NA	NA	NA	NA	NA	NA	NA	NA	NA	NA	NA	NA	NA	62.963	24.138
chr11:89171078-89171176/-	NA	NA	NA	NA	NA	NA	NA	NA	NA	NA	NA	NA	NA	NA	NA	NA	NA	NA	NA	NA	6.563	0	NA	NA	NA	NA	NA	NA	NA	NA
chr11:9173904-9173989/-	NA	NA	NA	NA	NA	NA	100	96.791	NA	NA	NA	NA	NA	NA	NA	NA	NA	NA	NA	NA	NA	NA	NA	NA	NA	NA	NA	NA	NA	NA
chr11:9192173-9192324/-	NA	NA	NA	NA	NA	NA	NA	NA	94.012	82.77	NA	NA	NA	NA	NA	NA	97.16	93.296	NA	NA	NA	NA	NA	NA	NA	NA	NA	NA	NA	NA
chr11:93435941-93436085/+	NA	NA	NA	NA	NA	NA	NA	NA	NA	NA	NA	NA	87.805	66.467	NA	NA	NA	NA	100	56	NA	NA	NA	NA	NA	NA	NA	NA	NA	NA
chr11:93455119-93455216/+	NA	NA	99	93.929	NA	NA	NA	NA	NA	NA	NA	NA	NA	NA	NA	NA	NA	NA	NA	NA	NA	NA	NA	NA	NA	NA	NA	NA	NA	NA
chr11:93488375-93488552/+	NA	NA	NA	NA	100	92.857	NA	NA	NA	NA	NA	NA	NA	NA	NA	NA	NA	NA	NA	NA	NA	NA	NA	NA	NA	NA	NA	NA	NA	NA
chr11:93530700-93530885/+	NA	NA	NA	NA	NA	NA	NA	NA	NA	NA	NA	NA	NA	NA	NA	NA	NA	NA	NA	NA	100	71.429	NA	NA	NA	NA	NA	NA	NA	NA
chr11:93806473-93806605/+	NA	NA	NA	NA	NA	NA	NA	NA	NA	NA	NA	NA	NA	NA	100	99.37	NA	NA	NA	NA	NA	NA	NA	NA	NA	NA	NA	NA	NA	NA
chr11:94530131-94530186/+	NA	NA	NA	NA	NA	NA	NA	NA	NA	NA	NA	NA	NA	NA	NA	NA	NA	NA	NA	NA	NA	NA	NA	NA	NA	NA	NA	NA	11.475	1.996
chr11:9494223-9494316/+	NA	NA	NA	NA	NA	NA	NA	NA	NA	NA	NA	NA	95.122	82.653	NA	NA	NA	NA	NA	NA	NA	NA	NA	NA	NA	NA	NA	NA	NA	NA
chr11:95546095-95546275/+	NA	NA	100	97.2	NA	NA	NA	NA	NA	NA	NA	NA	NA	NA	NA	NA	NA	NA	NA	NA	NA	NA	NA	NA	NA	NA	NA	NA	NA	NA
chr11:95620775-95620848/-	NA	NA	NA	NA	NA	NA	NA	NA	NA	NA	37.453	19.912	NA	NA	NA	NA	NA	NA	NA	NA	NA	NA	NA	NA	NA	NA	NA	NA	NA	NA
chr11:970168-970311/+	NA	NA	NA	NA	NA	NA	NA	NA	NA	NA	100	96.591	NA	NA	NA	NA	NA	NA	NA	NA	NA	NA	NA	NA	NA	NA	NA	NA	NA	NA
chr12:100690539-100690675/+	NA	NA	8.276	0	NA	NA	NA	NA	NA	NA	NA	NA	NA	NA	NA	NA	NA	NA	4.846	0	NA	NA	NA	NA	NA	NA	NA	NA	NA	NA
chr12:101368622-101368667/+	NA	NA	NA	NA	NA	NA	NA	NA	NA	NA	NA	NA	NA	NA	34.694	12.281	NA	NA	NA	NA	NA	NA	NA	NA	NA	NA	NA	NA	NA	NA
chr12:102301963-102302141/+	NA	NA	NA	NA	NA	NA	NA	NA	NA	NA	94.365	88.248	92.615	82.414	NA	NA	NA	NA	NA	NA	NA	NA	NA	NA	NA	NA	NA	NA	NA	NA
chr12:102307906-102308010/+	NA	NA	NA	NA	89.873	0	NA	NA	NA	NA	NA	NA	NA	NA	NA	NA	NA	NA	NA	NA	NA	NA	NA	NA	NA	NA	NA	NA	NA	NA
chr12:102307951-102308010/+	NA	NA	NA	NA	96.195	90.833	NA	NA	NA	NA	95.829	90.942	94.684	87.329	NA	NA	NA	NA	NA	NA	95.108	87.543	NA	NA	NA	NA	NA	NA	NA	NA
chr12:1035961-1036112/-	NA	NA	56.322	9.605	NA	NA	NA	NA	NA	NA	56.522	19.298	NA	NA	NA	NA	NA	NA	NA	NA	NA	NA	NA	NA	NA	NA	NA	NA	NA	NA
chr12:104683243-104684882/+	1.644	0.583	NA	NA	NA	NA	NA	NA	NA	NA	NA	NA	NA	NA	NA	NA	NA	NA	NA	NA	NA	NA	NA	NA	NA	NA	NA	NA	NA	NA
chr12:104683243-104689274/+	0.391	0.149	NA	NA	NA	NA	NA	NA	NA	NA	NA	NA	NA	NA	NA	NA	NA	NA	NA	NA	NA	NA	NA	NA	NA	NA	NA	NA	NA	NA
chr12:104684770-104684882/+	1.51	0.446	NA	NA	NA	NA	NA	NA	NA	NA	NA	NA	NA	NA	NA	NA	NA	NA	NA	NA	NA	NA	NA	NA	NA	NA	NA	NA	NA	NA
chr12:104703536-104703728/+	2.25	0.365	NA	NA	NA	NA	NA	NA	NA	NA	NA	NA	NA	NA	NA	NA	NA	NA	NA	NA	NA	NA	NA	NA	NA	NA	NA	NA	NA	NA
chr12:104703536-104703877/+	2.381	0.513	NA	NA	NA	NA	NA	NA	NA	NA	NA	NA	NA	NA	NA	NA	NA	NA	NA	NA	NA	NA	NA	NA	NA	NA	NA	NA	NA	NA
chr12:105543392-105543527/+	NA	NA	NA	NA	100	94.043	NA	NA	NA	NA	NA	NA	NA	NA	NA	NA	NA	NA	NA	NA	NA	NA	NA	NA	NA	NA	NA	NA	NA	NA
chr12:108006556-108006646/+	99.252	97.966	NA	NA	NA	NA	NA	NA	NA	NA	NA	NA	NA	NA	NA	NA	NA	NA	NA	NA	NA	NA	NA	NA	NA	NA	NA	NA	NA	NA
chr12:108134722-108135037/-	100	96.714	NA	NA	NA	NA	NA	NA	NA	NA	NA	NA	NA	NA	NA	NA	NA	NA	NA	NA	NA	NA	NA	NA	NA	NA	NA	NA	NA	NA
chr12:109046813-109046836/-	3.483	0.297	5.629	0	6.014	0.339	4.617	0.157	NA	NA	9.27	0.476	11.466	0.426	4.274	0.345	NA	NA	7.079	0.301	3.748	1.097	NA	NA	NA	NA	17.73	0	24.059	0.236
chr12:109046813-109046957/-	3.588	0.423	NA	NA	5.701	0.339	5.481	0.236	6.448	1.597	10.411	0.625	14.266	0.585	NA	NA	7.046	0.719	7.079	0.489	4.12	1.392	NA	NA	NA	NA	16.547	0	24.553	0.236
chr12:109051079-109051199/-	100	99.259	NA	NA	NA	NA	NA	NA	NA	NA	NA	NA	NA	NA	100	99.523	NA	NA	NA	NA	NA	NA	NA	NA	NA	NA	NA	NA	NA	NA
chr12:109196097-109196144/-	NA	NA	NA	NA	NA	NA	NA	NA	NA	NA	NA	NA	100	70.213	NA	NA	NA	NA	NA	NA	NA	NA	NA	NA	NA	NA	NA	NA	NA	NA
chr12:109212211-109212334/-	NA	NA	NA	NA	6.101	1.639	NA	NA	NA	NA	NA	NA	NA	NA	NA	NA	NA	NA	NA	NA	NA	NA	NA	NA	NA	NA	NA	NA	NA	NA
chr12:109217033-109217137/-	95.543	85	NA	NA	NA	NA	NA	NA	NA	NA	NA	NA	NA	NA	NA	NA	NA	NA	NA	NA	NA	NA	NA	NA	NA	NA	NA	NA	NA	NA
chr12:109510112-109510155/+	NA	NA	NA	NA	NA	NA	NA	NA	90.698	0	NA	NA	NA	NA	NA	NA	NA	NA	NA	NA	NA	NA	NA	NA	NA	NA	NA	NA	NA	NA
chr12:109955721-109955818/+	8	0	NA	NA	NA	NA	NA	NA	NA	NA	NA	NA	NA	NA	NA	NA	NA	NA	NA	NA	NA	NA	NA	NA	NA	NA	NA	NA	NA	NA
chr12:11036752-11036874/-	NA	NA	38.667	11.475	NA	NA	NA	NA	NA	NA	NA	NA	NA	NA	NA	NA	NA	NA	NA	NA	NA	NA	NA	NA	NA	NA	NA	NA	NA	NA
chr12:110461850-110461917/+	NA	NA	NA	NA	NA	NA	NA	NA	NA	NA	NA	NA	NA	NA	NA	NA	NA	NA	100	96.69	NA	NA	NA	NA	NA	NA	NA	NA	NA	NA
chr12:110468449-110468563/+	NA	NA	NA	NA	NA	NA	100	94.904	NA	NA	NA	NA	NA	NA	NA	NA	NA	NA	NA	NA	NA	NA	NA	NA	NA	NA	NA	NA	NA	NA
chr12:110471601-110471762/+	NA	NA	NA	NA	NA	NA	NA	NA	NA	NA	NA	NA	100	96.308	NA	NA	NA	NA	NA	NA	NA	NA	NA	NA	NA	NA	NA	NA	NA	NA
chr12:110825543-110825697/-	100	98.568	NA	NA	NA	NA	NA	NA	NA	NA	NA	NA	NA	NA	100	97.765	NA	NA	NA	NA	NA	NA	NA	NA	NA	NA	NA	NA	NA	NA
chr12:110826316-110826428/-	NA	NA	NA	NA	NA	NA	NA	NA	100	93.822	NA	NA	NA	NA	100	96.359	NA	NA	NA	NA	NA	NA	NA	NA	NA	NA	NA	NA	NA	NA
chr12:111065734-111066029/+	NA	NA	41.667	2.148	14.583	1.984	NA	NA	NA	NA	NA	NA	NA	NA	NA	NA	NA	NA	NA	NA	13.208	0.893	NA	NA	NA	NA	NA	NA	NA	NA
chr12:111065856-111066029/+	NA	NA	NA	NA	NA	NA	NA	NA	NA	NA	NA	NA	NA	NA	NA	NA	NA	NA	NA	NA	11.538	1.333	NA	NA	NA	NA	NA	NA	NA	NA
chr12:111072200-111072268/+	25	12.849	NA	NA	NA	NA	NA	NA	NA	NA	NA	NA	NA	NA	NA	NA	NA	NA	NA	NA	NA	NA	NA	NA	NA	NA	NA	NA	NA	NA
chr12:11180999-11181111/-	9.639	0.68	NA	NA	NA	NA	NA	NA	NA	NA	NA	NA	NA	NA	NA	NA	NA	NA	NA	NA	NA	NA	NA	NA	NA	NA	NA	NA	NA	NA
chr12:11187380-11187484/-	77.083	35.106	66.061	18.812	52.493	40.271	NA	NA	67.901	38.71	NA	NA	NA	NA	NA	NA	NA	NA	67.033	30.693	NA	NA	NA	NA	NA	NA	56.757	12.5	NA	NA
chr12:111916873-111916906/-	NA	NA	7.914	0	NA	NA	NA	NA	NA	NA	36.156	0	NA	NA	NA	NA	NA	NA	NA	NA	NA	NA	NA	NA	NA	NA	NA	NA	NA	NA
chr12:111953957-111954167/-	NA	NA	90.667	72.093	76.087	65.217	NA	NA	NA	NA	NA	NA	NA	NA	NA	NA	NA	NA	NA	NA	NA	NA	NA	NA	NA	NA	NA	NA	NA	NA
chr12:112119440-112119639/-	NA	NA	NA	NA	NA	NA	NA	NA	NA	NA	NA	NA	NA	NA	NA	NA	NA	NA	100	94.382	NA	NA	NA	NA	NA	NA	NA	NA	NA	NA
chr12:112148076-112148169/+	45.055	19.266	50.617	25.843	NA	NA	NA	NA	72.727	25.373	NA	NA	100	30	NA	NA	NA	NA	NA	NA	NA	NA	NA	NA	NA	NA	NA	NA	NA	NA
chr12:112165765-112165947/+	NA	NA	NA	NA	NA	NA	NA	NA	NA	NA	96.178	88.079	NA	NA	NA	NA	NA	NA	NA	NA	NA	NA	NA	NA	NA	NA	NA	NA	NA	NA
chr12:112167609-112167760/+	94.224	78.238	NA	NA	91.608	80.516	100	71.698	NA	NA	NA	NA	NA	NA	NA	NA	NA	NA	NA	NA	NA	NA	NA	NA	NA	NA	NA	NA	NA	NA
chr12:112220961-112221102/+	NA	NA	NA	NA	100	97.688	NA	NA	NA	NA	NA	NA	NA	NA	NA	NA	NA	NA	NA	NA	NA	NA	NA	NA	NA	NA	NA	NA	NA	NA
chr12:112305375-112305473/+	NA	NA	100	93.86	NA	NA	99.379	95.604	NA	NA	100	90.58	NA	NA	NA	NA	100	95.789	NA	NA	100	95.745	NA	NA	NA	NA	NA	NA	NA	NA
chr12:112308074-112308164/+	NA	NA	NA	NA	NA	NA	NA	NA	NA	NA	NA	NA	NA	NA	NA	NA	NA	NA	NA	NA	NA	NA	NA	NA	100	80.702	NA	NA	100	80.702
chr12:112321384-112321572/+	NA	NA	100	96.448	NA	NA	NA	NA	NA	NA	NA	NA	NA	NA	NA	NA	NA	NA	NA	NA	NA	NA	NA	NA	NA	NA	NA	NA	NA	NA
chr12:112374495-112374634/-	NA	NA	NA	NA	NA	NA	95.506	88.301	100	88.66	NA	NA	NA	NA	NA	NA	NA	NA	NA	NA	NA	NA	NA	NA	NA	NA	NA	NA	NA	NA
chr12:112374545-112374634/-	62.832	0	NA	NA	NA	NA	93.701	0	NA	NA	NA	NA	NA	NA	NA	NA	NA	NA	NA	NA	NA	NA	NA	NA	NA	NA	NA	NA	NA	NA
chr12:112381068-112381173/-	NA	NA	NA	NA	NA	NA	NA	NA	NA	NA	NA	NA	NA	NA	NA	NA	NA	NA	NA	NA	NA	NA	NA	NA	NA	NA	NA	NA	100	80.769
chr12:112416539-112416591/-	18.681	0	NA	NA	NA	NA	NA	NA	NA	NA	NA	NA	NA	NA	NA	NA	NA	NA	NA	NA	NA	NA	NA	NA	NA	NA	NA	NA	NA	NA
chr12:112525486-112525605/-	NA	NA	NA	NA	NA	NA	NA	NA	NA	NA	NA	NA	NA	NA	NA	NA	96.19	82.906	NA	NA	NA	NA	NA	NA	NA	NA	NA	NA	NA	NA
chr12:116406744-116406902/-	100	98.756	NA	NA	NA	NA	NA	NA	NA	NA	NA	NA	NA	NA	NA	NA	NA	NA	NA	NA	NA	NA	NA	NA	NA	NA	NA	NA	NA	NA
chr12:116547578-116547674/-	NA	NA	NA	NA	NA	NA	NA	NA	NA	NA	NA	NA	NA	NA	NA	NA	NA	NA	NA	NA	NA	NA	NA	NA	NA	NA	NA	NA	11.111	0
chr12:116668337-116668427/-	4.251	0	NA	NA	NA	NA	NA	NA	NA	NA	NA	NA	NA	NA	NA	NA	NA	NA	NA	NA	NA	NA	NA	NA	NA	NA	NA	NA	NA	NA
chr12:116674625-116674695/-	21.034	0	NA	NA	16.477	1.053	NA	NA	NA	NA	35.049	0	NA	NA	NA	NA	NA	NA	NA	NA	NA	NA	NA	NA	NA	NA	71.111	0	59.375	0
chr12:116674625-116675078/-	NA	NA	NA	NA	NA	NA	NA	NA	NA	NA	NA	NA	NA	NA	NA	NA	NA	NA	NA	NA	NA	NA	NA	NA	NA	NA	NA	NA	43.218	0
chr12:116674961-116675078/-	1.182	0	NA	NA	NA	NA	2.186	0	NA	NA	NA	NA	NA	NA	NA	NA	NA	NA	NA	NA	NA	NA	NA	NA	NA	NA	NA	NA	2.845	0
chr12:121000747-121000873/+	NA	NA	NA	NA	NA	NA	NA	NA	NA	NA	NA	NA	NA	NA	NA	NA	NA	NA	NA	NA	100	98.012	NA	NA	NA	NA	NA	NA	NA	NA
chr12:121008993-121009094/+	94.484	88.778	NA	NA	NA	NA	NA	NA	NA	NA	97.538	94.684	NA	NA	NA	NA	NA	NA	NA	NA	NA	NA	NA	NA	NA	NA	NA	NA	NA	NA
chr12:121221476-121221555/-	NA	NA	NA	NA	NA	NA	NA	NA	NA	NA	NA	NA	NA	NA	100	98.438	NA	NA	NA	NA	NA	NA	NA	NA	NA	NA	NA	NA	NA	NA
chr12:121222276-121222396/-	NA	NA	NA	NA	NA	NA	NA	NA	NA	NA	NA	NA	NA	NA	100	98.196	NA	NA	NA	NA	NA	NA	NA	NA	NA	NA	NA	NA	NA	NA
chr12:121954271-121954323/-	NA	NA	NA	NA	NA	NA	NA	NA	NA	NA	NA	NA	11.738	7.309	NA	NA	4.348	0	NA	NA	NA	NA	NA	NA	NA	NA	NA	NA	NA	NA
chr12:1221380-1221464/+	NA	NA	100	46.429	NA	NA	NA	NA	NA	NA	100	79.592	NA	NA	NA	NA	NA	NA	NA	NA	NA	NA	NA	NA	NA	NA	NA	NA	NA	NA
chr12:1221380-1221473/+	NA	NA	NA	NA	NA	NA	NA	NA	NA	NA	100	54.545	NA	NA	NA	NA	NA	NA	100	66.667	NA	NA	NA	NA	NA	NA	NA	NA	NA	NA
chr12:1221384-1221464/+	NA	NA	NA	NA	NA	NA	NA	NA	NA	NA	NA	NA	NA	NA	100	0	NA	NA	NA	NA	NA	NA	NA	NA	NA	NA	NA	NA	NA	NA
chr12:122337539-122337751/+	NA	NA	NA	NA	100	96.339	NA	NA	NA	NA	100	95.506	NA	NA	NA	NA	NA	NA	NA	NA	NA	NA	NA	NA	NA	NA	NA	NA	NA	NA
chr12:122337539-122337795/+	NA	NA	100	87.571	100	92.488	NA	NA	NA	NA	NA	NA	NA	NA	NA	NA	NA	NA	NA	NA	NA	NA	NA	NA	NA	NA	NA	NA	NA	NA
chr12:122702812-122702944/-	NA	NA	NA	NA	NA	NA	NA	NA	100	92.34	NA	NA	NA	NA	NA	NA	NA	NA	NA	NA	NA	NA	NA	NA	NA	NA	NA	NA	NA	NA
chr12:123058168-123058292/+	NA	NA	NA	NA	NA	NA	1.138	0	NA	NA	NA	NA	NA	NA	NA	NA	NA	NA	NA	NA	NA	NA	NA	NA	NA	NA	NA	NA	NA	NA
chr12:123071247-123071304/+	NA	NA	100	98.798	NA	NA	NA	NA	NA	NA	NA	NA	NA	NA	NA	NA	NA	NA	NA	NA	NA	NA	NA	NA	NA	NA	NA	NA	NA	NA
chr12:123082277-123082485/+	97.129	91.25	NA	NA	NA	NA	NA	NA	NA	NA	NA	NA	100	93.381	NA	NA	100	96.094	NA	NA	NA	NA	NA	NA	NA	NA	NA	NA	NA	NA
chr12:123082287-123082485/+	NA	NA	NA	NA	NA	NA	NA	NA	NA	NA	NA	NA	100	0	NA	NA	NA	NA	NA	NA	NA	NA	NA	NA	NA	NA	NA	NA	NA	NA
chr12:123661234-123661336/-	NA	NA	100	97.214	NA	NA	100	94.089	NA	NA	NA	NA	NA	NA	NA	NA	NA	NA	NA	NA	NA	NA	NA	NA	NA	NA	NA	NA	NA	NA
chr12:123712009-123712119/-	100	49.593	NA	NA	NA	NA	NA	NA	NA	NA	NA	NA	NA	NA	NA	NA	NA	NA	NA	NA	NA	NA	NA	NA	NA	NA	NA	NA	NA	NA
chr12:123832575-123832680/-	96.237	92.453	NA	NA	NA	NA	NA	NA	NA	NA	NA	NA	NA	NA	NA	NA	NA	NA	98.913	90.667	NA	NA	NA	NA	NA	NA	NA	NA	NA	NA
chr12:123832581-123832680/-	93.103	84.615	NA	NA	NA	NA	NA	NA	NA	NA	NA	NA	NA	NA	NA	NA	NA	NA	97.938	0	NA	NA	NA	NA	NA	NA	NA	NA	NA	NA
chr12:124102304-124102419/+	100	92.05	NA	NA	100	94.619	NA	NA	NA	NA	NA	NA	NA	NA	NA	NA	NA	NA	NA	NA	NA	NA	NA	NA	NA	NA	NA	NA	NA	NA
chr12:124825147-124825297/-	NA	NA	88	14.286	NA	NA	NA	NA	NA	NA	NA	NA	NA	NA	NA	NA	NA	NA	NA	NA	NA	NA	NA	NA	NA	NA	NA	NA	NA	NA
chr12:125279740-125279814/-	NA	NA	NA	NA	NA	NA	NA	NA	100	98.859	NA	NA	NA	NA	NA	NA	NA	NA	NA	NA	NA	NA	NA	NA	NA	NA	NA	NA	NA	NA
chr12:125284669-125284788/-	NA	NA	NA	NA	NA	NA	NA	NA	100	99.201	NA	NA	NA	NA	NA	NA	NA	NA	NA	NA	NA	NA	NA	NA	NA	NA	NA	NA	NA	NA
chr12:125613880-125614006/+	NA	NA	NA	NA	NA	NA	NA	NA	NA	NA	NA	NA	NA	NA	NA	NA	NA	NA	100	88.43	NA	NA	NA	NA	NA	NA	NA	NA	NA	NA
chr12:129294487-129294598/-	NA	NA	100	66.942	NA	NA	NA	NA	NA	NA	NA	NA	NA	NA	NA	NA	NA	NA	NA	NA	NA	NA	NA	NA	NA	NA	NA	NA	NA	NA
chr12:129411649-129411699/+	NA	NA	NA	NA	NA	NA	NA	NA	NA	NA	NA	NA	92.233	82.884	NA	NA	NA	NA	NA	NA	NA	NA	NA	NA	NA	NA	NA	NA	NA	NA
chr12:129411660-129411699/+	NA	NA	NA	NA	NA	NA	NA	NA	NA	NA	NA	NA	86.159	0	NA	NA	NA	NA	NA	NA	NA	NA	NA	NA	NA	NA	NA	NA	NA	NA
chr12:131288707-131289088/-	38.961	13.382	NA	NA	NA	NA	NA	NA	NA	NA	NA	NA	NA	NA	NA	NA	NA	NA	NA	NA	NA	NA	NA	NA	NA	NA	NA	NA	NA	NA
chr12:133393125-133393398/-	NA	NA	NA	NA	100	78.462	94.495	82.734	100	87.097	93.296	78.531	NA	NA	NA	NA	NA	NA	NA	NA	NA	NA	NA	NA	NA	NA	NA	NA	NA	NA
chr12:133393245-133393398/-	NA	NA	NA	NA	NA	NA	NA	NA	100	88.235	NA	NA	NA	NA	NA	NA	NA	NA	NA	NA	NA	NA	NA	NA	NA	NA	NA	NA	NA	NA
chr12:133424670-133424741/-	NA	NA	NA	NA	NA	NA	NA	NA	NA	NA	NA	NA	NA	NA	NA	NA	100	96.687	NA	NA	NA	NA	NA	NA	NA	NA	NA	NA	NA	NA
chr12:133446199-133446384/-	47.561	0	NA	NA	NA	NA	NA	NA	NA	NA	NA	NA	NA	NA	NA	NA	NA	NA	NA	NA	NA	NA	NA	NA	NA	NA	NA	NA	NA	NA
chr12:133446204-133446261/-	68.841	43.969	NA	NA	NA	NA	NA	NA	NA	NA	NA	NA	NA	NA	NA	NA	NA	NA	NA	NA	NA	NA	NA	NA	NA	NA	NA	NA	NA	NA
chr12:133446204-133446384/-	74.328	53.698	NA	NA	NA	NA	NA	NA	NA	NA	NA	NA	NA	NA	NA	NA	NA	NA	NA	NA	NA	NA	NA	NA	NA	NA	NA	NA	NA	NA
chr12:133446204-133446420/-	68.841	46.667	NA	NA	NA	NA	NA	NA	NA	NA	NA	NA	NA	NA	NA	NA	NA	NA	NA	NA	NA	NA	NA	NA	NA	NA	NA	NA	NA	NA
chr12:19443610-19443730/+	NA	NA	NA	NA	NA	NA	NA	NA	NA	NA	NA	NA	NA	NA	NA	NA	8.012	1.739	NA	NA	NA	NA	NA	NA	NA	NA	NA	NA	NA	NA
chr12:19444577-19444631/+	NA	NA	NA	NA	NA	NA	NA	NA	NA	NA	NA	NA	NA	NA	NA	NA	4.969	0	NA	NA	NA	NA	NA	NA	NA	NA	NA	NA	NA	NA
chr12:19500040-19500116/+	NA	NA	NA	NA	NA	NA	NA	NA	NA	NA	NA	NA	NA	NA	NA	NA	NA	NA	NA	NA	NA	NA	NA	NA	NA	NA	NA	NA	37.5	0
chr12:19619681-19619784/+	NA	NA	NA	NA	4.348	0	NA	NA	NA	NA	7.097	0	6.25	0	NA	NA	6.195	0	NA	NA	NA	NA	NA	NA	NA	NA	46.939	0	25.532	0
chr12:20782841-20783061/+	NA	NA	99.858	98.558	NA	NA	NA	NA	NA	NA	NA	NA	NA	NA	NA	NA	NA	NA	NA	NA	NA	NA	NA	NA	NA	NA	NA	NA	NA	NA
chr12:20785010-20786712/+	NA	NA	95.45	91.031	NA	NA	NA	NA	NA	NA	NA	NA	NA	NA	NA	NA	NA	NA	NA	NA	NA	NA	NA	NA	NA	NA	NA	NA	NA	NA
chr12:20786626-20786712/+	NA	NA	97.446	94.475	NA	NA	NA	NA	NA	NA	NA	NA	NA	NA	NA	NA	NA	NA	NA	NA	NA	NA	NA	NA	NA	NA	NA	NA	NA	NA
chr12:22611417-22611489/-	NA	NA	NA	NA	NA	NA	100	22.481	NA	NA	NA	NA	NA	NA	NA	NA	NA	NA	NA	NA	NA	NA	NA	NA	NA	NA	NA	NA	NA	NA
chr12:22643056-22643152/-	100	97.08	NA	NA	NA	NA	NA	NA	NA	NA	NA	NA	NA	NA	NA	NA	NA	NA	NA	NA	NA	NA	NA	NA	NA	NA	NA	NA	NA	NA
chr12:22821531-22821634/+	NA	NA	9.333	0	NA	NA	NA	NA	NA	NA	NA	NA	NA	NA	NA	NA	NA	NA	NA	NA	NA	NA	NA	NA	NA	NA	NA	NA	NA	NA
chr12:22821531-22821656/+	NA	NA	15.353	0	NA	NA	NA	NA	13.978	1.282	NA	NA	NA	NA	NA	NA	NA	NA	NA	NA	NA	NA	NA	NA	NA	NA	NA	NA	61.905	0
chr12:26217430-26218320/+	NA	NA	NA	NA	NA	NA	NA	NA	NA	NA	100	97.942	NA	NA	NA	NA	NA	NA	NA	NA	NA	NA	NA	NA	NA	NA	NA	NA	NA	NA
chr12:26639749-26639866/-	NA	NA	NA	NA	NA	NA	NA	NA	NA	NA	NA	NA	43.396	11.156	NA	NA	NA	NA	NA	NA	NA	NA	NA	NA	NA	NA	NA	NA	NA	NA
chr12:27135705-27135788/-	NA	NA	NA	NA	NA	NA	NA	NA	100	92.063	NA	NA	NA	NA	95.906	91.696	NA	NA	NA	NA	NA	NA	NA	NA	NA	NA	NA	NA	NA	NA
chr12:27135705-27135792/-	NA	NA	100	99.113	NA	NA	NA	NA	100	96.894	NA	NA	NA	NA	98.839	96.78	99.387	97.131	NA	NA	NA	NA	NA	NA	NA	NA	NA	NA	NA	NA
chr12:27136425-27136529/-	NA	NA	NA	NA	NA	NA	NA	NA	NA	NA	NA	NA	NA	NA	2.183	1.267	NA	NA	NA	NA	NA	NA	NA	NA	NA	NA	NA	NA	NA	NA
chr12:27143382-27143560/-	99.7	98.909	NA	NA	NA	NA	NA	NA	NA	NA	NA	NA	99.876	98.231	NA	NA	99.168	97.708	NA	NA	NA	NA	NA	NA	NA	NA	NA	NA	NA	NA
chr12:27148169-27148341/-	NA	NA	NA	NA	NA	NA	NA	NA	NA	NA	NA	NA	NA	NA	NA	NA	100	99.18	NA	NA	NA	NA	NA	NA	NA	NA	NA	NA	NA	NA
chr12:27149674-27149795/-	NA	NA	NA	NA	100	98.42	NA	NA	100	96.995	100	98.283	NA	NA	NA	NA	99.206	95.592	NA	NA	100	98.176	NA	NA	NA	NA	NA	NA	NA	NA
chr12:27152458-27152609/-	NA	NA	NA	NA	NA	NA	NA	NA	NA	NA	NA	NA	NA	NA	NA	NA	97.442	92.797	NA	NA	NA	NA	NA	NA	NA	NA	NA	NA	NA	NA
chr12:27152458-27152699/-	NA	NA	NA	NA	NA	NA	NA	NA	NA	NA	NA	NA	NA	NA	NA	NA	95.798	84.545	NA	NA	NA	NA	NA	NA	NA	NA	NA	NA	NA	NA
chr12:27523061-27523163/+	NA	NA	NA	NA	NA	NA	NA	NA	33.333	5.556	NA	NA	NA	NA	35.664	21.961	NA	NA	NA	NA	100	31.707	NA	NA	NA	NA	66.667	12.621	80.328	16.556
chr12:27529278-27529320/+	NA	NA	NA	NA	NA	NA	NA	NA	NA	NA	NA	NA	NA	NA	NA	NA	NA	NA	100	6.977	NA	NA	NA	NA	NA	NA	NA	NA	100	20
chr12:27529278-27529349/+	NA	NA	NA	NA	NA	NA	NA	NA	NA	NA	NA	NA	NA	NA	NA	NA	NA	NA	17.021	3.614	NA	NA	NA	NA	NA	NA	84.615	2.083	90.909	0.699
chr12:27829996-27830029/+	95.082	88.923	NA	NA	NA	NA	NA	NA	NA	NA	79.021	51.938	NA	NA	NA	NA	NA	NA	NA	NA	NA	NA	NA	NA	NA	NA	NA	NA	NA	NA
chr12:28379072-28379132/+	30.201	7.246	NA	NA	NA	NA	NA	NA	NA	NA	NA	NA	NA	NA	NA	NA	NA	NA	NA	NA	NA	NA	NA	NA	NA	NA	NA	NA	95.455	30.769
chr12:28408513-28408595/+	13.924	4.023	23.962	8.497	NA	NA	NA	NA	55.556	0	25.806	7.865	NA	NA	NA	NA	66.667	32.5	NA	NA	NA	NA	NA	NA	NA	NA	100	29.167	NA	NA
chr12:28408919-28409011/+	NA	NA	NA	NA	5.357	0	NA	NA	NA	NA	NA	NA	NA	NA	NA	NA	NA	NA	NA	NA	NA	NA	NA	NA	NA	NA	NA	NA	NA	NA
chr12:28408934-28409011/+	NA	NA	8.861	0	NA	NA	12.794	0	NA	NA	NA	NA	NA	NA	NA	NA	NA	NA	NA	NA	NA	NA	NA	NA	NA	NA	NA	NA	55	10
chr12:28410134-28410178/+	NA	NA	NA	NA	NA	NA	NA	NA	NA	NA	100	86.667	NA	NA	NA	NA	NA	NA	NA	NA	NA	NA	NA	NA	NA	NA	NA	NA	NA	NA
chr12:28412296-28412375/+	NA	NA	NA	NA	NA	NA	98.729	94.799	NA	NA	NA	NA	100	95.415	NA	NA	NA	NA	NA	NA	NA	NA	NA	NA	NA	NA	NA	NA	NA	NA
chr12:28457558-28457644/+	NA	NA	NA	NA	NA	NA	13.704	7.98	NA	NA	NA	NA	NA	NA	22.137	7.756	NA	NA	NA	NA	NA	NA	NA	NA	NA	NA	NA	NA	21.569	0
chr12:2927271-2927519/+	NA	NA	NA	NA	NA	NA	NA	NA	NA	NA	100	84.375	NA	NA	NA	NA	NA	NA	NA	NA	NA	NA	NA	NA	NA	NA	NA	NA	NA	NA
chr12:29904598-29904805/-	NA	NA	NA	NA	NA	NA	NA	NA	NA	NA	97.895	94.366	NA	NA	NA	NA	NA	NA	97.746	93.049	NA	NA	NA	NA	NA	NA	NA	NA	NA	NA
chr12:31632522-31633189/-	100	97.826	NA	NA	NA	NA	NA	NA	NA	NA	NA	NA	NA	NA	NA	NA	NA	NA	NA	NA	NA	NA	NA	NA	NA	NA	NA	NA	NA	NA
chr12:32863862-32863949/+	100	96.33	NA	NA	NA	NA	NA	NA	NA	NA	NA	NA	NA	NA	NA	NA	NA	NA	NA	NA	NA	NA	NA	NA	NA	NA	NA	NA	NA	NA
chr12:32890798-32890876/+	60.669	41.037	NA	NA	NA	NA	NA	NA	NA	NA	NA	NA	NA	NA	NA	NA	NA	NA	NA	NA	NA	NA	NA	NA	NA	NA	NA	NA	NA	NA
chr12:32996115-32996247/-	NA	NA	NA	NA	NA	NA	NA	NA	NA	NA	NA	NA	NA	NA	100	2.433	NA	NA	NA	NA	NA	NA	NA	NA	NA	NA	NA	NA	NA	NA
chr12:40422409-40422485/-	NA	NA	2.075	0.204	NA	NA	NA	NA	NA	NA	NA	NA	NA	NA	NA	NA	NA	NA	NA	NA	NA	NA	NA	NA	NA	NA	NA	NA	NA	NA
chr12:42748962-42749024/+	NA	NA	NA	NA	100	98.328	NA	NA	NA	NA	NA	NA	NA	NA	NA	NA	NA	NA	NA	NA	NA	NA	NA	NA	NA	NA	NA	NA	NA	NA
chr12:42778701-42778798/+	NA	NA	NA	NA	56.989	0	NA	NA	NA	NA	100	0	NA	NA	NA	NA	NA	NA	NA	NA	NA	NA	NA	NA	NA	NA	NA	NA	NA	NA
chr12:42778741-42778798/+	NA	NA	NA	NA	NA	NA	NA	NA	NA	NA	100	89.053	NA	NA	NA	NA	NA	NA	NA	NA	96.04	82.222	NA	NA	45.833	17.241	NA	NA	56.701	17.241
chr12:46347610-46347640/-	NA	NA	NA	NA	NA	NA	5.19	0	NA	NA	NA	NA	NA	NA	NA	NA	NA	NA	NA	NA	NA	NA	NA	NA	NA	NA	NA	NA	NA	NA
chr12:46347610-46353997/-	NA	NA	NA	NA	NA	NA	5.842	0	NA	NA	NA	NA	NA	NA	NA	NA	NA	NA	NA	NA	NA	NA	NA	NA	NA	NA	NA	NA	NA	NA
chr12:46633461-46633676/-	NA	NA	NA	NA	NA	NA	NA	NA	NA	NA	NA	NA	99.155	96.939	NA	NA	99.327	96.56	NA	NA	NA	NA	NA	NA	NA	NA	NA	NA	NA	NA
chr12:46636982-46637097/-	NA	NA	97.549	94.6	98.295	93.443	NA	NA	NA	NA	NA	NA	NA	NA	NA	NA	NA	NA	NA	NA	NA	NA	NA	NA	NA	NA	NA	NA	NA	NA
chr12:46756803-46756928/-	NA	NA	NA	NA	NA	NA	NA	NA	NA	NA	99.63	99.113	NA	NA	NA	NA	NA	NA	NA	NA	NA	NA	NA	NA	NA	NA	NA	NA	NA	NA
chr12:47606379-47606436/+	84	44.444	NA	NA	NA	NA	NA	NA	NA	NA	NA	NA	NA	NA	NA	NA	NA	NA	NA	NA	NA	NA	NA	NA	NA	NA	NA	NA	NA	NA
chr12:48460709-48460748/-	NA	NA	NA	NA	NA	NA	NA	NA	NA	NA	100	89.744	NA	NA	NA	NA	NA	NA	NA	NA	NA	NA	NA	NA	NA	NA	NA	NA	NA	NA
chr12:48482945-48483076/-	17.11	7.609	19.927	13.906	NA	NA	12.741	3.983	NA	NA	NA	NA	17.021	7.818	NA	NA	NA	NA	NA	NA	NA	NA	NA	NA	NA	NA	NA	NA	NA	NA
chr12:49089781-49089945/-	NA	NA	NA	NA	NA	NA	NA	NA	NA	NA	100	76.852	NA	NA	NA	NA	NA	NA	NA	NA	NA	NA	NA	NA	NA	NA	NA	NA	NA	NA
chr12:49417835-49417883/-	9.137	0	NA	NA	NA	NA	NA	NA	NA	NA	NA	NA	NA	NA	NA	NA	NA	NA	NA	NA	NA	NA	NA	NA	NA	NA	NA	NA	NA	NA
chr12:49523901-49524057/-	100	0.321	NA	NA	NA	NA	NA	NA	NA	NA	NA	NA	NA	NA	NA	NA	NA	NA	NA	NA	NA	NA	NA	NA	NA	NA	NA	NA	NA	NA
chr12:50135739-50135898/+	3.326	1.114	NA	NA	NA	NA	NA	NA	NA	NA	NA	NA	NA	NA	NA	NA	NA	NA	NA	NA	NA	NA	NA	NA	NA	NA	NA	NA	NA	NA
chr12:50400216-50400419/-	97.496	94.099	NA	NA	NA	NA	NA	NA	NA	NA	NA	NA	NA	NA	NA	NA	NA	NA	NA	NA	NA	NA	NA	NA	NA	NA	NA	NA	NA	NA
chr12:50531510-50531603/-	NA	NA	NA	NA	NA	NA	NA	NA	NA	NA	NA	NA	NA	NA	NA	NA	100	92.229	NA	NA	NA	NA	NA	NA	NA	NA	NA	NA	NA	NA
chr12:50532349-50532400/-	NA	NA	NA	NA	NA	NA	NA	NA	NA	NA	NA	NA	NA	NA	NA	NA	100	87.375	NA	NA	NA	NA	NA	NA	NA	NA	NA	NA	NA	NA
chr12:50835372-50835426/+	NA	NA	NA	NA	NA	NA	100	97.217	NA	NA	NA	NA	NA	NA	NA	NA	NA	NA	NA	NA	NA	NA	NA	NA	NA	NA	NA	NA	NA	NA
chr12:50847242-50847455/+	NA	NA	98.966	94.701	NA	NA	NA	NA	NA	NA	NA	NA	NA	NA	NA	NA	NA	NA	NA	NA	NA	NA	NA	NA	NA	NA	NA	NA	NA	NA
chr12:50854917-50855130/+	NA	NA	98.639	93.213	NA	NA	NA	NA	NA	NA	NA	NA	100	90.05	NA	NA	NA	NA	NA	NA	NA	NA	NA	NA	NA	NA	NA	NA	NA	NA
chr12:50867197-50867319/+	100	98.529	NA	NA	NA	NA	NA	NA	NA	NA	NA	NA	NA	NA	NA	NA	NA	NA	NA	NA	NA	NA	NA	NA	NA	NA	NA	NA	NA	NA
chr12:51203238-51203372/+	NA	NA	100	98.604	NA	NA	NA	NA	NA	NA	NA	NA	NA	NA	NA	NA	NA	NA	NA	NA	NA	NA	NA	NA	NA	NA	NA	NA	NA	NA
chr12:51402258-51402407/-	NA	NA	NA	NA	NA	NA	NA	NA	NA	NA	NA	NA	NA	NA	NA	NA	100	97.938	NA	NA	NA	NA	NA	NA	NA	NA	NA	NA	NA	NA
chr12:51445874-51445990/+	NA	NA	NA	NA	NA	NA	45.062	35.325	NA	NA	NA	NA	NA	NA	NA	NA	63.415	23.875	NA	NA	NA	NA	NA	NA	NA	NA	NA	NA	NA	NA
chr12:51445874-51446029/+	NA	NA	NA	NA	NA	NA	100	16.553	100	23.836	NA	NA	100	12.99	NA	NA	NA	NA	NA	NA	NA	NA	NA	NA	NA	NA	NA	NA	NA	NA
chr12:51447560-51447643/+	NA	NA	86.837	79.324	NA	NA	NA	NA	NA	NA	NA	NA	NA	NA	NA	NA	NA	NA	NA	NA	NA	NA	NA	NA	NA	NA	NA	NA	NA	NA
chr12:51449617-51449804/+	100	95.469	92.681	87.348	NA	NA	NA	NA	NA	NA	NA	NA	NA	NA	NA	NA	NA	NA	100	91.235	NA	NA	NA	NA	NA	NA	NA	NA	NA	NA
chr12:51449926-51450028/+	88.889	71.728	78.776	50.814	NA	NA	NA	NA	80.236	63.912	84.554	71.079	NA	NA	NA	NA	93.814	75.287	93.939	74.658	NA	NA	NA	NA	NA	NA	NA	NA	NA	NA
chr12:51449932-51450028/+	NA	NA	65.432	32.471	NA	NA	NA	NA	NA	NA	NA	NA	NA	NA	NA	NA	NA	NA	89.831	57.955	NA	NA	NA	NA	NA	NA	NA	NA	NA	NA
chr12:51634654-51634713/+	NA	NA	NA	NA	NA	NA	NA	NA	NA	NA	NA	NA	NA	NA	98.839	94.633	NA	NA	NA	NA	NA	NA	NA	NA	NA	NA	NA	NA	NA	NA
chr12:52380601-52380726/+	100	93.333	NA	NA	100	90.857	NA	NA	NA	NA	NA	NA	NA	NA	NA	NA	NA	NA	NA	NA	NA	NA	NA	NA	NA	NA	NA	NA	NA	NA
chr12:52633253-52633335/+	0.07	0.012	NA	NA	NA	NA	NA	NA	NA	NA	NA	NA	NA	NA	NA	NA	NA	NA	NA	NA	NA	NA	NA	NA	NA	NA	NA	NA	NA	NA
chr12:5276480-5278440/+	NA	NA	NA	NA	21	0	NA	NA	NA	NA	NA	NA	NA	NA	NA	NA	NA	NA	NA	NA	NA	NA	NA	NA	NA	NA	NA	NA	NA	NA
chr12:5276480-5278469/+	NA	NA	NA	NA	12.222	0	NA	NA	NA	NA	NA	NA	NA	NA	NA	NA	NA	NA	NA	NA	NA	NA	NA	NA	NA	NA	NA	NA	NA	NA
chr12:5278319-5278440/+	NA	NA	NA	NA	17.708	0	NA	NA	NA	NA	NA	NA	NA	NA	NA	NA	NA	NA	NA	NA	NA	NA	NA	NA	NA	NA	NA	NA	NA	NA
chr12:53421565-53421703/+	NA	NA	NA	NA	NA	NA	NA	NA	NA	NA	NA	NA	NA	NA	NA	NA	NA	NA	99.541	99.199	NA	NA	NA	NA	NA	NA	NA	NA	NA	NA
chr12:53708534-53708633/-	90.888	84.826	NA	NA	NA	NA	NA	NA	NA	NA	83.961	78.017	NA	NA	NA	NA	NA	NA	NA	NA	NA	NA	NA	NA	NA	NA	NA	NA	NA	NA
chr12:53858543-53858636/+	NA	NA	64.401	57.379	72.84	69.096	NA	NA	NA	NA	74.148	69.152	NA	NA	NA	NA	NA	NA	NA	NA	NA	NA	NA	NA	NA	NA	NA	NA	NA	NA
chr12:53858543-53858815/+	NA	NA	54.234	44.053	61.874	57.995	NA	NA	NA	NA	63.973	60.103	NA	NA	NA	NA	NA	NA	NA	NA	NA	NA	NA	NA	NA	NA	NA	NA	NA	NA
chr12:53858548-53858815/+	3.21	0.42	NA	NA	NA	NA	NA	NA	NA	NA	NA	NA	NA	NA	NA	NA	NA	NA	NA	NA	NA	NA	NA	NA	NA	NA	NA	NA	NA	NA
chr12:53861588-53861627/+	NA	NA	NA	NA	NA	NA	NA	NA	73.54	67.013	NA	NA	NA	NA	NA	NA	NA	NA	64.141	60.824	NA	NA	NA	NA	NA	NA	NA	NA	NA	NA
chr12:54735989-54736071/+	100	99.712	NA	NA	NA	NA	NA	NA	NA	NA	NA	NA	NA	NA	NA	NA	NA	NA	NA	NA	NA	NA	NA	NA	NA	NA	NA	NA	NA	NA
chr12:54737008-54737100/+	99.003	97.489	99.803	97.002	NA	NA	NA	NA	NA	NA	NA	NA	NA	NA	NA	NA	NA	NA	NA	NA	NA	NA	NA	NA	NA	NA	NA	NA	NA	NA
chr12:54739243-54739299/+	100	99.438	NA	NA	NA	NA	NA	NA	NA	NA	NA	NA	NA	NA	NA	NA	NA	NA	NA	NA	NA	NA	NA	NA	NA	NA	NA	NA	NA	NA
chr12:56552685-56552704/+	NA	NA	NA	NA	NA	NA	NA	NA	0.602	0.208	NA	NA	NA	NA	NA	NA	NA	NA	NA	NA	NA	NA	NA	NA	NA	NA	NA	NA	NA	NA
chr12:56553370-56553406/+	NA	NA	NA	NA	NA	NA	NA	NA	100	97.847	NA	NA	NA	NA	99.532	97.631	NA	NA	NA	NA	NA	NA	NA	NA	NA	NA	NA	NA	NA	NA
chr12:56553370-56553514/+	NA	NA	NA	NA	NA	NA	NA	NA	99.587	98.857	NA	NA	NA	NA	NA	NA	NA	NA	NA	NA	NA	NA	NA	NA	NA	NA	NA	NA	NA	NA
chr12:56553758-56553932/+	NA	NA	NA	NA	NA	NA	NA	NA	NA	NA	NA	NA	NA	NA	100	99.534	NA	NA	NA	NA	NA	NA	NA	NA	NA	NA	NA	NA	NA	NA
chr12:56554409-56554454/+	NA	NA	NA	NA	NA	NA	NA	NA	NA	NA	NA	NA	NA	NA	67.764	64.407	NA	NA	NA	NA	NA	NA	NA	NA	NA	NA	NA	NA	NA	NA
chr12:56566720-56566813/-	NA	NA	NA	NA	30.7	22.286	NA	NA	NA	NA	NA	NA	NA	NA	NA	NA	NA	NA	NA	NA	NA	NA	NA	NA	NA	NA	NA	NA	NA	NA
chr12:56606779-56606861/-	NA	NA	NA	NA	NA	NA	NA	NA	100	8.01	100	5.44	NA	NA	100	6.569	NA	NA	NA	NA	NA	NA	NA	NA	NA	NA	NA	NA	NA	NA
chr12:56606779-56606922/-	NA	NA	NA	NA	NA	NA	NA	NA	NA	NA	NA	NA	NA	NA	14.972	9.768	NA	NA	NA	NA	NA	NA	NA	NA	NA	NA	NA	NA	NA	NA
chr12:56628940-56629110/+	NA	NA	NA	NA	NA	NA	NA	NA	100	95.714	NA	NA	NA	NA	NA	NA	NA	NA	NA	NA	NA	NA	NA	NA	NA	NA	NA	NA	NA	NA
chr12:56742707-56742813/-	NA	NA	NA	NA	NA	NA	NA	NA	NA	NA	NA	NA	NA	NA	NA	NA	NA	NA	100	95.93	NA	NA	NA	NA	NA	NA	NA	NA	NA	NA
chr12:56742707-56742843/-	NA	NA	NA	NA	NA	NA	NA	NA	NA	NA	NA	NA	NA	NA	99.568	92.911	NA	NA	100	97.953	NA	NA	NA	NA	NA	NA	NA	NA	NA	NA
chr12:56742946-56743045/-	NA	NA	NA	NA	100	94.705	NA	NA	NA	NA	98.443	95.561	NA	NA	98.684	89.775	NA	NA	98.939	94.904	NA	NA	NA	NA	NA	NA	NA	NA	NA	NA
chr12:56745075-56745226/-	NA	NA	NA	NA	NA	NA	NA	NA	NA	NA	99.513	98.099	NA	NA	NA	NA	NA	NA	NA	NA	NA	NA	NA	NA	NA	NA	NA	NA	NA	NA
chr12:56745075-56745234/-	NA	NA	NA	NA	NA	NA	NA	NA	NA	NA	NA	NA	NA	NA	99.521	96.859	NA	NA	NA	NA	NA	NA	NA	NA	NA	NA	NA	NA	NA	NA
chr12:56872835-56872931/-	NA	NA	NA	NA	NA	NA	NA	NA	NA	NA	NA	NA	NA	NA	NA	NA	100	71.429	NA	NA	NA	NA	NA	NA	NA	NA	NA	NA	NA	NA
chr12:56962758-56962817/+	NA	NA	NA	NA	NA	NA	NA	NA	NA	NA	NA	NA	NA	NA	98.673	95.64	NA	NA	NA	NA	96.996	93.905	NA	NA	NA	NA	NA	NA	NA	NA
chr12:56974061-56974159/+	NA	NA	12.462	0	NA	NA	NA	NA	NA	NA	3.125	0	NA	NA	NA	NA	NA	NA	NA	NA	NA	NA	NA	NA	NA	NA	NA	NA	NA	NA
chr12:56975842-56975936/+	NA	NA	NA	NA	97.696	94.609	NA	NA	NA	NA	NA	NA	NA	NA	NA	NA	NA	NA	NA	NA	NA	NA	NA	NA	NA	NA	NA	NA	NA	NA
chr12:56998368-56998583/-	NA	NA	NA	NA	100	97.585	NA	NA	NA	NA	NA	NA	NA	NA	NA	NA	NA	NA	NA	NA	NA	NA	NA	NA	NA	NA	NA	NA	NA	NA
chr12:57006798-57007017/-	NA	NA	NA	NA	NA	NA	NA	NA	NA	NA	NA	NA	NA	NA	NA	NA	NA	NA	NA	NA	100	96.85	NA	NA	NA	NA	NA	NA	NA	NA
chr12:57036456-57036615/-	NA	NA	99.975	99.914	NA	NA	NA	NA	NA	NA	NA	NA	NA	NA	NA	NA	NA	NA	NA	NA	NA	NA	NA	NA	NA	NA	NA	NA	NA	NA
chr12:57064058-57064148/-	NA	NA	NA	NA	NA	NA	94.547	91.129	NA	NA	NA	NA	NA	NA	NA	NA	NA	NA	NA	NA	NA	NA	NA	NA	NA	NA	NA	NA	NA	NA
chr12:57493076-57493223/-	NA	NA	NA	NA	NA	NA	NA	NA	NA	NA	NA	NA	NA	NA	NA	NA	NA	NA	NA	NA	100	98.323	NA	NA	NA	NA	NA	NA	NA	NA
chr12:57493549-57493686/-	NA	NA	100	98.658	NA	NA	NA	NA	NA	NA	NA	NA	NA	NA	NA	NA	NA	NA	NA	NA	NA	NA	NA	NA	NA	NA	NA	NA	NA	NA
chr12:57501387-57501526/-	NA	NA	NA	NA	NA	NA	NA	NA	NA	NA	97.802	92.708	NA	NA	NA	NA	NA	NA	NA	NA	NA	NA	NA	NA	NA	NA	NA	NA	NA	NA
chr12:57501441-57501526/-	NA	NA	NA	NA	NA	NA	NA	NA	NA	NA	96.034	0	NA	NA	NA	NA	NA	NA	NA	NA	NA	NA	NA	NA	NA	NA	NA	NA	NA	NA
chr12:57686354-57686450/-	NA	NA	100	70.37	NA	NA	NA	NA	NA	NA	NA	NA	NA	NA	NA	NA	NA	NA	NA	NA	NA	NA	NA	NA	NA	NA	NA	NA	NA	NA
chr12:58220128-58220185/-	NA	NA	NA	NA	99.674	98.827	NA	NA	NA	NA	NA	NA	NA	NA	NA	NA	NA	NA	NA	NA	NA	NA	NA	NA	NA	NA	NA	NA	NA	NA
chr12:58220778-58220906/-	NA	NA	NA	NA	100	91.618	NA	NA	NA	NA	NA	NA	NA	NA	NA	NA	NA	NA	NA	NA	NA	NA	NA	NA	NA	NA	NA	NA	NA	NA
chr12:6131905-6132064/-	NA	NA	NA	NA	NA	NA	NA	NA	NA	NA	NA	NA	NA	NA	NA	NA	NA	NA	NA	NA	99.895	99.772	NA	NA	NA	NA	NA	NA	NA	NA
chr12:62783384-62783479/+	NA	NA	NA	NA	NA	NA	100	99.251	NA	NA	NA	NA	NA	NA	NA	NA	NA	NA	NA	NA	NA	NA	NA	NA	NA	NA	NA	NA	NA	NA
chr12:62959793-62959811/+	NA	NA	100	31.111	NA	NA	NA	NA	NA	NA	NA	NA	NA	NA	NA	NA	NA	NA	NA	NA	NA	NA	NA	NA	NA	NA	NA	NA	NA	NA
chr12:6442902-6443031/-	NA	NA	NA	NA	NA	NA	NA	NA	NA	NA	100	94.007	NA	NA	NA	NA	NA	NA	NA	NA	NA	NA	NA	NA	NA	NA	NA	NA	NA	NA
chr12:6471216-6471407/-	NA	NA	NA	NA	NA	NA	NA	NA	NA	NA	NA	NA	NA	NA	NA	NA	99.589	94.245	NA	NA	NA	NA	NA	NA	NA	NA	NA	NA	NA	NA
chr12:65702308-65702435/+	NA	NA	NA	NA	NA	NA	NA	NA	NA	NA	NA	NA	NA	NA	NA	NA	NA	NA	71.429	54.656	NA	NA	NA	NA	NA	NA	NA	NA	NA	NA
chr12:6781515-6781698/-	19.481	12.183	NA	NA	NA	NA	NA	NA	NA	NA	NA	NA	NA	NA	NA	NA	NA	NA	NA	NA	NA	NA	NA	NA	NA	NA	NA	NA	NA	NA
chr12:6837091-6837167/+	NA	NA	100	93.333	NA	NA	NA	NA	NA	NA	NA	NA	NA	NA	NA	NA	NA	NA	NA	NA	NA	NA	NA	NA	NA	NA	NA	NA	NA	NA
chr12:69045774-69045831/+	NA	NA	NA	NA	NA	NA	NA	NA	NA	NA	NA	NA	100	97.943	NA	NA	NA	NA	NA	NA	NA	NA	NA	NA	NA	NA	NA	NA	NA	NA
chr12:69229608-69229623/+	NA	NA	NA	NA	NA	NA	NA	NA	NA	NA	NA	NA	100	91.273	NA	NA	NA	NA	NA	NA	NA	NA	NA	NA	NA	NA	NA	NA	NA	NA
chr12:69229608-69229764/+	NA	NA	NA	NA	NA	NA	NA	NA	NA	NA	NA	NA	100	95.238	NA	NA	NA	NA	NA	NA	NA	NA	NA	NA	NA	NA	NA	NA	NA	NA
chr12:69651814-69651925/+	NA	NA	NA	NA	NA	NA	NA	NA	NA	NA	NA	NA	NA	NA	NA	NA	13.625	9.783	NA	NA	NA	NA	NA	NA	NA	NA	NA	NA	NA	NA
chr12:70687850-70688074/+	22.039	5.45	17.949	3.03	NA	NA	NA	NA	26.733	6	NA	NA	8.629	3.015	10.917	3.867	19.368	0	6.939	2.229	3.797	0	NA	NA	13.58	0	68.75	0	65.657	0
chr12:70688016-70688074/+	20.736	4.545	19.395	3.797	NA	NA	NA	NA	25.253	6.312	NA	NA	13.876	5.392	13.559	3.761	25	5.528	NA	NA	4.403	0	NA	NA	18.605	3.521	78.723	2.747	75	3.521
chr12:70713077-70713144/+	100	94.538	NA	NA	NA	NA	NA	NA	NA	NA	NA	NA	NA	NA	NA	NA	NA	NA	NA	NA	NA	NA	NA	NA	NA	NA	NA	NA	NA	NA
chr12:70723202-70723350/+	95.806	80.227	97.602	90.922	98.505	90.643	NA	NA	NA	NA	NA	NA	99.448	94.577	NA	NA	NA	NA	97.561	94.019	NA	NA	NA	NA	NA	NA	NA	NA	NA	NA
chr12:70723202-70724249/+	93.5	77.495	95.725	89.644	NA	NA	NA	NA	NA	NA	NA	NA	NA	NA	NA	NA	NA	NA	NA	NA	NA	NA	NA	NA	NA	NA	NA	NA	NA	NA
chr12:70723202-70726626/+	92.992	75	NA	NA	NA	NA	NA	NA	NA	NA	NA	NA	NA	NA	NA	NA	NA	NA	NA	NA	NA	NA	NA	NA	NA	NA	NA	NA	NA	NA
chr12:70724066-70724249/+	NA	NA	NA	NA	98.99	92.837	100	96.146	NA	NA	NA	NA	NA	NA	NA	NA	NA	NA	NA	NA	NA	NA	NA	NA	NA	NA	NA	NA	NA	NA
chr12:70903991-70904064/+	NA	NA	NA	NA	NA	NA	NA	NA	NA	NA	NA	NA	100	74.603	NA	NA	NA	NA	NA	NA	NA	NA	NA	NA	NA	NA	NA	NA	NA	NA
chr12:70906964-70907007/+	NA	NA	NA	NA	NA	NA	NA	NA	NA	NA	NA	NA	100	63.889	NA	NA	NA	NA	NA	NA	NA	NA	NA	NA	NA	NA	NA	NA	NA	NA
chr12:70970161-70970425/-	NA	NA	NA	NA	NA	NA	NA	NA	NA	NA	NA	NA	NA	NA	NA	NA	NA	NA	NA	NA	91.166	87.786	NA	NA	NA	NA	NA	NA	NA	NA
chr12:70970324-70970415/-	NA	NA	NA	NA	NA	NA	NA	NA	NA	NA	NA	NA	NA	NA	NA	NA	NA	NA	NA	NA	23.963	4	NA	NA	NA	NA	NA	NA	NA	NA
chr12:71946852-71947068/+	NA	NA	NA	NA	100	97.389	NA	NA	NA	NA	NA	NA	NA	NA	NA	NA	NA	NA	NA	NA	NA	NA	NA	NA	NA	NA	NA	NA	NA	NA
chr12:76462688-76462724/-	NA	NA	NA	NA	NA	NA	97.073	93.577	NA	NA	NA	NA	NA	NA	NA	NA	NA	NA	NA	NA	NA	NA	NA	NA	NA	NA	NA	NA	NA	NA
chr12:76462688-76462774/-	NA	NA	NA	NA	NA	NA	98.2	96.176	NA	NA	NA	NA	NA	NA	NA	NA	NA	NA	NA	NA	NA	NA	NA	NA	NA	NA	NA	NA	NA	NA
chr12:76853638-76853675/-	NA	NA	NA	NA	NA	NA	34.582	24.58	NA	NA	NA	NA	NA	NA	30.409	17.107	54.301	34.737	NA	NA	NA	NA	NA	NA	NA	NA	NA	NA	66.667	14.676
chr12:76860229-76860268/-	NA	NA	NA	NA	NA	NA	NA	NA	NA	NA	NA	NA	3.704	0.498	NA	NA	NA	NA	NA	NA	NA	NA	NA	NA	NA	NA	NA	NA	NA	NA
chr12:76928013-76928061/-	NA	NA	NA	NA	NA	NA	NA	NA	NA	NA	NA	NA	NA	NA	NA	NA	NA	NA	NA	NA	NA	NA	NA	NA	NA	NA	NA	NA	100	2.941
chr12:77214837-77214947/+	NA	NA	NA	NA	NA	NA	NA	NA	NA	NA	NA	NA	NA	NA	NA	NA	NA	NA	NA	NA	NA	NA	NA	NA	NA	NA	NA	NA	85.185	18.699
chr12:80008314-80008391/-	3.137	0.363	4.516	0	NA	NA	NA	NA	NA	NA	NA	NA	NA	NA	NA	NA	NA	NA	NA	NA	NA	NA	NA	NA	NA	NA	NA	NA	NA	NA
chr12:8813458-8813494/-	NA	NA	NA	NA	NA	NA	NA	NA	NA	NA	NA	NA	NA	NA	100	98.304	NA	NA	NA	NA	NA	NA	NA	NA	NA	NA	NA	NA	NA	NA
chr12:8814642-8814702/-	NA	NA	86.624	84.029	NA	NA	NA	NA	NA	NA	NA	NA	NA	NA	NA	NA	NA	NA	NA	NA	NA	NA	NA	NA	NA	NA	NA	NA	NA	NA
chr12:89861393-89861462/-	100	93.939	NA	NA	NA	NA	NA	NA	NA	NA	NA	NA	NA	NA	NA	NA	NA	NA	NA	NA	NA	NA	NA	NA	NA	NA	NA	NA	NA	NA
chr12:89864137-89864271/-	NA	NA	NA	NA	NA	NA	100	95.169	NA	NA	NA	NA	NA	NA	NA	NA	NA	NA	NA	NA	NA	NA	NA	NA	NA	NA	NA	NA	NA	NA
chr12:938227-938348/+	1.431	0	NA	NA	NA	NA	NA	NA	NA	NA	NA	NA	NA	NA	NA	NA	NA	NA	NA	NA	NA	NA	NA	NA	NA	NA	NA	NA	NA	NA
chr12:93864261-93864366/+	NA	NA	NA	NA	NA	NA	100	1.484	NA	NA	NA	NA	NA	NA	NA	NA	NA	NA	NA	NA	NA	NA	NA	NA	NA	NA	NA	NA	NA	NA
chr12:95425124-95425264/-	95.676	87.328	NA	NA	NA	NA	100	90.854	NA	NA	NA	NA	NA	NA	NA	NA	NA	NA	NA	NA	NA	NA	NA	NA	NA	NA	NA	NA	NA	NA
chr12:95429667-95434373/-	NA	NA	NA	NA	NA	NA	NA	NA	NA	NA	NA	NA	NA	NA	NA	NA	NA	NA	NA	NA	NA	NA	NA	NA	76.471	0	NA	NA	NA	NA
chr12:95434251-95434373/-	89.124	77.838	NA	NA	NA	NA	NA	NA	NA	NA	NA	NA	NA	NA	NA	NA	NA	NA	NA	NA	NA	NA	NA	NA	NA	NA	NA	NA	NA	NA
chr12:95528514-95528602/-	99.638	97.663	NA	NA	NA	NA	NA	NA	NA	NA	NA	NA	NA	NA	NA	NA	NA	NA	NA	NA	NA	NA	NA	NA	NA	NA	NA	NA	NA	NA
chr12:95650325-95650398/+	NA	NA	NA	NA	NA	NA	NA	NA	NA	NA	NA	NA	NA	NA	76.73	67.358	NA	NA	NA	NA	NA	NA	NA	NA	53.333	29.56	NA	NA	NA	NA
chr12:95650925-95651015/+	NA	NA	NA	NA	NA	NA	NA	NA	100	84.536	NA	NA	NA	NA	NA	NA	NA	NA	NA	NA	NA	NA	NA	NA	NA	NA	NA	NA	NA	NA
chr12:95663814-95663964/+	NA	NA	NA	NA	NA	NA	NA	NA	NA	NA	NA	NA	NA	NA	NA	NA	100	95.266	NA	NA	NA	NA	NA	NA	NA	NA	NA	NA	NA	NA
chr12:95663826-95663964/+	NA	NA	NA	NA	NA	NA	NA	NA	NA	NA	NA	NA	NA	NA	NA	NA	100	95.616	NA	NA	NA	NA	NA	NA	NA	NA	NA	NA	NA	NA
chr12:95668521-95668665/+	NA	NA	NA	NA	NA	NA	NA	NA	NA	NA	NA	NA	NA	NA	NA	NA	100	97.488	NA	NA	NA	NA	NA	NA	NA	NA	NA	NA	NA	NA
chr12:95676230-95676420/+	100	0	NA	NA	NA	NA	NA	NA	NA	NA	NA	NA	NA	NA	NA	NA	NA	NA	NA	NA	NA	NA	NA	NA	NA	NA	NA	NA	NA	NA
chr12:95922582-95922778/-	NA	NA	NA	NA	NA	NA	NA	NA	NA	NA	NA	NA	NA	NA	NA	NA	96.744	90.86	100	88.028	NA	NA	NA	NA	NA	NA	NA	NA	NA	NA
chr12:96076482-96076598/-	NA	NA	NA	NA	NA	NA	NA	NA	NA	NA	100	99.657	NA	NA	NA	NA	NA	NA	NA	NA	NA	NA	NA	NA	NA	NA	NA	NA	NA	NA
chr12:96077273-96077487/-	NA	NA	NA	NA	NA	NA	NA	NA	NA	NA	100	99.784	NA	NA	NA	NA	NA	NA	NA	NA	NA	NA	NA	NA	NA	NA	NA	NA	NA	NA
chr12:96114502-96114596/-	0.988	0	NA	NA	NA	NA	NA	NA	NA	NA	0.777	0.376	NA	NA	NA	NA	NA	NA	NA	NA	NA	NA	NA	NA	NA	NA	NA	NA	NA	NA
chr12:97889708-97889834/+	NA	NA	NA	NA	NA	NA	NA	NA	NA	NA	NA	NA	NA	NA	NA	NA	57.191	40.323	NA	NA	NA	NA	NA	NA	NA	NA	NA	NA	NA	NA
chr13:100191699-100191811/+	99.458	97.754	NA	NA	NA	NA	NA	NA	NA	NA	NA	NA	NA	NA	NA	NA	NA	NA	NA	NA	NA	NA	NA	NA	NA	NA	NA	NA	NA	NA
chr13:100191719-100191811/+	99.275	0	NA	NA	NA	NA	NA	NA	NA	NA	NA	NA	NA	NA	NA	NA	NA	NA	NA	NA	NA	NA	NA	NA	NA	NA	NA	NA	NA	NA
chr13:100958004-100958088/+	NA	NA	NA	NA	NA	NA	NA	NA	8.434	1.163	22.124	0	NA	NA	NA	NA	11.364	0	NA	NA	NA	NA	NA	NA	58.14	8.333	32.258	0	43.662	8.333
chr13:101308634-101308722/-	NA	NA	78.834	42.857	NA	NA	NA	NA	NA	NA	NA	NA	NA	NA	100	77.011	NA	NA	NA	NA	NA	NA	NA	NA	NA	NA	NA	NA	NA	NA
chr13:111277536-111277625/+	NA	NA	91.515	84.298	NA	NA	NA	NA	NA	NA	NA	NA	NA	NA	NA	NA	NA	NA	NA	NA	NA	NA	NA	NA	NA	NA	NA	NA	NA	NA
chr13:111279785-111279894/+	NA	NA	NA	NA	NA	NA	96.774	84.821	NA	NA	NA	NA	NA	NA	NA	NA	NA	NA	NA	NA	NA	NA	NA	NA	NA	NA	NA	NA	NA	NA
chr13:111287018-111287123/+	NA	NA	NA	NA	NA	NA	NA	NA	NA	NA	NA	NA	NA	NA	NA	NA	100	95.968	NA	NA	NA	NA	NA	NA	NA	NA	NA	NA	NA	NA
chr13:111862218-111862349/+	NA	NA	NA	NA	NA	NA	NA	NA	NA	NA	93.189	80.315	NA	NA	98.039	76.338	91.549	79.221	NA	NA	NA	NA	NA	NA	NA	NA	NA	NA	NA	NA
chr13:113839798-113839874/-	NA	NA	NA	NA	NA	NA	100	96.44	NA	NA	NA	NA	NA	NA	NA	NA	NA	NA	NA	NA	NA	NA	NA	NA	NA	NA	NA	NA	NA	NA
chr13:113845185-113845289/-	NA	NA	NA	NA	NA	NA	100	92.364	NA	NA	NA	NA	NA	NA	NA	NA	NA	NA	NA	NA	NA	NA	NA	NA	NA	NA	NA	NA	NA	NA
chr13:114154272-114154464/+	NA	NA	NA	NA	100	97.72	NA	NA	NA	NA	NA	NA	NA	NA	NA	NA	NA	NA	NA	NA	NA	NA	NA	NA	NA	NA	NA	NA	NA	NA
chr13:114157810-114157903/+	NA	NA	99.344	96.316	NA	NA	98.765	93.939	NA	NA	NA	NA	NA	NA	100	94.548	NA	NA	NA	NA	NA	NA	NA	NA	NA	NA	NA	NA	NA	NA
chr13:114164552-114164739/+	NA	NA	NA	NA	NA	NA	NA	NA	NA	NA	NA	NA	100	92.701	NA	NA	100	95.238	NA	NA	99.553	98.122	NA	NA	NA	NA	NA	NA	100	94.34
chr13:114164855-114165509/+	NA	NA	NA	NA	NA	NA	NA	NA	NA	NA	1.411	0.241	NA	NA	NA	NA	NA	NA	NA	NA	NA	NA	NA	NA	NA	NA	NA	NA	NA	NA
chr13:114164855-114166302/+	NA	NA	NA	NA	0.614	0	NA	NA	NA	NA	0.915	0.309	NA	NA	NA	NA	NA	NA	NA	NA	NA	NA	NA	NA	NA	NA	NA	NA	NA	NA
chr13:114170357-114170422/+	8.036	2.141	NA	NA	NA	NA	17.241	1.471	NA	NA	2.498	0.207	11.34	0	NA	NA	6.83	0	7.401	0	NA	NA	NA	NA	NA	NA	17.857	0	45.833	1.266
chr13:114173849-114173970/+	10.683	2.946	5.933	0.958	2.091	0	12.717	1.241	NA	NA	5.925	0.345	12.844	0	NA	NA	NA	NA	2.778	0.263	NA	NA	NA	NA	NA	NA	16.364	0	NA	NA
chr13:114173849-114174043/+	11.324	2.34	5.563	0.641	1.986	0	15.877	1.241	NA	NA	6.554	0.31	NA	NA	NA	NA	NA	NA	2.609	0.351	NA	NA	NA	NA	NA	NA	17.857	0	NA	NA
chr13:114173849-114174116/+	14.658	3.096	NA	NA	1.51	0	15.877	2.689	NA	NA	7.051	0.755	14.027	0	NA	NA	NA	NA	4.437	0.351	NA	NA	NA	NA	NA	NA	NA	NA	NA	NA
chr13:114173849-114174189/+	9.593	2.644	2.897	0.641	NA	NA	11.437	1.241	NA	NA	NA	NA	NA	NA	NA	NA	NA	NA	2.098	0.263	NA	NA	NA	NA	NA	NA	13.208	0	NA	NA
chr13:114174093-114174116/+	NA	NA	NA	NA	NA	NA	NA	NA	NA	NA	7.704	0	NA	NA	NA	NA	NA	NA	NA	NA	NA	NA	NA	NA	NA	NA	12.782	0	NA	NA
chr13:114174093-114174189/+	NA	NA	NA	NA	NA	NA	NA	NA	NA	NA	4.658	0	NA	NA	NA	NA	NA	NA	NA	NA	NA	NA	NA	NA	NA	NA	NA	NA	NA	NA
chr13:114174930-114175048/+	NA	NA	NA	NA	NA	NA	NA	NA	100	99.192	NA	NA	NA	NA	NA	NA	NA	NA	NA	NA	NA	NA	NA	NA	NA	NA	NA	NA	100	92.806
chr13:114188359-114188555/+	NA	NA	NA	NA	NA	NA	NA	NA	NA	NA	NA	NA	NA	NA	NA	NA	95.862	84.358	NA	NA	99.206	94.302	NA	NA	NA	NA	NA	NA	NA	NA
chr13:114277494-114277601/+	NA	NA	99.857	98.072	NA	NA	NA	NA	NA	NA	NA	NA	NA	NA	NA	NA	NA	NA	NA	NA	NA	NA	NA	NA	NA	NA	NA	NA	NA	NA
chr13:114285937-114286059/+	NA	NA	96.566	92.105	NA	NA	NA	NA	NA	NA	96.657	92.654	NA	NA	NA	NA	NA	NA	NA	NA	NA	NA	NA	NA	NA	NA	NA	NA	NA	NA
chr13:114821930-114822133/-	NA	NA	NA	NA	NA	NA	NA	NA	NA	NA	19.708	1.873	NA	NA	NA	NA	NA	NA	14.286	1.322	NA	NA	NA	NA	NA	NA	NA	NA	NA	NA
chr13:114821930-114822154/-	NA	NA	45.455	0	NA	NA	NA	NA	NA	NA	25.676	2.239	NA	NA	NA	NA	NA	NA	16.667	2.609	NA	NA	NA	NA	NA	NA	NA	NA	NA	NA
chr13:114822707-114822949/-	NA	NA	63.636	3.226	NA	NA	NA	NA	NA	NA	35.135	2.963	100	5.263	NA	NA	NA	NA	23.288	3.478	NA	NA	NA	NA	NA	NA	NA	NA	31.148	0
chr13:115027361-115027423/+	NA	NA	NA	NA	97.222	92.398	NA	NA	NA	NA	NA	NA	100	90.173	NA	NA	98.519	92.998	NA	NA	NA	NA	NA	NA	NA	NA	NA	NA	NA	NA
chr13:20539359-20539421/+	10.972	4.527	NA	NA	NA	NA	NA	NA	NA	NA	NA	NA	NA	NA	NA	NA	NA	NA	NA	NA	NA	NA	NA	NA	NA	NA	NA	NA	NA	NA
chr13:20636985-20637111/+	NA	NA	NA	NA	NA	NA	NA	NA	NA	NA	NA	NA	NA	NA	NA	NA	100	97.238	NA	NA	NA	NA	NA	NA	NA	NA	NA	NA	NA	NA
chr13:21381595-21381773/-	NA	NA	99.095	93.617	NA	NA	NA	NA	NA	NA	NA	NA	NA	NA	NA	NA	NA	NA	NA	NA	NA	NA	NA	NA	NA	NA	NA	NA	NA	NA
chr13:21429765-21429904/-	100	87.586	NA	NA	NA	NA	NA	NA	NA	NA	NA	NA	NA	NA	NA	NA	NA	NA	NA	NA	NA	NA	NA	NA	NA	NA	NA	NA	NA	NA
chr13:21437107-21437262/-	NA	NA	NA	NA	NA	NA	NA	NA	NA	NA	NA	NA	NA	NA	NA	NA	NA	NA	NA	NA	NA	NA	NA	NA	NA	NA	NA	NA	44.444	16.34
chr13:21956039-21956084/-	NA	NA	NA	NA	NA	NA	NA	NA	NA	NA	NA	NA	NA	NA	32.584	10.565	NA	NA	NA	NA	NA	NA	NA	NA	NA	NA	NA	NA	51.22	15.882
chr13:21964333-21964552/-	NA	NA	NA	NA	NA	NA	100	5.202	NA	NA	NA	NA	NA	NA	NA	NA	NA	NA	NA	NA	NA	NA	NA	NA	NA	NA	NA	NA	NA	NA
chr13:21995199-21995303/-	NA	NA	NA	NA	NA	NA	NA	NA	98.592	88.636	NA	NA	NA	NA	NA	NA	NA	NA	NA	NA	NA	NA	NA	NA	NA	NA	NA	NA	NA	NA
chr13:25030478-25030616/-	NA	NA	NA	NA	100	98.107	NA	NA	NA	NA	NA	NA	100	97.521	NA	NA	NA	NA	NA	NA	NA	NA	NA	NA	NA	NA	NA	NA	NA	NA
chr13:25911073-25911172/+	NA	NA	97.032	92.229	NA	NA	NA	NA	NA	NA	NA	NA	NA	NA	NA	NA	NA	NA	NA	NA	NA	NA	NA	NA	NA	NA	NA	NA	NA	NA
chr13:28771321-28771483/+	NA	NA	NA	NA	NA	NA	NA	NA	NA	NA	NA	NA	39.403	30.749	NA	NA	36.432	26.872	NA	NA	NA	NA	NA	NA	NA	NA	78.571	37.931	81.818	41.722
chr13:28794367-28794515/+	NA	NA	92.446	84.874	NA	NA	NA	NA	NA	NA	NA	NA	NA	NA	NA	NA	NA	NA	100	95.556	NA	NA	NA	NA	NA	NA	NA	NA	NA	NA
chr13:31725745-31725879/-	100	94.657	NA	NA	NA	NA	NA	NA	NA	NA	NA	NA	NA	NA	NA	NA	NA	NA	NA	NA	NA	NA	NA	NA	NA	NA	NA	NA	NA	NA
chr13:31726988-31727088/-	100	97.013	NA	NA	NA	NA	NA	NA	NA	NA	NA	NA	NA	NA	NA	NA	NA	NA	NA	NA	NA	NA	NA	NA	NA	NA	NA	NA	NA	NA
chr13:31797577-31797650/+	NA	NA	NA	NA	NA	NA	NA	NA	NA	NA	NA	NA	NA	NA	NA	NA	NA	NA	NA	NA	NA	NA	NA	NA	NA	NA	NA	NA	21.429	0
chr13:32918694-32918790/+	NA	NA	NA	NA	NA	NA	NA	NA	NA	NA	NA	NA	NA	NA	NA	NA	NA	NA	NA	NA	NA	NA	NA	NA	100	85.507	NA	NA	NA	NA
chr13:33095509-33095586/-	NA	NA	NA	NA	NA	NA	98.039	88.679	NA	NA	NA	NA	NA	NA	NA	NA	NA	NA	NA	NA	NA	NA	NA	NA	NA	NA	NA	NA	NA	NA
chr13:35619083-35619184/+	NA	NA	NA	NA	NA	NA	NA	NA	NA	NA	NA	NA	100	66.667	NA	NA	NA	NA	NA	NA	NA	NA	NA	NA	NA	NA	NA	NA	NA	NA
chr13:35624405-35624532/+	NA	NA	NA	NA	NA	NA	NA	NA	NA	NA	NA	NA	100	65	NA	NA	NA	NA	NA	NA	NA	NA	NA	NA	NA	NA	NA	NA	NA	NA
chr13:36857605-36857646/-	NA	NA	NA	NA	NA	NA	NA	NA	NA	NA	NA	NA	NA	NA	NA	NA	100	66.234	NA	NA	NA	NA	NA	NA	NA	NA	NA	NA	NA	NA
chr13:37441409-37441520/-	NA	NA	NA	NA	NA	NA	NA	NA	90.385	72.941	NA	NA	NA	NA	NA	NA	NA	NA	NA	NA	NA	NA	NA	NA	NA	NA	NA	NA	NA	NA
chr13:37622700-37622736/-	NA	NA	46.539	24.082	NA	NA	85.612	69.167	NA	NA	95.821	83.704	98.507	85.116	95.876	88.691	NA	NA	88.71	78.499	NA	NA	NA	NA	NA	NA	NA	NA	NA	NA
chr13:41836350-41836467/-	NA	NA	84.431	63.478	NA	NA	NA	NA	NA	NA	NA	NA	NA	NA	NA	NA	NA	NA	NA	NA	NA	NA	NA	NA	NA	NA	NA	NA	NA	NA
chr13:42357930-42358037/-	NA	NA	100	92.453	NA	NA	NA	NA	NA	NA	NA	NA	NA	NA	NA	NA	NA	NA	NA	NA	NA	NA	NA	NA	NA	NA	NA	NA	NA	NA
chr13:42483557-42483728/-	NA	NA	NA	NA	NA	NA	NA	NA	NA	NA	NA	NA	NA	NA	NA	NA	NA	NA	NA	NA	NA	NA	NA	NA	NA	NA	27.66	0	26.531	0
chr13:42887182-42887266/+	NA	NA	NA	NA	NA	NA	37.247	28.889	NA	NA	NA	NA	NA	NA	NA	NA	NA	NA	NA	NA	NA	NA	NA	NA	NA	NA	NA	NA	NA	NA
chr13:45769476-45769650/+	NA	NA	NA	NA	NA	NA	NA	NA	NA	NA	NA	NA	NA	NA	NA	NA	NA	NA	NA	NA	NA	NA	NA	NA	NA	NA	NA	NA	6.863	0
chr13:47365480-47365555/-	NA	NA	NA	NA	NA	NA	NA	NA	NA	NA	NA	NA	NA	NA	100	96.031	NA	NA	NA	NA	NA	NA	NA	NA	NA	NA	NA	NA	NA	NA
chr13:49649424-49649500/+	NA	NA	NA	NA	NA	NA	NA	NA	NA	NA	100	98.196	NA	NA	NA	NA	NA	NA	NA	NA	NA	NA	NA	NA	NA	NA	NA	NA	NA	NA
chr13:50603413-50603628/-	NA	NA	NA	NA	NA	NA	75	30.233	NA	NA	NA	NA	NA	NA	NA	NA	NA	NA	NA	NA	NA	NA	NA	NA	NA	NA	NA	NA	NA	NA
chr13:51969435-51969619/-	NA	NA	96.962	92.821	NA	NA	NA	NA	NA	NA	NA	NA	NA	NA	NA	NA	NA	NA	NA	NA	NA	NA	NA	NA	NA	NA	NA	NA	NA	NA
chr13:52249305-52249379/+	NA	NA	NA	NA	100	89.231	NA	NA	NA	NA	NA	NA	NA	NA	NA	NA	NA	NA	NA	NA	NA	NA	NA	NA	NA	NA	NA	NA	NA	NA
chr13:52293333-52293436/+	NA	NA	NA	NA	NA	NA	NA	NA	100	94.309	NA	NA	NA	NA	NA	NA	NA	NA	NA	NA	NA	NA	NA	NA	NA	NA	NA	NA	NA	NA
chr13:52293333-52293484/+	NA	NA	NA	NA	NA	NA	NA	NA	100	96.594	NA	NA	NA	NA	NA	NA	NA	NA	NA	NA	NA	NA	NA	NA	NA	NA	NA	NA	NA	NA
chr13:52293333-52293486/+	NA	NA	NA	NA	NA	NA	NA	NA	NA	NA	NA	NA	NA	NA	NA	NA	97.746	92.188	NA	NA	NA	NA	NA	NA	NA	NA	NA	NA	NA	NA
chr13:52301813-52301926/+	NA	NA	NA	NA	NA	NA	NA	NA	100	96.943	NA	NA	NA	NA	NA	NA	NA	NA	NA	NA	NA	NA	NA	NA	NA	NA	NA	NA	NA	NA
chr13:52301857-52301926/+	NA	NA	NA	NA	NA	NA	NA	NA	100	0	NA	NA	NA	NA	NA	NA	NA	NA	NA	NA	NA	NA	NA	NA	NA	NA	NA	NA	NA	NA
chr13:52313184-52313311/+	NA	NA	NA	NA	NA	NA	NA	NA	NA	NA	NA	NA	NA	NA	100	98.435	NA	NA	NA	NA	NA	NA	NA	NA	NA	NA	NA	NA	NA	NA
chr13:52532446-52532536/-	NA	NA	NA	NA	68.254	40.741	NA	NA	NA	NA	NA	NA	NA	NA	NA	NA	NA	NA	NA	NA	NA	NA	NA	NA	NA	NA	NA	NA	NA	NA
chr13:52534283-52534458/-	NA	NA	NA	NA	100	86.842	100	92.308	NA	NA	NA	NA	NA	NA	NA	NA	NA	NA	NA	NA	NA	NA	NA	NA	NA	NA	NA	NA	NA	NA
chr13:52997708-52997774/-	NA	NA	NA	NA	100	92.78	NA	NA	NA	NA	NA	NA	NA	NA	NA	NA	NA	NA	NA	NA	NA	NA	NA	NA	NA	NA	NA	NA	NA	NA
chr13:61018816-61018882/+	100	87.342	96.8	75.141	NA	NA	NA	NA	NA	NA	NA	NA	NA	NA	NA	NA	NA	NA	NA	NA	NA	NA	NA	NA	NA	NA	NA	NA	NA	NA
chr13:61018820-61018882/+	100	83.607	91.667	66.154	NA	NA	NA	NA	NA	NA	NA	NA	NA	NA	NA	NA	NA	NA	NA	NA	NA	NA	NA	NA	NA	NA	NA	NA	NA	NA
chr13:75915260-75915371/-	NA	NA	NA	NA	NA	NA	NA	NA	NA	NA	NA	NA	NA	NA	NA	NA	NA	NA	NA	NA	99.599	92.241	NA	NA	NA	NA	NA	NA	NA	NA
chr13:76164073-76164265/+	NA	NA	100	1.142	NA	NA	NA	NA	NA	NA	NA	NA	NA	NA	NA	NA	NA	NA	NA	NA	NA	NA	NA	NA	NA	NA	NA	NA	NA	NA
chr13:76301164-76301234/+	NA	NA	NA	NA	NA	NA	NA	NA	NA	NA	NA	NA	NA	NA	NA	NA	NA	NA	100	96.667	NA	NA	NA	NA	NA	NA	NA	NA	NA	NA
chr13:76329933-76330127/+	NA	NA	NA	NA	NA	NA	NA	NA	NA	NA	1.867	0.202	NA	NA	NA	NA	NA	NA	NA	NA	NA	NA	NA	NA	NA	NA	NA	NA	NA	NA
chr13:77703290-77703365/-	NA	NA	NA	NA	NA	NA	27.473	0	NA	NA	NA	NA	NA	NA	NA	NA	NA	NA	NA	NA	NA	NA	NA	NA	NA	NA	NA	NA	NA	NA
chr13:78317150-78317300/+	NA	NA	NA	NA	NA	NA	NA	NA	NA	NA	NA	NA	NA	NA	NA	NA	NA	NA	NA	NA	NA	NA	NA	NA	NA	NA	NA	NA	41.176	12.821
chr13:80107457-80107591/+	NA	NA	NA	NA	NA	NA	NA	NA	NA	NA	NA	NA	NA	NA	100	95.663	NA	NA	NA	NA	NA	NA	NA	NA	NA	NA	NA	NA	NA	NA
chr13:95271403-95271584/+	NA	NA	NA	NA	NA	NA	NA	NA	NA	NA	NA	NA	NA	NA	NA	NA	NA	NA	90.164	73.023	NA	NA	NA	NA	NA	NA	NA	NA	NA	NA
chr13:95840706-95840796/-	NA	NA	100	92.806	NA	NA	NA	NA	NA	NA	NA	NA	NA	NA	NA	NA	NA	NA	NA	NA	NA	NA	NA	NA	NA	NA	NA	NA	NA	NA
chr13:95886863-95887088/-	NA	NA	NA	NA	NA	NA	NA	NA	NA	NA	NA	NA	NA	NA	NA	NA	NA	NA	100	97.353	NA	NA	NA	NA	NA	NA	NA	NA	NA	NA
chr13:96282967-96283067/-	45.133	15.2	NA	NA	NA	NA	NA	NA	NA	NA	NA	NA	NA	NA	NA	NA	31.579	0	NA	NA	NA	NA	NA	NA	NA	NA	NA	NA	NA	NA
chr13:96622365-96622516/-	NA	NA	NA	NA	100	92.857	NA	NA	NA	NA	NA	NA	NA	NA	NA	NA	NA	NA	NA	NA	NA	NA	NA	NA	NA	NA	NA	NA	NA	NA
chr13:96637492-96637591/-	NA	NA	NA	NA	NA	NA	22.449	0	NA	NA	NA	NA	NA	NA	NA	NA	NA	NA	NA	NA	NA	NA	NA	NA	21.429	0	NA	NA	NA	NA
chr13:98009049-98009103/+	NA	NA	45.27	32.039	NA	NA	NA	NA	NA	NA	NA	NA	NA	NA	NA	NA	NA	NA	NA	NA	NA	NA	NA	NA	NA	NA	NA	NA	NA	NA
chr13:99090019-99090112/+	NA	NA	NA	NA	NA	NA	NA	NA	15.837	6.475	NA	NA	NA	NA	NA	NA	NA	NA	NA	NA	NA	NA	NA	NA	NA	NA	NA	NA	NA	NA
chr13:99478125-99478194/-	NA	NA	11.579	0	NA	NA	NA	NA	NA	NA	NA	NA	NA	NA	NA	NA	NA	NA	NA	NA	NA	NA	NA	NA	NA	NA	NA	NA	NA	NA
chr13:99498177-99498245/-	98.876	84.091	NA	NA	NA	NA	NA	NA	NA	NA	NA	NA	NA	NA	NA	NA	NA	NA	NA	NA	NA	NA	NA	NA	NA	NA	NA	NA	NA	NA
chr13:99896168-99896205/+	NA	NA	NA	NA	NA	NA	100	94.677	NA	NA	NA	NA	NA	NA	NA	NA	NA	NA	NA	NA	NA	NA	NA	NA	NA	NA	NA	NA	NA	NA
chr14:100835423-100835595/-	NA	NA	NA	NA	NA	NA	NA	NA	NA	NA	91.482	87.574	NA	NA	NA	NA	NA	NA	NA	NA	NA	NA	NA	NA	NA	NA	NA	NA	NA	NA
chr14:101297352-101297431/+	NA	NA	NA	NA	NA	NA	NA	NA	NA	NA	100	5.994	NA	NA	NA	NA	NA	NA	NA	NA	NA	NA	NA	NA	NA	NA	NA	NA	NA	NA
chr14:101297352-101297871/+	NA	NA	NA	NA	NA	NA	NA	NA	NA	NA	NA	NA	NA	NA	NA	NA	NA	NA	92.593	67.857	NA	NA	NA	NA	NA	NA	NA	NA	NA	NA
chr14:101297757-101297871/+	NA	NA	NA	NA	NA	NA	NA	NA	NA	NA	NA	NA	NA	NA	NA	NA	NA	NA	91.667	71.585	NA	NA	NA	NA	NA	NA	NA	NA	NA	NA
chr14:101298848-101298978/+	NA	NA	NA	NA	NA	NA	NA	NA	NA	NA	49.254	28.205	NA	NA	NA	NA	NA	NA	NA	NA	NA	NA	NA	NA	NA	NA	NA	NA	NA	NA
chr14:101443271-101444059/+	NA	NA	NA	NA	NA	NA	NA	NA	NA	NA	25.758	0	NA	NA	NA	NA	NA	NA	NA	NA	NA	NA	NA	NA	NA	NA	NA	NA	NA	NA
chr14:101443941-101444031/+	NA	NA	NA	NA	NA	NA	NA	NA	NA	NA	36.416	4	NA	NA	NA	NA	NA	NA	NA	NA	NA	NA	NA	NA	NA	NA	NA	NA	NA	NA
chr14:102372738-102372866/+	NA	NA	NA	NA	100	97.944	NA	NA	NA	NA	NA	NA	NA	NA	NA	NA	NA	NA	NA	NA	NA	NA	NA	NA	NA	NA	NA	NA	NA	NA
chr14:102746984-102747161/-	62.5	1.887	NA	NA	NA	NA	NA	NA	NA	NA	NA	NA	NA	NA	NA	NA	NA	NA	NA	NA	NA	NA	NA	NA	NA	NA	NA	NA	NA	NA
chr14:102797958-102798183/+	NA	NA	NA	NA	100	89.552	NA	NA	NA	NA	NA	NA	NA	NA	NA	NA	NA	NA	NA	NA	NA	NA	NA	NA	NA	NA	NA	NA	NA	NA
chr14:102898132-102898465/+	100	90.625	NA	NA	NA	NA	NA	NA	NA	NA	NA	NA	NA	NA	NA	NA	NA	NA	NA	NA	NA	NA	NA	NA	NA	NA	NA	NA	NA	NA
chr14:103352525-103352606/+	98.399	91.852	100	91.765	NA	NA	NA	NA	NA	NA	NA	NA	97.898	95	100	94.752	NA	NA	NA	NA	NA	NA	NA	NA	NA	NA	NA	NA	NA	NA
chr14:103352525-103355971/+	NA	NA	NA	NA	NA	NA	NA	NA	NA	NA	NA	NA	98.046	94.56	NA	NA	NA	NA	NA	NA	NA	NA	NA	NA	NA	NA	NA	NA	NA	NA
chr14:103355896-103355971/+	97.534	88.601	NA	NA	98.916	94.595	NA	NA	NA	NA	NA	NA	NA	NA	100	93.082	NA	NA	NA	NA	NA	NA	NA	NA	NA	NA	NA	NA	NA	NA
chr14:103357661-103357754/+	99.14	84.677	98.113	90.323	100	94.152	NA	NA	NA	NA	NA	NA	NA	NA	100	95.918	NA	NA	NA	NA	NA	NA	NA	NA	NA	NA	NA	NA	NA	NA
chr14:103363597-103363738/+	NA	NA	NA	NA	NA	NA	NA	NA	NA	NA	NA	NA	100	96.407	NA	NA	NA	NA	NA	NA	NA	NA	NA	NA	NA	NA	NA	NA	NA	NA
chr14:103474808-103474892/-	NA	NA	NA	NA	100	96.206	NA	NA	NA	NA	NA	NA	NA	NA	NA	NA	NA	NA	NA	NA	NA	NA	NA	NA	NA	NA	NA	NA	NA	NA
chr14:103925063-103925132/+	NA	NA	NA	NA	4.348	0	4.835	0.775	NA	NA	NA	NA	5.147	0	NA	NA	NA	NA	NA	NA	NA	NA	NA	NA	NA	NA	NA	NA	45.455	0.339
chr14:103931893-103932130/+	NA	NA	NA	NA	NA	NA	NA	NA	NA	NA	NA	NA	100	96.226	NA	NA	NA	NA	NA	NA	NA	NA	NA	NA	NA	NA	NA	NA	NA	NA
chr14:105911754-105911848/+	96.983	90.625	NA	NA	NA	NA	NA	NA	NA	NA	NA	NA	NA	NA	NA	NA	NA	NA	NA	NA	NA	NA	NA	NA	NA	NA	NA	NA	NA	NA
chr14:105911754-105915746/+	94.924	85.149	NA	NA	NA	NA	NA	NA	NA	NA	NA	NA	NA	NA	NA	NA	NA	NA	NA	NA	NA	NA	NA	NA	NA	NA	NA	NA	NA	NA
chr14:105960171-105960270/+	NA	NA	NA	NA	NA	NA	NA	NA	100	81.818	NA	NA	NA	NA	NA	NA	NA	NA	NA	NA	NA	NA	NA	NA	NA	NA	NA	NA	NA	NA
chr14:21699116-21699231/-	NA	NA	100	99.752	NA	NA	NA	NA	NA	NA	NA	NA	NA	NA	NA	NA	NA	NA	NA	NA	NA	NA	NA	NA	NA	NA	NA	NA	NA	NA
chr14:21699155-21699231/-	NA	NA	100	99.84	NA	NA	NA	NA	NA	NA	NA	NA	NA	NA	NA	NA	NA	NA	NA	NA	NA	NA	NA	NA	NA	NA	NA	NA	NA	NA
chr14:21704531-21704619/-	NA	NA	NA	NA	NA	NA	100	0.222	NA	NA	NA	NA	NA	NA	NA	NA	NA	NA	NA	NA	NA	NA	NA	NA	NA	NA	NA	NA	NA	NA
chr14:21730759-21730857/-	NA	NA	3.052	1.873	NA	NA	NA	NA	NA	NA	NA	NA	NA	NA	NA	NA	NA	NA	NA	NA	NA	NA	NA	NA	NA	NA	NA	NA	NA	NA
chr14:21730759-21730927/-	100	0.822	3.19	2.029	NA	NA	100	0.472	NA	NA	NA	NA	NA	NA	NA	NA	100	8.555	NA	NA	NA	NA	NA	NA	NA	NA	NA	NA	NA	NA
chr14:21731469-21731495/-	NA	NA	NA	NA	NA	NA	NA	NA	NA	NA	NA	NA	NA	NA	NA	NA	81.875	68.434	NA	NA	NA	NA	NA	NA	NA	NA	NA	NA	NA	NA
chr14:22869444-22869575/-	NA	NA	NA	NA	NA	NA	NA	NA	NA	NA	NA	NA	100	55	NA	NA	NA	NA	NA	NA	NA	NA	NA	NA	NA	NA	NA	NA	NA	NA
chr14:23377541-23377589/-	NA	NA	NA	NA	NA	NA	18.421	10.306	NA	NA	NA	NA	NA	NA	NA	NA	NA	NA	NA	NA	NA	NA	NA	NA	NA	NA	NA	NA	NA	NA
chr14:23377541-23377608/-	NA	NA	100	16.491	NA	NA	NA	NA	NA	NA	NA	NA	NA	NA	NA	NA	NA	NA	NA	NA	NA	NA	NA	NA	NA	NA	NA	NA	NA	NA
chr14:23378691-23378774/-	99.063	94.737	NA	NA	NA	NA	NA	NA	NA	NA	NA	NA	NA	NA	NA	NA	NA	NA	NA	NA	NA	NA	NA	NA	NA	NA	NA	NA	NA	NA
chr14:23378691-23378804/-	98.632	95.604	NA	NA	NA	NA	NA	NA	NA	NA	NA	NA	NA	NA	NA	NA	NA	NA	NA	NA	NA	NA	NA	NA	NA	NA	NA	NA	NA	NA
chr14:23395714-23396023/-	100	99.255	NA	NA	NA	NA	NA	NA	NA	NA	NA	NA	NA	NA	NA	NA	NA	NA	NA	NA	NA	NA	NA	NA	NA	NA	NA	NA	NA	NA
chr14:23395910-23396023/-	100	99.383	NA	NA	NA	NA	NA	NA	NA	NA	NA	NA	NA	NA	NA	NA	NA	NA	NA	NA	NA	NA	NA	NA	NA	NA	NA	NA	NA	NA
chr14:23420763-23420898/-	NA	NA	NA	NA	NA	NA	NA	NA	NA	NA	100	90.444	NA	NA	NA	NA	NA	NA	NA	NA	100	87.556	NA	NA	NA	NA	NA	NA	NA	NA
chr14:23559190-23559310/-	NA	NA	NA	NA	NA	NA	NA	NA	NA	NA	NA	NA	NA	NA	NA	NA	NA	NA	NA	NA	NA	NA	NA	NA	NA	NA	NA	NA	65.217	33.025
chr14:24700857-24700943/-	NA	NA	52.91	5.526	NA	NA	NA	NA	NA	NA	NA	NA	NA	NA	NA	NA	NA	NA	NA	NA	NA	NA	NA	NA	NA	NA	NA	NA	NA	NA
chr14:31113085-31113224/+	10.189	4.397	NA	NA	NA	NA	10.582	1.989	6.726	2.564	6.533	0	100	2.867	12.236	1.622	12.037	5.181	7.263	1.892	NA	NA	NA	NA	NA	NA	NA	NA	NA	NA
chr14:31348016-31348150/+	NA	NA	NA	NA	NA	NA	NA	NA	NA	NA	NA	NA	NA	NA	NA	NA	100	94.595	NA	NA	NA	NA	NA	NA	NA	NA	NA	NA	NA	NA
chr14:31382729-31382863/-	100	95.699	NA	NA	NA	NA	NA	NA	NA	NA	NA	NA	NA	NA	NA	NA	NA	NA	NA	NA	NA	NA	NA	NA	NA	NA	NA	NA	NA	NA
chr14:31597817-31598513/-	NA	NA	NA	NA	NA	NA	NA	NA	NA	NA	NA	NA	98.298	95.142	NA	NA	100	93.488	NA	NA	NA	NA	NA	NA	NA	NA	NA	NA	NA	NA
chr14:31597817-31598654/-	NA	NA	NA	NA	NA	NA	NA	NA	NA	NA	NA	NA	98.431	95.322	NA	NA	100	93.966	NA	NA	NA	NA	NA	NA	NA	NA	NA	NA	NA	NA
chr14:31771500-31771725/-	NA	NA	96.734	93.585	NA	NA	NA	NA	NA	NA	NA	NA	NA	NA	NA	NA	NA	NA	NA	NA	NA	NA	NA	NA	NA	NA	NA	NA	NA	NA
chr14:31774110-31774383/-	NA	NA	100	98.493	NA	NA	NA	NA	NA	NA	NA	NA	NA	NA	NA	NA	NA	NA	NA	NA	NA	NA	NA	NA	NA	NA	NA	NA	NA	NA
chr14:31778139-31778388/-	NA	NA	99.851	97.565	NA	NA	NA	NA	NA	NA	NA	NA	NA	NA	NA	NA	NA	NA	NA	NA	NA	NA	NA	NA	NA	NA	NA	NA	NA	NA
chr14:31784975-31785155/-	NA	NA	98.163	96.017	NA	NA	NA	NA	NA	NA	NA	NA	NA	NA	NA	NA	NA	NA	NA	NA	NA	NA	NA	NA	NA	NA	NA	NA	NA	NA
chr14:35073340-35073380/-	100	0.955	NA	NA	NA	NA	NA	NA	NA	NA	NA	NA	NA	NA	NA	NA	NA	NA	NA	NA	NA	NA	NA	NA	NA	NA	NA	NA	NA	NA
chr14:35073340-35073474/-	16.239	1.693	33.333	2.619	NA	NA	NA	NA	62.963	2.532	9.434	1.863	NA	NA	NA	NA	NA	NA	NA	NA	21.519	0	NA	NA	NA	NA	NA	NA	NA	NA
chr14:35255331-35255427/-	NA	NA	86.147	61.775	NA	NA	NA	NA	NA	NA	NA	NA	NA	NA	NA	NA	NA	NA	NA	NA	NA	NA	NA	NA	NA	NA	NA	NA	NA	NA
chr14:37688757-37688896/+	82.569	61.538	NA	NA	NA	NA	NA	NA	NA	NA	NA	NA	NA	NA	NA	NA	NA	NA	NA	NA	NA	NA	NA	NA	NA	NA	NA	NA	NA	NA
chr14:39516570-39516642/-	NA	NA	100	2.361	NA	NA	NA	NA	NA	NA	5.263	2.289	NA	NA	NA	NA	NA	NA	NA	NA	3.817	1.643	NA	NA	NA	NA	NA	NA	NA	NA
chr14:39524346-39524448/-	NA	NA	100	98.179	NA	NA	NA	NA	NA	NA	NA	NA	NA	NA	NA	NA	NA	NA	NA	NA	NA	NA	NA	NA	NA	NA	NA	NA	NA	NA
chr14:39524346-39524500/-	NA	NA	100	99.057	NA	NA	NA	NA	NA	NA	NA	NA	NA	NA	NA	NA	NA	NA	NA	NA	NA	NA	NA	NA	NA	NA	NA	NA	NA	NA
chr14:39532527-39532617/-	NA	NA	NA	NA	NA	NA	NA	NA	NA	NA	100	99.65	NA	NA	NA	NA	NA	NA	NA	NA	NA	NA	NA	NA	NA	NA	NA	NA	NA	NA
chr14:39790131-39790260/+	NA	NA	51.335	40.879	NA	NA	NA	NA	62.597	49.138	78.744	62.712	NA	NA	NA	NA	NA	NA	NA	NA	NA	NA	NA	NA	NA	NA	NA	NA	NA	NA
chr14:45478115-45478348/+	100	87.931	NA	NA	NA	NA	NA	NA	NA	NA	NA	NA	NA	NA	NA	NA	NA	NA	NA	NA	NA	NA	NA	NA	NA	NA	NA	NA	NA	NA
chr14:45492112-45492176/+	50	26.316	67.901	39.474	NA	NA	NA	NA	NA	NA	NA	NA	NA	NA	74.359	34.694	NA	NA	NA	NA	NA	NA	NA	NA	NA	NA	NA	NA	NA	NA
chr14:45516103-45516227/+	NA	NA	NA	NA	NA	NA	55.556	21.739	NA	NA	NA	NA	NA	NA	NA	NA	NA	NA	NA	NA	NA	NA	NA	NA	NA	NA	NA	NA	NA	NA
chr14:45565626-45565695/+	NA	NA	NA	NA	NA	NA	100	25.926	NA	NA	NA	NA	NA	NA	64.912	29.242	NA	NA	NA	NA	NA	NA	NA	NA	NA	NA	NA	NA	100	35.593
chr14:45565626-45565961/+	NA	NA	NA	NA	NA	NA	NA	NA	NA	NA	NA	NA	NA	NA	70.526	49.035	NA	NA	NA	NA	NA	NA	NA	NA	NA	NA	NA	NA	NA	NA
chr14:45565798-45565961/+	73.077	54.386	NA	NA	NA	NA	NA	NA	NA	NA	NA	NA	NA	NA	NA	NA	NA	NA	NA	NA	NA	NA	NA	NA	NA	NA	NA	NA	NA	NA
chr14:45706374-45706522/-	NA	NA	44	2.105	NA	NA	NA	NA	NA	NA	NA	NA	NA	NA	NA	NA	NA	NA	NA	NA	NA	NA	NA	NA	NA	NA	NA	NA	NA	NA
chr14:52160072-52160145/+	NA	NA	NA	NA	NA	NA	NA	NA	NA	NA	1.073	0	NA	NA	NA	NA	NA	NA	NA	NA	NA	NA	NA	NA	NA	NA	NA	NA	NA	NA
chr14:52939603-52939705/-	NA	NA	NA	NA	NA	NA	NA	NA	33.333	4.762	NA	NA	NA	NA	NA	NA	NA	NA	NA	NA	NA	NA	NA	NA	NA	NA	NA	NA	NA	NA
chr14:53128010-53128022/-	NA	NA	100	95.97	NA	NA	NA	NA	NA	NA	NA	NA	NA	NA	NA	NA	NA	NA	NA	NA	NA	NA	NA	NA	NA	NA	NA	NA	NA	NA
chr14:55203741-55204005/+	NA	NA	NA	NA	NA	NA	NA	NA	NA	NA	64.933	55.274	NA	NA	NA	NA	NA	NA	NA	NA	NA	NA	NA	NA	NA	NA	NA	NA	NA	NA
chr14:59929527-59939808/-	42.593	0	NA	NA	NA	NA	NA	NA	NA	NA	NA	NA	NA	NA	NA	NA	NA	NA	NA	NA	NA	NA	NA	NA	NA	NA	NA	NA	NA	NA
chr14:61453769-61453875/+	NA	NA	NA	NA	NA	NA	NA	NA	NA	NA	NA	NA	NA	NA	NA	NA	NA	NA	100	7.653	NA	NA	NA	NA	NA	NA	NA	NA	NA	NA
chr14:67454652-67454724/+	NA	NA	NA	NA	6.794	0	NA	NA	NA	NA	NA	NA	NA	NA	NA	NA	NA	NA	NA	NA	NA	NA	NA	NA	NA	NA	NA	NA	NA	NA
chr14:67768688-67768835/+	NA	NA	NA	NA	NA	NA	NA	NA	84.516	49.02	NA	NA	NA	NA	NA	NA	NA	NA	NA	NA	NA	NA	NA	NA	NA	NA	NA	NA	NA	NA
chr14:68156928-68157138/-	NA	NA	NA	NA	NA	NA	NA	NA	NA	NA	NA	NA	100	98.615	NA	NA	NA	NA	100	98.289	NA	NA	NA	NA	NA	NA	NA	NA	NA	NA
chr14:69349589-69349772/-	NA	NA	NA	NA	NA	NA	NA	NA	100	99.534	NA	NA	NA	NA	NA	NA	NA	NA	NA	NA	NA	NA	NA	NA	NA	NA	NA	NA	NA	NA
chr14:70467412-70467460/+	NA	NA	9.259	1.823	NA	NA	NA	NA	NA	NA	NA	NA	NA	NA	NA	NA	NA	NA	NA	NA	NA	NA	NA	NA	NA	NA	NA	NA	NA	NA
chr14:71455268-71455416/+	61.905	17.51	NA	NA	NA	NA	NA	NA	NA	NA	NA	NA	NA	NA	NA	NA	NA	NA	NA	NA	NA	NA	NA	NA	NA	NA	NA	NA	NA	NA
chr14:71455283-71455416/+	75.853	32.911	79.351	42.249	79.305	68.902	NA	NA	74	57.676	88.241	76.959	42.729	33.144	80.102	71.472	72.532	63.746	84.766	65.806	NA	NA	NA	NA	NA	NA	NA	NA	NA	NA
chr14:71455286-71455416/+	NA	NA	NA	NA	NA	NA	NA	NA	NA	NA	82.494	63.504	NA	NA	NA	NA	NA	NA	75.352	43.915	NA	NA	NA	NA	NA	NA	NA	NA	NA	NA
chr14:71462457-71462560/+	62.725	20	67.937	29.961	57.767	44.167	NA	NA	NA	NA	80.37	59.028	NA	NA	NA	NA	NA	NA	73.091	40.102	NA	NA	NA	NA	NA	NA	NA	NA	100	38.824
chr14:71462457-71462642/+	70.686	39.241	74.976	40.397	NA	NA	NA	NA	73.09	53.191	84.557	71.905	52.754	37.838	NA	NA	NA	NA	78.613	63.914	NA	NA	NA	NA	NA	NA	NA	NA	95.745	61.481
chr14:71476350-71476441/+	NA	NA	NA	NA	NA	NA	NA	NA	NA	NA	NA	NA	99.041	95.299	NA	NA	NA	NA	NA	NA	NA	NA	NA	NA	NA	NA	NA	NA	NA	NA
chr14:71476350-71478266/+	NA	NA	NA	NA	NA	NA	NA	NA	NA	NA	NA	NA	99.407	96.929	NA	NA	NA	NA	NA	NA	NA	NA	NA	NA	NA	NA	NA	NA	NA	NA
chr14:71518605-71518729/+	93.514	0	NA	NA	NA	NA	NA	NA	NA	NA	NA	NA	NA	NA	NA	NA	NA	NA	NA	NA	NA	NA	NA	NA	NA	NA	NA	NA	NA	NA
chr14:71524225-71524441/+	NA	NA	NA	NA	NA	NA	NA	NA	NA	NA	NA	NA	NA	NA	NA	NA	NA	NA	100	93.305	NA	NA	NA	NA	NA	NA	NA	NA	NA	NA
chr14:71880664-71880731/+	NA	NA	NA	NA	NA	NA	NA	NA	NA	NA	NA	NA	100	80	NA	NA	NA	NA	NA	NA	NA	NA	NA	NA	NA	NA	NA	NA	NA	NA
chr14:71884800-71884913/+	NA	NA	NA	NA	NA	NA	NA	NA	NA	NA	15.789	0	66.423	0	44	0	NA	NA	61.905	0	NA	NA	NA	NA	NA	NA	NA	NA	NA	NA
chr14:71884824-71884913/+	NA	NA	NA	NA	NA	NA	NA	NA	NA	NA	NA	NA	NA	NA	48.148	0	NA	NA	NA	NA	NA	NA	NA	NA	NA	NA	NA	NA	NA	NA
chr14:71884846-71884913/+	NA	NA	48.882	26.316	78.723	26.667	NA	NA	46.512	0	46.919	3.448	88.021	29.67	87.273	20	68.421	0	85.714	25	NA	NA	NA	NA	NA	NA	100	2.703	NA	NA
chr14:71933763-71933964/+	NA	NA	NA	NA	22.034	0	NA	NA	NA	NA	NA	NA	NA	NA	31.707	0	NA	NA	NA	NA	NA	NA	NA	NA	NA	NA	NA	NA	NA	NA
chr14:71933835-71933964/+	NA	NA	NA	NA	NA	NA	NA	NA	NA	NA	NA	NA	NA	NA	30	0	NA	NA	NA	NA	NA	NA	NA	NA	NA	NA	NA	NA	NA	NA
chr14:71948871-71948928/+	NA	NA	NA	NA	NA	NA	NA	NA	NA	NA	NA	NA	20	0	NA	NA	NA	NA	NA	NA	NA	NA	NA	NA	NA	NA	NA	NA	NA	NA
chr14:71995415-71995457/+	NA	NA	NA	NA	NA	NA	NA	NA	NA	NA	NA	NA	18.519	0	21.277	0	NA	NA	NA	NA	NA	NA	NA	NA	NA	NA	NA	NA	NA	NA
chr14:72085921-72086105/+	NA	NA	NA	NA	NA	NA	NA	NA	NA	NA	NA	NA	6.513	0	NA	NA	NA	NA	NA	NA	NA	NA	NA	NA	NA	NA	NA	NA	NA	NA
chr14:73626716-73626846/+	NA	NA	2.583	0	3.662	0	NA	NA	NA	NA	4.668	0	NA	NA	NA	NA	NA	NA	NA	NA	NA	NA	NA	NA	NA	NA	NA	NA	NA	NA
chr14:73749066-73749213/-	NA	NA	NA	NA	100	96.815	NA	NA	NA	NA	NA	NA	NA	NA	NA	NA	NA	NA	NA	NA	NA	NA	NA	NA	NA	NA	NA	NA	NA	NA
chr14:73750788-73751082/-	NA	NA	NA	NA	NA	NA	NA	NA	NA	NA	NA	NA	NA	NA	NA	NA	100	94.4	NA	NA	NA	NA	NA	NA	NA	NA	NA	NA	NA	NA
chr14:74345798-74346008/+	NA	NA	NA	NA	NA	NA	NA	NA	NA	NA	NA	NA	NA	NA	NA	NA	100	76.712	NA	NA	NA	NA	NA	NA	NA	NA	NA	NA	NA	NA
chr14:74363018-74363237/+	NA	NA	NA	NA	NA	NA	NA	NA	NA	NA	100	96.234	NA	NA	NA	NA	NA	NA	NA	NA	NA	NA	NA	NA	NA	NA	NA	NA	NA	NA
chr14:74363050-74363237/+	NA	NA	NA	NA	NA	NA	NA	NA	NA	NA	100	93.182	NA	NA	NA	NA	NA	NA	NA	NA	NA	NA	NA	NA	NA	NA	NA	NA	NA	NA
chr14:74370662-74370813/+	NA	NA	NA	NA	100	96.889	NA	NA	NA	NA	NA	NA	NA	NA	NA	NA	NA	NA	NA	NA	NA	NA	NA	NA	NA	NA	NA	NA	NA	NA
chr14:75134167-75134297/-	NA	NA	NA	NA	100	93.583	NA	NA	NA	NA	NA	NA	NA	NA	NA	NA	NA	NA	NA	NA	NA	NA	NA	NA	NA	NA	NA	NA	NA	NA
chr14:75356553-75356655/+	NA	NA	NA	NA	NA	NA	NA	NA	NA	NA	NA	NA	NA	NA	NA	NA	91.371	0	NA	NA	NA	NA	NA	NA	NA	NA	NA	NA	NA	NA
chr14:75356580-75356655/+	NA	NA	NA	NA	100	95.166	100	87.698	NA	NA	NA	NA	NA	NA	NA	NA	NA	NA	NA	NA	NA	NA	NA	NA	NA	NA	NA	NA	NA	NA
chr14:75356599-75356655/+	NA	NA	NA	NA	100	97.163	100	92.61	NA	NA	NA	NA	NA	NA	NA	NA	NA	NA	NA	NA	NA	NA	NA	NA	NA	NA	NA	NA	NA	NA
chr14:75500121-75500193/-	85.635	74.694	NA	NA	NA	NA	NA	NA	NA	NA	NA	NA	NA	NA	NA	NA	NA	NA	NA	NA	NA	NA	NA	NA	NA	NA	NA	NA	NA	NA
chr14:75587821-75587877/-	NA	NA	NA	NA	100	98.084	NA	NA	NA	NA	NA	NA	NA	NA	NA	NA	NA	NA	NA	NA	NA	NA	NA	NA	NA	NA	NA	NA	NA	NA
chr14:76105694-76105805/+	NA	NA	100	90.476	NA	NA	NA	NA	NA	NA	NA	NA	NA	NA	NA	NA	NA	NA	NA	NA	NA	NA	NA	NA	NA	NA	NA	NA	NA	NA
chr14:76644234-76644274/+	12.836	6.438	22.436	4.762	14.35	1.6	NA	NA	NA	NA	NA	NA	16.442	9.677	13.235	6.061	10.05	1.493	18	3.419	NA	NA	NA	NA	NA	NA	NA	NA	NA	NA
chr14:76644334-76644385/+	NA	NA	NA	NA	NA	NA	83.732	0	NA	NA	NA	NA	NA	NA	NA	NA	NA	NA	NA	NA	NA	NA	NA	NA	NA	NA	NA	NA	NA	NA
chr14:76644550-76644665/+	NA	NA	9.808	5	5.03	0	NA	NA	9.273	0	8.6	0	NA	NA	NA	NA	NA	NA	NA	NA	NA	NA	NA	NA	NA	NA	NA	NA	14.094	1.639
chr14:76644565-76647192/+	96.201	88.506	NA	NA	NA	NA	NA	NA	NA	NA	NA	NA	NA	NA	NA	NA	NA	NA	NA	NA	NA	NA	NA	NA	NA	NA	NA	NA	NA	NA
chr14:76647106-76647192/+	NA	NA	NA	NA	NA	NA	NA	NA	NA	NA	NA	NA	NA	NA	100	96.715	NA	NA	NA	NA	NA	NA	NA	NA	NA	NA	NA	NA	NA	NA
chr14:77765031-77765114/-	NA	NA	NA	NA	NA	NA	NA	NA	NA	NA	100	96.139	NA	NA	NA	NA	NA	NA	NA	NA	NA	NA	NA	NA	NA	NA	NA	NA	NA	NA
chr14:77769177-77769286/-	NA	NA	NA	NA	NA	NA	NA	NA	NA	NA	100	93.939	NA	NA	NA	NA	NA	NA	NA	NA	NA	NA	NA	NA	NA	NA	NA	NA	NA	NA
chr14:77917529-77917676/-	NA	NA	NA	NA	NA	NA	NA	NA	NA	NA	NA	NA	100	92.941	NA	NA	NA	NA	NA	NA	NA	NA	NA	NA	NA	NA	NA	NA	NA	NA
chr14:81958823-81958892/-	100	97.048	NA	NA	NA	NA	NA	NA	NA	NA	NA	NA	NA	NA	NA	NA	NA	NA	NA	NA	NA	NA	NA	NA	NA	NA	NA	NA	NA	NA
chr14:83692105-83692469/+	NA	NA	NA	NA	NA	NA	NA	NA	NA	NA	NA	NA	77.966	45.455	NA	NA	NA	NA	NA	NA	NA	NA	NA	NA	NA	NA	NA	NA	NA	NA
chr14:89068267-89068427/+	83.529	74.458	89.879	83.369	NA	NA	NA	NA	NA	NA	NA	NA	NA	NA	NA	NA	NA	NA	NA	NA	NA	NA	NA	NA	NA	NA	NA	NA	NA	NA
chr14:89069171-89069389/+	78.481	52.653	88.426	71.806	NA	NA	NA	NA	NA	NA	NA	NA	NA	NA	NA	NA	NA	NA	NA	NA	NA	NA	NA	NA	NA	NA	NA	NA	NA	NA
chr14:89069171-89069404/+	82.857	64.848	91.087	79.895	NA	NA	NA	NA	NA	NA	NA	NA	NA	NA	NA	NA	NA	NA	NA	NA	NA	NA	NA	NA	NA	NA	NA	NA	NA	NA
chr14:89656727-89656793/-	NA	NA	NA	NA	NA	NA	NA	NA	NA	NA	NA	NA	NA	NA	NA	NA	50.403	34.031	NA	NA	NA	NA	NA	NA	NA	NA	NA	NA	NA	NA
chr14:89656730-89656793/-	NA	NA	NA	NA	NA	NA	NA	NA	NA	NA	NA	NA	NA	NA	NA	NA	41.568	25.664	NA	NA	NA	NA	NA	NA	NA	NA	NA	NA	NA	NA
chr14:89747293-89747358/-	NA	NA	NA	NA	NA	NA	NA	NA	NA	NA	NA	NA	NA	NA	NA	NA	100	98.476	NA	NA	NA	NA	NA	NA	NA	NA	NA	NA	NA	NA
chr14:89761758-89761860/-	NA	NA	NA	NA	NA	NA	NA	NA	NA	NA	NA	NA	NA	NA	NA	NA	5.367	0.415	NA	NA	NA	NA	NA	NA	NA	NA	NA	NA	NA	NA
chr14:90449457-90449620/+	3.867	0	NA	NA	NA	NA	NA	NA	NA	NA	NA	NA	NA	NA	NA	NA	NA	NA	NA	NA	NA	NA	NA	NA	NA	NA	NA	NA	NA	NA
chr14:91196418-91196540/-	NA	NA	NA	NA	100	87.755	NA	NA	NA	NA	NA	NA	NA	NA	NA	NA	NA	NA	NA	NA	NA	NA	NA	NA	NA	NA	NA	NA	NA	NA
chr14:91655999-91656151/+	NA	NA	NA	NA	NA	NA	NA	NA	NA	NA	NA	NA	11.688	4.931	NA	NA	NA	NA	NA	NA	NA	NA	NA	NA	NA	NA	NA	NA	NA	NA
chr14:92562436-92562478/-	NA	NA	NA	NA	NA	NA	NA	NA	NA	NA	NA	NA	NA	NA	NA	NA	NA	NA	NA	NA	NA	NA	NA	NA	NA	NA	NA	NA	100	80.282
chr14:93719992-93720136/-	NA	NA	NA	NA	NA	NA	NA	NA	NA	NA	NA	NA	NA	NA	100	97.096	NA	NA	NA	NA	NA	NA	NA	NA	NA	NA	NA	NA	NA	NA
chr14:94071241-94071307/+	NA	NA	NA	NA	67.01	50	NA	NA	NA	NA	NA	NA	NA	NA	NA	NA	NA	NA	NA	NA	NA	NA	NA	NA	NA	NA	NA	NA	NA	NA
chr14:95607490-95607524/-	NA	NA	NA	NA	NA	NA	NA	NA	NA	NA	NA	NA	NA	NA	NA	NA	NA	NA	NA	NA	NA	NA	NA	NA	NA	NA	NA	NA	37.931	3.448
chr14:96993766-96993876/+	NA	NA	NA	NA	100	95.556	NA	NA	NA	NA	NA	NA	NA	NA	NA	NA	NA	NA	NA	NA	NA	NA	NA	NA	NA	NA	NA	NA	NA	NA
chr14:99879287-99879402/-	NA	NA	NA	NA	NA	NA	NA	NA	NA	NA	NA	NA	NA	NA	NA	NA	98.578	95.376	NA	NA	NA	NA	NA	NA	NA	NA	NA	NA	NA	NA
chr14:99927528-99927677/-	NA	NA	NA	NA	NA	NA	NA	NA	NA	NA	100	86.207	NA	NA	NA	NA	NA	NA	NA	NA	NA	NA	NA	NA	NA	NA	NA	NA	NA	NA
chr15:100211527-100211659/+	NA	NA	NA	NA	NA	NA	NA	NA	NA	NA	88.462	68.652	NA	NA	NA	NA	NA	NA	NA	NA	NA	NA	NA	NA	NA	NA	NA	NA	NA	NA
chr15:101971524-101971668/-	NA	NA	NA	NA	NA	NA	77.108	62.462	NA	NA	NA	NA	NA	NA	NA	NA	NA	NA	NA	NA	NA	NA	NA	NA	NA	NA	NA	NA	NA	NA
chr15:20666444-20666595/-	NA	NA	96.564	92.437	NA	NA	NA	NA	NA	NA	NA	NA	NA	NA	NA	NA	NA	NA	NA	NA	NA	NA	NA	NA	NA	NA	NA	NA	NA	NA
chr15:20682177-20682309/-	12.599	6.13	NA	NA	NA	NA	NA	NA	100	8.271	NA	NA	NA	NA	NA	NA	NA	NA	NA	NA	NA	NA	NA	NA	NA	NA	NA	NA	NA	NA
chr15:22925975-22926065/+	NA	NA	NA	NA	100	97.59	NA	NA	NA	NA	NA	NA	NA	NA	NA	NA	NA	NA	NA	NA	NA	NA	NA	NA	NA	NA	NA	NA	NA	NA
chr15:22956038-22956186/+	NA	NA	12.941	2.703	NA	NA	NA	NA	NA	NA	NA	NA	NA	NA	NA	NA	NA	NA	NA	NA	NA	NA	NA	NA	NA	NA	NA	NA	NA	NA
chr15:23027800-23027922/-	NA	NA	NA	NA	NA	NA	NA	NA	63.158	45.972	NA	NA	NA	NA	NA	NA	NA	NA	NA	NA	NA	NA	NA	NA	NA	NA	NA	NA	NA	NA
chr15:23029839-23029966/-	NA	NA	NA	NA	NA	NA	NA	NA	20.548	5.085	NA	NA	NA	NA	NA	NA	NA	NA	NA	NA	NA	NA	NA	NA	NA	NA	NA	NA	NA	NA
chr15:23356105-23356220/-	NA	NA	NA	NA	NA	NA	90.361	70.769	NA	NA	NA	NA	NA	NA	NA	NA	NA	NA	NA	NA	NA	NA	NA	NA	NA	NA	NA	NA	NA	NA
chr15:25212175-25212299/+	NA	NA	NA	NA	NA	NA	NA	NA	NA	NA	NA	NA	NA	NA	NA	NA	NA	NA	100	1.146	NA	NA	NA	NA	NA	NA	16.883	5.486	NA	NA
chr15:25212175-25212387/+	100	2.171	NA	NA	NA	NA	NA	NA	NA	NA	NA	NA	NA	NA	NA	NA	3.63	2.995	100	0.803	NA	NA	NA	NA	NA	NA	NA	NA	NA	NA
chr15:25298974-25300013/+	NA	NA	NA	NA	NA	NA	NA	NA	NA	NA	NA	NA	NA	NA	NA	NA	97.606	94.977	NA	NA	NA	NA	NA	NA	NA	NA	NA	NA	NA	NA
chr15:25300116-25300377/+	NA	NA	NA	NA	NA	NA	NA	NA	NA	NA	NA	NA	NA	NA	NA	NA	20.858	16.489	NA	NA	NA	NA	NA	NA	100	27.586	NA	NA	NA	NA
chr15:25300220-25300377/+	NA	NA	NA	NA	NA	NA	NA	NA	NA	NA	NA	NA	NA	NA	NA	NA	16.232	12.48	NA	NA	NA	NA	NA	NA	NA	NA	NA	NA	NA	NA
chr15:25300225-25300377/+	NA	NA	NA	NA	NA	NA	NA	NA	NA	NA	NA	NA	NA	NA	NA	NA	15.62	12.269	NA	NA	NA	NA	NA	NA	NA	NA	NA	NA	NA	NA
chr15:25306452-25306560/+	NA	NA	NA	NA	NA	NA	NA	NA	NA	NA	NA	NA	NA	NA	100	80	NA	NA	NA	NA	NA	NA	NA	NA	NA	NA	NA	NA	NA	NA
chr15:25312555-25312678/+	NA	NA	NA	NA	NA	NA	NA	NA	NA	NA	NA	NA	NA	NA	NA	NA	38.17	23.416	NA	NA	NA	NA	NA	NA	NA	NA	NA	NA	NA	NA
chr15:25312558-25312678/+	NA	NA	NA	NA	NA	NA	NA	NA	NA	NA	NA	NA	NA	NA	NA	NA	43.88	25.933	NA	NA	NA	NA	NA	NA	NA	NA	NA	NA	NA	NA
chr15:25312561-25312678/+	NA	NA	NA	NA	NA	NA	NA	NA	NA	NA	NA	NA	NA	NA	NA	NA	43.027	0	NA	NA	NA	NA	NA	NA	NA	NA	NA	NA	NA	NA
chr15:25316434-25317721/+	NA	NA	NA	NA	NA	NA	NA	NA	NA	NA	NA	NA	NA	NA	NA	NA	1.176	0	NA	NA	NA	NA	NA	NA	NA	NA	NA	NA	NA	NA
chr15:25324972-25325124/+	NA	NA	NA	NA	NA	NA	NA	NA	NA	NA	NA	NA	NA	NA	NA	NA	13.792	10.204	NA	NA	NA	NA	NA	NA	NA	NA	NA	NA	NA	NA
chr15:25324972-25325226/+	NA	NA	NA	NA	NA	NA	NA	NA	NA	NA	NA	NA	NA	NA	NA	NA	27.918	20.68	NA	NA	NA	NA	NA	NA	NA	NA	NA	NA	NA	NA
chr15:25325245-25325376/+	NA	NA	NA	NA	NA	NA	NA	NA	NA	NA	NA	NA	NA	NA	NA	NA	1.322	0	NA	NA	NA	NA	NA	NA	NA	NA	NA	NA	NA	NA
chr15:25325271-25325376/+	NA	NA	NA	NA	NA	NA	NA	NA	NA	NA	NA	NA	NA	NA	NA	NA	1.354	0.183	NA	NA	NA	NA	NA	NA	NA	NA	NA	NA	NA	NA
chr15:25326327-25326371/+	NA	NA	NA	NA	NA	NA	NA	NA	NA	NA	NA	NA	NA	NA	NA	NA	89.789	0	NA	NA	NA	NA	NA	NA	NA	NA	NA	NA	NA	NA
chr15:25330336-25330469/+	NA	NA	NA	NA	NA	NA	NA	NA	NA	NA	NA	NA	NA	NA	NA	NA	NA	NA	NA	NA	92.51	84.071	NA	NA	NA	NA	NA	NA	NA	NA
chr15:25331088-25331761/+	NA	NA	NA	NA	NA	NA	NA	NA	NA	NA	NA	NA	NA	NA	NA	NA	10.167	0	NA	NA	NA	NA	NA	NA	NA	NA	NA	NA	NA	NA
chr15:25331477-25331761/+	NA	NA	NA	NA	NA	NA	NA	NA	NA	NA	NA	NA	NA	NA	NA	NA	11.466	7.446	NA	NA	NA	NA	NA	NA	NA	NA	NA	NA	NA	NA
chr15:25331481-25331761/+	NA	NA	NA	NA	NA	NA	NA	NA	NA	NA	NA	NA	NA	NA	NA	NA	9.917	0	NA	NA	NA	NA	NA	NA	NA	NA	NA	NA	NA	NA
chr15:25331543-25331761/+	NA	NA	NA	NA	NA	NA	NA	NA	NA	NA	NA	NA	NA	NA	NA	NA	10.017	0	NA	NA	NA	NA	NA	NA	NA	NA	NA	NA	NA	NA
chr15:25331656-25331761/+	NA	NA	NA	NA	NA	NA	NA	NA	NA	NA	NA	NA	NA	NA	NA	NA	12.649	6.655	NA	NA	7.634	0	NA	NA	41.463	8.543	NA	NA	31.034	8.543
chr15:25334811-25335157/+	NA	NA	NA	NA	NA	NA	NA	NA	NA	NA	NA	NA	NA	NA	NA	NA	12.113	0	NA	NA	NA	NA	NA	NA	NA	NA	NA	NA	NA	NA
chr15:25334992-25335013/+	NA	NA	NA	NA	NA	NA	NA	NA	NA	NA	NA	NA	NA	NA	NA	NA	54.508	0	NA	NA	NA	NA	NA	NA	NA	NA	NA	NA	NA	NA
chr15:25335108-25335157/+	NA	NA	NA	NA	NA	NA	NA	NA	NA	NA	NA	NA	NA	NA	NA	NA	4.045	0	NA	NA	NA	NA	NA	NA	NA	NA	NA	NA	NA	NA
chr15:25336915-25337078/+	NA	NA	NA	NA	NA	NA	NA	NA	NA	NA	NA	NA	NA	NA	NA	NA	5.18	1.285	NA	NA	NA	NA	NA	NA	NA	NA	NA	NA	NA	NA
chr15:25339205-25340975/+	NA	NA	NA	NA	NA	NA	NA	NA	NA	NA	NA	NA	NA	NA	NA	NA	82.834	0	NA	NA	NA	NA	NA	NA	NA	NA	NA	NA	NA	NA
chr15:25341989-25342177/+	NA	NA	NA	NA	NA	NA	NA	NA	NA	NA	NA	NA	NA	NA	NA	NA	7.852	0	NA	NA	NA	NA	NA	NA	NA	NA	NA	NA	NA	NA
chr15:25342527-25342586/+	NA	NA	NA	NA	NA	NA	NA	NA	NA	NA	NA	NA	NA	NA	NA	NA	75.887	0	NA	NA	NA	NA	NA	NA	NA	NA	NA	NA	NA	NA
chr15:25638892-25639005/-	NA	NA	2.172	0	NA	NA	NA	NA	NA	NA	NA	NA	NA	NA	NA	NA	NA	NA	NA	NA	NA	NA	NA	NA	NA	NA	NA	NA	NA	NA
chr15:25652200-25652284/-	NA	NA	7.463	0	NA	NA	NA	NA	NA	NA	NA	NA	NA	NA	NA	NA	NA	NA	NA	NA	NA	NA	NA	NA	NA	NA	NA	NA	NA	NA
chr15:25652213-25652284/-	NA	NA	NA	NA	NA	NA	NA	NA	NA	NA	35.905	13.744	37.913	22.424	38.182	16.588	NA	NA	29.101	18.072	26.293	8.108	NA	NA	30.37	10.256	30.256	9.827	60.889	10.256
chr15:25652213-25652359/-	NA	NA	NA	NA	NA	NA	NA	NA	NA	NA	NA	NA	NA	NA	NA	NA	NA	NA	NA	NA	NA	NA	NA	NA	NA	NA	NA	NA	47.463	9.677
chr15:25652213-25652375/-	NA	NA	NA	NA	NA	NA	NA	NA	NA	NA	28.947	13.744	32.782	21.713	NA	NA	NA	NA	NA	NA	NA	NA	NA	NA	NA	NA	NA	NA	NA	NA
chr15:25652213-25652379/-	NA	NA	NA	NA	NA	NA	NA	NA	NA	NA	NA	NA	32.967	21.951	NA	NA	NA	NA	NA	NA	NA	NA	NA	NA	NA	NA	NA	NA	NA	NA
chr15:25652213-25652409/-	NA	NA	NA	NA	NA	NA	NA	NA	NA	NA	30.99	16.514	39.901	27.273	36.646	18.519	NA	NA	NA	NA	22.096	9.735	NA	NA	27.692	12.226	37.9	12.605	56.65	12.226
chr15:25652213-25653831/-	NA	NA	NA	NA	NA	NA	NA	NA	NA	NA	NA	NA	48.956	25.373	NA	NA	36.757	20.968	NA	NA	NA	NA	NA	NA	45.806	10.323	NA	NA	NA	NA
chr15:25653718-25653831/-	32.212	0	18.321	0	34.186	0	30	0	12.143	0	29.167	0	29.348	5.369	26.016	10.191	NA	NA	NA	NA	NA	NA	NA	NA	NA	NA	74.905	7.113	56.767	0
chr15:25653766-25653831/-	34.727	8.974	25.866	5.069	31.928	10.526	42.466	21.93	NA	NA	33.713	2.941	36.275	9.032	38.037	12.159	29.6	10.169	37.198	3.75	25.055	3.704	34.783	8.671	41.573	1.325	81.089	8.671	66.763	1.418
chr15:25654234-25654354/-	NA	NA	80.425	71.429	96.678	89.189	NA	NA	NA	NA	81.25	71.3	94.527	83.75	94.186	81.864	91.601	68.421	NA	NA	81.986	38.776	94.444	67.808	NA	NA	NA	NA	NA	NA
chr15:25657054-25657118/-	NA	NA	NA	NA	NA	NA	NA	NA	NA	NA	NA	NA	NA	NA	NA	NA	85.778	61.111	NA	NA	NA	NA	NA	NA	NA	NA	NA	NA	NA	NA
chr15:25939965-25940293/-	NA	NA	NA	NA	NA	NA	NA	NA	NA	NA	99.694	96.905	NA	NA	NA	NA	NA	NA	NA	NA	NA	NA	NA	NA	NA	NA	NA	NA	NA	NA
chr15:28515840-28516014/-	NA	NA	NA	NA	98.638	82.178	100	87.156	NA	NA	NA	NA	NA	NA	NA	NA	NA	NA	NA	NA	NA	NA	NA	NA	NA	NA	NA	NA	NA	NA
chr15:29306293-29306483/+	29.091	7.042	NA	NA	NA	NA	NA	NA	NA	NA	NA	NA	NA	NA	NA	NA	NA	NA	NA	NA	NA	NA	NA	NA	NA	NA	NA	NA	NA	NA
chr15:30933724-30933820/+	NA	NA	77.778	36.508	NA	NA	NA	NA	NA	NA	NA	NA	NA	NA	NA	NA	NA	NA	NA	NA	NA	NA	NA	NA	NA	NA	NA	NA	NA	NA
chr15:30950968-30951047/+	54.717	28.571	NA	NA	NA	NA	NA	NA	NA	NA	NA	NA	NA	NA	NA	NA	NA	NA	NA	NA	NA	NA	NA	NA	NA	NA	NA	NA	NA	NA
chr15:31201725-31201968/+	NA	NA	17.895	2.797	NA	NA	NA	NA	NA	NA	NA	NA	NA	NA	NA	NA	NA	NA	NA	NA	NA	NA	NA	NA	NA	NA	NA	NA	NA	NA
chr15:32816671-32816801/-	NA	NA	NA	NA	NA	NA	NA	NA	NA	NA	NA	NA	100	63.19	NA	NA	NA	NA	NA	NA	NA	NA	NA	NA	NA	NA	NA	NA	NA	NA
chr15:34837058-34837154/-	NA	NA	NA	NA	NA	NA	NA	NA	NA	NA	NA	NA	NA	NA	NA	NA	NA	NA	NA	NA	NA	NA	NA	NA	NA	NA	NA	NA	45.946	0
chr15:36984326-36984376/+	NA	NA	NA	NA	NA	NA	100	93.182	NA	NA	NA	NA	NA	NA	NA	NA	NA	NA	NA	NA	NA	NA	NA	NA	NA	NA	NA	NA	NA	NA
chr15:39310702-39310782/-	NA	NA	NA	NA	NA	NA	NA	NA	NA	NA	NA	NA	NA	NA	38.462	0	NA	NA	NA	NA	NA	NA	NA	NA	NA	NA	NA	NA	NA	NA
chr15:39880242-39880419/+	NA	NA	NA	NA	NA	NA	NA	NA	NA	NA	NA	NA	NA	NA	NA	NA	NA	NA	NA	NA	99.996	99.958	NA	NA	NA	NA	NA	NA	NA	NA
chr15:39880726-39880900/+	NA	NA	NA	NA	NA	NA	NA	NA	NA	NA	99.921	99.649	NA	NA	NA	NA	NA	NA	NA	NA	99.85	99.342	NA	NA	NA	NA	NA	NA	NA	NA
chr15:40308702-40308873/+	NA	NA	NA	NA	NA	NA	NA	NA	100	86.207	NA	NA	NA	NA	NA	NA	NA	NA	NA	NA	NA	NA	NA	NA	NA	NA	NA	NA	NA	NA
chr15:40708276-40708381/+	NA	NA	NA	NA	NA	NA	NA	NA	NA	NA	100	98.22	NA	NA	NA	NA	NA	NA	NA	NA	NA	NA	NA	NA	NA	NA	NA	NA	NA	NA
chr15:41011002-41011097/+	NA	NA	97.971	93.417	NA	NA	NA	NA	NA	NA	NA	NA	NA	NA	NA	NA	NA	NA	NA	NA	NA	NA	NA	NA	NA	NA	NA	NA	NA	NA
chr15:41554953-41555081/+	NA	NA	99.794	98.127	NA	NA	NA	NA	NA	NA	NA	NA	NA	NA	NA	NA	NA	NA	NA	NA	NA	NA	NA	NA	NA	NA	NA	NA	NA	NA
chr15:41634583-41634652/+	100	97.12	NA	NA	NA	NA	NA	NA	NA	NA	NA	NA	NA	NA	NA	NA	NA	NA	NA	NA	NA	NA	NA	NA	NA	NA	NA	NA	NA	NA
chr15:41667909-41668026/+	NA	NA	NA	NA	NA	NA	NA	NA	NA	NA	100	92.385	NA	NA	NA	NA	NA	NA	NA	NA	NA	NA	NA	NA	NA	NA	NA	NA	NA	NA
chr15:42852979-42853068/+	NA	NA	53.425	30.345	NA	NA	NA	NA	NA	NA	NA	NA	NA	NA	NA	NA	NA	NA	NA	NA	NA	NA	NA	NA	NA	NA	NA	NA	NA	NA
chr15:43276094-43276191/-	NA	NA	NA	NA	NA	NA	NA	NA	NA	NA	NA	NA	98.496	93.035	NA	NA	NA	NA	NA	NA	NA	NA	NA	NA	NA	NA	NA	NA	NA	NA
chr15:43441226-43441349/+	NA	NA	100	94.964	NA	NA	NA	NA	NA	NA	NA	NA	NA	NA	NA	NA	NA	NA	NA	NA	NA	NA	NA	NA	NA	NA	NA	NA	NA	NA
chr15:43675500-43675702/+	NA	NA	100	94.574	NA	NA	NA	NA	NA	NA	NA	NA	NA	NA	NA	NA	NA	NA	NA	NA	NA	NA	NA	NA	NA	NA	NA	NA	NA	NA
chr15:43724391-43724875/-	NA	NA	NA	NA	NA	NA	NA	NA	NA	NA	NA	NA	NA	NA	NA	NA	NA	NA	100	97.565	NA	NA	NA	NA	NA	NA	NA	NA	NA	NA
chr15:43738963-43739112/-	14.388	3.896	22.581	14.634	NA	NA	NA	NA	NA	NA	NA	NA	NA	NA	NA	NA	NA	NA	NA	NA	NA	NA	NA	NA	NA	NA	NA	NA	NA	NA
chr15:43866006-43866230/-	NA	NA	100	95.745	NA	NA	NA	NA	NA	NA	NA	NA	NA	NA	NA	NA	NA	NA	NA	NA	NA	NA	NA	NA	NA	NA	NA	NA	NA	NA
chr15:44795621-44796048/+	13.122	3.333	NA	NA	NA	NA	NA	NA	NA	NA	NA	NA	NA	NA	NA	NA	NA	NA	NA	NA	NA	NA	NA	NA	NA	NA	NA	NA	NA	NA
chr15:44881449-44881612/-	NA	NA	NA	NA	100	92.07	NA	NA	NA	NA	NA	NA	NA	NA	NA	NA	NA	NA	NA	NA	NA	NA	NA	NA	NA	NA	NA	NA	NA	NA
chr15:44903037-44903183/-	NA	NA	NA	NA	98.367	95.2	NA	NA	NA	NA	NA	NA	NA	NA	NA	NA	NA	NA	NA	NA	NA	NA	NA	NA	NA	NA	NA	NA	NA	NA
chr15:49574183-49574282/+	89.542	78.305	NA	NA	NA	NA	NA	NA	NA	NA	100	90.099	NA	NA	100	93.425	NA	NA	NA	NA	NA	NA	NA	NA	NA	NA	NA	NA	NA	NA
chr15:49574183-49574286/+	83.673	60	NA	NA	NA	NA	NA	NA	NA	NA	NA	NA	NA	NA	NA	NA	NA	NA	NA	NA	NA	NA	NA	NA	NA	NA	NA	NA	NA	NA
chr15:49575762-49575915/+	NA	NA	NA	NA	NA	NA	100	97.183	NA	NA	100	91.071	NA	NA	NA	NA	NA	NA	NA	NA	NA	NA	NA	NA	NA	NA	NA	NA	NA	NA
chr15:49600804-49600974/+	13.514	0	NA	NA	NA	NA	NA	NA	NA	NA	NA	NA	NA	NA	NA	NA	NA	NA	NA	NA	NA	NA	NA	NA	NA	NA	NA	NA	NA	NA
chr15:49611168-49611313/+	NA	NA	28.079	10.617	NA	NA	NA	NA	NA	NA	NA	NA	NA	NA	NA	NA	NA	NA	NA	NA	NA	NA	NA	NA	NA	NA	NA	NA	NA	NA
chr15:50920345-50920446/-	NA	NA	NA	NA	NA	NA	NA	NA	NA	NA	NA	NA	99.5	94.928	NA	NA	NA	NA	NA	NA	NA	NA	NA	NA	NA	NA	NA	NA	NA	NA
chr15:51745746-51745838/-	100	95.062	NA	NA	NA	NA	100	94.012	NA	NA	NA	NA	NA	NA	NA	NA	NA	NA	NA	NA	NA	NA	NA	NA	NA	NA	NA	NA	NA	NA
chr15:52439655-52439732/-	NA	NA	NA	NA	NA	NA	NA	NA	NA	NA	100	99.128	NA	NA	NA	NA	NA	NA	NA	NA	NA	NA	NA	NA	NA	NA	NA	NA	NA	NA
chr15:52699488-52699596/-	100	96.825	NA	NA	NA	NA	NA	NA	NA	NA	NA	NA	NA	NA	NA	NA	NA	NA	NA	NA	NA	NA	NA	NA	NA	NA	NA	NA	NA	NA
chr15:56148328-56148394/-	NA	NA	NA	NA	NA	NA	95.215	86.164	NA	NA	NA	NA	NA	NA	NA	NA	NA	NA	NA	NA	NA	NA	NA	NA	NA	NA	NA	NA	NA	NA
chr15:56207481-56209109/-	NA	NA	NA	NA	NA	NA	NA	NA	NA	NA	NA	NA	NA	NA	NA	NA	NA	NA	51.22	27.35	NA	NA	NA	NA	NA	NA	NA	NA	NA	NA
chr15:57385688-57385796/+	NA	NA	NA	NA	NA	NA	NA	NA	NA	NA	NA	NA	NA	NA	NA	NA	NA	NA	NA	NA	NA	NA	NA	NA	NA	NA	NA	NA	84.615	0
chr15:57387274-57387361/+	NA	NA	NA	NA	NA	NA	NA	NA	NA	NA	NA	NA	NA	NA	NA	NA	NA	NA	NA	NA	NA	NA	NA	NA	NA	NA	NA	NA	77.778	0
chr15:57544618-57544690/+	NA	NA	NA	NA	NA	NA	7.303	3.178	NA	NA	NA	NA	NA	NA	NA	NA	41.272	34.812	NA	NA	NA	NA	NA	NA	NA	NA	NA	NA	NA	NA
chr15:58936084-58936177/-	NA	NA	NA	NA	NA	NA	NA	NA	NA	NA	99.506	96.496	NA	NA	NA	NA	NA	NA	NA	NA	NA	NA	NA	NA	NA	NA	NA	NA	NA	NA
chr15:59205697-59205895/-	NA	NA	NA	NA	100	77.778	NA	NA	NA	NA	NA	NA	NA	NA	NA	NA	NA	NA	NA	NA	NA	NA	NA	NA	NA	NA	NA	NA	NA	NA
chr15:59563373-59563433/-	1.066	0.366	NA	NA	NA	NA	NA	NA	NA	NA	NA	NA	NA	NA	NA	NA	NA	NA	NA	NA	NA	NA	NA	NA	NA	NA	NA	NA	NA	NA
chr15:60643922-60644018/-	NA	NA	NA	NA	NA	NA	NA	NA	NA	NA	NA	NA	NA	NA	100	97.048	NA	NA	NA	NA	NA	NA	NA	NA	NA	NA	NA	NA	NA	NA
chr15:60653139-60653253/-	NA	NA	NA	NA	NA	NA	NA	NA	NA	NA	NA	NA	NA	NA	100	97.548	NA	NA	NA	NA	NA	NA	NA	NA	NA	NA	NA	NA	NA	NA
chr15:60662789-60663777/-	100	0.055	NA	NA	NA	NA	NA	NA	NA	NA	NA	NA	NA	NA	NA	NA	NA	NA	NA	NA	NA	NA	NA	NA	NA	NA	NA	NA	NA	NA
chr15:60662789-60663781/-	0.233	0.129	NA	NA	NA	NA	NA	NA	NA	NA	NA	NA	NA	NA	NA	NA	NA	NA	NA	NA	NA	NA	NA	NA	NA	NA	NA	NA	NA	NA
chr15:60662789-60666881/-	0.175	0.055	NA	NA	NA	NA	NA	NA	NA	NA	NA	NA	NA	NA	NA	NA	NA	NA	NA	NA	NA	NA	NA	NA	NA	NA	NA	NA	NA	NA
chr15:60662789-60669385/-	0.161	0.044	NA	NA	NA	NA	NA	NA	NA	NA	NA	NA	NA	NA	NA	NA	NA	NA	NA	NA	NA	NA	NA	NA	NA	NA	NA	NA	NA	NA
chr15:60662789-60673560/-	0.161	0.044	NA	NA	NA	NA	NA	NA	NA	NA	NA	NA	NA	NA	NA	NA	NA	NA	NA	NA	NA	NA	NA	NA	NA	NA	NA	NA	NA	NA
chr15:60666817-60666881/-	NA	NA	NA	NA	NA	NA	NA	NA	NA	NA	NA	NA	NA	NA	100	0.011	NA	NA	NA	NA	NA	NA	NA	NA	NA	NA	NA	NA	NA	NA
chr15:60666817-60674640/-	NA	NA	NA	NA	NA	NA	NA	NA	NA	NA	NA	NA	NA	NA	99.677	99.528	NA	NA	NA	NA	NA	NA	NA	NA	NA	NA	NA	NA	NA	NA
chr15:60674540-60674640/-	NA	NA	NA	NA	NA	NA	NA	NA	NA	NA	99.301	97.265	NA	NA	99.899	99.833	NA	NA	NA	NA	NA	NA	NA	NA	NA	NA	NA	NA	NA	NA
chr15:60678226-60678285/-	NA	NA	NA	NA	NA	NA	NA	NA	NA	NA	99.927	99.884	NA	NA	NA	NA	NA	NA	NA	NA	NA	NA	NA	NA	NA	NA	NA	NA	NA	NA
chr15:60688349-60688626/-	0.907	0.531	NA	NA	NA	NA	NA	NA	NA	NA	0.345	0.171	NA	NA	NA	NA	NA	NA	NA	NA	NA	NA	NA	NA	NA	NA	NA	NA	NA	NA
chr15:63826001-63826117/+	NA	NA	NA	NA	NA	NA	NA	NA	NA	NA	NA	NA	NA	NA	NA	NA	NA	NA	NA	NA	NA	NA	NA	NA	NA	NA	NA	NA	20.755	6.849
chr15:64410315-64410443/+	NA	NA	NA	NA	NA	NA	NA	NA	NA	NA	NA	NA	100	94.162	NA	NA	NA	NA	NA	NA	NA	NA	NA	NA	NA	NA	NA	NA	NA	NA
chr15:64410401-64410443/+	NA	NA	73.171	0	NA	NA	NA	NA	NA	NA	NA	NA	NA	NA	NA	NA	NA	NA	NA	NA	NA	NA	NA	NA	NA	NA	NA	NA	NA	NA
chr15:64706283-64706410/+	100	96	NA	NA	NA	NA	NA	NA	NA	NA	NA	NA	NA	NA	NA	NA	NA	NA	NA	NA	NA	NA	NA	NA	NA	NA	NA	NA	NA	NA
chr15:65042541-65042580/-	NA	NA	NA	NA	NA	NA	NA	NA	NA	NA	NA	NA	NA	NA	NA	NA	100	94.547	NA	NA	NA	NA	NA	NA	NA	NA	NA	NA	NA	NA
chr15:65268812-65268893/-	NA	NA	NA	NA	NA	NA	NA	NA	NA	NA	99.043	94.954	100	95.696	NA	NA	NA	NA	NA	NA	NA	NA	NA	NA	NA	NA	NA	NA	NA	NA
chr15:65316009-65316132/-	100	94.894	NA	NA	NA	NA	NA	NA	NA	NA	NA	NA	NA	NA	NA	NA	NA	NA	NA	NA	NA	NA	NA	NA	NA	NA	NA	NA	NA	NA
chr15:65744297-65744440/-	100	96.648	NA	NA	NA	NA	NA	NA	NA	NA	NA	NA	NA	NA	NA	NA	NA	NA	NA	NA	NA	NA	NA	NA	NA	NA	NA	NA	NA	NA
chr15:65766546-65766626/-	100	93.284	NA	NA	97.638	90.278	100	87.234	NA	NA	NA	NA	100	88.166	NA	NA	NA	NA	NA	NA	NA	NA	NA	NA	NA	NA	NA	NA	NA	NA
chr15:65855111-65855222/+	100	99.095	NA	NA	NA	NA	NA	NA	NA	NA	NA	NA	NA	NA	NA	NA	NA	NA	NA	NA	NA	NA	NA	NA	NA	NA	NA	NA	NA	NA
chr15:65897466-65897570/-	NA	NA	100	94.31	NA	NA	NA	NA	NA	NA	NA	NA	NA	NA	NA	NA	NA	NA	NA	NA	NA	NA	NA	NA	NA	NA	NA	NA	NA	NA
chr15:65897466-65897574/-	NA	NA	NA	NA	98.618	95.475	NA	NA	NA	NA	NA	NA	NA	NA	NA	NA	NA	NA	NA	NA	NA	NA	NA	NA	NA	NA	NA	NA	NA	NA
chr15:65992881-65993010/-	NA	NA	90.21	40.187	NA	NA	NA	NA	NA	NA	NA	NA	63.429	36.599	NA	NA	NA	NA	NA	NA	NA	NA	NA	NA	NA	NA	NA	NA	NA	NA
chr15:66735617-66735695/+	NA	NA	NA	NA	NA	NA	NA	NA	NA	NA	NA	NA	100	97.454	NA	NA	NA	NA	NA	NA	NA	NA	NA	NA	NA	NA	NA	NA	NA	NA
chr15:66794949-66795088/-	100	99.976	NA	NA	NA	NA	NA	NA	NA	NA	NA	NA	NA	NA	NA	NA	NA	NA	NA	NA	NA	NA	NA	NA	NA	NA	NA	NA	NA	NA
chr15:67457590-67457722/+	NA	NA	NA	NA	NA	NA	NA	NA	NA	NA	NA	NA	NA	NA	NA	NA	NA	NA	NA	NA	100	98.036	NA	NA	NA	NA	NA	NA	NA	NA
chr15:68503986-68504201/-	94.449	0	95.002	0	NA	NA	NA	NA	91.336	0	NA	NA	NA	NA	NA	NA	NA	NA	NA	NA	NA	NA	NA	NA	NA	NA	NA	NA	NA	NA
chr15:68504012-68504201/-	95.584	90.476	95.881	91.485	NA	NA	NA	NA	NA	NA	NA	NA	NA	NA	NA	NA	NA	NA	NA	NA	NA	NA	NA	NA	NA	NA	NA	NA	NA	NA
chr15:68506627-68506726/-	98.342	91.128	NA	NA	NA	NA	NA	NA	NA	NA	NA	NA	NA	NA	NA	NA	NA	NA	NA	NA	NA	NA	NA	NA	NA	NA	NA	NA	NA	NA
chr15:69641616-69641686/+	18.261	0	NA	NA	NA	NA	NA	NA	NA	NA	NA	NA	NA	NA	NA	NA	NA	NA	NA	NA	NA	NA	NA	NA	NA	NA	NA	NA	NA	NA
chr15:69677015-69677221/+	89.186	81.024	NA	NA	NA	NA	NA	NA	NA	NA	NA	NA	NA	NA	NA	NA	NA	NA	NA	NA	NA	NA	NA	NA	NA	NA	NA	NA	NA	NA
chr15:69681992-69682119/+	89.151	79.642	NA	NA	NA	NA	NA	NA	NA	NA	NA	NA	NA	NA	NA	NA	NA	NA	NA	NA	NA	NA	NA	NA	NA	NA	NA	NA	NA	NA
chr15:69681992-69687399/+	85.366	68.103	NA	NA	NA	NA	NA	NA	NA	NA	NA	NA	NA	NA	NA	NA	NA	NA	NA	NA	NA	NA	NA	NA	NA	NA	NA	NA	NA	NA
chr15:70979878-70979985/-	NA	NA	NA	NA	NA	NA	NA	NA	NA	NA	99.811	98.282	NA	NA	NA	NA	NA	NA	NA	NA	NA	NA	NA	NA	NA	NA	NA	NA	NA	NA
chr15:71518759-71518856/+	NA	NA	NA	NA	NA	NA	NA	NA	NA	NA	NA	NA	NA	NA	6.277	0	NA	NA	NA	NA	NA	NA	NA	NA	NA	NA	NA	NA	NA	NA
chr15:71519913-71519992/+	NA	NA	NA	NA	NA	NA	NA	NA	NA	NA	NA	NA	NA	NA	11.417	2.51	NA	NA	NA	NA	NA	NA	NA	NA	NA	NA	NA	NA	NA	NA
chr15:71525369-71525415/+	2.632	0	NA	NA	NA	NA	NA	NA	NA	NA	NA	NA	NA	NA	5.832	1.66	NA	NA	NA	NA	NA	NA	NA	NA	NA	NA	NA	NA	NA	NA
chr15:71538278-71538383/+	10.103	0	NA	NA	NA	NA	NA	NA	NA	NA	8.779	0	NA	NA	13.687	2.742	NA	NA	4.394	0	NA	NA	NA	NA	NA	NA	NA	NA	NA	NA
chr15:71640646-71640829/+	4.6	0	NA	NA	NA	NA	NA	NA	NA	NA	NA	NA	NA	NA	NA	NA	NA	NA	NA	NA	NA	NA	NA	NA	NA	NA	NA	NA	NA	NA
chr15:72185305-72185518/-	NA	NA	NA	NA	89.32	73.913	NA	NA	NA	NA	NA	NA	NA	NA	NA	NA	NA	NA	NA	NA	NA	NA	NA	NA	NA	NA	NA	NA	NA	NA
chr15:72311379-72311436/-	NA	NA	NA	NA	NA	NA	NA	NA	NA	NA	NA	NA	NA	NA	NA	NA	56.835	26.667	NA	NA	NA	NA	NA	NA	NA	NA	NA	NA	NA	NA
chr15:72495362-72495529/-	NA	NA	NA	NA	NA	NA	NA	NA	6.024	3.822	NA	NA	NA	NA	NA	NA	NA	NA	NA	NA	NA	NA	NA	NA	NA	NA	NA	NA	NA	NA
chr15:72513508-72513625/-	NA	NA	1.039	0.232	NA	NA	NA	NA	NA	NA	NA	NA	2.136	0.517	NA	NA	100	0.807	NA	NA	NA	NA	NA	NA	NA	NA	NA	NA	NA	NA
chr15:72542519-72542550/-	1.955	0	NA	NA	NA	NA	NA	NA	NA	NA	NA	NA	NA	NA	NA	NA	NA	NA	NA	NA	NA	NA	NA	NA	NA	NA	NA	NA	NA	NA
chr15:72543185-72543295/-	72.871	65.653	NA	NA	NA	NA	NA	NA	NA	NA	NA	NA	NA	NA	NA	NA	NA	NA	NA	NA	NA	NA	NA	NA	NA	NA	NA	NA	NA	NA
chr15:72645408-72645519/-	NA	NA	NA	NA	NA	NA	NA	NA	NA	NA	NA	NA	100	97.053	NA	NA	NA	NA	NA	NA	NA	NA	NA	NA	NA	NA	NA	NA	NA	NA
chr15:72810407-72810475/+	NA	NA	NA	NA	NA	NA	100	96.914	NA	NA	NA	NA	NA	NA	NA	NA	NA	NA	NA	NA	NA	NA	NA	NA	NA	NA	NA	NA	NA	NA
chr15:72859446-72859518/+	NA	NA	100	98.009	NA	NA	NA	NA	NA	NA	NA	NA	NA	NA	NA	NA	NA	NA	NA	NA	NA	NA	NA	NA	NA	NA	NA	NA	NA	NA
chr15:73064123-73064186/-	NA	NA	NA	NA	NA	NA	NA	NA	NA	NA	NA	NA	NA	NA	NA	NA	97.917	87.778	100	94.915	NA	NA	NA	NA	NA	NA	NA	NA	100	96.124
chr15:74914460-74914557/+	NA	NA	NA	NA	NA	NA	NA	NA	NA	NA	NA	NA	NA	NA	NA	NA	93.333	65.027	NA	NA	NA	NA	NA	NA	NA	NA	NA	NA	NA	NA
chr15:75219106-75219228/-	100	97.683	NA	NA	99.52	97.649	NA	NA	NA	NA	NA	NA	NA	NA	NA	NA	NA	NA	NA	NA	NA	NA	NA	NA	NA	NA	NA	NA	NA	NA
chr15:75706545-75706652/-	NA	NA	NA	NA	NA	NA	NA	NA	NA	NA	NA	NA	NA	NA	NA	NA	100	98.822	NA	NA	NA	NA	NA	NA	NA	NA	NA	NA	NA	NA
chr15:76152218-76152323/+	NA	NA	NA	NA	NA	NA	NA	NA	NA	NA	NA	NA	NA	NA	NA	NA	NA	NA	NA	NA	88.387	66.667	NA	NA	NA	NA	NA	NA	100	61.429
chr15:76576097-76576166/-	NA	NA	NA	NA	NA	NA	NA	NA	NA	NA	NA	NA	NA	NA	NA	NA	NA	NA	NA	NA	100	97.721	NA	NA	NA	NA	NA	NA	NA	NA
chr15:76584771-76584854/-	99.845	99.417	99.94	99.618	NA	NA	NA	NA	NA	NA	100	99.398	NA	NA	100	99.258	NA	NA	NA	NA	NA	NA	NA	NA	NA	NA	NA	NA	NA	NA
chr15:76584771-76585041/-	NA	NA	NA	NA	NA	NA	NA	NA	NA	NA	100	99.433	NA	NA	100	99.186	NA	NA	NA	NA	NA	NA	NA	NA	NA	NA	NA	NA	NA	NA
chr15:76584959-76585041/-	NA	NA	NA	NA	NA	NA	NA	NA	NA	NA	NA	NA	NA	NA	99.491	98.288	NA	NA	NA	NA	NA	NA	NA	NA	NA	NA	NA	NA	NA	NA
chr15:77348130-77348205/-	NA	NA	NA	NA	NA	NA	NA	NA	NA	NA	100	99.453	NA	NA	NA	NA	NA	NA	NA	NA	NA	NA	NA	NA	NA	NA	NA	NA	NA	NA
chr15:77577299-77577420/-	NA	NA	100	60	NA	NA	NA	NA	NA	NA	96.396	86.25	NA	NA	NA	NA	NA	NA	NA	NA	100	68.75	NA	NA	100	35	NA	NA	92.308	35
chr15:78327031-78327081/-	NA	NA	17.857	2.062	NA	NA	NA	NA	NA	NA	NA	NA	NA	NA	NA	NA	NA	NA	NA	NA	NA	NA	NA	NA	NA	NA	NA	NA	NA	NA
chr15:78452433-78452548/+	NA	NA	NA	NA	NA	NA	NA	NA	100	93.305	NA	NA	99.16	96.671	NA	NA	NA	NA	NA	NA	NA	NA	NA	NA	NA	NA	NA	NA	NA	NA
chr15:78457333-78457418/+	NA	NA	NA	NA	NA	NA	NA	NA	NA	NA	NA	NA	99.804	98.762	NA	NA	NA	NA	NA	NA	NA	NA	NA	NA	NA	NA	NA	NA	NA	NA
chr15:79230027-79230165/-	NA	NA	NA	NA	NA	NA	NA	NA	NA	NA	NA	NA	5.631	2.503	NA	NA	NA	NA	NA	NA	NA	NA	NA	NA	NA	NA	NA	NA	NA	NA
chr15:81201437-81201647/+	NA	NA	NA	NA	NA	NA	NA	NA	100	98.102	NA	NA	NA	NA	NA	NA	NA	NA	NA	NA	NA	NA	NA	NA	NA	NA	NA	NA	NA	NA
chr15:83296888-83297307/-	NA	NA	NA	NA	NA	NA	35.714	0	NA	NA	NA	NA	NA	NA	NA	NA	NA	NA	NA	NA	NA	NA	NA	NA	NA	NA	NA	NA	NA	NA
chr15:83718824-83718930/-	NA	NA	NA	NA	NA	NA	98.958	94.757	NA	NA	NA	NA	NA	NA	NA	NA	NA	NA	NA	NA	NA	NA	NA	NA	NA	NA	NA	NA	NA	NA
chr15:85632568-85632647/+	NA	NA	NA	NA	NA	NA	100	91	NA	NA	NA	NA	97.26	87.097	NA	NA	NA	NA	NA	NA	100	82.759	NA	NA	NA	NA	NA	NA	NA	NA
chr15:85633948-85634146/+	29.412	4.07	NA	NA	NA	NA	NA	NA	NA	NA	NA	NA	27.66	10.236	NA	NA	NA	NA	NA	NA	33.333	0	NA	NA	NA	NA	NA	NA	NA	NA
chr15:85634274-85634412/+	NA	NA	NA	NA	NA	NA	NA	NA	NA	NA	NA	NA	NA	NA	NA	NA	NA	NA	NA	NA	100	60	NA	NA	NA	NA	NA	NA	NA	NA
chr15:85657103-85657268/+	100	98.98	NA	NA	100	96.517	NA	NA	NA	NA	NA	NA	100	96.197	NA	NA	NA	NA	NA	NA	NA	NA	NA	NA	NA	NA	NA	NA	NA	NA
chr15:85657103-85658504/+	100	97.814	NA	NA	NA	NA	NA	NA	NA	NA	NA	NA	100	92.283	NA	NA	NA	NA	NA	NA	NA	NA	NA	NA	NA	NA	NA	NA	NA	NA
chr15:85657103-85658718/+	100	99.183	NA	NA	NA	NA	NA	NA	NA	NA	NA	NA	NA	NA	NA	NA	NA	NA	NA	NA	NA	NA	NA	NA	NA	NA	NA	NA	NA	NA
chr15:85658669-85658718/+	100	99.242	NA	NA	100	96.111	NA	NA	NA	NA	NA	NA	100	96.302	NA	NA	NA	NA	NA	NA	NA	NA	NA	NA	NA	NA	NA	NA	NA	NA
chr15:85663704-85663814/+	11.082	7.955	NA	NA	NA	NA	NA	NA	NA	NA	NA	NA	NA	NA	NA	NA	NA	NA	NA	NA	NA	NA	NA	NA	NA	NA	NA	NA	NA	NA
chr15:85663761-85663814/+	9.49	5.514	NA	NA	NA	NA	NA	NA	NA	NA	NA	NA	NA	NA	NA	NA	NA	NA	NA	NA	NA	NA	NA	NA	NA	NA	NA	NA	NA	NA
chr15:85664027-85664245/+	NA	NA	99.87	99.236	NA	NA	NA	NA	NA	NA	NA	NA	NA	NA	NA	NA	NA	NA	NA	NA	NA	NA	NA	NA	NA	NA	NA	NA	NA	NA
chr15:86201767-86201821/+	NA	NA	NA	NA	NA	NA	NA	NA	NA	NA	NA	NA	NA	NA	NA	NA	NA	NA	NA	NA	NA	NA	NA	NA	NA	NA	NA	NA	75	33.333
chr15:86205618-86205684/+	NA	NA	NA	NA	NA	NA	NA	NA	NA	NA	NA	NA	NA	NA	NA	NA	NA	NA	NA	NA	39.785	10.345	NA	NA	NA	NA	NA	NA	NA	NA
chr15:87965965-87966067/-	NA	NA	NA	NA	NA	NA	82.4	36	NA	NA	NA	NA	NA	NA	NA	NA	NA	NA	NA	NA	NA	NA	NA	NA	NA	NA	NA	NA	NA	NA
chr15:87965965-87973353/-	NA	NA	NA	NA	NA	NA	82.114	38.462	NA	NA	NA	NA	NA	NA	NA	NA	NA	NA	NA	NA	NA	NA	NA	NA	NA	NA	NA	NA	NA	NA
chr15:88030832-88030894/-	NA	NA	NA	NA	NA	NA	16.923	0	NA	NA	NA	NA	NA	NA	NA	NA	NA	NA	NA	NA	NA	NA	NA	NA	NA	NA	NA	NA	NA	NA
chr15:89074601-89074704/-	100	68.182	NA	NA	NA	NA	NA	NA	NA	NA	NA	NA	NA	NA	NA	NA	NA	NA	NA	NA	NA	NA	NA	NA	NA	NA	NA	NA	NA	NA
chr15:89647133-89647275/+	NA	NA	27.778	8.333	NA	NA	NA	NA	NA	NA	NA	NA	NA	NA	NA	NA	NA	NA	NA	NA	NA	NA	NA	NA	NA	NA	NA	NA	NA	NA
chr15:89647412-89647501/+	NA	NA	32.075	0	NA	NA	NA	NA	NA	NA	NA	NA	NA	NA	NA	NA	NA	NA	NA	NA	NA	NA	NA	NA	NA	NA	NA	NA	NA	NA
chr15:89811629-89811756/+	100	98.85	99.885	99.04	NA	NA	99.156	98.294	NA	NA	NA	NA	99.232	96.914	NA	NA	NA	NA	NA	NA	NA	NA	NA	NA	NA	NA	NA	NA	NA	NA
chr15:89816607-89816700/+	NA	NA	100	99.37	NA	NA	NA	NA	NA	NA	NA	NA	NA	NA	NA	NA	NA	NA	NA	NA	NA	NA	NA	NA	NA	NA	NA	NA	NA	NA
chr15:89821917-89822005/+	100	97.593	NA	NA	NA	NA	NA	NA	NA	NA	NA	NA	NA	NA	NA	NA	NA	NA	NA	NA	NA	NA	NA	NA	NA	NA	NA	NA	NA	NA
chr15:89824995-89826481/+	NA	NA	100	99.45	NA	NA	NA	NA	NA	NA	NA	NA	NA	NA	NA	NA	NA	NA	NA	NA	NA	NA	NA	NA	NA	NA	NA	NA	NA	NA
chr15:89826366-89826481/+	NA	NA	100	99.408	NA	NA	NA	NA	NA	NA	NA	NA	NA	NA	NA	NA	NA	NA	NA	NA	NA	NA	NA	NA	NA	NA	NA	NA	NA	NA
chr15:89837063-89837228/+	100	95.889	100	97.066	NA	NA	NA	NA	NA	NA	NA	NA	NA	NA	NA	NA	NA	NA	NA	NA	NA	NA	NA	NA	NA	NA	NA	NA	NA	NA
chr15:89838145-89838325/+	NA	NA	98.556	94.238	NA	NA	NA	NA	NA	NA	NA	NA	NA	NA	NA	NA	NA	NA	NA	NA	NA	NA	NA	NA	NA	NA	NA	NA	NA	NA
chr15:89838187-89838325/+	NA	NA	96.396	88.506	NA	NA	NA	NA	NA	NA	NA	NA	NA	NA	NA	NA	NA	NA	NA	NA	NA	NA	NA	NA	NA	NA	NA	NA	NA	NA
chr15:90420537-90420656/-	NA	NA	19.753	9.41	18.75	7.246	NA	NA	NA	NA	NA	NA	NA	NA	14.286	4.444	NA	NA	NA	NA	NA	NA	NA	NA	NA	NA	87.5	3.583	45.946	0
chr15:90421496-90421532/-	NA	NA	9.189	0	NA	NA	6.25	0	NA	NA	NA	NA	NA	NA	NA	NA	NA	NA	NA	NA	NA	NA	NA	NA	NA	NA	NA	NA	NA	NA
chr15:90633710-90633876/-	NA	NA	NA	NA	NA	NA	NA	NA	NA	NA	100	99.375	NA	NA	NA	NA	NA	NA	NA	NA	NA	NA	NA	NA	NA	NA	NA	NA	NA	NA
chr15:90764213-90764325/+	NA	NA	NA	NA	NA	NA	NA	NA	NA	NA	NA	NA	NA	NA	100	99.047	NA	NA	NA	NA	NA	NA	NA	NA	NA	NA	NA	NA	NA	NA
chr15:90991804-90991968/+	100	98.923	NA	NA	NA	NA	NA	NA	NA	NA	NA	NA	NA	NA	NA	NA	NA	NA	NA	NA	NA	NA	NA	NA	NA	NA	NA	NA	NA	NA
chr15:90992790-90992875/+	100	99.018	NA	NA	NA	NA	NA	NA	NA	NA	NA	NA	NA	NA	NA	NA	NA	NA	NA	NA	NA	NA	NA	NA	NA	NA	NA	NA	NA	NA
chr15:91513633-91513744/-	NA	NA	98.942	95.164	NA	NA	NA	NA	NA	NA	NA	NA	NA	NA	NA	NA	NA	NA	NA	NA	NA	NA	NA	NA	NA	NA	NA	NA	NA	NA
chr15:99857668-99857751/+	NA	NA	7.082	0	NA	NA	NA	NA	NA	NA	NA	NA	NA	NA	NA	NA	NA	NA	NA	NA	NA	NA	NA	NA	NA	NA	NA	NA	NA	NA
chr15:99900422-99900491/+	4.727	0	NA	NA	NA	NA	NA	NA	NA	NA	NA	NA	NA	NA	NA	NA	NA	NA	NA	NA	NA	NA	NA	NA	NA	NA	NA	NA	NA	NA
chr16:11785145-11785938/-	NA	NA	100	95.19	NA	NA	NA	NA	NA	NA	NA	NA	NA	NA	NA	NA	NA	NA	NA	NA	NA	NA	NA	NA	NA	NA	NA	NA	NA	NA
chr16:11824500-11824630/-	NA	NA	NA	NA	NA	NA	NA	NA	100	91.034	NA	NA	NA	NA	NA	NA	NA	NA	NA	NA	92.308	80.062	NA	NA	NA	NA	NA	NA	NA	NA
chr16:11827837-11827935/-	NA	NA	NA	NA	NA	NA	NA	NA	NA	NA	NA	NA	100	96.673	NA	NA	NA	NA	NA	NA	NA	NA	NA	NA	NA	NA	NA	NA	NA	NA
chr16:11862886-11862951/-	NA	NA	100	85.946	NA	NA	NA	NA	NA	NA	NA	NA	NA	NA	NA	NA	NA	NA	NA	NA	NA	NA	NA	NA	NA	NA	NA	NA	NA	NA
chr16:1412038-1412132/+	NA	NA	100	96.795	NA	NA	NA	NA	NA	NA	NA	NA	NA	NA	NA	NA	NA	NA	NA	NA	NA	NA	NA	NA	NA	NA	NA	NA	NA	NA
chr16:14647921-14648008/-	NA	NA	NA	NA	NA	NA	NA	NA	NA	NA	NA	NA	100	95.285	100	96.763	NA	NA	NA	NA	NA	NA	NA	NA	NA	NA	NA	NA	NA	NA
chr16:14721125-14721193/-	NA	NA	100	93.434	NA	NA	NA	NA	NA	NA	NA	NA	NA	NA	NA	NA	NA	NA	NA	NA	NA	NA	NA	NA	NA	NA	NA	NA	NA	NA
chr16:15141711-15141777/-	NA	NA	100	96.016	NA	NA	NA	NA	NA	NA	NA	NA	NA	NA	NA	NA	NA	NA	NA	NA	NA	NA	NA	NA	NA	NA	NA	NA	NA	NA
chr16:16103632-16103758/+	99.577	97.909	NA	NA	NA	NA	NA	NA	NA	NA	NA	NA	NA	NA	NA	NA	NA	NA	NA	NA	NA	NA	NA	NA	NA	NA	NA	NA	NA	NA
chr16:16110440-16110478/+	95.997	0	NA	NA	NA	NA	NA	NA	91.045	0	NA	NA	NA	NA	NA	NA	NA	NA	NA	NA	NA	NA	NA	NA	NA	NA	NA	NA	NA	NA
chr16:16173208-16173335/+	NA	NA	NA	NA	NA	NA	NA	NA	NA	NA	NA	NA	NA	NA	NA	NA	100	95.541	NA	NA	NA	NA	NA	NA	NA	NA	NA	NA	NA	NA
chr16:1618217-1618335/-	100	85.075	NA	NA	NA	NA	NA	NA	NA	NA	NA	NA	NA	NA	NA	NA	NA	NA	NA	NA	NA	NA	NA	NA	NA	NA	NA	NA	NA	NA
chr16:16192729-16192759/+	2.994	1.215	NA	NA	NA	NA	NA	NA	NA	NA	NA	NA	NA	NA	NA	NA	NA	NA	2.2	0	NA	NA	NA	NA	NA	NA	NA	NA	NA	NA
chr16:16218645-16218772/+	NA	NA	NA	NA	NA	NA	NA	NA	96.889	88.925	NA	NA	NA	NA	NA	NA	NA	NA	NA	NA	NA	NA	NA	NA	NA	NA	NA	NA	NA	NA
chr16:16219666-16219768/+	NA	NA	NA	NA	NA	NA	NA	NA	100	94.677	NA	NA	NA	NA	NA	NA	NA	NA	NA	NA	NA	NA	NA	NA	NA	NA	NA	NA	NA	NA
chr16:167299-167374/-	NA	NA	NA	NA	NA	NA	78.571	58.17	NA	NA	NA	NA	NA	NA	NA	NA	NA	NA	NA	NA	NA	NA	NA	NA	NA	NA	NA	NA	NA	NA
chr16:1741843-1741986/+	NA	NA	NA	NA	NA	NA	NA	NA	100	96.779	NA	NA	NA	NA	NA	NA	NA	NA	NA	NA	NA	NA	NA	NA	NA	NA	NA	NA	NA	NA
chr16:18716430-18716506/-	NA	NA	NA	NA	NA	NA	58.333	0	NA	NA	NA	NA	NA	NA	NA	NA	NA	NA	NA	NA	NA	NA	NA	NA	NA	NA	NA	NA	NA	NA
chr16:18841540-18841691/-	NA	NA	NA	NA	NA	NA	NA	NA	NA	NA	NA	NA	NA	NA	100	95.074	NA	NA	NA	NA	NA	NA	NA	NA	NA	NA	NA	NA	NA	NA
chr16:18871394-18871532/-	NA	NA	NA	NA	35.78	13.115	NA	NA	NA	NA	NA	NA	NA	NA	NA	NA	NA	NA	NA	NA	NA	NA	NA	NA	NA	NA	NA	NA	NA	NA
chr16:19623049-19623120/+	NA	NA	NA	NA	NA	NA	NA	NA	NA	NA	1.401	0.144	NA	NA	NA	NA	NA	NA	NA	NA	NA	NA	NA	NA	NA	NA	NA	NA	NA	NA
chr16:19627721-19628130/+	NA	NA	NA	NA	NA	NA	NA	NA	NA	NA	NA	NA	NA	NA	94.059	0	NA	NA	NA	NA	NA	NA	NA	NA	NA	NA	NA	NA	NA	NA
chr16:19628007-19628130/+	NA	NA	NA	NA	NA	NA	NA	NA	NA	NA	NA	NA	NA	NA	NA	NA	NA	NA	NA	NA	97.682	91.772	NA	NA	NA	NA	NA	NA	NA	NA
chr16:19664737-19664781/+	6.207	0	NA	NA	NA	NA	NA	NA	NA	NA	NA	NA	NA	NA	NA	NA	NA	NA	NA	NA	NA	NA	NA	NA	NA	NA	NA	NA	NA	NA
chr16:20835760-20835849/+	NA	NA	NA	NA	100	66.667	NA	NA	100	36	NA	NA	NA	NA	NA	NA	NA	NA	NA	NA	NA	NA	NA	NA	NA	NA	NA	NA	NA	NA
chr16:2105402-2105520/+	NA	NA	NA	NA	NA	NA	NA	NA	100	93.023	NA	NA	NA	NA	NA	NA	NA	NA	NA	NA	NA	NA	NA	NA	NA	NA	NA	NA	NA	NA
chr16:23118651-23118735/-	NA	NA	NA	NA	30.526	15.966	NA	NA	NA	NA	NA	NA	NA	NA	NA	NA	NA	NA	NA	NA	NA	NA	NA	NA	NA	NA	NA	NA	NA	NA
chr16:23668806-23668907/+	NA	NA	4.084	2.063	NA	NA	NA	NA	NA	NA	NA	NA	NA	NA	NA	NA	NA	NA	NA	NA	NA	NA	NA	NA	NA	NA	NA	NA	NA	NA
chr16:24789664-24789789/+	NA	NA	NA	NA	23.75	7.08	NA	NA	NA	NA	NA	NA	NA	NA	NA	NA	NA	NA	NA	NA	NA	NA	NA	NA	NA	NA	NA	NA	NA	NA
chr16:24804793-24804970/+	NA	NA	48.387	32.515	NA	NA	NA	NA	NA	NA	NA	NA	NA	NA	NA	NA	NA	NA	NA	NA	NA	NA	NA	NA	NA	NA	NA	NA	NA	NA
chr16:2482961-2483068/+	NA	NA	100	86.301	NA	NA	NA	NA	NA	NA	NA	NA	NA	NA	NA	NA	NA	NA	NA	NA	NA	NA	NA	NA	NA	NA	NA	NA	NA	NA
chr16:25154511-25154667/+	3.468	0.571	NA	NA	NA	NA	NA	NA	NA	NA	NA	NA	NA	NA	NA	NA	NA	NA	NA	NA	NA	NA	NA	NA	NA	NA	NA	NA	NA	NA
chr16:2611746-2611909/+	NA	NA	NA	NA	97.5	0	NA	NA	NA	NA	NA	NA	NA	NA	NA	NA	NA	NA	NA	NA	NA	NA	NA	NA	NA	NA	NA	NA	NA	NA
chr16:2611771-2611909/+	NA	NA	NA	NA	98.456	84.158	NA	NA	NA	NA	92.063	77.5	NA	NA	NA	NA	NA	NA	92	77.143	NA	NA	NA	NA	NA	NA	NA	NA	NA	NA
chr16:2616356-2616454/+	NA	NA	NA	NA	98.425	90.741	NA	NA	NA	NA	NA	NA	NA	NA	NA	NA	NA	NA	NA	NA	NA	NA	NA	NA	NA	NA	NA	NA	NA	NA
chr16:2679004-2679119/-	NA	NA	7.784	0	NA	NA	NA	NA	NA	NA	NA	NA	NA	NA	NA	NA	NA	NA	NA	NA	NA	NA	NA	NA	NA	NA	NA	NA	NA	NA
chr16:27352390-27352634/+	NA	NA	NA	NA	NA	NA	NA	NA	NA	NA	NA	NA	NA	NA	NA	NA	NA	NA	NA	NA	2.818	0	NA	NA	NA	NA	NA	NA	NA	NA
chr16:28123137-28123327/-	NA	NA	99.142	97.176	NA	NA	NA	NA	NA	NA	NA	NA	NA	NA	NA	NA	NA	NA	NA	NA	NA	NA	NA	NA	NA	NA	NA	NA	NA	NA
chr16:28128638-28128783/-	NA	NA	NA	NA	NA	NA	NA	NA	99.875	99.011	NA	NA	NA	NA	100	99.361	98.621	97.229	NA	NA	NA	NA	NA	NA	NA	NA	NA	NA	NA	NA
chr16:28499911-28499983/-	NA	NA	NA	NA	NA	NA	NA	NA	NA	NA	99.273	92.042	NA	NA	NA	NA	NA	NA	NA	NA	NA	NA	NA	NA	NA	NA	NA	NA	NA	NA
chr16:28607103-28607255/-	NA	NA	86.175	63.636	NA	NA	NA	NA	NA	NA	NA	NA	NA	NA	NA	NA	NA	NA	NA	NA	NA	NA	NA	NA	NA	NA	NA	NA	NA	NA
chr16:28619611-28619709/-	NA	NA	93.21	86.335	NA	NA	NA	NA	NA	NA	NA	NA	NA	NA	NA	NA	NA	NA	NA	NA	NA	NA	NA	NA	NA	NA	NA	NA	NA	NA
chr16:28838182-28838307/+	98	95.041	NA	NA	NA	NA	NA	NA	NA	NA	NA	NA	NA	NA	NA	NA	NA	NA	NA	NA	NA	NA	NA	NA	NA	NA	NA	NA	NA	NA
chr16:28993221-28993377/+	96.629	87.692	NA	NA	NA	NA	NA	NA	NA	NA	NA	NA	NA	NA	NA	NA	NA	NA	NA	NA	NA	NA	NA	NA	NA	NA	NA	NA	NA	NA
chr16:29917108-29917280/+	NA	NA	NA	NA	100	92.829	NA	NA	NA	NA	NA	NA	NA	NA	NA	NA	NA	NA	NA	NA	NA	NA	NA	NA	NA	NA	NA	NA	NA	NA
chr16:30665949-30666535/+	NA	NA	100	75.758	NA	NA	NA	NA	NA	NA	NA	NA	NA	NA	NA	NA	NA	NA	NA	NA	NA	NA	NA	NA	NA	NA	NA	NA	NA	NA
chr16:3722700-3722821/-	NA	NA	NA	NA	NA	NA	NA	NA	NA	NA	NA	NA	NA	NA	NA	NA	100	99.117	NA	NA	NA	NA	NA	NA	NA	NA	NA	NA	NA	NA
chr16:46715990-46716087/-	NA	NA	NA	NA	NA	NA	NA	NA	NA	NA	NA	NA	NA	NA	100	97.998	NA	NA	NA	NA	NA	NA	NA	NA	NA	NA	NA	NA	NA	NA
chr16:47596308-47596406/+	NA	NA	NA	NA	NA	NA	NA	NA	NA	NA	NA	NA	7.266	2.338	NA	NA	NA	NA	NA	NA	NA	NA	NA	NA	NA	NA	NA	NA	NA	NA
chr16:47614205-47614269/+	NA	NA	100	97.902	NA	NA	NA	NA	NA	NA	NA	NA	NA	NA	NA	NA	NA	NA	NA	NA	NA	NA	NA	NA	NA	NA	NA	NA	NA	NA
chr16:47699852-47699943/+	100	94.253	NA	NA	NA	NA	96.564	88.56	NA	NA	NA	NA	NA	NA	NA	NA	NA	NA	NA	NA	NA	NA	NA	NA	NA	NA	NA	NA	NA	NA
chr16:48290520-48290652/+	NA	NA	89.552	81.818	NA	NA	NA	NA	NA	NA	98.413	94.182	NA	NA	NA	NA	NA	NA	NA	NA	NA	NA	NA	NA	NA	NA	NA	NA	NA	NA
chr16:4851267-4851322/-	NA	NA	NA	NA	NA	NA	NA	NA	95	77.707	NA	NA	NA	NA	NA	NA	NA	NA	NA	NA	NA	NA	NA	NA	NA	NA	NA	NA	NA	NA
chr16:4881979-4882222/-	NA	NA	NA	NA	100	83.886	NA	NA	NA	NA	NA	NA	NA	NA	NA	NA	NA	NA	NA	NA	NA	NA	NA	NA	NA	NA	NA	NA	NA	NA
chr16:49765208-49765372/-	NA	NA	NA	NA	NA	NA	NA	NA	NA	NA	NA	NA	NA	NA	NA	NA	NA	NA	NA	NA	NA	NA	NA	NA	NA	NA	NA	NA	68.421	7.965
chr16:49838399-49838587/-	NA	NA	NA	NA	NA	NA	NA	NA	NA	NA	NA	NA	NA	NA	NA	NA	NA	NA	NA	NA	NA	NA	NA	NA	26.829	1.538	NA	NA	58.696	1.538
chr16:49839494-49839680/-	NA	NA	NA	NA	NA	NA	NA	NA	NA	NA	NA	NA	NA	NA	NA	NA	NA	NA	NA	NA	NA	NA	NA	NA	73.684	10	NA	NA	91.453	10
chr16:50063635-50063709/+	NA	NA	NA	NA	NA	NA	NA	NA	NA	NA	99.273	93.989	NA	NA	NA	NA	NA	NA	NA	NA	NA	NA	NA	NA	NA	NA	NA	NA	NA	NA
chr16:5077278-5077380/-	NA	NA	NA	NA	NA	NA	NA	NA	100	96.774	NA	NA	NA	NA	NA	NA	NA	NA	NA	NA	NA	NA	NA	NA	NA	NA	NA	NA	NA	NA
chr16:53188358-53188455/+	NA	NA	NA	NA	NA	NA	NA	NA	NA	NA	24.823	0	NA	NA	27.778	12.042	NA	NA	19.481	0	NA	NA	NA	NA	NA	NA	NA	NA	NA	NA
chr16:53908486-53908557/+	NA	NA	NA	NA	1.728	0	NA	NA	NA	NA	NA	NA	NA	NA	NA	NA	NA	NA	NA	NA	NA	NA	NA	NA	NA	NA	NA	NA	NA	NA
chr16:53908486-53908591/+	NA	NA	NA	NA	1.728	0	NA	NA	NA	NA	NA	NA	NA	NA	NA	NA	NA	NA	NA	NA	NA	NA	NA	NA	NA	NA	NA	NA	16.418	0
chr16:541133-541268/+	NA	NA	NA	NA	NA	NA	NA	NA	41.593	19.54	96.825	76.471	NA	NA	NA	NA	NA	NA	NA	NA	NA	NA	NA	NA	NA	NA	NA	NA	100	54.545
chr16:55730136-55730249/+	NA	NA	NA	NA	92.492	71.681	NA	NA	NA	NA	NA	NA	NA	NA	NA	NA	NA	NA	NA	NA	NA	NA	NA	NA	NA	NA	NA	NA	NA	NA
chr16:55733465-55733566/+	NA	NA	NA	NA	99.63	94.783	NA	NA	NA	NA	NA	NA	NA	NA	NA	NA	NA	NA	NA	NA	NA	NA	NA	NA	NA	NA	NA	NA	NA	NA
chr16:56913453-56913561/+	NA	NA	94.323	82.673	NA	NA	NA	NA	NA	NA	NA	NA	NA	NA	NA	NA	NA	NA	NA	NA	NA	NA	NA	NA	NA	NA	NA	NA	NA	NA
chr16:56914041-56914165/+	NA	NA	89.47	84.759	NA	NA	NA	NA	NA	NA	NA	NA	NA	NA	NA	NA	NA	NA	NA	NA	NA	NA	NA	NA	NA	NA	NA	NA	NA	NA
chr16:56973148-56973271/+	NA	NA	NA	NA	NA	NA	NA	NA	NA	NA	100	98.369	NA	NA	NA	NA	NA	NA	NA	NA	NA	NA	NA	NA	NA	NA	NA	NA	NA	NA
chr16:56973806-56974000/+	NA	NA	NA	NA	NA	NA	NA	NA	NA	NA	100	97.963	NA	NA	100	96.125	NA	NA	NA	NA	NA	NA	NA	NA	NA	NA	NA	NA	NA	NA
chr16:56973806-56974157/+	NA	NA	NA	NA	NA	NA	NA	NA	NA	NA	100	98.8	NA	NA	NA	NA	NA	NA	NA	NA	NA	NA	NA	NA	NA	NA	NA	NA	NA	NA
chr16:57091976-57092060/+	NA	NA	NA	NA	NA	NA	NA	NA	NA	NA	NA	NA	98.496	91.045	NA	NA	NA	NA	NA	NA	NA	NA	NA	NA	NA	NA	NA	NA	NA	NA
chr16:58561826-58562009/-	NA	NA	100	0.827	NA	NA	NA	NA	NA	NA	NA	NA	NA	NA	NA	NA	NA	NA	NA	NA	NA	NA	NA	NA	NA	NA	NA	NA	NA	NA
chr16:58581469-58581586/-	100	98.757	NA	NA	NA	NA	NA	NA	NA	NA	NA	NA	NA	NA	NA	NA	NA	NA	NA	NA	NA	NA	NA	NA	NA	NA	NA	NA	NA	NA
chr16:58704948-58706147/-	NA	NA	NA	NA	NA	NA	NA	NA	NA	NA	NA	NA	NA	NA	NA	NA	NA	NA	NA	NA	99.633	93.305	NA	NA	NA	NA	NA	NA	NA	NA
chr16:58705999-58706147/-	NA	NA	NA	NA	NA	NA	NA	NA	NA	NA	NA	NA	NA	NA	NA	NA	NA	NA	NA	NA	99.594	94.788	NA	NA	NA	NA	NA	NA	NA	NA
chr16:66643337-66643433/+	NA	NA	NA	NA	NA	NA	NA	NA	100	97.297	NA	NA	NA	NA	NA	NA	NA	NA	NA	NA	NA	NA	NA	NA	NA	NA	NA	NA	NA	NA
chr16:67100584-67100701/+	NA	NA	NA	NA	NA	NA	NA	NA	NA	NA	100	96.183	NA	NA	NA	NA	NA	NA	NA	NA	NA	NA	NA	NA	NA	NA	NA	NA	NA	NA
chr16:67644726-67645516/+	NA	NA	NA	NA	NA	NA	NA	NA	NA	NA	100	91.597	NA	NA	NA	NA	NA	NA	NA	NA	NA	NA	NA	NA	NA	NA	NA	NA	NA	NA
chr16:67645853-67646024/+	98.708	92.606	NA	NA	NA	NA	NA	NA	NA	NA	100	96.35	100	95.99	NA	NA	NA	NA	NA	NA	NA	NA	NA	NA	NA	NA	NA	NA	NA	NA
chr16:67768760-67768945/-	NA	NA	NA	NA	NA	NA	NA	NA	100	96.532	NA	NA	NA	NA	NA	NA	NA	NA	NA	NA	NA	NA	NA	NA	NA	NA	NA	NA	NA	NA
chr16:67793475-67793635/-	NA	NA	100	3.333	NA	NA	NA	NA	NA	NA	NA	NA	NA	NA	NA	NA	NA	NA	NA	NA	NA	NA	NA	NA	NA	NA	NA	NA	NA	NA
chr16:67988006-67988122/-	NA	NA	5.959	1.215	NA	NA	NA	NA	NA	NA	NA	NA	NA	NA	NA	NA	NA	NA	NA	NA	NA	NA	NA	NA	NA	NA	NA	NA	NA	NA
chr16:68088476-68088520/+	NA	NA	NA	NA	NA	NA	NA	NA	NA	NA	NA	NA	NA	NA	NA	NA	100	92.308	NA	NA	NA	NA	NA	NA	NA	NA	NA	NA	NA	NA
chr16:68172413-68172485/+	NA	NA	NA	NA	NA	NA	8.168	2.954	NA	NA	NA	NA	NA	NA	NA	NA	NA	NA	NA	NA	NA	NA	NA	NA	NA	NA	NA	NA	NA	NA
chr16:68307697-68307807/+	24.952	15.315	NA	NA	NA	NA	NA	NA	NA	NA	NA	NA	NA	NA	NA	NA	NA	NA	NA	NA	NA	NA	NA	NA	NA	NA	NA	NA	NA	NA
chr16:68307720-68307807/+	NA	NA	NA	NA	NA	NA	NA	NA	NA	NA	NA	NA	NA	NA	43.558	35.211	NA	NA	NA	NA	NA	NA	NA	NA	NA	NA	NA	NA	40.741	14.667
chr16:68308593-68308779/+	NA	NA	NA	NA	NA	NA	NA	NA	NA	NA	100	93.305	100	92.248	100	96.581	NA	NA	NA	NA	NA	NA	NA	NA	NA	NA	NA	NA	NA	NA
chr16:68308593-68309152/+	NA	NA	NA	NA	NA	NA	NA	NA	NA	NA	100	96.596	NA	NA	100	98.354	NA	NA	NA	NA	NA	NA	NA	NA	NA	NA	NA	NA	NA	NA
chr16:68308927-68309152/+	NA	NA	96.53	93.605	NA	NA	NA	NA	NA	NA	NA	NA	NA	NA	NA	NA	NA	NA	NA	NA	NA	NA	NA	NA	NA	NA	NA	NA	NA	NA
chr16:68321648-68321774/+	NA	NA	NA	NA	NA	NA	100	97.895	NA	NA	NA	NA	NA	NA	NA	NA	NA	NA	NA	NA	NA	NA	NA	NA	NA	NA	NA	NA	NA	NA
chr16:68325111-68325235/+	NA	NA	NA	NA	98.639	90.345	NA	NA	NA	NA	NA	NA	NA	NA	NA	NA	NA	NA	NA	NA	NA	NA	NA	NA	NA	NA	NA	NA	NA	NA
chr16:68325111-68325564/+	NA	NA	99.878	98.536	NA	NA	NA	NA	NA	NA	NA	NA	NA	NA	NA	NA	NA	NA	NA	NA	NA	NA	NA	NA	NA	NA	NA	NA	NA	NA
chr16:69173727-69173817/+	NA	NA	NA	NA	NA	NA	NA	NA	NA	NA	NA	NA	NA	NA	NA	NA	100	98.4	NA	NA	NA	NA	NA	NA	NA	NA	NA	NA	NA	NA
chr16:69188295-69188360/+	NA	NA	NA	NA	NA	NA	NA	NA	NA	NA	NA	NA	NA	NA	NA	NA	100	73.913	NA	NA	NA	NA	NA	NA	NA	NA	NA	NA	NA	NA
chr16:69190986-69191143/+	NA	NA	NA	NA	NA	NA	NA	NA	NA	NA	NA	NA	NA	NA	NA	NA	100	91.598	NA	NA	NA	NA	NA	NA	NA	NA	NA	NA	NA	NA
chr16:69196985-69197081/+	NA	NA	100	99.583	NA	NA	100	99.117	NA	NA	NA	NA	NA	NA	NA	NA	99.862	99.138	NA	NA	100	99.154	NA	NA	NA	NA	NA	NA	NA	NA
chr16:69293952-69294163/+	NA	NA	NA	NA	NA	NA	NA	NA	NA	NA	100	97.881	NA	NA	NA	NA	NA	NA	NA	NA	NA	NA	NA	NA	NA	NA	NA	NA	NA	NA
chr16:69294073-69294163/+	NA	NA	NA	NA	NA	NA	NA	NA	NA	NA	100	0	NA	NA	NA	NA	NA	NA	NA	NA	NA	NA	NA	NA	NA	NA	NA	NA	NA	NA
chr16:69681211-69681319/+	41.047	0	NA	NA	NA	NA	NA	NA	NA	NA	NA	NA	NA	NA	NA	NA	NA	NA	NA	NA	NA	NA	NA	NA	NA	NA	NA	NA	NA	NA
chr16:69681211-69681489/+	NA	NA	NA	NA	NA	NA	NA	NA	NA	NA	49.474	0	NA	NA	NA	NA	NA	NA	NA	NA	NA	NA	NA	NA	NA	NA	NA	NA	NA	NA
chr16:69681448-69681489/+	75.207	0	NA	NA	NA	NA	NA	NA	NA	NA	NA	NA	NA	NA	NA	NA	NA	NA	NA	NA	NA	NA	NA	NA	NA	NA	NA	NA	NA	NA
chr16:69786143-69786274/-	NA	NA	NA	NA	NA	NA	NA	NA	NA	NA	NA	NA	NA	NA	NA	NA	NA	NA	100	93.345	NA	NA	NA	NA	NA	NA	NA	NA	NA	NA
chr16:70177412-70177561/+	NA	NA	98.112	93.564	NA	NA	NA	NA	NA	NA	98.601	92.199	NA	NA	NA	NA	NA	NA	NA	NA	NA	NA	NA	NA	NA	NA	NA	NA	NA	NA
chr16:70179579-70179651/+	NA	NA	NA	NA	NA	NA	NA	NA	NA	NA	NA	NA	NA	NA	1.815	0	NA	NA	NA	NA	NA	NA	NA	NA	NA	NA	NA	NA	NA	NA
chr16:70291935-70292120/-	NA	NA	NA	NA	NA	NA	NA	NA	NA	NA	NA	NA	100	97.947	NA	NA	NA	NA	NA	NA	NA	NA	NA	NA	NA	NA	NA	NA	NA	NA
chr16:70296248-70296427/-	NA	NA	NA	NA	NA	NA	NA	NA	NA	NA	NA	NA	NA	NA	NA	NA	NA	NA	NA	NA	100	97.945	NA	NA	NA	NA	NA	NA	NA	NA
chr16:70501788-70501869/+	NA	NA	NA	NA	NA	NA	NA	NA	98.333	79.817	95.918	69.231	NA	NA	NA	NA	NA	NA	NA	NA	NA	NA	NA	NA	NA	NA	NA	NA	NA	NA
chr16:70503054-70503226/+	NA	NA	NA	NA	90.769	61.194	NA	NA	NA	NA	NA	NA	NA	NA	NA	NA	NA	NA	NA	NA	NA	NA	NA	NA	NA	NA	NA	NA	NA	NA
chr16:71697801-71698002/-	NA	NA	NA	NA	99.504	90.345	NA	NA	NA	NA	NA	NA	NA	NA	NA	NA	NA	NA	NA	NA	NA	NA	NA	NA	NA	NA	NA	NA	NA	NA
chr16:71782153-71782281/-	NA	NA	100	97.722	NA	NA	100	98.003	NA	NA	NA	NA	NA	NA	NA	NA	NA	NA	NA	NA	NA	NA	NA	NA	NA	NA	NA	NA	NA	NA
chr16:71801779-71801788/-	32.193	23.67	27.66	19.374	51.515	37.624	NA	NA	17.557	9.091	26.524	17.431	NA	NA	NA	NA	NA	NA	44.322	22.977	NA	NA	NA	NA	NA	NA	NA	NA	93.443	52
chr16:71806862-71806956/-	NA	NA	NA	NA	NA	NA	NA	NA	8.148	1.316	NA	NA	NA	NA	NA	NA	NA	NA	NA	NA	NA	NA	NA	NA	NA	NA	NA	NA	NA	NA
chr16:74670243-74670475/-	100	95.516	NA	NA	NA	NA	100	98.459	100	92.787	NA	NA	99.365	95.833	NA	NA	NA	NA	NA	NA	NA	NA	NA	NA	NA	NA	NA	NA	NA	NA
chr16:74671753-74671868/-	100	96.273	NA	NA	NA	NA	NA	NA	97.753	84.553	NA	NA	NA	NA	NA	NA	NA	NA	NA	NA	NA	NA	NA	NA	NA	NA	NA	NA	NA	NA
chr16:74923600-74923713/-	NA	NA	NA	NA	NA	NA	NA	NA	NA	NA	NA	NA	NA	NA	100	96.078	NA	NA	NA	NA	NA	NA	NA	NA	NA	NA	NA	NA	NA	NA
chr16:74951826-74951906/-	100	97.788	NA	NA	NA	NA	NA	NA	NA	NA	NA	NA	NA	NA	NA	NA	NA	NA	NA	NA	NA	NA	NA	NA	NA	NA	NA	NA	NA	NA
chr16:74972047-74972164/-	NA	NA	NA	NA	NA	NA	100	97.227	NA	NA	NA	NA	NA	NA	NA	NA	NA	NA	NA	NA	NA	NA	NA	NA	NA	NA	NA	NA	NA	NA
chr16:74990372-74990508/-	100	91.129	NA	NA	100	94.958	NA	NA	NA	NA	NA	NA	100	94.574	NA	NA	NA	NA	NA	NA	NA	NA	NA	NA	NA	NA	NA	NA	NA	NA
chr16:75642121-75642221/-	NA	NA	100	81.022	NA	NA	NA	NA	NA	NA	NA	NA	NA	NA	NA	NA	NA	NA	NA	NA	NA	NA	NA	NA	NA	NA	NA	NA	NA	NA
chr16:75642740-75642886/-	NA	NA	100	85.714	NA	NA	NA	NA	NA	NA	NA	NA	NA	NA	NA	NA	NA	NA	NA	NA	NA	NA	NA	NA	NA	NA	NA	NA	NA	NA
chr16:7905126-7905165/-	NA	NA	NA	NA	NA	NA	100	94.749	NA	NA	NA	NA	NA	NA	NA	NA	NA	NA	NA	NA	NA	NA	NA	NA	NA	NA	NA	NA	NA	NA
chr16:7929540-7929773/-	NA	NA	NA	NA	NA	NA	38.053	23.853	NA	NA	NA	NA	NA	NA	NA	NA	NA	NA	NA	NA	NA	NA	NA	NA	NA	NA	NA	NA	NA	NA
chr16:7929540-7929796/-	NA	NA	NA	NA	NA	NA	38.596	15.09	NA	NA	NA	NA	NA	NA	NA	NA	NA	NA	NA	NA	NA	NA	NA	NA	NA	NA	NA	NA	NA	NA
chr16:81056201-81056303/+	70.746	49.279	NA	NA	NA	NA	NA	NA	NA	NA	NA	NA	NA	NA	NA	NA	NA	NA	NA	NA	NA	NA	NA	NA	NA	NA	NA	NA	NA	NA
chr16:81739103-81739209/+	99.069	95.252	NA	NA	NA	NA	NA	NA	NA	NA	NA	NA	NA	NA	NA	NA	NA	NA	NA	NA	NA	NA	NA	NA	NA	NA	NA	NA	NA	NA
chr16:84118587-84118739/-	NA	NA	NA	NA	NA	NA	NA	NA	100	97.379	NA	NA	NA	NA	NA	NA	NA	NA	NA	NA	NA	NA	NA	NA	NA	NA	NA	NA	NA	NA
chr16:84773914-84773975/+	NA	NA	87.349	80.709	NA	NA	NA	NA	NA	NA	NA	NA	NA	NA	NA	NA	NA	NA	NA	NA	NA	NA	NA	NA	NA	NA	NA	NA	100	88.018
chr16:84806146-84806291/+	NA	NA	NA	NA	NA	NA	NA	NA	NA	NA	NA	NA	NA	NA	NA	NA	NA	NA	NA	NA	100	94.304	NA	NA	NA	NA	NA	NA	NA	NA
chr16:87380779-87380856/-	NA	NA	NA	NA	NA	NA	NA	NA	99.625	97.327	NA	NA	NA	NA	NA	NA	NA	NA	NA	NA	NA	NA	NA	NA	NA	NA	NA	NA	NA	NA
chr16:87762915-87762970/-	NA	NA	8.852	0.699	NA	NA	12.042	0	5.505	0	NA	NA	NA	NA	NA	NA	NA	NA	NA	NA	NA	NA	NA	NA	NA	NA	NA	NA	19.481	0
chr16:87789019-87790083/-	NA	NA	NA	NA	NA	NA	NA	NA	NA	NA	NA	NA	NA	NA	86.207	0	NA	NA	NA	NA	NA	NA	NA	NA	NA	NA	NA	NA	NA	NA
chr16:87790027-87790083/-	NA	NA	NA	NA	NA	NA	NA	NA	NA	NA	NA	NA	NA	NA	86.667	0	54.839	0	NA	NA	NA	NA	NA	NA	NA	NA	NA	NA	NA	NA
chr16:88008653-88008791/+	NA	NA	NA	NA	NA	NA	97.927	88.235	NA	NA	NA	NA	NA	NA	NA	NA	NA	NA	NA	NA	NA	NA	NA	NA	NA	NA	NA	NA	NA	NA
chr16:88037087-88037169/+	NA	NA	NA	NA	NA	NA	NA	NA	NA	NA	NA	NA	NA	NA	NA	NA	NA	NA	NA	NA	10.476	0	NA	NA	NA	NA	NA	NA	NA	NA
chr16:88037900-88038017/+	NA	NA	NA	NA	89.552	71.154	NA	NA	NA	NA	91.878	80.8	NA	NA	91.667	66.667	82.353	48.624	89.474	63.83	73.869	51.832	NA	NA	NA	NA	NA	NA	NA	NA
chr16:88653949-88654021/+	NA	NA	68.056	53.103	NA	NA	NA	NA	NA	NA	NA	NA	NA	NA	NA	NA	NA	NA	NA	NA	NA	NA	NA	NA	NA	NA	NA	NA	NA	NA
chr16:89379724-89379997/-	NA	NA	NA	NA	NA	NA	NA	NA	NA	NA	37.662	11.385	NA	NA	NA	NA	NA	NA	NA	NA	NA	NA	NA	NA	NA	NA	NA	NA	NA	NA
chr16:89485969-89486832/-	28.926	0	10.219	0	16.418	0	NA	NA	NA	NA	NA	NA	NA	NA	NA	NA	NA	NA	NA	NA	NA	NA	NA	NA	NA	NA	NA	NA	17.021	0
chr16:89488569-89488713/-	NA	NA	NA	NA	NA	NA	NA	NA	NA	NA	NA	NA	NA	NA	NA	NA	NA	NA	NA	NA	NA	NA	NA	NA	NA	NA	NA	NA	27.273	0
chr16:89493174-89493477/-	NA	NA	57.447	0	NA	NA	NA	NA	55.556	0	NA	NA	62.791	0	NA	NA	NA	NA	NA	NA	NA	NA	NA	NA	NA	NA	NA	NA	92.982	0
chr16:89493359-89493477/-	43.529	0	NA	NA	NA	NA	NA	NA	NA	NA	NA	NA	NA	NA	NA	NA	NA	NA	NA	NA	NA	NA	NA	NA	NA	NA	NA	NA	NA	NA
chr16:89612279-89612438/+	NA	NA	NA	NA	NA	NA	NA	NA	NA	NA	NA	NA	NA	NA	NA	NA	NA	NA	NA	NA	100	2.941	NA	NA	NA	NA	NA	NA	NA	NA
chr16:89809207-89809346/-	NA	NA	NA	NA	NA	NA	100	93.525	NA	NA	NA	NA	NA	NA	NA	NA	100	94.148	NA	NA	100	84.293	NA	NA	NA	NA	NA	NA	NA	NA
chr16:89818545-89818630/-	NA	NA	100	97.143	NA	NA	NA	NA	NA	NA	NA	NA	NA	NA	NA	NA	NA	NA	NA	NA	100	93.22	NA	NA	NA	NA	NA	NA	NA	NA
chr16:89824984-89825113/-	85.306	64.198	NA	NA	NA	NA	NA	NA	88.489	78.469	NA	NA	NA	NA	NA	NA	91.803	79.126	NA	NA	NA	NA	NA	NA	NA	NA	NA	NA	97.059	74.825
chr16:89954059-89954089/+	NA	NA	NA	NA	NA	NA	NA	NA	NA	NA	100	94.225	NA	NA	NA	NA	NA	NA	NA	NA	NA	NA	NA	NA	NA	NA	NA	NA	NA	NA
chr16:89960135-89960266/+	NA	NA	92.231	85.757	98.494	95.924	NA	NA	NA	NA	NA	NA	NA	NA	NA	NA	NA	NA	NA	NA	99.824	98.867	NA	NA	NA	NA	NA	NA	NA	NA
chr16:9023225-9023400/-	NA	NA	NA	NA	NA	NA	11.207	2.613	NA	NA	NA	NA	NA	NA	NA	NA	NA	NA	NA	NA	NA	NA	NA	NA	NA	NA	NA	NA	NA	NA
chr16:981641-981793/-	15.385	0	NA	NA	11.475	2.128	NA	NA	NA	NA	25.203	0	NA	NA	NA	NA	NA	NA	NA	NA	NA	NA	NA	NA	NA	NA	NA	NA	NA	NA
chr16:983674-984145/-	NA	NA	NA	NA	32.283	0	NA	NA	NA	NA	NA	NA	NA	NA	NA	NA	NA	NA	NA	NA	NA	NA	NA	NA	NA	NA	NA	NA	NA	NA
chr16:983990-984145/-	33.068	0	21.888	0	34.351	0	NA	NA	24.706	0	52.663	3.571	NA	NA	NA	NA	NA	NA	41.667	3.448	NA	NA	NA	NA	NA	NA	NA	NA	NA	NA
chr17_ctg5_hap1:705811-705913/+	99.495	87.302	NA	NA	NA	NA	NA	NA	NA	NA	NA	NA	NA	NA	NA	NA	NA	NA	NA	NA	NA	NA	NA	NA	NA	NA	NA	NA	NA	NA
chr17:1264385-1264592/-	NA	NA	NA	NA	NA	NA	NA	NA	NA	NA	NA	NA	NA	NA	NA	NA	NA	NA	NA	NA	NA	NA	NA	NA	NA	NA	NA	NA	100	95.786
chr17:1265195-1265302/-	NA	NA	NA	NA	NA	NA	NA	NA	NA	NA	NA	NA	NA	NA	NA	NA	NA	NA	NA	NA	NA	NA	NA	NA	NA	NA	NA	NA	100	96.168
chr17:15531119-15531179/-	51.825	17.647	NA	NA	NA	NA	NA	NA	NA	NA	NA	NA	NA	NA	NA	NA	NA	NA	NA	NA	NA	NA	NA	NA	NA	NA	NA	NA	NA	NA
chr17:15586167-15586265/-	NA	NA	NA	NA	100	83.051	NA	NA	NA	NA	NA	NA	NA	NA	NA	NA	NA	NA	NA	NA	NA	NA	NA	NA	NA	NA	NA	NA	NA	NA
chr17:15971207-15971435/-	NA	NA	97.763	89.189	NA	NA	NA	NA	NA	NA	NA	NA	NA	NA	NA	NA	NA	NA	NA	NA	NA	NA	NA	NA	NA	NA	NA	NA	NA	NA
chr17:15990485-15990659/-	NA	NA	50.489	36.573	NA	NA	NA	NA	NA	NA	NA	NA	27.506	18.848	NA	NA	NA	NA	NA	NA	NA	NA	NA	NA	NA	NA	NA	NA	NA	NA
chr17:16054903-16054930/-	74.194	56.627	NA	NA	NA	NA	NA	NA	NA	NA	NA	NA	NA	NA	NA	NA	NA	NA	NA	NA	NA	NA	NA	NA	NA	NA	NA	NA	NA	NA
chr17:16075116-16075309/-	NA	NA	NA	NA	NA	NA	95.498	89.041	NA	NA	NA	NA	NA	NA	NA	NA	NA	NA	NA	NA	NA	NA	NA	NA	NA	NA	NA	NA	NA	NA
chr17:16075116-16075334/-	NA	NA	NA	NA	NA	NA	100	77.465	NA	NA	NA	NA	NA	NA	NA	NA	NA	NA	NA	NA	NA	NA	NA	NA	NA	NA	NA	NA	NA	NA
chr17:16089867-16090001/-	NA	NA	NA	NA	NA	NA	97.071	91.94	NA	NA	NA	NA	NA	NA	NA	NA	NA	NA	NA	NA	NA	NA	NA	NA	NA	NA	NA	NA	NA	NA
chr17:1617664-1617747/-	NA	NA	NA	NA	NA	NA	NA	NA	NA	NA	NA	NA	NA	NA	NA	NA	NA	NA	87.831	70.968	NA	NA	NA	NA	NA	NA	NA	NA	NA	NA
chr17:17174071-17174121/-	NA	NA	100	98.77	NA	NA	NA	NA	NA	NA	NA	NA	NA	NA	NA	NA	NA	NA	NA	NA	NA	NA	NA	NA	NA	NA	NA	NA	NA	NA
chr17:175452-175545/-	36.026	0	NA	NA	NA	NA	NA	NA	NA	NA	NA	NA	NA	NA	NA	NA	NA	NA	NA	NA	NA	NA	NA	NA	NA	NA	NA	NA	NA	NA
chr17:175479-175545/-	35.922	11.494	NA	NA	NA	NA	NA	NA	NA	NA	NA	NA	NA	NA	NA	NA	NA	NA	NA	NA	NA	NA	NA	NA	NA	NA	NA	NA	NA	NA
chr17:177502-177619/-	2.124	0	NA	NA	NA	NA	NA	NA	NA	NA	NA	NA	NA	NA	NA	NA	NA	NA	NA	NA	NA	NA	NA	NA	NA	NA	NA	NA	NA	NA
chr17:1775727-1775820/+	NA	NA	100	98.414	NA	NA	NA	NA	NA	NA	NA	NA	NA	NA	NA	NA	NA	NA	NA	NA	NA	NA	NA	NA	NA	NA	NA	NA	NA	NA
chr17:17766044-17766162/-	NA	NA	NA	NA	98.566	95.963	NA	NA	NA	NA	NA	NA	NA	NA	NA	NA	NA	NA	NA	NA	NA	NA	NA	NA	NA	NA	NA	NA	NA	NA
chr17:17786018-17786177/-	NA	NA	NA	NA	NA	NA	NA	NA	NA	NA	NA	NA	NA	NA	99.494	97.122	NA	NA	NA	NA	NA	NA	NA	NA	NA	NA	NA	NA	NA	NA
chr17:17925058-17925171/-	NA	NA	NA	NA	NA	NA	NA	NA	NA	NA	100	94.231	NA	NA	NA	NA	NA	NA	NA	NA	NA	NA	NA	NA	NA	NA	NA	NA	NA	NA
chr17:18195958-18196166/-	NA	NA	NA	NA	NA	NA	NA	NA	NA	NA	NA	NA	NA	NA	NA	NA	NA	NA	100	87.013	97.778	89.916	NA	NA	NA	NA	NA	NA	NA	NA
chr17:18236479-18236602/-	NA	NA	NA	NA	NA	NA	100	83.621	NA	NA	NA	NA	NA	NA	NA	NA	NA	NA	NA	NA	NA	NA	NA	NA	NA	NA	NA	NA	NA	NA
chr17:18238872-18238989/-	NA	NA	NA	NA	NA	NA	NA	NA	NA	NA	NA	NA	NA	NA	NA	NA	77.273	60.338	NA	NA	NA	NA	NA	NA	NA	NA	NA	NA	NA	NA
chr17:18659357-18659467/+	100	72	NA	NA	NA	NA	NA	NA	NA	NA	NA	NA	NA	NA	NA	NA	NA	NA	NA	NA	NA	NA	NA	NA	NA	NA	NA	NA	NA	NA
chr17:18770569-18770647/+	NA	NA	NA	NA	NA	NA	NA	NA	NA	NA	NA	NA	NA	NA	NA	NA	NA	NA	NA	NA	NA	NA	NA	NA	NA	NA	87.5	0	NA	NA
chr17:18821602-18821700/+	NA	NA	NA	NA	NA	NA	NA	NA	NA	NA	NA	NA	3.333	0	NA	NA	NA	NA	NA	NA	NA	NA	NA	NA	NA	NA	NA	NA	NA	NA
chr17:19452947-19452990/+	NA	NA	NA	NA	NA	NA	NA	NA	97.47	92.678	NA	NA	NA	NA	NA	NA	NA	NA	NA	NA	NA	NA	NA	NA	NA	NA	NA	NA	NA	NA
chr17:19568260-19568360/+	99.726	97.96	NA	NA	NA	NA	NA	NA	NA	NA	NA	NA	NA	NA	NA	NA	NA	NA	NA	NA	NA	NA	NA	NA	NA	NA	NA	NA	NA	NA
chr17:19699407-19699595/-	NA	NA	NA	NA	NA	NA	NA	NA	NA	NA	NA	NA	NA	NA	100	92.627	NA	NA	NA	NA	NA	NA	NA	NA	NA	NA	NA	NA	NA	NA
chr17:19835117-19835291/-	100	88.93	NA	NA	NA	NA	NA	NA	NA	NA	NA	NA	NA	NA	NA	NA	NA	NA	NA	NA	100	88.372	NA	NA	NA	NA	NA	NA	NA	NA
chr17:19844199-19844323/-	NA	NA	92.632	82.645	NA	NA	NA	NA	NA	NA	NA	NA	NA	NA	NA	NA	NA	NA	NA	NA	NA	NA	NA	NA	NA	NA	NA	NA	NA	NA
chr17:20107645-20109225/+	93.117	83.396	NA	NA	NA	NA	NA	NA	NA	NA	NA	NA	NA	NA	NA	NA	NA	NA	NA	NA	NA	NA	NA	NA	NA	NA	NA	NA	NA	NA
chr17:20200273-20200390/+	NA	NA	NA	NA	NA	NA	NA	NA	NA	NA	NA	NA	NA	NA	97.403	90.476	NA	NA	NA	NA	NA	NA	NA	NA	NA	NA	NA	NA	NA	NA
chr17:20852415-20859666/+	NA	NA	NA	NA	100	0	NA	NA	NA	NA	NA	NA	NA	NA	NA	NA	NA	NA	NA	NA	NA	NA	NA	NA	NA	NA	NA	NA	NA	NA
chr17:20859506-20859666/+	NA	NA	NA	NA	97.222	77.778	NA	NA	NA	NA	NA	NA	NA	NA	NA	NA	NA	NA	NA	NA	NA	NA	NA	NA	NA	NA	NA	NA	NA	NA
chr17:2371054-2371170/-	NA	NA	NA	NA	NA	NA	NA	NA	NA	NA	NA	NA	100	86.667	NA	NA	NA	NA	NA	NA	NA	NA	NA	NA	NA	NA	NA	NA	NA	NA
chr17:25634769-25634945/+	55.631	23.688	NA	NA	90.367	74.039	NA	NA	NA	NA	86.777	76.996	NA	NA	NA	NA	NA	NA	NA	NA	NA	NA	NA	NA	NA	NA	87.5	33.158	NA	NA
chr17:25634769-25635663/+	NA	NA	NA	NA	89.915	72.94	NA	NA	NA	NA	NA	NA	NA	NA	NA	NA	NA	NA	NA	NA	NA	NA	NA	NA	NA	NA	NA	NA	NA	NA
chr17:25637086-25637200/+	NA	NA	NA	NA	100	99.187	NA	NA	NA	NA	NA	NA	NA	NA	NA	NA	NA	NA	NA	NA	NA	NA	NA	NA	NA	NA	NA	NA	NA	NA
chr17:25928385-25928427/+	NA	NA	NA	NA	NA	NA	NA	NA	NA	NA	NA	NA	NA	NA	NA	NA	NA	NA	NA	NA	45.038	29.333	NA	NA	NA	NA	NA	NA	NA	NA
chr17:26947526-26947648/-	100	98.974	NA	NA	NA	NA	NA	NA	NA	NA	NA	NA	NA	NA	NA	NA	NA	NA	NA	NA	NA	NA	NA	NA	NA	NA	NA	NA	NA	NA
chr17:26955282-26955577/-	98.749	97.43	NA	NA	99.679	97.844	99.226	96.231	99.512	96.752	NA	NA	NA	NA	NA	NA	NA	NA	NA	NA	NA	NA	NA	NA	NA	NA	NA	NA	NA	NA
chr17:26960566-26960769/-	NA	NA	NA	NA	NA	NA	NA	NA	NA	NA	NA	NA	NA	NA	100	99.158	100	98.597	NA	NA	NA	NA	NA	NA	NA	NA	NA	NA	NA	NA
chr17:26960912-26961104/-	98.725	97.277	NA	NA	NA	NA	NA	NA	NA	NA	NA	NA	NA	NA	98.825	96.911	NA	NA	NA	NA	NA	NA	NA	NA	NA	NA	NA	NA	NA	NA
chr17:26963982-26964188/-	99.393	98.789	NA	NA	NA	NA	NA	NA	NA	NA	NA	NA	NA	NA	NA	NA	NA	NA	NA	NA	NA	NA	NA	NA	NA	NA	NA	NA	NA	NA
chr17:27075279-27075441/+	NA	NA	NA	NA	NA	NA	NA	NA	97.234	92.377	NA	NA	NA	NA	NA	NA	NA	NA	NA	NA	NA	NA	NA	NA	NA	NA	NA	NA	NA	NA
chr17:27825335-27825539/+	100	97.368	NA	NA	NA	NA	NA	NA	NA	NA	NA	NA	NA	NA	NA	NA	NA	NA	NA	NA	NA	NA	NA	NA	NA	NA	NA	NA	NA	NA
chr17:27905979-27906006/-	14.004	9.039	NA	NA	NA	NA	NA	NA	NA	NA	NA	NA	NA	NA	NA	NA	NA	NA	NA	NA	NA	NA	NA	NA	NA	NA	NA	NA	NA	NA
chr17:28817143-28817235/+	100	93.503	NA	NA	NA	NA	NA	NA	NA	NA	NA	NA	NA	NA	NA	NA	NA	NA	NA	NA	NA	NA	NA	NA	NA	NA	NA	NA	NA	NA
chr17:29062050-29062115/+	NA	NA	NA	NA	95.402	75	NA	NA	NA	NA	NA	NA	NA	NA	NA	NA	NA	NA	NA	NA	NA	NA	NA	NA	NA	NA	NA	NA	NA	NA
chr17:29070318-29070387/+	NA	NA	NA	NA	NA	NA	88.186	79.331	NA	NA	NA	NA	NA	NA	NA	NA	NA	NA	NA	NA	NA	NA	NA	NA	NA	NA	NA	NA	NA	NA
chr17:29206440-29206505/+	NA	NA	NA	NA	NA	NA	97.222	89.016	NA	NA	NA	NA	NA	NA	NA	NA	NA	NA	NA	NA	NA	NA	NA	NA	NA	NA	NA	NA	NA	NA
chr17:29679274-29679432/+	100	96.958	NA	NA	NA	NA	NA	NA	NA	NA	NA	NA	NA	NA	NA	NA	NA	NA	NA	NA	NA	NA	NA	NA	NA	NA	NA	NA	NA	NA
chr17:30205720-30205800/-	NA	NA	NA	NA	100	91.795	NA	NA	NA	NA	NA	NA	NA	NA	NA	NA	NA	NA	NA	NA	NA	NA	NA	NA	NA	NA	NA	NA	NA	NA
chr17:30274635-30274704/+	NA	NA	NA	NA	NA	NA	NA	NA	NA	NA	100	75.758	NA	NA	NA	NA	NA	NA	NA	NA	NA	NA	NA	NA	NA	NA	100	80.899	NA	NA
chr17:30499955-30500079/+	NA	NA	NA	NA	NA	NA	12.558	1.828	NA	NA	NA	NA	NA	NA	NA	NA	10.345	2.899	NA	NA	5.699	0	NA	NA	NA	NA	NA	NA	NA	NA
chr17:30501375-30501457/+	NA	NA	NA	NA	NA	NA	NA	NA	NA	NA	9.709	0	NA	NA	NA	NA	NA	NA	NA	NA	NA	NA	NA	NA	NA	NA	NA	NA	NA	NA
chr17:30693683-30693776/+	NA	NA	20.596	15.716	NA	NA	NA	NA	NA	NA	NA	NA	NA	NA	NA	NA	55.021	47.193	NA	NA	57.548	41.369	NA	NA	NA	NA	NA	NA	NA	NA
chr17:30697018-30697101/+	NA	NA	NA	NA	NA	NA	75.163	52.632	NA	NA	NA	NA	NA	NA	NA	NA	NA	NA	NA	NA	NA	NA	NA	NA	NA	NA	NA	NA	NA	NA
chr17:30796016-30796211/+	100	99.636	NA	NA	NA	NA	NA	NA	NA	NA	NA	NA	NA	NA	NA	NA	NA	NA	NA	NA	NA	NA	NA	NA	NA	NA	NA	NA	NA	NA
chr17:30804538-30804601/+	100	99.405	NA	NA	NA	NA	NA	NA	NA	NA	NA	NA	NA	NA	NA	NA	NA	NA	NA	NA	NA	NA	NA	NA	NA	NA	NA	NA	NA	NA
chr17:30804538-30806394/+	100	99.401	NA	NA	NA	NA	NA	NA	NA	NA	NA	NA	NA	NA	NA	NA	NA	NA	NA	NA	NA	NA	NA	NA	NA	NA	NA	NA	NA	NA
chr17:30806268-30806394/+	100	99.434	NA	NA	NA	NA	NA	NA	NA	NA	NA	NA	NA	NA	NA	NA	NA	NA	NA	NA	NA	NA	NA	NA	NA	NA	NA	NA	NA	NA
chr17:31260191-31260323/+	NA	NA	NA	NA	NA	NA	NA	NA	NA	NA	NA	NA	NA	NA	NA	NA	NA	NA	100	98.307	NA	NA	NA	NA	NA	NA	NA	NA	NA	NA
chr17:33348389-33348800/-	NA	NA	NA	NA	NA	NA	NA	NA	NA	NA	NA	NA	93.464	88.808	NA	NA	NA	NA	NA	NA	NA	NA	NA	NA	NA	NA	NA	NA	NA	NA
chr17:34034932-34035028/+	NA	NA	NA	NA	NA	NA	3.767	1.421	NA	NA	NA	NA	NA	NA	NA	NA	NA	NA	NA	NA	NA	NA	NA	NA	NA	NA	NA	NA	NA	NA
chr17:34856303-34856799/-	100	0	NA	NA	NA	NA	NA	NA	NA	NA	NA	NA	NA	NA	NA	NA	NA	NA	NA	NA	NA	NA	NA	NA	NA	NA	NA	NA	NA	NA
chr17:34856669-34856799/-	100	93.814	NA	NA	NA	NA	NA	NA	NA	NA	NA	NA	NA	NA	NA	NA	NA	NA	NA	NA	NA	NA	NA	NA	NA	NA	NA	NA	NA	NA
chr17:34866584-34866756/-	NA	NA	NA	NA	NA	NA	NA	NA	NA	NA	NA	NA	NA	NA	NA	NA	NA	NA	NA	NA	100	96.618	NA	NA	NA	NA	NA	NA	NA	NA
chr17:3524372-3524706/-	NA	NA	50.702	0	NA	NA	NA	NA	NA	NA	NA	NA	NA	NA	NA	NA	NA	NA	NA	NA	NA	NA	NA	NA	NA	NA	NA	NA	NA	NA
chr17:3524530-3524706/-	NA	NA	70.217	52.294	NA	NA	NA	NA	NA	NA	NA	NA	NA	NA	NA	NA	NA	NA	NA	NA	NA	NA	NA	NA	NA	NA	NA	NA	NA	NA
chr17:35536200-35536347/-	NA	NA	100	96.774	NA	NA	100	97.623	NA	NA	NA	NA	NA	NA	NA	NA	NA	NA	NA	NA	NA	NA	NA	NA	NA	NA	NA	NA	NA	NA
chr17:35557248-35557277/-	NA	NA	NA	NA	NA	NA	4.681	0	NA	NA	NA	NA	NA	NA	NA	NA	NA	NA	NA	NA	NA	NA	NA	NA	NA	NA	NA	NA	NA	NA
chr17:35567380-35567404/-	NA	NA	NA	NA	NA	NA	83.367	79.161	NA	NA	NA	NA	NA	NA	NA	NA	NA	NA	NA	NA	NA	NA	NA	NA	NA	NA	NA	NA	NA	NA
chr17:35581912-35582026/-	NA	NA	100	98.729	NA	NA	NA	NA	NA	NA	NA	NA	NA	NA	NA	NA	NA	NA	NA	NA	NA	NA	NA	NA	NA	NA	NA	NA	NA	NA
chr17:35646319-35646430/-	NA	NA	NA	NA	NA	NA	25.049	11.554	NA	NA	NA	NA	NA	NA	NA	NA	NA	NA	NA	NA	NA	NA	NA	NA	NA	NA	NA	NA	NA	NA
chr17:35797838-35797930/+	NA	NA	100	98.195	NA	NA	NA	NA	NA	NA	NA	NA	NA	NA	NA	NA	NA	NA	NA	NA	NA	NA	NA	NA	NA	NA	NA	NA	NA	NA
chr17:35797838-35798023/+	NA	NA	100	96.454	NA	NA	NA	NA	NA	NA	NA	NA	NA	NA	NA	NA	NA	NA	NA	NA	NA	NA	NA	NA	NA	NA	NA	NA	NA	NA
chr17:35797838-35798059/+	NA	NA	100	96.479	NA	NA	NA	NA	NA	NA	NA	NA	NA	NA	NA	NA	NA	NA	NA	NA	NA	NA	NA	NA	NA	NA	NA	NA	NA	NA
chr17:35802664-35802753/+	NA	NA	100	88.584	NA	NA	97.222	91.304	NA	NA	NA	NA	NA	NA	NA	NA	NA	NA	NA	NA	NA	NA	NA	NA	NA	NA	NA	NA	NA	NA
chr17:35802670-35802753/+	NA	NA	100	76.744	NA	NA	91.667	0	NA	NA	NA	NA	NA	NA	NA	NA	NA	NA	NA	NA	NA	NA	NA	NA	NA	NA	NA	NA	NA	NA
chr17:35930735-35930984/-	NA	NA	NA	NA	NA	NA	NA	NA	NA	NA	NA	NA	100	95	NA	NA	NA	NA	NA	NA	NA	NA	NA	NA	NA	NA	NA	NA	NA	NA
chr17:35937477-35937711/-	NA	NA	NA	NA	NA	NA	NA	NA	NA	NA	NA	NA	96.552	82.946	NA	NA	NA	NA	NA	NA	NA	NA	NA	NA	NA	NA	NA	NA	NA	NA
chr17:35937544-35937711/-	NA	NA	NA	NA	NA	NA	NA	NA	NA	NA	NA	NA	93.103	0	NA	NA	NA	NA	NA	NA	NA	NA	NA	NA	NA	NA	NA	NA	NA	NA
chr17:35939227-35939530/-	NA	NA	93.377	76.19	51.261	37.5	NA	NA	NA	NA	NA	NA	NA	NA	NA	NA	NA	NA	97.778	72.603	NA	NA	NA	NA	NA	NA	NA	NA	NA	NA
chr17:36520634-36520739/+	NA	NA	NA	NA	NA	NA	100	63.636	NA	NA	NA	NA	NA	NA	NA	NA	NA	NA	NA	NA	NA	NA	NA	NA	NA	NA	NA	NA	NA	NA
chr17:36864015-36864125/+	NA	NA	NA	NA	100	97.647	NA	NA	NA	NA	NA	NA	NA	NA	NA	NA	NA	NA	NA	NA	NA	NA	NA	NA	NA	NA	NA	NA	NA	NA
chr17:37575969-37576171/-	NA	NA	100	96.303	NA	NA	NA	NA	NA	NA	NA	NA	NA	NA	NA	NA	100	94.565	NA	NA	NA	NA	NA	NA	NA	NA	NA	NA	NA	NA
chr17:37587367-37587441/-	NA	NA	NA	NA	NA	NA	99.627	97.398	NA	NA	NA	NA	100	96.825	NA	NA	NA	NA	NA	NA	NA	NA	NA	NA	NA	NA	NA	NA	NA	NA
chr17:37596638-37596771/-	98.09	95.122	NA	NA	NA	NA	NA	NA	NA	NA	100	95.385	NA	NA	NA	NA	NA	NA	NA	NA	NA	NA	NA	NA	NA	NA	NA	NA	NA	NA
chr17:37866338-37866454/+	NA	NA	NA	NA	NA	NA	NA	NA	NA	NA	NA	NA	NA	NA	100	97.108	NA	NA	NA	NA	NA	NA	NA	NA	NA	NA	NA	NA	NA	NA
chr17:37866592-37866734/+	NA	NA	NA	NA	NA	NA	NA	NA	NA	NA	NA	NA	NA	NA	NA	NA	NA	NA	100	95.349	NA	NA	NA	NA	NA	NA	NA	NA	NA	NA
chr17:38191168-38191225/-	26.29	10.288	NA	NA	NA	NA	NA	NA	NA	NA	23.418	12.676	NA	NA	NA	NA	NA	NA	NA	NA	NA	NA	NA	NA	NA	NA	NA	NA	NA	NA
chr17:38548319-38548363/-	NA	NA	NA	NA	NA	NA	100	98.866	NA	NA	NA	NA	NA	NA	NA	NA	NA	NA	NA	NA	NA	NA	NA	NA	NA	NA	NA	NA	NA	NA
chr17:3959552-3959639/-	NA	NA	NA	NA	NA	NA	NA	NA	NA	NA	NA	NA	NA	NA	53.333	0	NA	NA	NA	NA	NA	NA	NA	NA	NA	NA	NA	NA	NA	NA
chr17:3974632-3974740/-	22.255	6.612	NA	NA	NA	NA	NA	NA	NA	NA	29.747	12	NA	NA	NA	NA	NA	NA	NA	NA	NA	NA	NA	NA	NA	NA	NA	NA	NA	NA
chr17:39985041-39985204/-	NA	NA	NA	NA	NA	NA	NA	NA	NA	NA	NA	NA	NA	NA	NA	NA	100	97.492	NA	NA	NA	NA	NA	NA	NA	NA	NA	NA	NA	NA
chr17:40052872-40052902/-	77.868	72.887	NA	NA	70.666	64.395	NA	NA	NA	NA	69.651	59.105	NA	NA	NA	NA	65.992	54.031	NA	NA	NA	NA	NA	NA	NA	NA	NA	NA	NA	NA
chr17:40054001-40054092/-	99.915	98.873	NA	NA	NA	NA	NA	NA	NA	NA	NA	NA	NA	NA	NA	NA	100	99.167	NA	NA	NA	NA	NA	NA	NA	NA	NA	NA	NA	NA
chr17:40060981-40061043/-	NA	NA	NA	NA	NA	NA	NA	NA	NA	NA	NA	NA	NA	NA	NA	NA	100	99.523	NA	NA	NA	NA	NA	NA	NA	NA	NA	NA	NA	NA
chr17:40061774-40061842/-	NA	NA	NA	NA	99.634	98.273	NA	NA	NA	NA	NA	NA	NA	NA	NA	NA	NA	NA	NA	NA	NA	NA	NA	NA	NA	NA	NA	NA	NA	NA
chr17:40061774-40061911/-	NA	NA	NA	NA	99.817	99.102	NA	NA	NA	NA	NA	NA	NA	NA	NA	NA	NA	NA	NA	NA	NA	NA	NA	NA	NA	NA	NA	NA	NA	NA
chr17:40066474-40066537/-	NA	NA	NA	NA	NA	NA	100	99.523	NA	NA	NA	NA	NA	NA	NA	NA	NA	NA	NA	NA	NA	NA	NA	NA	NA	NA	NA	NA	NA	NA
chr17:40379546-40379703/-	NA	NA	NA	NA	NA	NA	NA	NA	NA	NA	NA	NA	NA	NA	NA	NA	99.306	94.536	NA	NA	NA	NA	NA	NA	NA	NA	NA	NA	NA	NA
chr17:40865226-40865407/-	98.117	91.765	NA	NA	NA	NA	NA	NA	NA	NA	NA	NA	NA	NA	NA	NA	NA	NA	NA	NA	NA	NA	NA	NA	NA	NA	NA	NA	NA	NA
chr17:40869993-40870085/-	90.814	77.293	NA	NA	NA	NA	NA	NA	NA	NA	NA	NA	NA	NA	NA	NA	NA	NA	NA	NA	NA	NA	NA	NA	NA	NA	NA	NA	NA	NA
chr17:40876322-40876442/-	97.26	81.013	NA	NA	NA	NA	NA	NA	NA	NA	97.143	86.154	NA	NA	NA	NA	NA	NA	NA	NA	NA	NA	NA	NA	NA	NA	NA	NA	NA	NA
chr17:40990109-40990222/+	NA	NA	NA	NA	100	97.619	NA	NA	NA	NA	NA	NA	NA	NA	NA	NA	NA	NA	NA	NA	NA	NA	NA	NA	NA	NA	NA	NA	NA	NA
chr17:41201137-41201211/-	NA	NA	NA	NA	NA	NA	100	97.586	NA	NA	NA	NA	NA	NA	NA	NA	NA	NA	NA	NA	NA	NA	NA	NA	NA	NA	NA	NA	NA	NA
chr17:41203079-41203134/-	100	95.935	NA	NA	NA	NA	NA	NA	NA	NA	NA	NA	NA	NA	NA	NA	NA	NA	NA	NA	NA	NA	NA	NA	NA	NA	NA	NA	NA	NA
chr17:41247862-41247939/-	NA	NA	NA	NA	NA	NA	84.647	78.414	NA	NA	NA	NA	NA	NA	NA	NA	NA	NA	NA	NA	NA	NA	NA	NA	NA	NA	NA	NA	NA	NA
chr17:41249260-41249306/-	NA	NA	NA	NA	NA	NA	83.158	76.112	NA	NA	NA	NA	NA	NA	NA	NA	NA	NA	NA	NA	NA	NA	NA	NA	NA	NA	NA	NA	NA	NA
chr17:41348497-41348608/+	NA	NA	NA	NA	NA	NA	NA	NA	NA	NA	100	99.161	NA	NA	NA	NA	NA	NA	NA	NA	NA	NA	NA	NA	NA	NA	NA	NA	NA	NA
chr17:41348958-41349123/+	NA	NA	NA	NA	NA	NA	NA	NA	NA	NA	100	97.636	NA	NA	NA	NA	NA	NA	NA	NA	100	94	NA	NA	NA	NA	NA	NA	NA	NA
chr17:41598118-41598247/+	97.545	94.792	NA	NA	NA	NA	NA	NA	NA	NA	NA	NA	NA	NA	NA	NA	NA	NA	NA	NA	NA	NA	NA	NA	NA	NA	NA	NA	NA	NA
chr17:4200011-4200109/-	NA	NA	NA	NA	NA	NA	99.2	92.068	NA	NA	NA	NA	NA	NA	NA	NA	NA	NA	NA	NA	NA	NA	NA	NA	NA	NA	NA	NA	NA	NA
chr17:42232220-42232306/+	NA	NA	NA	NA	NA	NA	NA	NA	NA	NA	NA	NA	NA	NA	100	88.372	NA	NA	NA	NA	NA	NA	NA	NA	NA	NA	NA	NA	NA	NA
chr17:42516038-42516083/-	NA	NA	NA	NA	NA	NA	NA	NA	NA	NA	NA	NA	NA	NA	NA	NA	NA	NA	NA	NA	NA	NA	NA	NA	NA	NA	NA	NA	48.718	12.698
chr17:42544464-42544482/-	NA	NA	NA	NA	NA	NA	NA	NA	NA	NA	NA	NA	NA	NA	NA	NA	NA	NA	NA	NA	NA	NA	NA	NA	NA	NA	NA	NA	100	17.073
chr17:42551092-42551127/-	NA	NA	NA	NA	NA	NA	NA	NA	NA	NA	NA	NA	NA	NA	NA	NA	NA	NA	NA	NA	NA	NA	NA	NA	NA	NA	NA	NA	85.714	6.173
chr17:42809545-42809633/+	55.689	32.45	75.758	33.333	NA	NA	NA	NA	NA	NA	NA	NA	NA	NA	NA	NA	NA	NA	NA	NA	NA	NA	NA	NA	NA	NA	NA	NA	NA	NA
chr17:42811457-42811531/+	100	92.814	NA	NA	NA	NA	NA	NA	NA	NA	NA	NA	NA	NA	NA	NA	NA	NA	NA	NA	NA	NA	NA	NA	NA	NA	NA	NA	NA	NA
chr17:42945174-42945265/-	NA	NA	100	98.557	NA	NA	NA	NA	NA	NA	NA	NA	NA	NA	NA	NA	NA	NA	NA	NA	NA	NA	NA	NA	NA	NA	NA	NA	NA	NA
chr17:42945654-42945718/-	NA	NA	100	99.03	NA	NA	NA	NA	NA	NA	NA	NA	NA	NA	NA	NA	NA	NA	NA	NA	NA	NA	NA	NA	NA	NA	NA	NA	NA	NA
chr17:45734225-45734426/+	NA	NA	NA	NA	NA	NA	100	99.533	NA	NA	NA	NA	NA	NA	NA	NA	NA	NA	NA	NA	NA	NA	NA	NA	NA	NA	NA	NA	NA	NA
chr17:45753774-45753857/+	NA	NA	NA	NA	NA	NA	100	99.52	NA	NA	NA	NA	NA	NA	NA	NA	NA	NA	NA	NA	NA	NA	NA	NA	NA	NA	NA	NA	NA	NA
chr17:4586324-4586374/-	NA	NA	NA	NA	NA	NA	NA	NA	6.007	0	NA	NA	NA	NA	NA	NA	NA	NA	NA	NA	NA	NA	NA	NA	NA	NA	NA	NA	NA	NA
chr17:46109525-46109599/-	NA	NA	NA	NA	86.751	0	NA	NA	NA	NA	NA	NA	NA	NA	NA	NA	NA	NA	NA	NA	NA	NA	NA	NA	NA	NA	NA	NA	NA	NA
chr17:46110051-46110668/-	NA	NA	NA	NA	NA	NA	NA	NA	NA	NA	95.624	92.098	NA	NA	NA	NA	NA	NA	NA	NA	NA	NA	NA	NA	NA	NA	NA	NA	NA	NA
chr17:46110576-46110668/-	NA	NA	NA	NA	NA	NA	NA	NA	NA	NA	94.674	89.866	NA	NA	NA	NA	NA	NA	92.605	85.329	NA	NA	NA	NA	NA	NA	NA	NA	NA	NA
chr17:46990195-46990327/+	100	95.421	NA	NA	NA	NA	NA	NA	97.714	95.516	100	96.626	NA	NA	NA	NA	NA	NA	100	95.992	NA	NA	NA	NA	NA	NA	NA	NA	NA	NA
chr17:46990195-46990383/+	NA	NA	NA	NA	97.41	94.787	NA	NA	NA	NA	NA	NA	NA	NA	NA	NA	NA	NA	NA	NA	NA	NA	NA	NA	NA	NA	NA	NA	NA	NA
chr17:47491603-47491695/-	NA	NA	NA	NA	NA	NA	NA	NA	NA	NA	NA	NA	NA	NA	NA	NA	4.153	0.583	NA	NA	NA	NA	NA	NA	NA	NA	NA	NA	NA	NA
chr17:48154337-48154485/+	NA	NA	NA	NA	NA	NA	NA	NA	NA	NA	NA	NA	NA	NA	99.728	98.656	NA	NA	NA	NA	NA	NA	NA	NA	NA	NA	NA	NA	NA	NA
chr17:48154349-48154485/+	NA	NA	NA	NA	NA	NA	NA	NA	NA	NA	NA	NA	NA	NA	99.34	0	NA	NA	NA	NA	NA	NA	NA	NA	NA	NA	NA	NA	NA	NA
chr17:48455955-48456042/+	NA	NA	100	88.525	NA	NA	NA	NA	NA	NA	NA	NA	NA	NA	NA	NA	NA	NA	NA	NA	NA	NA	NA	NA	NA	NA	NA	NA	NA	NA
chr17:48734430-48734544/+	94.228	0	NA	NA	NA	NA	NA	NA	NA	NA	NA	NA	NA	NA	NA	NA	NA	NA	NA	NA	NA	NA	NA	NA	NA	NA	NA	NA	NA	NA
chr17:48734445-48734544/+	94.297	0	NA	NA	NA	NA	NA	NA	NA	NA	NA	NA	NA	NA	NA	NA	NA	NA	NA	NA	NA	NA	NA	NA	NA	NA	NA	NA	NA	NA
chr17:48734700-48735045/+	0.9	0.388	NA	NA	NA	NA	NA	NA	NA	NA	NA	NA	NA	NA	NA	NA	NA	NA	NA	NA	NA	NA	NA	NA	NA	NA	NA	NA	NA	NA
chr17:48741041-48741472/+	99.943	99.079	NA	NA	NA	NA	NA	NA	NA	NA	NA	NA	NA	NA	NA	NA	NA	NA	NA	NA	NA	NA	NA	NA	NA	NA	NA	NA	NA	NA
chr17:48741310-48741472/+	99.962	99.517	NA	NA	NA	NA	NA	NA	NA	NA	NA	NA	NA	NA	NA	NA	NA	NA	NA	NA	NA	NA	NA	NA	NA	NA	NA	NA	NA	NA
chr17:48741310-48742606/+	99.791	99.384	NA	NA	NA	NA	NA	NA	NA	NA	NA	NA	NA	NA	NA	NA	NA	NA	NA	NA	NA	NA	NA	NA	NA	NA	NA	NA	NA	NA
chr17:48750331-48750499/+	99.045	97.376	NA	NA	NA	NA	NA	NA	NA	NA	NA	NA	NA	NA	NA	NA	NA	NA	NA	NA	NA	NA	NA	NA	NA	NA	NA	NA	NA	NA
chr17:48750331-48751019/+	100	99.284	NA	NA	NA	NA	NA	NA	NA	NA	NA	NA	NA	NA	NA	NA	NA	NA	NA	NA	NA	NA	NA	NA	NA	NA	NA	NA	NA	NA
chr17:48750829-48751019/+	100	99.282	NA	NA	NA	NA	NA	NA	NA	NA	NA	NA	NA	NA	NA	NA	NA	NA	NA	NA	NA	NA	NA	NA	NA	NA	NA	NA	NA	NA
chr17:48814647-48814840/+	NA	NA	100	5.029	NA	NA	NA	NA	NA	NA	NA	NA	NA	NA	NA	NA	NA	NA	NA	NA	NA	NA	NA	NA	NA	NA	NA	NA	NA	NA
chr17:49053223-49053262/-	57.265	39.651	NA	NA	85.321	74.534	NA	NA	NA	NA	NA	NA	NA	NA	NA	NA	NA	NA	NA	NA	NA	NA	NA	NA	NA	NA	NA	NA	NA	NA
chr17:49109041-49109083/-	NA	NA	33.333	22.673	NA	NA	NA	NA	NA	NA	NA	NA	NA	NA	NA	NA	NA	NA	NA	NA	NA	NA	NA	NA	NA	NA	NA	NA	NA	NA
chr17:503184-503334/-	NA	NA	NA	NA	6.628	0	NA	NA	NA	NA	NA	NA	NA	NA	NA	NA	NA	NA	NA	NA	NA	NA	NA	NA	NA	NA	NA	NA	NA	NA
chr17:5238478-5238639/+	NA	NA	NA	NA	NA	NA	99.209	95.261	NA	NA	NA	NA	NA	NA	NA	NA	NA	NA	NA	NA	NA	NA	NA	NA	NA	NA	NA	NA	NA	NA
chr17:53019649-53019852/+	3.283	0	NA	NA	NA	NA	NA	NA	NA	NA	NA	NA	NA	NA	5.369	0.304	NA	NA	NA	NA	NA	NA	NA	NA	NA	NA	NA	NA	NA	NA
chr17:53024621-53024673/+	100	96.737	NA	NA	NA	NA	NA	NA	NA	NA	NA	NA	NA	NA	NA	NA	NA	NA	NA	NA	NA	NA	NA	NA	NA	NA	NA	NA	NA	NA
chr17:53026878-53026984/+	99.471	96.692	NA	NA	NA	NA	NA	NA	NA	NA	NA	NA	NA	NA	NA	NA	NA	NA	NA	NA	NA	NA	NA	NA	NA	NA	NA	NA	NA	NA
chr17:53026911-53026984/+	99.142	94.672	NA	NA	NA	NA	NA	NA	NA	NA	NA	NA	NA	NA	NA	NA	NA	NA	NA	NA	NA	NA	NA	NA	NA	NA	NA	NA	NA	NA
chr17:53027405-53027487/+	99.31	93.187	NA	NA	NA	NA	NA	NA	NA	NA	NA	NA	NA	NA	NA	NA	NA	NA	NA	NA	NA	NA	NA	NA	NA	NA	NA	NA	NA	NA
chr17:5329555-5329619/+	95.331	86.193	NA	NA	NA	NA	100	93.493	NA	NA	NA	NA	NA	NA	NA	NA	NA	NA	NA	NA	NA	NA	NA	NA	NA	NA	NA	NA	NA	NA
chr17:53479526-53479664/-	NA	NA	17.685	1.176	NA	NA	NA	NA	NA	NA	NA	NA	27.059	0	NA	NA	NA	NA	NA	NA	NA	NA	NA	NA	NA	NA	NA	NA	NA	NA
chr17:53479574-53479664/-	32.331	5.14	23.582	4.545	21.285	1.828	NA	NA	21.29	3.32	NA	NA	NA	NA	NA	NA	NA	NA	NA	NA	NA	NA	NA	NA	NA	NA	NA	NA	100	3.673
chr17:535983-536081/-	12.787	0	NA	NA	NA	NA	NA	NA	44.444	0	NA	NA	NA	NA	10.044	4.07	NA	NA	NA	NA	NA	NA	NA	NA	NA	NA	NA	NA	NA	NA
chr17:55387488-55387687/+	NA	NA	NA	NA	2.595	0	NA	NA	NA	NA	NA	NA	NA	NA	NA	NA	NA	NA	NA	NA	NA	NA	NA	NA	NA	NA	NA	NA	NA	NA
chr17:55448309-55448352/+	NA	NA	NA	NA	NA	NA	5.442	0	NA	NA	NA	NA	NA	NA	NA	NA	NA	NA	NA	NA	NA	NA	NA	NA	NA	NA	NA	NA	NA	NA
chr17:55944717-55944776/-	98.726	88.841	NA	NA	NA	NA	NA	NA	NA	NA	NA	NA	NA	NA	NA	NA	NA	NA	NA	NA	NA	NA	NA	NA	NA	NA	NA	NA	NA	NA
chr17:55945510-55946554/-	100	97.613	NA	NA	NA	NA	NA	NA	NA	NA	NA	NA	NA	NA	NA	NA	NA	NA	NA	NA	NA	NA	NA	NA	NA	NA	NA	NA	NA	NA
chr17:55946482-55946554/-	99.413	96.575	NA	NA	NA	NA	NA	NA	NA	NA	NA	NA	NA	NA	NA	NA	NA	NA	NA	NA	NA	NA	NA	NA	NA	NA	NA	NA	NA	NA
chr17:56783238-56783383/+	NA	NA	NA	NA	NA	NA	19.355	5.077	NA	NA	NA	NA	NA	NA	NA	NA	NA	NA	NA	NA	NA	NA	NA	NA	NA	NA	NA	NA	NA	NA
chr17:57078958-57079075/-	NA	NA	NA	NA	NA	NA	NA	NA	NA	NA	NA	NA	NA	NA	NA	NA	NA	NA	100	86.517	NA	NA	NA	NA	NA	NA	NA	NA	NA	NA
chr17:57078958-57079116/-	79.73	68.379	NA	NA	NA	NA	NA	NA	NA	NA	NA	NA	NA	NA	NA	NA	NA	NA	NA	NA	NA	NA	NA	NA	NA	NA	NA	NA	NA	NA
chr17:57094734-57094785/-	84.507	0	NA	NA	NA	NA	NA	NA	NA	NA	NA	NA	NA	NA	NA	NA	NA	NA	NA	NA	NA	NA	NA	NA	NA	NA	NA	NA	NA	NA
chr17:57167377-57167453/-	7.853	3.604	13.547	3.137	13.793	7.104	NA	NA	NA	NA	NA	NA	14.917	4.11	NA	NA	NA	NA	NA	NA	10.334	3.145	NA	NA	NA	NA	NA	NA	NA	NA
chr17:57812698-57812834/+	NA	NA	NA	NA	NA	NA	NA	NA	NA	NA	NA	NA	NA	NA	NA	NA	NA	NA	NA	NA	100	95.724	NA	NA	NA	NA	NA	NA	NA	NA
chr17:57814813-57814904/+	98	96.279	99.227	96.095	99.448	97.024	NA	NA	NA	NA	NA	NA	98.922	95.562	100	98.614	NA	NA	NA	NA	NA	NA	NA	NA	NA	NA	NA	NA	NA	NA
chr17:57816197-57816308/+	100	98.637	100	99.392	99.722	98.643	NA	NA	NA	NA	NA	NA	NA	NA	NA	NA	NA	NA	NA	NA	NA	NA	NA	NA	NA	NA	NA	NA	NA	NA
chr17:57842331-57842499/+	NA	NA	NA	NA	NA	NA	100	97.128	NA	NA	NA	NA	100	97.289	100	97.141	NA	NA	NA	NA	NA	NA	NA	NA	NA	NA	NA	NA	NA	NA
chr17:57842412-57842499/+	NA	NA	NA	NA	NA	NA	100	93.137	NA	NA	NA	NA	NA	NA	NA	NA	NA	NA	NA	NA	NA	NA	NA	NA	NA	NA	NA	NA	NA	NA
chr17:57886156-57886237/+	NA	NA	100	98.451	NA	NA	NA	NA	NA	NA	NA	NA	NA	NA	NA	NA	NA	NA	NA	NA	NA	NA	NA	NA	NA	NA	NA	NA	NA	NA
chr17:57968191-57968289/-	100	71.171	NA	NA	NA	NA	NA	NA	NA	NA	NA	NA	NA	NA	NA	NA	NA	NA	NA	NA	NA	NA	NA	NA	NA	NA	NA	NA	NA	NA
chr17:58008160-58008413/+	9.417	2.571	NA	NA	NA	NA	NA	NA	NA	NA	NA	NA	NA	NA	NA	NA	NA	NA	NA	NA	NA	NA	NA	NA	NA	NA	NA	NA	NA	NA
chr17:58365883-58366043/-	NA	NA	NA	NA	94.255	87.778	NA	NA	NA	NA	NA	NA	NA	NA	NA	NA	NA	NA	NA	NA	NA	NA	NA	NA	NA	NA	NA	NA	NA	NA
chr17:58573773-58573802/-	NA	NA	NA	NA	NA	NA	NA	NA	NA	NA	NA	NA	NA	NA	NA	NA	NA	NA	NA	NA	NA	NA	NA	NA	37.5	8.696	NA	NA	50	8.696
chr17:58766292-58766407/+	NA	NA	NA	NA	NA	NA	NA	NA	NA	NA	NA	NA	NA	NA	NA	NA	NA	NA	NA	NA	NA	NA	NA	NA	NA	NA	NA	NA	55.556	4.762
chr17:59081160-59081250/+	NA	NA	NA	NA	NA	NA	NA	NA	NA	NA	NA	NA	NA	NA	NA	NA	5.051	0	NA	NA	NA	NA	NA	NA	NA	NA	NA	NA	NA	NA
chr17:59855480-59855540/-	NA	NA	NA	NA	NA	NA	NA	NA	NA	NA	NA	NA	NA	NA	NA	NA	NA	NA	NA	NA	NA	NA	NA	NA	NA	NA	NA	NA	27.835	0
chr17:60106901-60107012/-	100	98.239	NA	NA	NA	NA	NA	NA	NA	NA	NA	NA	NA	NA	NA	NA	NA	NA	NA	NA	NA	NA	NA	NA	NA	NA	NA	NA	NA	NA
chr17:60112823-60112969/-	99.79	97.595	NA	NA	NA	NA	NA	NA	NA	NA	NA	NA	NA	NA	NA	NA	NA	NA	NA	NA	NA	NA	NA	NA	NA	NA	NA	NA	NA	NA
chr17:60629662-60629758/+	NA	NA	NA	NA	NA	NA	NA	NA	NA	NA	NA	NA	NA	NA	99.251	95.477	NA	NA	NA	NA	NA	NA	NA	NA	NA	NA	NA	NA	NA	NA
chr17:60759197-60759298/+	NA	NA	NA	NA	NA	NA	NA	NA	NA	NA	100	99.331	NA	NA	NA	NA	NA	NA	NA	NA	NA	NA	NA	NA	NA	NA	NA	NA	NA	NA
chr17:60766882-60767121/+	NA	NA	NA	NA	NA	NA	NA	NA	NA	NA	100	97.49	NA	NA	NA	NA	NA	NA	NA	NA	NA	NA	NA	NA	NA	NA	NA	NA	NA	NA
chr17:60766971-60767121/+	NA	NA	NA	NA	NA	NA	NA	NA	NA	NA	100	0	NA	NA	NA	NA	NA	NA	NA	NA	NA	NA	NA	NA	NA	NA	NA	NA	NA	NA
chr17:64509453-64509499/+	NA	NA	NA	NA	NA	NA	41.27	1.005	NA	NA	NA	NA	47.335	8.434	29.487	0	NA	NA	NA	NA	24.302	0	NA	NA	NA	NA	100	0	NA	NA
chr17:64782984-64783092/+	100	98.328	NA	NA	NA	NA	NA	NA	NA	NA	NA	NA	NA	NA	NA	NA	NA	NA	NA	NA	NA	NA	NA	NA	NA	NA	NA	NA	NA	NA
chr17:65925074-65925236/+	NA	NA	19.905	3.396	32.127	19.196	NA	NA	45.283	14.219	NA	NA	NA	NA	NA	NA	NA	NA	NA	NA	30.887	12.381	NA	NA	NA	NA	NA	NA	71.429	16.957
chr17:65959448-65959622/+	NA	NA	77.778	55.191	74.154	63.771	NA	NA	NA	NA	NA	NA	NA	NA	67.606	50.777	NA	NA	72.691	57.258	67.711	45.223	NA	NA	NA	NA	NA	NA	NA	NA
chr17:67109362-67109488/-	NA	NA	NA	NA	NA	NA	NA	NA	NA	NA	NA	NA	94.286	74.129	NA	NA	NA	NA	NA	NA	NA	NA	NA	NA	NA	NA	NA	NA	NA	NA
chr17:67109362-67109501/-	NA	NA	NA	NA	NA	NA	NA	NA	NA	NA	NA	NA	96.296	85.475	NA	NA	NA	NA	NA	NA	NA	NA	NA	NA	NA	NA	NA	NA	NA	NA
chr17:71201691-71201819/+	NA	NA	100	88.235	NA	NA	NA	NA	NA	NA	NA	NA	NA	NA	NA	NA	NA	NA	NA	NA	NA	NA	NA	NA	NA	NA	NA	NA	NA	NA
chr17:7149344-7149456/-	NA	NA	99.473	98.501	NA	NA	NA	NA	NA	NA	NA	NA	NA	NA	NA	NA	NA	NA	NA	NA	NA	NA	NA	NA	NA	NA	NA	NA	NA	NA
chr17:73211848-73211918/+	100	97.795	100	98.662	100	95.142	NA	NA	NA	NA	NA	NA	NA	NA	NA	NA	NA	NA	NA	NA	NA	NA	NA	NA	NA	NA	NA	NA	NA	NA
chr17:73214279-73214401/+	NA	NA	NA	NA	NA	NA	NA	NA	98.225	94.13	NA	NA	NA	NA	NA	NA	NA	NA	NA	NA	NA	NA	NA	NA	NA	NA	NA	NA	NA	NA
chr17:73661130-73661171/-	NA	NA	NA	NA	NA	NA	NA	NA	100	87.586	NA	NA	NA	NA	NA	NA	NA	NA	NA	NA	NA	NA	NA	NA	NA	NA	NA	NA	NA	NA
chr17:73687473-73687611/+	NA	NA	NA	NA	NA	NA	NA	NA	NA	NA	100	5.31	NA	NA	NA	NA	NA	NA	NA	NA	NA	NA	NA	NA	NA	NA	NA	NA	NA	NA
chr17:74309279-74309315/-	NA	NA	NA	NA	NA	NA	NA	NA	NA	NA	NA	NA	NA	NA	NA	NA	NA	NA	NA	NA	3.992	1.068	NA	NA	NA	NA	NA	NA	NA	NA
chr17:74554455-74554682/+	NA	NA	NA	NA	NA	NA	3.592	1.772	NA	NA	NA	NA	NA	NA	NA	NA	NA	NA	NA	NA	NA	NA	NA	NA	NA	NA	NA	NA	NA	NA
chr17:7476717-7476865/+	1.59	0.628	NA	NA	NA	NA	NA	NA	NA	NA	1.645	0.551	NA	NA	NA	NA	NA	NA	NA	NA	NA	NA	NA	NA	NA	NA	NA	NA	NA	NA
chr17:76392388-76392466/+	NA	NA	NA	NA	NA	NA	NA	NA	NA	NA	89.474	74.481	NA	NA	NA	NA	NA	NA	NA	NA	NA	NA	NA	NA	NA	NA	NA	NA	NA	NA
chr17:76396757-76396936/+	NA	NA	NA	NA	NA	NA	NA	NA	NA	NA	NA	NA	NA	NA	100	96.711	NA	NA	NA	NA	NA	NA	NA	NA	NA	NA	NA	NA	NA	NA
chr17:76824978-76825089/-	NA	NA	NA	NA	NA	NA	NA	NA	100	97.595	NA	NA	NA	NA	NA	NA	NA	NA	NA	NA	NA	NA	NA	NA	NA	NA	NA	NA	NA	NA
chr17:78201621-78201759/+	NA	NA	NA	NA	76.471	0	NA	NA	NA	NA	NA	NA	NA	NA	NA	NA	NA	NA	NA	NA	NA	NA	NA	NA	NA	NA	NA	NA	NA	NA
chr17:78252562-78252709/+	61.379	30.435	NA	NA	NA	NA	NA	NA	NA	NA	NA	NA	NA	NA	NA	NA	NA	NA	NA	NA	42.254	23.077	NA	NA	NA	NA	NA	NA	NA	NA
chr17:78857218-78857284/+	98.958	87.654	NA	NA	NA	NA	NA	NA	NA	NA	NA	NA	NA	NA	NA	NA	NA	NA	NA	NA	NA	NA	NA	NA	NA	NA	NA	NA	NA	NA
chr17:78858807-78858948/+	98.113	86.111	NA	NA	NA	NA	NA	NA	NA	NA	NA	NA	NA	NA	NA	NA	NA	NA	NA	NA	NA	NA	NA	NA	NA	NA	NA	NA	NA	NA
chr17:79030202-79030277/+	17.588	0	26.027	2.564	17.293	0	33.333	0	NA	NA	18.75	0	NA	NA	NA	NA	NA	NA	NA	NA	NA	NA	NA	NA	NA	NA	NA	NA	NA	NA
chr17:79246315-79246427/-	NA	NA	NA	NA	96.356	93.906	NA	NA	NA	NA	NA	NA	NA	NA	NA	NA	NA	NA	NA	NA	NA	NA	NA	NA	NA	NA	NA	NA	NA	NA
chr17:79254408-79254533/-	NA	NA	NA	NA	NA	NA	NA	NA	100	96.667	NA	NA	NA	NA	NA	NA	NA	NA	NA	NA	NA	NA	NA	NA	NA	NA	NA	NA	NA	NA
chr17:79575753-79575848/-	NA	NA	NA	NA	NA	NA	NA	NA	NA	NA	NA	NA	100	96.847	NA	NA	NA	NA	NA	NA	NA	NA	NA	NA	NA	NA	NA	NA	NA	NA
chr17:79575753-79577284/-	98.446	96.79	NA	NA	NA	NA	NA	NA	NA	NA	NA	NA	NA	NA	NA	NA	NA	NA	NA	NA	NA	NA	NA	NA	NA	NA	NA	NA	NA	NA
chr17:79892404-79892621/-	NA	NA	80.357	0	NA	NA	NA	NA	NA	NA	NA	NA	NA	NA	NA	NA	NA	NA	NA	NA	NA	NA	NA	NA	NA	NA	NA	NA	NA	NA
chr17:79952696-79952754/+	NA	NA	100	83.158	NA	NA	NA	NA	NA	NA	NA	NA	NA	NA	NA	NA	NA	NA	NA	NA	NA	NA	NA	NA	NA	NA	NA	NA	NA	NA
chr17:79952696-79953941/+	NA	NA	100	88.991	NA	NA	NA	NA	NA	NA	NA	NA	NA	NA	NA	NA	NA	NA	NA	NA	NA	NA	NA	NA	NA	NA	NA	NA	NA	NA
chr17:79954295-79954722/+	NA	NA	98.206	81.132	NA	NA	NA	NA	NA	NA	NA	NA	NA	NA	NA	NA	NA	NA	NA	NA	NA	NA	NA	NA	NA	NA	NA	NA	NA	NA
chr17:80010131-80010335/+	NA	NA	NA	NA	NA	NA	NA	NA	7.821	3.345	NA	NA	NA	NA	NA	NA	NA	NA	NA	NA	NA	NA	NA	NA	NA	NA	NA	NA	NA	NA
chr17:80525929-80526077/+	NA	NA	NA	NA	NA	NA	97.183	92.467	NA	NA	NA	NA	100	95.556	100	97.211	100	96.66	NA	NA	NA	NA	NA	NA	NA	NA	NA	NA	100	88.517
chr17:80540616-80540810/+	NA	NA	NA	NA	NA	NA	100	95.767	NA	NA	NA	NA	NA	NA	NA	NA	NA	NA	NA	NA	NA	NA	NA	NA	NA	NA	NA	NA	NA	NA
chr17:80541888-80542064/+	NA	NA	NA	NA	100	96.667	NA	NA	NA	NA	NA	NA	NA	NA	NA	NA	NA	NA	NA	NA	NA	NA	NA	NA	NA	NA	NA	NA	NA	NA
chr17:80725980-80726092/+	5.78	0.383	NA	NA	NA	NA	4.989	0	3.926	0	NA	NA	NA	NA	NA	NA	NA	NA	NA	NA	NA	NA	NA	NA	NA	NA	NA	NA	NA	NA
chr17:80725980-80726096/+	3.094	0.383	NA	NA	NA	NA	NA	NA	NA	NA	NA	NA	NA	NA	NA	NA	NA	NA	NA	NA	NA	NA	NA	NA	NA	NA	NA	NA	NA	NA
chr17:80834656-80834857/+	NA	NA	NA	NA	NA	NA	NA	NA	NA	NA	NA	NA	3.125	0	NA	NA	NA	NA	NA	NA	NA	NA	NA	NA	NA	NA	NA	NA	NA	NA
chr17:80847543-80847573/+	NA	NA	NA	NA	NA	NA	NA	NA	100	97.567	NA	NA	NA	NA	NA	NA	NA	NA	NA	NA	NA	NA	NA	NA	NA	NA	NA	NA	NA	NA
chr17:80851422-80851508/+	NA	NA	NA	NA	NA	NA	NA	NA	100	97.831	NA	NA	NA	NA	NA	NA	NA	NA	NA	NA	NA	NA	NA	NA	NA	NA	NA	NA	NA	NA
chr17:80858471-80858607/+	93.182	0	NA	NA	NA	NA	NA	NA	NA	NA	NA	NA	92.329	0	NA	NA	NA	NA	NA	NA	NA	NA	NA	NA	NA	NA	NA	NA	NA	NA
chr17:80858526-80858607/+	97.264	91.76	NA	NA	NA	NA	NA	NA	NA	NA	96.854	91.878	NA	NA	97.397	94.034	NA	NA	NA	NA	NA	NA	NA	NA	NA	NA	NA	NA	NA	NA
chr17:80863811-80863929/+	NA	NA	NA	NA	NA	NA	NA	NA	100	96.04	NA	NA	NA	NA	NA	NA	NA	NA	NA	NA	NA	NA	NA	NA	NA	NA	NA	NA	NA	NA
chr17:80866172-80866313/+	NA	NA	NA	NA	NA	NA	2.54	0	NA	NA	NA	NA	2.114	0	NA	NA	NA	NA	NA	NA	NA	NA	NA	NA	NA	NA	NA	NA	NA	NA
chr17:80867160-80867183/+	NA	NA	NA	NA	99.024	95.964	NA	NA	100	85.328	NA	NA	NA	NA	NA	NA	NA	NA	NA	NA	NA	NA	NA	NA	NA	NA	NA	NA	NA	NA
chr17:8110057-8110206/-	NA	NA	NA	NA	NA	NA	NA	NA	NA	NA	NA	NA	NA	NA	NA	NA	NA	NA	NA	NA	100	85.075	NA	NA	NA	NA	NA	NA	NA	NA
chr17:8110067-8110206/-	NA	NA	NA	NA	NA	NA	NA	NA	NA	NA	NA	NA	NA	NA	NA	NA	NA	NA	NA	NA	100	92.647	NA	NA	NA	NA	NA	NA	NA	NA
chr17:8110067-8110252/-	NA	NA	NA	NA	NA	NA	NA	NA	NA	NA	NA	NA	NA	NA	NA	NA	NA	NA	NA	NA	100	90.148	NA	NA	NA	NA	NA	NA	NA	NA
chr17:8479960-8479990/-	NA	NA	NA	NA	NA	NA	NA	NA	NA	NA	NA	NA	NA	NA	NA	NA	NA	NA	7.216	1.943	NA	NA	NA	NA	NA	NA	NA	NA	100	18.75
chr17:9763258-9763418/+	NA	NA	99.055	97.19	NA	NA	NA	NA	NA	NA	NA	NA	NA	NA	NA	NA	NA	NA	NA	NA	NA	NA	NA	NA	NA	NA	NA	NA	NA	NA
chr18:12452483-12452511/-	NA	NA	98.795	92	NA	NA	NA	NA	NA	NA	NA	NA	NA	NA	NA	NA	NA	NA	NA	NA	NA	NA	NA	NA	NA	NA	NA	NA	NA	NA
chr18:1273361-1273534/-	NA	NA	NA	NA	NA	NA	36.538	16.53	NA	NA	NA	NA	NA	NA	NA	NA	NA	NA	NA	NA	NA	NA	NA	NA	NA	NA	NA	NA	NA	NA
chr18:12819212-12819281/-	NA	NA	NA	NA	NA	NA	4.673	0	NA	NA	NA	NA	NA	NA	NA	NA	NA	NA	NA	NA	NA	NA	NA	NA	NA	NA	NA	NA	NA	NA
chr18:12825808-12825943/-	NA	NA	NA	NA	NA	NA	100	97.004	NA	NA	NA	NA	NA	NA	NA	NA	NA	NA	NA	NA	NA	NA	NA	NA	NA	NA	NA	NA	NA	NA
chr18:13029661-13030001/+	NA	NA	NA	NA	NA	NA	NA	NA	NA	NA	NA	NA	NA	NA	NA	NA	NA	NA	100	88.235	NA	NA	NA	NA	NA	NA	NA	NA	NA	NA
chr18:13030463-13030607/+	NA	NA	NA	NA	NA	NA	NA	NA	NA	NA	NA	NA	NA	NA	NA	NA	NA	NA	100	90.385	NA	NA	NA	NA	NA	NA	NA	NA	NA	NA
chr18:13038368-13038578/+	96.61	83.505	NA	NA	NA	NA	NA	NA	NA	NA	NA	NA	NA	NA	NA	NA	NA	NA	NA	NA	NA	NA	NA	NA	NA	NA	NA	NA	NA	NA
chr18:13038513-13038578/+	NA	NA	NA	NA	NA	NA	NA	NA	NA	NA	NA	NA	NA	NA	100	0	NA	NA	NA	NA	NA	NA	NA	NA	NA	NA	NA	NA	NA	NA
chr18:13042202-13042333/+	NA	NA	NA	NA	NA	NA	85.847	80	NA	NA	NA	NA	NA	NA	NA	NA	NA	NA	NA	NA	NA	NA	NA	NA	NA	NA	NA	NA	NA	NA
chr18:13042202-13042349/+	NA	NA	NA	NA	NA	NA	71.226	59.016	NA	NA	NA	NA	NA	NA	NA	NA	NA	NA	NA	NA	NA	NA	NA	NA	NA	NA	NA	NA	NA	NA
chr18:13071037-13071211/+	NA	NA	NA	NA	NA	NA	NA	NA	NA	NA	NA	NA	NA	NA	NA	NA	100	79.167	NA	NA	NA	NA	NA	NA	NA	NA	NA	NA	NA	NA
chr18:13103873-13103966/+	NA	NA	20	10.526	NA	NA	NA	NA	NA	NA	NA	NA	NA	NA	NA	NA	NA	NA	NA	NA	NA	NA	NA	NA	NA	NA	NA	NA	NA	NA
chr18:13114128-13114250/+	NA	NA	NA	NA	NA	NA	NA	NA	NA	NA	NA	NA	NA	NA	NA	NA	NA	NA	NA	NA	100	90	NA	NA	NA	NA	NA	NA	NA	NA
chr18:178932-179037/+	NA	NA	NA	NA	NA	NA	NA	NA	NA	NA	NA	NA	NA	NA	NA	NA	NA	NA	NA	NA	NA	NA	NA	NA	100	89.097	NA	NA	NA	NA
chr18:19120537-19120661/-	NA	NA	NA	NA	NA	NA	NA	NA	NA	NA	NA	NA	NA	NA	NA	NA	NA	NA	NA	NA	NA	NA	NA	NA	NA	NA	NA	NA	100	3.846
chr18:19346020-19346112/+	NA	NA	NA	NA	NA	NA	NA	NA	NA	NA	NA	NA	NA	NA	NA	NA	NA	NA	NA	NA	NA	NA	NA	NA	NA	NA	NA	NA	1.98	0
chr18:19379801-19379935/+	NA	NA	96.992	85.143	NA	NA	NA	NA	NA	NA	NA	NA	NA	NA	NA	NA	NA	NA	NA	NA	NA	NA	NA	NA	NA	NA	NA	NA	NA	NA
chr18:20948678-20948714/-	NA	NA	NA	NA	100	78.049	NA	NA	NA	NA	NA	NA	NA	NA	NA	NA	NA	NA	NA	NA	NA	NA	NA	NA	NA	NA	NA	NA	NA	NA
chr18:21358549-21358843/+	9.851	3.145	23.502	4	NA	NA	NA	NA	NA	NA	NA	NA	NA	NA	NA	NA	NA	NA	NA	NA	NA	NA	NA	NA	NA	NA	NA	NA	NA	NA
chr18:21417961-21417996/+	4.202	0.488	NA	NA	NA	NA	NA	NA	NA	NA	NA	NA	NA	NA	NA	NA	NA	NA	NA	NA	NA	NA	NA	NA	NA	NA	NA	NA	NA	NA
chr18:21487820-21487899/+	NA	NA	NA	NA	NA	NA	NA	NA	NA	NA	NA	NA	NA	NA	97.786	0	NA	NA	NA	NA	NA	NA	NA	NA	NA	NA	NA	NA	NA	NA
chr18:21512123-21512255/+	NA	NA	NA	NA	NA	NA	NA	NA	NA	NA	NA	NA	NA	NA	100	99.887	NA	NA	NA	NA	NA	NA	NA	NA	NA	NA	NA	NA	NA	NA
chr18:21602504-21602811/+	NA	NA	NA	NA	NA	NA	NA	NA	NA	NA	20.773	1.292	NA	NA	NA	NA	NA	NA	NA	NA	NA	NA	NA	NA	NA	NA	NA	NA	NA	NA
chr18:21649120-21649235/+	NA	NA	98.182	88.489	NA	NA	NA	NA	NA	NA	NA	NA	NA	NA	NA	NA	NA	NA	NA	NA	NA	NA	NA	NA	NA	NA	NA	NA	NA	NA
chr18:21757976-21758159/-	NA	NA	NA	NA	NA	NA	NA	NA	NA	NA	NA	NA	NA	NA	98.315	92.246	NA	NA	NA	NA	NA	NA	NA	NA	NA	NA	NA	NA	NA	NA
chr18:21758125-21758159/-	NA	NA	NA	NA	NA	NA	NA	NA	NA	NA	NA	NA	NA	NA	97.98	88.686	NA	NA	NA	NA	NA	NA	NA	NA	NA	NA	NA	NA	NA	NA
chr18:21948509-21948553/-	NA	NA	NA	NA	NA	NA	NA	NA	NA	NA	NA	NA	NA	NA	NA	NA	14.444	3.205	NA	NA	NA	NA	NA	NA	NA	NA	NA	NA	NA	NA
chr18:22907369-22907412/-	NA	NA	NA	NA	NA	NA	NA	NA	NA	NA	NA	NA	NA	NA	NA	NA	NA	NA	NA	NA	2.388	0	NA	NA	NA	NA	NA	NA	NA	NA
chr18:23618518-23618623/-	NA	NA	NA	NA	NA	NA	NA	NA	NA	NA	NA	NA	NA	NA	NA	NA	99.885	98.716	NA	NA	NA	NA	NA	NA	NA	NA	NA	NA	NA	NA
chr18:23648457-23648521/-	NA	NA	NA	NA	NA	NA	NA	NA	NA	NA	NA	NA	NA	NA	NA	NA	2.236	0.369	NA	NA	100	2.077	NA	NA	NA	NA	NA	NA	NA	NA
chr18:23660268-23660387/-	NA	NA	NA	NA	NA	NA	NA	NA	NA	NA	100	1.205	NA	NA	NA	NA	NA	NA	NA	NA	NA	NA	NA	NA	NA	NA	NA	NA	NA	NA
chr18:23662326-23662492/-	NA	NA	100	2.722	NA	NA	NA	NA	NA	NA	100	2.036	NA	NA	NA	NA	NA	NA	NA	NA	100	3.802	NA	NA	NA	NA	NA	NA	NA	NA
chr18:2700732-2700916/+	NA	NA	NA	NA	NA	NA	98.758	95.556	NA	NA	NA	NA	NA	NA	NA	NA	NA	NA	NA	NA	NA	NA	NA	NA	NA	NA	NA	NA	NA	NA
chr18:29493366-29493485/-	NA	NA	NA	NA	NA	NA	86.813	0	NA	NA	NA	NA	NA	NA	NA	NA	NA	NA	NA	NA	NA	NA	NA	NA	NA	NA	NA	NA	NA	NA
chr18:29497540-29497630/-	NA	NA	NA	NA	NA	NA	98.847	96.954	NA	NA	NA	NA	NA	NA	NA	NA	NA	NA	NA	NA	NA	NA	NA	NA	NA	NA	NA	NA	NA	NA
chr18:29693707-29693823/+	NA	NA	NA	NA	NA	NA	98.007	94.467	NA	NA	NA	NA	NA	NA	NA	NA	96.503	86.301	NA	NA	NA	NA	NA	NA	100	93.333	100	89.136	100	93.333
chr18:29703480-29703537/+	NA	NA	NA	NA	NA	NA	NA	NA	100	94.152	NA	NA	NA	NA	NA	NA	NA	NA	NA	NA	NA	NA	NA	NA	NA	NA	NA	NA	NA	NA
chr18:29703486-29703537/+	NA	NA	NA	NA	NA	NA	NA	NA	NA	NA	NA	NA	NA	NA	NA	NA	91.429	0	NA	NA	NA	NA	NA	NA	NA	NA	NA	NA	NA	NA
chr18:29704696-29704808/+	NA	NA	NA	NA	NA	NA	100	98.695	NA	NA	NA	NA	NA	NA	NA	NA	NA	NA	NA	NA	NA	NA	NA	NA	NA	NA	NA	NA	NA	NA
chr18:33059263-33059375/-	NA	NA	NA	NA	NA	NA	NA	NA	100	93.399	NA	NA	NA	NA	NA	NA	NA	NA	NA	NA	NA	NA	NA	NA	NA	NA	NA	NA	NA	NA
chr18:33739920-33739978/+	NA	NA	99.29	96.769	NA	NA	100	97.384	NA	NA	NA	NA	NA	NA	NA	NA	NA	NA	NA	NA	NA	NA	NA	NA	NA	NA	NA	NA	NA	NA
chr18:33779645-33780287/+	NA	NA	NA	NA	NA	NA	NA	NA	NA	NA	98.348	94.757	NA	NA	NA	NA	NA	NA	NA	NA	NA	NA	NA	NA	NA	NA	NA	NA	NA	NA
chr18:33780157-33780269/+	NA	NA	NA	NA	NA	NA	NA	NA	60.804	0	NA	NA	NA	NA	NA	NA	NA	NA	NA	NA	NA	NA	NA	NA	NA	NA	NA	NA	NA	NA
chr18:33780157-33780287/+	NA	NA	NA	NA	NA	NA	NA	NA	91.917	0	NA	NA	NA	NA	NA	NA	NA	NA	NA	NA	NA	NA	NA	NA	NA	NA	NA	NA	NA	NA
chr18:33793328-33793445/+	NA	NA	NA	NA	NA	NA	NA	NA	NA	NA	100	96	NA	NA	NA	NA	NA	NA	NA	NA	NA	NA	NA	NA	NA	NA	NA	NA	NA	NA
chr18:34380160-34380274/-	NA	NA	NA	NA	NA	NA	NA	NA	NA	NA	NA	NA	NA	NA	NA	NA	100	99.501	NA	NA	NA	NA	NA	NA	NA	NA	NA	NA	NA	NA
chr18:34385320-34385465/-	NA	NA	NA	NA	NA	NA	NA	NA	NA	NA	NA	NA	NA	NA	NA	NA	88.738	0	NA	NA	NA	NA	NA	NA	NA	NA	NA	NA	NA	NA
chr18:34385336-34385360/-	NA	NA	NA	NA	NA	NA	NA	NA	NA	NA	NA	NA	NA	NA	NA	NA	NA	NA	NA	NA	100	96.278	NA	NA	NA	NA	NA	NA	NA	NA
chr18:43702432-43702556/+	NA	NA	NA	NA	NA	NA	NA	NA	NA	NA	NA	NA	NA	NA	NA	NA	NA	NA	NA	NA	100	90.84	NA	NA	NA	NA	NA	NA	NA	NA
chr18:44398240-44398410/-	NA	NA	8.228	0	NA	NA	NA	NA	NA	NA	NA	NA	22.034	9.032	NA	NA	NA	NA	NA	NA	NA	NA	NA	NA	NA	NA	NA	NA	NA	NA
chr18:45394422-45394468/-	NA	NA	0.478	0	NA	NA	NA	NA	NA	NA	NA	NA	NA	NA	NA	NA	NA	NA	NA	NA	NA	NA	NA	NA	NA	NA	NA	NA	NA	NA
chr18:45396845-45396935/-	NA	NA	94.734	92.782	NA	NA	NA	NA	NA	NA	NA	NA	NA	NA	NA	NA	NA	NA	NA	NA	NA	NA	NA	NA	NA	NA	NA	NA	100	94.66
chr18:45415391-45415462/-	2.308	0.327	NA	NA	NA	NA	NA	NA	NA	NA	NA	NA	NA	NA	NA	NA	NA	NA	NA	NA	NA	NA	NA	NA	NA	NA	NA	NA	NA	NA
chr18:46858233-46858376/-	NA	NA	NA	NA	NA	NA	NA	NA	NA	NA	100	98.507	NA	NA	NA	NA	NA	NA	NA	NA	NA	NA	NA	NA	NA	NA	NA	NA	NA	NA
chr18:46860097-46860223/-	100	97.009	NA	NA	NA	NA	NA	NA	NA	NA	NA	NA	NA	NA	NA	NA	NA	NA	NA	NA	NA	NA	NA	NA	NA	NA	NA	NA	NA	NA
chr18:48465939-48466010/+	100	97.531	NA	NA	NA	NA	NA	NA	NA	NA	NA	NA	NA	NA	NA	NA	NA	NA	NA	NA	NA	NA	NA	NA	NA	NA	NA	NA	NA	NA
chr18:51807036-51807273/+	100	93.069	NA	NA	NA	NA	NA	NA	NA	NA	NA	NA	NA	NA	NA	NA	NA	NA	NA	NA	NA	NA	NA	NA	NA	NA	NA	NA	NA	NA
chr18:51810112-51810185/+	NA	NA	NA	NA	29.412	5.983	NA	NA	NA	NA	NA	NA	NA	NA	NA	NA	NA	NA	NA	NA	NA	NA	NA	NA	NA	NA	NA	NA	NA	NA
[truncated: 2,211 more rows]

## Sheet: retained intron
Chrom:Start-End/Strand	A549_circular_pir	A549_linear_pir	HeLa_S3_circular_pir	HeLa_S3_linear_pir	SK-N-SH_RA_circular_pir	SK-N-SH_RA_linear_pir	K562_circular_pir	K562_linear_pir	HepG2_circular_pir	HepG2_linear_pir	BJ_circular_pir	BJ_linear_pir	GM12878_circular_pir	GM12878_linear_pir	NHEK_circular_pir	NHEK_linear_pir	H1_circular_pir	H1_linear_pir	AG04450_circular_pir	AG04450_linear_pir	HUVEC_circular_pir	HUVEC_linear_pir	H9_p(A)−_circular_pir	H9_p(A)−_linear_pir	PA1_p(A)−_circular_pir	PA1_p(A)−_linear_pir	H9_p(A)−_RNaseR_circular_pir	H9_p(A)−_RNaseR_linear_pir	PA1_p(A)−_RNaseR_circular_pir	PA1_p(A)−_RNaseR_linear_pir
chr1:100176505-100177660/-	NA	NA	NA	NA	NA	NA	3.333	2.857	NA	NA	NA	NA	NA	NA	NA	NA	NA	NA	NA	NA	NA	NA	NA	NA	NA	NA	NA	NA	NA	NA
chr1:100181228-100182965/-	NA	NA	NA	NA	NA	NA	4.731	1.095	NA	NA	NA	NA	NA	NA	NA	NA	NA	NA	NA	NA	NA	NA	NA	NA	NA	NA	NA	NA	NA	NA
chr1:100183081-100185089/-	NA	NA	NA	NA	NA	NA	3.26	1.19	NA	NA	NA	NA	NA	NA	NA	NA	NA	NA	NA	NA	NA	NA	NA	NA	NA	NA	NA	NA	NA	NA
chr1:100212986-100214128/-	NA	NA	NA	NA	NA	NA	2.904	0.647	NA	NA	NA	NA	NA	NA	NA	NA	NA	NA	NA	NA	NA	NA	NA	NA	NA	NA	NA	NA	NA	NA
chr1:101362227-101372407/+	NA	NA	NA	NA	NA	NA	NA	NA	NA	NA	NA	NA	NA	NA	5.882	1.333	NA	NA	NA	NA	NA	NA	NA	NA	NA	NA	NA	NA	NA	NA
chr1:101377794-101379218/+	6.289	2.439	NA	NA	NA	NA	NA	NA	NA	NA	4.439	1.852	NA	NA	NA	NA	NA	NA	NA	NA	NA	NA	NA	NA	NA	NA	NA	NA	NA	NA
chr1:10327616-10328209/+	NA	NA	NA	NA	NA	NA	NA	NA	NA	NA	NA	NA	NA	NA	NA	NA	NA	NA	NA	NA	NA	NA	NA	NA	8.451	0.242	NA	NA	NA	NA
chr1:103481298-103483375/-	NA	NA	NA	NA	NA	NA	NA	NA	NA	NA	NA	NA	NA	NA	NA	NA	NA	NA	NA	NA	NA	NA	NA	NA	25	0	NA	NA	NA	NA
chr1:103487325-103488297/-	NA	NA	NA	NA	NA	NA	NA	NA	NA	NA	NA	NA	NA	NA	NA	NA	NA	NA	NA	NA	NA	NA	NA	NA	32.836	0.38	NA	NA	NA	NA
chr1:10425303-10425466/+	NA	NA	NA	NA	5	0	NA	NA	NA	NA	NA	NA	NA	NA	NA	NA	NA	NA	NA	NA	NA	NA	NA	NA	NA	NA	NA	NA	NA	NA
chr1:10463193-10464217/+	NA	NA	NA	NA	NA	NA	3.093	0.57	NA	NA	NA	NA	NA	NA	NA	NA	NA	NA	NA	NA	NA	NA	NA	NA	NA	NA	NA	NA	NA	NA
chr1:10471609-10473118/+	NA	NA	NA	NA	NA	NA	1.767	1.085	NA	NA	NA	NA	NA	NA	NA	NA	NA	NA	NA	NA	NA	NA	NA	NA	NA	NA	NA	NA	NA	NA
chr1:109482764-109484026/-	NA	NA	NA	NA	NA	NA	4.215	1.856	NA	NA	NA	NA	NA	NA	NA	NA	NA	NA	NA	NA	NA	NA	NA	NA	NA	NA	NA	NA	NA	NA
chr1:109484120-109486096/-	NA	NA	NA	NA	NA	NA	6.481	3.373	NA	NA	NA	NA	NA	NA	NA	NA	NA	NA	NA	NA	NA	NA	NA	NA	NA	NA	NA	NA	NA	NA
chr1:109486237-109486457/-	NA	NA	NA	NA	NA	NA	4.587	0.184	NA	NA	NA	NA	NA	NA	NA	NA	NA	NA	NA	NA	NA	NA	NA	NA	NA	NA	NA	NA	NA	NA
chr1:109952636-109953632/-	NA	NA	NA	NA	NA	NA	3.846	0.338	NA	NA	NA	NA	NA	NA	NA	NA	NA	NA	NA	NA	NA	NA	NA	NA	NA	NA	NA	NA	NA	NA
chr1:109954557-109954698/-	NA	NA	NA	NA	NA	NA	0.726	0	NA	NA	NA	NA	NA	NA	NA	NA	NA	NA	NA	NA	NA	NA	NA	NA	NA	NA	NA	NA	NA	NA
chr1:109954806-109955689/-	NA	NA	NA	NA	NA	NA	1.169	0.17	NA	NA	NA	NA	NA	NA	NA	NA	NA	NA	NA	NA	NA	NA	NA	NA	NA	NA	NA	NA	NA	NA
chr1:110560205-110560567/+	2.578	0.171	NA	NA	NA	NA	NA	NA	NA	NA	NA	NA	NA	NA	NA	NA	NA	NA	NA	NA	NA	NA	NA	NA	NA	NA	NA	NA	NA	NA
chr1:110560638-110560994/+	0.943	0.257	NA	NA	NA	NA	NA	NA	NA	NA	NA	NA	NA	NA	NA	NA	NA	NA	NA	NA	NA	NA	NA	NA	NA	NA	NA	NA	NA	NA
chr1:11131030-11132143/-	NA	NA	NA	NA	NA	NA	NA	NA	NA	NA	NA	NA	53.846	5.97	NA	NA	NA	NA	NA	NA	NA	NA	NA	NA	NA	NA	NA	NA	NA	NA
chr1:11137500-11137657/-	NA	NA	NA	NA	NA	NA	18.919	12.821	NA	NA	NA	NA	NA	NA	NA	NA	NA	NA	NA	NA	NA	NA	NA	NA	NA	NA	NA	NA	NA	NA
chr1:111434093-111434966/+	NA	NA	NA	NA	NA	NA	6.026	2.415	NA	NA	NA	NA	5.643	0.96	NA	NA	NA	NA	NA	NA	NA	NA	NA	NA	NA	NA	NA	NA	NA	NA
chr1:11190834-11193136/-	8.617	6.931	10.478	7.104	NA	NA	NA	NA	NA	NA	NA	NA	NA	NA	NA	NA	NA	NA	NA	NA	NA	NA	NA	NA	NA	NA	NA	NA	NA	NA
chr1:111989766-111990056/-	NA	NA	NA	NA	NA	NA	5.394	1.275	NA	NA	NA	NA	NA	NA	NA	NA	NA	NA	NA	NA	NA	NA	NA	NA	NA	NA	NA	NA	NA	NA
chr1:11204812-11205024/-	NA	NA	3.085	0	NA	NA	5.584	2.422	NA	NA	NA	NA	NA	NA	NA	NA	NA	NA	NA	NA	NA	NA	NA	NA	NA	NA	NA	NA	NA	NA
chr1:11272531-11272852/-	NA	NA	NA	NA	NA	NA	NA	NA	2.326	0.552	NA	NA	NA	NA	NA	NA	NA	NA	NA	NA	NA	NA	NA	NA	NA	NA	NA	NA	NA	NA
chr1:11307790-11307875/-	NA	NA	NA	NA	2.651	0	NA	NA	NA	NA	NA	NA	NA	NA	NA	NA	NA	NA	NA	NA	NA	NA	NA	NA	NA	NA	NA	NA	NA	NA
chr1:114499908-114500687/+	NA	NA	1.038	0.662	NA	NA	NA	NA	NA	NA	NA	NA	NA	NA	NA	NA	NA	NA	NA	NA	NA	NA	NA	NA	NA	NA	NA	NA	NA	NA
chr1:114505060-114506008/+	NA	NA	NA	NA	NA	NA	NA	NA	NA	NA	NA	NA	NA	NA	NA	NA	NA	NA	NA	NA	NA	NA	NA	NA	18.519	4.762	NA	NA	NA	NA
chr1:114968345-114969798/-	NA	NA	NA	NA	NA	NA	NA	NA	NA	NA	NA	NA	NA	NA	NA	NA	NA	NA	NA	NA	NA	NA	NA	NA	34.783	3.478	NA	NA	NA	NA
chr1:115273269-115275224/-	NA	NA	NA	NA	NA	NA	0.965	0.207	NA	NA	NA	NA	NA	NA	NA	NA	NA	NA	NA	NA	NA	NA	NA	NA	NA	NA	NA	NA	NA	NA
chr1:115276478-115276609/-	NA	NA	NA	NA	NA	NA	0.902	0.128	NA	NA	NA	NA	NA	NA	NA	NA	NA	NA	NA	NA	NA	NA	NA	NA	NA	NA	NA	NA	NA	NA
chr1:115279476-115280091/-	NA	NA	NA	NA	NA	NA	2.504	1.031	NA	NA	NA	NA	NA	NA	NA	NA	NA	NA	NA	NA	NA	NA	NA	NA	NA	NA	NA	NA	NA	NA
chr1:115280184-115280583/-	NA	NA	NA	NA	NA	NA	5.765	0.201	NA	NA	NA	NA	NA	NA	NA	NA	NA	NA	NA	NA	NA	NA	NA	NA	NA	NA	NA	NA	NA	NA
chr1:116931394-116931523/+	NA	NA	NA	NA	NA	NA	NA	NA	NA	NA	NA	NA	2.377	0.08	NA	NA	NA	NA	NA	NA	NA	NA	NA	NA	NA	NA	NA	NA	NA	NA
chr1:116931641-116932060/+	NA	NA	NA	NA	NA	NA	NA	NA	NA	NA	NA	NA	3.891	0.4	NA	NA	NA	NA	NA	NA	NA	NA	NA	NA	NA	NA	NA	NA	NA	NA
chr1:116939356-116940509/+	NA	NA	NA	NA	NA	NA	NA	NA	0.309	0.036	NA	NA	NA	NA	NA	NA	NA	NA	NA	NA	NA	NA	NA	NA	NA	NA	NA	NA	NA	NA
chr1:11861456-11862937/-	NA	NA	NA	NA	NA	NA	16.732	4.268	NA	NA	NA	NA	NA	NA	NA	NA	NA	NA	NA	NA	NA	NA	NA	NA	NA	NA	NA	NA	NA	NA
chr1:11875968-11876671/+	NA	NA	27.778	0	NA	NA	NA	NA	NA	NA	NA	NA	NA	NA	NA	NA	NA	NA	NA	NA	NA	NA	NA	NA	NA	NA	NA	NA	NA	NA
chr1:12018000-12018572/+	NA	NA	0.408	0	NA	NA	NA	NA	1.77	0.087	NA	NA	NA	NA	NA	NA	NA	NA	NA	NA	NA	NA	NA	NA	NA	NA	NA	NA	NA	NA
chr1:12049400-12052611/+	NA	NA	1.979	0	NA	NA	1.487	0.31	NA	NA	NA	NA	NA	NA	NA	NA	2.113	0.441	NA	NA	NA	NA	NA	NA	NA	NA	NA	NA	NA	NA
chr1:12062160-12064048/+	NA	NA	14.121	0.3	NA	NA	NA	NA	NA	NA	NA	NA	NA	NA	NA	NA	NA	NA	NA	NA	NA	NA	NA	NA	NA	NA	NA	NA	NA	NA
chr1:12313883-12316389/+	NA	NA	NA	NA	NA	NA	2.773	0.599	NA	NA	NA	NA	NA	NA	NA	NA	NA	NA	NA	NA	NA	NA	NA	NA	NA	NA	NA	NA	NA	NA
chr1:12395884-12398287/+	NA	NA	NA	NA	NA	NA	46.067	11.111	NA	NA	NA	NA	NA	NA	NA	NA	NA	NA	NA	NA	NA	NA	NA	NA	NA	NA	NA	NA	NA	NA
chr1:12401942-12402955/+	NA	NA	NA	NA	NA	NA	11.521	7.843	NA	NA	NA	NA	NA	NA	NA	NA	NA	NA	NA	NA	NA	NA	NA	NA	NA	NA	NA	NA	NA	NA
chr1:12409030-12409220/+	NA	NA	NA	NA	NA	NA	NA	NA	NA	NA	11.324	1.282	NA	NA	NA	NA	NA	NA	NA	NA	NA	NA	NA	NA	NA	NA	NA	NA	NA	NA
chr1:12460387-12461660/+	NA	NA	NA	NA	NA	NA	4.615	2.381	NA	NA	NA	NA	NA	NA	NA	NA	NA	NA	NA	NA	NA	NA	NA	NA	NA	NA	NA	NA	NA	NA
chr1:1247748-1247819/-	NA	NA	11.635	2.825	NA	NA	NA	NA	NA	NA	NA	NA	NA	NA	NA	NA	NA	NA	NA	NA	NA	NA	NA	NA	NA	NA	NA	NA	NA	NA
chr1:1248504-1248888/-	NA	NA	NA	NA	NA	NA	NA	NA	9.249	3.057	NA	NA	NA	NA	NA	NA	NA	NA	NA	NA	NA	NA	NA	NA	NA	NA	NA	NA	NA	NA
chr1:12638984-12639320/-	NA	NA	0.766	0	NA	NA	NA	NA	NA	NA	NA	NA	NA	NA	NA	NA	NA	NA	NA	NA	NA	NA	NA	NA	NA	NA	NA	NA	NA	NA
chr1:1273816-1273901/-	NA	NA	NA	NA	NA	NA	NA	NA	NA	NA	NA	NA	NA	NA	NA	NA	NA	NA	NA	NA	6.863	2.37	NA	NA	NA	NA	NA	NA	NA	NA
chr1:1275029-1275115/-	NA	NA	NA	NA	NA	NA	NA	NA	NA	NA	NA	NA	NA	NA	NA	NA	NA	NA	NA	NA	22.772	4.435	NA	NA	NA	NA	NA	NA	NA	NA
chr1:143916308-144013900/+	NA	NA	1.48	0.389	NA	NA	NA	NA	NA	NA	NA	NA	NA	NA	NA	NA	NA	NA	NA	NA	NA	NA	NA	NA	NA	NA	NA	NA	NA	NA
chr1:144606510-144606837/+	NA	NA	82.353	22.917	NA	NA	NA	NA	NA	NA	NA	NA	NA	NA	NA	NA	NA	NA	NA	NA	NA	NA	NA	NA	NA	NA	NA	NA	NA	NA
chr1:144614993-144615095/+	NA	NA	NA	NA	NA	NA	NA	NA	NA	NA	NA	NA	20.635	20	NA	NA	NA	NA	NA	NA	NA	NA	NA	NA	NA	NA	NA	NA	NA	NA
chr1:144904737-144906058/-	NA	NA	NA	NA	NA	NA	1.866	0	NA	NA	NA	NA	NA	NA	NA	NA	NA	NA	NA	NA	NA	NA	NA	NA	NA	NA	NA	NA	NA	NA
chr1:144922047-144922186/-	NA	NA	NA	NA	NA	NA	7.618	0.909	NA	NA	NA	NA	NA	NA	NA	NA	NA	NA	NA	NA	NA	NA	NA	NA	NA	NA	NA	NA	NA	NA
chr1:144994701-145015859/-	NA	NA	NA	NA	10.511	3.922	NA	NA	NA	NA	NA	NA	NA	NA	NA	NA	NA	NA	NA	NA	NA	NA	NA	NA	NA	NA	NA	NA	NA	NA
chr1:145109684-145112372/+	NA	NA	NA	NA	NA	NA	NA	NA	NA	NA	NA	NA	8.738	4.69	NA	NA	NA	NA	NA	NA	NA	NA	NA	NA	NA	NA	NA	NA	NA	NA
chr1:145580322-145580504/+	NA	NA	10.68	3.448	NA	NA	NA	NA	NA	NA	NA	NA	NA	NA	NA	NA	NA	NA	NA	NA	NA	NA	NA	NA	NA	NA	NA	NA	NA	NA
chr1:145594994-145595118/-	NA	NA	NA	NA	55.224	5.96	NA	NA	NA	NA	NA	NA	NA	NA	NA	NA	NA	NA	NA	NA	NA	NA	NA	NA	NA	NA	NA	NA	NA	NA
chr1:145601622-145601747/-	2.507	0.166	1.692	0.999	2.538	0.683	4.242	1.662	NA	NA	NA	NA	NA	NA	NA	NA	NA	NA	NA	NA	NA	NA	NA	NA	NA	NA	NA	NA	NA	NA
chr1:145683647-145684584/+	NA	NA	NA	NA	5.263	2.488	NA	NA	NA	NA	NA	NA	NA	NA	NA	NA	NA	NA	NA	NA	NA	NA	NA	NA	NA	NA	NA	NA	NA	NA
chr1:146742666-146743831/+	7.071	1.734	NA	NA	NA	NA	NA	NA	NA	NA	NA	NA	NA	NA	NA	NA	NA	NA	NA	NA	NA	NA	NA	NA	NA	NA	NA	NA	NA	NA
chr1:146743942-146747016/+	15.315	7.116	NA	NA	NA	NA	17.778	3.832	NA	NA	NA	NA	NA	NA	NA	NA	NA	NA	NA	NA	NA	NA	NA	NA	NA	NA	NA	NA	NA	NA
chr1:147122041-147124251/-	8.609	3.497	NA	NA	41.549	26.518	NA	NA	NA	NA	NA	NA	NA	NA	NA	NA	NA	NA	NA	NA	NA	NA	NA	NA	100	22.449	NA	NA	NA	NA
chr1:147124352-147126308/-	5.485	4.348	NA	NA	NA	NA	NA	NA	NA	NA	NA	NA	NA	NA	NA	NA	NA	NA	NA	NA	NA	NA	NA	NA	NA	NA	NA	NA	NA	NA
chr1:149882255-149882377/-	NA	NA	NA	NA	2.346	0.241	NA	NA	NA	NA	NA	NA	NA	NA	NA	NA	NA	NA	NA	NA	NA	NA	NA	NA	NA	NA	NA	NA	NA	NA
chr1:150463987-150464073/+	NA	NA	4.727	2.756	NA	NA	NA	NA	NA	NA	NA	NA	NA	NA	NA	NA	NA	NA	NA	NA	NA	NA	NA	NA	NA	NA	NA	NA	NA	NA
chr1:150933667-150934605/+	14.474	11.111	NA	NA	NA	NA	NA	NA	27.692	15.676	NA	NA	NA	NA	NA	NA	NA	NA	NA	NA	NA	NA	NA	NA	NA	NA	NA	NA	NA	NA
chr1:151196755-151199795/+	NA	NA	NA	NA	NA	NA	NA	NA	NA	NA	NA	NA	NA	NA	NA	NA	NA	NA	NA	NA	NA	NA	NA	NA	29.293	0	NA	NA	NA	NA
chr1:151204277-151204723/+	NA	NA	NA	NA	NA	NA	NA	NA	2.453	0.155	NA	NA	4.082	0.381	NA	NA	NA	NA	NA	NA	NA	NA	NA	NA	NA	NA	NA	NA	NA	NA
chr1:151204841-151205026/+	NA	NA	NA	NA	NA	NA	NA	NA	1.128	0	NA	NA	NA	NA	NA	NA	NA	NA	NA	NA	NA	NA	NA	NA	NA	NA	NA	NA	NA	NA
chr1:151214745-151214913/+	NA	NA	7.4	0.858	NA	NA	NA	NA	NA	NA	8.635	0.617	NA	NA	NA	NA	NA	NA	NA	NA	NA	NA	NA	NA	NA	NA	NA	NA	NA	NA
chr1:151237710-151237869/+	2.517	0.547	NA	NA	NA	NA	NA	NA	11.111	0.58	NA	NA	NA	NA	NA	NA	NA	NA	5.172	0.211	NA	NA	NA	NA	NA	NA	NA	NA	NA	NA
chr1:151238085-151238479/+	0.839	0.373	NA	NA	NA	NA	NA	NA	NA	NA	NA	NA	NA	NA	NA	NA	NA	NA	NA	NA	NA	NA	NA	NA	NA	NA	NA	NA	NA	NA
chr1:151261747-151261853/+	NA	NA	NA	NA	6.024	3.376	NA	NA	NA	NA	NA	NA	NA	NA	NA	NA	NA	NA	NA	NA	NA	NA	NA	NA	NA	NA	NA	NA	NA	NA
chr1:151316754-151316892/-	NA	NA	NA	NA	NA	NA	NA	NA	4.651	2.439	NA	NA	NA	NA	NA	NA	NA	NA	NA	NA	NA	NA	NA	NA	NA	NA	NA	NA	NA	NA
chr1:151380716-151380884/-	NA	NA	NA	NA	NA	NA	NA	NA	NA	NA	NA	NA	NA	NA	NA	NA	NA	NA	NA	NA	NA	NA	NA	NA	10.87	9.091	NA	NA	NA	NA
chr1:151396027-151396424/-	NA	NA	NA	NA	NA	NA	NA	NA	NA	NA	NA	NA	NA	NA	NA	NA	NA	NA	NA	NA	NA	NA	NA	NA	6.667	0.328	NA	NA	NA	NA
chr1:151396762-151397430/-	NA	NA	NA	NA	NA	NA	NA	NA	NA	NA	NA	NA	NA	NA	NA	NA	NA	NA	NA	NA	NA	NA	NA	NA	21.591	10.778	NA	NA	NA	NA
chr1:151397537-151400298/-	3.187	2.179	NA	NA	NA	NA	NA	NA	NA	NA	NA	NA	NA	NA	NA	NA	NA	NA	NA	NA	NA	NA	NA	NA	14.839	13.333	NA	NA	NA	NA
chr1:151400517-151400598/-	7.089	1.292	7.651	0.8	NA	NA	NA	NA	NA	NA	7.06	1.266	9.67	1.139	NA	NA	NA	NA	NA	NA	NA	NA	NA	NA	7.792	0.339	NA	NA	NA	NA
chr1:151400889-151402078/-	NA	NA	NA	NA	NA	NA	NA	NA	NA	NA	4.948	0.634	NA	NA	NA	NA	NA	NA	NA	NA	NA	NA	NA	NA	13.636	1.408	NA	NA	NA	NA
chr1:151402187-151403141/-	NA	NA	NA	NA	1.246	0.956	NA	NA	NA	NA	NA	NA	NA	NA	NA	NA	NA	NA	NA	NA	NA	NA	NA	NA	7.463	1.399	NA	NA	NA	NA
chr1:151403317-151413403/-	NA	NA	NA	NA	NA	NA	NA	NA	NA	NA	NA	NA	NA	NA	NA	NA	NA	NA	NA	NA	NA	NA	NA	NA	11.111	4.494	NA	NA	NA	NA
chr1:151413562-151414556/-	NA	NA	NA	NA	NA	NA	NA	NA	NA	NA	NA	NA	NA	NA	NA	NA	NA	NA	NA	NA	NA	NA	NA	NA	16.456	0.87	NA	NA	NA	NA
chr1:151536466-151537000/+	NA	NA	40.87	0.82	NA	NA	NA	NA	NA	NA	NA	NA	NA	NA	NA	NA	NA	NA	NA	NA	NA	NA	NA	NA	NA	NA	NA	NA	NA	NA
chr1:153636606-153636871/-	NA	NA	NA	NA	NA	NA	1.574	0.387	NA	NA	NA	NA	NA	NA	NA	NA	NA	NA	NA	NA	NA	NA	NA	NA	NA	NA	NA	NA	NA	NA
chr1:153637812-153638138/-	NA	NA	NA	NA	1.103	0.435	1.22	0.516	NA	NA	NA	NA	NA	NA	NA	NA	NA	NA	NA	NA	NA	NA	NA	NA	NA	NA	NA	NA	NA	NA
chr1:153638204-153640030/-	NA	NA	NA	NA	1.305	0.429	0.654	0.213	NA	NA	NA	NA	NA	NA	NA	NA	NA	NA	NA	NA	NA	NA	NA	NA	NA	NA	NA	NA	NA	NA
chr1:153719546-153719754/+	21.687	16.364	NA	NA	NA	NA	NA	NA	NA	NA	NA	NA	NA	NA	NA	NA	NA	NA	NA	NA	NA	NA	NA	NA	NA	NA	NA	NA	NA	NA
chr1:153721231-153723570/+	NA	NA	NA	NA	6.892	0.615	NA	NA	NA	NA	NA	NA	NA	NA	NA	NA	NA	NA	NA	NA	NA	NA	NA	NA	NA	NA	NA	NA	NA	NA
chr1:153723715-153724754/+	NA	NA	7.212	1.97	NA	NA	NA	NA	NA	NA	NA	NA	7.296	1.138	NA	NA	NA	NA	NA	NA	NA	NA	NA	NA	NA	NA	NA	NA	NA	NA
chr1:153732089-153732786/+	1.832	1.389	NA	NA	NA	NA	NA	NA	NA	NA	NA	NA	7.451	0.909	NA	NA	NA	NA	NA	NA	NA	NA	NA	NA	NA	NA	NA	NA	NA	NA
chr1:153732866-153733302/+	NA	NA	NA	NA	NA	NA	NA	NA	2.529	0	2.326	0.193	NA	NA	NA	NA	NA	NA	NA	NA	NA	NA	NA	NA	NA	NA	NA	NA	NA	NA
chr1:153733394-153733495/+	NA	NA	59.091	54.386	NA	NA	NA	NA	47.826	27.273	NA	NA	60.976	35.897	NA	NA	NA	NA	NA	NA	NA	NA	NA	NA	NA	NA	NA	NA	NA	NA
chr1:153733585-153734045/+	NA	NA	NA	NA	100	22.449	NA	NA	NA	NA	NA	NA	51.515	23.438	NA	NA	NA	NA	NA	NA	NA	NA	NA	NA	NA	NA	NA	NA	NA	NA
chr1:153735323-153735708/+	NA	NA	NA	NA	NA	NA	NA	NA	NA	NA	NA	NA	7.483	0.563	NA	NA	NA	NA	NA	NA	NA	NA	NA	NA	NA	NA	NA	NA	NA	NA
chr1:153790018-153790515/-	4.683	1.266	NA	NA	NA	NA	NA	NA	NA	NA	NA	NA	NA	NA	NA	NA	NA	NA	NA	NA	NA	NA	NA	NA	NA	NA	NA	NA	NA	NA
chr1:153905253-153905336/-	10.345	1.923	NA	NA	NA	NA	NA	NA	NA	NA	NA	NA	NA	NA	NA	NA	NA	NA	NA	NA	NA	NA	NA	NA	NA	NA	NA	NA	NA	NA
chr1:153905506-153905672/-	18.519	3.061	NA	NA	NA	NA	NA	NA	NA	NA	NA	NA	NA	NA	NA	NA	NA	NA	NA	NA	NA	NA	NA	NA	NA	NA	NA	NA	NA	NA
chr1:153925126-153925280/-	NA	NA	NA	NA	57.143	46.939	NA	NA	NA	NA	NA	NA	NA	NA	NA	NA	NA	NA	NA	NA	NA	NA	NA	NA	NA	NA	NA	NA	NA	NA
chr1:154184854-154184933/-	NA	NA	NA	NA	0.749	0.25	NA	NA	NA	NA	NA	NA	NA	NA	NA	NA	NA	NA	NA	NA	NA	NA	NA	NA	NA	NA	NA	NA	NA	NA
chr1:154185100-154186368/-	NA	NA	NA	NA	0.99	0.218	NA	NA	NA	NA	NA	NA	NA	NA	NA	NA	NA	NA	NA	NA	NA	NA	NA	NA	NA	NA	NA	NA	NA	NA
chr1:154197689-154199757/+	5.539	0.532	NA	NA	NA	NA	NA	NA	NA	NA	NA	NA	NA	NA	NA	NA	NA	NA	NA	NA	NA	NA	NA	NA	NA	NA	NA	NA	NA	NA
chr1:154209612-154213988/+	NA	NA	NA	NA	NA	NA	NA	NA	NA	NA	NA	NA	NA	NA	NA	NA	NA	NA	NA	NA	NA	NA	NA	NA	20.833	0.358	NA	NA	NA	NA
chr1:154214041-154215692/+	10.383	2.105	NA	NA	NA	NA	18.689	3.008	NA	NA	NA	NA	NA	NA	3.963	1.921	NA	NA	NA	NA	NA	NA	NA	NA	50	3.625	NA	NA	NA	NA
chr1:154215778-154218679/+	NA	NA	NA	NA	NA	NA	2.376	0	NA	NA	NA	NA	NA	NA	NA	NA	NA	NA	NA	NA	NA	NA	NA	NA	NA	NA	NA	NA	NA	NA
chr1:154221913-154223516/+	NA	NA	NA	NA	1.481	0.475	NA	NA	NA	NA	NA	NA	NA	NA	NA	NA	NA	NA	NA	NA	NA	NA	NA	NA	NA	NA	NA	NA	NA	NA
chr1:154227802-154228158/+	NA	NA	NA	NA	NA	NA	1.384	0.491	NA	NA	NA	NA	NA	NA	NA	NA	NA	NA	NA	NA	NA	NA	NA	NA	NA	NA	NA	NA	NA	NA
chr1:154234173-154238976/+	NA	NA	NA	NA	NA	NA	NA	NA	NA	NA	NA	NA	NA	NA	NA	NA	NA	NA	10.791	1.639	18.39	3.519	NA	NA	NA	NA	NA	NA	NA	NA
chr1:154302930-154303290/+	NA	NA	NA	NA	NA	NA	NA	NA	NA	NA	NA	NA	NA	NA	NA	NA	5.06	2.857	NA	NA	NA	NA	NA	NA	NA	NA	NA	NA	NA	NA
chr1:154569471-154569598/-	NA	NA	NA	NA	NA	NA	NA	NA	NA	NA	NA	NA	NA	NA	NA	NA	0.389	0.054	NA	NA	NA	NA	NA	NA	NA	NA	NA	NA	NA	NA
chr1:154940733-154940970/-	NA	NA	2.932	0.376	NA	NA	NA	NA	NA	NA	NA	NA	NA	NA	NA	NA	NA	NA	NA	NA	NA	NA	NA	NA	NA	NA	NA	NA	NA	NA
chr1:155167719-155167832/-	22.069	1.695	NA	NA	NA	NA	NA	NA	NA	NA	NA	NA	NA	NA	NA	NA	NA	NA	NA	NA	NA	NA	NA	NA	NA	NA	NA	NA	NA	NA
chr1:155168011-155168199/-	27.526	2.899	NA	NA	NA	NA	NA	NA	NA	NA	NA	NA	NA	NA	NA	NA	NA	NA	NA	NA	NA	NA	NA	NA	NA	NA	NA	NA	NA	NA
chr1:155169647-155169785/-	16.968	6.306	NA	NA	NA	NA	NA	NA	NA	NA	NA	NA	NA	NA	NA	NA	NA	NA	NA	NA	NA	NA	NA	NA	NA	NA	NA	NA	NA	NA
chr1:155170401-155170687/-	17.582	3.067	NA	NA	NA	NA	NA	NA	NA	NA	NA	NA	NA	NA	NA	NA	NA	NA	NA	NA	NA	NA	NA	NA	NA	NA	NA	NA	NA	NA
chr1:155171360-155171747/-	7.955	3.614	NA	NA	NA	NA	NA	NA	NA	NA	NA	NA	NA	NA	NA	NA	NA	NA	NA	NA	NA	NA	NA	NA	NA	NA	NA	NA	NA	NA
chr1:155172192-155172602/-	11.864	5.085	NA	NA	NA	NA	NA	NA	NA	NA	NA	NA	NA	NA	NA	NA	NA	NA	NA	NA	NA	NA	NA	NA	NA	NA	NA	NA	NA	NA
chr1:155172751-155172876/-	28.814	5.263	NA	NA	NA	NA	NA	NA	NA	NA	NA	NA	NA	NA	NA	NA	NA	NA	NA	NA	NA	NA	NA	NA	NA	NA	NA	NA	NA	NA
chr1:155173096-155173303/-	33.913	9.434	NA	NA	NA	NA	NA	NA	NA	NA	NA	NA	NA	NA	NA	NA	NA	NA	NA	NA	NA	NA	NA	NA	NA	NA	NA	NA	NA	NA
chr1:155234341-155234435/-	NA	NA	25.911	1.877	NA	NA	NA	NA	NA	NA	NA	NA	NA	NA	NA	NA	NA	NA	NA	NA	NA	NA	NA	NA	NA	NA	NA	NA	NA	NA
chr1:155235745-155236519/-	NA	NA	NA	NA	NA	NA	10.438	2.53	NA	NA	NA	NA	NA	NA	8.614	1.992	NA	NA	NA	NA	NA	NA	NA	NA	NA	NA	NA	NA	NA	NA
chr1:155238150-155238498/-	NA	NA	NA	NA	NA	NA	NA	NA	NA	NA	NA	NA	NA	NA	NA	NA	NA	NA	NA	NA	NA	NA	62.5	12.821	NA	NA	NA	NA	NA	NA
chr1:155287812-155287959/+	NA	NA	NA	NA	NA	NA	2.647	0.458	NA	NA	NA	NA	NA	NA	NA	NA	NA	NA	NA	NA	NA	NA	NA	NA	NA	NA	NA	NA	NA	NA
chr1:155288082-155288455/+	NA	NA	NA	NA	NA	NA	7.143	5.278	3.709	3.369	NA	NA	NA	NA	NA	NA	NA	NA	NA	NA	NA	NA	NA	NA	NA	NA	NA	NA	NA	NA
chr1:155408859-155429587/-	NA	NA	4.348	0	NA	NA	4.386	0	NA	NA	NA	NA	NA	NA	NA	NA	NA	NA	NA	NA	NA	NA	NA	NA	NA	NA	NA	NA	NA	NA
chr1:155649303-155649718/-	NA	NA	NA	NA	NA	NA	100	47.126	NA	NA	NA	NA	77.778	57.377	NA	NA	NA	NA	NA	NA	NA	NA	NA	NA	NA	NA	NA	NA	NA	NA
chr1:155695281-155695717/+	NA	NA	NA	NA	2.954	0.863	NA	NA	NA	NA	NA	NA	4.719	0.828	NA	NA	NA	NA	NA	NA	NA	NA	NA	NA	NA	NA	NA	NA	5.291	1.772
chr1:155727114-155727681/-	NA	NA	19.497	7.042	NA	NA	NA	NA	NA	NA	NA	NA	NA	NA	NA	NA	NA	NA	NA	NA	NA	NA	NA	NA	NA	NA	NA	NA	NA	NA
chr1:155753880-155755124/-	NA	NA	NA	NA	NA	NA	8.621	0.971	NA	NA	NA	NA	NA	NA	NA	NA	NA	NA	NA	NA	NA	NA	NA	NA	NA	NA	NA	NA	NA	NA
chr1:155891419-155891651/-	NA	NA	NA	NA	11.486	3.422	NA	NA	NA	NA	NA	NA	NA	NA	NA	NA	NA	NA	11.864	5.205	NA	NA	NA	NA	38.462	1.695	NA	NA	NA	NA
chr1:155895634-155896466/-	NA	NA	9.402	0.79	NA	NA	4.453	0.856	NA	NA	NA	NA	NA	NA	NA	NA	NA	NA	NA	NA	NA	NA	NA	NA	NA	NA	NA	NA	NA	NA
chr1:155896630-155896894/-	NA	NA	NA	NA	7.853	1.761	NA	NA	NA	NA	NA	NA	NA	NA	NA	NA	NA	NA	NA	NA	NA	NA	NA	NA	NA	NA	NA	NA	NA	NA
chr1:155939091-155952897/-	NA	NA	NA	NA	NA	NA	NA	NA	NA	NA	3.888	2.415	NA	NA	NA	NA	NA	NA	NA	NA	NA	NA	NA	NA	NA	NA	NA	NA	NA	NA
chr1:156104766-156104977/+	NA	NA	NA	NA	5.347	0.174	NA	NA	NA	NA	NA	NA	NA	NA	NA	NA	NA	NA	NA	NA	NA	NA	NA	NA	NA	NA	NA	NA	NA	NA
chr1:156105103-156105691/+	5.237	0.408	NA	NA	NA	NA	NA	NA	NA	NA	NA	NA	NA	NA	NA	NA	NA	NA	NA	NA	NA	NA	NA	NA	NA	NA	NA	NA	NA	NA
chr1:156105912-156106004/+	2.696	0.499	NA	NA	NA	NA	NA	NA	NA	NA	NA	NA	NA	NA	NA	NA	NA	NA	NA	NA	NA	NA	NA	NA	NA	NA	NA	NA	NA	NA
chr1:156106227-156106711/+	0.542	0.424	NA	NA	0.74	0.137	NA	NA	NA	NA	NA	NA	NA	NA	NA	NA	NA	NA	NA	NA	NA	NA	NA	NA	NA	NA	NA	NA	NA	NA
chr1:156106819-156106903/+	NA	NA	NA	NA	1.344	0.599	NA	NA	NA	NA	NA	NA	NA	NA	NA	NA	NA	NA	NA	NA	NA	NA	NA	NA	NA	NA	NA	NA	NA	NA
chr1:156243241-156244387/-	NA	NA	NA	NA	NA	NA	3.927	0.917	NA	NA	NA	NA	NA	NA	NA	NA	NA	NA	NA	NA	NA	NA	NA	NA	NA	NA	NA	NA	NA	NA
chr1:156247032-156247715/-	NA	NA	NA	NA	NA	NA	7.692	0.491	NA	NA	NA	NA	NA	NA	NA	NA	NA	NA	NA	NA	NA	NA	NA	NA	NA	NA	NA	NA	NA	NA
chr1:156304566-156304658/-	NA	NA	NA	NA	0.415	0.181	NA	NA	NA	NA	NA	NA	NA	NA	NA	NA	NA	NA	NA	NA	NA	NA	NA	NA	NA	NA	NA	NA	NA	NA
chr1:156304709-156305617/-	NA	NA	NA	NA	NA	NA	1.084	0.456	NA	NA	NA	NA	NA	NA	NA	NA	NA	NA	NA	NA	NA	NA	NA	NA	NA	NA	NA	NA	NA	NA
chr1:156533104-156533344/-	NA	NA	NA	NA	NA	NA	NA	NA	3.333	0	NA	NA	NA	NA	NA	NA	NA	NA	NA	NA	NA	NA	NA	NA	NA	NA	NA	NA	NA	NA
chr1:156533458-156533548/-	NA	NA	NA	NA	NA	NA	NA	NA	5.759	1.449	NA	NA	NA	NA	NA	NA	NA	NA	NA	NA	NA	NA	NA	NA	NA	NA	NA	NA	NA	NA
chr1:156756966-156761488/+	NA	NA	NA	NA	8.203	4.218	NA	NA	NA	NA	NA	NA	NA	NA	NA	NA	NA	NA	NA	NA	NA	NA	NA	NA	NA	NA	NA	NA	NA	NA
chr1:156843751-156844174/+	NA	NA	NA	NA	55.556	47.826	NA	NA	NA	NA	NA	NA	NA	NA	NA	NA	NA	NA	NA	NA	NA	NA	NA	NA	NA	NA	NA	NA	NA	NA
chr1:15890606-15890777/+	NA	NA	2.27	0	NA	NA	NA	NA	NA	NA	NA	NA	NA	NA	NA	NA	NA	NA	NA	NA	NA	NA	NA	NA	NA	NA	NA	NA	NA	NA
chr1:160207019-160208396/-	NA	NA	NA	NA	NA	NA	3.727	0.705	NA	NA	NA	NA	NA	NA	NA	NA	NA	NA	NA	NA	NA	NA	NA	NA	NA	NA	NA	NA	NA	NA
chr1:160208537-160209486/-	NA	NA	NA	NA	NA	NA	18.75	5.276	NA	NA	NA	NA	NA	NA	NA	NA	9.091	5.008	8.421	6.393	NA	NA	NA	NA	50	23.333	NA	NA	NA	NA
chr1:160275388-160275477/-	NA	NA	16.949	4.255	NA	NA	NA	NA	NA	NA	NA	NA	NA	NA	NA	NA	NA	NA	NA	NA	NA	NA	NA	NA	NA	NA	NA	NA	NA	NA
chr1:160275563-160276143/-	NA	NA	3.47	1.277	NA	NA	NA	NA	NA	NA	1.087	0.638	NA	NA	NA	NA	NA	NA	1.92	0.542	NA	NA	NA	NA	NA	NA	NA	NA	NA	NA
chr1:160276283-160276952/-	NA	NA	1.505	0.55	NA	NA	NA	NA	NA	NA	NA	NA	NA	NA	NA	NA	NA	NA	NA	NA	NA	NA	NA	NA	NA	NA	NA	NA	NA	NA
chr1:160277035-160278890/-	NA	NA	5.028	2.272	NA	NA	NA	NA	NA	NA	NA	NA	NA	NA	NA	NA	NA	NA	NA	NA	NA	NA	NA	NA	NA	NA	NA	NA	NA	NA
chr1:160303469-160305031/-	NA	NA	NA	NA	0.524	0.313	NA	NA	NA	NA	NA	NA	NA	NA	NA	NA	NA	NA	NA	NA	NA	NA	NA	NA	NA	NA	NA	NA	NA	NA
chr1:160323027-160323907/+	NA	NA	NA	NA	NA	NA	NA	NA	NA	NA	NA	NA	12.438	6.05	NA	NA	NA	NA	NA	NA	NA	NA	NA	NA	NA	NA	NA	NA	NA	NA
chr1:16044487-16045032/+	NA	NA	NA	NA	2.66	0.161	NA	NA	NA	NA	1.405	0.129	NA	NA	NA	NA	NA	NA	NA	NA	NA	NA	NA	NA	NA	NA	NA	NA	NA	NA
chr1:16046415-16047823/+	NA	NA	5.566	1.765	NA	NA	NA	NA	NA	NA	NA	NA	NA	NA	NA	NA	NA	NA	NA	NA	NA	NA	NA	NA	NA	NA	NA	NA	NA	NA
chr1:16091180-16091458/+	NA	NA	NA	NA	NA	NA	NA	NA	NA	NA	NA	NA	NA	NA	10.701	1.51	NA	NA	NA	NA	12.841	3.988	NA	NA	NA	NA	NA	NA	NA	NA
chr1:161139510-161139695/+	NA	NA	NA	NA	NA	NA	NA	NA	NA	NA	NA	NA	NA	NA	22.034	17.391	NA	NA	NA	NA	NA	NA	NA	NA	NA	NA	NA	NA	NA	NA
chr1:16199631-16202696/+	12.651	6.849	NA	NA	NA	NA	37.725	33.333	NA	NA	NA	NA	NA	NA	NA	NA	NA	NA	NA	NA	NA	NA	NA	NA	72.414	27.132	NA	NA	NA	NA
chr1:162536138-162546566/+	NA	NA	NA	NA	NA	NA	3.898	0.362	NA	NA	NA	NA	NA	NA	NA	NA	NA	NA	NA	NA	NA	NA	NA	NA	NA	NA	NA	NA	NA	NA
chr1:162722987-162724413/+	NA	NA	NA	NA	1.293	0	NA	NA	NA	NA	1.145	0.037	NA	NA	NA	NA	NA	NA	NA	NA	NA	NA	NA	NA	NA	NA	NA	NA	NA	NA
chr1:162724645-162724945/+	NA	NA	NA	NA	NA	NA	NA	NA	NA	NA	0.583	0.063	NA	NA	NA	NA	NA	NA	NA	NA	NA	NA	NA	NA	NA	NA	NA	NA	NA	NA
chr1:163131766-163138047/-	NA	NA	NA	NA	2.08	0.103	NA	NA	NA	NA	NA	NA	NA	NA	NA	NA	NA	NA	NA	NA	NA	NA	NA	NA	NA	NA	NA	NA	NA	NA
chr1:16464680-16464769/-	NA	NA	1.286	1.099	NA	NA	NA	NA	NA	NA	NA	NA	NA	NA	NA	NA	NA	NA	NA	NA	NA	NA	NA	NA	NA	NA	NA	NA	NA	NA
chr1:164776914-164781226/+	5.325	0.319	NA	NA	NA	NA	NA	NA	NA	NA	NA	NA	NA	NA	NA	NA	NA	NA	NA	NA	NA	NA	NA	NA	NA	NA	NA	NA	NA	NA
chr1:164781386-164789308/+	7.792	2.83	NA	NA	NA	NA	NA	NA	NA	NA	NA	NA	NA	NA	NA	NA	NA	NA	NA	NA	NA	NA	NA	NA	NA	NA	NA	NA	NA	NA
chr1:164789421-164790773/+	10.241	2.222	NA	NA	17.914	2.727	NA	NA	NA	NA	NA	NA	NA	NA	NA	NA	NA	NA	NA	NA	NA	NA	NA	NA	NA	NA	NA	NA	NA	NA
chr1:16528356-16528910/-	NA	NA	NA	NA	14.943	2.256	NA	NA	NA	NA	NA	NA	NA	NA	NA	NA	8.808	2.906	NA	NA	NA	NA	NA	NA	NA	NA	NA	NA	NA	NA
chr1:165859600-165860462/+	NA	NA	NA	NA	NA	NA	NA	NA	NA	NA	NA	NA	NA	NA	NA	NA	2.492	0.248	NA	NA	NA	NA	NA	NA	NA	NA	NA	NA	NA	NA
chr1:165860559-165865426/+	NA	NA	NA	NA	NA	NA	NA	NA	NA	NA	NA	NA	NA	NA	NA	NA	5.071	0.93	NA	NA	NA	NA	NA	NA	9.565	0.714	NA	NA	NA	NA
chr1:166831649-166833060/-	NA	NA	NA	NA	15.702	5.512	NA	NA	NA	NA	NA	NA	NA	NA	NA	NA	NA	NA	NA	NA	NA	NA	NA	NA	NA	NA	NA	NA	NA	NA
chr1:16774469-16774554/+	5.112	0.186	NA	NA	NA	NA	NA	NA	NA	NA	NA	NA	NA	NA	NA	NA	NA	NA	NA	NA	NA	NA	NA	NA	NA	NA	NA	NA	NA	NA
chr1:170689042-170695360/+	NA	NA	NA	NA	NA	NA	NA	NA	NA	NA	5.572	0.609	NA	NA	NA	NA	NA	NA	NA	NA	NA	NA	NA	NA	NA	NA	NA	NA	NA	NA
chr1:171492493-171492573/+	NA	NA	NA	NA	2.459	0	4.043	0.704	NA	NA	NA	NA	NA	NA	NA	NA	NA	NA	NA	NA	NA	NA	NA	NA	NA	NA	NA	NA	NA	NA
chr1:171759756-171761156/+	NA	NA	NA	NA	NA	NA	NA	NA	NA	NA	NA	NA	16.129	4.348	NA	NA	NA	NA	NA	NA	NA	NA	NA	NA	NA	NA	NA	NA	NA	NA
chr1:172520766-172522399/+	NA	NA	NA	NA	NA	NA	NA	NA	NA	NA	NA	NA	NA	NA	NA	NA	NA	NA	NA	NA	NA	NA	NA	NA	16.216	7.071	NA	NA	NA	NA
chr1:172522510-172525008/+	NA	NA	NA	NA	NA	NA	NA	NA	NA	NA	NA	NA	NA	NA	NA	NA	NA	NA	NA	NA	NA	NA	NA	NA	39.286	7.692	NA	NA	NA	NA
chr1:172546699-172546903/+	18.681	2.804	NA	NA	12	0	10.27	5.882	NA	NA	NA	NA	NA	NA	NA	NA	NA	NA	NA	NA	NA	NA	NA	NA	NA	NA	NA	NA	NA	NA
chr1:1737977-1747194/-	NA	NA	NA	NA	NA	NA	NA	NA	0.67	0.083	NA	NA	NA	NA	NA	NA	NA	NA	NA	NA	NA	NA	NA	NA	NA	NA	NA	NA	NA	NA
chr1:174241618-174244970/+	NA	NA	NA	NA	NA	NA	6.349	0.787	NA	NA	NA	NA	NA	NA	NA	NA	NA	NA	NA	NA	NA	NA	NA	NA	NA	NA	NA	NA	NA	NA
chr1:1747301-1749275/-	NA	NA	NA	NA	NA	NA	0.806	0.086	NA	NA	NA	NA	2.646	0.207	NA	NA	NA	NA	NA	NA	NA	NA	NA	NA	NA	NA	NA	NA	NA	NA
chr1:1749314-1756835/-	NA	NA	NA	NA	NA	NA	NA	NA	NA	NA	NA	NA	NA	NA	NA	NA	0.782	0.283	NA	NA	NA	NA	NA	NA	NA	NA	NA	NA	NA	NA
chr1:176085817-176104145/-	NA	NA	3.358	0.188	NA	NA	NA	NA	NA	NA	NA	NA	NA	NA	NA	NA	NA	NA	NA	NA	NA	NA	NA	NA	NA	NA	NA	NA	NA	NA
chr1:179033233-179033439/+	NA	NA	NA	NA	4.1	1.066	NA	NA	3.24	0.27	4.529	0.852	NA	NA	3.106	0.136	NA	NA	NA	NA	NA	NA	NA	NA	NA	NA	NA	NA	NA	NA
chr1:179086651-179087721/-	NA	NA	NA	NA	NA	NA	NA	NA	NA	NA	NA	NA	NA	NA	NA	NA	NA	NA	NA	NA	13.021	2.703	NA	NA	NA	NA	NA	NA	NA	NA
chr1:17949670-17950881/+	NA	NA	8.494	3.448	NA	NA	NA	NA	NA	NA	NA	NA	NA	NA	NA	NA	NA	NA	NA	NA	NA	NA	NA	NA	NA	NA	NA	NA	NA	NA
chr1:17950998-17952450/+	NA	NA	3.418	0	NA	NA	NA	NA	NA	NA	NA	NA	NA	NA	NA	NA	NA	NA	NA	NA	NA	NA	NA	NA	NA	NA	NA	NA	NA	NA
chr1:17952543-17953824/+	NA	NA	2.301	0	NA	NA	NA	NA	NA	NA	NA	NA	NA	NA	NA	NA	NA	NA	NA	NA	NA	NA	NA	NA	NA	NA	NA	NA	NA	NA
chr1:179972422-179975588/+	NA	NA	NA	NA	NA	NA	NA	NA	NA	NA	NA	NA	NA	NA	NA	NA	NA	NA	NA	NA	NA	NA	NA	NA	20	0.606	NA	NA	NA	NA
chr1:180144501-180145065/+	NA	NA	NA	NA	NA	NA	NA	NA	NA	NA	2.813	0	NA	NA	NA	NA	NA	NA	NA	NA	NA	NA	NA	NA	NA	NA	NA	NA	NA	NA
chr1:180145168-180147928/+	NA	NA	NA	NA	NA	NA	NA	NA	NA	NA	2.917	0.243	NA	NA	NA	NA	NA	NA	NA	NA	NA	NA	NA	NA	NA	NA	NA	NA	NA	NA
chr1:180148019-180151308/+	NA	NA	NA	NA	NA	NA	NA	NA	NA	NA	NA	NA	9.402	0	NA	NA	NA	NA	NA	NA	NA	NA	NA	NA	NA	NA	NA	NA	NA	NA
chr1:180794079-180794300/+	NA	NA	NA	NA	NA	NA	NA	NA	1.437	0	NA	NA	NA	NA	NA	NA	NA	NA	NA	NA	NA	NA	NA	NA	NA	NA	NA	NA	NA	NA
chr1:180957481-180959119/-	NA	NA	NA	NA	NA	NA	NA	NA	NA	NA	NA	NA	NA	NA	NA	NA	NA	NA	NA	NA	NA	NA	NA	NA	29.412	6.173	NA	NA	NA	NA
chr1:181548360-181549730/+	NA	NA	NA	NA	NA	NA	NA	NA	NA	NA	NA	NA	0.775	0.348	NA	NA	NA	NA	NA	NA	NA	NA	NA	NA	NA	NA	NA	NA	NA	NA
chr1:182822553-182823164/+	NA	NA	NA	NA	NA	NA	1.987	0.476	NA	NA	NA	NA	NA	NA	NA	NA	NA	NA	NA	NA	NA	NA	NA	NA	NA	NA	NA	NA	NA	NA
chr1:182824848-182825666/+	NA	NA	NA	NA	NA	NA	37.523	11.486	NA	NA	NA	NA	NA	NA	NA	NA	NA	NA	NA	NA	NA	NA	NA	NA	NA	NA	NA	NA	NA	NA
chr1:182825713-182827238/+	NA	NA	NA	NA	NA	NA	3.039	0.906	NA	NA	NA	NA	NA	NA	NA	NA	NA	NA	NA	NA	NA	NA	NA	NA	NA	NA	NA	NA	NA	NA
chr1:182827375-182827685/+	NA	NA	NA	NA	NA	NA	2.92	0.143	NA	NA	NA	NA	NA	NA	NA	NA	NA	NA	NA	NA	NA	NA	NA	NA	NA	NA	NA	NA	NA	NA
chr1:182827775-182827867/+	NA	NA	NA	NA	NA	NA	1.748	0.248	0.715	0.162	NA	NA	NA	NA	NA	NA	NA	NA	NA	NA	NA	NA	NA	NA	NA	NA	NA	NA	NA	NA
chr1:182828029-182828174/+	NA	NA	NA	NA	NA	NA	2.194	0.089	NA	NA	NA	NA	NA	NA	NA	NA	NA	NA	NA	NA	NA	NA	NA	NA	NA	NA	NA	NA	NA	NA
chr1:182828252-182829127/+	NA	NA	NA	NA	NA	NA	1.905	0.293	NA	NA	NA	NA	NA	NA	NA	NA	NA	NA	NA	NA	NA	NA	NA	NA	NA	NA	NA	NA	NA	NA
chr1:182829319-182835578/+	NA	NA	NA	NA	NA	NA	2.584	0.413	NA	NA	NA	NA	NA	NA	NA	NA	NA	NA	NA	NA	NA	NA	NA	NA	NA	NA	NA	NA	NA	NA
chr1:182845398-182845581/+	NA	NA	NA	NA	NA	NA	NA	NA	NA	NA	NA	NA	1.645	0.182	NA	NA	NA	NA	NA	NA	NA	NA	NA	NA	NA	NA	NA	NA	NA	NA
chr1:182845676-182845964/+	1.136	0.276	NA	NA	1.411	0.31	0.936	0.128	NA	NA	NA	NA	NA	NA	NA	NA	NA	NA	NA	NA	NA	NA	NA	NA	NA	NA	NA	NA	NA	NA
chr1:182846038-182847155/+	1.873	0.877	NA	NA	NA	NA	NA	NA	NA	NA	4.1	0.576	NA	NA	NA	NA	NA	NA	NA	NA	NA	NA	NA	NA	NA	NA	NA	NA	NA	NA
chr1:182847308-182848384/+	NA	NA	NA	NA	NA	NA	NA	NA	NA	NA	NA	NA	NA	NA	NA	NA	NA	NA	1.792	0.042	NA	NA	NA	NA	NA	NA	NA	NA	NA	NA
chr1:182848545-182849631/+	3.498	0.515	NA	NA	NA	NA	NA	NA	NA	NA	NA	NA	NA	NA	NA	NA	NA	NA	NA	NA	NA	NA	NA	NA	NA	NA	NA	NA	NA	NA
chr1:182849743-182850398/+	3.06	0.67	NA	NA	NA	NA	1.754	0.528	NA	NA	NA	NA	NA	NA	NA	NA	NA	NA	NA	NA	NA	NA	NA	NA	NA	NA	NA	NA	NA	NA
chr1:182850560-182850654/+	3.306	1.05	NA	NA	NA	NA	3.752	1.383	NA	NA	NA	NA	3.067	1.792	NA	NA	NA	NA	NA	NA	NA	NA	NA	NA	NA	NA	NA	NA	NA	NA
chr1:183086577-183086668/+	NA	NA	NA	NA	2.354	0.875	NA	NA	NA	NA	8.437	0.05	NA	NA	NA	NA	NA	NA	NA	NA	NA	NA	NA	NA	NA	NA	NA	NA	NA	NA
chr1:183086858-183087168/+	NA	NA	NA	NA	NA	NA	NA	NA	NA	NA	2.07	0.093	NA	NA	NA	NA	NA	NA	NA	NA	NA	NA	NA	NA	NA	NA	NA	NA	NA	NA
chr1:183094685-183095254/+	NA	NA	NA	NA	NA	NA	NA	NA	NA	NA	0.173	0.014	NA	NA	NA	NA	NA	NA	NA	NA	NA	NA	NA	NA	NA	NA	NA	NA	NA	NA
chr1:183097885-183099478/+	NA	NA	NA	NA	NA	NA	NA	NA	NA	NA	2.791	0.08	NA	NA	NA	NA	NA	NA	NA	NA	NA	NA	NA	NA	NA	NA	NA	NA	NA	NA
chr1:183497162-183498026/+	NA	NA	2.528	1.97	NA	NA	NA	NA	NA	NA	NA	NA	NA	NA	NA	NA	NA	NA	NA	NA	NA	NA	NA	NA	NA	NA	NA	NA	NA	NA
chr1:185270328-185270565/-	NA	NA	NA	NA	20.648	4.803	NA	NA	NA	NA	NA	NA	NA	NA	NA	NA	NA	NA	NA	NA	NA	NA	NA	NA	NA	NA	NA	NA	NA	NA
chr1:185276271-185276620/-	NA	NA	NA	NA	26.241	1.587	NA	NA	NA	NA	NA	NA	NA	NA	NA	NA	NA	NA	NA	NA	NA	NA	NA	NA	NA	NA	NA	NA	NA	NA
chr1:186320602-186321107/-	NA	NA	NA	NA	NA	NA	3.18	0	NA	NA	NA	NA	NA	NA	NA	NA	NA	NA	NA	NA	NA	NA	NA	NA	NA	NA	NA	NA	NA	NA
chr1:186359983-186360827/+	NA	NA	NA	NA	NA	NA	3.242	0.804	NA	NA	NA	NA	NA	NA	NA	NA	NA	NA	NA	NA	NA	NA	NA	NA	NA	NA	NA	NA	NA	NA
chr1:192998579-192998661/-	NA	NA	NA	NA	NA	NA	4.782	1.117	NA	NA	NA	NA	NA	NA	NA	NA	NA	NA	NA	NA	NA	NA	NA	NA	NA	NA	NA	NA	NA	NA
chr1:19422146-19423016/-	NA	NA	NA	NA	21.127	3.876	NA	NA	NA	NA	NA	NA	NA	NA	NA	NA	NA	NA	NA	NA	NA	NA	NA	NA	NA	NA	NA	NA	NA	NA
chr1:19439361-19440192/-	NA	NA	NA	NA	8.571	0.778	NA	NA	NA	NA	NA	NA	NA	NA	NA	NA	NA	NA	NA	NA	NA	NA	NA	NA	NA	NA	NA	NA	NA	NA
chr1:19440321-19440438/-	NA	NA	NA	NA	3.901	0.31	NA	NA	NA	NA	NA	NA	NA	NA	NA	NA	NA	NA	NA	NA	NA	NA	NA	NA	NA	NA	NA	NA	NA	NA
chr1:19444404-19445365/-	NA	NA	NA	NA	8.095	0.881	NA	NA	NA	NA	NA	NA	NA	NA	NA	NA	NA	NA	NA	NA	NA	NA	NA	NA	NA	NA	NA	NA	NA	NA
chr1:19465714-19467281/-	NA	NA	NA	NA	10.356	1.626	NA	NA	NA	NA	NA	NA	NA	NA	NA	NA	NA	NA	NA	NA	NA	NA	NA	NA	NA	NA	NA	NA	NA	NA
chr1:19468018-19468140/-	NA	NA	NA	NA	6.158	0.267	NA	NA	NA	NA	NA	NA	NA	NA	NA	NA	NA	NA	NA	NA	NA	NA	NA	NA	NA	NA	NA	NA	NA	NA
chr1:19477287-19478136/-	NA	NA	NA	NA	5.744	0.794	NA	NA	NA	NA	NA	NA	NA	NA	NA	NA	NA	NA	NA	NA	NA	NA	NA	NA	NA	NA	NA	NA	NA	NA
chr1:19493725-19494520/-	NA	NA	NA	NA	NA	NA	NA	NA	NA	NA	NA	NA	4.739	0	NA	NA	NA	NA	NA	NA	NA	NA	NA	NA	NA	NA	NA	NA	NA	NA
chr1:19499587-19499674/-	NA	NA	3.299	0	NA	NA	NA	NA	NA	NA	NA	NA	NA	NA	NA	NA	NA	NA	NA	NA	NA	NA	NA	NA	NA	NA	NA	NA	NA	NA
chr1:19503221-19503954/-	0.495	0.254	NA	NA	NA	NA	NA	NA	NA	NA	NA	NA	NA	NA	NA	NA	NA	NA	NA	NA	NA	NA	NA	NA	NA	NA	NA	NA	NA	NA
chr1:19513795-19513934/-	1.072	0	NA	NA	NA	NA	NA	NA	NA	NA	NA	NA	NA	NA	NA	NA	NA	NA	NA	NA	NA	NA	NA	NA	NA	NA	NA	NA	NA	NA
chr1:19566940-19567509/-	NA	NA	NA	NA	NA	NA	NA	NA	NA	NA	6.504	1.325	NA	NA	NA	NA	NA	NA	NA	NA	NA	NA	NA	NA	NA	NA	NA	NA	NA	NA
chr1:19570201-19570443/-	NA	NA	NA	NA	NA	NA	8.228	7.317	NA	NA	NA	NA	NA	NA	NA	NA	NA	NA	NA	NA	NA	NA	NA	NA	NA	NA	NA	NA	NA	NA
chr1:196438198-196448308/-	NA	NA	NA	NA	NA	NA	NA	NA	NA	NA	NA	NA	NA	NA	NA	NA	11.538	5.263	NA	NA	NA	NA	NA	NA	NA	NA	NA	NA	NA	NA
chr1:197581106-197586788/-	NA	NA	NA	NA	NA	NA	7.143	2	NA	NA	NA	NA	NA	NA	NA	NA	NA	NA	NA	NA	NA	NA	NA	NA	NA	NA	NA	NA	NA	NA
chr1:198233365-198247090/+	NA	NA	NA	NA	NA	NA	4.803	0	NA	NA	NA	NA	NA	NA	NA	NA	NA	NA	NA	NA	NA	NA	NA	NA	NA	NA	NA	NA	NA	NA
chr1:200584737-200586739/-	NA	NA	NA	NA	NA	NA	NA	NA	NA	NA	NA	NA	14.634	4	NA	NA	NA	NA	NA	NA	NA	NA	NA	NA	NA	NA	NA	NA	NA	NA
chr1:201458112-201459303/-	NA	NA	6.237	2.322	NA	NA	NA	NA	NA	NA	NA	NA	NA	NA	NA	NA	NA	NA	NA	NA	NA	NA	NA	NA	NA	NA	NA	NA	NA	NA
chr1:201816766-201817520/+	NA	NA	NA	NA	NA	NA	5.054	0.229	NA	NA	NA	NA	NA	NA	NA	NA	NA	NA	NA	NA	NA	NA	NA	NA	NA	NA	NA	NA	NA	NA
chr1:201817722-201821231/+	NA	NA	NA	NA	NA	NA	5.66	0.718	NA	NA	NA	NA	NA	NA	NA	NA	NA	NA	NA	NA	NA	NA	NA	NA	NA	NA	NA	NA	NA	NA
chr1:201821320-201822138/+	2.618	0.305	NA	NA	NA	NA	6.466	1.422	NA	NA	NA	NA	6.072	1.186	NA	NA	NA	NA	NA	NA	NA	NA	NA	NA	NA	NA	NA	NA	NA	NA
chr1:201822225-201823722/+	NA	NA	NA	NA	NA	NA	5.134	0.528	NA	NA	NA	NA	NA	NA	NA	NA	NA	NA	NA	NA	NA	NA	NA	NA	NA	NA	NA	NA	NA	NA
chr1:201823842-201823950/+	NA	NA	NA	NA	NA	NA	6.087	0.559	NA	NA	NA	NA	NA	NA	NA	NA	NA	NA	NA	NA	NA	NA	NA	NA	NA	NA	NA	NA	NA	NA
chr1:201824051-201824251/+	11.111	3.121	NA	NA	NA	NA	7.336	3.268	NA	NA	NA	NA	NA	NA	NA	NA	NA	NA	NA	NA	NA	NA	NA	NA	NA	NA	NA	NA	NA	NA
chr1:201824310-201824910/+	NA	NA	NA	NA	8.571	0.17	NA	NA	NA	NA	NA	NA	NA	NA	NA	NA	NA	NA	NA	NA	NA	NA	NA	NA	NA	NA	NA	NA	NA	NA
chr1:201825062-201826223/+	NA	NA	NA	NA	NA	NA	8.571	1.025	NA	NA	NA	NA	13.684	0.935	NA	NA	NA	NA	NA	NA	NA	NA	NA	NA	NA	NA	NA	NA	NA	NA
chr1:201827681-201827982/+	NA	NA	NA	NA	NA	NA	3.693	0.407	NA	NA	NA	NA	NA	NA	NA	NA	1.826	0.045	NA	NA	NA	NA	NA	NA	NA	NA	NA	NA	NA	NA
chr1:201836087-201837775/+	NA	NA	NA	NA	NA	NA	9.91	4.807	NA	NA	NA	NA	NA	NA	NA	NA	NA	NA	NA	NA	NA	NA	NA	NA	43.689	5.732	NA	NA	NA	NA
chr1:201843500-201843959/+	NA	NA	NA	NA	NA	NA	NA	NA	NA	NA	NA	NA	NA	NA	NA	NA	NA	NA	NA	NA	NA	NA	NA	NA	48.387	4.931	NA	NA	NA	NA
chr1:201958172-201958510/+	NA	NA	NA	NA	10.769	7.074	NA	NA	NA	NA	NA	NA	NA	NA	NA	NA	NA	NA	NA	NA	NA	NA	NA	NA	NA	NA	NA	NA	NA	NA
chr1:202104654-202104834/-	NA	NA	NA	NA	2.03	1.538	NA	NA	NA	NA	NA	NA	NA	NA	NA	NA	NA	NA	NA	NA	NA	NA	NA	NA	NA	NA	NA	NA	NA	NA
chr1:202302463-202302577/-	NA	NA	NA	NA	NA	NA	NA	NA	NA	NA	NA	NA	10.563	3.138	NA	NA	NA	NA	NA	NA	NA	NA	NA	NA	NA	NA	NA	NA	NA	NA
chr1:202304186-202304773/-	NA	NA	NA	NA	NA	NA	NA	NA	NA	NA	NA	NA	2.825	2.816	NA	NA	NA	NA	NA	NA	NA	NA	NA	NA	NA	NA	NA	NA	NA	NA
chr1:202391866-202394693/+	NA	NA	NA	NA	NA	NA	13.706	3.448	NA	NA	NA	NA	NA	NA	NA	NA	NA	NA	NA	NA	NA	NA	NA	NA	NA	NA	NA	NA	NA	NA
chr1:202394853-202396167/+	NA	NA	NA	NA	NA	NA	7.778	0	NA	NA	NA	NA	NA	NA	NA	NA	NA	NA	NA	NA	NA	NA	NA	NA	NA	NA	NA	NA	NA	NA
chr1:202724580-202725485/-	NA	NA	NA	NA	1.129	0	NA	NA	NA	NA	NA	NA	NA	NA	NA	NA	NA	NA	NA	NA	NA	NA	NA	NA	NA	NA	NA	NA	NA	NA
chr1:202725644-202727518/-	NA	NA	NA	NA	1.528	0.332	NA	NA	NA	NA	NA	NA	NA	NA	NA	NA	NA	NA	NA	NA	NA	NA	NA	NA	NA	NA	NA	NA	NA	NA
chr1:202878252-202880181/-	NA	NA	NA	NA	16.224	15.646	NA	NA	NA	NA	NA	NA	NA	NA	NA	NA	NA	NA	NA	NA	NA	NA	NA	NA	NA	NA	NA	NA	NA	NA
chr1:202914297-202915566/-	NA	NA	1.003	0.718	NA	NA	NA	NA	NA	NA	NA	NA	NA	NA	NA	NA	NA	NA	NA	NA	NA	NA	NA	NA	NA	NA	NA	NA	NA	NA
chr1:202933823-202934498/-	NA	NA	32.743	6.897	NA	NA	NA	NA	NA	NA	NA	NA	NA	NA	NA	NA	NA	NA	NA	NA	NA	NA	NA	NA	NA	NA	NA	NA	NA	NA
chr1:203667482-203668587/+	NA	NA	NA	NA	NA	NA	NA	NA	NA	NA	0.947	0	NA	NA	NA	NA	NA	NA	NA	NA	NA	NA	NA	NA	NA	NA	NA	NA	NA	NA
chr1:203670051-203671171/+	NA	NA	NA	NA	NA	NA	NA	NA	NA	NA	10.106	3.671	NA	NA	NA	NA	NA	NA	NA	NA	NA	NA	NA	NA	NA	NA	NA	NA	NA	NA
chr1:203676351-203676989/+	NA	NA	NA	NA	NA	NA	NA	NA	NA	NA	NA	NA	NA	NA	NA	NA	NA	NA	NA	NA	0.485	0	NA	NA	NA	NA	NA	NA	NA	NA
chr1:203677232-203678428/+	NA	NA	NA	NA	NA	NA	NA	NA	NA	NA	0.564	0.165	NA	NA	NA	NA	NA	NA	NA	NA	NA	NA	NA	NA	NA	NA	NA	NA	NA	NA
chr1:203680236-203681087/+	NA	NA	NA	NA	NA	NA	NA	NA	NA	NA	0.189	0	NA	NA	NA	NA	NA	NA	NA	NA	NA	NA	NA	NA	NA	NA	NA	NA	NA	NA
chr1:203681267-203682292/+	NA	NA	NA	NA	NA	NA	NA	NA	NA	NA	0.72	0.166	NA	NA	NA	NA	NA	NA	NA	NA	NA	NA	NA	NA	NA	NA	NA	NA	NA	NA
chr1:204083560-204083646/+	NA	NA	NA	NA	NA	NA	NA	NA	NA	NA	NA	NA	NA	NA	NA	NA	NA	NA	NA	NA	NA	NA	NA	NA	10.638	1.282	NA	NA	NA	NA
chr1:205275435-205277292/-	15.053	2.439	NA	NA	NA	NA	NA	NA	NA	NA	NA	NA	NA	NA	NA	NA	NA	NA	NA	NA	NA	NA	NA	NA	NA	NA	NA	NA	NA	NA
chr1:206902444-206902740/+	NA	NA	NA	NA	NA	NA	NA	NA	NA	NA	NA	NA	2.525	1.023	NA	NA	NA	NA	NA	NA	NA	NA	NA	NA	NA	NA	NA	NA	NA	NA
chr1:207236061-207236487/+	NA	NA	5.069	0.826	NA	NA	4.545	0.901	NA	NA	NA	NA	NA	NA	NA	NA	NA	NA	NA	NA	NA	NA	NA	NA	NA	NA	NA	NA	NA	NA
chr1:207236554-207236691/+	NA	NA	12.658	0.733	NA	NA	NA	NA	NA	NA	NA	NA	NA	NA	NA	NA	NA	NA	NA	NA	NA	NA	NA	NA	NA	NA	NA	NA	NA	NA
chr1:207896986-207897977/+	NA	NA	NA	NA	NA	NA	46.341	37.705	NA	NA	NA	NA	NA	NA	NA	NA	NA	NA	NA	NA	NA	NA	NA	NA	NA	NA	NA	NA	NA	NA
chr1:207934791-207940357/+	NA	NA	NA	NA	NA	NA	1.746	0.348	NA	NA	NA	NA	NA	NA	NA	NA	NA	NA	NA	NA	NA	NA	NA	NA	NA	NA	NA	NA	NA	NA
chr1:209963130-209963839/-	NA	NA	NA	NA	NA	NA	NA	NA	NA	NA	NA	NA	NA	NA	1.489	0.358	NA	NA	NA	NA	NA	NA	NA	NA	NA	NA	NA	NA	NA	NA
chr1:21100103-21103089/-	NA	NA	NA	NA	NA	NA	NA	NA	NA	NA	NA	NA	NA	NA	NA	NA	NA	NA	NA	NA	NA	NA	NA	NA	69.388	40.773	NA	NA	NA	NA
chr1:21103243-21106304/-	NA	NA	NA	NA	NA	NA	NA	NA	NA	NA	NA	NA	NA	NA	NA	NA	NA	NA	NA	NA	NA	NA	NA	NA	13.208	0.68	NA	NA	NA	NA
chr1:211444651-211447551/+	NA	NA	NA	NA	3.676	1.083	10.672	4	NA	NA	NA	NA	NA	NA	NA	NA	10.569	5.882	NA	NA	NA	NA	NA	NA	NA	NA	NA	NA	NA	NA
chr1:211526799-211527751/+	NA	NA	NA	NA	NA	NA	NA	NA	NA	NA	NA	NA	NA	NA	NA	NA	NA	NA	10.204	0	NA	NA	NA	NA	NA	NA	NA	NA	NA	NA
chr1:212977771-212977937/+	NA	NA	NA	NA	NA	NA	3.833	0.632	NA	NA	NA	NA	NA	NA	NA	NA	NA	NA	NA	NA	NA	NA	NA	NA	NA	NA	NA	NA	NA	NA
chr1:213037211-213046019/+	NA	NA	NA	NA	NA	NA	NA	NA	NA	NA	NA	NA	13.636	9.554	NA	NA	NA	NA	NA	NA	NA	NA	NA	NA	NA	NA	NA	NA	NA	NA
chr1:213061936-213062487/+	NA	NA	NA	NA	NA	NA	8.966	2.083	NA	NA	NA	NA	NA	NA	NA	NA	NA	NA	NA	NA	NA	NA	NA	NA	NA	NA	NA	NA	NA	NA
chr1:21306941-21307540/-	NA	NA	0.558	0	NA	NA	NA	NA	NA	NA	NA	NA	NA	NA	NA	NA	2.465	0.38	NA	NA	NA	NA	NA	NA	NA	NA	NA	NA	NA	NA
chr1:213139120-213139612/+	NA	NA	NA	NA	NA	NA	NA	NA	NA	NA	NA	NA	NA	NA	NA	NA	38.246	10.54	NA	NA	NA	NA	NA	NA	NA	NA	NA	NA	NA	NA
chr1:213178796-213180470/-	6.832	2.961	NA	NA	NA	NA	11.95	6.047	NA	NA	NA	NA	NA	NA	NA	NA	NA	NA	NA	NA	NA	NA	NA	NA	NA	NA	NA	NA	NA	NA
chr1:21327805-21329205/-	NA	NA	NA	NA	NA	NA	NA	NA	30.233	17.073	NA	NA	25.926	15.152	NA	NA	12.121	8.434	NA	NA	27.451	4.167	NA	NA	71.429	9.091	NA	NA	NA	NA
chr1:213341316-213349742/+	23.232	0.885	NA	NA	NA	NA	4.49	0	NA	NA	NA	NA	NA	NA	NA	NA	NA	NA	NA	NA	NA	NA	NA	NA	NA	NA	NA	NA	NA	NA
chr1:21377487-21415630/-	NA	NA	0.626	0	NA	NA	NA	NA	NA	NA	NA	NA	NA	NA	NA	NA	NA	NA	NA	NA	NA	NA	NA	NA	NA	NA	NA	NA	NA	NA
chr1:21771712-21792579/+	NA	NA	NA	NA	15.942	11.628	NA	NA	NA	NA	NA	NA	NA	NA	NA	NA	NA	NA	NA	NA	NA	NA	NA	NA	NA	NA	NA	NA	NA	NA
chr1:21944465-21945517/-	NA	NA	1.511	0	NA	NA	NA	NA	NA	NA	NA	NA	NA	NA	NA	NA	NA	NA	NA	NA	NA	NA	NA	NA	NA	NA	NA	NA	NA	NA
chr1:220275946-220276028/+	NA	NA	NA	NA	2.451	0.352	NA	NA	NA	NA	NA	NA	NA	NA	NA	NA	NA	NA	NA	NA	NA	NA	NA	NA	NA	NA	NA	NA	NA	NA
chr1:22033082-22033236/-	NA	NA	NA	NA	NA	NA	6.186	1.498	NA	NA	NA	NA	NA	NA	NA	NA	NA	NA	NA	NA	NA	NA	NA	NA	NA	NA	NA	NA	NA	NA
chr1:220379348-220383729/-	NA	NA	NA	NA	NA	NA	1.972	1.408	NA	NA	NA	NA	NA	NA	NA	NA	NA	NA	NA	NA	NA	NA	NA	NA	NA	NA	NA	NA	NA	NA
chr1:220384218-220384296/-	NA	NA	NA	NA	NA	NA	3.519	1.045	NA	NA	NA	NA	NA	NA	NA	NA	NA	NA	NA	NA	NA	NA	NA	NA	NA	NA	NA	NA	NA	NA
chr1:220384344-220386228/-	NA	NA	NA	NA	NA	NA	0.967	0	NA	NA	NA	NA	NA	NA	NA	NA	NA	NA	NA	NA	NA	NA	NA	NA	NA	NA	NA	NA	NA	NA
chr1:22048257-22050390/-	NA	NA	NA	NA	NA	NA	4.428	1.146	NA	NA	NA	NA	NA	NA	NA	NA	NA	NA	NA	NA	NA	NA	NA	NA	NA	NA	NA	NA	NA	NA
chr1:22074764-22077999/-	NA	NA	NA	NA	NA	NA	4.183	0.389	NA	NA	NA	NA	NA	NA	NA	NA	NA	NA	NA	NA	NA	NA	NA	NA	NA	NA	NA	NA	NA	NA
chr1:22174333-22174450/-	NA	NA	NA	NA	NA	NA	NA	NA	NA	NA	NA	NA	NA	NA	3.1	1.003	NA	NA	NA	NA	NA	NA	NA	NA	NA	NA	NA	NA	NA	NA
chr1:222794634-222798109/+	NA	NA	NA	NA	NA	NA	NA	NA	NA	NA	NA	NA	NA	NA	NA	NA	NA	NA	NA	NA	NA	NA	NA	NA	50	3.704	NA	NA	NA	NA
chr1:223957611-223958148/+	6.536	2.111	NA	NA	NA	NA	NA	NA	NA	NA	NA	NA	NA	NA	NA	NA	NA	NA	NA	NA	NA	NA	NA	NA	NA	NA	NA	NA	NA	NA
chr1:223959627-223959882/+	1.703	0.068	NA	NA	NA	NA	NA	NA	NA	NA	NA	NA	NA	NA	NA	NA	NA	NA	NA	NA	NA	NA	NA	NA	NA	NA	NA	NA	NA	NA
chr1:224553693-224558984/+	NA	NA	3.337	0.07	NA	NA	NA	NA	NA	NA	NA	NA	NA	NA	NA	NA	NA	NA	NA	NA	NA	NA	NA	NA	NA	NA	NA	NA	NA	NA
chr1:224918276-224922264/+	NA	NA	NA	NA	5.325	2.564	NA	NA	NA	NA	NA	NA	NA	NA	NA	NA	NA	NA	NA	NA	NA	NA	NA	NA	NA	NA	NA	NA	NA	NA
chr1:225155285-225156460/+	NA	NA	NA	NA	NA	NA	NA	NA	NA	NA	NA	NA	NA	NA	NA	NA	NA	NA	NA	NA	NA	NA	NA	NA	38.462	31.148	NA	NA	NA	NA
chr1:225230816-225231445/+	NA	NA	NA	NA	NA	NA	NA	NA	NA	NA	NA	NA	NA	NA	NA	NA	NA	NA	NA	NA	NA	NA	NA	NA	64.706	16.667	NA	NA	NA	NA
chr1:225238078-225239152/+	NA	NA	NA	NA	NA	NA	63.636	5.263	NA	NA	NA	NA	NA	NA	NA	NA	NA	NA	NA	NA	NA	NA	NA	NA	NA	NA	NA	NA	NA	NA
chr1:226053667-226054273/-	NA	NA	NA	NA	NA	NA	35.354	32.143	NA	NA	NA	NA	NA	NA	NA	NA	NA	NA	NA	NA	NA	NA	NA	NA	NA	NA	NA	NA	NA	NA
chr1:226054382-226054811/-	NA	NA	NA	NA	NA	NA	35.266	25.886	NA	NA	NA	NA	NA	NA	NA	NA	NA	NA	NA	NA	NA	NA	NA	NA	NA	NA	NA	NA	NA	NA
chr1:226058813-226059686/-	NA	NA	NA	NA	NA	NA	10.345	1.385	NA	NA	NA	NA	NA	NA	NA	NA	NA	NA	NA	NA	NA	NA	NA	NA	NA	NA	NA	NA	NA	NA
chr1:227222495-227223171/-	NA	NA	NA	NA	NA	NA	4.096	0.906	NA	NA	NA	NA	NA	NA	NA	NA	NA	NA	NA	NA	NA	NA	NA	NA	NA	NA	NA	NA	NA	NA
chr1:227227937-227235627/-	NA	NA	NA	NA	NA	NA	1.905	1.724	NA	NA	NA	NA	NA	NA	NA	NA	NA	NA	NA	NA	NA	NA	NA	NA	NA	NA	NA	NA	NA	NA
chr1:22832734-22834493/+	NA	NA	NA	NA	NA	NA	18.28	1.235	NA	NA	NA	NA	NA	NA	NA	NA	NA	NA	NA	NA	NA	NA	NA	NA	NA	NA	NA	NA	NA	NA
chr1:228584748-228584843/-	41.379	11.111	NA	NA	NA	NA	NA	NA	NA	NA	NA	NA	NA	NA	NA	NA	NA	NA	NA	NA	NA	NA	NA	NA	NA	NA	NA	NA	NA	NA
chr1:229678118-229683245/-	NA	NA	8.949	0.383	NA	NA	NA	NA	NA	NA	NA	NA	NA	NA	NA	NA	NA	NA	NA	NA	NA	NA	NA	NA	NA	NA	NA	NA	NA	NA
chr1:230398751-230400986/+	3.303	0.334	NA	NA	NA	NA	NA	NA	NA	NA	NA	NA	NA	NA	NA	NA	NA	NA	NA	NA	NA	NA	NA	NA	NA	NA	NA	NA	NA	NA
chr1:2316504-2317245/-	NA	NA	NA	NA	NA	NA	NA	NA	NA	NA	NA	NA	41.935	9.091	NA	NA	NA	NA	NA	NA	NA	NA	NA	NA	NA	NA	NA	NA	NA	NA
chr1:2318968-2319677/-	NA	NA	NA	NA	NA	NA	NA	NA	NA	NA	NA	NA	33.333	5.263	NA	NA	NA	NA	NA	NA	NA	NA	NA	NA	NA	NA	NA	NA	NA	NA
chr1:232596907-232600585/-	NA	NA	NA	NA	NA	NA	NA	NA	NA	NA	NA	NA	NA	NA	NA	NA	NA	NA	25.263	3.966	NA	NA	NA	NA	41.304	4.268	NA	NA	NA	NA
chr1:2327310-2328554/+	NA	NA	NA	NA	NA	NA	2.658	0.334	NA	NA	NA	NA	NA	NA	NA	NA	NA	NA	NA	NA	NA	NA	NA	NA	NA	NA	NA	NA	NA	NA
chr1:233193036-233225806/-	NA	NA	NA	NA	48.837	14.286	NA	NA	NA	NA	NA	NA	NA	NA	NA	NA	NA	NA	NA	NA	NA	NA	NA	NA	NA	NA	NA	NA	NA	NA
chr1:233296179-233297016/-	NA	NA	NA	NA	NA	NA	NA	NA	NA	NA	NA	NA	NA	NA	NA	NA	NA	NA	4.065	1.031	NA	NA	NA	NA	NA	NA	NA	NA	NA	NA
chr1:233336010-233344263/-	NA	NA	NA	NA	7.273	0	NA	NA	NA	NA	NA	NA	NA	NA	NA	NA	NA	NA	NA	NA	NA	NA	NA	NA	NA	NA	NA	NA	NA	NA
chr1:233353677-233353776/-	20.612	7.143	22.642	11.34	18.492	12.658	NA	NA	NA	NA	21.893	6.024	17.045	4.762	NA	NA	NA	NA	18.75	6.977	NA	NA	NA	NA	18.182	3.571	9.836	1.754	20	3.571
chr1:233363117-233372590/-	6.796	0	NA	NA	NA	NA	NA	NA	NA	NA	NA	NA	NA	NA	10.769	1.333	NA	NA	NA	NA	NA	NA	NA	NA	NA	NA	NA	NA	NA	NA
chr1:233372726-233386484/-	NA	NA	NA	NA	NA	NA	NA	NA	NA	NA	NA	NA	NA	NA	NA	NA	NA	NA	NA	NA	NA	NA	NA	NA	37.931	25.714	NA	NA	NA	NA
chr1:233386578-233388099/-	NA	NA	NA	NA	NA	NA	NA	NA	NA	NA	NA	NA	NA	NA	NA	NA	NA	NA	NA	NA	NA	NA	NA	NA	41.538	0	NA	NA	NA	NA
chr1:23357127-23370919/+	NA	NA	NA	NA	NA	NA	12.258	0	NA	NA	NA	NA	16.667	1.931	NA	NA	NA	NA	NA	NA	NA	NA	NA	NA	44	0	NA	NA	NA	NA
chr1:23380332-23381561/+	NA	NA	NA	NA	NA	NA	NA	NA	NA	NA	NA	NA	NA	NA	NA	NA	NA	NA	NA	NA	NA	NA	NA	NA	16.667	1.361	NA	NA	NA	NA
chr1:23381654-23382424/+	NA	NA	NA	NA	NA	NA	NA	NA	NA	NA	NA	NA	NA	NA	NA	NA	NA	NA	NA	NA	NA	NA	NA	NA	12.963	0.223	NA	NA	NA	NA
chr1:23382531-23383976/+	NA	NA	NA	NA	NA	NA	NA	NA	NA	NA	NA	NA	NA	NA	NA	NA	NA	NA	NA	NA	NA	NA	NA	NA	12.977	1.418	NA	NA	NA	NA
chr1:235599155-235599700/+	NA	NA	NA	NA	NA	NA	NA	NA	NA	NA	NA	NA	NA	NA	NA	NA	NA	NA	NA	NA	6.41	5.797	NA	NA	NA	NA	NA	NA	NA	NA
chr1:235599765-235599858/+	NA	NA	NA	NA	NA	NA	7.424	2.164	NA	NA	NA	NA	NA	NA	NA	NA	NA	NA	NA	NA	NA	NA	NA	NA	NA	NA	NA	NA	NA	NA
chr1:235652573-235657990/-	NA	NA	7.95	3.889	NA	NA	NA	NA	NA	NA	NA	NA	NA	NA	NA	NA	NA	NA	NA	NA	NA	NA	NA	NA	NA	NA	NA	NA	NA	NA
chr1:23664354-23664982/-	NA	NA	NA	NA	NA	NA	1.071	0.355	NA	NA	NA	NA	NA	NA	NA	NA	NA	NA	NA	NA	NA	NA	NA	NA	NA	NA	NA	NA	NA	NA
chr1:236969533-236972003/+	32.016	13.559	NA	NA	32.489	16.049	NA	NA	NA	NA	NA	NA	NA	NA	NA	NA	NA	NA	NA	NA	NA	NA	NA	NA	NA	NA	NA	NA	NA	NA
chr1:236976144-236978903/+	NA	NA	NA	NA	NA	NA	4.762	0.629	NA	NA	NA	NA	NA	NA	NA	NA	NA	NA	NA	NA	NA	NA	NA	NA	NA	NA	NA	NA	NA	NA
chr1:236979843-236987418/+	NA	NA	NA	NA	NA	NA	NA	NA	NA	NA	NA	NA	NA	NA	NA	NA	NA	NA	NA	NA	NA	NA	NA	NA	25.926	0	NA	NA	NA	NA
chr1:236992568-236995265/+	NA	NA	NA	NA	NA	NA	NA	NA	NA	NA	NA	NA	NA	NA	NA	NA	NA	NA	NA	NA	NA	NA	NA	NA	18.31	3.03	NA	NA	NA	NA
chr1:24098656-24098757/-	NA	NA	NA	NA	NA	NA	NA	NA	50	11.765	NA	NA	NA	NA	NA	NA	NA	NA	NA	NA	NA	NA	NA	NA	NA	NA	NA	NA	NA	NA
chr1:243319757-243327585/-	NA	NA	NA	NA	NA	NA	NA	NA	NA	NA	NA	NA	NA	NA	NA	NA	NA	NA	NA	NA	NA	NA	NA	NA	36.17	1.55	NA	NA	NA	NA
chr1:243468079-243471290/+	NA	NA	NA	NA	21.739	12.676	NA	NA	NA	NA	NA	NA	NA	NA	NA	NA	NA	NA	NA	NA	NA	NA	NA	NA	NA	NA	NA	NA	NA	NA
chr1:243471479-243480056/+	NA	NA	NA	NA	34.831	4.615	19.424	4.762	NA	NA	NA	NA	NA	NA	NA	NA	NA	NA	NA	NA	50.495	16.667	NA	NA	NA	NA	NA	NA	NA	NA
chr1:244579380-244580929/-	NA	NA	NA	NA	NA	NA	2.287	0.093	NA	NA	NA	NA	NA	NA	NA	NA	NA	NA	NA	NA	NA	NA	NA	NA	NA	NA	NA	NA	NA	NA
chr1:244581054-244582061/-	NA	NA	NA	NA	NA	NA	1.931	0.129	NA	NA	NA	NA	NA	NA	NA	NA	NA	NA	NA	NA	NA	NA	NA	NA	NA	NA	NA	NA	NA	NA
chr1:244582216-244583471/-	NA	NA	NA	NA	NA	NA	6.533	2.143	NA	NA	NA	NA	NA	NA	NA	NA	NA	NA	NA	NA	NA	NA	NA	NA	NA	NA	NA	NA	NA	NA
chr1:246021972-246027100/-	NA	NA	NA	NA	NA	NA	2.166	0.103	NA	NA	NA	NA	NA	NA	NA	NA	NA	NA	NA	NA	NA	NA	NA	NA	NA	NA	NA	NA	NA	NA
chr1:246091335-246093171/-	1.786	0	0.969	0	1.899	0.984	1.768	0.271	NA	NA	NA	NA	NA	NA	NA	NA	NA	NA	NA	NA	NA	NA	NA	NA	NA	NA	NA	NA	NA	NA
chr1:247030653-247030962/-	8	1.02	NA	NA	NA	NA	NA	NA	NA	NA	NA	NA	NA	NA	6.024	0.565	NA	NA	NA	NA	NA	NA	NA	NA	NA	NA	NA	NA	NA	NA
chr1:247040383-247040459/-	3.858	0	NA	NA	NA	NA	NA	NA	NA	NA	NA	NA	NA	NA	NA	NA	NA	NA	NA	NA	NA	NA	NA	NA	NA	NA	NA	NA	NA	NA
chr1:247050659-247051478/-	NA	NA	NA	NA	NA	NA	1.707	0.605	NA	NA	NA	NA	NA	NA	NA	NA	NA	NA	NA	NA	NA	NA	NA	NA	NA	NA	NA	NA	NA	NA
chr1:247471890-247473000/-	7.5	3.488	NA	NA	7.232	3.662	NA	NA	NA	NA	NA	NA	NA	NA	NA	NA	NA	NA	NA	NA	NA	NA	NA	NA	NA	NA	NA	NA	NA	NA
chr1:247473108-247473625/-	NA	NA	3.806	0.33	NA	NA	NA	NA	NA	NA	NA	NA	13.6	5.983	NA	NA	NA	NA	NA	NA	NA	NA	NA	NA	NA	NA	NA	NA	NA	NA
chr1:26584221-26584633/+	NA	NA	NA	NA	NA	NA	NA	NA	10.078	2.564	NA	NA	NA	NA	NA	NA	NA	NA	NA	NA	NA	NA	NA	NA	NA	NA	NA	NA	NA	NA
chr1:26873474-26873679/+	NA	NA	NA	NA	NA	NA	NA	NA	NA	NA	NA	NA	NA	NA	3.333	0.179	NA	NA	NA	NA	NA	NA	NA	NA	NA	NA	NA	NA	NA	NA
chr1:27269267-27269361/+	NA	NA	7.182	3.371	NA	NA	NA	NA	NA	NA	NA	NA	NA	NA	NA	NA	10.909	2.988	NA	NA	NA	NA	NA	NA	NA	NA	NA	NA	NA	NA
chr1:27657628-27658560/+	NA	NA	23.457	8.696	NA	NA	NA	NA	NA	NA	NA	NA	NA	NA	NA	NA	NA	NA	NA	NA	NA	NA	NA	NA	NA	NA	NA	NA	NA	NA
chr1:27660545-27660641/+	NA	NA	NA	NA	NA	NA	NA	NA	NA	NA	0.677	0.163	NA	NA	NA	NA	NA	NA	NA	NA	NA	NA	NA	NA	NA	NA	NA	NA	NA	NA
chr1:28116142-28120043/+	NA	NA	NA	NA	NA	NA	NA	NA	NA	NA	10.769	0.766	NA	NA	NA	NA	NA	NA	NA	NA	20.137	0.499	NA	NA	NA	NA	NA	NA	NA	NA
chr1:28233552-28233691/-	NA	NA	NA	NA	NA	NA	2.252	0.046	NA	NA	NA	NA	NA	NA	NA	NA	NA	NA	NA	NA	NA	NA	NA	NA	NA	NA	NA	NA	NA	NA
chr1:28323889-28324794/-	NA	NA	NA	NA	NA	NA	19.101	3.896	NA	NA	NA	NA	NA	NA	NA	NA	NA	NA	NA	NA	NA	NA	NA	NA	NA	NA	NA	NA	NA	NA
chr1:28365416-28369081/-	NA	NA	NA	NA	NA	NA	1.541	0.193	NA	NA	NA	NA	NA	NA	NA	NA	NA	NA	NA	NA	NA	NA	NA	NA	NA	NA	NA	NA	NA	NA
chr1:28598382-28598794/+	NA	NA	NA	NA	NA	NA	NA	NA	NA	NA	8.296	3.39	NA	NA	NA	NA	NA	NA	NA	NA	NA	NA	NA	NA	NA	NA	NA	NA	NA	NA
chr1:28598977-28599091/+	NA	NA	2.335	0	NA	NA	NA	NA	NA	NA	NA	NA	NA	NA	NA	NA	NA	NA	NA	NA	NA	NA	NA	NA	NA	NA	NA	NA	NA	NA
chr1:28600669-28601335/+	NA	NA	7.83	3.306	NA	NA	NA	NA	NA	NA	NA	NA	NA	NA	NA	NA	NA	NA	NA	NA	NA	NA	NA	NA	NA	NA	NA	NA	NA	NA
chr1:29487029-29492401/-	NA	NA	NA	NA	NA	NA	62.682	22.449	NA	NA	NA	NA	NA	NA	NA	NA	NA	NA	NA	NA	NA	NA	NA	NA	NA	NA	NA	NA	NA	NA
chr1:31418330-31422973/-	NA	NA	NA	NA	NA	NA	30.824	14.286	NA	NA	NA	NA	NA	NA	NA	NA	15.789	2.602	NA	NA	NA	NA	NA	NA	NA	NA	NA	NA	NA	NA
chr1:31437757-31438828/-	NA	NA	NA	NA	NA	NA	3.768	1.563	NA	NA	NA	NA	NA	NA	NA	NA	NA	NA	NA	NA	NA	NA	NA	NA	NA	NA	NA	NA	NA	NA
chr1:31439125-31440013/-	NA	NA	NA	NA	NA	NA	13.99	6.806	NA	NA	NA	NA	NA	NA	NA	NA	NA	NA	NA	NA	NA	NA	NA	NA	NA	NA	NA	NA	NA	NA
chr1:31440157-31441200/-	NA	NA	NA	NA	NA	NA	6.005	1.449	NA	NA	NA	NA	NA	NA	NA	NA	NA	NA	NA	NA	NA	NA	NA	NA	NA	NA	NA	NA	NA	NA
chr1:31447649-31452908/-	NA	NA	1.665	0.256	NA	NA	NA	NA	NA	NA	NA	NA	NA	NA	NA	NA	NA	NA	NA	NA	NA	NA	NA	NA	NA	NA	NA	NA	NA	NA
chr1:31453025-31454158/-	NA	NA	NA	NA	NA	NA	NA	NA	NA	NA	NA	NA	NA	NA	NA	NA	15.961	4.564	NA	NA	NA	NA	NA	NA	NA	NA	NA	NA	NA	NA
chr1:31465507-31467900/-	NA	NA	NA	NA	7.591	0.806	2.664	0.654	NA	NA	NA	NA	NA	NA	NA	NA	NA	NA	NA	NA	NA	NA	NA	NA	NA	NA	NA	NA	NA	NA
chr1:31468067-31478699/-	NA	NA	NA	NA	NA	NA	4.038	1.845	NA	NA	NA	NA	NA	NA	NA	NA	NA	NA	NA	NA	NA	NA	NA	NA	NA	NA	NA	NA	NA	NA
chr1:31478878-31479840/-	NA	NA	NA	NA	NA	NA	NA	NA	NA	NA	NA	NA	NA	NA	NA	NA	NA	NA	NA	NA	NA	NA	NA	NA	22.581	0.588	NA	NA	NA	NA
chr1:31764853-31766065/-	NA	NA	NA	NA	NA	NA	1.358	0.452	NA	NA	NA	NA	NA	NA	NA	NA	NA	NA	NA	NA	NA	NA	NA	NA	NA	NA	NA	NA	NA	NA
chr1:31898256-31898622/+	NA	NA	NA	NA	NA	NA	NA	NA	NA	NA	NA	NA	NA	NA	2.119	0.571	NA	NA	NA	NA	NA	NA	NA	NA	NA	NA	NA	NA	NA	NA
chr1:31898760-31899500/+	NA	NA	1.76	0	NA	NA	NA	NA	1.451	0.656	NA	NA	NA	NA	NA	NA	NA	NA	NA	NA	NA	NA	NA	NA	NA	NA	NA	NA	NA	NA
chr1:31899670-31901824/+	NA	NA	1.11	0	NA	NA	NA	NA	NA	NA	NA	NA	NA	NA	NA	NA	NA	NA	NA	NA	NA	NA	NA	NA	NA	NA	NA	NA	NA	NA
chr1:31901915-31902243/+	NA	NA	NA	NA	NA	NA	NA	NA	NA	NA	NA	NA	NA	NA	0.56	0.136	NA	NA	NA	NA	NA	NA	NA	NA	NA	NA	NA	NA	NA	NA
chr1:32375713-32377296/-	NA	NA	NA	NA	NA	NA	0.9	0.195	NA	NA	NA	NA	NA	NA	NA	NA	NA	NA	NA	NA	NA	NA	NA	NA	NA	NA	NA	NA	NA	NA
chr1:32503720-32504152/+	NA	NA	NA	NA	NA	NA	56.863	56.25	NA	NA	NA	NA	NA	NA	NA	NA	NA	NA	NA	NA	NA	NA	NA	NA	NA	NA	NA	NA	NA	NA
chr1:32627647-32627961/+	NA	NA	1.186	0.982	NA	NA	NA	NA	NA	NA	NA	NA	NA	NA	NA	NA	NA	NA	NA	NA	NA	NA	NA	NA	NA	NA	NA	NA	NA	NA
chr1:32691921-32692003/+	NA	NA	1.155	0.334	NA	NA	NA	NA	NA	NA	NA	NA	NA	NA	NA	NA	NA	NA	NA	NA	NA	NA	NA	NA	NA	NA	NA	NA	NA	NA
chr1:32694210-32694327/+	NA	NA	1.071	0.032	NA	NA	NA	NA	NA	NA	0.674	0.02	NA	NA	NA	NA	NA	NA	NA	NA	NA	NA	NA	NA	NA	NA	NA	NA	NA	NA
chr1:32694417-32694735/+	0.553	0.341	NA	NA	NA	NA	NA	NA	NA	NA	NA	NA	NA	NA	NA	NA	NA	NA	NA	NA	NA	NA	NA	NA	NA	NA	NA	NA	NA	NA
chr1:32745595-32745679/+	NA	NA	NA	NA	NA	NA	NA	NA	NA	NA	NA	NA	NA	NA	NA	NA	3.178	0.183	NA	NA	NA	NA	NA	NA	NA	NA	NA	NA	NA	NA
chr1:32849649-32852379/-	NA	NA	NA	NA	NA	NA	NA	NA	NA	NA	NA	NA	NA	NA	NA	NA	48.387	28.889	NA	NA	NA	NA	NA	NA	NA	NA	NA	NA	NA	NA
chr1:33133999-33134339/+	NA	NA	NA	NA	NA	NA	NA	NA	NA	NA	NA	NA	NA	NA	2.906	1.42	NA	NA	NA	NA	NA	NA	NA	NA	NA	NA	NA	NA	NA	NA
chr1:33134733-33134831/+	NA	NA	NA	NA	NA	NA	NA	NA	NA	NA	NA	NA	NA	NA	NA	NA	NA	NA	NA	NA	NA	NA	NA	NA	6.011	0.084	NA	NA	NA	NA
chr1:33138300-33138391/+	NA	NA	5.35	0.352	NA	NA	NA	NA	NA	NA	NA	NA	NA	NA	NA	NA	NA	NA	NA	NA	NA	NA	NA	NA	NA	NA	NA	NA	NA	NA
chr1:33291030-33291698/+	NA	NA	NA	NA	NA	NA	8.123	1.639	NA	NA	NA	NA	NA	NA	NA	NA	NA	NA	NA	NA	NA	NA	NA	NA	NA	NA	NA	NA	NA	NA
chr1:33295668-33318679/+	NA	NA	NA	NA	NA	NA	9.506	4.167	NA	NA	3.763	2.204	NA	NA	NA	NA	NA	NA	NA	NA	NA	NA	NA	NA	NA	NA	NA	NA	NA	NA
chr1:33760616-33760747/+	NA	NA	NA	NA	1.592	0.252	NA	NA	NA	NA	NA	NA	NA	NA	NA	NA	NA	NA	NA	NA	NA	NA	NA	NA	NA	NA	NA	NA	NA	NA
chr1:35478182-35480297/-	NA	NA	NA	NA	NA	NA	17.347	12.548	NA	NA	NA	NA	NA	NA	NA	NA	NA	NA	NA	NA	NA	NA	NA	NA	NA	NA	NA	NA	NA	NA
chr1:35563167-35569895/+	NA	NA	NA	NA	NA	NA	NA	NA	NA	NA	19.403	16.667	NA	NA	NA	NA	NA	NA	NA	NA	NA	NA	NA	NA	NA	NA	NA	NA	NA	NA
chr1:35826856-35827219/+	NA	NA	NA	NA	NA	NA	3.289	0.377	NA	NA	NA	NA	NA	NA	NA	NA	NA	NA	NA	NA	NA	NA	NA	NA	13.636	1	NA	NA	NA	NA
chr1:35827390-35835629/+	NA	NA	NA	NA	NA	NA	NA	NA	NA	NA	NA	NA	NA	NA	NA	NA	NA	NA	NA	NA	NA	NA	NA	NA	36.538	3.604	NA	NA	NA	NA
chr1:35847034-35847146/+	NA	NA	NA	NA	NA	NA	NA	NA	NA	NA	NA	NA	NA	NA	2.991	0.213	NA	NA	NA	NA	NA	NA	NA	NA	NA	NA	NA	NA	NA	NA
chr1:35853205-35854510/+	NA	NA	NA	NA	NA	NA	4.688	2.622	NA	NA	NA	NA	NA	NA	20	3.965	NA	NA	NA	NA	NA	NA	NA	NA	NA	NA	NA	NA	NA	NA
chr1:35926038-35928221/-	NA	NA	12.195	3.226	NA	NA	NA	NA	NA	NA	NA	NA	NA	NA	NA	NA	NA	NA	NA	NA	NA	NA	NA	NA	NA	NA	NA	NA	NA	NA
chr1:35928314-35932208/-	NA	NA	8.761	2.273	NA	NA	NA	NA	NA	NA	NA	NA	NA	NA	NA	NA	NA	NA	NA	NA	NA	NA	NA	NA	NA	NA	NA	NA	NA	NA
chr1:36354211-36358157/+	NA	NA	NA	NA	NA	NA	14.05	2.97	NA	NA	NA	NA	NA	NA	NA	NA	NA	NA	NA	NA	NA	NA	NA	NA	NA	NA	NA	NA	NA	NA
chr1:36470076-36474290/+	NA	NA	NA	NA	6.731	0	15.909	2.439	NA	NA	NA	NA	NA	NA	NA	NA	NA	NA	NA	NA	NA	NA	NA	NA	NA	NA	NA	NA	NA	NA
chr1:36474378-36474497/+	NA	NA	NA	NA	12.343	0	6.341	1.449	NA	NA	NA	NA	NA	NA	NA	NA	NA	NA	NA	NA	NA	NA	NA	NA	NA	NA	NA	NA	NA	NA
chr1:36505585-36505907/+	NA	NA	NA	NA	6.227	1.961	NA	NA	NA	NA	NA	NA	NA	NA	NA	NA	NA	NA	NA	NA	NA	NA	NA	NA	NA	NA	NA	NA	NA	NA
chr1:3659475-3659624/-	NA	NA	NA	NA	NA	NA	NA	NA	38.298	37.736	NA	NA	NA	NA	NA	NA	NA	NA	NA	NA	NA	NA	NA	NA	NA	NA	NA	NA	NA	NA
chr1:3659521-3659624/-	NA	NA	NA	NA	NA	NA	NA	NA	NA	NA	NA	NA	NA	NA	NA	NA	22.5	5.185	NA	NA	NA	NA	NA	NA	NA	NA	NA	NA	NA	NA
chr1:36759536-36762183/+	NA	NA	NA	NA	NA	NA	12.635	3.279	NA	NA	NA	NA	NA	NA	NA	NA	NA	NA	NA	NA	NA	NA	NA	NA	NA	NA	NA	NA	NA	NA
chr1:36773564-36773709/+	NA	NA	72.581	14.286	NA	NA	NA	NA	NA	NA	NA	NA	NA	NA	NA	NA	NA	NA	NA	NA	NA	NA	NA	NA	NA	NA	NA	NA	NA	NA
chr1:3753256-3753855/-	NA	NA	NA	NA	NA	NA	16	4.478	NA	NA	NA	NA	NA	NA	NA	NA	NA	NA	NA	NA	NA	NA	NA	NA	NA	NA	NA	NA	NA	NA
chr1:38040057-38040265/-	5.473	2.466	NA	NA	NA	NA	NA	NA	NA	NA	NA	NA	NA	NA	NA	NA	NA	NA	NA	NA	NA	NA	NA	NA	NA	NA	NA	NA	NA	NA
chr1:38041300-38042028/-	5.556	0.982	NA	NA	NA	NA	NA	NA	NA	NA	NA	NA	NA	NA	NA	NA	NA	NA	NA	NA	NA	NA	NA	NA	NA	NA	NA	NA	NA	NA
chr1:38048537-38049467/-	NA	NA	NA	NA	NA	NA	NA	NA	NA	NA	NA	NA	NA	NA	NA	NA	NA	NA	NA	NA	5.714	5.512	NA	NA	NA	NA	NA	NA	NA	NA
chr1:38442625-38444391/-	NA	NA	NA	NA	NA	NA	NA	NA	NA	NA	NA	NA	NA	NA	NA	NA	6.41	0.952	NA	NA	NA	NA	NA	NA	NA	NA	NA	NA	NA	NA
chr1:38444499-38444659/-	NA	NA	NA	NA	NA	NA	NA	NA	NA	NA	NA	NA	NA	NA	NA	NA	4.225	0.457	NA	NA	NA	NA	NA	NA	NA	NA	NA	NA	NA	NA
chr1:38444727-38445136/-	NA	NA	NA	NA	NA	NA	NA	NA	NA	NA	NA	NA	NA	NA	NA	NA	3.178	1.294	NA	NA	NA	NA	NA	NA	NA	NA	NA	NA	NA	NA
chr1:38449932-38450378/-	NA	NA	NA	NA	NA	NA	NA	NA	NA	NA	10.606	1.13	NA	NA	NA	NA	NA	NA	NA	NA	NA	NA	NA	NA	NA	NA	NA	NA	NA	NA
chr1:39748046-39748860/+	NA	NA	NA	NA	NA	NA	1.574	1.099	NA	NA	2.564	0.253	NA	NA	NA	NA	NA	NA	NA	NA	NA	NA	NA	NA	NA	NA	NA	NA	NA	NA
chr1:39748973-39749080/+	NA	NA	NA	NA	NA	NA	NA	NA	NA	NA	1.317	0	NA	NA	NA	NA	NA	NA	NA	NA	NA	NA	NA	NA	NA	NA	NA	NA	NA	NA
chr1:39749187-39749737/+	NA	NA	NA	NA	NA	NA	5.505	2.165	NA	NA	3.065	0.599	NA	NA	NA	NA	5.59	0	NA	NA	NA	NA	NA	NA	NA	NA	NA	NA	NA	NA
chr1:39751062-39751275/+	NA	NA	NA	NA	NA	NA	NA	NA	NA	NA	6.864	1.923	NA	NA	NA	NA	NA	NA	NA	NA	NA	NA	NA	NA	NA	NA	NA	NA	NA	NA
chr1:39894998-39895498/+	NA	NA	NA	NA	NA	NA	NA	NA	NA	NA	15.663	0	NA	NA	NA	NA	NA	NA	NA	NA	NA	NA	NA	NA	NA	NA	NA	NA	NA	NA
chr1:39895740-39896373/+	NA	NA	NA	NA	NA	NA	NA	NA	NA	NA	2.069	0.287	NA	NA	NA	NA	NA	NA	NA	NA	NA	NA	NA	NA	NA	NA	NA	NA	NA	NA
chr1:39907992-39908083/+	NA	NA	NA	NA	NA	NA	NA	NA	NA	NA	NA	NA	NA	NA	NA	NA	NA	NA	12.583	1.211	NA	NA	NA	NA	NA	NA	NA	NA	NA	NA
chr1:39924162-39924757/+	NA	NA	NA	NA	5.282	3.409	NA	NA	NA	NA	NA	NA	NA	NA	NA	NA	NA	NA	4.639	3.297	NA	NA	NA	NA	NA	NA	NA	NA	NA	NA
chr1:39929358-39930766/+	NA	NA	36.842	12.329	NA	NA	NA	NA	NA	NA	NA	NA	NA	NA	NA	NA	NA	NA	NA	NA	NA	NA	NA	NA	NA	NA	NA	NA	NA	NA
chr1:40030214-40030357/-	NA	NA	NA	NA	NA	NA	7.821	3.96	NA	NA	NA	NA	NA	NA	NA	NA	NA	NA	NA	NA	NA	NA	NA	NA	NA	NA	NA	NA	NA	NA
chr1:40030445-40030777/-	NA	NA	NA	NA	NA	NA	4.513	0.607	NA	NA	NA	NA	NA	NA	NA	NA	NA	NA	NA	NA	NA	NA	NA	NA	NA	NA	NA	NA	NA	NA
chr1:40315933-40318402/-	NA	NA	NA	NA	NA	NA	13.333	2.492	NA	NA	NA	NA	NA	NA	NA	NA	NA	NA	NA	NA	NA	NA	NA	NA	NA	NA	NA	NA	NA	NA
chr1:40318548-40319641/-	NA	NA	NA	NA	NA	NA	18.333	7.581	NA	NA	NA	NA	NA	NA	NA	NA	NA	NA	NA	NA	NA	NA	NA	NA	NA	NA	NA	NA	NA	NA
chr1:40530042-40530145/+	NA	NA	NA	NA	1.65	0	NA	NA	NA	NA	NA	NA	NA	NA	NA	NA	NA	NA	NA	NA	NA	NA	NA	NA	NA	NA	NA	NA	NA	NA
chr1:40661436-40668083/+	NA	NA	NA	NA	NA	NA	4.889	0	NA	NA	NA	NA	NA	NA	NA	NA	NA	NA	NA	NA	NA	NA	NA	NA	NA	NA	NA	NA	NA	NA
chr1:40882013-40882451/+	NA	NA	NA	NA	NA	NA	7.282	0.563	NA	NA	NA	NA	NA	NA	NA	NA	NA	NA	NA	NA	NA	NA	NA	NA	NA	NA	NA	NA	NA	NA
chr1:41218918-41223792/+	NA	NA	NA	NA	10.564	0.437	NA	NA	NA	NA	NA	NA	NA	NA	NA	NA	NA	NA	NA	NA	NA	NA	NA	NA	NA	NA	NA	NA	NA	NA
chr1:41461740-41463065/+	13.896	1.359	NA	NA	NA	NA	NA	NA	NA	NA	NA	NA	NA	NA	NA	NA	NA	NA	NA	NA	NA	NA	NA	NA	27.273	4.564	NA	NA	NA	NA
chr1:41463198-41466700/+	4.88	1.925	NA	NA	NA	NA	NA	NA	NA	NA	NA	NA	NA	NA	NA	NA	NA	NA	NA	NA	NA	NA	NA	NA	NA	NA	NA	NA	NA	NA
chr1:41503213-41512078/-	NA	NA	15.96	5.66	NA	NA	NA	NA	NA	NA	NA	NA	NA	NA	NA	NA	NA	NA	NA	NA	NA	NA	NA	NA	NA	NA	NA	NA	NA	NA
chr1:41579198-41582593/-	NA	NA	NA	NA	12.048	1.245	NA	NA	NA	NA	NA	NA	NA	NA	NA	NA	NA	NA	NA	NA	NA	NA	NA	NA	NA	NA	NA	NA	NA	NA
chr1:41627104-41651792/-	NA	NA	NA	NA	NA	NA	29.825	5.97	NA	NA	NA	NA	NA	NA	NA	NA	NA	NA	NA	NA	NA	NA	NA	NA	NA	NA	NA	NA	NA	NA
chr1:42654599-42654973/-	NA	NA	3.226	2.295	NA	NA	7.547	4.516	NA	NA	NA	NA	NA	NA	NA	NA	NA	NA	NA	NA	NA	NA	NA	NA	NA	NA	NA	NA	NA	NA
chr1:42744343-42776720/-	NA	NA	NA	NA	NA	NA	NA	NA	NA	NA	NA	NA	NA	NA	9.402	6.25	NA	NA	NA	NA	NA	NA	NA	NA	NA	NA	NA	NA	NA	NA
chr1:43225061-43227993/-	NA	NA	1.263	0.885	NA	NA	NA	NA	NA	NA	NA	NA	NA	NA	NA	NA	NA	NA	NA	NA	NA	NA	NA	NA	NA	NA	NA	NA	NA	NA
chr1:43396537-43396716/-	NA	NA	NA	NA	NA	NA	NA	NA	NA	NA	NA	NA	3.43	1.563	NA	NA	NA	NA	NA	NA	NA	NA	NA	NA	NA	NA	NA	NA	NA	NA
chr1:43779639-43782869/+	NA	NA	NA	NA	NA	NA	NA	NA	NA	NA	NA	NA	NA	NA	NA	NA	NA	NA	NA	NA	16.398	5.12	NA	NA	NA	NA	NA	NA	NA	NA
chr1:43785019-43785129/+	NA	NA	NA	NA	NA	NA	NA	NA	NA	NA	NA	NA	NA	NA	NA	NA	NA	NA	NA	NA	2.038	1.225	NA	NA	NA	NA	NA	NA	NA	NA
chr1:44071114-44071199/+	NA	NA	NA	NA	NA	NA	NA	NA	NA	NA	NA	NA	NA	NA	3.183	1.178	NA	NA	NA	NA	NA	NA	NA	NA	NA	NA	NA	NA	NA	NA
chr1:44085244-44085350/+	NA	NA	NA	NA	NA	NA	NA	NA	NA	NA	NA	NA	NA	NA	NA	NA	NA	NA	NA	NA	0.78	0.065	NA	NA	NA	NA	NA	NA	NA	NA
chr1:44085529-44085765/+	NA	NA	NA	NA	NA	NA	NA	NA	NA	NA	NA	NA	NA	NA	NA	NA	NA	NA	NA	NA	3.642	0.521	NA	NA	NA	NA	NA	NA	NA	NA
chr1:44085892-44086124/+	NA	NA	NA	NA	NA	NA	NA	NA	NA	NA	NA	NA	NA	NA	NA	NA	NA	NA	NA	NA	0.791	0.299	NA	NA	NA	NA	NA	NA	NA	NA
chr1:44364935-44365180/+	NA	NA	NA	NA	81.818	52.381	NA	NA	NA	NA	NA	NA	NA	NA	NA	NA	NA	NA	NA	NA	NA	NA	NA	NA	NA	NA	NA	NA	NA	NA
chr1:44441520-44441761/+	NA	NA	NA	NA	NA	NA	NA	NA	NA	NA	NA	NA	14.286	6.464	NA	NA	NA	NA	NA	NA	NA	NA	NA	NA	NA	NA	NA	NA	NA	NA
chr1:44468318-44468524/-	NA	NA	NA	NA	NA	NA	NA	NA	5.226	0.719	NA	NA	NA	NA	NA	NA	NA	NA	NA	NA	NA	NA	NA	NA	NA	NA	NA	NA	NA	NA
chr1:45223318-45223579/+	6.579	0.515	NA	NA	NA	NA	NA	NA	8.547	0.965	NA	NA	NA	NA	NA	NA	NA	NA	NA	NA	NA	NA	NA	NA	NA	NA	NA	NA	NA	NA
chr1:45223643-45223720/+	3.401	0	NA	NA	NA	NA	NA	NA	NA	NA	NA	NA	NA	NA	NA	NA	NA	NA	NA	NA	NA	NA	NA	NA	NA	NA	NA	NA	NA	NA
chr1:45392411-45407177/-	NA	NA	NA	NA	NA	NA	0.651	0.17	NA	NA	NA	NA	NA	NA	NA	NA	NA	NA	NA	NA	NA	NA	NA	NA	NA	NA	NA	NA	NA	NA
chr1:45480508-45480611/+	NA	NA	4.817	0.794	NA	NA	NA	NA	NA	NA	NA	NA	NA	NA	NA	NA	NA	NA	NA	NA	NA	NA	NA	NA	NA	NA	NA	NA	NA	NA
chr1:45797006-45797091/-	NA	NA	NA	NA	16.667	6.748	NA	NA	NA	NA	NA	NA	NA	NA	NA	NA	NA	NA	NA	NA	NA	NA	NA	NA	NA	NA	NA	NA	NA	NA
chr1:45797521-45797694/-	NA	NA	NA	NA	40	16.981	NA	NA	NA	NA	NA	NA	NA	NA	NA	NA	34.694	11.447	NA	NA	NA	NA	NA	NA	NA	NA	NA	NA	NA	NA
chr1:45797758-45797837/-	NA	NA	NA	NA	38.889	3.158	NA	NA	NA	NA	NA	NA	NA	NA	NA	NA	28.571	2.834	NA	NA	NA	NA	NA	NA	NA	NA	NA	NA	NA	NA
chr1:45797982-45798062/-	NA	NA	NA	NA	68.421	8.511	NA	NA	NA	NA	NA	NA	NA	NA	NA	NA	NA	NA	NA	NA	NA	NA	NA	NA	NA	NA	NA	NA	NA	NA
chr1:45798160-45798245/-	NA	NA	NA	NA	50	7.246	NA	NA	NA	NA	NA	NA	NA	NA	NA	NA	NA	NA	NA	NA	NA	NA	NA	NA	NA	NA	NA	NA	NA	NA
chr1:45798359-45798434/-	NA	NA	NA	NA	13.636	9.804	NA	NA	NA	NA	NA	NA	NA	NA	NA	NA	10.417	3.338	NA	NA	NA	NA	NA	NA	NA	NA	NA	NA	NA	NA
chr1:45798842-45798956/-	NA	NA	NA	NA	17.241	9.774	NA	NA	NA	NA	NA	NA	NA	NA	NA	NA	15.556	3.265	NA	NA	NA	NA	NA	NA	NA	NA	NA	NA	NA	NA
chr1:46081143-46082008/+	NA	NA	NA	NA	NA	NA	2.114	0.26	NA	NA	NA	NA	NA	NA	NA	NA	NA	NA	NA	NA	NA	NA	NA	NA	NA	NA	NA	NA	NA	NA
chr1:46096278-46099160/-	NA	NA	NA	NA	NA	NA	3.145	0.649	NA	NA	NA	NA	NA	NA	NA	NA	NA	NA	NA	NA	NA	NA	NA	NA	NA	NA	NA	NA	NA	NA
chr1:46099319-46099767/-	NA	NA	2.384	2.247	NA	NA	9.609	2.234	NA	NA	NA	NA	5.631	4.669	NA	NA	NA	NA	NA	NA	7.235	1.858	NA	NA	NA	NA	NA	NA	NA	NA
chr1:46108171-46120214/-	NA	NA	NA	NA	NA	NA	7.246	1.333	NA	NA	NA	NA	NA	NA	NA	NA	NA	NA	NA	NA	NA	NA	NA	NA	NA	NA	NA	NA	NA	NA
chr1:46120501-46120861/-	NA	NA	NA	NA	NA	NA	5.042	0.708	NA	NA	NA	NA	NA	NA	NA	NA	4.086	0.2	NA	NA	NA	NA	NA	NA	NA	NA	NA	NA	NA	NA
chr1:46120991-46124699/-	NA	NA	NA	NA	NA	NA	7.796	3.222	NA	NA	NA	NA	NA	NA	NA	NA	5.753	1.46	NA	NA	NA	NA	NA	NA	NA	NA	NA	NA	NA	NA
chr1:46124814-46125855/-	1.508	0.172	1.544	0.575	NA	NA	NA	NA	NA	NA	NA	NA	NA	NA	NA	NA	NA	NA	NA	NA	NA	NA	NA	NA	NA	NA	NA	NA	NA	NA
chr1:46348067-46425057/+	NA	NA	NA	NA	1.436	0.262	NA	NA	NA	NA	NA	NA	NA	NA	NA	NA	NA	NA	NA	NA	NA	NA	NA	NA	NA	NA	NA	NA	NA	NA
chr1:46658887-46658976/-	NA	NA	2.485	1.429	NA	NA	NA	NA	NA	NA	NA	NA	NA	NA	NA	NA	NA	NA	NA	NA	NA	NA	NA	NA	NA	NA	NA	NA	NA	NA
chr1:46659597-46659945/-	NA	NA	1.503	0	NA	NA	NA	NA	NA	NA	NA	NA	NA	NA	NA	NA	NA	NA	NA	NA	NA	NA	NA	NA	NA	NA	NA	NA	NA	NA
chr1:46660073-46660224/-	NA	NA	1.906	0.358	NA	NA	NA	NA	NA	NA	NA	NA	NA	NA	NA	NA	NA	NA	NA	NA	NA	NA	NA	NA	NA	NA	NA	NA	NA	NA
chr1:46662521-46662641/-	10.68	3.356	NA	NA	NA	NA	NA	NA	NA	NA	NA	NA	NA	NA	NA	NA	NA	NA	NA	NA	NA	NA	NA	NA	NA	NA	NA	NA	NA	NA
chr1:46662756-46663373/-	NA	NA	3.226	0.901	NA	NA	NA	NA	NA	NA	NA	NA	NA	NA	NA	NA	NA	NA	NA	NA	NA	NA	NA	NA	NA	NA	NA	NA	NA	NA
chr1:46745962-46746067/-	NA	NA	NA	NA	NA	NA	NA	NA	12.727	1.34	NA	NA	NA	NA	NA	NA	NA	NA	NA	NA	NA	NA	NA	NA	NA	NA	NA	NA	NA	NA
chr1:46746232-46746796/-	NA	NA	NA	NA	NA	NA	NA	NA	14.286	2.43	NA	NA	NA	NA	NA	NA	NA	NA	NA	NA	NA	NA	NA	NA	NA	NA	NA	NA	NA	NA
chr1:46775716-46775826/+	NA	NA	22.088	8.995	NA	NA	NA	NA	NA	NA	NA	NA	NA	NA	NA	NA	NA	NA	NA	NA	NA	NA	NA	NA	NA	NA	NA	NA	NA	NA
chr1:47152542-47154024/-	NA	NA	NA	NA	NA	NA	NA	NA	NA	NA	NA	NA	19	10	NA	NA	NA	NA	NA	NA	NA	NA	NA	NA	NA	NA	NA	NA	NA	NA
chr1:47761520-47765576/-	NA	NA	NA	NA	NA	NA	NA	NA	NA	NA	NA	NA	NA	NA	NA	NA	NA	NA	NA	NA	NA	NA	NA	NA	19.355	8.387	NA	NA	NA	NA
chr1:47767420-47767905/-	NA	NA	NA	NA	NA	NA	4.787	1.284	NA	NA	NA	NA	NA	NA	NA	NA	NA	NA	NA	NA	NA	NA	NA	NA	21.429	0.787	NA	NA	NA	NA
chr1:47768018-47770560/-	NA	NA	NA	NA	NA	NA	1.322	0.421	NA	NA	NA	NA	NA	NA	NA	NA	NA	NA	NA	NA	NA	NA	NA	NA	NA	NA	NA	NA	NA	NA
chr1:51001129-51005263/-	NA	NA	NA	NA	NA	NA	4.535	1.467	NA	NA	NA	NA	NA	NA	NA	NA	NA	NA	NA	NA	NA	NA	NA	NA	68.421	1.896	NA	NA	NA	NA
chr1:51049387-51050356/-	NA	NA	NA	NA	NA	NA	NA	NA	NA	NA	NA	NA	NA	NA	NA	NA	NA	NA	NA	NA	NA	NA	NA	NA	37.143	0	NA	NA	NA	NA
chr1:51171563-51204534/-	NA	NA	NA	NA	NA	NA	1.207	0.084	NA	NA	NA	NA	NA	NA	NA	NA	NA	NA	NA	NA	NA	NA	NA	NA	NA	NA	NA	NA	NA	NA
chr1:51210447-51253671/-	NA	NA	NA	NA	NA	NA	1.154	0.387	NA	NA	NA	NA	NA	NA	NA	NA	NA	NA	NA	NA	NA	NA	NA	NA	NA	NA	NA	NA	NA	NA
chr1:52215867-52221991/+	NA	NA	NA	NA	NA	NA	NA	NA	NA	NA	NA	NA	NA	NA	NA	NA	NA	NA	NA	NA	NA	NA	NA	NA	57.895	5.469	NA	NA	NA	NA
chr1:52222030-52226361/+	NA	NA	NA	NA	13.853	10.769	11.647	5.441	NA	NA	NA	NA	NA	NA	NA	NA	NA	NA	NA	NA	NA	NA	NA	NA	40	12.033	NA	NA	NA	NA
chr1:52280281-52280364/-	NA	NA	NA	NA	7.19	0.552	4.134	0.388	NA	NA	NA	NA	NA	NA	NA	NA	NA	NA	NA	NA	NA	NA	NA	NA	NA	NA	NA	NA	NA	NA
chr1:52291054-52293467/-	NA	NA	NA	NA	NA	NA	2.059	0.322	NA	NA	NA	NA	NA	NA	NA	NA	NA	NA	NA	NA	NA	NA	NA	NA	NA	NA	NA	NA	NA	NA
chr1:52820370-52820511/-	NA	NA	NA	NA	NA	NA	NA	NA	NA	NA	NA	NA	NA	NA	NA	NA	52.381	6.25	NA	NA	NA	NA	NA	NA	NA	NA	NA	NA	NA	NA
chr1:52849241-52849501/-	NA	NA	9.859	0.533	NA	NA	NA	NA	NA	NA	NA	NA	NA	NA	NA	NA	NA	NA	NA	NA	NA	NA	NA	NA	NA	NA	NA	NA	NA	NA
chr1:52849609-52850221/-	NA	NA	7.093	1.563	NA	NA	NA	NA	NA	NA	NA	NA	NA	NA	NA	NA	NA	NA	NA	NA	NA	NA	NA	NA	NA	NA	NA	NA	NA	NA
chr1:52850934-52851523/-	NA	NA	3.945	1.158	NA	NA	NA	NA	NA	NA	NA	NA	NA	NA	NA	NA	NA	NA	NA	NA	NA	NA	NA	NA	NA	NA	NA	NA	NA	NA
chr1:52854993-52859114/-	NA	NA	NA	NA	NA	NA	16.477	4.2	NA	NA	NA	NA	NA	NA	NA	NA	NA	NA	NA	NA	NA	NA	NA	NA	NA	NA	NA	NA	NA	NA
chr1:52859475-52861717/-	NA	NA	NA	NA	NA	NA	3.797	0.601	NA	NA	NA	NA	NA	NA	NA	NA	NA	NA	NA	NA	NA	NA	NA	NA	NA	NA	NA	NA	NA	NA
chr1:52943554-52947094/-	NA	NA	NA	NA	NA	NA	NA	NA	NA	NA	NA	NA	NA	NA	NA	NA	NA	NA	NA	NA	NA	NA	NA	NA	11.258	0	NA	NA	NA	NA
chr1:52947307-52947475/-	NA	NA	NA	NA	NA	NA	NA	NA	NA	NA	NA	NA	NA	NA	NA	NA	NA	NA	NA	NA	NA	NA	NA	NA	23.232	0.741	NA	NA	NA	NA
chr1:52947595-52954580/-	NA	NA	NA	NA	NA	NA	NA	NA	NA	NA	NA	NA	NA	NA	NA	NA	NA	NA	NA	NA	NA	NA	NA	NA	31.429	0.971	NA	NA	NA	NA
chr1:53343641-53347142/+	34.615	16.216	NA	NA	NA	NA	21.212	16.418	NA	NA	NA	NA	NA	NA	NA	NA	NA	NA	NA	NA	NA	NA	NA	NA	NA	NA	NA	NA	NA	NA
chr1:53726277-53727739/-	5.372	0.541	NA	NA	NA	NA	NA	NA	NA	NA	NA	NA	NA	NA	NA	NA	NA	NA	NA	NA	NA	NA	NA	NA	NA	NA	NA	NA	NA	NA
chr1:53730068-53732144/-	0.961	0	NA	NA	NA	NA	2.591	0.131	NA	NA	NA	NA	NA	NA	NA	NA	NA	NA	NA	NA	NA	NA	NA	NA	NA	NA	NA	NA	NA	NA
chr1:54511459-54512939/-	NA	NA	NA	NA	NA	NA	2.895	0.457	NA	NA	NA	NA	NA	NA	NA	NA	NA	NA	NA	NA	NA	NA	NA	NA	NA	NA	NA	NA	NA	NA
chr1:55340884-55341614/-	NA	NA	0.48	0.06	NA	NA	1.361	0	NA	NA	NA	NA	2.926	0.39	NA	NA	NA	NA	NA	NA	NA	NA	NA	NA	NA	NA	NA	NA	NA	NA
chr1:55569693-55571818/-	NA	NA	NA	NA	NA	NA	12	3.286	NA	NA	NA	NA	NA	NA	NA	NA	NA	NA	NA	NA	NA	NA	NA	NA	NA	NA	NA	NA	NA	NA
chr1:55573103-55575857/-	NA	NA	NA	NA	NA	NA	2.104	0.86	NA	NA	NA	NA	NA	NA	NA	NA	NA	NA	NA	NA	NA	NA	NA	NA	NA	NA	NA	NA	NA	NA
chr1:55614243-55619542/-	NA	NA	NA	NA	NA	NA	NA	NA	NA	NA	NA	NA	NA	NA	NA	NA	NA	NA	NA	NA	NA	NA	NA	NA	20.879	0	NA	NA	NA	NA
chr1:55619953-55620043/-	NA	NA	NA	NA	NA	NA	NA	NA	NA	NA	NA	NA	NA	NA	NA	NA	NA	NA	NA	NA	NA	NA	NA	NA	25.806	0	NA	NA	NA	NA
chr1:55620139-55620343/-	NA	NA	NA	NA	NA	NA	NA	NA	NA	NA	NA	NA	NA	NA	NA	NA	NA	NA	NA	NA	NA	NA	NA	NA	13.669	0	NA	NA	NA	NA
chr1:58971881-58992932/-	NA	NA	NA	NA	NA	NA	7.692	1.415	NA	NA	NA	NA	NA	NA	NA	NA	NA	NA	NA	NA	NA	NA	NA	NA	NA	NA	NA	NA	NA	NA
chr1:59141252-59142597/-	NA	NA	NA	NA	NA	NA	NA	NA	NA	NA	NA	NA	NA	NA	NA	NA	NA	NA	NA	NA	NA	NA	NA	NA	55.556	16.456	NA	NA	NA	NA
chr1:62905708-62907158/+	NA	NA	NA	NA	NA	NA	NA	NA	NA	NA	NA	NA	NA	NA	NA	NA	NA	NA	NA	NA	NA	NA	NA	NA	21.127	1.277	NA	NA	NA	NA
chr1:62907970-62908829/+	NA	NA	NA	NA	NA	NA	NA	NA	NA	NA	NA	NA	NA	NA	NA	NA	NA	NA	NA	NA	NA	NA	NA	NA	25.714	1.852	NA	NA	NA	NA
chr1:63005329-63005422/-	NA	NA	5.109	0.585	3.382	0	NA	NA	NA	NA	NA	NA	NA	NA	NA	NA	NA	NA	NA	NA	NA	NA	NA	NA	NA	NA	NA	NA	NA	NA
chr1:63282479-63284675/+	NA	NA	NA	NA	NA	NA	NA	NA	NA	NA	NA	NA	NA	NA	NA	NA	NA	NA	NA	NA	NA	NA	NA	NA	39.286	1.887	NA	NA	NA	NA
chr1:64475048-64515362/+	5.732	0	NA	NA	NA	NA	NA	NA	NA	NA	NA	NA	NA	NA	NA	NA	3.354	0.481	NA	NA	NA	NA	NA	NA	NA	NA	NA	NA	NA	NA
chr1:65047987-65068488/+	NA	NA	NA	NA	NA	NA	NA	NA	NA	NA	NA	NA	NA	NA	NA	NA	NA	NA	NA	NA	NA	NA	NA	NA	19.792	0.68	NA	NA	NA	NA
chr1:65138940-65139030/+	NA	NA	NA	NA	NA	NA	NA	NA	NA	NA	NA	NA	NA	NA	NA	NA	NA	NA	NA	NA	NA	NA	NA	NA	47.368	2.747	NA	NA	NA	NA
chr1:65141244-65141579/+	NA	NA	NA	NA	NA	NA	NA	NA	NA	NA	17.308	1.818	NA	NA	NA	NA	NA	NA	NA	NA	NA	NA	NA	NA	NA	NA	NA	NA	NA	NA
chr1:65339206-65344707/-	3.207	0.25	NA	NA	4.289	0.475	NA	NA	NA	NA	NA	NA	NA	NA	NA	NA	NA	NA	NA	NA	NA	NA	NA	NA	NA	NA	NA	NA	NA	NA
chr1:65831617-65831730/+	NA	NA	NA	NA	NA	NA	1.918	0	NA	NA	NA	NA	NA	NA	NA	NA	NA	NA	NA	NA	NA	NA	NA	NA	NA	NA	NA	NA	NA	NA
chr1:6592139-6592522/-	NA	NA	NA	NA	NA	NA	NA	NA	NA	NA	NA	NA	NA	NA	NA	NA	NA	NA	NA	NA	NA	NA	NA	NA	20	8	NA	NA	NA	NA
chr1:6592820-6593339/-	NA	NA	NA	NA	7.407	3.268	NA	NA	NA	NA	NA	NA	NA	NA	NA	NA	NA	NA	NA	NA	NA	NA	NA	NA	NA	NA	NA	NA	NA	NA
chr1:6604982-6605104/-	NA	NA	NA	NA	NA	NA	20.779	7.937	NA	NA	NA	NA	NA	NA	NA	NA	NA	NA	NA	NA	NA	NA	NA	NA	NA	NA	NA	NA	NA	NA
chr1:66723546-66731720/+	15.773	3.75	NA	NA	NA	NA	NA	NA	NA	NA	NA	NA	NA	NA	NA	NA	NA	NA	NA	NA	NA	NA	NA	NA	NA	NA	NA	NA	NA	NA
chr1:6713011-6713970/-	NA	NA	NA	NA	NA	NA	24.444	12.329	NA	NA	NA	NA	NA	NA	NA	NA	NA	NA	NA	NA	NA	NA	NA	NA	NA	NA	NA	NA	64.706	8.085
chr1:67136702-67137626/+	NA	NA	NA	NA	NA	NA	NA	NA	NA	NA	NA	NA	NA	NA	NA	NA	NA	NA	29.412	3.863	NA	NA	NA	NA	NA	NA	NA	NA	NA	NA
chr1:67149870-67154830/+	NA	NA	NA	NA	49.112	15.789	NA	NA	NA	NA	NA	NA	NA	NA	NA	NA	NA	NA	NA	NA	NA	NA	NA	NA	NA	NA	NA	NA	NA	NA
chr1:68603616-68610251/-	NA	NA	NA	NA	NA	NA	NA	NA	NA	NA	NA	NA	NA	NA	NA	NA	NA	NA	5.493	1.003	NA	NA	NA	NA	NA	NA	NA	NA	NA	NA
chr1:70694238-70696777/+	NA	NA	NA	NA	NA	NA	90.526	84.848	NA	NA	NA	NA	NA	NA	NA	NA	NA	NA	NA	NA	NA	NA	NA	NA	NA	NA	NA	NA	NA	NA
chr1:70697658-70697950/+	NA	NA	NA	NA	NA	NA	46.821	28.243	NA	NA	NA	NA	NA	NA	NA	NA	25.926	16.944	NA	NA	NA	NA	NA	NA	NA	NA	NA	NA	NA	NA
chr1:76256202-76256969/+	NA	NA	NA	NA	NA	NA	44.361	7.54	NA	NA	NA	NA	NA	NA	NA	NA	NA	NA	NA	NA	NA	NA	NA	NA	NA	NA	NA	NA	NA	NA
chr1:76257022-76257145/+	NA	NA	NA	NA	NA	NA	4.85	0.472	NA	NA	NA	NA	NA	NA	NA	NA	NA	NA	NA	NA	NA	NA	NA	NA	NA	NA	NA	NA	NA	NA
chr1:78105287-78107068/-	NA	NA	NA	NA	NA	NA	NA	NA	NA	NA	NA	NA	NA	NA	NA	NA	NA	NA	NA	NA	NA	NA	NA	NA	25.455	0	NA	NA	NA	NA
chr1:78324741-78324998/+	NA	NA	NA	NA	NA	NA	NA	NA	NA	NA	NA	NA	NA	NA	NA	NA	NA	NA	NA	NA	NA	NA	NA	NA	76.471	11.765	NA	NA	NA	NA
chr1:78414985-78420939/-	NA	NA	NA	NA	NA	NA	NA	NA	NA	NA	NA	NA	3.302	1.937	NA	NA	NA	NA	NA	NA	NA	NA	NA	NA	NA	NA	NA	NA	NA	NA
chr1:78421014-78422256/-	NA	NA	NA	NA	NA	NA	7.066	3.131	NA	NA	NA	NA	NA	NA	NA	NA	NA	NA	NA	NA	NA	NA	NA	NA	30.12	5.394	NA	NA	NA	NA
chr1:78425948-78426028/-	NA	NA	NA	NA	NA	NA	2.997	0.254	NA	NA	NA	NA	2.968	0.366	NA	NA	1.328	0.215	NA	NA	NA	NA	NA	NA	NA	NA	NA	NA	NA	NA
chr1:78426180-78428454/-	NA	NA	NA	NA	NA	NA	16.711	3.369	NA	NA	NA	NA	NA	NA	NA	NA	NA	NA	NA	NA	NA	NA	NA	NA	NA	NA	NA	NA	NA	NA
chr1:79094078-79094635/+	NA	NA	NA	NA	NA	NA	NA	NA	NA	NA	NA	NA	69.62	39.418	NA	NA	NA	NA	NA	NA	NA	NA	NA	NA	NA	NA	NA	NA	NA	NA
chr1:82416166-82416701/+	NA	NA	NA	NA	NA	NA	NA	NA	NA	NA	NA	NA	NA	NA	NA	NA	4.487	0	NA	NA	NA	NA	NA	NA	NA	NA	NA	NA	NA	NA
chr1:82417826-82418670/+	NA	NA	NA	NA	NA	NA	NA	NA	NA	NA	NA	NA	NA	NA	NA	NA	19.328	1.639	NA	NA	NA	NA	NA	NA	NA	NA	NA	NA	NA	NA
chr1:82418709-82421560/+	NA	NA	NA	NA	NA	NA	NA	NA	NA	NA	NA	NA	NA	NA	NA	NA	35.404	15.217	NA	NA	NA	NA	NA	NA	67.073	6.269	NA	NA	NA	NA
chr1:82421744-82431741/+	NA	NA	NA	NA	NA	NA	NA	NA	NA	NA	NA	NA	NA	NA	NA	NA	3.09	0.236	NA	NA	NA	NA	NA	NA	NA	NA	NA	NA	NA	NA
chr1:82431867-82432087/+	NA	NA	NA	NA	NA	NA	NA	NA	NA	NA	NA	NA	NA	NA	NA	NA	2.469	0.379	NA	NA	NA	NA	NA	NA	NA	NA	NA	NA	NA	NA
chr1:85128058-85128137/-	NA	NA	NA	NA	NA	NA	16.667	6.542	NA	NA	NA	NA	NA	NA	NA	NA	NA	NA	NA	NA	NA	NA	NA	NA	NA	NA	NA	NA	NA	NA
chr1:85136991-85146020/-	NA	NA	NA	NA	NA	NA	37.143	11.538	NA	NA	NA	NA	NA	NA	NA	NA	NA	NA	NA	NA	NA	NA	NA	NA	NA	NA	NA	NA	NA	NA
chr1:85403560-85403663/-	NA	NA	NA	NA	NA	NA	NA	NA	NA	NA	NA	NA	4.348	0.299	NA	NA	NA	NA	NA	NA	NA	NA	NA	NA	NA	NA	NA	NA	NA	NA
chr1:8617582-8674619/-	NA	NA	NA	NA	NA	NA	12.727	2.703	NA	NA	NA	NA	NA	NA	NA	NA	NA	NA	NA	NA	NA	NA	NA	NA	NA	NA	NA	NA	NA	NA
chr1:865716-866418/+	NA	NA	1.174	0	NA	NA	NA	NA	NA	NA	NA	NA	NA	NA	NA	NA	NA	NA	NA	NA	NA	NA	NA	NA	NA	NA	NA	NA	NA	NA
chr1:8674745-8684368/-	4.615	1.818	NA	NA	NA	NA	25.547	2.941	NA	NA	NA	NA	NA	NA	NA	NA	NA	NA	NA	NA	NA	NA	NA	NA	NA	NA	NA	NA	NA	NA
chr1:8923402-8923949/-	NA	NA	NA	NA	NA	NA	NA	NA	NA	NA	NA	NA	NA	NA	NA	NA	NA	NA	0.206	0.024	NA	NA	NA	NA	NA	NA	NA	NA	NA	NA
chr1:892405-892478/-	NA	NA	8.772	0.503	NA	NA	NA	NA	NA	NA	NA	NA	NA	NA	NA	NA	NA	NA	NA	NA	NA	NA	NA	NA	NA	NA	NA	NA	NA	NA
chr1:89250507-89251786/+	NA	NA	NA	NA	NA	NA	2.317	0.82	NA	NA	NA	NA	NA	NA	NA	NA	NA	NA	NA	NA	NA	NA	NA	NA	NA	NA	NA	NA	NA	NA
chr1:8926560-8927175/-	NA	NA	0.246	0.03	0.551	0.074	NA	NA	NA	NA	NA	NA	NA	NA	NA	NA	NA	NA	NA	NA	NA	NA	NA	NA	NA	NA	NA	NA	NA	NA
chr1:8932045-8934882/-	NA	NA	0.409	0.076	NA	NA	NA	NA	NA	NA	NA	NA	NA	NA	NA	NA	NA	NA	NA	NA	NA	NA	NA	NA	NA	NA	NA	NA	NA	NA
chr1:9117667-9118210/-	NA	NA	NA	NA	NA	NA	NA	NA	NA	NA	NA	NA	1.86	0.428	NA	NA	NA	NA	NA	NA	NA	NA	NA	NA	NA	NA	NA	NA	NA	NA
chr1:91383711-91403041/-	NA	NA	NA	NA	NA	NA	5.919	0.99	NA	NA	NA	NA	NA	NA	NA	NA	NA	NA	NA	NA	NA	NA	NA	NA	NA	NA	NA	NA	NA	NA
chr1:92732298-92733469/-	NA	NA	NA	NA	NA	NA	NA	NA	NA	NA	NA	NA	NA	NA	NA	NA	NA	NA	NA	NA	NA	NA	NA	NA	78.947	9.091	NA	NA	NA	NA
chr1:92786191-92789001/+	NA	NA	NA	NA	NA	NA	5.747	0.503	NA	NA	NA	NA	NA	NA	NA	NA	NA	NA	NA	NA	NA	NA	NA	NA	NA	NA	NA	NA	NA	NA
chr1:93101893-93128976/-	70	0	NA	NA	NA	NA	NA	NA	NA	NA	NA	NA	NA	NA	NA	NA	NA	NA	NA	NA	NA	NA	NA	NA	NA	NA	NA	NA	NA	NA
chr1:93159945-93160866/-	NA	NA	NA	NA	4.103	0.422	NA	NA	NA	NA	NA	NA	NA	NA	NA	NA	NA	NA	NA	NA	NA	NA	NA	NA	NA	NA	NA	NA	NA	NA
chr1:93301949-93303012/+	NA	NA	NA	NA	NA	NA	NA	NA	NA	NA	0.226	0.057	NA	NA	NA	NA	NA	NA	NA	NA	NA	NA	NA	NA	NA	NA	NA	NA	NA	NA
chr1:93683426-93687165/+	NA	NA	NA	NA	NA	NA	NA	NA	NA	NA	NA	NA	NA	NA	NA	NA	NA	NA	NA	NA	NA	NA	NA	NA	40.741	6.849	NA	NA	NA	NA
chr1:93790286-93791325/-	NA	NA	NA	NA	21.951	2.308	10.87	0.99	NA	NA	NA	NA	NA	NA	NA	NA	NA	NA	NA	NA	NA	NA	NA	NA	NA	NA	NA	NA	NA	NA
chr1:93804831-93804913/-	NA	NA	NA	NA	NA	NA	27.168	10.086	NA	NA	NA	NA	NA	NA	NA	NA	NA	NA	NA	NA	NA	NA	NA	NA	NA	NA	NA	NA	NA	NA
chr1:93805093-93805205/-	NA	NA	NA	NA	NA	NA	13.684	2.976	NA	NA	NA	NA	NA	NA	NA	NA	NA	NA	NA	NA	NA	NA	NA	NA	NA	NA	NA	NA	NA	NA
chr1:94054976-94057821/-	NA	NA	NA	NA	NA	NA	NA	NA	NA	NA	3.754	0.94	NA	NA	NA	NA	NA	NA	NA	NA	NA	NA	NA	NA	NA	NA	NA	NA	NA	NA
chr1:94107899-94140169/-	NA	NA	NA	NA	NA	NA	NA	NA	NA	NA	NA	NA	NA	NA	4.61	0.288	NA	NA	NA	NA	NA	NA	NA	NA	NA	NA	NA	NA	NA	NA
chr1:94667413-94668099/-	NA	NA	NA	NA	NA	NA	NA	NA	NA	NA	NA	NA	NA	NA	NA	NA	NA	NA	NA	NA	NA	NA	NA	NA	40	4.712	NA	NA	NA	NA
chr1:94668288-94668473/-	NA	NA	NA	NA	NA	NA	NA	NA	NA	NA	NA	NA	NA	NA	NA	NA	NA	NA	NA	NA	NA	NA	NA	NA	18.644	0	NA	NA	NA	NA
chr1:94953167-94953249/+	NA	NA	3.341	0.763	NA	NA	NA	NA	NA	NA	NA	NA	NA	NA	NA	NA	NA	NA	NA	NA	NA	NA	NA	NA	NA	NA	NA	NA	NA	NA
chr1:95367341-95367676/-	NA	NA	NA	NA	NA	NA	NA	NA	NA	NA	NA	NA	NA	NA	NA	NA	NA	NA	3.145	0.284	NA	NA	NA	NA	NA	NA	NA	NA	NA	NA
chr1:95368744-95368958/-	NA	NA	NA	NA	NA	NA	NA	NA	NA	NA	NA	NA	NA	NA	NA	NA	NA	NA	1.794	0.414	NA	NA	NA	NA	NA	NA	NA	NA	NA	NA
chr1:97243502-97250614/+	NA	NA	NA	NA	NA	NA	5.398	1	NA	NA	NA	NA	NA	NA	NA	NA	NA	NA	NA	NA	NA	NA	NA	NA	NA	NA	NA	NA	NA	NA
chr1:9770338-9770481/+	NA	NA	NA	NA	NA	NA	NA	NA	NA	NA	NA	NA	8.844	5.714	NA	NA	NA	NA	NA	NA	NA	NA	NA	NA	NA	NA	NA	NA	NA	NA
chr10:100193848-100195028/-	NA	NA	NA	NA	NA	NA	NA	NA	NA	NA	NA	NA	NA	NA	NA	NA	10.39	7.959	NA	NA	NA	NA	NA	NA	NA	NA	NA	NA	NA	NA
chr10:101554225-101556853/+	NA	NA	16.939	3.58	NA	NA	NA	NA	NA	NA	NA	NA	NA	NA	NA	NA	NA	NA	NA	NA	NA	NA	NA	NA	NA	NA	NA	NA	NA	NA
chr10:101559127-101560142/+	5.662	0.894	4.267	0.617	NA	NA	NA	NA	NA	NA	NA	NA	NA	NA	NA	NA	NA	NA	NA	NA	NA	NA	NA	NA	NA	NA	NA	NA	NA	NA
chr10:101567278-101567839/+	9.055	0.705	NA	NA	NA	NA	NA	NA	NA	NA	NA	NA	NA	NA	NA	NA	NA	NA	NA	NA	NA	NA	NA	NA	NA	NA	NA	NA	NA	NA
chr10:101569975-101571292/+	0.917	0.374	0.324	0.181	NA	NA	NA	NA	NA	NA	NA	NA	NA	NA	NA	NA	NA	NA	NA	NA	NA	NA	NA	NA	NA	NA	NA	NA	NA	NA
chr10:101571359-101572774/+	2.968	0.534	NA	NA	NA	NA	NA	NA	NA	NA	NA	NA	NA	NA	NA	NA	NA	NA	NA	NA	NA	NA	NA	NA	NA	NA	NA	NA	NA	NA
chr10:101577241-101578546/+	2.302	0.154	NA	NA	NA	NA	NA	NA	NA	NA	NA	NA	NA	NA	NA	NA	NA	NA	NA	NA	NA	NA	NA	NA	NA	NA	NA	NA	NA	NA
chr10:101590190-101590472/+	6.383	0.089	NA	NA	NA	NA	NA	NA	NA	NA	NA	NA	NA	NA	NA	NA	NA	NA	NA	NA	NA	NA	NA	NA	NA	NA	NA	NA	NA	NA
chr10:101591587-101591733/+	6.105	0.394	NA	NA	NA	NA	NA	NA	NA	NA	NA	NA	NA	NA	NA	NA	NA	NA	NA	NA	NA	NA	NA	NA	NA	NA	NA	NA	NA	NA
chr10:101591888-101594136/+	1.604	0.169	NA	NA	NA	NA	NA	NA	NA	NA	NA	NA	NA	NA	NA	NA	NA	NA	NA	NA	NA	NA	NA	NA	NA	NA	NA	NA	NA	NA
chr10:101594292-101595847/+	NA	NA	0.897	0.402	NA	NA	NA	NA	NA	NA	NA	NA	NA	NA	NA	NA	NA	NA	NA	NA	NA	NA	NA	NA	NA	NA	NA	NA	NA	NA
chr10:101604222-101605380/+	1.608	0.413	NA	NA	NA	NA	NA	NA	NA	NA	NA	NA	NA	NA	NA	NA	NA	NA	NA	NA	NA	NA	NA	NA	NA	NA	NA	NA	NA	NA
chr10:102286311-102286731/-	NA	NA	NA	NA	NA	NA	NA	NA	NA	NA	NA	NA	9.533	0.891	NA	NA	NA	NA	NA	NA	NA	NA	NA	NA	NA	NA	NA	NA	NA	NA
chr10:102740450-102740578/+	NA	NA	NA	NA	NA	NA	NA	NA	5.814	1.307	NA	NA	NA	NA	NA	NA	NA	NA	NA	NA	NA	NA	NA	NA	NA	NA	NA	NA	NA	NA
chr10:103342648-103343264/-	NA	NA	NA	NA	NA	NA	NA	NA	NA	NA	NA	NA	NA	NA	NA	NA	44.348	23.364	NA	NA	NA	NA	NA	NA	NA	NA	NA	NA	NA	NA
chr10:103432804-103433244/-	NA	NA	NA	NA	3.314	0.368	NA	NA	NA	NA	NA	NA	NA	NA	NA	NA	NA	NA	NA	NA	NA	NA	NA	NA	NA	NA	NA	NA	NA	NA
chr10:103550845-103551110/-	NA	NA	3.856	3.644	NA	NA	14.458	3.93	NA	NA	NA	NA	NA	NA	NA	NA	NA	NA	NA	NA	NA	NA	NA	NA	NA	NA	NA	NA	NA	NA
chr10:103551196-103552595/-	NA	NA	5.017	3.645	NA	NA	NA	NA	NA	NA	NA	NA	NA	NA	NA	NA	NA	NA	NA	NA	13.009	11.458	NA	NA	NA	NA	NA	NA	NA	NA
chr10:103552700-103553669/-	NA	NA	11.175	10.056	NA	NA	16.304	13.674	NA	NA	NA	NA	NA	NA	15.83	9.399	NA	NA	NA	NA	25.882	21.583	NA	NA	NA	NA	NA	NA	NA	NA
chr10:103553755-103557736/-	NA	NA	NA	NA	NA	NA	NA	NA	NA	NA	NA	NA	NA	NA	NA	NA	NA	NA	NA	NA	24.32	23.243	NA	NA	NA	NA	NA	NA	NA	NA
chr10:103557911-103558598/-	NA	NA	NA	NA	NA	NA	4.878	1.143	NA	NA	NA	NA	NA	NA	NA	NA	NA	NA	NA	NA	NA	NA	NA	NA	NA	NA	NA	NA	NA	NA
chr10:103771540-103772589/-	NA	NA	NA	NA	NA	NA	NA	NA	NA	NA	NA	NA	NA	NA	NA	NA	NA	NA	NA	NA	NA	NA	NA	NA	40.541	7.042	NA	NA	NA	NA
chr10:103869264-103869356/-	NA	NA	NA	NA	NA	NA	1.881	0.515	NA	NA	NA	NA	NA	NA	NA	NA	1.156	0.092	NA	NA	NA	NA	NA	NA	NA	NA	NA	NA	NA	NA
chr10:103869800-103870285/-	NA	NA	NA	NA	NA	NA	NA	NA	NA	NA	NA	NA	NA	NA	NA	NA	1.261	0.321	NA	NA	NA	NA	NA	NA	NA	NA	NA	NA	NA	NA
chr10:103870458-103870625/-	NA	NA	NA	NA	NA	NA	NA	NA	NA	NA	NA	NA	NA	NA	NA	NA	1.188	0.079	NA	NA	NA	NA	NA	NA	NA	NA	NA	NA	NA	NA
chr10:103870728-103870825/-	NA	NA	NA	NA	NA	NA	NA	NA	NA	NA	NA	NA	NA	NA	NA	NA	1.401	0.139	NA	NA	NA	NA	NA	NA	NA	NA	NA	NA	NA	NA
chr10:103870901-103871012/-	NA	NA	2.209	0.81	NA	NA	NA	NA	NA	NA	NA	NA	NA	NA	NA	NA	NA	NA	NA	NA	NA	NA	NA	NA	NA	NA	NA	NA	NA	NA
chr10:103871057-103871190/-	NA	NA	3.337	2.73	NA	NA	NA	NA	NA	NA	NA	NA	NA	NA	NA	NA	1.759	1.082	NA	NA	NA	NA	NA	NA	NA	NA	NA	NA	NA	NA
chr10:103898522-103898635/+	NA	NA	NA	NA	NA	NA	NA	NA	20.848	9.346	NA	NA	NA	NA	NA	NA	NA	NA	NA	NA	NA	NA	NA	NA	NA	NA	NA	NA	NA	NA
chr10:103904064-103904776/+	NA	NA	NA	NA	NA	NA	36.842	20	NA	NA	NA	NA	NA	NA	NA	NA	NA	NA	NA	NA	48.148	19.54	NA	NA	NA	NA	NA	NA	NA	NA
chr10:103908278-103908384/+	NA	NA	15.385	13.208	NA	NA	NA	NA	33.333	9.231	NA	NA	NA	NA	NA	NA	NA	NA	NA	NA	NA	NA	NA	NA	NA	NA	NA	NA	NA	NA
chr10:103916831-103916942/+	NA	NA	NA	NA	NA	NA	2.618	0.766	NA	NA	NA	NA	NA	NA	NA	NA	NA	NA	NA	NA	NA	NA	NA	NA	NA	NA	NA	NA	NA	NA
chr10:104118486-104119023/+	NA	NA	NA	NA	NA	NA	74.194	61.538	NA	NA	45.545	21.569	NA	NA	NA	NA	NA	NA	26.437	18.519	NA	NA	NA	NA	NA	NA	NA	NA	NA	NA
chr10:104122421-104123012/+	5.592	3.478	7.66	6.286	NA	NA	NA	NA	NA	NA	5.71	2.154	NA	NA	NA	NA	NA	NA	NA	NA	NA	NA	NA	NA	NA	NA	NA	NA	NA	NA
chr10:104128211-104128495/+	2.073	1.857	NA	NA	NA	NA	NA	NA	NA	NA	NA	NA	NA	NA	NA	NA	NA	NA	NA	NA	NA	NA	NA	NA	NA	NA	NA	NA	NA	NA
chr10:104128589-104128967/+	1.538	0	NA	NA	NA	NA	NA	NA	NA	NA	NA	NA	NA	NA	NA	NA	NA	NA	NA	NA	NA	NA	NA	NA	NA	NA	NA	NA	NA	NA
chr10:104244133-104245365/-	NA	NA	NA	NA	NA	NA	NA	NA	NA	NA	NA	NA	3.297	0	NA	NA	NA	NA	NA	NA	NA	NA	NA	NA	NA	NA	NA	NA	NA	NA
chr10:104853066-104853728/-	7.031	0.398	NA	NA	NA	NA	NA	NA	NA	NA	NA	NA	NA	NA	NA	NA	NA	NA	NA	NA	NA	NA	NA	NA	NA	NA	NA	NA	NA	NA
chr10:105194107-105194554/+	NA	NA	NA	NA	NA	NA	NA	NA	5.042	4.255	NA	NA	NA	NA	NA	NA	NA	NA	NA	NA	NA	NA	NA	NA	NA	NA	NA	NA	NA	NA
chr10:105197828-105198442/+	NA	NA	NA	NA	3.739	1.017	NA	NA	NA	NA	NA	NA	NA	NA	NA	NA	NA	NA	NA	NA	NA	NA	NA	NA	NA	NA	NA	NA	10.976	0.389
chr10:105371387-105372609/-	NA	NA	NA	NA	10.27	2.941	NA	NA	11.972	4.317	4.798	1.337	NA	NA	5	1.775	NA	NA	9.402	2.344	NA	NA	NA	NA	NA	NA	NA	NA	NA	NA
chr10:105377071-105382226/-	NA	NA	7.126	0.671	NA	NA	NA	NA	5.747	1.19	1.808	1.214	NA	NA	NA	NA	NA	NA	NA	NA	NA	NA	NA	NA	NA	NA	NA	NA	NA	NA
chr10:105386959-105420740/-	NA	NA	12	6.452	NA	NA	NA	NA	18.129	2.4	NA	NA	NA	NA	NA	NA	NA	NA	NA	NA	NA	NA	NA	NA	NA	NA	NA	NA	NA	NA
chr10:108378030-108380185/-	NA	NA	NA	NA	6.097	0.267	NA	NA	NA	NA	NA	NA	NA	NA	NA	NA	NA	NA	NA	NA	NA	NA	NA	NA	NA	NA	NA	NA	NA	NA
chr10:112262627-112266692/+	NA	NA	NA	NA	NA	NA	NA	NA	NA	NA	NA	NA	17.992	6.843	NA	NA	NA	NA	NA	NA	NA	NA	NA	NA	NA	NA	NA	NA	NA	NA
chr10:112356308-112357896/+	NA	NA	NA	NA	NA	NA	NA	NA	NA	NA	NA	NA	NA	NA	NA	NA	NA	NA	NA	NA	NA	NA	NA	NA	33.333	2.452	NA	NA	NA	NA
chr10:11312787-11317019/+	NA	NA	NA	NA	NA	NA	NA	NA	NA	NA	NA	NA	3.504	0.741	NA	NA	NA	NA	NA	NA	NA	NA	NA	NA	NA	NA	NA	NA	NA	NA
chr10:114169443-114170220/+	NA	NA	NA	NA	NA	NA	NA	NA	NA	NA	NA	NA	7.759	6.367	NA	NA	NA	NA	NA	NA	NA	NA	NA	NA	NA	NA	NA	NA	NA	NA
chr10:114799885-114849155/+	NA	NA	NA	NA	NA	NA	NA	NA	NA	NA	NA	NA	NA	NA	NA	NA	78.261	44	NA	NA	NA	NA	NA	NA	NA	NA	NA	NA	NA	NA
chr10:114799885-114849158/+	NA	NA	NA	NA	NA	NA	NA	NA	NA	NA	NA	NA	NA	NA	NA	NA	NA	NA	NA	NA	NA	NA	85.714	37.778	NA	NA	NA	NA	NA	NA
chr10:116247775-116251549/-	1.159	0	NA	NA	NA	NA	NA	NA	NA	NA	NA	NA	NA	NA	NA	NA	NA	NA	NA	NA	NA	NA	NA	NA	12.621	0	NA	NA	NA	NA
chr10:116605848-116605933/+	NA	NA	NA	NA	NA	NA	NA	NA	NA	NA	NA	NA	NA	NA	NA	NA	NA	NA	NA	NA	26.509	10.256	NA	NA	NA	NA	NA	NA	NA	NA
chr10:116881576-116887356/+	NA	NA	NA	NA	1.434	0	NA	NA	NA	NA	NA	NA	NA	NA	NA	NA	NA	NA	NA	NA	NA	NA	NA	NA	NA	NA	NA	NA	NA	NA
chr10:120488909-120489795/-	NA	NA	NA	NA	NA	NA	NA	NA	NA	NA	NA	NA	NA	NA	NA	NA	NA	NA	NA	NA	NA	NA	NA	NA	15.385	0	NA	NA	NA	NA
chr10:120818909-120819113/-	NA	NA	NA	NA	2.294	0.114	NA	NA	NA	NA	NA	NA	NA	NA	NA	NA	NA	NA	NA	NA	NA	NA	NA	NA	NA	NA	NA	NA	NA	NA
chr10:120920481-120920566/-	15.282	11.429	NA	NA	NA	NA	4.286	1.003	NA	NA	NA	NA	NA	NA	NA	NA	NA	NA	NA	NA	NA	NA	NA	NA	NA	NA	NA	NA	NA	NA
chr10:120928854-120931893/-	NA	NA	1.738	0.741	NA	NA	NA	NA	NA	NA	NA	NA	NA	NA	NA	NA	NA	NA	NA	NA	NA	NA	NA	NA	NA	NA	NA	NA	NA	NA
chr10:120934104-120936532/-	0.254	0.217	NA	NA	NA	NA	NA	NA	NA	NA	NA	NA	NA	NA	NA	NA	NA	NA	NA	NA	NA	NA	NA	NA	NA	NA	NA	NA	NA	NA
chr10:121339522-121339982/-	NA	NA	NA	NA	34.884	18.812	NA	NA	NA	NA	NA	NA	NA	NA	NA	NA	NA	NA	NA	NA	NA	NA	NA	NA	NA	NA	NA	NA	NA	NA
chr10:121341521-121341680/-	NA	NA	NA	NA	NA	NA	NA	NA	NA	NA	NA	NA	11.712	2.156	NA	NA	NA	NA	NA	NA	NA	NA	NA	NA	NA	NA	NA	NA	NA	NA
chr10:12136270-12139682/+	NA	NA	2.439	0.651	NA	NA	NA	NA	NA	NA	NA	NA	NA	NA	NA	NA	NA	NA	NA	NA	NA	NA	NA	NA	NA	NA	NA	NA	NA	NA
chr10:12148395-12149907/+	NA	NA	3.236	0	NA	NA	NA	NA	NA	NA	NA	NA	NA	NA	NA	NA	NA	NA	NA	NA	NA	NA	NA	NA	NA	NA	NA	NA	NA	NA
chr10:12155063-12159671/+	6.859	4.265	NA	NA	NA	NA	NA	NA	NA	NA	NA	NA	NA	NA	NA	NA	NA	NA	NA	NA	NA	NA	NA	NA	NA	NA	NA	NA	NA	NA
chr10:122278408-122280482/+	NA	NA	NA	NA	NA	NA	NA	NA	NA	NA	19.048	2.857	NA	NA	NA	NA	NA	NA	NA	NA	47.059	4.545	NA	NA	NA	NA	NA	NA	NA	NA
chr10:12252321-12257738/+	NA	NA	NA	NA	NA	NA	NA	NA	NA	NA	NA	NA	NA	NA	NA	NA	0.882	0.108	NA	NA	NA	NA	NA	NA	NA	NA	NA	NA	NA	NA
chr10:12257834-12259359/+	NA	NA	NA	NA	5.307	1.017	NA	NA	NA	NA	NA	NA	NA	NA	1.859	0.254	NA	NA	NA	NA	NA	NA	NA	NA	NA	NA	NA	NA	NA	NA
chr10:122618308-122619620/+	2.427	0.086	NA	NA	NA	NA	NA	NA	NA	NA	NA	NA	NA	NA	NA	NA	NA	NA	NA	NA	NA	NA	NA	NA	NA	NA	NA	NA	NA	NA
chr10:122619794-122622246/+	5.519	4.575	NA	NA	NA	NA	7.778	5.882	NA	NA	NA	NA	NA	NA	NA	NA	NA	NA	NA	NA	NA	NA	NA	NA	NA	NA	NA	NA	NA	NA
chr10:123274833-123276832/-	NA	NA	NA	NA	NA	NA	NA	NA	NA	NA	NA	NA	NA	NA	NA	NA	NA	NA	NA	NA	NA	NA	NA	NA	32.258	5.5	NA	NA	NA	NA
chr10:123278343-123279492/-	NA	NA	NA	NA	NA	NA	NA	NA	NA	NA	NA	NA	NA	NA	NA	NA	60.606	24.638	NA	NA	NA	NA	NA	NA	NA	NA	NA	NA	NA	NA
chr10:123629553-123658355/-	4.132	0.429	NA	NA	NA	NA	NA	NA	NA	NA	NA	NA	NA	NA	NA	NA	NA	NA	NA	NA	NA	NA	NA	NA	NA	NA	NA	NA	NA	NA
chr10:123718925-123719015/-	NA	NA	NA	NA	49.02	13.669	NA	NA	NA	NA	NA	NA	24.638	11.002	NA	NA	NA	NA	NA	NA	NA	NA	NA	NA	NA	NA	NA	NA	NA	NA
chr10:126631876-126655162/+	NA	NA	NA	NA	NA	NA	NA	NA	NA	NA	NA	NA	NA	NA	NA	NA	3.343	0	NA	NA	NA	NA	NA	NA	NA	NA	NA	NA	NA	NA
chr10:127504829-127505005/-	NA	NA	5.023	0.629	NA	NA	NA	NA	NA	NA	NA	NA	NA	NA	NA	NA	NA	NA	NA	NA	NA	NA	NA	NA	NA	NA	NA	NA	NA	NA
chr10:127541020-127541111/-	2.155	0.651	NA	NA	NA	NA	NA	NA	NA	NA	NA	NA	NA	NA	NA	NA	NA	NA	NA	NA	NA	NA	NA	NA	NA	NA	NA	NA	NA	NA
chr10:128769049-128776211/+	NA	NA	NA	NA	NA	NA	NA	NA	NA	NA	NA	NA	NA	NA	NA	NA	3.876	0	NA	NA	NA	NA	NA	NA	NA	NA	NA	NA	NA	NA
chr10:128860040-128904494/+	1.569	0	NA	NA	NA	NA	NA	NA	NA	NA	NA	NA	NA	NA	NA	NA	NA	NA	NA	NA	NA	NA	NA	NA	NA	NA	NA	NA	NA	NA
chr10:128923865-128925932/+	3.263	1.075	NA	NA	NA	NA	NA	NA	NA	NA	NA	NA	NA	NA	NA	NA	1.665	1.02	NA	NA	NA	NA	NA	NA	NA	NA	NA	NA	NA	NA
chr10:131958333-131959059/+	NA	NA	NA	NA	NA	NA	2.551	0.046	NA	NA	NA	NA	NA	NA	NA	NA	NA	NA	NA	NA	NA	NA	NA	NA	NA	NA	NA	NA	NA	NA
chr10:13237269-13239622/+	NA	NA	NA	NA	NA	NA	NA	NA	NA	NA	NA	NA	NA	NA	NA	NA	NA	NA	NA	NA	NA	NA	NA	NA	29.167	0.513	NA	NA	NA	NA
chr10:13378350-13380704/-	NA	NA	NA	NA	NA	NA	NA	NA	NA	NA	NA	NA	NA	NA	NA	NA	1.589	0.428	NA	NA	NA	NA	NA	NA	NA	NA	NA	NA	NA	NA
chr10:133784291-133784367/-	NA	NA	6.742	1.144	NA	NA	NA	NA	NA	NA	14.932	1.051	NA	NA	NA	NA	NA	NA	NA	NA	NA	NA	NA	NA	NA	NA	NA	NA	NA	NA
chr10:133786622-133787296/-	NA	NA	3.648	1.505	NA	NA	NA	NA	NA	NA	NA	NA	NA	NA	NA	NA	NA	NA	NA	NA	NA	NA	NA	NA	NA	NA	NA	NA	NA	NA
chr10:13380808-13386757/-	NA	NA	NA	NA	NA	NA	NA	NA	1.887	0	NA	NA	NA	NA	NA	NA	1.02	0.817	NA	NA	NA	NA	NA	NA	NA	NA	NA	NA	NA	NA
chr10:134039120-134039250/-	NA	NA	2.16	0	NA	NA	NA	NA	NA	NA	NA	NA	NA	NA	NA	NA	NA	NA	NA	NA	NA	NA	NA	NA	NA	NA	NA	NA	NA	NA
chr10:135212730-135213032/+	NA	NA	NA	NA	10.448	0.592	NA	NA	NA	NA	NA	NA	NA	NA	NA	NA	NA	NA	NA	NA	NA	NA	NA	NA	NA	NA	NA	NA	NA	NA
chr10:135213123-135215032/+	NA	NA	35.26	14.36	NA	NA	NA	NA	NA	NA	NA	NA	NA	NA	NA	NA	NA	NA	NA	NA	51.149	20.914	NA	NA	NA	NA	NA	NA	NA	NA
chr10:13701490-13702315/-	NA	NA	NA	NA	NA	NA	NA	NA	NA	NA	NA	NA	NA	NA	NA	NA	NA	NA	NA	NA	5.245	0.684	NA	NA	NA	NA	NA	NA	NA	NA
chr10:13705509-13708096/-	NA	NA	NA	NA	NA	NA	NA	NA	NA	NA	NA	NA	NA	NA	NA	NA	NA	NA	NA	NA	3.579	0.654	NA	NA	NA	NA	NA	NA	NA	NA
chr10:14893322-14894368/+	NA	NA	NA	NA	NA	NA	7.819	3.771	NA	NA	NA	NA	NA	NA	NA	NA	NA	NA	NA	NA	NA	NA	NA	NA	NA	NA	NA	NA	NA	NA
chr10:15174932-15175051/-	NA	NA	NA	NA	NA	NA	NA	NA	NA	NA	NA	NA	NA	NA	NA	NA	NA	NA	26.316	2.128	NA	NA	NA	NA	NA	NA	NA	NA	NA	NA
chr10:15876615-15879202/-	NA	NA	NA	NA	NA	NA	NA	NA	NA	NA	NA	NA	NA	NA	NA	NA	NA	NA	NA	NA	NA	NA	NA	NA	20	0	NA	NA	NA	NA
chr10:15879317-15880226/-	NA	NA	NA	NA	NA	NA	28.846	28.125	NA	NA	NA	NA	NA	NA	NA	NA	NA	NA	NA	NA	NA	NA	NA	NA	35.135	9.353	NA	NA	NA	NA
chr10:15880278-15883424/-	NA	NA	NA	NA	NA	NA	NA	NA	NA	NA	NA	NA	NA	NA	NA	NA	NA	NA	NA	NA	NA	NA	NA	NA	53.846	10.744	NA	NA	NA	NA
chr10:15885271-15889862/-	NA	NA	NA	NA	NA	NA	NA	NA	NA	NA	NA	NA	NA	NA	NA	NA	NA	NA	NA	NA	NA	NA	NA	NA	53.846	1.754	NA	NA	NA	NA
chr10:17645647-17645724/-	NA	NA	NA	NA	10.345	4.456	NA	NA	NA	NA	NA	NA	NA	NA	NA	NA	NA	NA	NA	NA	NA	NA	NA	NA	NA	NA	NA	NA	NA	NA
chr10:17726749-17726830/+	18.056	0.246	NA	NA	NA	NA	NA	NA	NA	NA	NA	NA	NA	NA	NA	NA	NA	NA	NA	NA	NA	NA	NA	NA	NA	NA	NA	NA	NA	NA
chr10:18898855-18903388/-	NA	NA	NA	NA	NA	NA	6.574	3.03	NA	NA	NA	NA	NA	NA	NA	NA	NA	NA	NA	NA	NA	NA	NA	NA	NA	NA	NA	NA	NA	NA
chr10:21970305-21971153/+	NA	NA	NA	NA	NA	NA	NA	NA	NA	NA	NA	NA	NA	NA	NA	NA	4.989	1.036	NA	NA	NA	NA	NA	NA	75	9.589	NA	NA	NA	NA
chr10:21971186-21977419/+	NA	NA	NA	NA	NA	NA	27.273	8.219	NA	NA	NA	NA	NA	NA	NA	NA	9.924	8.696	NA	NA	NA	NA	NA	NA	100	27.778	NA	NA	NA	NA
chr10:22019983-22021827/+	NA	NA	NA	NA	NA	NA	11.957	3.297	NA	NA	NA	NA	NA	NA	NA	NA	NA	NA	NA	NA	NA	NA	NA	NA	NA	NA	NA	NA	NA	NA
chr10:22022521-22022696/+	NA	NA	NA	NA	NA	NA	NA	NA	NA	NA	NA	NA	8.725	1.512	NA	NA	NA	NA	NA	NA	NA	NA	NA	NA	NA	NA	NA	NA	NA	NA
chr10:22896952-22898548/-	NA	NA	NA	NA	5.714	0	NA	NA	NA	NA	NA	NA	NA	NA	NA	NA	NA	NA	NA	NA	NA	NA	NA	NA	NA	NA	NA	NA	NA	NA
chr10:24820922-24821998/+	NA	NA	NA	NA	NA	NA	NA	NA	NA	NA	NA	NA	NA	NA	9.244	6.286	NA	NA	NA	NA	NA	NA	NA	NA	NA	NA	NA	NA	NA	NA
chr10:24896530-24896673/-	NA	NA	NA	NA	NA	NA	1.071	0	NA	NA	NA	NA	NA	NA	NA	NA	NA	NA	NA	NA	NA	NA	NA	NA	NA	NA	NA	NA	NA	NA
chr10:28899750-28900183/+	NA	NA	NA	NA	NA	NA	69.231	29.167	NA	NA	NA	NA	NA	NA	NA	NA	NA	NA	NA	NA	NA	NA	NA	NA	NA	NA	NA	NA	NA	NA
chr10:28900410-28900702/+	NA	NA	NA	NA	NA	NA	55.556	40.23	NA	NA	NA	NA	NA	NA	NA	NA	NA	NA	NA	NA	NA	NA	NA	NA	NA	NA	NA	NA	NA	NA
chr10:3146136-3147306/+	3.456	1.106	NA	NA	NA	NA	NA	NA	NA	NA	1.33	0.686	NA	NA	NA	NA	NA	NA	NA	NA	NA	NA	NA	NA	NA	NA	NA	NA	NA	NA
chr10:3147351-3147584/+	2.996	1.146	3.854	1.322	NA	NA	NA	NA	NA	NA	NA	NA	NA	NA	NA	NA	NA	NA	NA	NA	NA	NA	NA	NA	NA	NA	NA	NA	NA	NA
chr10:3149501-3150892/+	2.368	0.112	NA	NA	NA	NA	NA	NA	NA	NA	NA	NA	NA	NA	NA	NA	NA	NA	NA	NA	NA	NA	NA	NA	NA	NA	NA	NA	NA	NA
chr10:3159038-3160973/+	NA	NA	NA	NA	NA	NA	NA	NA	NA	NA	1.659	0.115	NA	NA	NA	NA	NA	NA	NA	NA	NA	NA	NA	NA	NA	NA	NA	NA	NA	NA
chr10:3162236-3172010/+	NA	NA	NA	NA	NA	NA	NA	NA	NA	NA	NA	NA	NA	NA	NA	NA	NA	NA	NA	NA	2.125	1.411	NA	NA	NA	NA	NA	NA	NA	NA
chr10:3202128-3202395/-	1.869	0.225	NA	NA	NA	NA	NA	NA	NA	NA	NA	NA	NA	NA	NA	NA	NA	NA	NA	NA	NA	NA	NA	NA	NA	NA	NA	NA	NA	NA
chr10:3207526-3207604/-	NA	NA	NA	NA	NA	NA	15.888	1.538	NA	NA	NA	NA	NA	NA	NA	NA	NA	NA	NA	NA	NA	NA	NA	NA	NA	NA	NA	NA	NA	NA
chr10:3208572-3209127/-	3.379	0.182	NA	NA	NA	NA	NA	NA	NA	NA	NA	NA	NA	NA	NA	NA	NA	NA	NA	NA	NA	NA	NA	NA	NA	NA	NA	NA	NA	NA
chr10:32310059-32310153/-	NA	NA	NA	NA	NA	NA	2.452	1.702	NA	NA	NA	NA	NA	NA	NA	NA	NA	NA	NA	NA	NA	NA	NA	NA	NA	NA	NA	NA	NA	NA
chr10:32323766-32324449/-	NA	NA	NA	NA	NA	NA	NA	NA	NA	NA	NA	NA	NA	NA	NA	NA	NA	NA	NA	NA	NA	NA	NA	NA	100	0.78	NA	NA	NA	NA
chr10:33209012-33209172/-	2.1	0.064	NA	NA	NA	NA	NA	NA	NA	NA	NA	NA	NA	NA	NA	NA	NA	NA	NA	NA	NA	NA	NA	NA	NA	NA	NA	NA	NA	NA
chr10:33209313-33211184/-	3.436	0.183	NA	NA	NA	NA	2.642	0.918	NA	NA	NA	NA	NA	NA	1.933	0.107	NA	NA	NA	NA	NA	NA	NA	NA	NA	NA	NA	NA	NA	NA
chr10:33211274-33211567/-	0.913	0.026	NA	NA	NA	NA	NA	NA	NA	NA	NA	NA	NA	NA	NA	NA	NA	NA	NA	NA	NA	NA	NA	NA	NA	NA	NA	NA	NA	NA
chr10:33212668-33214798/-	NA	NA	NA	NA	NA	NA	1.079	0.066	NA	NA	NA	NA	NA	NA	NA	NA	NA	NA	NA	NA	NA	NA	NA	NA	NA	NA	NA	NA	NA	NA
chr10:33215037-33217021/-	NA	NA	NA	NA	NA	NA	NA	NA	NA	NA	NA	NA	NA	NA	2.053	0.044	NA	NA	NA	NA	NA	NA	NA	NA	NA	NA	NA	NA	NA	NA
chr10:33217192-33218749/-	NA	NA	NA	NA	NA	NA	NA	NA	NA	NA	NA	NA	NA	NA	1.252	0.055	NA	NA	NA	NA	NA	NA	NA	NA	NA	NA	NA	NA	NA	NA
chr10:33218972-33221442/-	NA	NA	NA	NA	NA	NA	NA	NA	NA	NA	NA	NA	NA	NA	1.437	0.053	NA	NA	NA	NA	NA	NA	NA	NA	NA	NA	NA	NA	NA	NA
chr10:33221528-33224419/-	2.139	0.068	NA	NA	NA	NA	3.853	0	NA	NA	NA	NA	NA	NA	1.925	0.044	NA	NA	NA	NA	NA	NA	NA	NA	NA	NA	NA	NA	NA	NA
chr10:34759191-34805906/-	1.313	0.104	NA	NA	NA	NA	NA	NA	NA	NA	NA	NA	2.002	1.282	NA	NA	NA	NA	NA	NA	NA	NA	NA	NA	NA	NA	NA	NA	NA	NA
chr10:35818958-35819051/+	NA	NA	NA	NA	2.315	0	NA	NA	NA	NA	NA	NA	NA	NA	NA	NA	NA	NA	NA	NA	NA	NA	NA	NA	NA	NA	NA	NA	NA	NA
chr10:43315872-43315955/+	NA	NA	NA	NA	NA	NA	11.236	4.021	NA	NA	NA	NA	NA	NA	NA	NA	NA	NA	16.923	0.546	NA	NA	NA	NA	NA	NA	NA	NA	NA	NA
chr10:43656043-43659313/+	NA	NA	NA	NA	7.609	5.923	NA	NA	NA	NA	NA	NA	NA	NA	NA	NA	NA	NA	NA	NA	NA	NA	NA	NA	NA	NA	NA	NA	NA	NA
chr10:47164993-47165481/-	NA	NA	NA	NA	NA	NA	NA	NA	NA	NA	NA	NA	NA	NA	4.284	3.471	NA	NA	NA	NA	NA	NA	NA	NA	NA	NA	NA	NA	NA	NA
chr10:47165561-47166220/-	NA	NA	NA	NA	NA	NA	NA	NA	NA	NA	NA	NA	NA	NA	1.669	1.602	NA	NA	NA	NA	NA	NA	NA	NA	NA	NA	NA	NA	NA	NA
chr10:48263869-48264357/+	NA	NA	NA	NA	NA	NA	NA	NA	NA	NA	NA	NA	NA	NA	4.011	2.256	NA	NA	NA	NA	NA	NA	NA	NA	NA	NA	NA	NA	NA	NA
chr10:50098772-50105498/+	NA	NA	NA	NA	NA	NA	NA	NA	NA	NA	NA	NA	6.061	0.206	NA	NA	NA	NA	NA	NA	NA	NA	NA	NA	NA	NA	NA	NA	NA	NA
chr10:50105619-50108265/+	NA	NA	NA	NA	NA	NA	NA	NA	NA	NA	NA	NA	2.73	0	NA	NA	NA	NA	NA	NA	NA	NA	NA	NA	NA	NA	NA	NA	NA	NA
chr10:50108351-50109845/+	NA	NA	NA	NA	NA	NA	NA	NA	NA	NA	NA	NA	8.966	0.911	NA	NA	NA	NA	NA	NA	NA	NA	NA	NA	NA	NA	NA	NA	NA	NA
chr10:50151494-50154084/+	NA	NA	NA	NA	NA	NA	NA	NA	NA	NA	NA	NA	7.483	0.633	NA	NA	NA	NA	NA	NA	NA	NA	NA	NA	NA	NA	NA	NA	NA	NA
chr10:51087876-51093248/-	NA	NA	NA	NA	1.786	0	NA	NA	NA	NA	NA	NA	NA	NA	NA	NA	NA	NA	NA	NA	NA	NA	NA	NA	NA	NA	NA	NA	NA	NA
chr10:51579282-51580555/+	NA	NA	NA	NA	NA	NA	NA	NA	NA	NA	NA	NA	NA	NA	NA	NA	NA	NA	2.918	0.28	NA	NA	NA	NA	NA	NA	NA	NA	NA	NA
chr10:51580968-51581269/+	NA	NA	0.209	0.147	NA	NA	NA	NA	NA	NA	NA	NA	NA	NA	NA	NA	NA	NA	NA	NA	NA	NA	NA	NA	NA	NA	NA	NA	NA	NA
chr10:5493900-5494320/+	NA	NA	NA	NA	NA	NA	4.652	0.489	NA	NA	NA	NA	NA	NA	NA	NA	NA	NA	NA	NA	NA	NA	NA	NA	NA	NA	NA	NA	NA	NA
chr10:5495309-5495446/+	NA	NA	NA	NA	NA	NA	7.114	2.755	NA	NA	NA	NA	NA	NA	NA	NA	NA	NA	NA	NA	NA	NA	NA	NA	NA	NA	NA	NA	NA	NA
chr10:5762631-5762717/+	4.695	1.182	NA	NA	6.533	2.752	21.285	5.755	NA	NA	NA	NA	NA	NA	NA	NA	NA	NA	9.244	0	NA	NA	NA	NA	NA	NA	NA	NA	NA	NA
chr10:5957534-5958196/+	7.13	4.744	NA	NA	NA	NA	NA	NA	NA	NA	NA	NA	NA	NA	NA	NA	NA	NA	NA	NA	NA	NA	NA	NA	NA	NA	NA	NA	NA	NA
chr10:6257280-6258087/+	3.515	0.665	NA	NA	NA	NA	NA	NA	NA	NA	NA	NA	NA	NA	NA	NA	NA	NA	NA	NA	NA	NA	NA	NA	NA	NA	NA	NA	NA	NA
chr10:6258154-6258668/+	NA	NA	NA	NA	NA	NA	NA	NA	NA	NA	8.696	0	NA	NA	NA	NA	NA	NA	NA	NA	NA	NA	NA	NA	NA	NA	NA	NA	NA	NA
chr10:6263490-6263603/+	2.447	0.129	NA	NA	NA	NA	NA	NA	NA	NA	NA	NA	NA	NA	NA	NA	NA	NA	NA	NA	NA	NA	NA	NA	NA	NA	NA	NA	NA	NA
chr10:6265983-6266111/+	2.837	0.448	NA	NA	NA	NA	NA	NA	NA	NA	NA	NA	NA	NA	NA	NA	NA	NA	NA	NA	NA	NA	NA	NA	NA	NA	NA	NA	NA	NA
chr10:62670748-62671108/-	NA	NA	5.882	0.946	NA	NA	NA	NA	NA	NA	NA	NA	NA	NA	NA	NA	NA	NA	NA	NA	NA	NA	NA	NA	NA	NA	NA	NA	NA	NA
chr10:63810759-63816875/+	NA	NA	NA	NA	NA	NA	NA	NA	NA	NA	20.986	1.533	NA	NA	NA	NA	NA	NA	NA	NA	NA	NA	NA	NA	NA	NA	NA	NA	NA	NA
chr10:63819054-63829458/+	NA	NA	NA	NA	NA	NA	NA	NA	NA	NA	31.429	1.875	NA	NA	NA	NA	NA	NA	NA	NA	NA	NA	NA	NA	NA	NA	NA	NA	NA	NA
chr10:64936233-64937476/-	NA	NA	NA	NA	NA	NA	12.5	1.786	NA	NA	NA	NA	NA	NA	NA	NA	NA	NA	NA	NA	NA	NA	NA	NA	NA	NA	NA	NA	NA	NA
chr10:69750157-69750660/-	4.469	3.704	NA	NA	NA	NA	NA	NA	NA	NA	3.904	0.778	NA	NA	NA	NA	NA	NA	NA	NA	NA	NA	NA	NA	NA	NA	NA	NA	NA	NA
chr10:69804320-69832639/-	NA	NA	NA	NA	NA	NA	6.838	5.147	NA	NA	NA	NA	NA	NA	NA	NA	NA	NA	NA	NA	NA	NA	NA	NA	NA	NA	NA	NA	NA	NA
chr10:70098444-70098896/+	NA	NA	NA	NA	NA	NA	12.8	8.959	NA	NA	NA	NA	NA	NA	NA	NA	NA	NA	NA	NA	NA	NA	NA	NA	NA	NA	NA	NA	NA	NA
chr10:70136729-70139180/-	NA	NA	NA	NA	NA	NA	NA	NA	NA	NA	NA	NA	NA	NA	NA	NA	NA	NA	NA	NA	NA	NA	NA	NA	85.185	17.808	NA	NA	NA	NA
chr10:70182186-70182271/-	NA	NA	NA	NA	NA	NA	6.912	1.567	NA	NA	NA	NA	NA	NA	NA	NA	NA	NA	NA	NA	NA	NA	NA	NA	NA	NA	NA	NA	NA	NA
chr10:70182361-70182453/-	NA	NA	NA	NA	NA	NA	6.276	1.288	NA	NA	NA	NA	NA	NA	NA	NA	NA	NA	NA	NA	NA	NA	NA	NA	NA	NA	NA	NA	NA	NA
chr10:70252955-70253205/-	NA	NA	NA	NA	NA	NA	5.882	0.84	NA	NA	NA	NA	NA	NA	NA	NA	NA	NA	NA	NA	NA	NA	NA	NA	NA	NA	NA	NA	NA	NA
chr10:70411693-70412257/+	NA	NA	NA	NA	NA	NA	NA	NA	NA	NA	NA	NA	NA	NA	NA	NA	NA	NA	NA	NA	NA	NA	NA	NA	5.319	0	NA	NA	NA	NA
chr10:70412351-70426801/+	NA	NA	NA	NA	NA	NA	4.132	0	NA	NA	NA	NA	NA	NA	NA	NA	NA	NA	NA	NA	NA	NA	NA	NA	17.143	1.754	NA	NA	NA	NA
chr10:70497646-70500385/+	NA	NA	NA	NA	NA	NA	1.285	0.067	NA	NA	NA	NA	NA	NA	NA	NA	NA	NA	NA	NA	NA	NA	NA	NA	NA	NA	NA	NA	NA	NA
chr10:70507032-70507130/+	NA	NA	2.02	0.571	NA	NA	NA	NA	NA	NA	NA	NA	NA	NA	NA	NA	NA	NA	NA	NA	NA	NA	NA	NA	NA	NA	NA	NA	NA	NA
chr10:70515293-70516029/+	NA	NA	NA	NA	NA	NA	21.718	18.036	NA	NA	NA	NA	NA	NA	NA	NA	NA	NA	NA	NA	NA	NA	NA	NA	NA	NA	NA	NA	NA	NA
chr10:70730106-70731646/+	NA	NA	NA	NA	NA	NA	NA	NA	NA	NA	NA	NA	NA	NA	NA	NA	1.282	1.092	NA	NA	NA	NA	NA	NA	NA	NA	NA	NA	NA	NA
chr10:71152064-71154705/+	NA	NA	NA	NA	NA	NA	1.125	0.85	NA	NA	NA	NA	NA	NA	NA	NA	NA	NA	NA	NA	NA	NA	NA	NA	NA	NA	NA	NA	NA	NA
chr10:71243632-71244896/+	5.043	0.822	NA	NA	NA	NA	NA	NA	NA	NA	NA	NA	NA	NA	NA	NA	NA	NA	NA	NA	NA	NA	NA	NA	NA	NA	NA	NA	NA	NA
chr10:71264241-71265879/+	1.547	0.526	NA	NA	NA	NA	NA	NA	NA	NA	NA	NA	NA	NA	NA	NA	NA	NA	NA	NA	NA	NA	NA	NA	NA	NA	NA	NA	NA	NA
chr10:71920825-71921374/-	NA	NA	NA	NA	NA	NA	1.759	1.06	NA	NA	0.625	0.277	NA	NA	NA	NA	NA	NA	NA	NA	NA	NA	NA	NA	NA	NA	NA	NA	NA	NA
chr10:71921494-71921613/-	NA	NA	NA	NA	NA	NA	3.805	0.915	NA	NA	NA	NA	NA	NA	NA	NA	NA	NA	NA	NA	NA	NA	NA	NA	NA	NA	NA	NA	NA	NA
chr10:7242446-7244441/-	NA	NA	NA	NA	NA	NA	NA	NA	NA	NA	NA	NA	20	1.235	NA	NA	NA	NA	NA	NA	NA	NA	NA	NA	NA	NA	NA	NA	NA	NA
chr10:72468534-72489049/+	NA	NA	NA	NA	3.383	0.734	NA	NA	NA	NA	NA	NA	NA	NA	NA	NA	NA	NA	NA	NA	NA	NA	NA	NA	NA	NA	NA	NA	NA	NA
chr10:72493784-72494924/+	NA	NA	NA	NA	11.246	3.468	NA	NA	NA	NA	NA	NA	NA	NA	NA	NA	NA	NA	NA	NA	NA	NA	NA	NA	NA	NA	NA	NA	NA	NA
chr10:72495057-72496435/+	NA	NA	NA	NA	7.177	1.84	NA	NA	NA	NA	NA	NA	NA	NA	NA	NA	NA	NA	NA	NA	NA	NA	NA	NA	NA	NA	NA	NA	NA	NA
chr10:7262499-7269816/-	12.15	1.887	NA	NA	NA	NA	NA	NA	NA	NA	NA	NA	NA	NA	NA	NA	NA	NA	NA	NA	NA	NA	NA	NA	NA	NA	NA	NA	NA	NA
chr10:7327916-7409610/-	5.49	0	3.825	0	NA	NA	14.516	1.449	NA	NA	NA	NA	NA	NA	NA	NA	NA	NA	NA	NA	NA	NA	NA	NA	NA	NA	NA	NA	NA	NA
chr10:74474984-74475611/+	NA	NA	NA	NA	NA	NA	10.631	0	NA	NA	3.963	0	NA	NA	NA	NA	7.968	3.704	6.977	4.762	NA	NA	NA	NA	NA	NA	NA	NA	NA	NA
chr10:75264748-75265065/-	NA	NA	NA	NA	NA	NA	NA	NA	NA	NA	60	55.385	NA	NA	NA	NA	NA	NA	NA	NA	NA	NA	NA	NA	NA	NA	NA	NA	NA	NA
chr10:75301496-75302560/-	4.323	2.732	5.423	2.239	NA	NA	NA	NA	NA	NA	NA	NA	NA	NA	NA	NA	NA	NA	NA	NA	NA	NA	NA	NA	NA	NA	NA	NA	NA	NA
chr10:75335433-75335555/-	NA	NA	NA	NA	NA	NA	NA	NA	NA	NA	NA	NA	NA	NA	NA	NA	NA	NA	NA	NA	NA	NA	NA	NA	86.667	55	NA	NA	NA	NA
chr10:75506474-75506562/+	NA	NA	NA	NA	9.783	4.425	NA	NA	NA	NA	NA	NA	NA	NA	NA	NA	NA	NA	NA	NA	NA	NA	NA	NA	NA	NA	NA	NA	NA	NA
chr10:75566232-75566414/-	NA	NA	NA	NA	NA	NA	NA	NA	NA	NA	12.807	7.874	NA	NA	NA	NA	NA	NA	NA	NA	NA	NA	NA	NA	NA	NA	NA	NA	NA	NA
chr10:75566569-75566865/-	NA	NA	NA	NA	NA	NA	NA	NA	NA	NA	20	12.143	NA	NA	NA	NA	NA	NA	NA	NA	NA	NA	NA	NA	NA	NA	NA	NA	NA	NA
chr10:75607105-75607745/-	NA	NA	NA	NA	6.522	1.429	NA	NA	NA	NA	NA	NA	NA	NA	NA	NA	NA	NA	NA	NA	NA	NA	NA	NA	NA	NA	NA	NA	NA	NA
chr10:75607840-75608283/-	6.32	1.408	6.991	0.952	4.762	1.087	NA	NA	NA	NA	NA	NA	NA	NA	NA	NA	NA	NA	NA	NA	NA	NA	NA	NA	NA	NA	NA	NA	NA	NA
chr10:75849107-75849780/+	NA	NA	NA	NA	NA	NA	NA	NA	NA	NA	NA	NA	NA	NA	NA	NA	NA	NA	0.955	0	NA	NA	NA	NA	NA	NA	NA	NA	NA	NA
chr10:75863686-75864808/+	NA	NA	NA	NA	NA	NA	NA	NA	NA	NA	NA	NA	NA	NA	NA	NA	NA	NA	NA	NA	NA	NA	NA	NA	9.237	3.417	NA	NA	NA	NA
chr10:79742575-79743677/-	NA	NA	NA	NA	NA	NA	4.498	0.769	NA	NA	NA	NA	NA	NA	NA	NA	NA	NA	NA	NA	NA	NA	NA	NA	NA	NA	NA	NA	NA	NA
chr10:79743770-79743962/-	NA	NA	NA	NA	NA	NA	4.453	1.604	NA	NA	NA	NA	NA	NA	NA	NA	NA	NA	NA	NA	NA	NA	NA	NA	NA	NA	NA	NA	NA	NA
chr10:79745743-79745830/-	NA	NA	42.157	4.478	NA	NA	NA	NA	NA	NA	NA	NA	NA	NA	NA	NA	NA	NA	NA	NA	NA	NA	NA	NA	NA	NA	NA	NA	NA	NA
chr10:82228443-82248972/+	NA	NA	NA	NA	7.879	0	NA	NA	NA	NA	NA	NA	NA	NA	NA	NA	NA	NA	NA	NA	NA	NA	NA	NA	NA	NA	NA	NA	NA	NA
chr10:82249070-82264483/+	NA	NA	NA	NA	NA	NA	10.092	0.637	NA	NA	NA	NA	NA	NA	NA	NA	NA	NA	NA	NA	NA	NA	NA	NA	NA	NA	NA	NA	NA	NA
chr10:861010-863664/-	NA	NA	NA	NA	NA	NA	NA	NA	5.556	0	NA	NA	NA	NA	NA	NA	NA	NA	NA	NA	NA	NA	NA	NA	NA	NA	NA	NA	NA	NA
chr10:88598736-88635623/+	NA	NA	NA	NA	NA	NA	NA	NA	NA	NA	NA	NA	NA	NA	NA	NA	NA	NA	NA	NA	NA	NA	NA	NA	13.725	0.361	NA	NA	NA	NA
chr10:88819998-88820444/-	NA	NA	NA	NA	NA	NA	NA	NA	NA	NA	1.823	1.661	NA	NA	NA	NA	NA	NA	NA	NA	NA	NA	NA	NA	NA	NA	NA	NA	NA	NA
chr10:889008-890916/-	NA	NA	NA	NA	NA	NA	NA	NA	NA	NA	NA	NA	NA	NA	NA	NA	NA	NA	NA	NA	NA	NA	NA	NA	43.902	2.857	NA	NA	NA	NA
chr10:89690846-89692769/+	NA	NA	1.319	1.241	1.823	0.8	NA	NA	NA	NA	NA	NA	NA	NA	NA	NA	NA	NA	NA	NA	NA	NA	NA	NA	NA	NA	NA	NA	NA	NA
chr10:910210-915952/-	6.667	5.263	NA	NA	NA	NA	NA	NA	NA	NA	NA	NA	NA	NA	NA	NA	NA	NA	NA	NA	NA	NA	NA	NA	NA	NA	NA	NA	NA	NA
chr10:91477252-91477332/+	NA	NA	NA	NA	NA	NA	NA	NA	NA	NA	NA	NA	NA	NA	NA	NA	NA	NA	NA	NA	NA	NA	NA	NA	19.355	0	NA	NA	NA	NA
chr10:93593781-93596675/+	NA	NA	NA	NA	3.061	0.356	NA	NA	NA	NA	NA	NA	NA	NA	NA	NA	NA	NA	NA	NA	NA	NA	NA	NA	NA	NA	NA	NA	NA	NA
chr10:93711323-93713493/+	NA	NA	NA	NA	NA	NA	NA	NA	NA	NA	NA	NA	NA	NA	NA	NA	NA	NA	NA	NA	NA	NA	NA	NA	13.008	0.258	NA	NA	NA	NA
chr10:93713630-93716284/+	NA	NA	NA	NA	NA	NA	6.05	1.734	NA	NA	NA	NA	NA	NA	NA	NA	NA	NA	NA	NA	NA	NA	NA	NA	25.532	3.889	NA	NA	NA	NA
chr10:93716414-93716981/+	NA	NA	NA	NA	NA	NA	NA	NA	NA	NA	NA	NA	NA	NA	NA	NA	NA	NA	NA	NA	NA	NA	NA	NA	9.251	0.703	NA	NA	NA	NA
chr10:93723958-93726393/+	NA	NA	NA	NA	NA	NA	NA	NA	NA	NA	NA	NA	1.961	0.344	NA	NA	NA	NA	NA	NA	NA	NA	NA	NA	NA	NA	NA	NA	NA	NA
chr10:93754401-93756125/+	2.317	1.16	NA	NA	NA	NA	NA	NA	NA	NA	NA	NA	NA	NA	NA	NA	NA	NA	NA	NA	NA	NA	NA	NA	15.789	1.639	NA	NA	NA	NA
chr10:93756327-93757359/+	NA	NA	NA	NA	NA	NA	1.282	0.377	NA	NA	NA	NA	NA	NA	NA	NA	NA	NA	NA	NA	NA	NA	NA	NA	NA	NA	NA	NA	NA	NA
chr10:93768707-93768797/+	NA	NA	NA	NA	NA	NA	2.625	0.073	NA	NA	NA	NA	NA	NA	NA	NA	NA	NA	NA	NA	6.289	0	NA	NA	NA	NA	NA	NA	NA	NA
chr10:94267962-94268484/-	NA	NA	15.094	0.412	NA	NA	NA	NA	NA	NA	NA	NA	NA	NA	NA	NA	NA	NA	NA	NA	NA	NA	NA	NA	NA	NA	NA	NA	NA	NA
chr10:95107539-95109564/-	NA	NA	NA	NA	NA	NA	NA	NA	NA	NA	5.451	0.274	NA	NA	NA	NA	NA	NA	NA	NA	NA	NA	NA	NA	NA	NA	NA	NA	NA	NA
chr10:95141153-95147553/-	NA	NA	NA	NA	NA	NA	NA	NA	NA	NA	NA	NA	NA	NA	NA	NA	NA	NA	0.973	0.109	NA	NA	NA	NA	NA	NA	NA	NA	NA	NA
chr10:96350309-96350394/+	NA	NA	NA	NA	NA	NA	NA	NA	NA	NA	NA	NA	NA	NA	NA	NA	NA	NA	NA	NA	NA	NA	NA	NA	7.907	0.559	NA	NA	NA	NA
chr10:96350533-96351985/+	NA	NA	NA	NA	NA	NA	NA	NA	NA	NA	NA	NA	NA	NA	NA	NA	NA	NA	NA	NA	NA	NA	NA	NA	3.205	0	NA	NA	NA	NA
chr10:98319493-98321734/-	NA	NA	NA	NA	NA	NA	NA	NA	NA	NA	NA	NA	NA	NA	NA	NA	NA	NA	NA	NA	NA	NA	NA	NA	14.783	0.756	NA	NA	NA	NA
chr10:99023386-99024582/-	NA	NA	NA	NA	NA	NA	3.943	0.88	NA	NA	NA	NA	NA	NA	NA	NA	NA	NA	NA	NA	NA	NA	NA	NA	NA	NA	NA	NA	NA	NA
chr10:99150296-99150495/-	NA	NA	6.577	0	NA	NA	NA	NA	NA	NA	NA	NA	NA	NA	NA	NA	NA	NA	NA	NA	NA	NA	NA	NA	NA	NA	NA	NA	NA	NA
chr10:99197032-99197456/-	3.746	1.035	NA	NA	NA	NA	NA	NA	NA	NA	NA	NA	NA	NA	NA	NA	NA	NA	NA	NA	NA	NA	NA	NA	NA	NA	NA	NA	44	3.65
chr10:99220764-99221252/-	NA	NA	NA	NA	NA	NA	NA	NA	3.787	1.238	NA	NA	NA	NA	NA	NA	2.695	0.453	NA	NA	NA	NA	NA	NA	NA	NA	NA	NA	NA	NA
chr10:99221379-99221584/-	NA	NA	NA	NA	NA	NA	NA	NA	4.006	2.113	6.016	2.249	NA	NA	NA	NA	2.984	0.871	NA	NA	NA	NA	NA	NA	NA	NA	NA	NA	NA	NA
chr10:99221876-99222339/-	NA	NA	NA	NA	NA	NA	NA	NA	1.022	0.946	NA	NA	NA	NA	NA	NA	NA	NA	NA	NA	NA	NA	NA	NA	NA	NA	NA	NA	NA	NA
chr10:99222439-99223614/-	8.026	5.986	NA	NA	NA	NA	NA	NA	NA	NA	9.068	2.133	NA	NA	NA	NA	NA	NA	NA	NA	NA	NA	NA	NA	NA	NA	NA	NA	NA	NA
chr10:99225711-99225815/-	4.464	0.813	4.636	2.294	NA	NA	NA	NA	NA	NA	4.152	0.368	NA	NA	NA	NA	2.545	0.397	NA	NA	NA	NA	NA	NA	NA	NA	NA	NA	NA	NA
chr10:99225916-99226260/-	11.55	7.407	NA	NA	NA	NA	NA	NA	NA	NA	NA	NA	NA	NA	NA	NA	NA	NA	NA	NA	NA	NA	NA	NA	NA	NA	NA	NA	NA	NA
chr10:99226342-99226532/-	3.704	3.571	NA	NA	NA	NA	NA	NA	NA	NA	2.581	0.499	NA	NA	NA	NA	NA	NA	NA	NA	NA	NA	NA	NA	NA	NA	NA	NA	NA	NA
chr10:99228861-99229402/-	NA	NA	NA	NA	NA	NA	NA	NA	NA	NA	NA	NA	10.596	5.134	NA	NA	5.344	4.16	NA	NA	NA	NA	NA	NA	NA	NA	NA	NA	NA	NA
chr10:99230618-99236439/-	NA	NA	4.131	3.158	NA	NA	NA	NA	NA	NA	1.493	1.239	NA	NA	NA	NA	2.708	0.591	NA	NA	NA	NA	NA	NA	NA	NA	NA	NA	NA	NA
chr10:99236501-99236591/-	NA	NA	NA	NA	NA	NA	15.932	8.392	NA	NA	NA	NA	28.063	16.708	16.568	14.688	NA	NA	NA	NA	32.847	18.31	NA	NA	39.726	13.253	NA	NA	NA	NA
chr10:99236720-99237103/-	NA	NA	NA	NA	NA	NA	7.692	7.435	NA	NA	NA	NA	NA	NA	7.865	5.795	NA	NA	NA	NA	11.772	4.225	NA	NA	44.33	16.022	NA	NA	NA	NA
chr10:99237173-99237611/-	NA	NA	NA	NA	NA	NA	NA	NA	NA	NA	NA	NA	NA	NA	4.71	1.033	2.601	1.391	3.256	1.082	7.792	2.212	NA	NA	19.565	1.188	NA	NA	NA	NA
chr10:99237686-99238060/-	NA	NA	NA	NA	NA	NA	NA	NA	NA	NA	NA	NA	NA	NA	NA	NA	1.488	0	NA	NA	6.055	0	NA	NA	NA	NA	NA	NA	NA	NA
chr10:99502921-99504485/+	NA	NA	NA	NA	NA	NA	24.706	2.165	NA	NA	NA	NA	NA	NA	NA	NA	NA	NA	NA	NA	NA	NA	NA	NA	NA	NA	NA	NA	NA	NA
chr11:10518485-10521632/+	NA	NA	NA	NA	NA	NA	23.077	15.044	NA	NA	NA	NA	NA	NA	NA	NA	NA	NA	NA	NA	NA	NA	NA	NA	NA	NA	NA	NA	NA	NA
chr11:10615146-10615692/-	NA	NA	NA	NA	NA	NA	NA	NA	NA	NA	NA	NA	NA	NA	NA	NA	NA	NA	8.397	0.901	NA	NA	NA	NA	NA	NA	NA	NA	NA	NA
chr11:107676241-107677442/-	NA	NA	NA	NA	9.836	5.455	NA	NA	NA	NA	NA	NA	NA	NA	NA	NA	NA	NA	NA	NA	NA	NA	NA	NA	NA	NA	NA	NA	NA	NA
chr11:108040770-108042925/-	NA	NA	NA	NA	NA	NA	2.03	0.821	NA	NA	NA	NA	NA	NA	NA	NA	NA	NA	NA	NA	NA	NA	NA	NA	NA	NA	NA	NA	NA	NA
chr11:108203627-108204612/+	NA	NA	NA	NA	NA	NA	NA	NA	NA	NA	NA	NA	NA	NA	NA	NA	NA	NA	NA	NA	NA	NA	NA	NA	25.926	5.185	NA	NA	NA	NA
chr11:10822194-10822277/-	NA	NA	NA	NA	NA	NA	NA	NA	NA	NA	NA	NA	NA	NA	NA	NA	NA	NA	1.754	0.78	NA	NA	NA	NA	NA	NA	NA	NA	NA	NA
chr11:10822634-10823207/-	NA	NA	NA	NA	NA	NA	1.777	1.495	NA	NA	NA	NA	NA	NA	NA	NA	NA	NA	NA	NA	NA	NA	NA	NA	NA	NA	NA	NA	NA	NA
chr11:10823756-10823840/-	NA	NA	NA	NA	NA	NA	NA	NA	NA	NA	NA	NA	0.965	0.464	NA	NA	NA	NA	NA	NA	NA	NA	NA	NA	NA	NA	NA	NA	NA	NA
chr11:10824675-10824757/-	NA	NA	NA	NA	NA	NA	NA	NA	NA	NA	NA	NA	0.692	0.445	NA	NA	NA	NA	NA	NA	NA	NA	NA	NA	NA	NA	NA	NA	NA	NA
chr11:10825137-10825445/-	NA	NA	NA	NA	NA	NA	NA	NA	NA	NA	NA	NA	5.208	1.674	NA	NA	NA	NA	NA	NA	2.768	0.998	NA	NA	NA	NA	NA	NA	NA	NA
chr11:10825597-10825683/-	NA	NA	NA	NA	NA	NA	NA	NA	NA	NA	NA	NA	9.827	2.189	NA	NA	NA	NA	NA	NA	5.84	2.293	NA	NA	NA	NA	NA	NA	NA	NA
chr11:10825965-10826459/-	NA	NA	NA	NA	NA	NA	NA	NA	NA	NA	NA	NA	1.485	0.481	NA	NA	NA	NA	NA	NA	NA	NA	NA	NA	NA	NA	NA	NA	NA	NA
chr11:10828432-10828801/-	NA	NA	NA	NA	NA	NA	NA	NA	NA	NA	NA	NA	2.162	0.85	NA	NA	NA	NA	NA	NA	NA	NA	NA	NA	NA	NA	NA	NA	NA	NA
chr11:108546453-108547811/+	NA	NA	NA	NA	NA	NA	4	0.508	NA	NA	NA	NA	NA	NA	NA	NA	NA	NA	NA	NA	NA	NA	NA	NA	NA	NA	NA	NA	NA	NA
chr11:111228435-111228519/-	NA	NA	NA	NA	NA	NA	NA	NA	NA	NA	NA	NA	21.25	4.444	NA	NA	NA	NA	NA	NA	NA	NA	NA	NA	NA	NA	NA	NA	NA	NA
chr11:111844978-111845599/+	NA	NA	NA	NA	2.417	0	NA	NA	NA	NA	NA	NA	NA	NA	NA	NA	NA	NA	NA	NA	NA	NA	NA	NA	NA	NA	NA	NA	NA	NA
chr11:113683226-113684606/-	NA	NA	NA	NA	NA	NA	NA	NA	NA	NA	NA	NA	NA	NA	NA	NA	NA	NA	NA	NA	NA	NA	NA	NA	31.818	1.478	NA	NA	NA	NA
chr11:113700067-113701588/-	NA	NA	NA	NA	NA	NA	NA	NA	NA	NA	NA	NA	NA	NA	NA	NA	NA	NA	NA	NA	NA	NA	NA	NA	37.5	7.438	NA	NA	NA	NA
chr11:113701665-113702641/-	NA	NA	NA	NA	NA	NA	NA	NA	NA	NA	NA	NA	NA	NA	NA	NA	NA	NA	NA	NA	NA	NA	NA	NA	39.394	23.188	NA	NA	NA	NA
chr11:113702715-113704141/-	NA	NA	NA	NA	NA	NA	NA	NA	NA	NA	NA	NA	NA	NA	NA	NA	NA	NA	NA	NA	NA	NA	NA	NA	35.135	19.497	NA	NA	NA	NA
chr11:11394176-11398728/-	NA	NA	NA	NA	NA	NA	NA	NA	NA	NA	NA	NA	31.579	8.108	NA	NA	NA	NA	NA	NA	NA	NA	NA	NA	NA	NA	NA	NA	NA	NA
chr11:116629895-116631450/-	NA	NA	NA	NA	NA	NA	NA	NA	NA	NA	NA	NA	NA	NA	NA	NA	NA	NA	NA	NA	14.483	8.333	NA	NA	NA	NA	NA	NA	NA	NA
chr11:116655637-116655814/-	NA	NA	37.596	2.725	NA	NA	NA	NA	NA	NA	NA	NA	NA	NA	NA	NA	NA	NA	NA	NA	NA	NA	NA	NA	NA	NA	NA	NA	NA	NA
chr11:116657775-116658197/-	4.847	0.816	2.139	0.515	NA	NA	NA	NA	NA	NA	NA	NA	NA	NA	NA	NA	NA	NA	NA	NA	NA	NA	NA	NA	NA	NA	NA	NA	NA	NA
chr11:116738805-116741046/-	NA	NA	NA	NA	18.125	10.68	NA	NA	NA	NA	NA	NA	NA	NA	NA	NA	NA	NA	NA	NA	NA	NA	NA	NA	NA	NA	NA	NA	NA	NA
chr11:117052253-117052522/+	NA	NA	NA	NA	NA	NA	NA	NA	NA	NA	3.246	0.444	NA	NA	NA	NA	NA	NA	NA	NA	NA	NA	NA	NA	NA	NA	NA	NA	NA	NA
chr11:117053336-117053438/+	4.53	0	NA	NA	NA	NA	NA	NA	NA	NA	NA	NA	NA	NA	NA	NA	NA	NA	NA	NA	NA	NA	NA	NA	NA	NA	NA	NA	NA	NA
chr11:117059542-117059884/+	7.113	0.699	NA	NA	NA	NA	NA	NA	NA	NA	NA	NA	NA	NA	NA	NA	NA	NA	NA	NA	NA	NA	NA	NA	NA	NA	NA	NA	NA	NA
chr11:118244400-118245610/+	NA	NA	NA	NA	NA	NA	NA	NA	NA	NA	NA	NA	NA	NA	NA	NA	NA	NA	NA	NA	NA	NA	NA	NA	27.273	10.169	NA	NA	NA	NA
chr11:118355029-118355576/+	NA	NA	NA	NA	NA	NA	NA	NA	NA	NA	NA	NA	NA	NA	NA	NA	NA	NA	NA	NA	NA	NA	NA	NA	16.923	4.598	NA	NA	NA	NA
chr11:118362643-118363771/+	NA	NA	NA	NA	6.081	2.703	NA	NA	NA	NA	NA	NA	NA	NA	NA	NA	NA	NA	NA	NA	NA	NA	NA	NA	NA	NA	NA	NA	NA	NA
chr11:118370628-118371701/+	NA	NA	NA	NA	2.45	0.437	NA	NA	NA	NA	NA	NA	NA	NA	NA	NA	NA	NA	NA	NA	3.861	3.529	NA	NA	NA	NA	NA	NA	NA	NA
chr11:118422567-118422928/-	NA	NA	NA	NA	NA	NA	NA	NA	NA	NA	3.774	0.619	NA	NA	NA	NA	NA	NA	NA	NA	NA	NA	NA	NA	NA	NA	NA	NA	NA	NA
chr11:118629611-118630630/-	NA	NA	NA	NA	NA	NA	NA	NA	NA	NA	NA	NA	NA	NA	NA	NA	NA	NA	NA	NA	NA	NA	NA	NA	11.475	0.917	NA	NA	NA	NA
chr11:118630753-118633920/-	NA	NA	NA	NA	NA	NA	NA	NA	NA	NA	NA	NA	NA	NA	NA	NA	NA	NA	NA	NA	NA	NA	NA	NA	7.229	0.424	NA	NA	NA	NA
chr11:118942553-118943907/+	NA	NA	NA	NA	NA	NA	NA	NA	NA	NA	NA	NA	20.635	10.204	NA	NA	NA	NA	NA	NA	NA	NA	NA	NA	NA	NA	NA	NA	NA	NA
chr11:118944109-118944509/+	NA	NA	NA	NA	NA	NA	NA	NA	NA	NA	NA	NA	32.075	28.205	NA	NA	NA	NA	NA	NA	NA	NA	NA	NA	NA	NA	NA	NA	NA	NA
chr11:118968753-118969112/-	4.694	2.543	NA	NA	NA	NA	NA	NA	NA	NA	4.499	3.093	NA	NA	NA	NA	NA	NA	4.348	0.286	NA	NA	NA	NA	NA	NA	NA	NA	NA	NA
chr11:118971118-118971339/-	NA	NA	NA	NA	NA	NA	4.054	1.022	NA	NA	NA	NA	NA	NA	NA	NA	NA	NA	NA	NA	NA	NA	NA	NA	NA	NA	NA	NA	NA	NA
chr11:119002692-119003205/+	NA	NA	NA	NA	NA	NA	NA	NA	NA	NA	NA	NA	NA	NA	NA	NA	3.382	1.193	NA	NA	NA	NA	NA	NA	NA	NA	NA	NA	NA	NA
chr11:11941798-11941888/+	NA	NA	NA	NA	3.797	0	NA	NA	NA	NA	NA	NA	NA	NA	NA	NA	NA	NA	NA	NA	NA	NA	NA	NA	NA	NA	NA	NA	NA	NA
chr11:119546020-119547811/-	NA	NA	NA	NA	NA	NA	NA	NA	NA	NA	NA	NA	NA	NA	2.066	1.812	NA	NA	NA	NA	NA	NA	NA	NA	NA	NA	NA	NA	NA	NA
chr11:119548567-119549124/-	NA	NA	NA	NA	NA	NA	NA	NA	NA	NA	NA	NA	NA	NA	NA	NA	2.345	1.563	NA	NA	NA	NA	NA	NA	NA	NA	NA	NA	NA	NA
chr11:120278532-120280102/+	NA	NA	NA	NA	NA	NA	4.032	1.493	NA	NA	NA	NA	NA	NA	NA	NA	NA	NA	NA	NA	NA	NA	NA	NA	NA	NA	NA	NA	NA	NA
chr11:120295124-120298777/+	NA	NA	NA	NA	NA	NA	NA	NA	NA	NA	NA	NA	NA	NA	1.035	0.621	NA	NA	NA	NA	NA	NA	NA	NA	NA	NA	NA	NA	NA	NA
chr11:120319923-120322220/+	0.975	0	NA	NA	NA	NA	NA	NA	NA	NA	NA	NA	NA	NA	NA	NA	NA	NA	NA	NA	NA	NA	NA	NA	NA	NA	NA	NA	NA	NA
chr11:120924441-120925760/+	NA	NA	NA	NA	NA	NA	NA	NA	NA	NA	NA	NA	10.638	1.37	NA	NA	NA	NA	9.63	3.268	NA	NA	NA	NA	NA	NA	NA	NA	NA	NA
chr11:121348952-121358740/+	NA	NA	NA	NA	NA	NA	NA	NA	NA	NA	NA	NA	1.909	0.65	NA	NA	NA	NA	NA	NA	NA	NA	NA	NA	NA	NA	NA	NA	NA	NA
chr11:121358902-121360751/+	NA	NA	2.851	0	NA	NA	NA	NA	NA	NA	NA	NA	NA	NA	NA	NA	NA	NA	NA	NA	NA	NA	NA	NA	NA	NA	NA	NA	NA	NA
chr11:121367758-121383711/+	NA	NA	NA	NA	NA	NA	NA	NA	NA	NA	NA	NA	1.559	0	NA	NA	NA	NA	NA	NA	NA	NA	NA	NA	NA	NA	NA	NA	NA	NA
chr11:121393412-121393624/+	NA	NA	NA	NA	NA	NA	NA	NA	NA	NA	NA	NA	2.385	0.26	NA	NA	NA	NA	NA	NA	NA	NA	NA	NA	NA	NA	NA	NA	NA	NA
chr11:121403261-121414256/+	NA	NA	NA	NA	NA	NA	NA	NA	NA	NA	NA	NA	6.283	1.362	NA	NA	NA	NA	NA	NA	NA	NA	NA	NA	NA	NA	NA	NA	NA	NA
chr11:121421379-121424645/+	NA	NA	NA	NA	NA	NA	NA	NA	NA	NA	NA	NA	13.725	3.5	NA	NA	NA	NA	NA	NA	NA	NA	NA	NA	NA	NA	NA	NA	NA	NA
chr11:121428114-121429299/+	NA	NA	NA	NA	NA	NA	NA	NA	NA	NA	NA	NA	3.033	0.441	NA	NA	NA	NA	NA	NA	NA	NA	NA	NA	NA	NA	NA	NA	NA	NA
chr11:121481867-121483444/+	NA	NA	NA	NA	NA	NA	NA	NA	6.897	3.295	NA	NA	NA	NA	NA	NA	NA	NA	NA	NA	NA	NA	NA	NA	NA	NA	NA	NA	NA	NA
chr11:123464874-123465442/+	NA	NA	NA	NA	NA	NA	NA	NA	NA	NA	NA	NA	16.327	1.796	NA	NA	NA	NA	NA	NA	NA	NA	NA	NA	NA	NA	NA	NA	NA	NA
chr11:123465546-123466649/+	NA	NA	15.436	0.588	NA	NA	NA	NA	NA	NA	NA	NA	NA	NA	NA	NA	NA	NA	NA	NA	NA	NA	NA	NA	NA	NA	NA	NA	NA	NA
chr11:123489508-123489814/+	NA	NA	NA	NA	6.061	3.597	NA	NA	NA	NA	NA	NA	6.358	1.141	NA	NA	NA	NA	NA	NA	NA	NA	NA	NA	NA	NA	NA	NA	NA	NA
chr11:123988261-123988379/+	NA	NA	3.065	1.007	NA	NA	NA	NA	NA	NA	NA	NA	NA	NA	NA	NA	NA	NA	NA	NA	NA	NA	NA	NA	NA	NA	NA	NA	NA	NA
chr11:123988582-123988895/+	NA	NA	31.356	5.092	26.531	2.041	NA	NA	NA	NA	NA	NA	NA	NA	NA	NA	NA	NA	NA	NA	NA	NA	NA	NA	NA	NA	NA	NA	NA	NA
chr11:123989118-123989239/+	NA	NA	2.512	1.043	NA	NA	NA	NA	NA	NA	NA	NA	NA	NA	NA	NA	NA	NA	NA	NA	NA	NA	NA	NA	NA	NA	NA	NA	NA	NA
chr11:125864284-125864765/-	NA	NA	NA	NA	NA	NA	NA	NA	NA	NA	NA	NA	NA	NA	NA	NA	NA	NA	NA	NA	NA	NA	NA	NA	31.25	1.075	NA	NA	NA	NA
chr11:126142974-126143210/+	NA	NA	43.75	42.857	NA	NA	NA	NA	100	30	NA	NA	NA	NA	NA	NA	NA	NA	NA	NA	NA	NA	NA	NA	NA	NA	NA	NA	NA	NA
chr11:126276066-126276367/+	NA	NA	10.692	0.268	NA	NA	NA	NA	11.628	0	NA	NA	NA	NA	NA	NA	NA	NA	NA	NA	NA	NA	NA	NA	NA	NA	NA	NA	NA	NA
chr11:128354966-128355963/-	NA	NA	NA	NA	4.854	2.102	NA	NA	NA	NA	NA	NA	NA	NA	NA	NA	NA	NA	NA	NA	7.048	1.02	NA	NA	NA	NA	NA	NA	NA	NA
chr11:128356041-128359184/-	NA	NA	NA	NA	11.485	1.887	NA	NA	NA	NA	NA	NA	NA	NA	NA	NA	NA	NA	NA	NA	NA	NA	NA	NA	NA	NA	NA	NA	NA	NA
chr11:128359385-128360351/-	NA	NA	NA	NA	17.021	0.671	NA	NA	NA	NA	NA	NA	NA	NA	NA	NA	NA	NA	NA	NA	NA	NA	NA	NA	NA	NA	NA	NA	NA	NA
chr11:128638167-128642676/+	NA	NA	NA	NA	NA	NA	NA	NA	NA	NA	NA	NA	NA	NA	NA	NA	NA	NA	NA	NA	3.16	0.627	NA	NA	NA	NA	NA	NA	NA	NA
chr11:128642880-128651852/+	NA	NA	NA	NA	NA	NA	NA	NA	NA	NA	NA	NA	NA	NA	NA	NA	NA	NA	NA	NA	5.474	0.379	NA	NA	NA	NA	NA	NA	NA	NA
chr11:12901389-12902551/+	16.496	1.087	NA	NA	NA	NA	NA	NA	NA	NA	6.012	0.171	NA	NA	NA	NA	NA	NA	NA	NA	NA	NA	NA	NA	NA	NA	NA	NA	NA	NA
chr11:12902598-12903442/+	4.803	0.383	NA	NA	NA	NA	NA	NA	NA	NA	2.033	0.125	NA	NA	NA	NA	NA	NA	NA	NA	NA	NA	NA	NA	NA	NA	NA	NA	NA	NA
chr11:12903504-12904547/+	3.03	0	NA	NA	NA	NA	NA	NA	NA	NA	1.323	0.145	NA	NA	NA	NA	NA	NA	NA	NA	NA	NA	NA	NA	NA	NA	NA	NA	NA	NA
chr11:12904672-12923486/+	NA	NA	NA	NA	NA	NA	NA	NA	NA	NA	1.538	0.11	NA	NA	NA	NA	NA	NA	NA	NA	NA	NA	NA	NA	NA	NA	NA	NA	NA	NA
chr11:130780032-130780164/-	NA	NA	NA	NA	NA	NA	NA	NA	NA	NA	6.623	0.683	NA	NA	NA	NA	NA	NA	NA	NA	NA	NA	NA	NA	NA	NA	NA	NA	NA	NA
chr11:134048636-134048716/-	3.456	0.23	NA	NA	NA	NA	NA	NA	NA	NA	NA	NA	NA	NA	NA	NA	NA	NA	NA	NA	NA	NA	NA	NA	NA	NA	NA	NA	NA	NA
chr11:134126542-134126981/+	NA	NA	NA	NA	21.569	14.286	NA	NA	NA	NA	NA	NA	NA	NA	NA	NA	34.959	7.547	NA	NA	NA	NA	NA	NA	NA	NA	NA	NA	NA	NA
chr11:134128518-134128901/+	NA	NA	NA	NA	13.934	6.87	NA	NA	NA	NA	NA	NA	NA	NA	NA	NA	17.045	8.07	NA	NA	NA	NA	NA	NA	NA	NA	NA	NA	NA	NA
chr11:14490406-14490881/-	NA	NA	NA	NA	NA	NA	NA	NA	NA	NA	7.692	0	NA	NA	NA	NA	NA	NA	NA	NA	NA	NA	NA	NA	NA	NA	NA	NA	NA	NA
chr11:14808231-14810651/+	NA	NA	NA	NA	NA	NA	NA	NA	NA	NA	NA	NA	NA	NA	NA	NA	NA	NA	NA	NA	NA	NA	NA	NA	23.81	5.66	NA	NA	NA	NA
chr11:17156576-17156657/-	NA	NA	NA	NA	NA	NA	20	11.888	NA	NA	NA	NA	NA	NA	NA	NA	NA	NA	NA	NA	NA	NA	NA	NA	30.667	7.065	NA	NA	NA	NA
chr11:17156706-17158028/-	NA	NA	NA	NA	NA	NA	NA	NA	NA	NA	NA	NA	NA	NA	NA	NA	NA	NA	NA	NA	NA	NA	NA	NA	23.967	8.586	NA	NA	NA	NA
chr11:17167278-17167409/-	NA	NA	NA	NA	9.489	0	NA	NA	NA	NA	NA	NA	NA	NA	NA	NA	NA	NA	NA	NA	NA	NA	NA	NA	13.364	0.193	NA	NA	NA	NA
chr11:17167489-17169063/-	NA	NA	NA	NA	NA	NA	2.638	1.6	NA	NA	NA	NA	NA	NA	NA	NA	NA	NA	NA	NA	NA	NA	NA	NA	NA	NA	NA	NA	NA	NA
chr11:1780869-1782538/-	NA	NA	NA	NA	NA	NA	NA	NA	1.444	0.117	NA	NA	NA	NA	NA	NA	NA	NA	NA	NA	NA	NA	NA	NA	NA	NA	NA	NA	NA	NA
chr11:20071447-20072834/+	NA	NA	NA	NA	15.309	2.041	NA	NA	NA	NA	NA	NA	NA	NA	NA	NA	NA	NA	NA	NA	NA	NA	NA	NA	NA	NA	NA	NA	NA	NA
chr11:20075786-20077314/+	NA	NA	NA	NA	3.472	1.274	NA	NA	NA	NA	NA	NA	NA	NA	NA	NA	NA	NA	NA	NA	NA	NA	NA	NA	NA	NA	NA	NA	NA	NA
chr11:20077503-20078075/+	NA	NA	NA	NA	75.439	39.13	NA	NA	NA	NA	NA	NA	NA	NA	NA	NA	NA	NA	NA	NA	NA	NA	NA	NA	NA	NA	NA	NA	NA	NA
chr11:20078174-20083852/+	NA	NA	NA	NA	86.813	42.857	NA	NA	NA	NA	NA	NA	NA	NA	NA	NA	NA	NA	NA	NA	NA	NA	NA	NA	NA	NA	NA	NA	NA	NA
chr11:20083905-20089731/+	NA	NA	NA	NA	6.395	1.351	NA	NA	NA	NA	NA	NA	NA	NA	NA	NA	NA	NA	NA	NA	NA	NA	NA	NA	NA	NA	NA	NA	NA	NA
chr11:20089755-20089869/+	NA	NA	NA	NA	NA	NA	NA	NA	NA	NA	13.924	0	NA	NA	NA	NA	NA	NA	NA	NA	NA	NA	NA	NA	NA	NA	NA	NA	NA	NA
chr11:20089944-20099097/+	NA	NA	NA	NA	27.723	1.205	NA	NA	NA	NA	NA	NA	NA	NA	NA	NA	NA	NA	NA	NA	NA	NA	NA	NA	NA	NA	NA	NA	NA	NA
chr11:20099650-20101609/+	14	3.704	10.092	0	NA	NA	NA	NA	NA	NA	NA	NA	NA	NA	NA	NA	NA	NA	NA	NA	NA	NA	NA	NA	NA	NA	NA	NA	NA	NA
chr11:20113914-20114644/+	NA	NA	NA	NA	NA	NA	NA	NA	NA	NA	42.424	5	NA	NA	NA	NA	NA	NA	NA	NA	NA	NA	NA	NA	NA	NA	NA	NA	NA	NA
chr11:20122718-20124800/+	NA	NA	NA	NA	NA	NA	NA	NA	NA	NA	8.182	4.587	NA	NA	NA	NA	NA	NA	NA	NA	NA	NA	NA	NA	NA	NA	NA	NA	NA	NA
chr11:20124955-20125198/+	NA	NA	NA	NA	NA	NA	NA	NA	NA	NA	3.704	2.913	NA	NA	NA	NA	NA	NA	NA	NA	NA	NA	NA	NA	NA	NA	NA	NA	NA	NA
chr11:20125270-20127076/+	NA	NA	NA	NA	NA	NA	NA	NA	NA	NA	12.621	1.887	NA	NA	NA	NA	NA	NA	NA	NA	NA	NA	NA	NA	NA	NA	NA	NA	NA	NA
chr11:20424530-20429456/+	NA	NA	NA	NA	NA	NA	8.714	0.69	NA	NA	NA	NA	NA	NA	NA	NA	NA	NA	NA	NA	NA	NA	NA	NA	NA	NA	NA	NA	NA	NA
chr11:230552-232982/-	NA	NA	10.112	7.143	NA	NA	NA	NA	NA	NA	NA	NA	NA	NA	NA	NA	NA	NA	NA	NA	NA	NA	NA	NA	NA	NA	NA	NA	NA	NA
chr11:27395223-27395521/-	NA	NA	NA	NA	NA	NA	NA	NA	NA	NA	NA	NA	NA	NA	7.853	0.175	NA	NA	NA	NA	NA	NA	NA	NA	NA	NA	NA	NA	NA	NA
chr11:27405954-27406799/-	1.756	0.102	NA	NA	NA	NA	NA	NA	NA	NA	NA	NA	NA	NA	NA	NA	NA	NA	NA	NA	NA	NA	NA	NA	NA	NA	NA	NA	NA	NA
chr11:28232745-28311752/+	6.601	0.84	NA	NA	NA	NA	NA	NA	NA	NA	7.568	0	NA	NA	NA	NA	NA	NA	NA	NA	NA	NA	NA	NA	NA	NA	NA	NA	NA	NA
chr11:2976996-2979628/-	NA	NA	NA	NA	NA	NA	4.04	1.058	NA	NA	NA	NA	NA	NA	NA	NA	NA	NA	NA	NA	NA	NA	NA	NA	NA	NA	NA	NA	NA	NA
chr11:2981139-2985909/-	12.264	0.402	NA	NA	NA	NA	NA	NA	NA	NA	NA	NA	NA	NA	NA	NA	NA	NA	NA	NA	NA	NA	NA	NA	NA	NA	NA	NA	NA	NA
chr11:2999572-3000436/-	NA	NA	NA	NA	NA	NA	NA	NA	NA	NA	NA	NA	NA	NA	NA	NA	NA	NA	NA	NA	1.899	1.124	NA	NA	NA	NA	NA	NA	NA	NA
chr11:3039770-3039849/-	NA	NA	80.645	27.273	NA	NA	NA	NA	NA	NA	NA	NA	NA	NA	NA	NA	NA	NA	NA	NA	NA	NA	NA	NA	NA	NA	NA	NA	NA	NA
chr11:3143328-3143577/-	NA	NA	9.787	0	NA	NA	NA	NA	NA	NA	NA	NA	NA	NA	NA	NA	NA	NA	NA	NA	NA	NA	NA	NA	NA	NA	NA	NA	NA	NA
chr11:31484852-31491286/-	NA	NA	NA	NA	NA	NA	25.51	7.692	NA	NA	NA	NA	NA	NA	NA	NA	NA	NA	NA	NA	NA	NA	NA	NA	NA	NA	NA	NA	NA	NA
chr11:32610278-32610557/+	NA	NA	NA	NA	NA	NA	2.301	0.498	NA	NA	NA	NA	NA	NA	NA	NA	NA	NA	NA	NA	NA	NA	NA	NA	NA	NA	NA	NA	NA	NA
chr11:32610681-32611092/+	NA	NA	NA	NA	4.145	0.184	NA	NA	NA	NA	NA	NA	NA	NA	NA	NA	NA	NA	NA	NA	NA	NA	NA	NA	NA	NA	NA	NA	NA	NA
chr11:33369299-33369397/+	1.367	0	NA	NA	NA	NA	NA	NA	NA	NA	NA	NA	NA	NA	NA	NA	NA	NA	NA	NA	NA	NA	NA	NA	NA	NA	NA	NA	NA	NA
chr11:33370364-33370692/+	4.698	2.55	NA	NA	NA	NA	NA	NA	NA	NA	NA	NA	NA	NA	NA	NA	NA	NA	NA	NA	NA	NA	NA	NA	NA	NA	NA	NA	NA	NA
chr11:34098021-34098106/+	NA	NA	NA	NA	1.52	0.1	0.771	0.058	NA	NA	NA	NA	NA	NA	NA	NA	NA	NA	NA	NA	NA	NA	NA	NA	NA	NA	NA	NA	NA	NA
chr11:34104424-34104501/+	0.607	0.402	NA	NA	NA	NA	NA	NA	NA	NA	NA	NA	NA	NA	0.552	0.132	NA	NA	NA	NA	NA	NA	NA	NA	NA	NA	NA	NA	NA	NA
chr11:34107766-34107851/+	NA	NA	1.551	0.642	NA	NA	2.097	1.434	NA	NA	NA	NA	1.818	0.3	1.119	0.093	1.099	0.064	NA	NA	1.152	0.101	NA	NA	NA	NA	NA	NA	NA	NA
chr11:34155967-34156058/+	NA	NA	NA	NA	NA	NA	NA	NA	1.471	0.268	NA	NA	NA	NA	NA	NA	NA	NA	NA	NA	NA	NA	NA	NA	NA	NA	NA	NA	41.667	0.375
chr11:34156133-34156721/+	NA	NA	NA	NA	NA	NA	NA	NA	5.133	2.73	NA	NA	NA	NA	NA	NA	NA	NA	NA	NA	NA	NA	NA	NA	NA	NA	NA	NA	NA	NA
chr11:34478364-34482797/+	NA	NA	NA	NA	NA	NA	4.482	2.821	NA	NA	NA	NA	NA	NA	NA	NA	NA	NA	NA	NA	NA	NA	NA	NA	NA	NA	NA	NA	NA	NA
chr11:35222742-35223214/+	NA	NA	NA	NA	NA	NA	NA	NA	NA	NA	NA	NA	NA	NA	25.33	12.611	NA	NA	NA	NA	NA	NA	NA	NA	NA	NA	NA	NA	NA	NA
chr11:35223334-35226058/+	NA	NA	NA	NA	NA	NA	NA	NA	NA	NA	NA	NA	NA	NA	2.608	0.465	NA	NA	NA	NA	NA	NA	NA	NA	NA	NA	NA	NA	NA	NA
chr11:35226187-35227658/+	NA	NA	NA	NA	NA	NA	NA	NA	NA	NA	NA	NA	NA	NA	4.323	1.393	NA	NA	NA	NA	NA	NA	NA	NA	NA	NA	NA	NA	NA	NA
chr11:35227790-35229651/+	NA	NA	NA	NA	NA	NA	NA	NA	NA	NA	70.37	31.034	NA	NA	2.725	0.316	NA	NA	NA	NA	NA	NA	NA	NA	NA	NA	NA	NA	NA	NA
chr11:35236461-35240862/+	NA	NA	NA	NA	NA	NA	NA	NA	NA	NA	NA	NA	NA	NA	NA	NA	NA	NA	0.351	0.085	NA	NA	NA	NA	NA	NA	NA	NA	NA	NA
chr11:36297790-36298638/-	NA	NA	7.03	1.691	NA	NA	NA	NA	NA	NA	NA	NA	NA	NA	NA	NA	NA	NA	NA	NA	NA	NA	NA	NA	NA	NA	NA	NA	NA	NA
chr11:36300166-36302261/-	NA	NA	NA	NA	6.485	0.498	NA	NA	NA	NA	NA	NA	NA	NA	NA	NA	NA	NA	NA	NA	NA	NA	NA	NA	NA	NA	NA	NA	NA	NA
chr11:3724122-3726429/-	NA	NA	NA	NA	NA	NA	NA	NA	NA	NA	NA	NA	NA	NA	NA	NA	3.182	1.754	NA	NA	NA	NA	NA	NA	NA	NA	NA	NA	NA	NA
chr11:43348161-43349338/+	2.392	2.242	NA	NA	NA	NA	NA	NA	NA	NA	NA	NA	NA	NA	NA	NA	NA	NA	NA	NA	NA	NA	NA	NA	NA	NA	NA	NA	NA	NA
chr11:43351608-43352057/+	NA	NA	NA	NA	NA	NA	6.024	3.885	NA	NA	NA	NA	NA	NA	NA	NA	NA	NA	NA	NA	NA	NA	NA	NA	NA	NA	NA	NA	NA	NA
chr11:43413502-43418258/+	NA	NA	NA	NA	NA	NA	12.676	6.703	NA	NA	NA	NA	NA	NA	NA	NA	NA	NA	NA	NA	NA	NA	NA	NA	NA	NA	NA	NA	NA	NA
chr11:43419041-43419523/+	NA	NA	NA	NA	NA	NA	NA	NA	NA	NA	9.855	0.333	NA	NA	NA	NA	NA	NA	NA	NA	NA	NA	NA	NA	NA	NA	NA	NA	NA	NA
chr11:43427179-43427335/+	14.094	1.099	8.883	0.772	NA	NA	12.387	1.923	NA	NA	11.009	0.452	NA	NA	NA	NA	7.692	0	NA	NA	NA	NA	NA	NA	NA	NA	NA	NA	NA	NA
chr11:43469672-43471631/+	14.869	2.456	NA	NA	NA	NA	17.483	2.041	7.393	0.352	NA	NA	NA	NA	NA	NA	NA	NA	NA	NA	NA	NA	NA	NA	NA	NA	NA	NA	NA	NA
chr11:45937119-45937253/-	NA	NA	NA	NA	NA	NA	NA	NA	18.919	2.273	NA	NA	NA	NA	NA	NA	NA	NA	NA	NA	NA	NA	NA	NA	NA	NA	NA	NA	NA	NA
chr11:46332740-46333875/+	NA	NA	NA	NA	NA	NA	NA	NA	NA	NA	2.262	0.893	NA	NA	NA	NA	NA	NA	NA	NA	NA	NA	NA	NA	NA	NA	NA	NA	NA	NA
chr11:46455178-46456398/-	NA	NA	4.732	2.857	NA	NA	37.662	1.333	NA	NA	NA	NA	NA	NA	NA	NA	NA	NA	NA	NA	NA	NA	NA	NA	NA	NA	NA	NA	NA	NA
chr11:46515258-46515673/-	NA	NA	0.543	0.513	NA	NA	NA	NA	NA	NA	NA	NA	NA	NA	NA	NA	NA	NA	NA	NA	NA	NA	NA	NA	NA	NA	NA	NA	NA	NA
chr11:46564948-46565524/-	NA	NA	NA	NA	3.42	0.208	NA	NA	NA	NA	NA	NA	NA	NA	NA	NA	NA	NA	NA	NA	NA	NA	NA	NA	NA	NA	NA	NA	NA	NA
chr11:46780593-46780818/-	NA	NA	NA	NA	NA	NA	1.166	0.429	NA	NA	NA	NA	NA	NA	NA	NA	NA	NA	NA	NA	NA	NA	NA	NA	NA	NA	NA	NA	NA	NA
chr11:46783743-46784176/-	NA	NA	NA	NA	1.632	1.149	NA	NA	NA	NA	NA	NA	NA	NA	4.895	0.989	NA	NA	NA	NA	NA	NA	NA	NA	NA	NA	NA	NA	NA	NA
chr11:46840054-46842725/-	NA	NA	NA	NA	NA	NA	NA	NA	NA	NA	NA	NA	NA	NA	NA	NA	NA	NA	NA	NA	NA	NA	NA	NA	6.25	0.111	NA	NA	NA	NA
chr11:47176812-47178573/+	NA	NA	17.887	2.881	NA	NA	NA	NA	NA	NA	NA	NA	NA	NA	NA	NA	NA	NA	NA	NA	NA	NA	NA	NA	NA	NA	NA	NA	NA	NA
chr11:47179473-47182677/+	NA	NA	35.802	12.994	NA	NA	NA	NA	NA	NA	NA	NA	NA	NA	NA	NA	NA	NA	NA	NA	NA	NA	NA	NA	NA	NA	NA	NA	NA	NA
chr11:47187937-47188056/-	NA	NA	NA	NA	NA	NA	1.747	0.452	NA	NA	NA	NA	NA	NA	NA	NA	NA	NA	NA	NA	NA	NA	NA	NA	NA	NA	NA	NA	NA	NA
chr11:47188150-47188310/-	NA	NA	NA	NA	NA	NA	NA	NA	35.052	4.186	NA	NA	NA	NA	NA	NA	NA	NA	NA	NA	NA	NA	NA	NA	NA	NA	NA	NA	NA	NA
chr11:47189594-47189673/-	11.278	2.473	20.287	9.854	NA	NA	NA	NA	34.524	6.564	NA	NA	21.008	1.938	NA	NA	NA	NA	NA	NA	NA	NA	NA	NA	NA	NA	NA	NA	NA	NA
chr11:47193351-47193831/-	NA	NA	NA	NA	NA	NA	NA	NA	54.545	3.106	NA	NA	37.143	2.899	NA	NA	NA	NA	NA	NA	NA	NA	NA	NA	NA	NA	NA	NA	NA	NA
chr11:47195033-47195309/-	NA	NA	NA	NA	NA	NA	NA	NA	39.2	4.124	NA	NA	NA	NA	NA	NA	NA	NA	NA	NA	NA	NA	NA	NA	NA	NA	NA	NA	NA	NA
chr11:47256223-47256307/+	NA	NA	26.108	4.361	NA	NA	NA	NA	NA	NA	NA	NA	15.118	5.335	NA	NA	NA	NA	NA	NA	NA	NA	NA	NA	NA	NA	NA	NA	NA	NA
chr11:47256485-47256820/+	NA	NA	6.394	5.59	NA	NA	NA	NA	NA	NA	NA	NA	14.601	12.745	NA	NA	NA	NA	NA	NA	NA	NA	NA	NA	NA	NA	NA	NA	NA	NA
chr11:47259552-47259688/+	NA	NA	12.838	2.555	NA	NA	NA	NA	NA	NA	NA	NA	NA	NA	NA	NA	NA	NA	NA	NA	NA	NA	NA	NA	NA	NA	NA	NA	NA	NA
chr11:47283000-47283097/+	NA	NA	NA	NA	NA	NA	NA	NA	15.745	7.813	29.897	9.859	NA	NA	NA	NA	NA	NA	NA	NA	NA	NA	NA	NA	NA	NA	NA	NA	NA	NA
chr11:47297753-47298282/+	NA	NA	NA	NA	2.338	0.606	NA	NA	NA	NA	NA	NA	NA	NA	NA	NA	NA	NA	NA	NA	NA	NA	NA	NA	NA	NA	NA	NA	NA	NA
chr11:47306745-47307001/+	NA	NA	14.697	2.899	NA	NA	NA	NA	NA	NA	NA	NA	NA	NA	NA	NA	NA	NA	NA	NA	NA	NA	NA	NA	NA	NA	NA	NA	NA	NA
chr11:47307141-47307983/+	NA	NA	14.243	3.226	NA	NA	NA	NA	NA	NA	NA	NA	NA	NA	NA	NA	NA	NA	NA	NA	NA	NA	NA	NA	NA	NA	NA	NA	NA	NA
chr11:47308085-47310518/+	NA	NA	92.683	33.333	NA	NA	NA	NA	NA	NA	NA	NA	NA	NA	NA	NA	NA	NA	NA	NA	NA	NA	NA	NA	NA	NA	NA	NA	NA	NA
chr11:47311044-47311417/+	NA	NA	3.514	0.99	NA	NA	NA	NA	NA	NA	NA	NA	NA	NA	NA	NA	NA	NA	NA	NA	NA	NA	NA	NA	NA	NA	NA	NA	NA	NA
chr11:47311604-47311699/+	NA	NA	NA	NA	9.884	0.529	NA	NA	NA	NA	NA	NA	NA	NA	NA	NA	NA	NA	NA	NA	NA	NA	NA	NA	NA	NA	NA	NA	NA	NA
chr11:47314147-47315433/+	NA	NA	100	10	NA	NA	NA	NA	NA	NA	NA	NA	NA	NA	NA	NA	NA	NA	NA	NA	NA	NA	NA	NA	NA	NA	NA	NA	NA	NA
chr11:47498977-47500428/-	4.734	1.474	NA	NA	NA	NA	8.333	3.325	8.041	2.019	5.751	1.984	NA	NA	NA	NA	NA	NA	NA	NA	NA	NA	NA	NA	NA	NA	NA	NA	NA	NA
chr11:47504408-47505004/-	NA	NA	NA	NA	1.213	0.337	NA	NA	NA	NA	NA	NA	NA	NA	NA	NA	NA	NA	NA	NA	NA	NA	NA	NA	NA	NA	NA	NA	NA	NA
chr11:47521156-47522412/-	NA	NA	NA	NA	22.222	10.526	NA	NA	NA	NA	NA	NA	NA	NA	NA	NA	NA	NA	NA	NA	NA	NA	NA	NA	NA	NA	NA	NA	NA	NA
chr11:47602174-47602386/+	NA	NA	NA	NA	5.747	5.216	NA	NA	NA	NA	NA	NA	NA	NA	NA	NA	NA	NA	NA	NA	NA	NA	NA	NA	NA	NA	NA	NA	NA	NA
chr11:47603765-47603900/+	NA	NA	NA	NA	5.734	2.007	NA	NA	NA	NA	NA	NA	NA	NA	NA	NA	NA	NA	NA	NA	NA	NA	NA	NA	NA	NA	NA	NA	NA	NA
chr11:47647293-47648631/-	NA	NA	2.243	1.313	NA	NA	5.814	1.903	NA	NA	NA	NA	NA	NA	NA	NA	NA	NA	NA	NA	NA	NA	NA	NA	NA	NA	NA	NA	NA	NA
chr11:47746330-47752925/-	NA	NA	NA	NA	NA	NA	NA	NA	NA	NA	NA	NA	NA	NA	NA	NA	NA	NA	NA	NA	NA	NA	NA	NA	57.143	28.947	NA	NA	NA	NA
chr11:47753113-47753668/-	NA	NA	NA	NA	41.935	40.196	NA	NA	NA	NA	NA	NA	NA	NA	83.333	39.394	NA	NA	NA	NA	NA	NA	NA	NA	NA	NA	NA	NA	NA	NA
chr11:47753771-47754088/-	NA	NA	NA	NA	91.753	72.308	NA	NA	NA	NA	NA	NA	NA	NA	NA	NA	NA	NA	82.143	63.636	NA	NA	NA	NA	64.103	58.904	NA	NA	NA	NA
chr11:47774654-47776079/-	NA	NA	NA	NA	NA	NA	NA	NA	NA	NA	NA	NA	4.466	1.012	NA	NA	NA	NA	NA	NA	NA	NA	NA	NA	NA	NA	NA	NA	NA	NA
chr11:47819436-47819529/-	NA	NA	NA	NA	NA	NA	NA	NA	NA	NA	NA	NA	4.778	0.288	NA	NA	NA	NA	NA	NA	NA	NA	NA	NA	NA	NA	NA	NA	NA	NA
chr11:47819814-47819919/-	NA	NA	NA	NA	NA	NA	1.004	0.134	NA	NA	NA	NA	NA	NA	NA	NA	NA	NA	NA	NA	NA	NA	NA	NA	NA	NA	NA	NA	NA	NA
chr11:57182204-57182405/-	NA	NA	NA	NA	NA	NA	NA	NA	NA	NA	NA	NA	1.425	0.348	NA	NA	NA	NA	NA	NA	NA	NA	NA	NA	NA	NA	NA	NA	NA	NA
chr11:57182579-57184045/-	NA	NA	NA	NA	NA	NA	NA	NA	NA	NA	NA	NA	8.152	6.667	NA	NA	NA	NA	NA	NA	NA	NA	NA	NA	NA	NA	NA	NA	NA	NA
chr11:57193182-57193461/-	NA	NA	NA	NA	NA	NA	NA	NA	NA	NA	NA	NA	70.992	27.273	NA	NA	NA	NA	NA	NA	NA	NA	NA	NA	NA	NA	NA	NA	NA	NA
chr11:57254691-57256388/-	NA	NA	2.526	0	NA	NA	NA	NA	NA	NA	NA	NA	NA	NA	NA	NA	NA	NA	NA	NA	NA	NA	NA	NA	NA	NA	NA	NA	NA	NA
chr11:57258835-57259063/-	NA	NA	NA	NA	NA	NA	NA	NA	NA	NA	NA	NA	NA	NA	NA	NA	9.977	1.665	NA	NA	NA	NA	NA	NA	NA	NA	NA	NA	NA	NA
chr11:581606-581961/+	NA	NA	NA	NA	NA	NA	NA	NA	60	9.804	NA	NA	NA	NA	NA	NA	NA	NA	NA	NA	NA	NA	NA	NA	NA	NA	NA	NA	NA	NA
chr11:58317340-58317445/-	NA	NA	14.729	0	NA	NA	NA	NA	NA	NA	11.284	1	11.05	0.274	NA	NA	NA	NA	NA	NA	NA	NA	NA	NA	NA	NA	NA	NA	NA	NA
chr11:58317619-58318537/-	NA	NA	10.112	2.703	NA	NA	NA	NA	NA	NA	6.446	0.258	12.274	1.372	NA	NA	NA	NA	NA	NA	NA	NA	NA	NA	NA	NA	NA	NA	NA	NA
chr11:60665743-60666012/-	NA	NA	12.766	1.724	NA	NA	NA	NA	NA	NA	NA	NA	NA	NA	NA	NA	NA	NA	NA	NA	NA	NA	NA	NA	NA	NA	NA	NA	NA	NA
chr11:60669012-60669874/-	NA	NA	26.409	5.699	NA	NA	NA	NA	NA	NA	NA	NA	NA	NA	NA	NA	NA	NA	NA	NA	NA	NA	NA	NA	NA	NA	NA	NA	NA	NA
chr11:60670128-60670211/-	NA	NA	17.34	0.457	NA	NA	NA	NA	NA	NA	NA	NA	NA	NA	NA	NA	NA	NA	NA	NA	NA	NA	NA	NA	NA	NA	NA	NA	NA	NA
chr11:61032510-61032593/-	NA	NA	NA	NA	NA	NA	NA	NA	16.062	5.263	NA	NA	NA	NA	NA	NA	NA	NA	NA	NA	NA	NA	NA	NA	NA	NA	NA	NA	NA	NA
chr11:61077890-61079255/-	NA	NA	NA	NA	NA	NA	1.217	0.52	NA	NA	NA	NA	NA	NA	NA	NA	NA	NA	NA	NA	NA	NA	NA	NA	NA	NA	NA	NA	NA	NA
chr11:61079367-61079460/-	NA	NA	0.571	0.172	NA	NA	NA	NA	NA	NA	NA	NA	NA	NA	NA	NA	NA	NA	NA	NA	NA	NA	NA	NA	NA	NA	NA	NA	NA	NA
chr11:61081178-61081333/-	NA	NA	NA	NA	NA	NA	0.584	0.513	NA	NA	NA	NA	NA	NA	NA	NA	NA	NA	NA	NA	NA	NA	NA	NA	NA	NA	NA	NA	NA	NA
chr11:61081958-61083756/-	NA	NA	NA	NA	NA	NA	0.647	0.53	0.77	0.289	NA	NA	NA	NA	NA	NA	NA	NA	NA	NA	NA	NA	NA	NA	NA	NA	NA	NA	NA	NA
chr11:61089169-61089767/-	0.494	0	NA	NA	NA	NA	NA	NA	NA	NA	NA	NA	NA	NA	NA	NA	NA	NA	NA	NA	NA	NA	NA	NA	NA	NA	NA	NA	NA	NA
chr11:61089884-61090482/-	0.71	0.258	NA	NA	NA	NA	NA	NA	0.802	0.393	NA	NA	NA	NA	NA	NA	NA	NA	NA	NA	1.715	0.254	NA	NA	NA	NA	NA	NA	NA	NA
chr11:61090566-61091450/-	0.677	0.256	NA	NA	NA	NA	NA	NA	0.926	0.208	NA	NA	NA	NA	NA	NA	NA	NA	NA	NA	NA	NA	NA	NA	NA	NA	NA	NA	NA	NA
chr11:61091609-61093082/-	NA	NA	NA	NA	NA	NA	2.732	0.883	NA	NA	NA	NA	NA	NA	NA	NA	NA	NA	NA	NA	NA	NA	NA	NA	NA	NA	NA	NA	NA	NA
chr11:61109967-61110045/+	NA	NA	7.338	3.784	NA	NA	NA	NA	NA	NA	NA	NA	NA	NA	NA	NA	NA	NA	NA	NA	NA	NA	NA	NA	NA	NA	NA	NA	NA	NA
chr11:61120611-61121255/-	NA	NA	NA	NA	5.219	4.032	NA	NA	NA	NA	NA	NA	NA	NA	NA	NA	NA	NA	NA	NA	NA	NA	NA	NA	NA	NA	NA	NA	NA	NA
chr11:61133688-61135394/+	9.14	3.308	11.31	3.187	21.795	9.761	NA	NA	NA	NA	NA	NA	29.843	13.609	NA	NA	11.837	10.456	24.706	5.077	16.429	10.577	NA	NA	58.974	18.563	NA	NA	NA	NA
chr11:61187566-61187941/-	5.556	0.444	NA	NA	NA	NA	NA	NA	NA	NA	NA	NA	NA	NA	NA	NA	NA	NA	NA	NA	NA	NA	NA	NA	NA	NA	NA	NA	NA	NA
chr11:61188045-61188861/-	8.986	2.687	NA	NA	11.628	6.625	NA	NA	NA	NA	NA	NA	NA	NA	NA	NA	NA	NA	NA	NA	NA	NA	NA	NA	NA	NA	NA	NA	NA	NA
chr11:61570398-61570503/-	NA	NA	0.391	0.251	NA	NA	0.388	0.225	NA	NA	NA	NA	NA	NA	NA	NA	NA	NA	NA	NA	NA	NA	NA	NA	NA	NA	NA	NA	NA	NA
chr11:61571239-61572156/-	NA	NA	1.105	0.366	NA	NA	1.111	0.68	1.991	0.499	NA	NA	NA	NA	NA	NA	NA	NA	NA	NA	NA	NA	NA	NA	NA	NA	NA	NA	NA	NA
chr11:61572233-61574135/-	NA	NA	1.352	0.259	NA	NA	0.858	0.421	1.918	0.196	NA	NA	NA	NA	NA	NA	NA	NA	NA	NA	NA	NA	NA	NA	NA	NA	NA	NA	NA	NA
chr11:61574196-61578222/-	NA	NA	NA	NA	NA	NA	NA	NA	NA	NA	NA	NA	NA	NA	NA	NA	1.525	0.263	NA	NA	NA	NA	NA	NA	NA	NA	NA	NA	NA	NA
chr11:61578351-61578445/-	0.519	0.252	0.927	0.043	NA	NA	NA	NA	NA	NA	NA	NA	NA	NA	NA	NA	NA	NA	NA	NA	NA	NA	NA	NA	NA	NA	NA	NA	NA	NA
chr11:61580140-61580714/-	NA	NA	1.991	0.111	NA	NA	NA	NA	0.948	0	NA	NA	NA	NA	NA	NA	NA	NA	NA	NA	NA	NA	NA	NA	NA	NA	NA	NA	NA	NA
chr11:61605360-61607805/+	NA	NA	NA	NA	NA	NA	NA	NA	NA	NA	NA	NA	0.93	0.272	NA	NA	NA	NA	NA	NA	NA	NA	NA	NA	NA	NA	NA	NA	NA	NA
chr11:61608003-61608095/+	NA	NA	NA	NA	NA	NA	NA	NA	NA	NA	NA	NA	2.219	0.216	NA	NA	NA	NA	NA	NA	NA	NA	NA	NA	NA	NA	NA	NA	NA	NA
chr11:61608197-61615630/+	NA	NA	NA	NA	NA	NA	NA	NA	NA	NA	NA	NA	1.282	0.292	NA	NA	NA	NA	NA	NA	NA	NA	NA	NA	NA	NA	NA	NA	NA	NA
chr11:61630541-61630753/+	NA	NA	0.404	0.13	NA	NA	NA	NA	NA	NA	NA	NA	NA	NA	NA	NA	NA	NA	NA	NA	NA	NA	NA	NA	NA	NA	NA	NA	NA	NA
chr11:61631258-61632623/+	NA	NA	NA	NA	NA	NA	NA	NA	NA	NA	NA	NA	0.865	0.203	NA	NA	NA	NA	NA	NA	NA	NA	NA	NA	NA	NA	NA	NA	NA	NA
chr11:62376124-62376207/-	NA	NA	19.298	6.667	NA	NA	NA	NA	NA	NA	NA	NA	NA	NA	NA	NA	NA	NA	NA	NA	NA	NA	NA	NA	NA	NA	NA	NA	NA	NA
chr11:62376949-62377100/-	NA	NA	11.45	7.317	NA	NA	NA	NA	NA	NA	NA	NA	NA	NA	NA	NA	NA	NA	NA	NA	NA	NA	NA	NA	NA	NA	NA	NA	NA	NA
chr11:62378819-62378896/-	NA	NA	26.923	9.091	NA	NA	NA	NA	NA	NA	NA	NA	NA	NA	NA	NA	NA	NA	NA	NA	NA	NA	NA	NA	NA	NA	NA	NA	NA	NA
chr11:62397156-62397285/-	NA	NA	0.272	0.184	NA	NA	NA	NA	NA	NA	NA	NA	NA	NA	NA	NA	NA	NA	NA	NA	NA	NA	NA	NA	NA	NA	NA	NA	NA	NA
chr11:62397429-62397668/-	NA	NA	1.353	0.528	NA	NA	NA	NA	NA	NA	NA	NA	NA	NA	NA	NA	NA	NA	NA	NA	NA	NA	NA	NA	NA	NA	NA	NA	NA	NA
chr11:62397748-62397850/-	NA	NA	0.478	0.22	NA	NA	NA	NA	NA	NA	NA	NA	NA	NA	NA	NA	NA	NA	NA	NA	NA	NA	NA	NA	NA	NA	NA	NA	NA	NA
chr11:62397977-62398072/-	NA	NA	NA	NA	NA	NA	NA	NA	0.387	0.055	NA	NA	NA	NA	NA	NA	NA	NA	NA	NA	NA	NA	NA	NA	NA	NA	NA	NA	NA	NA
chr11:62400986-62401781/-	41.176	25.346	62.567	37.864	NA	NA	NA	NA	NA	NA	NA	NA	NA	NA	NA	NA	NA	NA	NA	NA	NA	NA	NA	NA	84	17.259	NA	NA	72.727	17.259
chr11:62401847-62402292/-	NA	NA	NA	NA	NA	NA	NA	NA	NA	NA	NA	NA	NA	NA	30.12	18.106	NA	NA	NA	NA	NA	NA	NA	NA	80.952	14.441	NA	NA	58.333	14.441
chr11:62406939-62407098/-	NA	NA	NA	NA	0.209	0.109	NA	NA	NA	NA	NA	NA	NA	NA	NA	NA	NA	NA	NA	NA	0.546	0.054	NA	NA	NA	NA	NA	NA	NA	NA
chr11:6243839-6244040/-	NA	NA	5.892	0	7.448	0.249	NA	NA	NA	NA	NA	NA	NA	NA	NA	NA	NA	NA	NA	NA	NA	NA	NA	NA	NA	NA	NA	NA	NA	NA
chr11:6244127-6244309/-	NA	NA	10.432	0	6.835	1.416	NA	NA	NA	NA	NA	NA	NA	NA	NA	NA	NA	NA	NA	NA	NA	NA	NA	NA	NA	NA	NA	NA	NA	NA
chr11:6245478-6245608/-	NA	NA	NA	NA	8.597	2.222	NA	NA	NA	NA	NA	NA	NA	NA	NA	NA	NA	NA	NA	NA	NA	NA	NA	NA	NA	NA	NA	NA	NA	NA
chr11:62483409-62484460/-	NA	NA	NA	NA	NA	NA	18.182	1.475	NA	NA	NA	NA	NA	NA	NA	NA	NA	NA	NA	NA	NA	NA	NA	NA	NA	NA	NA	NA	NA	NA
chr11:62484661-62487494/-	NA	NA	NA	NA	NA	NA	5.025	3.271	NA	NA	NA	NA	NA	NA	NA	NA	NA	NA	NA	NA	NA	NA	NA	NA	NA	NA	NA	NA	NA	NA
chr11:62491198-62491385/-	NA	NA	NA	NA	NA	NA	11.111	1.619	NA	NA	NA	NA	NA	NA	NA	NA	NA	NA	NA	NA	NA	NA	NA	NA	51.724	3.789	NA	NA	NA	NA
chr11:62491462-62491762/-	NA	NA	NA	NA	NA	NA	NA	NA	NA	NA	NA	NA	NA	NA	NA	NA	NA	NA	NA	NA	NA	NA	NA	NA	63.158	3.19	NA	NA	NA	NA
chr11:62549440-62549584/+	4.644	3.409	NA	NA	NA	NA	NA	NA	NA	NA	NA	NA	NA	NA	NA	NA	NA	NA	NA	NA	7.2	0.433	NA	NA	NA	NA	NA	NA	NA	NA
chr11:62549805-62550164/+	NA	NA	18.563	8.108	NA	NA	NA	NA	17.46	14.62	39.31	8.397	NA	NA	12	7.143	NA	NA	NA	NA	NA	NA	NA	NA	NA	NA	NA	NA	71.429	19.481
chr11:62594697-62594814/-	2.29	0.27	NA	NA	NA	NA	NA	NA	NA	NA	NA	NA	NA	NA	NA	NA	NA	NA	NA	NA	NA	NA	NA	NA	NA	NA	NA	NA	NA	NA
chr11:62621536-62621990/-	NA	NA	NA	NA	NA	NA	33.86	11.219	NA	NA	NA	NA	NA	NA	NA	NA	NA	NA	NA	NA	NA	NA	NA	NA	NA	NA	NA	NA	NA	NA
chr11:62622023-62622359/-	NA	NA	NA	NA	28.472	10.448	NA	NA	NA	NA	NA	NA	NA	NA	NA	NA	NA	NA	NA	NA	NA	NA	NA	NA	NA	NA	NA	NA	NA	NA
chr11:62622688-62622895/-	NA	NA	NA	NA	NA	NA	NA	NA	NA	NA	NA	NA	NA	NA	NA	NA	NA	NA	34.68	9.407	NA	NA	NA	NA	NA	NA	NA	NA	NA	NA
chr11:62648919-62649364/+	NA	NA	11.048	10.381	NA	NA	NA	NA	NA	NA	NA	NA	NA	NA	NA	NA	NA	NA	NA	NA	NA	NA	NA	NA	NA	NA	NA	NA	NA	NA
chr11:62650471-62651460/+	NA	NA	NA	NA	NA	NA	NA	NA	NA	NA	NA	NA	91.892	60.784	NA	NA	NA	NA	NA	NA	NA	NA	NA	NA	NA	NA	NA	NA	NA	NA
chr11:62651584-62651928/+	100	65.625	82.609	40.566	NA	NA	NA	NA	NA	NA	NA	NA	89.474	59.524	NA	NA	NA	NA	NA	NA	NA	NA	NA	NA	NA	NA	NA	NA	NA	NA
chr11:62651997-62652103/+	NA	NA	0.446	0.139	NA	NA	NA	NA	NA	NA	NA	NA	NA	NA	NA	NA	NA	NA	NA	NA	3.516	0.077	NA	NA	NA	NA	NA	NA	NA	NA
chr11:62653080-62655606/+	NA	NA	1.034	0.55	NA	NA	NA	NA	NA	NA	NA	NA	NA	NA	NA	NA	NA	NA	NA	NA	NA	NA	NA	NA	NA	NA	NA	NA	NA	NA
chr11:63585606-63585687/+	NA	NA	6.485	2.19	NA	NA	NA	NA	NA	NA	NA	NA	NA	NA	NA	NA	NA	NA	NA	NA	NA	NA	NA	NA	NA	NA	NA	NA	NA	NA
chr11:63586124-63586273/+	NA	NA	12.069	0	NA	NA	NA	NA	NA	NA	NA	NA	NA	NA	NA	NA	NA	NA	NA	NA	NA	NA	NA	NA	NA	NA	NA	NA	NA	NA
chr11:63719805-63719878/+	12.069	1.031	NA	NA	NA	NA	NA	NA	NA	NA	NA	NA	NA	NA	NA	NA	NA	NA	NA	NA	NA	NA	NA	NA	NA	NA	NA	NA	NA	NA
chr11:63964869-63964964/+	4.883	0.205	NA	NA	NA	NA	NA	NA	NA	NA	NA	NA	NA	NA	NA	NA	NA	NA	NA	NA	NA	NA	NA	NA	NA	NA	NA	NA	NA	NA
chr11:64012434-64012675/-	NA	NA	NA	NA	1.144	0.244	NA	NA	NA	NA	NA	NA	NA	NA	NA	NA	NA	NA	NA	NA	NA	NA	NA	NA	NA	NA	NA	NA	NA	NA
chr11:6422659-6422803/-	NA	NA	NA	NA	7.062	3.339	NA	NA	NA	NA	NA	NA	NA	NA	NA	NA	NA	NA	NA	NA	NA	NA	NA	NA	NA	NA	NA	NA	NA	NA
chr11:6423439-6423805/-	NA	NA	NA	NA	4.553	0.429	NA	NA	NA	NA	NA	NA	NA	NA	NA	NA	NA	NA	NA	NA	NA	NA	NA	NA	NA	NA	NA	NA	NA	NA
chr11:6423955-6424374/-	NA	NA	NA	NA	2.782	0.188	NA	NA	NA	NA	NA	NA	NA	NA	NA	NA	NA	NA	NA	NA	NA	NA	NA	NA	NA	NA	NA	NA	NA	NA
chr11:64536810-64536897/-	NA	NA	NA	NA	NA	NA	NA	NA	NA	NA	NA	NA	NA	NA	NA	NA	NA	NA	8.235	0.813	NA	NA	NA	NA	NA	NA	NA	NA	NA	NA
chr11:64537081-64537435/-	NA	NA	NA	NA	NA	NA	NA	NA	NA	NA	NA	NA	NA	NA	NA	NA	NA	NA	8.333	0	NA	NA	NA	NA	NA	NA	NA	NA	NA	NA
chr11:64673127-64673213/-	NA	NA	1.256	0	NA	NA	NA	NA	NA	NA	NA	NA	NA	NA	NA	NA	NA	NA	NA	NA	NA	NA	NA	NA	NA	NA	NA	NA	NA	NA
chr11:64675136-64675219/-	7.5	0	NA	NA	NA	NA	NA	NA	NA	NA	NA	NA	NA	NA	NA	NA	NA	NA	NA	NA	NA	NA	NA	NA	NA	NA	NA	NA	NA	NA
chr11:64854264-64854399/+	NA	NA	NA	NA	NA	NA	NA	NA	32.331	0.671	NA	NA	NA	NA	NA	NA	NA	NA	NA	NA	NA	NA	NA	NA	NA	NA	NA	NA	NA	NA
chr11:64950668-64950944/+	NA	NA	NA	NA	NA	NA	NA	NA	NA	NA	NA	NA	3.774	0	NA	NA	NA	NA	NA	NA	NA	NA	NA	NA	NA	NA	NA	NA	NA	NA
chr11:65062123-65063010/+	NA	NA	NA	NA	NA	NA	NA	NA	NA	NA	NA	NA	5.677	1.576	NA	NA	NA	NA	NA	NA	NA	NA	NA	NA	NA	NA	NA	NA	NA	NA
chr11:65063070-65063334/+	NA	NA	2.42	0.397	NA	NA	NA	NA	NA	NA	NA	NA	NA	NA	NA	NA	NA	NA	NA	NA	NA	NA	NA	NA	NA	NA	NA	NA	NA	NA
chr11:65167330-65168194/+	NA	NA	7.836	1.37	NA	NA	NA	NA	NA	NA	NA	NA	NA	NA	NA	NA	NA	NA	NA	NA	NA	NA	NA	NA	NA	NA	NA	NA	NA	NA
chr11:6518897-6519000/+	NA	NA	NA	NA	NA	NA	NA	NA	50	41.026	NA	NA	NA	NA	NA	NA	NA	NA	NA	NA	NA	NA	NA	NA	NA	NA	NA	NA	NA	NA
chr11:65318945-65319018/-	NA	NA	NA	NA	13.043	4.649	NA	NA	NA	NA	NA	NA	NA	NA	NA	NA	NA	NA	NA	NA	NA	NA	NA	NA	NA	NA	NA	NA	NA	NA
chr11:65373323-65373416/-	NA	NA	4.156	0	NA	NA	NA	NA	NA	NA	NA	NA	NA	NA	NA	NA	NA	NA	NA	NA	NA	NA	NA	NA	NA	NA	NA	NA	NA	NA
chr11:65373552-65374161/-	NA	NA	4.641	0	NA	NA	NA	NA	NA	NA	NA	NA	NA	NA	NA	NA	NA	NA	NA	NA	NA	NA	NA	NA	NA	NA	NA	NA	NA	NA
chr11:65375287-65375392/-	4.977	3.226	NA	NA	9.677	2.552	NA	NA	NA	NA	NA	NA	NA	NA	NA	NA	NA	NA	NA	NA	NA	NA	NA	NA	NA	NA	NA	NA	NA	NA
chr11:65375541-65375738/-	1.751	0.565	1.587	0.585	NA	NA	NA	NA	NA	NA	NA	NA	NA	NA	NA	NA	NA	NA	NA	NA	NA	NA	NA	NA	NA	NA	NA	NA	NA	NA
chr11:6541332-6541467/+	23.944	5	NA	NA	NA	NA	NA	NA	41.176	25	NA	NA	NA	NA	NA	NA	NA	NA	NA	NA	NA	NA	NA	NA	NA	NA	NA	NA	NA	NA
chr11:65417336-65417420/+	NA	NA	NA	NA	6.96	0.571	NA	NA	NA	NA	NA	NA	NA	NA	NA	NA	NA	NA	NA	NA	NA	NA	NA	NA	NA	NA	NA	NA	NA	NA
chr11:65423406-65425757/-	NA	NA	17.273	4.255	NA	NA	NA	NA	NA	NA	NA	NA	NA	NA	NA	NA	NA	NA	NA	NA	NA	NA	NA	NA	NA	NA	NA	NA	NA	NA
chr11:65427268-65427594/-	NA	NA	14.855	2.521	NA	NA	NA	NA	NA	NA	NA	NA	NA	NA	NA	NA	NA	NA	NA	NA	NA	NA	NA	NA	NA	NA	NA	NA	NA	NA
chr11:65629750-65629914/+	NA	NA	NA	NA	NA	NA	NA	NA	19.118	5.495	NA	NA	NA	NA	NA	NA	NA	NA	NA	NA	NA	NA	NA	NA	NA	NA	NA	NA	NA	NA
chr11:65638129-65638627/-	NA	NA	NA	NA	NA	NA	NA	NA	NA	NA	5.619	0.88	NA	NA	NA	NA	NA	NA	NA	NA	NA	NA	NA	NA	NA	NA	NA	NA	NA	NA
chr11:65638834-65639440/-	NA	NA	NA	NA	NA	NA	NA	NA	NA	NA	4.644	1.765	NA	NA	NA	NA	NA	NA	NA	NA	NA	NA	NA	NA	NA	NA	NA	NA	NA	NA
chr11:66133702-66133901/-	NA	NA	18.224	7.438	NA	NA	NA	NA	NA	NA	NA	NA	NA	NA	NA	NA	NA	NA	NA	NA	NA	NA	NA	NA	NA	NA	NA	NA	NA	NA
chr11:66134035-66134934/-	NA	NA	21.321	9.091	NA	NA	NA	NA	NA	NA	NA	NA	NA	NA	NA	NA	NA	NA	NA	NA	NA	NA	NA	NA	NA	NA	NA	NA	NA	NA
chr11:66288847-66290926/+	NA	NA	NA	NA	13.376	13.158	NA	NA	NA	NA	26.087	10.9	NA	NA	NA	NA	NA	NA	NA	NA	NA	NA	NA	NA	NA	NA	NA	NA	NA	NA
chr11:66291047-66291194/+	NA	NA	NA	NA	18.552	8.065	NA	NA	NA	NA	17.838	7.006	NA	NA	NA	NA	NA	NA	NA	NA	NA	NA	NA	NA	NA	NA	NA	NA	NA	NA
chr11:66407594-66410920/+	NA	NA	8.541	3.394	NA	NA	NA	NA	NA	NA	NA	NA	16.364	4.666	NA	NA	NA	NA	NA	NA	NA	NA	NA	NA	NA	NA	NA	NA	NA	NA
chr11:66526567-66555630/+	17.857	5.714	NA	NA	NA	NA	NA	NA	NA	NA	NA	NA	NA	NA	NA	NA	NA	NA	NA	NA	NA	NA	NA	NA	NA	NA	NA	NA	NA	NA
chr11:66581486-66583523/+	NA	NA	NA	NA	NA	NA	NA	NA	NA	NA	NA	NA	NA	NA	NA	NA	NA	NA	NA	NA	NA	NA	NA	NA	48.148	7.438	NA	NA	NA	NA
chr11:66982917-66983326/+	NA	NA	NA	NA	NA	NA	NA	NA	NA	NA	5.161	0	NA	NA	6.748	1.13	NA	NA	NA	NA	NA	NA	NA	NA	13.043	1.124	NA	NA	NA	NA
chr11:67012929-67013455/+	NA	NA	NA	NA	NA	NA	NA	NA	NA	NA	NA	NA	4.496	4.278	NA	NA	NA	NA	NA	NA	NA	NA	NA	NA	NA	NA	NA	NA	NA	NA
chr11:67067594-67068460/+	NA	NA	NA	NA	6.742	1.426	NA	NA	NA	NA	NA	NA	NA	NA	NA	NA	NA	NA	NA	NA	NA	NA	NA	NA	NA	NA	NA	NA	NA	NA
chr11:67161081-67161161/+	NA	NA	20	6.667	NA	NA	NA	NA	NA	NA	NA	NA	NA	NA	NA	NA	NA	NA	NA	NA	NA	NA	NA	NA	NA	NA	NA	NA	NA	NA
chr11:67199963-67200070/+	NA	NA	NA	NA	NA	NA	NA	NA	NA	NA	NA	NA	71.429	40	NA	NA	NA	NA	NA	NA	NA	NA	NA	NA	NA	NA	NA	NA	NA	NA
chr11:67200308-67200422/+	NA	NA	NA	NA	NA	NA	NA	NA	NA	NA	NA	NA	3.18	0.178	NA	NA	NA	NA	NA	NA	NA	NA	NA	NA	NA	NA	NA	NA	NA	NA
chr11:67765922-67766642/-	NA	NA	5.053	0	NA	NA	NA	NA	NA	NA	NA	NA	NA	NA	NA	NA	NA	NA	NA	NA	NA	NA	NA	NA	NA	NA	NA	NA	NA	NA
chr11:67766775-67766988/-	NA	NA	4.734	1.837	NA	NA	NA	NA	NA	NA	NA	NA	NA	NA	NA	NA	NA	NA	NA	NA	NA	NA	NA	NA	NA	NA	NA	NA	NA	NA
chr11:67786106-67786241/+	NA	NA	3.937	2.098	NA	NA	NA	NA	NA	NA	NA	NA	NA	NA	NA	NA	NA	NA	NA	NA	NA	NA	NA	NA	NA	NA	NA	NA	NA	NA
chr11:679816-680962/-	NA	NA	NA	NA	NA	NA	NA	NA	NA	NA	NA	NA	NA	NA	NA	NA	NA	NA	NA	NA	3.049	0.535	NA	NA	NA	NA	NA	NA	NA	NA
chr11:68181480-68183795/+	NA	NA	NA	NA	NA	NA	NA	NA	1.991	0.353	NA	NA	NA	NA	NA	NA	NA	NA	NA	NA	NA	NA	NA	NA	NA	NA	NA	NA	NA	NA
chr11:68191165-68192569/+	NA	NA	NA	NA	NA	NA	NA	NA	2.215	0.098	NA	NA	NA	NA	NA	NA	NA	NA	NA	NA	NA	NA	NA	NA	NA	NA	NA	NA	NA	NA
chr11:68315672-68318588/+	8.014	0.935	7.246	1.22	NA	NA	NA	NA	NA	NA	NA	NA	NA	NA	NA	NA	NA	NA	NA	NA	NA	NA	NA	NA	NA	NA	NA	NA	NA	NA
chr11:68341692-68343425/+	NA	NA	NA	NA	NA	NA	NA	NA	NA	NA	NA	NA	10.886	1.812	NA	NA	NA	NA	NA	NA	NA	NA	NA	NA	NA	NA	NA	NA	NA	NA
chr11:68358182-68359043/+	NA	NA	NA	NA	NA	NA	1.552	0	NA	NA	NA	NA	NA	NA	NA	NA	NA	NA	NA	NA	NA	NA	NA	NA	NA	NA	NA	NA	NA	NA
chr11:68369437-68370809/+	NA	NA	NA	NA	NA	NA	1.984	0.565	NA	NA	NA	NA	NA	NA	NA	NA	NA	NA	NA	NA	NA	NA	NA	NA	NA	NA	NA	NA	NA	NA
chr11:68530229-68540732/-	NA	NA	NA	NA	2.504	1.087	NA	NA	NA	NA	NA	NA	NA	NA	NA	NA	NA	NA	NA	NA	NA	NA	NA	NA	NA	NA	NA	NA	NA	NA
chr11:68552478-68560782/-	NA	NA	1.767	0.441	NA	NA	NA	NA	NA	NA	NA	NA	NA	NA	NA	NA	NA	NA	NA	NA	NA	NA	NA	NA	NA	NA	NA	NA	NA	NA
chr11:68821565-68822188/+	14.074	1.754	NA	NA	NA	NA	NA	NA	NA	NA	20	6.542	NA	NA	NA	NA	NA	NA	NA	NA	NA	NA	NA	NA	NA	NA	NA	NA	NA	NA
chr11:68822265-68822642/+	NA	NA	NA	NA	NA	NA	NA	NA	NA	NA	31.081	11.278	NA	NA	NA	NA	NA	NA	NA	NA	NA	NA	NA	NA	NA	NA	NA	NA	NA	NA
chr11:68837963-68838823/+	NA	NA	NA	NA	NA	NA	NA	NA	35.294	15.789	NA	NA	NA	NA	NA	NA	NA	NA	NA	NA	NA	NA	NA	NA	NA	NA	NA	NA	NA	NA
chr11:6964446-6964776/+	NA	NA	NA	NA	NA	NA	NA	NA	NA	NA	NA	NA	NA	NA	87.5	28.571	NA	NA	NA	NA	NA	NA	NA	NA	NA	NA	NA	NA	NA	NA
chr11:70201917-70202266/+	NA	NA	NA	NA	NA	NA	NA	NA	NA	NA	NA	NA	NA	NA	NA	NA	NA	NA	NA	NA	9.302	0	NA	NA	NA	NA	NA	NA	NA	NA
chr11:70208282-70208393/+	NA	NA	NA	NA	9.302	3.226	NA	NA	7.636	0.862	NA	NA	NA	NA	NA	NA	NA	NA	NA	NA	19.512	0.283	NA	NA	NA	NA	NA	NA	NA	NA
chr11:70253697-70255936/+	NA	NA	NA	NA	NA	NA	NA	NA	NA	NA	NA	NA	NA	NA	NA	NA	NA	NA	NA	NA	19.681	11.585	NA	NA	NA	NA	NA	NA	NA	NA
chr11:70256066-70260647/+	NA	NA	NA	NA	NA	NA	NA	NA	NA	NA	NA	NA	NA	NA	NA	NA	NA	NA	3.4	0.616	8.93	0.483	NA	NA	NA	NA	NA	NA	NA	NA
chr11:70265962-70266505/+	NA	NA	45.763	10	NA	NA	NA	NA	NA	NA	NA	NA	NA	NA	NA	NA	NA	NA	9.091	6.076	NA	NA	NA	NA	NA	NA	NA	NA	NA	NA
chr11:71192450-71192968/+	NA	NA	2.874	0	NA	NA	NA	NA	NA	NA	NA	NA	NA	NA	NA	NA	NA	NA	NA	NA	NA	NA	NA	NA	NA	NA	NA	NA	NA	NA
chr11:71627298-71628666/-	NA	NA	NA	NA	NA	NA	NA	NA	27.869	0	NA	NA	NA	NA	NA	NA	30.909	16.667	NA	NA	NA	NA	NA	NA	NA	NA	NA	NA	NA	NA
chr11:71693961-71698049/+	4.505	0	NA	NA	NA	NA	NA	NA	NA	NA	NA	NA	NA	NA	NA	NA	NA	NA	NA	NA	NA	NA	NA	NA	NA	NA	NA	NA	NA	NA
chr11:72421021-72421429/-	1.695	0	NA	NA	NA	NA	NA	NA	NA	NA	NA	NA	NA	NA	NA	NA	NA	NA	NA	NA	NA	NA	NA	NA	NA	NA	NA	NA	NA	NA
chr11:72421632-72422065/-	4.437	0	NA	NA	NA	NA	NA	NA	NA	NA	NA	NA	NA	NA	NA	NA	NA	NA	NA	NA	NA	NA	NA	NA	NA	NA	NA	NA	NA	NA
chr11:72422186-72422474/-	2.02	0.559	NA	NA	NA	NA	NA	NA	NA	NA	NA	NA	NA	NA	NA	NA	NA	NA	NA	NA	NA	NA	NA	NA	NA	NA	NA	NA	NA	NA
chr11:72468929-72469574/-	NA	NA	NA	NA	NA	NA	NA	NA	4.375	0.748	NA	NA	NA	NA	NA	NA	NA	NA	NA	NA	NA	NA	NA	NA	NA	NA	NA	NA	NA	NA
chr11:73075645-73076434/+	NA	NA	NA	NA	NA	NA	NA	NA	NA	NA	NA	NA	NA	NA	32.075	15.789	NA	NA	NA	NA	NA	NA	NA	NA	NA	NA	NA	NA	NA	NA
chr11:73101966-73102188/+	NA	NA	14.286	0	NA	NA	NA	NA	NA	NA	NA	NA	NA	NA	NA	NA	NA	NA	NA	NA	NA	NA	NA	NA	NA	NA	NA	NA	NA	NA
chr11:73102268-73103255/+	NA	NA	34.4	5.263	NA	NA	NA	NA	NA	NA	NA	NA	NA	NA	NA	NA	NA	NA	NA	NA	NA	NA	NA	NA	NA	NA	NA	NA	NA	NA
chr11:73103513-73104881/+	NA	NA	15.179	11.111	NA	NA	NA	NA	NA	NA	NA	NA	NA	NA	NA	NA	NA	NA	NA	NA	NA	NA	NA	NA	NA	NA	NA	NA	NA	NA
chr11:73947011-73950177/+	NA	NA	NA	NA	NA	NA	9.211	3.846	NA	NA	NA	NA	NA	NA	NA	NA	NA	NA	NA	NA	NA	NA	NA	NA	NA	NA	NA	NA	NA	NA
chr11:73988189-73990432/-	8.511	0.127	NA	NA	NA	NA	NA	NA	NA	NA	NA	NA	NA	NA	NA	NA	NA	NA	NA	NA	NA	NA	NA	NA	NA	NA	NA	NA	NA	NA
chr11:74554498-74555212/-	NA	NA	NA	NA	57.385	54.839	NA	NA	NA	NA	NA	NA	NA	NA	NA	NA	NA	NA	NA	NA	NA	NA	NA	NA	NA	NA	NA	NA	NA	NA
chr11:74555328-74556117/-	NA	NA	NA	NA	NA	NA	NA	NA	NA	NA	NA	NA	70.732	6.667	NA	NA	NA	NA	NA	NA	NA	NA	NA	NA	NA	NA	NA	NA	NA	NA
chr11:74559507-74562132/-	32.743	2.273	NA	NA	NA	NA	NA	NA	NA	NA	NA	NA	NA	NA	NA	NA	NA	NA	NA	NA	NA	NA	NA	NA	NA	NA	NA	NA	NA	NA
chr11:74562248-74563033/-	47.967	4.348	NA	NA	NA	NA	NA	NA	NA	NA	NA	NA	57.895	11.111	NA	NA	NA	NA	NA	NA	NA	NA	NA	NA	NA	NA	NA	NA	NA	NA
chr11:74617501-74618189/-	NA	NA	NA	NA	10.748	6.557	26.923	3.356	NA	NA	NA	NA	NA	NA	NA	NA	NA	NA	NA	NA	NA	NA	NA	NA	NA	NA	NA	NA	NA	NA
chr11:74618318-74632258/-	NA	NA	NA	NA	NA	NA	14.286	4.854	NA	NA	NA	NA	NA	NA	NA	NA	NA	NA	NA	NA	NA	NA	NA	NA	NA	NA	NA	NA	NA	NA
chr11:76169402-76170976/+	NA	NA	1.806	1.255	NA	NA	NA	NA	NA	NA	NA	NA	NA	NA	NA	NA	NA	NA	NA	NA	NA	NA	NA	NA	NA	NA	NA	NA	NA	NA
chr11:76175124-76183607/+	NA	NA	7.253	0.971	NA	NA	5.169	1.639	NA	NA	NA	NA	NA	NA	NA	NA	NA	NA	NA	NA	NA	NA	NA	NA	NA	NA	NA	NA	NA	NA
chr11:76237679-76239311/+	NA	NA	NA	NA	23.81	0	NA	NA	NA	NA	NA	NA	NA	NA	NA	NA	NA	NA	NA	NA	NA	NA	NA	NA	NA	NA	NA	NA	NA	NA
chr11:77090433-77090938/-	NA	NA	NA	NA	NA	NA	NA	NA	NA	NA	NA	NA	6.618	0.119	NA	NA	NA	NA	NA	NA	NA	NA	NA	NA	NA	NA	NA	NA	NA	NA
chr11:77330740-77333544/-	NA	NA	NA	NA	NA	NA	1.772	0.266	NA	NA	NA	NA	NA	NA	NA	NA	NA	NA	NA	NA	NA	NA	NA	NA	NA	NA	NA	NA	NA	NA
chr11:77333718-77336007/-	NA	NA	NA	NA	NA	NA	0.693	0.338	NA	NA	NA	NA	NA	NA	NA	NA	NA	NA	NA	NA	NA	NA	NA	NA	NA	NA	NA	NA	NA	NA
chr11:77336115-77336761/-	1.294	0.115	NA	NA	NA	NA	0.753	0.158	NA	NA	NA	NA	1.948	0.225	NA	NA	NA	NA	NA	NA	NA	NA	NA	NA	10.236	0.096	NA	NA	NA	NA
chr11:77825035-77825311/-	NA	NA	NA	NA	NA	NA	NA	NA	1.319	0	4.693	0	NA	NA	NA	NA	NA	NA	NA	NA	NA	NA	NA	NA	NA	NA	NA	NA	NA	NA
chr11:77910770-77911178/+	12.676	5.882	NA	NA	NA	NA	NA	NA	NA	NA	NA	NA	NA	NA	NA	NA	NA	NA	NA	NA	NA	NA	NA	NA	NA	NA	NA	NA	NA	NA
chr11:78431435-78433712/-	NA	NA	NA	NA	78.01	65.854	NA	NA	NA	NA	NA	NA	NA	NA	NA	NA	NA	NA	NA	NA	NA	NA	NA	NA	NA	NA	NA	NA	NA	NA
chr11:85428573-85429832/-	NA	NA	NA	NA	NA	NA	NA	NA	NA	NA	NA	NA	NA	NA	NA	NA	NA	NA	30.952	9.535	NA	NA	NA	NA	NA	NA	NA	NA	NA	NA
chr11:85685855-85687665/-	NA	NA	NA	NA	NA	NA	NA	NA	NA	NA	NA	NA	NA	NA	NA	NA	NA	NA	NA	NA	NA	NA	NA	NA	11.628	1.235	NA	NA	NA	NA
chr11:85687725-85689112/-	NA	NA	NA	NA	NA	NA	31.034	20.079	NA	NA	NA	NA	84.932	74.869	8.767	2.468	NA	NA	NA	NA	NA	NA	NA	NA	28.571	17.683	NA	NA	NA	NA
chr11:85689136-85692171/-	NA	NA	NA	NA	NA	NA	NA	NA	NA	NA	NA	NA	NA	NA	NA	NA	NA	NA	NA	NA	NA	NA	NA	NA	26.087	19.134	NA	NA	NA	NA
chr11:85692818-85692914/-	2.019	0.194	NA	NA	NA	NA	1.079	0.177	NA	NA	NA	NA	5.667	0.535	NA	NA	NA	NA	NA	NA	NA	NA	NA	NA	NA	NA	NA	NA	NA	NA
chr11:85711822-85712077/-	NA	NA	0.501	0.088	NA	NA	NA	NA	NA	NA	NA	NA	NA	NA	NA	NA	NA	NA	NA	NA	NA	NA	NA	NA	NA	NA	NA	NA	NA	NA
chr11:85714494-85718584/-	NA	NA	3.888	0.474	NA	NA	5.145	0.73	NA	NA	NA	NA	24.46	1.702	NA	NA	NA	NA	NA	NA	NA	NA	NA	NA	20.833	0.635	NA	NA	NA	NA
chr11:85718626-85722072/-	NA	NA	NA	NA	NA	NA	1.887	0.255	NA	NA	NA	NA	5.263	0	NA	NA	NA	NA	NA	NA	NA	NA	NA	NA	9.091	0.633	NA	NA	NA	NA
chr11:85722179-85723323/-	NA	NA	NA	NA	NA	NA	1.887	0.322	NA	NA	NA	NA	NA	NA	NA	NA	NA	NA	NA	NA	NA	NA	NA	NA	22.105	0	NA	NA	NA	NA
chr11:85723435-85725912/-	NA	NA	NA	NA	NA	NA	1.776	0.174	NA	NA	NA	NA	NA	NA	NA	NA	NA	NA	NA	NA	NA	NA	NA	NA	8.475	0	NA	NA	NA	NA
chr11:85726006-85733409/-	NA	NA	NA	NA	NA	NA	NA	NA	NA	NA	NA	NA	NA	NA	NA	NA	NA	NA	NA	NA	NA	NA	NA	NA	7.895	0	NA	NA	NA	NA
chr11:85733512-85737333/-	NA	NA	NA	NA	NA	NA	0.359	0.034	NA	NA	NA	NA	NA	NA	NA	NA	NA	NA	NA	NA	NA	NA	NA	NA	NA	NA	NA	NA	NA	NA
chr11:86267744-86270731/-	2.581	0	NA	NA	NA	NA	NA	NA	NA	NA	NA	NA	NA	NA	NA	NA	NA	NA	NA	NA	2.314	0	NA	NA	NA	NA	NA	NA	NA	NA
chr11:8644423-8645905/-	NA	NA	NA	NA	38.182	28	NA	NA	NA	NA	NA	NA	NA	NA	NA	NA	NA	NA	NA	NA	NA	NA	NA	NA	NA	NA	NA	NA	NA	NA
chr11:8732461-8732668/-	NA	NA	10.891	4	NA	NA	NA	NA	NA	NA	NA	NA	NA	NA	NA	NA	NA	NA	NA	NA	NA	NA	NA	NA	NA	NA	NA	NA	NA	NA
chr11:9192324-9199678/-	NA	NA	NA	NA	NA	NA	9.091	2.616	NA	NA	NA	NA	NA	NA	NA	NA	3.863	1.068	NA	NA	NA	NA	NA	NA	NA	NA	NA	NA	NA	NA
chr11:93455216-93456206/+	NA	NA	NA	NA	29.167	8.333	NA	NA	NA	NA	NA	NA	NA	NA	NA	NA	NA	NA	NA	NA	NA	NA	NA	NA	NA	NA	NA	NA	NA	NA
chr11:93464965-93465409/-	NA	NA	NA	NA	NA	NA	NA	NA	NA	NA	NA	NA	NA	NA	13.131	2.634	NA	NA	NA	NA	NA	NA	NA	NA	NA	NA	NA	NA	NA	NA
chr11:93466671-93467790/-	NA	NA	NA	NA	NA	NA	NA	NA	NA	NA	NA	NA	NA	NA	100	76.042	NA	NA	NA	NA	NA	NA	NA	NA	NA	NA	NA	NA	NA	NA
chr11:93469470-93469859/-	NA	NA	NA	NA	NA	NA	NA	NA	NA	NA	NA	NA	NA	NA	32.143	4.356	NA	NA	NA	NA	NA	NA	NA	NA	NA	NA	NA	NA	NA	NA
chr11:93469917-93470229/-	NA	NA	NA	NA	NA	NA	NA	NA	NA	NA	NA	NA	NA	NA	46.667	15.876	NA	NA	NA	NA	NA	NA	NA	NA	NA	NA	NA	NA	NA	NA
chr11:93521333-93523739/+	NA	NA	NA	NA	NA	NA	NA	NA	NA	NA	NA	NA	NA	NA	NA	NA	NA	NA	NA	NA	NA	NA	NA	NA	22.807	1.587	NA	NA	NA	NA
chr11:93527201-93528073/+	NA	NA	NA	NA	NA	NA	NA	NA	NA	NA	NA	NA	NA	NA	NA	NA	NA	NA	NA	NA	NA	NA	NA	NA	34.884	0.935	NA	NA	NA	NA
chr11:93529706-93530700/+	NA	NA	NA	NA	NA	NA	NA	NA	NA	NA	NA	NA	NA	NA	NA	NA	NA	NA	NA	NA	68.571	4.348	NA	NA	NA	NA	NA	NA	NA	NA
chr11:93530885-93535000/+	NA	NA	NA	NA	NA	NA	NA	NA	NA	NA	NA	NA	NA	NA	NA	NA	NA	NA	NA	NA	NA	NA	NA	NA	40.741	7.5	NA	NA	NA	NA
chr11:93819355-93821920/+	NA	NA	NA	NA	NA	NA	NA	NA	NA	NA	NA	NA	NA	NA	1.692	0.14	NA	NA	NA	NA	NA	NA	NA	NA	NA	NA	NA	NA	NA	NA
chr11:9431633-9435801/+	NA	NA	1.975	0.55	NA	NA	NA	NA	NA	NA	NA	NA	NA	NA	1.035	0.597	NA	NA	NA	NA	NA	NA	NA	NA	21.649	0.284	NA	NA	NA	NA
chr11:9435958-9438605/+	NA	NA	NA	NA	NA	NA	2.414	0.668	NA	NA	NA	NA	NA	NA	NA	NA	NA	NA	NA	NA	NA	NA	NA	NA	NA	NA	NA	NA	NA	NA
chr11:9451381-9452421/+	NA	NA	NA	NA	NA	NA	2.625	0.411	NA	NA	NA	NA	NA	NA	NA	NA	NA	NA	NA	NA	NA	NA	NA	NA	NA	NA	NA	NA	NA	NA
chr11:94533477-94554695/+	NA	NA	NA	NA	NA	NA	NA	NA	NA	NA	2.476	0	NA	NA	2.165	0.517	NA	NA	NA	NA	NA	NA	NA	NA	NA	NA	NA	NA	NA	NA
chr11:9455183-9455267/+	NA	NA	NA	NA	NA	NA	3.584	2.149	NA	NA	NA	NA	NA	NA	3.528	1.453	NA	NA	NA	NA	NA	NA	NA	NA	NA	NA	NA	NA	NA	NA
chr11:9455393-9456480/+	NA	NA	NA	NA	NA	NA	0.813	0.046	NA	NA	NA	NA	NA	NA	NA	NA	NA	NA	NA	NA	NA	NA	NA	NA	NA	NA	NA	NA	NA	NA
chr11:94563360-94564617/+	NA	NA	NA	NA	NA	NA	NA	NA	NA	NA	NA	NA	NA	NA	3.86	0	NA	NA	NA	NA	NA	NA	NA	NA	3.922	0	NA	NA	NA	NA
chr11:9838571-9850902/-	NA	NA	NA	NA	NA	NA	NA	NA	NA	NA	NA	NA	NA	NA	NA	NA	13.953	2.752	NA	NA	NA	NA	NA	NA	NA	NA	NA	NA	NA	NA
chr11:9851043-9853770/-	NA	NA	NA	NA	9.609	2.564	NA	NA	NA	NA	NA	NA	NA	NA	NA	NA	NA	NA	NA	NA	NA	NA	NA	NA	NA	NA	NA	NA	NA	NA
chr11:9853967-9861044/-	NA	NA	NA	NA	NA	NA	NA	NA	NA	NA	NA	NA	NA	NA	NA	NA	7.74	4.167	NA	NA	NA	NA	NA	NA	NA	NA	NA	NA	NA	NA
chr12:101685666-101685747/+	NA	NA	6.667	2.128	NA	NA	NA	NA	NA	NA	NA	NA	NA	NA	NA	NA	NA	NA	NA	NA	NA	NA	NA	NA	NA	NA	NA	NA	NA	NA
[truncated: 4,533 more rows]

## Sheet: alternative 5' splice site
Chrom:Start-End/Strand	A549_circular_psu	A549_linear_psu	HeLa_S3_circular_psu	HeLa_S3_linear_psu	SK-N-SH_RA_circular_psu	SK-N-SH_RA_linear_psu	K562_circular_psu	K562_linear_psu	HepG2_circular_psu	HepG2_linear_psu	BJ_circular_psu	BJ_linear_psu	GM12878_circular_psu	GM12878_linear_psu	NHEK_circular_psu	NHEK_linear_psu	H1_circular_psu	H1_linear_psu	AG04450_circular_psu	AG04450_linear_psu	HUVEC_circular_psu	HUVEC_linear_psu	H9_p(A)−_circular_psu	H9_p(A)−_linear_psu	PA1_p(A)−_circular_psu	PA1_p(A)−_linear_psu	H9_p(A)−_RNaseR_circular_psu	H9_p(A)−_RNaseR_linear_psu	PA1_p(A)−_RNaseR_circular_psu	PA1_p(A)−_RNaseR_linear_psu
[truncated: 20,343 more rows]

[truncated: 1 more sheets: alternative 3' splice site]
