# Supplementary material for: Diverse alternative back-splicing and alternative splicing landscape of circular RNAs
Source: Genome Res. 2016 Sep;26(9):1277–87. doi: 10.1101/gr.202895.115 (PMC5052039; doi:10.1101/gr.202895.115)
Supplement: Supplemental Material [file supp_gr.202895.115_Supplemental_Table_S5.xlsx]

## Sheet: Table Legend
Supplemental Table S5. List of novel circRNA-predominant cassette exons.
Novel cassette exons that are highly selected in circRNAs were identified, listed with their genomic location, supported splice junction read number and PSI (Percent Spliced In) in circRNAs and their linear RNA counterparts, P value (Fisher exact test), inclusion read number and exclusion read number of circRNA and linear RNA.

## Sheet: A549
Chrom:Start-End	Strand	Circular_psi	Linear_psi	P_value	Circular_inclusion_reads	Circular_exclusion_reads	Linear_inclusion_reads	Linear_exclusion_reads
chr1:1752563-1752754	-	0.531	0	0	13	1218	0	1311
chr1:231092166-231092228	-	32.407	0.667	0	210	219	2	149
chr1:246092813-246092854	-	24.138	0	0	175	275	0	149
chr1:28119820-28119880	+	16.049	0	0	13	34	0	57
chr1:51246528-51246716	-	11.538	0.877	0	18	69	4	226
chr1:52221192-52222030	+	51.71	0	0	257	120	0	207
chr1:53346269-53346501	+	26.316	0	0	15	21	0	36
chr1:66729232-66729443	+	3.114	0	0.009	18	280	0	86
chr1:8673393-8674745	-	91.304	0	0	399	19	0	14
chr10:103569940-103572680	-	100	94.194	0.007	97	0	292	9
chr10:11606487-11607637	-	13.725	0	0	14	44	0	59
chr10:116250008-116250189	-	1.806	0	0	22	598	0	277
chr10:12133992-12134039	+	4.031	0	0	21	250	0	142
chr10:123658214-123658484	-	43.958	0	0	251	160	0	87
chr10:33208812-33209325	-	100	99.888	0.001	7976	0	14329	8
chr10:33215789-33215833	-	0.552	0.004	0	20	1802	1	11594
chr10:33482142-33483708	-	0.44	0	0.006	20	2265	0	659
chr10:43662451-43662607	+	100	79.006	0	93	0	143	19
chr10:47122003-47122297	-	45.098	15.152	0.004	23	14	5	14
chr10:4879634-4879773	+	79.879	0	0	794	100	0	16
chr10:4915405-4915499	+	67.401	27.273	0	153	37	9	12
chr10:4932063-4932115	+	29.825	9.091	0.002	68	80	4	20
chr10:5045943-5046117	-	99.931	99.434	0	8629	3	5975	17
chr10:5045943-5046168	-	99.93	99.432	0	8621	3	5952	17
chr10:5048650-5048784	-	60.795	37.6	0	459	148	423	351
chr10:5048667-5048784	-	53.386	35.478	0	339	148	386	351
chr10:5048717-5048784	-	51.948	0	0	320	148	0	351
chr10:51612908-51612988	-	59.135	0	0	547	189	0	72
chr10:60376655-60376727	+	3.704	0	0.003	10	130	0	102
chr10:75458995-75459346	-	67.568	0	0	25	6	0	8
chr10:889067-889237	-	14.685	6.151	0	42	122	35	267
chr10:889067-890718	-	14.685	5.654	0	42	122	32	267
chr10:96207391-96207427	+	26.154	0	0	17	24	0	22
chr10:96211314-96211366	+	38.235	0	0	26	21	0	22
chr11:12885127-12886295	+	14.321	0	0	116	347	0	153
chr11:27411467-27412712	-	74.949	0	0	365	61	0	42
chr11:28250417-28250478	+	10.968	0.265	0	51	207	1	188
chr11:35226058-35227790	+	0.575	0	0	29	2506	0	1125
chr11:62406839-62406939	-	98.167	0	0	2249	21	0	11
chr11:65062522-65062682	+	3.016	0	0.002	13	209	0	127
chr11:86786678-86786828	+	27.559	0	0	35	46	0	36
chr12:104683243-104684882	+	1.644	0.583	0	98	2932	51	4347
chr12:104683243-104689274	+	0.391	0.149	0.004	23	2932	13	4347
chr12:109046813-109046957	-	3.588	0.423	0	165	2217	10	1176
chr12:11180999-11181111	-	9.639	0.68	0	16	75	1	73
chr12:116668337-116668427	-	4.251	0	0	61	687	0	445
chr12:116674625-116674695	-	21.034	0	0	415	779	0	435
chr12:116674961-116675078	-	1.182	0	0	25	1045	0	437
chr12:131288707-131289088	-	38.961	13.382	0	120	94	55	178
chr12:133446199-133446384	-	47.561	0	0	78	43	0	72
chr12:133446204-133446261	-	68.841	43.969	0	190	43	113	72
chr12:47606379-47606436	+	84	44.444	0	42	4	24	15
chr12:52633253-52633335	+	0.07	0.012	0	25	17965	6	24712
chr12:53858548-53858815	+	3.21	0.42	0	504	7599	8	948
chr12:70723202-70724249	+	93.5	77.495	0	748	26	427	62
chr12:70723202-70726626	+	92.992	75	0	690	26	474	79
chr12:80008314-80008391	-	3.137	0.363	0	16	247	5	687
chr12:938227-938348	+	1.431	0	0	14	482	0	379
chr12:95676230-95676420	+	100	0	0	154	0	0	17
chr12:96114502-96114596	-	0.988	0	0.004	28	1403	0	314
chr13:100191719-100191811	+	99.275	0	0	548	2	0	19
chr13:114170357-114170422	+	8.036	2.141	0	97	555	14	320
chr13:114173849-114173970	+	10.683	2.946	0	133	556	19	313
chr13:114173849-114174043	+	11.324	2.34	0	142	556	15	313
chr13:114173849-114174116	+	14.658	3.096	0	191	556	20	313
chr13:114173849-114174189	+	9.593	2.644	0	118	556	17	313
chr14:102746984-102747161	-	62.5	1.887	0	10	3	1	26
chr14:105911754-105915746	+	94.924	85.149	0	374	10	172	15
chr14:23378691-23378774	-	99.063	94.737	0	423	2	288	8
chr14:23395714-23396023	-	100	99.255	0.002	1176	0	1333	5
chr14:59929527-59939808	-	42.593	0	0	46	31	0	10
chr14:71455268-71455416	+	61.905	17.51	0	598	184	45	106
chr14:71518605-71518729	+	93.514	0	0	173	6	0	5
chr14:76644565-76647192	+	96.201	88.506	0.004	709	14	77	5
chr15:29306293-29306483	+	29.091	7.042	0	32	39	5	33
chr15:30950968-30951047	+	54.717	28.571	0.002	116	48	12	15
chr15:44795621-44796048	+	13.122	3.333	0	29	96	14	203
chr15:49574183-49574286	+	83.673	60	0	164	16	96	32
chr15:49600804-49600974	+	13.514	0	0	30	96	0	125
chr15:59563373-59563433	-	1.066	0.366	0.002	27	1253	10	1362
chr15:60662789-60663777	-	100	0.055	0	77	0	36	32896
chr15:60662789-60663781	-	0.233	0.129	0	116	24840	85	32896
chr15:60662789-60666881	-	0.175	0.055	0	87	24840	36	32892
chr15:60662789-60669385	-	0.161	0.044	0	80	24840	29	32892
chr15:60662789-60673560	-	0.161	0.044	0	80	24840	29	32892
chr15:69641616-69641686	+	18.261	0	0.001	21	47	0	19
chr15:69681992-69687399	+	85.366	68.103	0	3080	264	632	148
chr15:71525369-71525415	+	2.632	0	0.003	48	888	0	114
chr15:71538278-71538383	+	10.103	0	0	205	912	0	184
chr15:71640646-71640829	+	4.6	0	0	46	477	0	218
chr15:72542519-72542550	-	1.955	0	0	14	351	0	353
chr15:85657103-85658504	+	100	97.814	0	769	0	895	10
chr15:85657103-85658718	+	100	99.183	0	1187	0	1942	8
chr15:85663704-85663814	+	11.082	7.955	0	341	1368	154	891
chr15:85663761-85663814	+	9.49	5.514	0	290	1383	104	891
chr15:89074601-89074704	-	100	68.182	0.001	23	0	30	7
chr16:16110440-16110478	+	95.997	0	0	1535	32	0	13
chr16:19664737-19664781	+	6.207	0	0	18	136	0	114
chr16:25154511-25154667	+	3.468	0.571	0.002	12	167	3	261
chr16:69681211-69681319	+	41.047	0	0	149	107	0	18
chr16:69681448-69681489	+	75.207	0	0	91	15	0	9
chr16:89485969-89486832	-	28.926	0	0	35	43	0	47
chr16:89493359-89493477	-	43.529	0	0	37	24	0	47
chr17:15531119-15531179	-	51.825	17.647	0	142	66	9	21
chr17:175452-175545	-	36.026	0	0	223	198	0	77
chr17:175479-175545	-	35.922	11.494	0	222	198	20	77
chr17:177502-177619	-	2.124	0	0.005	27	622	0	136
chr17:25634769-25634945	+	55.631	23.688	0	163	65	185	298
chr17:30804538-30806394	+	100	99.401	0.001	1695	0	1992	6
chr17:34856303-34856799	-	100	0	0	160	0	0	6
chr17:48734430-48734544	+	94.228	0	0	3330	102	0	55
chr17:48734445-48734544	+	94.297	0	0	3373	102	0	55
chr17:48734700-48735045	+	0.9	0.388	0.003	61	3359	12	1540
chr17:48741041-48741472	+	99.943	99.079	0	3499	1	2367	11
chr17:48741310-48742606	+	99.791	99.384	0.003	4773	5	3227	10
chr17:48750331-48751019	+	100	99.284	0	4112	0	1664	6
chr17:53479574-53479664	-	32.331	5.14	0	43	45	22	203
chr17:55945510-55946554	-	100	97.613	0.006	276	0	409	5
chr17:57078958-57079116	-	79.73	68.379	0.009	118	15	173	40
chr17:57094734-57094785	-	84.507	0	0	120	11	0	7
chr17:79030202-79030277	+	17.588	0	0	35	82	0	29
chr17:79575753-79577284	-	98.446	96.79	0.008	1394	11	784	13
chr17:80725980-80726092	+	5.78	0.383	0	73	595	1	130
chr17:80725980-80726096	+	3.094	0.383	0.005	38	595	1	130
chr17:80858471-80858607	+	93.182	0	0	492	18	0	11
chr18:21358549-21358843	+	9.851	3.145	0.005	33	151	5	77
chr18:21417961-21417996	+	4.202	0.488	0.004	30	342	1	102
chr18:45415391-45415462	-	2.308	0.327	0	30	635	5	762
chr18:76964747-76964874	+	13.043	1.639	0.007	18	60	1	30
chr19:36582101-36582367	+	100	91.86	0	277	0	158	7
chr19:3661370-3661524	-	19.172	0	0	213	449	0	29
chr19:37203494-37203563	+	18.593	8.543	0.003	37	81	17	91
chr2:100041234-100041361	-	13.58	5	0.002	22	70	12	114
chr2:100048202-100048402	-	54.128	20.635	0	118	50	26	50
chr2:107454953-107455133	-	2.919	0.677	0	35	582	5	367
chr2:175805543-175805622	-	14.773	4.192	0.001	26	75	7	80
chr2:176858872-176859008	-	71.429	23.077	0.001	10	2	18	30
chr2:202000920-202003687	+	24.242	6.897	0	16	25	40	270
chr2:20494205-20494279	-	93.754	0	0	4623	154	0	18
chr2:228398328-228398474	+	99.302	0	0	2276	8	0	5
chr2:234298540-234298687	+	5.41	0	0	31	271	0	215
chr2:234298574-234298687	+	6.873	1.149	0	40	271	5	215
chr2:238939196-238939993	+	100	95.152	0.007	117	0	314	8
chr2:238939882-238940125	+	10.204	0	0	15	66	0	278
chr2:240939599-240939804	-	13.122	0	0	116	384	0	398
chr2:240957231-240958056	-	98.756	0	0	2222	14	0	11
chr2:242285580-242286885	+	100	98.309	0	803	0	1860	16
chr2:26998331-26998657	+	99.25	93.711	0	529	2	149	5
chr2:29011556-29011675	+	89.118	0	0	1081	66	0	40
chr2:36596250-36596392	+	4.545	1.368	0	108	1134	17	613
chr2:36615114-36615218	+	6.637	0	0	177	1245	0	626
chr2:36615114-36630954	+	16.633	0	0	83	208	0	57
chr2:37217790-37217939	-	100	57.143	0	32	0	80	30
chr2:48689334-48689411	+	31.818	10.983	0.001	14	15	19	77
chr2:58284996-58285623	+	8.271	0	0	11	61	0	309
chr2:61752404-61752464	-	21.026	1.519	0	41	77	19	616
chr2:68742716-68742868	+	64.444	6.897	0	29	8	4	27
chr2:69270863-69271191	+	13.349	1.439	0	114	370	21	719
chr2:73467630-73467671	+	77.156	74.002	0.002	2594	384	2021	355
chr2:85596588-85596735	+	6.4	0	0	16	117	0	81
chr2:9458652-9459590	+	96.296	76.577	0.001	52	1	85	13
chr20:17934639-17936119	-	100	99.587	0.003	1841	0	2897	6
chr20:30955442-30955532	+	85.466	0	0	835	71	0	9
chr20:34241449-34243266	-	70.494	48.276	0	1013	212	280	150
chr20:34242788-34243266	-	96.004	0	0	1009	21	0	25
chr20:5957934-5958025	+	15.714	6.857	0	44	118	24	163
chr21:16387465-16387546	-	14.868	0.962	0	124	355	2	103
chr21:16412683-16412737	-	5.589	0.488	0	47	397	1	102
chr21:17137100-17137203	+	20	0.418	0	112	224	1	119
chr21:38797991-38798083	+	39.2	0	0	98	76	0	12
chr22:50832178-50832228	+	16.402	4.478	0	62	158	6	64
chr3:10094135-10094181	+	98.608	0	0	425	3	0	6
chr3:110852507-110853052	+	4.156	0	0	17	196	0	182
chr3:124551723-124552861	-	0.562	0.131	0.005	23	2033	3	1141
chr3:12540979-12543223	+	6.81	0	0	19	130	0	133
chr3:12543166-12543223	+	10.345	3.623	0.001	30	130	10	133
chr3:145839757-145839820	-	7.317	2.306	0	24	152	22	466
chr3:145841051-145841108	-	6.07	2.141	0.001	19	147	20	457
chr3:151523580-151526028	+	77.429	46.707	0	247	36	156	89
chr3:151525146-151526028	+	78.443	30.739	0	262	36	79	89
chr3:151525865-151526028	+	82.734	37.324	0	345	36	106	89
chr3:33681176-33681302	-	6.186	1.382	0.009	12	91	3	107
chr3:9477751-9477824	+	11.111	2.703	0.002	10	40	10	180
chr4:187517693-187518425	-	97.859	93.96	0.005	457	5	280	9
chr4:187518187-187518425	-	70.588	25	0.001	24	5	6	9
chr4:74005247-74005291	-	45.558	27.313	0	959	573	124	165
chr4:74005361-74006000	-	12.37	0	0	166	588	0	170
chr5:137661503-137661743	-	94.783	69.634	0	109	3	133	29
chr5:156429860-156429918	-	100	72.973	0.001	31	0	27	5
chr5:156456308-156456852	-	64.211	0	0	61	17	0	20
chr5:16760920-16760984	-	1.499	0	0	20	657	0	725
chr5:65451892-65452030	+	26.916	16.848	0	137	186	62	153
chr5:65451892-65454058	+	26.916	17.073	0	137	186	63	153
chr6:64102441-64102579	-	17.404	4.965	0	59	140	7	67
chr7:107816865-107817051	-	100	97.823	0	604	0	719	8
chr7:11142112-11150178	+	20.988	6.131	0	17	32	29	222
chr7:116364746-116364901	+	9.38	0	0	236	1140	0	455
chr7:134221460-134221478	+	97.528	63.47	0	10021	127	278	80
chr7:134260248-134260294	+	99.064	83.336	0	16514	78	5711	571
chr7:158583865-158584050	-	8.209	0	0	22	123	0	408
chr7:23401171-23401216	-	95.05	0	0	192	5	0	23
chr7:27686770-27686900	-	19.118	4.065	0	52	110	35	413
chr7:47392678-47396301	-	1.799	0	0.005	10	273	0	197
chr7:47445094-47451123	-	2.498	0.813	0.005	58	1132	5	305
chr7:47510040-47512919	-	1.648	0	0	72	2149	0	311
chr7:47544875-47546542	-	94.818	0	0	988	27	0	5
chr7:47551914-47551981	-	1.436	0	0	28	961	0	313
chr7:65944021-65944083	-	72.84	0	0	118	22	0	7
chr7:80424169-80424273	-	1.734	0.601	0	93	2635	20	1654
chr8:129004903-129005185	+	23.867	8.44	0	79	126	33	179
chr8:129004903-129008844	+	21.528	11.656	0.001	62	113	38	144
chr8:141889569-141894267	-	90.328	71.098	0	579	31	369	75
chr8:142208808-142208909	-	3.169	0	0.005	25	382	0	92
chr8:19377072-19379650	-	4.519	0.19	0	23	243	1	263
chr8:19423657-19423817	-	7.048	3.189	0.003	37	244	17	258
chr8:19445386-19445534	-	5.376	1.768	0.001	35	308	9	250
chr8:19539983-19540592	-	6.077	0	0	44	340	0	186
chr8:62531536-62538839	-	100	99.227	0.009	641	0	7189	28
chr8:62559513-62559616	-	0.882	0.302	0	38	2136	50	8252
chr8:62564922-62565070	-	0.681	0.152	0	40	2917	24	7863
chr8:62574364-62574485	-	0.339	0	0	17	2498	0	7637
chr8:62593757-62593826	-	0.458	0.006	0	42	4564	1	8676
chr8:62594997-62595067	-	12.518	1.517	0	1030	3599	265	8603
chr9:111853201-111853432	-	100	93.382	0	509	0	254	9
chr9:126331834-126331874	-	7.57	0	0	19	116	0	65
chr9:130981535-130982365	+	92.562	0	0	1817	73	0	6
chr9:134312232-134312282	+	26.612	1.205	0	161	222	2	82
chr9:138774060-138774222	-	11.698	0	0	186	702	0	33
chr9:138774060-138774274	-	10.516	0	0.001	165	702	0	33
chr9:75540417-75540528	-	99.94	0	0	10031	3	0	8
chr9:96261076-96261168	+	90.378	0	0	789	42	0	9
chr9:97203337-97203381	+	92.329	0	0	337	14	0	5
chrX:23752448-23752484	-	78.261	0	0	180	25	0	47
chrX:53652746-53652983	-	24.292	8.742	0	283	441	41	214
chrX:71682211-71682292	-	4.23	1.003	0.005	25	283	3	148

## Sheet: HeLa_S3
Chrom:Start-End	Strand	Circular_psi	Linear_psi	P_value	Circular_inclusion_reads	Circular_exclusion_reads	Linear_inclusion_reads	Linear_exclusion_reads
chr1:1451013-1451238	+	33.333	0	0	26	26	0	34
chr1:151214655-151214745	+	92.258	81.568	0	715	30	593	67
chr1:153603486-153604301	-	98.524	83.838	0	267	2	83	8
chr1:16528601-16528615	-	17.526	0	0	34	80	0	39
chr1:207940951-207941168	+	54.08	17.776	0	782	332	1228	2840
chr1:21307540-21307711	-	95.09	83.333	0	1162	30	180	18
chr1:21327728-21327817	-	1.288	0	0.001	18	690	0	312
chr1:231092166-231092228	-	17.677	0	0	70	163	0	154
chr1:235643417-235643465	-	98.992	0	0	589	3	0	5
chr1:235652472-235652657	-	92.523	82.745	0	297	12	211	22
chr1:246092813-246092854	-	13.804	0	0	172	537	0	123
chr1:44069281-44069524	+	97.42	82.353	0	1888	25	84	9
chr1:44069620-44069860	+	95.43	0	0	1044	25	0	9
chr1:93169293-93169478	-	33.333	6.452	0	18	18	8	58
chr1:93169397-93169478	-	23.404	0	0	11	18	0	58
chr10:101595874-101595994	+	90.95	29.412	0	201	10	5	6
chr10:126650855-126650977	+	7.06	2.414	0	115	757	14	283
chr10:21962710-21962848	+	100	0	0	504	0	0	5
chr10:51580555-51580968	+	100	98.621	0	5867	0	2289	16
chr10:69908109-69908320	+	100	96.166	0	502	0	301	6
chr10:70500391-70500418	+	89.744	0	0	1435	82	0	44
chr10:7407185-7407477	-	13.001	0	0	107	358	0	39
chr10:75830781-75830841	+	39.45	0	0	86	66	0	18
chr10:889067-890718	-	19.192	1.404	0	19	40	8	281
chr11:1000431-1000684	+	94.059	31.034	0	95	3	9	10
chr11:61134899-61134997	+	13.12	0	0	90	298	0	1141
chr11:61134899-61135092	+	12.865	0	0	88	298	0	1141
chr11:68343425-68343502	+	100	94.962	0	548	0	377	10
chr11:71188390-71188484	+	9.853	0	0	188	860	0	98
chr11:73429657-73429935	-	99.281	97.452	0.003	828	3	765	10
chr11:76179895-76179941	+	4.091	1.163	0.003	18	211	6	255
chr11:85374222-85374337	-	68.382	32.277	0	186	43	163	171
chr11:85711685-85712201	-	99.977	99.739	0	8776	1	4580	6
chr11:86786678-86786828	+	11.429	0	0	16	62	0	45
chr12:100690539-100690675	+	8.276	0	0	24	133	0	97
chr12:111916873-111916906	-	7.914	0	0	22	128	0	69
chr12:20785010-20786712	+	95.45	91.031	0	1804	43	1015	50
chr12:22821531-22821634	+	9.333	0	0	21	102	0	79
chr12:22821531-22821656	+	15.353	0	0	37	102	0	79
chr12:28408934-28409011	+	8.861	0	0	21	108	0	55
chr12:40422409-40422485	-	2.075	0.204	0.005	10	236	1	245
chr12:53858543-53858815	+	54.234	44.053	0	14896	6285	2074	1317
chr12:70723202-70724249	+	95.725	89.644	0	627	14	554	32
chr12:80008314-80008391	-	4.516	0	0	14	148	0	430
chr13:114173849-114173970	+	5.933	0.958	0	167	1324	3	155
chr13:114173849-114174043	+	5.563	0.641	0	156	1324	2	155
chr13:114173849-114174189	+	2.897	0.641	0.008	79	1324	2	155
chr14:21730759-21730857	-	3.052	1.873	0	642	10197	248	6496
chr14:39524346-39524448	-	100	98.179	0.001	530	0	539	5
chr14:45706374-45706522	-	44	2.105	0	11	7	12	279
chr14:70467412-70467460	+	9.259	1.823	0	30	147	14	377
chr15:25638892-25639005	-	2.172	0	0.001	21	473	0	193
chr15:25652200-25652284	-	7.463	0	0	50	310	0	93
chr15:31201725-31201968	+	17.895	2.797	0	17	39	8	139
chr15:78327031-78327081	-	17.857	2.062	0	10	23	4	95
chr15:89838187-89838325	+	96.396	88.506	0.005	107	2	693	45
chr16:2679004-2679119	-	7.784	0	0	26	154	0	64
chr16:68308927-68309152	+	96.53	93.605	0.008	3004	54	322	11
chr16:68325111-68325564	+	99.878	98.536	0	1642	1	673	5
chr16:87762915-87762970	-	8.852	0.699	0	27	139	2	142
chr16:89485969-89486832	-	10.219	0	0.005	28	123	0	27
chr16:89493174-89493477	-	57.447	0	0	108	40	0	26
chr17:3524372-3524706	-	50.702	0	0	325	158	0	26
chr17:35802670-35802753	+	100	76.744	0	143	0	165	25
chr17:53479526-53479664	-	17.685	1.176	0	55	128	1	42
chr17:53479574-53479664	-	23.582	4.545	0	79	128	4	42
chr17:79030202-79030277	+	26.027	2.564	0	38	54	1	19
chr17:79892404-79892621	-	80.357	0	0	360	44	0	9
chr17:79952696-79953941	+	100	88.991	0	639	0	97	6
chr18:21358549-21358843	+	23.502	4	0	51	83	5	60
chr18:44398240-44398410	-	8.228	0	0	26	145	0	88
chr18:45394422-45394468	-	0.478	0	0	14	1456	0	1316
chr19:11526612-11526891	-	100	60	0.002	16	0	21	7
chr19:3544064-3544730	-	32.683	23.288	0	804	828	136	224
chr19:3661370-3661524	-	28.519	0	0	699	876	0	21
chr19:50484986-50485445	-	20.588	0	0	14	27	0	32
chr19:54691066-54691169	-	83.366	0	0	421	42	0	15
chr19:58904737-58904854	+	97.078	93.962	0	13556	204	4295	138
chr2:100048202-100048402	-	63.125	41.627	0	202	59	87	61
chr2:159481471-159481939	+	96.842	0	0	1656	27	0	8
chr2:159932986-159933040	+	25.369	15.821	0	378	556	53	141
chr2:176858872-176859008	-	54.545	18.75	0.002	12	5	12	26
chr2:223765397-223765498	+	40.94	0	0	488	352	0	156
chr2:228401340-228401709	+	98.552	95.258	0	13477	99	1607	40
chr2:238939882-238939993	+	27.536	0	0	19	25	0	166
chr2:32689576-32689639	+	97.425	91.358	0	1665	22	148	7
chr2:32689576-32689643	+	97.424	91.304	0	1664	22	147	7
chr2:36658251-36658364	+	1.018	0	0.002	16	778	0	361
chr2:36764497-36764689	+	94.654	68.12	0	4958	140	453	106
chr2:37516484-37516656	-	84.615	0	0	121	11	0	9
chr2:85782905-85783113	-	4.541	0	0	45	473	0	135
chr20:11899733-11900071	+	100	85.536	0	710	0	958	81
chr20:11899733-11900258	+	100	85.458	0	710	0	952	81
chr20:23375775-23375899	-	76.147	42.466	0	83	13	31	21
chr20:30136479-30136917	+	100	97.824	0	1935	0	899	10
chr20:42246880-42246993	+	7.639	0	0	22	133	0	214
chr21:38792600-38792654	+	76.471	56.989	0	494	76	53	20
chr21:38794079-38794168	+	21.218	0	0	404	750	0	121
chr21:46552129-46553580	+	3.529	0	0	27	369	0	217
chr21:46563056-46563146	+	52.65	14.493	0	149	67	40	118
chr21:46580015-46580138	+	37.037	14.201	0	60	51	48	145
chr22:26867174-26867354	-	6.719	0	0.002	17	118	0	57
chr22:28288116-28288318	-	19.512	0	0	16	33	0	187
chr3:12543166-12543223	+	10.506	1.905	0	27	115	12	309
chr3:132297872-132297900	-	48.148	0	0	13	7	0	36
chr3:169866888-169867032	-	71.544	0	0	1418	282	0	62
chr3:176825833-176825896	-	3.526	0	0.003	50	684	0	88
chr3:179418870-179418917	+	80.723	0	0	134	16	0	9
chr3:197593023-197593090	+	78.168	0	0	401	56	0	20
chr3:4458259-4458343	-	5.099	0.817	0	36	335	3	182
chr3:44963789-44968339	-	55.396	0	0	154	62	0	6
chr3:54796697-54796798	+	8.219	0	0.001	12	67	0	55
chr4:54308186-54308227	+	1.928	0	0	14	356	0	285
chr4:726204-726287	+	29.722	0	0	203	240	0	49
chr5:180666519-180666582	-	99.996	0	0	56633	1	0	58
chr5:31468069-31468170	-	100	98.643	0	857	0	872	6
chr5:648214-648338	+	13.158	0	0	110	363	0	74
chr5:648493-648520	+	13.285	0	0	129	421	0	75
chr5:93806751-93806850	-	5.226	1.571	0	30	272	9	282
chr6:150093180-150093383	+	3.592	0.598	0	19	255	11	914
chr6:166361951-166362093	-	21.748	15.665	0.001	204	367	133	358
chr6:43457636-43457766	+	18.868	0	0	20	43	0	38
chr6:99374714-99374936	-	77.676	0	0	508	73	0	34
chr7:140508036-140508142	-	9.22	1.422	0.001	13	64	3	104
chr7:152496738-152496870	+	7.463	0	0	15	93	0	96
chr7:156998121-156998317	+	1.499	0.52	0.004	22	723	9	861
chr7:32662984-32663051	-	100	63.636	0.005	15	0	21	6
chr7:44687042-44687358	+	97.5	86.598	0	858	11	168	13
chr7:6169838-6169929	+	16.667	0	0	10	25	0	45
chr7:64004454-64004579	-	10.798	0	0.004	23	95	0	27
chr7:6427744-6427924	+	1.531	0	0	30	965	0	2223
chr8:128161751-128172398	-	95.455	0	0	42	1	0	15
chr8:128161860-128161917	-	99.637	84.043	0	549	1	158	15
chr8:128161860-128165589	-	98.964	82.036	0	191	1	137	15
chr8:128161860-128172398	-	99.13	62.5	0	228	1	50	15
chr8:128164973-128172398	-	14.583	0	0	42	123	0	61
chr8:128172241-128172398	-	7.57	2.09	0	57	348	7	164
chr8:128176682-128176771	-	42.373	31.699	0	600	408	194	209
chr8:128231059-128231211	-	98.623	96.016	0	2005	14	482	10
chr8:128231578-128232650	-	28.516	2.475	0	1902	2384	30	591
chr8:42719759-42719836	-	17.976	5.263	0	103	235	17	153
chr9:100840047-100840168	+	9.508	0	0	58	276	0	515
chr9:108476646-108476786	+	3.957	1.079	0	22	267	12	550
chr9:125621317-125621381	-	96.748	0	0	5058	85	0	14
chr9:125622382-125622410	-	92.023	0	0	323	14	0	7
chr9:133345518-133345583	+	0.316	0.086	0	40	6303	16	9264
chr9:138774060-138774274	-	14.895	0	0	615	1757	0	62
chr9:34647537-34647702	+	82.123	0	0	147	16	0	22
chr9:37127091-37127260	+	7.602	0	0	13	79	0	189
chr9:5736334-5736392	+	6.468	0	0	13	94	0	125
chr9:6825306-6825383	+	12.121	0	0	32	116	0	81
chr9:74828941-74829993	+	5.727	0	0	13	107	0	870
chrX:153585158-153585642	-	76.111	0	0	9176	1440	0	45

## Sheet: SK_N_SH_RA
Chrom:Start-End	Strand	Circular_psi	Linear_psi	P_value	Circular_inclusion_reads	Circular_exclusion_reads	Linear_inclusion_reads	Linear_exclusion_reads
chr1:12638745-12638802	-	99.479	99.048	0.002	12600	33	4161	20
chr1:155746209-155746272	-	44.134	0	0	237	150	0	9
chr1:231092166-231092228	-	18.436	0	0	66	146	0	76
chr1:243727586-243727689	-	2.475	0.386	0.002	20	394	2	258
chr1:246092813-246092854	-	15.875	0	0	117	310	0	151
chr1:41232273-41232375	+	100	96.753	0.001	345	0	298	5
chr1:44364839-44365399	+	100	94.425	0	411	0	271	8
chr1:67147551-67149870	+	13.676	5.566	0	109	344	29	246
chr10:17421355-17421424	-	23.622	5.686	0	60	97	17	141
chr10:21248852-21248931	-	17.051	5.426	0	37	90	21	183
chr10:72484923-72485098	+	3.166	0	0	24	367	0	343
chr10:73583644-73583653	-	42.075	37.876	0	8144	5606	7271	5963
chr10:73583644-73583864	-	26.042	22.392	0	3948	5606	3441	5963
chr11:30557540-30557597	-	88.382	80.055	0	639	42	289	36
chr11:30562824-30563021	-	0.876	0	0	61	3453	0	763
chr11:30562920-30578217	-	0.73	0	0	49	3331	0	739
chr11:30577998-30578217	-	0.667	0	0	45	3352	0	739
chr11:30591628-30591799	-	1.059	0	0	72	3364	0	755
chr11:30591704-30591799	-	1.465	0	0	100	3364	0	755
chr11:70267575-70268698	+	100	70.248	0	178	0	255	54
chr12:102307906-102308010	+	89.873	0	0	284	16	0	22
chr12:109046813-109046957	-	5.701	0.339	0	137	1133	3	441
chr12:109212211-109212334	-	6.101	1.639	0.006	59	454	3	90
chr12:116674625-116674695	-	16.477	1.053	0	159	403	2	94
chr12:19619681-19619784	+	4.348	0	0	11	121	0	146
chr12:28408919-28409011	+	5.357	0	0.009	12	106	0	53
chr12:42778701-42778798	+	56.989	0	0	53	20	0	68
chr12:5276480-5278440	+	21	0	0	42	79	0	49
chr12:5276480-5278469	+	12.222	0	0	22	79	0	49
chr12:5278319-5278440	+	17.708	0	0	34	79	0	49
chr12:53858543-53858815	+	61.874	57.995	0	13389	4125	2430	880
chr13:114164855-114166302	+	0.614	0	0.003	11	890	0	635
chr13:114173849-114173970	+	2.091	0	0	39	913	0	636
chr13:114173849-114174043	+	1.986	0	0	37	913	0	636
chr13:114173849-114174116	+	1.51	0	0	28	913	0	636
chr14:67454652-67454724	+	6.794	0	0	57	391	0	91
chr14:71933763-71933964	+	22.034	0	0.002	26	46	0	14
chr16:23118651-23118735	-	30.526	15.966	0.001	145	165	19	50
chr16:2611746-2611909	+	97.5	0	0	156	2	0	8
chr16:53908486-53908557	+	1.728	0	0.003	21	597	0	191
chr16:53908486-53908591	+	1.728	0	0.003	21	597	0	191
chr16:89485969-89486832	-	16.418	0	0	11	28	0	75
chr16:983674-984145	-	32.283	0	0	41	43	0	65
chr17:20852415-20859666	+	100	0	0	113	0	0	5
chr17:25634769-25634945	+	90.367	74.039	0	1107	59	1021	179
chr17:25634769-25635663	+	89.915	72.94	0	1052	59	965	179
chr17:40061774-40061842	-	99.634	98.273	0.005	1088	2	569	5
chr17:46109525-46109599	-	86.751	0	0	275	21	0	31
chr17:53479574-53479664	-	21.285	1.828	0	53	98	7	188
chr17:55387488-55387687	+	2.595	0	0.001	13	244	0	177
chr17:78201621-78201759	+	76.471	0	0	104	16	0	17
chr17:79030202-79030277	+	17.293	0	0	23	55	0	34
chr18:9594084-9594232	-	3.673	0	0	27	354	0	128
chr19:58264658-58267059	+	90.769	67.606	0	177	9	96	23
chr19:58330935-58331313	+	60.902	0	0	81	26	0	6
chr19:9768900-9768965	-	10.309	0	0.003	20	87	0	31
chr2:216243852-216245803	-	100	99.683	0	4064	0	3771	6
chr2:242194945-242194995	-	49.434	0	0	1048	536	0	159
chr2:33498764-33498848	+	97.96	0	0	7396	77	0	40
chr2:64084097-64084852	+	24.324	0	0	18	28	0	163
chr20:34400544-34400641	+	15.315	5.512	0.004	34	94	7	60
chr20:35236292-35236408	+	12.03	2.628	0	32	117	21	389
chr21:17136556-17136616	+	7.28	0	0.002	19	121	0	48
chr21:17137100-17137203	+	14.894	0	0	42	120	0	48
chr22:50827462-50827540	+	28.863	10.152	0	99	122	40	177
chr22:50827462-50830444	+	28.024	2.747	0	95	122	10	177
chr22:50830295-50831131	+	6.964	0	0	25	167	0	201
chr22:50832178-50832228	+	20.747	7.656	0	100	191	32	193
chr3:119234706-119234786	+	2.695	0	0	19	343	0	896
chr3:196534074-196534233	+	3.498	0	0	29	400	0	145
chr3:197593023-197593090	+	74.118	0	0	252	44	0	23
chr3:52157548-52157615	-	28.302	0	0.001	15	19	0	15
chr3:93715406-93715980	+	55.882	25	0	38	15	20	30
chr4:106358542-106359193	-	100	0	0	62	0	0	7
chr4:107130024-107130178	-	3.016	0.665	0.008	13	209	3	224
chr4:3104332-3104475	+	4.928	0	0.009	17	164	0	54
chr4:74029018-74029149	-	2.507	0	0.007	18	350	0	111
chr5:134686512-134696294	-	100	97.891	0.003	353	0	557	6
chr5:134686512-134705293	-	100	98.799	0	1209	0	987	6
chr5:82834205-82838087	+	84.321	0	0	925	86	0	6
chr6:37250243-37250280	+	46.667	0	0	14	8	0	17
chr7:47514274-47520739	-	98.597	0	0	3232	23	0	5
chr7:47514274-47521327	-	73.864	0	0	130	23	0	5
chr7:47514313-47520739	-	98.552	0	0	3130	23	0	5
chr7:47514446-47520739	-	98.558	0	0	3143	23	0	5
chr7:64004454-64004579	-	19.553	0	0	35	72	0	25
chr7:65556712-65557073	+	100	99.426	0	2000	0	4851	14
chr7:66205143-66205779	+	95.021	78.261	0	229	6	72	10
chr7:87600608-87600690	+	11.494	5.178	0	387	1490	70	641
chr7:87606778-87606886	+	9.703	0	0	349	1624	0	667
chr8:131373915-131374612	-	43.994	29.114	0	586	373	69	84
chr8:37687506-37687532	+	90.476	0	0	114	6	0	5
chr8:62593757-62595042	-	11.404	0	0	234	909	0	583
chr8:62594997-62595067	-	10.311	3.636	0	209	909	44	583
chr9:108112858-108112906	+	2.235	0	0.008	15	328	0	126
chr9:128233361-128240461	-	6.228	1.985	0	36	271	39	963
chr9:134312232-134312282	+	27.273	0	0	183	244	0	145
chr9:14273486-14273585	-	3.917	0	0	49	601	0	230
chr9:14622538-14622689	-	36.102	26.027	0.009	113	100	57	81
chr9:14677295-14677459	-	47.826	20.69	0.001	33	18	12	23
chr9:91726284-91726485	-	7.104	0	0.009	13	85	0	39
chrX:153585158-153585642	-	69.713	0	0	6399	1390	0	234
chrX:3743123-3743272	-	19.658	0	0.001	138	282	0	16
chrX:3779766-3781686	-	50.775	0	0.001	295	143	0	5
chrX:3779842-3781686	-	52.03	0	0.001	282	130	0	5
chrX:71710778-71710850	-	97.153	91.964	0.008	273	4	206	9

## Sheet: K562
Chrom:Start-End	Strand	Circular_psi	Linear_psi	P_value	Circular_inclusion_reads	Circular_exclusion_reads	Linear_inclusion_reads	Linear_exclusion_reads
chr1:109482666-109484173	-	100	96.569	0.002	235	0	394	7
chr1:174242714-174242799	+	5.376	0	0.001	30	264	0	70
chr1:174244617-174244719	+	40	11.268	0	244	183	16	63
chr1:176113140-176113236	-	9.87	2.674	0	53	242	10	182
chr1:211444838-211445216	+	15.356	0	0	41	113	0	96
chr1:226483542-226485514	-	100	85.787	0	101	0	169	14
chr1:227216357-227216437	-	100	94.304	0	324	0	298	9
chr1:231092166-231092228	-	16.245	0	0	45	116	0	49
chr1:23366751-23366927	+	2.817	0	0	16	276	0	468
chr1:244595253-244595366	-	4.027	0	0	12	143	0	267
chr1:246092813-246092854	-	12.092	0.558	0	285	1036	15	1337
chr1:28368817-28369161	-	79.358	0	0	346	45	0	32
chr1:29424333-29424447	+	93.103	0	0	729	27	0	39
chr1:31467896-31468067	-	97.812	0	0	447	5	0	5
chr1:33099245-33099673	-	100	95.285	0.005	119	0	768	19
chr1:36358120-36358278	+	88.517	0	0	185	12	0	12
chr1:39794272-39802325	+	45.245	0	0	157	95	0	37
chr1:42783763-42783827	-	18.072	0	0	15	34	0	30
chr1:51218109-51218195	-	0.943	0	0.004	11	578	0	388
chr1:51246528-51246716	-	3.133	1.149	0.003	37	572	9	387
chr1:51320013-51320089	-	0.969	0	0.005	12	613	0	340
chr1:51320013-51320160	-	1.526	0	0	19	613	0	340
chr1:52218174-52226452	+	98.928	0	0	923	5	0	6
chr1:52860225-52860287	-	12.994	6.149	0	46	154	65	496
chr1:53346272-53346325	+	10	2.273	0.003	14	63	4	86
chr10:105197967-105198082	+	2.476	0	0	13	256	0	225
chr10:131966056-131967754	+	97.26	0	0	142	2	0	6
chr10:51307787-51307906	-	13.247	1.852	0	51	167	2	53
chr10:70499743-70500418	+	91.973	0	0	550	24	0	30
chr11:28249541-28249701	+	11.728	1.832	0	38	143	5	134
chr11:31490162-31491344	-	42.282	0	0	63	43	0	109
chr11:31491264-31491344	-	44.516	30.573	0.002	69	43	96	109
chr11:47653217-47653263	-	96.279	0	0	414	8	0	13
chr11:5274485-5274635	-	33.333	0	0	10175	10175	0	82261
chr11:61078939-61079367	-	94.906	0	0	1006	27	0	32
chr11:73429657-73429935	-	100	95.057	0	517	0	500	13
chr12:109046813-109046957	-	5.481	0.236	0	127	1095	6	1270
chr12:116674961-116675078	-	2.186	0	0.004	27	604	0	142
chr12:123058168-123058292	+	1.138	0	0.002	16	695	0	340
chr12:28408934-28409011	+	12.794	0	0	49	167	0	58
chr12:46347610-46353997	-	5.842	0	0	17	137	0	193
chr12:76462688-76462724	-	97.073	93.577	0	597	9	1894	65
chr13:114170357-114170422	+	17.241	1.471	0	60	144	6	201
chr13:114173849-114173970	+	12.717	1.241	0	44	151	5	199
chr13:114173849-114174043	+	15.877	1.241	0	57	151	5	199
chr13:114173849-114174116	+	15.877	2.689	0	57	151	11	199
chr13:114173849-114174189	+	11.437	1.241	0	39	151	5	199
chr13:96637492-96637591	-	22.449	0	0.001	11	19	0	19
chr14:45516103-45516227	+	55.556	21.739	0.004	15	6	10	18
chr14:76644334-76644385	+	83.732	0	0	175	17	0	14
chr15:83296888-83297307	-	35.714	0	0	20	18	0	22
chr15:87965965-87966067	-	82.4	36	0	103	11	9	8
chr15:87965965-87973353	-	82.114	38.462	0	101	11	10	8
chr16:18716430-18716506	-	58.333	0	0	14	5	0	9
chr16:68172413-68172485	+	8.168	2.954	0	37	208	14	230
chr16:7905126-7905165	-	100	94.749	0.001	164	0	397	11
chr16:7929540-7929773	-	38.053	23.853	0	86	70	104	166
chr16:7929540-7929796	-	38.596	15.09	0	88	70	59	166
chr16:87762915-87762970	-	12.042	0	0	23	84	0	112
chr17:30697018-30697101	+	75.163	52.632	0	115	19	160	72
chr17:34034932-34035028	+	3.767	1.421	0	35	447	32	1110
chr17:35557248-35557277	-	4.681	0	0.007	11	112	0	66
chr17:35802670-35802753	+	91.667	0	0	66	3	0	11
chr17:55448309-55448352	+	5.442	0	0	16	139	0	186
chr17:64509453-64509499	+	41.27	1.005	0	156	111	4	197
chr17:79030202-79030277	+	33.333	0	0	32	32	0	40
chr17:80725980-80726092	+	4.989	0	0	23	219	0	127
chr18:13042202-13042349	+	71.226	59.016	0.001	302	61	144	50
chr18:29493366-29493485	-	86.813	0	0	158	12	0	11
chr19:3661370-3661524	-	57.426	15.942	0	232	86	22	58
chr19:37203494-37203563	+	36.471	0	0	31	27	0	34
chr2:132314923-132315036	+	64.126	37.143	0.002	143	40	13	11
chr2:135702644-135703545	+	4.871	0	0	17	166	0	147
chr2:135703356-135703545	+	4.871	0	0	17	166	0	147
chr2:159433782-159434775	+	76.569	64.885	0.003	183	28	170	46
chr2:168699831-168700055	-	9.677	3.158	0	30	140	30	460
chr2:173429238-173429415	+	99.471	0	0	752	2	0	7
chr2:17891352-17891540	-	1.832	0	0	10	268	0	327
chr2:179403424-179403456	+	95.984	86.364	0	239	5	190	15
chr2:179404622-179404705	+	64.407	0	0	76	21	0	16
chr2:179407542-179407595	+	9.091	3	0.008	19	95	6	97
chr2:183859987-183860039	-	1.066	0	0	15	696	0	892
chr2:204111579-204111644	+	97.368	0	0	74	1	0	11
chr2:240939599-240939804	-	7.491	0	0	40	247	0	490
chr2:27822840-27822920	+	90.551	0	0	230	12	0	7
chr2:29137864-29140861	+	95.455	0	0	168	4	0	13
chr2:38975188-38975251	-	99.475	97.249	0	758	2	4100	58
chr20:34243063-34243266	-	100	0	0	655	0	0	12
chr20:45909710-45909851	-	3.351	0.426	0	19	274	3	351
chr20:51155290-51155600	+	89.091	50	0	49	3	32	16
chr21:11049449-11049616	-	97.84	86.014	0	1540	17	123	10
chr21:17137100-17137203	+	14.076	0	0	96	293	0	97
chr21:17137123-17137203	+	8.723	0	0	56	293	0	97
chr21:38538488-38538917	+	85.366	0	0	175	15	0	21
chr21:44282355-44282504	-	94.444	0	0	136	4	0	18
chr22:19462426-19462623	-	95.131	92.695	0.003	1055	27	2411	95
chr22:19485026-19486674	+	98.5	0	0	1445	11	0	40
chr22:19486623-19488303	+	98.484	97.111	0.003	1429	11	2958	44
chr22:22024587-22024665	+	8.434	2.857	0	35	190	51	867
chr3:12543166-12543223	+	1.892	0	0.009	13	337	0	149
chr3:180652514-180652586	+	10.204	0	0	10	44	0	341
chr3:197593023-197593090	+	91.628	0	0	197	9	0	13
chr3:24359911-24359985	-	12.381	0	0.007	13	46	0	23
chr3:25781067-25781941	-	100	95.918	0.001	239	0	329	7
chr3:43592963-43593058	-	9.325	1.887	0	29	141	13	338
chr3:9471252-9471735	+	47.586	0	0	69	38	0	35
chr3:9477751-9477824	+	5.382	0	0	19	167	0	139
chr4:127383373-127383511	-	28.125	14.745	0.001	36	46	55	159
chr4:99957104-99959092	+	5.296	1.721	0.004	17	152	9	257
chr5:10401571-10401598	+	0.948	0	0	17	888	0	567
chr5:138614185-138614429	+	3.956	0	0	80	971	0	2530
chr5:41805553-41805783	-	92.683	0	0	152	6	0	10
chr5:6619556-6619580	-	5.977	2.281	0	37	291	31	664
chr5:95116099-95116129	+	98.384	0	0	609	5	0	10
chr6:126327756-126328100	+	13.631	0	0	119	377	0	254
chr6:126331523-126332200	+	9.434	4.4	0.004	30	144	22	239
chr6:160206935-160207029	-	99.922	99.434	0.003	2576	1	1758	5
chr6:20576609-20576705	+	5.727	0.813	0.002	13	107	2	122
chr6:43526267-43526328	-	94.51	0	0	241	7	0	13
chr6:534507-534580	-	5.051	0.483	0.004	10	94	1	103
chr6:56915571-56915601	+	96.525	84.937	0	500	9	203	18
chr7:10601108-10601204	-	100	87.805	0	403	0	72	5
chr7:10604611-10604664	-	56.65	0	0	230	88	0	36
chr7:11142112-11150178	+	33.742	10.82	0	55	54	33	136
chr7:12406982-12407144	-	86.873	79.805	0.008	225	17	490	62
chr7:12412115-12412873	-	96.185	88.172	0	353	7	328	22
chr7:12412803-12414388	-	97.717	92.095	0	428	5	466	20
chr8:141357855-141358045	-	21.154	1.099	0	22	41	1	45
chr8:141889613-141889736	-	71.354	0	0	274	55	0	31
chr8:21850342-21851962	+	100	0	0	479	0	0	14
chr8:28837587-28837666	+	95.699	89.677	0.009	356	8	139	8
chr8:28866939-28867023	+	2.542	0	0.001	12	230	0	202
chr8:42328681-42328719	-	17.365	0	0	29	69	0	72
chr8:42719759-42719836	-	32.456	6.897	0	74	77	20	135
chr8:48881838-48882617	+	100	0	0	600	0	0	5
chr8:68014321-68015370	+	87.037	0	0	94	7	0	8
chr8:87410803-87410867	+	82.55	0	0	123	13	0	10
chr8:93877593-93877671	-	100	0	0	46	0	0	6
chr9:100840047-100840168	+	2.913	0	0	15	250	0	848
chr9:108476646-108476786	+	6.173	3.051	0.003	30	228	36	572
chr9:123205880-123206020	-	75	0	0	138	23	0	13
chr9:126571392-126571500	-	10	0	0	18	81	0	141
chr9:37144631-37144705	+	6.755	0	0	61	421	0	434
chr9:37144631-37147442	+	3.023	0	0	26	417	0	443
chrX:102089555-102089904	+	63.265	22.222	0	31	9	12	21
chrX:102091946-102092330	+	36.17	5.66	0	17	15	3	25
chrX:102094842-102094900	+	64	0	0	32	9	0	12
chrX:122811934-122812072	-	1.993	0.658	0.004	22	541	8	604
chrX:134963240-134963465	-	84.705	66.667	0	3356	303	88	22
chrX:23752448-23752484	-	73.684	0	0	56	10	0	27
chrX:3772732-3772968	-	54.516	0	0	338	141	0	16
chrX:65418719-65420594	+	100	95.355	0	702	0	780	19
chrX:65420415-65420594	+	100	93.312	0	668	0	586	21

## Sheet: HepG2
Chrom:Start-End	Strand	Circular_psi	Linear_psi	P_value	Circular_inclusion_reads	Circular_exclusion_reads	Linear_inclusion_reads	Linear_exclusion_reads
chr1:231092166-231092228	-	22.148	0	0	33	58	0	46
chr1:246092813-246092854	-	15.254	0	0	63	175	0	166
chr1:29609187-29610488	+	91.919	75.728	0	91	4	156	25
chr11:47194260-47195033	-	100	0	0	41	0	0	8
chr11:68132467-68132616	+	2.101	0	0.003	10	233	0	189
chr12:109046813-109046957	-	6.448	1.597	0	51	370	20	616
chr12:109510112-109510155	+	90.698	0	0	39	2	0	5
chr12:133393245-133393398	-	100	88.235	0	148	0	150	10
chr12:22821531-22821656	+	13.978	1.282	0	13	40	2	77
chr12:27135705-27135788	-	100	92.063	0.002	89	0	232	10
chr13:100958004-100958088	+	8.434	1.163	0.001	14	76	2	85
chr13:52293333-52293436	+	100	94.309	0.001	159	0	232	7
chr13:52301857-52301926	+	100	0	0	149	0	0	7
chr16:16110440-16110478	+	91.045	0	0	244	12	0	11
chr16:87762915-87762970	-	5.505	0	0.001	12	103	0	88
chr16:89493174-89493477	-	55.556	0	0	40	16	0	61
chr17:4586324-4586374	-	6.007	0	0.003	17	133	0	55
chr17:53479574-53479664	-	21.29	3.32	0	33	61	48	699
chr17:80725980-80726092	+	3.926	0	0	17	208	0	189
chr18:33780157-33780269	+	60.804	0	0	121	39	0	6
chr18:33780157-33780287	+	91.917	0	0	887	39	0	6
chr18:60015941-60016066	+	16.832	0	0	17	42	0	46
chr19:3544559-3544730	-	20.713	0	0.001	93	178	0	17
chr19:3661370-3661524	-	25.059	3.145	0	214	320	5	77
chr19:40327533-40327613	-	0.168	0	0	13	3856	0	4029
chr2:112687007-112687117	+	100	0	0	45	0	0	21
chr2:21259971-21260983	-	99.98	97.704	0	29584	3	9022	106
chr2:240939599-240939804	-	18.043	0	0	59	134	0	809
chr2:36615114-36615218	+	5.287	0	0	23	206	0	179
chr20:61297731-61298628	+	100	71.681	0	116	0	162	32
chr21:46558212-46558290	+	48.936	5.263	0.001	23	12	1	9
chr3:13543129-13543433	+	89.831	0	0	106	6	0	21
chr3:197593023-197593090	+	74.257	0	0	150	26	0	32
chr4:54308292-54308364	+	3.65	0	0	10	132	0	198
chr5:138629141-138629494	+	65.845	55.164	0.001	374	97	219	89
chr5:179677494-179677701	-	2.564	0	0.001	11	209	0	206
chr5:179706795-179706887	-	47.867	4.382	0	101	55	11	120
chr5:648480-648520	+	12.442	0	0.002	27	95	0	26
chr5:95116099-95116129	+	95.543	0	0	686	16	0	11
chr6:82767839-82767934	-	46.154	9.434	0	24	14	5	24
chr8:128174166-128176771	-	50.943	21.951	0	162	78	9	16
chr8:128186434-128186609	-	91.73	26.667	0	843	38	16	22
chr8:128197071-128198015	-	21.436	0	0.005	203	372	0	11
chr8:42719755-42719836	-	16.475	0	0	43	109	0	162
chr8:42719759-42719836	-	19.557	2.994	0	53	109	10	162
chr9:138774060-138774222	-	12.233	0	0	143	513	0	40

## Sheet: BJ
Chrom:Start-End	Strand	Circular_psi	Linear_psi	P_value	Circular_inclusion_reads	Circular_exclusion_reads	Linear_inclusion_reads	Linear_exclusion_reads
chr1:12638745-12638802	-	99.485	97.636	0	6953	18	1404	17
chr1:16528601-16528701	-	37.748	0.699	0	57	47	1	71
chr1:230807004-230807150	+	11.31	1.408	0	38	149	4	140
chr1:246092813-246092854	-	14.985	0	0	98	278	0	199
chr1:28119820-28119880	+	8.594	0	0	22	117	0	259
chr10:69799155-69799245	-	8.295	1.25	0	36	199	4	158
chr10:69818312-69818510	-	4.376	1.095	0	27	295	6	271
chr10:88820444-88820809	-	100	98.811	0.004	629	0	831	5
chr11:120300429-120300540	+	76.636	0	0	925	141	0	40
chr11:35227658-35229753	+	98.02	50.943	0	99	1	27	13
chr11:86786678-86786828	+	53.488	0	0	23	10	0	23
chr12:109046813-109046957	-	10.411	0.625	0	654	2814	25	1988
chr12:111916873-111916906	-	36.156	0	0	111	98	0	70
chr12:116674625-116674695	-	35.049	0	0	395	366	0	100
chr12:19619681-19619784	+	7.097	0	0.001	11	72	0	68
chr12:42778701-42778798	+	100	0	0	23	0	0	26
chr12:53858543-53858815	+	63.973	60.103	0	11006	3099	2100	697
chr12:56745075-56745226	-	99.513	98.099	0.003	2043	5	516	5
chr12:96114502-96114596	-	0.777	0.376	0.005	53	3382	16	2122
chr13:100958004-100958088	+	22.124	0	0	25	44	0	18
chr13:114164855-114165509	+	1.411	0.241	0	31	1083	7	1450
chr13:114164855-114166302	+	0.915	0.309	0.004	20	1083	9	1450
chr13:114170357-114170422	+	2.498	0.207	0	54	1054	6	1445
chr13:114173849-114173970	+	5.925	0.345	0	132	1048	10	1446
chr13:114173849-114174043	+	6.554	0.31	0	147	1048	9	1446
chr13:114173849-114174116	+	7.051	0.755	0	159	1048	22	1446
chr13:114174093-114174116	+	7.704	0	0	205	1228	0	1446
chr13:114174093-114174189	+	4.658	0	0	120	1228	0	1446
chr13:114821930-114822133	-	19.708	1.873	0	27	55	5	131
chr13:76329933-76330127	+	1.867	0.202	0.005	14	368	1	247
chr14:101443271-101444059	+	25.758	0	0.002	34	49	0	12
chr14:101443941-101444031	+	36.416	4	0	63	55	1	12
chr14:52160072-52160145	+	1.073	0	0	34	1567	0	1870
chr14:71455286-71455416	+	82.494	63.504	0	1065	113	174	50
chr14:71884800-71884913	+	15.789	0	0	21	56	0	28
chr15:25652213-25652375	-	28.947	13.744	0	176	216	29	91
chr15:71538278-71538383	+	8.779	0	0	41	213	0	108
chr15:76584771-76585041	-	100	99.433	0.008	1087	0	1755	5
chr16:53188358-53188455	+	24.823	0	0	35	53	0	23
chr16:69681211-69681489	+	49.474	0	0	94	48	0	33
chr17:25634769-25634945	+	86.777	76.996	0	315	24	569	85
chr17:30501375-30501457	+	9.709	0	0	20	93	0	166
chr17:46110051-46110668	-	95.624	92.098	0	2098	48	2191	94
chr17:60766971-60767121	+	100	0	0	92	0	0	16
chr17:79030202-79030277	+	18.75	0	0	30	65	0	47
chr18:21602504-21602811	+	20.773	1.292	0	43	82	5	191
chr19:3661370-3661524	-	24.9	0.483	0	872	1315	3	309
chr19:37203494-37203563	+	53.333	0	0	32	14	0	24
chr2:112004731-112005818	-	53.333	0	0	32	14	0	76
chr2:15673364-15673409	-	2.423	0	0.008	15	302	0	116
chr2:191784353-191784403	+	5.532	0	0	13	111	0	338
chr2:191784353-191784974	+	8.182	0	0	18	101	0	325
chr2:225421011-225421155	-	13.333	0	0	16	52	0	40
chr2:232154617-232154732	+	3.62	0	0	16	213	0	462
chr2:238939196-238939993	+	100	94.4	0.007	105	0	236	7
chr2:240939599-240939804	-	5.686	0	0	34	282	0	421
chr2:36596250-36596392	+	5.352	0.122	0	280	2476	5	2054
chr2:36605996-36606682	+	3.32	0	0	163	2373	0	1748
chr2:36615114-36615218	+	9.426	0	0	557	2676	0	2057
chr2:36615114-36617912	+	3.55	0	0	197	2676	0	2057
chr2:36615114-36623930	+	78.407	0	0	2382	328	0	311
chr2:36658251-36658364	+	0.959	0	0	48	2479	0	2297
chr2:36668403-36668837	+	18.584	0	0	21	46	0	41
chr2:36764497-36764689	+	96.386	93.396	0	11043	207	4554	161
chr2:48689334-48689439	+	48.148	0	0	13	7	0	48
chr2:61752176-61752468	-	22.414	4.075	0	26	45	13	153
chr2:61752404-61752694	-	38.356	4.375	0	56	45	14	153
chr2:86686878-86687954	+	3.564	0	0	17	230	0	137
chr2:9427132-9427241	+	23.438	0	0	60	98	0	106
chr20:23375775-23375899	-	100	60	0	35	0	27	9
chr20:23375775-23376104	-	100	60	0	36	0	27	9
chr20:2968367-2968500	+	3.425	0	0	10	141	0	318
chr21:16387465-16387546	-	20.507	0	0	97	188	0	53
chr21:17136556-17136616	+	4.762	0	0	15	150	0	107
chr21:17137100-17137203	+	4.762	0	0	15	150	0	107
chr22:17527235-17527304	+	27.273	0	0	60	80	0	33
chr22:18081141-18081222	-	4.825	0	0	22	217	0	904
chr22:18145682-18145779	+	11.927	0	0	13	48	0	64
chr22:50832178-50832228	+	13.5	1.468	0	54	173	7	235
chr3:123411129-123411698	-	100	99.376	0	2349	0	1592	5
chr3:123518393-123521597	-	0.298	0	0	20	3348	0	1556
chr3:123551489-123551650	-	31.27	20.152	0	293	322	212	420
chr3:123551489-123554782	-	34.632	24.263	0	320	302	255	398
chr3:128515987-128516061	+	5.224	0	0	14	127	0	1113
chr3:196127499-196127603	-	5.114	0	0.001	18	167	0	79
chr3:197593023-197593090	+	72.928	0	0	264	49	0	27
chr3:43592963-43593058	-	6.977	1.111	0	18	120	6	267
chr3:99422150-99422230	+	3.079	1.777	0.007	57	897	33	912
chr4:107130024-107130178	-	4.167	0.599	0	14	161	3	249
chr4:3104316-3104475	+	12.821	0	0.001	15	51	0	32
chr4:38099645-38099733	+	6.299	0	0	16	119	0	264
chr4:73951112-73951163	-	95.437	0	0	251	6	0	8
chr4:77919039-77919115	+	0.471	0.146	0	52	5493	11	3767
chr4:77919039-77919154	+	0.408	0.119	0	45	5493	9	3767
chr4:77935434-77935532	+	0.565	0.128	0	29	2551	9	3512
chr4:85819604-85819750	-	11.111	0	0.002	26	104	0	31
chr5:122885921-122885996	+	20.325	1.235	0	25	49	1	40
chr5:131549608-131549720	-	100	99.478	0.004	1280	0	3047	8
chr5:172361735-172361868	+	0.967	0	0	41	2099	0	1701
chr5:64509864-64509953	-	72.358	55.556	0.008	89	17	50	20
chr6:102355371-102355461	+	5.244	0	0	29	262	0	148
chr6:151306185-151306344	+	6.633	2.663	0.006	26	183	11	201
chr6:16738384-16740149	-	22.794	0	0	248	420	0	120
chr6:169633499-169635002	-	52.068	0	0	365	168	0	133
chr6:5408348-5408532	+	7.08	0	0.002	16	105	0	53
chr8:141893200-141894267	-	1.139	0	0.007	23	998	0	238
chr8:30336435-30336489	+	6.468	0	0	26	188	0	420
chr8:42719759-42719836	-	16.294	0	0	51	131	0	137
chr8:42919247-42919358	+	90.909	0	0	40	2	0	8
chr9:111853190-111853432	-	89.362	62.5	0.001	84	5	20	6
chr9:114908258-114908453	-	4.283	0	0	23	257	0	130
chr9:125048188-125048225	+	32.955	0	0	58	59	0	122
chr9:134312232-134312282	+	34.409	1.124	0	128	122	1	44
chr9:82240499-82240571	+	0.979	0	0	60	3033	0	722
chr9:95020085-95020268	-	1.974	0.524	0	30	745	8	760
chrX:3744702-3744770	-	54.783	0	0	63	26	0	6

## Sheet: GM12878
Chrom:Start-End	Strand	Circular_psi	Linear_psi	P_value	Circular_inclusion_reads	Circular_exclusion_reads	Linear_inclusion_reads	Linear_exclusion_reads
chr1:246092813-246092854	-	29.348	0.83	0	108	130	4	239
chr1:31455386-31455487	-	5.306	0.29	0	26	232	1	172
chr10:103571199-103572680	-	5.6	0	0	14	118	0	533
chr10:105197967-105198035	+	1.748	0	0.007	10	281	0	184
chr10:105197967-105198082	+	2.431	0	0.001	14	281	0	184
chr10:121945344-121945404	+	42.647	19.048	0.004	58	39	8	17
chr10:121945344-121945635	+	45.07	19.048	0.002	64	39	8	17
chr10:121964506-121964598	+	99.532	80.282	0	425	1	57	7
chr10:96207391-96207427	+	78.378	6.667	0	29	4	2	14
chr10:99023176-99023246	-	100	94.805	0.001	184	0	219	6
chr11:61096960-61097056	-	94.5	0	0	378	11	0	6
chr12:109046813-109046957	-	14.266	0.585	0	203	610	11	934
chr12:123082287-123082485	+	100	0	0	36	0	0	14
chr12:129411660-129411699	+	86.159	0	0	249	20	0	54
chr12:19619681-19619784	+	6.25	0	0	18	135	0	140
chr12:76860229-76860268	-	3.704	0.498	0.001	10	130	3	300
chr13:114170357-114170422	+	11.34	0	0	22	86	0	60
chr13:114173849-114173970	+	12.844	0	0	28	95	0	61
chr13:114173849-114174116	+	14.027	0	0	31	95	0	61
chr14:103352525-103355971	+	98.046	94.56	0.001	602	6	591	17
chr14:71476350-71478266	+	99.407	96.929	0	1006	3	505	8
chr14:71884800-71884913	+	66.423	0	0	91	23	0	32
chr14:71948871-71948928	+	20	0	0.008	24	48	0	12
chr14:72085921-72086105	+	6.513	0	0	17	122	0	107
chr14:83692105-83692469	+	77.966	45.455	0	92	13	50	30
chr14:91655999-91656151	+	11.688	4.931	0.004	18	68	25	241
chr15:25652213-25652375	-	32.782	21.713	0.001	119	122	71	128
chr15:25652213-25652379	-	32.967	21.951	0.001	120	122	72	128
chr15:25652213-25653831	-	48.956	25.373	0	211	110	85	125
chr15:85657103-85658504	+	100	92.283	0	135	0	287	12
chr16:89493174-89493477	-	62.791	0	0	27	8	0	25
chr17:18821602-18821700	+	3.333	0	0	10	145	0	319
chr17:53479526-53479664	-	27.059	0	0	23	31	0	118
chr17:64509453-64509499	+	47.335	8.434	0	151	84	14	76
chr17:67109362-67109488	-	94.286	74.129	0	66	2	149	26
chr17:80834656-80834857	+	3.125	0	0.005	14	217	0	100
chr17:80858471-80858607	+	92.329	0	0	337	14	0	7
chr18:44398240-44398410	-	22.034	9.032	0.006	13	23	28	141
chr19:14700550-14700905	+	3.469	1.343	0	114	1586	22	808
chr19:14700686-14700905	+	3.115	1.283	0	102	1586	21	808
chr19:3661370-3661524	-	38.462	5.882	0	100	80	2	16
chr2:12301788-12301916	+	11.894	4.933	0.006	27	100	11	106
chr2:12304821-12304941	+	10.891	0	0	22	90	0	92
chr2:144968388-144968804	-	12.676	1.25	0	18	62	2	79
chr2:20478343-20478441	-	57.107	44.483	0	450	169	383	239
chr2:215657850-215657949	-	5.124	0	0	35	324	0	337
chr2:24786772-24786882	+	50	0	0	16	8	0	17
chr2:32874163-32874321	+	2.976	0	0	10	163	0	257
chr2:70242579-70242712	-	21.569	0	0	11	20	0	47
chr21:16412683-16412737	-	47.664	24	0.002	102	56	12	19
chr21:17136556-17136616	+	10.28	0	0	33	144	0	159
chr21:17137123-17137203	+	4.615	0	0	12	124	0	149
chr21:46580015-46580138	+	27.66	5.556	0	13	17	8	68
chr22:37628840-37629847	-	100	98.573	0.004	442	0	1243	9
chr22:38891839-38891942	-	98.71	0	0	765	5	0	10
chr3:118445697-118445769	-	91.753	51.613	0	89	4	32	15
chr3:171361883-171361954	-	3.75	0	0	12	154	0	206
chr3:182805062-182805201	-	7.177	0	0	15	97	0	236
chr3:197593023-197593090	+	94.137	0	0	289	9	0	13
chr3:49348713-49348791	-	8.021	0.388	0	15	86	2	257
chr4:3103989-3104475	+	6.716	0	0.001	18	125	0	59
chr4:42609813-42613259	-	7.514	0	0	26	160	0	247
chr4:42613118-42613259	-	8.832	3.327	0.001	31	160	17	247
chr4:88010732-88010842	+	6.859	0	0	19	129	0	86
chr5:130593569-130594665	+	13.131	0	0	13	43	0	118
chr5:130594587-130594665	+	33.333	21.656	0.007	45	45	68	123
chr5:172361735-172361868	+	1.124	0	0.001	10	440	0	464
chr5:43648025-43648708	+	4.943	1.408	0.007	13	125	6	210
chr5:80809476-80809536	-	86.047	0	0	111	9	0	14
chr6:149311510-149311565	+	8.434	2.2	0	14	76	13	289
chr6:17640169-17640277	-	100	94.346	0.001	139	0	267	8
chr6:33747612-33747793	-	7.097	0.358	0	11	72	1	139
chr7:128218017-128218987	+	26.667	0	0	24	33	0	16
chr7:87606778-87606886	+	4.514	0	0.001	33	349	0	81
chr8:129007128-129010605	+	9.63	0	0	13	61	0	137
chr8:42719759-42719836	-	39.906	3.468	0	85	64	12	167
chr9:126571392-126571500	-	4.249	0	0	15	169	0	152
chr9:14677295-14677369	-	54.217	32.432	0.005	45	19	24	25
chr9:14677295-14677470	-	54.217	33.333	0.006	45	19	25	25
chr9:5665677-5666072	+	3.189	0.763	0.009	17	258	3	195
chr9:5736334-5736392	+	7.212	0.885	0	30	193	5	280
chrX:13754306-13754415	+	10.85	0	0	37	152	0	902

## Sheet: NHEK
Chrom:Start-End	Strand	Circular_psi	Linear_psi	P_value	Circular_inclusion_reads	Circular_exclusion_reads	Linear_inclusion_reads	Linear_exclusion_reads
chr1:231092166-231092228	-	8.148	0	0	11	62	0	65
chr10:47167069-47167103	-	99.959	99.542	0	4911	1	4778	11
chr10:47753578-47753789	+	100	73.516	0	283	0	322	58
chr10:47753917-47753951	+	99.959	99.564	0	4830	1	5024	11
chr10:48262247-48262281	+	99.959	99.432	0	4911	1	4902	14
chr10:48266341-48267229	+	98.953	97.669	0	2834	15	4525	54
chr10:96207391-96207427	+	41.935	0	0	13	9	0	26
chr11:35227667-35227790	+	96.544	0	0	2235	40	0	157
chr12:1221384-1221464	+	100	0	0	18	0	0	16
chr12:27135705-27135788	-	95.906	91.696	0.003	328	7	1590	72
chr14:71884800-71884913	+	44	0	0	11	7	0	26
chr14:71884824-71884913	+	48.148	0	0	13	7	0	26
chr14:71933763-71933964	+	31.707	0	0	13	14	0	28
chr14:71933835-71933964	+	30	0	0	12	14	0	28
chr15:60666817-60674640	-	99.677	99.528	0.003	19133	31	75954	180
chr15:71518759-71518856	+	6.277	0	0	43	321	0	236
chr15:71519913-71519992	+	11.417	2.51	0	83	322	12	233
chr15:71525369-71525415	+	5.832	1.66	0	41	331	8	237
chr15:71538278-71538383	+	13.687	2.742	0	124	391	19	337
chr15:76584771-76585041	-	100	99.186	0.002	855	0	3655	15
chr16:19627721-19628130	+	94.059	0	0	95	3	0	7
chr16:53188358-53188455	+	27.778	12.042	0.003	20	26	23	84
chr16:70179579-70179651	+	1.815	0	0.001	18	487	0	229
chr16:87789019-87790083	-	86.207	0	0	25	2	0	6
chr17:3959552-3959639	-	53.333	0	0	32	14	0	12
chr17:48154349-48154485	+	99.34	0	0	903	3	0	45
chr17:64509453-64509499	+	29.487	0	0	46	55	0	72
chr18:21487820-21487899	+	97.786	0	0	4682	53	0	191
chr18:21758125-21758159	-	97.98	88.686	0	291	3	533	34
chr18:9594084-9594232	-	1.356	0	0	11	400	0	1028
chr19:3661370-3661512	-	16.314	1.205	0	131	336	2	82
chr19:3661370-3661524	-	23.288	1.205	0	204	336	2	82
chr2:100041234-100041361	-	20.339	9.459	0.002	24	47	42	201
chr2:216240351-216241397	-	100	99.673	0	20398	0	48780	80
chr2:216245533-216247048	-	100	99.918	0.002	8878	0	26795	11
chr2:216245689-216245803	-	24.035	0	0	3412	5392	0	9942
chr2:234298574-234298687	+	18.841	0	0	13	28	0	47
chr2:26597907-26597957	+	100	85.58	0	194	0	273	23
chr2:36615114-36615218	+	11.221	0.556	0	68	269	10	894
chr2:73306778-73307990	-	41.176	23.779	0.003	28	20	73	117
chr20:5957934-5958025	+	31.707	6.757	0	13	14	10	69
chr21:16387465-16387546	-	6.748	0.885	0	22	152	3	168
chr21:16412683-16412724	-	31.013	0.89	0	98	109	3	167
chr21:17137100-17137203	+	5.82	0	0	11	89	0	165
chr21:47958395-47958513	+	100	94.156	0	173	0	290	9
chr22:41279155-41279230	+	4.516	0	0	14	148	0	293
chr3:111616552-111630571	+	6.05	0.158	0	51	396	3	948
chr3:11712747-11712868	-	5.528	0	0	11	94	0	211
chr3:197593023-197593090	+	87.013	0	0	134	10	0	21
chr4:3104332-3104475	+	5.882	0	0	10	80	0	104
chr4:75046474-75046583	+	36.318	0	0	73	64	0	102
chr4:9990171-9990214	-	5.913	2.354	0.002	23	183	19	394
chr5:122885921-122885996	+	25.49	1.859	0	13	19	5	132
chr6:116752079-116752356	+	100	0	0	536	0	0	9
chr7:129823542-129823584	-	6.757	1.672	0.007	10	69	5	147
chr8:130916570-130916831	-	49.02	24.176	0	25	13	176	276
chr8:131373915-131374034	-	66.897	43.056	0	194	48	124	82
chr8:141893200-141894472	-	1.743	0	0	11	310	0	490
chr9:111853185-111853432	-	72.222	0	0	26	5	0	16
chr9:134312232-134312282	+	23.232	0.917	0	46	76	2	108

## Sheet: H1
Chrom:Start-End	Strand	Circular_psi	Linear_psi	P_value	Circular_inclusion_reads	Circular_exclusion_reads	Linear_inclusion_reads	Linear_exclusion_reads
chr1:155410293-155410384	-	12	0	0.001	18	66	0	33
chr1:1752563-1752754	-	0.607	0.14	0.007	11	901	4	1429
chr1:231092166-231092228	-	30.579	0	0	37	42	0	24
chr1:53738275-53741425	-	89.773	0	0	158	9	0	22
chr1:82348738-82348802	+	1.541	0	0.004	16	511	0	218
chr10:21972238-21977467	+	16.461	0	0	80	203	0	107
chr11:128997106-128997200	-	22.414	0	0.007	26	45	0	11
chr11:67351967-67352041	+	99.364	97.525	0.001	625	2	2364	30
chr11:85374222-85374337	-	31.148	15.344	0.007	19	21	29	80
chr12:109046813-109046957	-	7.046	0.719	0	57	376	4	276
chr12:19619681-19619784	+	6.195	0	0	28	212	0	89
chr13:100958004-100958088	+	11.364	0	0	50	195	0	56
chr13:114170357-114170422	+	6.83	0	0	39	266	0	365
chr13:52293333-52293486	+	97.746	92.188	0.007	347	4	118	5
chr14:75356553-75356655	+	91.371	0	0	360	17	0	30
chr14:89761758-89761860	-	5.367	0.415	0	38	335	2	240
chr15:25298974-25300013	+	97.606	94.977	0.007	1223	15	416	11
chr15:25300116-25300377	+	20.858	16.489	0.001	457	867	216	547
chr15:25300225-25300377	+	15.62	12.269	0.004	321	867	153	547
chr15:25312555-25312678	+	38.17	23.416	0	484	392	255	417
chr15:25312561-25312678	+	43.027	0	0	580	384	0	415
chr15:25316434-25317721	+	1.176	0	0	24	1008	0	961
chr15:25324972-25325124	+	13.792	10.204	0.003	319	997	95	418
chr15:25324972-25325226	+	27.918	20.68	0	794	1025	219	420
chr15:25325245-25325376	+	1.322	0	0	40	1493	0	545
chr15:25325271-25325376	+	1.354	0.183	0	41	1493	2	545
chr15:25326327-25326371	+	89.789	0	0	1530	87	0	18
chr15:25331088-25331761	+	10.167	0	0	244	1078	0	491
chr15:25331477-25331761	+	11.466	7.446	0	280	1081	79	491
chr15:25331481-25331761	+	9.917	0	0	238	1081	0	491
chr15:25331543-25331761	+	10.017	0	0	240	1078	0	491
chr15:25334811-25335157	+	12.113	0	0	137	497	0	207
chr15:25334992-25335013	+	54.508	0	0	1191	497	0	207
chr15:25335108-25335157	+	4.045	0	0	137	1625	0	1009
chr15:25336915-25337078	+	5.18	1.285	0	72	659	15	576
chr15:25339205-25340975	+	82.834	0	0	415	43	0	30
chr15:25341989-25342177	+	7.852	0	0	53	311	0	578
chr15:25342527-25342586	+	75.887	0	0	321	51	0	10
chr15:25652213-25653831	-	36.757	20.968	0.001	136	117	26	49
chr18:29703486-29703537	+	91.429	0	0	192	9	0	6
chr18:34385320-34385465	-	88.738	0	0	457	29	0	37
chr18:8625798-8625992	+	44.503	26.316	0	85	53	105	147
chr19:21675719-21675836	+	10.329	0	0	44	191	0	45
chr19:3661370-3661524	-	32.723	5.986	0	143	147	34	267
chr2:100048202-100048402	-	56.338	29.167	0	80	31	28	34
chr2:111597375-111597548	+	13.386	0	0	34	110	0	93
chr2:111666375-111666482	+	100	0	0	52	0	0	6
chr2:175805543-175805622	-	46.774	15.315	0	58	33	17	47
chr2:232153372-232154732	+	7.879	0.667	0	13	76	2	149
chr2:240939599-240939804	-	12.121	0	0	32	116	0	428
chr2:64083921-64084852	+	4.401	0	0	29	315	0	278
chr20:17934639-17935307	-	100	94.262	0	328	0	230	7
chr20:31372495-31372665	+	96.109	90.38	0	1235	25	4491	239
chr20:31376659-31379372	+	93.952	86.161	0	435	14	909	73
chr20:31381341-31382465	+	75.425	65.795	0	798	130	931	242
chr21:17136556-17136616	+	7.268	0	0.001	29	185	0	51
chr3:186666642-186666726	+	22.535	4.645	0	32	55	19	195
chr3:197593023-197593090	+	87.406	0	0	347	25	0	20
chr3:9475071-9475246	+	32.283	0	0	123	129	0	88
chr4:1940235-1940259	+	85.075	0	0	57	5	0	6
chr4:56283238-56284331	+	100	97.781	0	521	0	793	9
chr5:137497460-137497553	-	100	0	0	137	0	0	5
chr6:107420095-107420138	-	10.345	0	0.001	21	91	0	38
chr6:107420095-107420191	-	14.554	0	0	31	91	0	38
chr6:149285048-149285240	+	6.41	0	0.001	10	73	0	72
chr6:22062992-22063469	+	71.429	0	0	90	18	0	12
chr7:121740048-121741492	-	99.087	0	0	1303	6	0	12
chr7:121753171-121753774	-	98.785	97.503	0	8779	54	3280	42
chr7:64774345-64774511	+	34.884	0	0	15	14	0	18
chr7:87600608-87600690	+	18.216	3.797	0	49	110	6	76
chr8:21848327-21848430	+	93.156	0	0	490	18	0	6
chr8:30336435-30336489	+	8.189	1.054	0	33	185	16	751
chr8:35117493-35117666	+	22.059	4.972	0	60	106	9	86
chr8:35125359-35125404	+	77.093	0	0	175	26	0	5
chr8:42719759-42719836	-	14.056	3.226	0.002	35	107	3	45
chr9:108476646-108476786	+	8.609	0	0	13	69	0	91
chr9:134312232-134312282	+	27.619	2.381	0	58	76	2	41
chr9:14677295-14677402	-	50	0	0	16	8	0	12
chr9:36390565-36390613	-	8.28	0	0.006	26	144	0	33
chr9:5736334-5736392	+	7.143	0.787	0.005	14	91	1	63
chr9:91031558-91033866	+	68.421	0	0	39	9	0	74
chr9:99696065-99696197	-	40.828	0	0	69	50	0	11
chr9:99948456-99948554	-	61.905	0	0	13	4	0	6
chrX:40526866-40526959	-	10.07	5.674	0.001	43	192	176	1463

[truncated: 6 more sheets: AG04450, HUVEC, H9_p(A)−, PA1_p(A)−, H9_p(A)−_RNaseR, PA1_p(A)−_RNaseR]
